# Supplementary material for: Identifying Natural Bioactive Peptides from the Common Octopus (Octopus vulgaris Cuvier, 1797) Skin Mucus By-Products Using Proteogenomic Analysis
Source: MDPI journal article supplement (doi:10.3390/ijms24087145), 2023-04-12
Supplement: s1 [file s1]

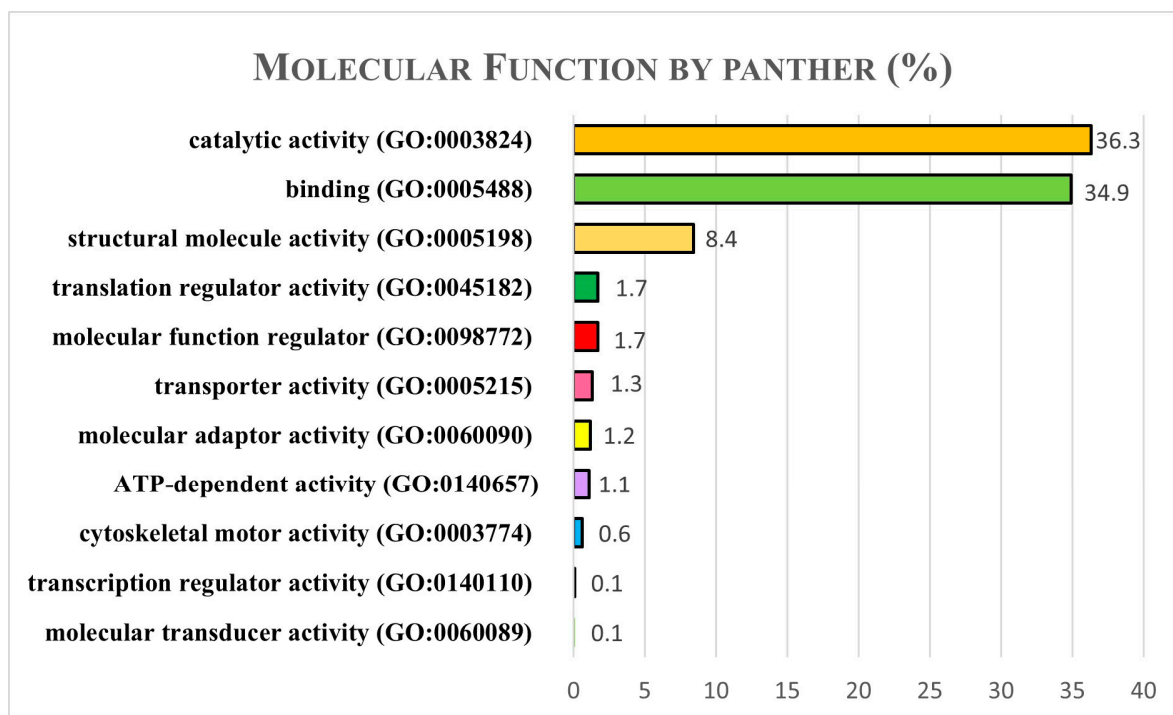

**Figure S1:** Molecular function of *O. vulgaris* skin mucus proteome identified by shotgun proteomics and categorized by PANTHER using the gene name as input for the software (<http://pantherdb.org>).

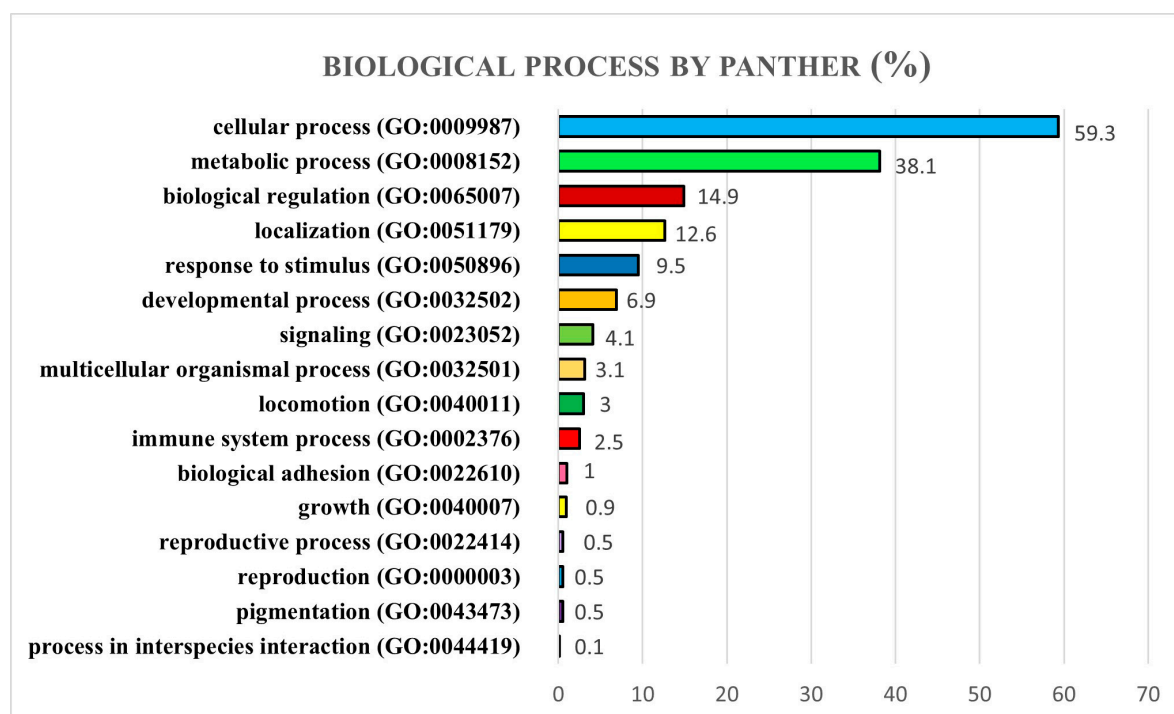

**Figure S2:** Biological process of *O. vulgaris* skin mucus proteome identified by shotgun proteomics and categorized by PANTHER using the gene name as input for the software (<http://pantherdb.org>).
