# Supplementary material for: Identifying Natural Bioactive Peptides from the Common Octopus (Octopus vulgaris Cuvier, 1797) Skin Mucus By-Products Using Proteogenomic Analysis
Source: Int J Mol Sci. 2023 Apr 12;24(8):7145. doi: 10.3390/ijms24087145 (PMC10138644; doi:10.3390/ijms24087145)
Supplement: Supplementary file 1 [file ijms-24-07145-s001.zip]

Archive with 6 entries (6 files):
- Figures S1 and S2.pdf
- Table S1. Proteomics analysis for the common octopus skin mucus proteome.xlsx
- Table S2. Octopus vulgaris skin mucus proteome (FDR < 1%).xlsx
- Table S3. PANTHER subgroups classifications.xlsx
- Table S4. Bioactive peptides digestions (trypsin and pepsin) using MS-Digest software.xlsx
- Table S5. Selected potential bioactive peptides of O. vulgaris skin mucus proteome predicted by in-silico digestions with pepsin and trypsin.xlsx
