# Supplementary material for: Identifying Natural Bioactive Peptides from the Common Octopus (Octopus vulgaris Cuvier, 1797) Skin Mucus By-Products Using Proteogenomic Analysis
Source: Int J Mol Sci. 2023 Apr 12;24(8):7145. doi: 10.3390/ijms24087145 (PMC10138644; doi:10.3390/ijms24087145)
Supplement: Supplementary file 1 [file ijms-24-07145-s001.zip › Table S1. Proteomics analysis for the common octopus skin mucus proteome.xlsx]

## Sheet: PSMs
Table S1: Proteomics analysis for the common octopus skin mucus proteome.
Confidence	Identifying Node Type	Identifying Node	Search ID	Identifying Node No	PSM Ambiguity	Sequence	Annotated Sequence	Modifications	# Proteins	Master Protein Accessions	Master Protein Descriptions	Protein Accessions	Protein Descriptions	# Missed Cleavages	Charge	Original Precursor Charge	DeltaScore	DeltaCn	Rank	Search Engine Rank	Concatenated Rank	m/z [Da]	MH+ [Da]	Theo. MH+ [Da]	DeltaM [ppm]	Deltam/z [Da]	Ions Matched	Matched Ions	Total Ions	Intensity	Activation Type	MS Order	Isolation Interference [%]	Ion Inject Time [ms]	RT [min]	First Scan	Last Scan	Master Scan(s)	Spectrum File	File ID	Peptides Matched	XCorr	# Protein Groups	Percolator q-Value	Percolator PEP	Percolator SVMScore
High	Sequest HT	Sequest HT (A2)	A	2	Unambiguous	NVNSLTPTDIKDLR	NVNSLTPTDIKDLR		1	A0A6P7SER3	hemocyanin 1-like OS=Octopus vulgaris OX=6645 GN=LOC115212215 PE=4 SV=2	A0A6P7SER3	hemocyanin 1-like OS=Octopus vulgaris OX=6645 GN=LOC115212215 PE=4 SV=2	1	3	3	0.2616	0	1	1	1	529.289	1585.85	1585.85	-1.27	-0.00067	0/0	0	0	2.63467e+06	HCD (High Energy Collision Dissociation)	MS2	20.472	14.764	43.5983	8162	8162	8160	MCMMCM34021206.raw	F6	1291	4.74	1	0.0001881	4.79x10⁻⁷	2.322
High	Sequest HT	Sequest HT (A2)	A	2	Unambiguous	LSSDTSEESLK	LSSDTSEESLK		3	A0A0L8FQW3	Uncharacterized protein OS=Octopus bimaculoides OX=37653 GN=OCBIM_22010545mg PE=4 SV=1	A0A0L8FQW3; A0A6P7T2E3; Cluster-58773.79304;orf1 len=287 frame:2 start:83 end:943 gi	Uncharacterized protein OS=Octopus bimaculoides OX=37653 GN=OCBIM_22010545mg PE=4 SV=1; heterogeneous nuclear ribonucleoprotein A1-like OS=Octopus vulgaris OX=6645 GN=LOC115218962 PE=4 SV=1; 524913816 ref|XP_005111732.1| PREDICTED: heterogeneous nuclear ribonucleoprotein A1-like isoform X1 [Aplysia californica]	0	2	2	0.548	0	1	1	1	598.289	1195.57	1195.57	0.95	0.00057	0/0	0	0	72756.3	HCD (High Energy Collision Dissociation)	MS2	5.25967	100	24.5367	4484	4484	4474	MCMMCM34021207.raw	F7	1112	2.5	1	0.0001881	3.78x10⁻⁴	1.185
High	Sequest HT	Sequest HT (A2)	A	2	Unambiguous	RDPVTVIR	RDPVTVIR		6	A0A6P7SCW1	protein-glutamine gamma-glutamyltransferase K-like OS=Octopus vulgaris OX=6645 GN=LOC115211108 PE=3 SV=1	Cluster-58773.216137;orf1 len=226 frame:-2 start:679 end:2 gi; Cluster-58773.79239;orf1 len=752 frame:1 start:577 end:2832 gi; Cluster-58773.79235;orf1 len=394 frame:1 start:577 end:1758 gi; A0A0L8G8E4; Cluster-58773.31205;orf1 len=114 frame:1 start:1 end:342 gi; A0A6P7SCW1	676463414 ref|XP_009056589.1| hypothetical protein LOTGIDRAFT_120391, partial [Lottia gigantea]>gi|556104253|gb|ESO92905.1| hypothetical protein LOTGIDRAFT_120391, partial [Lottia gigantea]; 871261399 ref|XP_012943258.1| PREDICTED: protein-glutamine gamma-glutamyltransferase K-like [Aplysia californica]; 871261399 ref|XP_012943258.1| PREDICTED: protein-glutamine gamma-glutamyltransferase K-like […	1	2	2	0.3989	0	1	1	1	478.288	955.57	955.568	1.27	0.00061	0/0	0	0	334347	HCD (High Energy Collision Dissociation)	MS2	6.75986	100	24.5	4476	4476	4474	MCMMCM34021207.raw	F7	521	3.71	1	0.0001881	5.53x10⁻⁴	1.121
High	Sequest HT	Sequest HT (A2)	A	2	Unambiguous	DAASCTTYCEAR	DAAScTTYcEAR	C5(Carbamidomethyl); C9(Carbamidomethyl)	4	A0A7E6F5Q5	uncharacterized protein LOC115216258 OS=Octopus vulgaris OX=6645 GN=LOC115216258 PE=4 SV=1	Cluster-58773.189244;orf2 len=3024 frame:2 start:1883 end:10954 gi; Cluster-58773.227066;orf1 len=313 frame:-2 start:941 end:3 gi; Cluster-58773.189245;orf1 len=3614 frame:1 start:127 end:10968 gi; A0A7E6F5Q5	676428526 ref|XP_009045304.1| hypothetical protein LOTGIDRAFT_230169 [Lottia gigantea]>gi|556115170|gb|ESP03822.1| hypothetical protein LOTGIDRAFT_230169 [Lottia gigantea]; 676428526 ref|XP_009045304.1| hypothetical protein LOTGIDRAFT_230169 [Lottia gigantea]>gi|556115170|gb|ESP03822.1| hypothetical protein LOTGIDRAFT_230169 [Lottia gigantea]; 676428541 ref|XP_009045309.1| hypothetical protein LO…	0	2	2	0.8182	0	1	1	1	702.779	1404.55	1404.55	-1.28	-0.0009	0/0	0	0	70120	HCD (High Energy Collision Dissociation)	MS2	17.2102	100	24.4572	4469	4469	4463	MCMMCM34021207.raw	F7	66	2.75	1	0.0001881	2.40x10⁻⁶	2.048
High	Sequest HT	Sequest HT (A2)	A	2	Unambiguous	KLAETETDGNGFR	KLAETETDGNGFR		3	A0A6P7T402	uncharacterized HIT-like protein Synpcc7942_1390 OS=Octopus vulgaris OX=6645 GN=LOC115219148 PE=4 SV=1	A0A6P7T402; A0A0L8FRE8; Cluster-58773.76616;orf1 len=148 frame:3 start:120 end:563 gi	uncharacterized HIT-like protein Synpcc7942_1390 OS=Octopus vulgaris OX=6645 GN=LOC115219148 PE=4 SV=1; HIT domain-containing protein OS=Octopus bimaculoides OX=37653 GN=OCBIM_22010156mg PE=4 SV=1; 645016475 ref|XP_008211498.1| PREDICTED: histidine triad nucleotide-binding protein 1 [Nasonia vitripennis]	1	3	3	0.67	0	1	1	1	479.903	1437.7	1437.7	-1.03	-0.00049	0/0	0	0	77323.5	HCD (High Energy Collision Dissociation)	MS2	31.2723	100	24.4527	4468	4468	4463	MCMMCM34021207.raw	F7	1295	2.97	1	0.0001881	2.29x10⁻⁴	1.271
High	Sequest HT	Sequest HT (A2)	A	2	Unambiguous	IQEELER	IQEELER		11	A0A6P7TDF6	unconventional myosin-VI isoform X4 OS=Octopus vulgaris OX=6645 GN=LOC115222880 PE=3 SV=1	A0A6P7TDF6; Cluster-58773.125326;orf1 len=1309 frame:3 start:33 end:3959 gi; Cluster-58773.125337;orf1 len=1227 frame:3 start:201 end:3881 gi; A0A6P7TDB7; Cluster-58773.125332;orf1 len=1036 frame:3 start:201 end:3308 gi; Cluster-58773.125331;orf1 len=1288 frame:1 start:241 end:4104 gi; A0A7E6FJK7; Cluster-58773.125329;orf1 len=1173 frame:3 start:201 end:3719 gi; A0A6P7TJ32; Cluster-58773.125328;o…	unconventional myosin-VI isoform X4 OS=Octopus vulgaris OX=6645 GN=LOC115222880 PE=3 SV=1; 762115898 ref|XP_011440764.1| PREDICTED: unconventional myosin-VI-like isoform X2 [Crassostrea gigas]; 762115898 ref|XP_011440764.1| PREDICTED: unconventional myosin-VI-like isoform X2 [Crassostrea gigas]; unconventional myosin-VI isoform X3 OS=Octopus vulgaris OX=6645 GN=LOC115222880 PE=3 SV=1; 762115902 r…	0	2	2	0.0909	0	1	1	1	458.74	916.472	916.473	-1.6	-0.00073	0/0	0	0	92713.4	HCD (High Energy Collision Dissociation)	MS2	11.1482	100	24.4481	4467	4467	4463	MCMMCM34021207.raw	F7	1203	1.98	1	0.0001881	2.26x10⁻²	0.484
High	Sequest HT	Sequest HT (A2)	A	2	Unambiguous	KDDLQHIDVQEK	KDDLQHIDVQEK		10	Cluster-58773.169829;orf1 len=170 frame:1 start:604 end:1113 gi; A0A6P7T9Z5	762093795 ref|XP_011429361.1| PREDICTED: uncharacterized protein LOC105329712 isoform X1 [Crassostrea gigas]>gi|762093797|ref|XP_011429362.1| PREDICTED: uncharacterized protein LOC105329712 isoform X1 [Crassostrea gigas]>gi|762093799|ref|XP_011429363.1| PREDICTED: uncharacterized protein LOC105329712 isoform X1 [Crassostrea gigas]>gi|405973201|gb|EKC37927.1| hypothetical protein CGI_10009700 [Cra…	Cluster-58773.169832;orf1 len=132 frame:1 start:604 end:999 sp; A0A0L8G8E3; A0A0L8G8H6; Cluster-58773.169827;orf1 len=156 frame:-3 start:469 end:2 gi; Cluster-58773.169829;orf1 len=170 frame:1 start:604 end:1113 gi; A0A0L8G8W5; A0A6P7TCQ2; A0A6P7T9Z5; A0A0L8G8W8; Cluster-58773.169826;orf1 len=118 frame:-3 start:355 end:2 gi	O17389 TYB_CAEEL Thymosin beta OS=Caenorhabditis elegans GN=tth-1 PE=1 SV=2; Uncharacterized protein OS=Octopus bimaculoides OX=37653 GN=OCBIM_22038101mg PE=3 SV=1; Uncharacterized protein OS=Octopus bimaculoides OX=37653 GN=OCBIM_22038101mg PE=3 SV=1; 762093803 ref|XP_011429365.1| PREDICTED: trichohyalin-like isoform X3 [Crassostrea gigas]; 762093795 ref|XP_011429361.1| PREDICTED: uncharacterize…	1	3	3	0.525	0	1	1	1	489.919	1467.74	1467.74	-0.23	-0.00011	0/0	0	0	351244	HCD (High Energy Collision Dissociation)	MS2	5.98018	100	24.3409	4448	4448	4441	MCMMCM34021207.raw	F7	1335	5.39	2	0.0001881	1.86x10⁻⁵	1.698
High	Sequest HT	Sequest HT (A2)	A	2	Unambiguous	SCSNPLPQCGGK	ScSNPLPQcGGK	C2(Carbamidomethyl); C9(Carbamidomethyl)	4	A0A7E6FK29; Cluster-58773.176632;orf1 len=807 frame:1 start:1 end:2421 gi	mucin-19-like OS=Octopus vulgaris OX=6645 GN=LOC115224399 PE=4 SV=1 657741131 ref|XP_008305640.1| PREDICTED: LOW QUALITY PROTEIN: SCO-spondin [Cynoglossus semilaevis]	Cluster-58773.176634;orf1 len=801 frame:1 start:1 end:2403 gi; A0A7E6FK29; Cluster-58773.176632;orf1 len=807 frame:1 start:1 end:2421 gi; A0A0L8FUW4	657741131 ref|XP_008305640.1| PREDICTED: LOW QUALITY PROTEIN: SCO-spondin [Cynoglossus semilaevis]; mucin-19-like OS=Octopus vulgaris OX=6645 GN=LOC115224399 PE=4 SV=1; 657741131 ref|XP_008305640.1| PREDICTED: LOW QUALITY PROTEIN: SCO-spondin [Cynoglossus semilaevis]; Uncharacterized protein OS=Octopus bimaculoides OX=37653 GN=OCBIM_22007338mg PE=4 SV=1	0	2	2	0.6543	0	1	1	1	652.79	1304.57	1304.57	0.28	0.00018	0/0	0	0	559025	HCD (High Energy Collision Dissociation)	MS2	0	100	24.3317	4446	4446	4441	MCMMCM34021207.raw	F7	343	2.69	2	0.0001881	2.46x10⁻⁵	1.651
High	Sequest HT	Sequest HT (A2)	A	2	Unambiguous	CPEPDAINR	cPEPDAINR	C1(Carbamidomethyl)	8	A0A6P7SER3; Q9BJ58; O61363; A0A6P7SDC4; Q5XLV2; Cluster-58773.162319;orf1 len=2921 frame:3 start:24 end:8786 gi	hemocyanin 1-like OS=Octopus vulgaris OX=6645 GN=LOC115212215 PE=4 SV=2 Hemocyanin G-type (Fragment) OS=Enteroctopus dofleini OX=267067 PE=4 SV=2 Hemocyanin G-type, units Oda to Odg OS=Enteroctopus dofleini OX=267067 GN=ODHCY PE=1 SV=1 hemocyanin G-type, units Oda to Odg OS=Octopus vulgaris OX=6645 GN=LOC115211670 PE=4 SV=2 Hemocyanin A-type (Fragment) OS=Enteroctopus dofleini OX=267067 GN=HA PE=…	A0A6P7SER3; Cluster-58773.162316;orf1 len=2526 frame:3 start:24 end:7601 gi; Q9BJ58; O61363; A0A6P7SDC4; Cluster-58773.162317;orf1 len=187 frame:-3 start:561 end:1 gi; Q5XLV2; Cluster-58773.162319;orf1 len=2921 frame:3 start:24 end:8786 gi	hemocyanin 1-like OS=Octopus vulgaris OX=6645 GN=LOC115212215 PE=4 SV=2; 16596797 gb|AAK28276.2| hemocyanin G-type [Enteroctopus dofleini]; Hemocyanin G-type (Fragment) OS=Enteroctopus dofleini OX=267067 PE=4 SV=2; Hemocyanin G-type, units Oda to Odg OS=Enteroctopus dofleini OX=267067 GN=ODHCY PE=1 SV=1; hemocyanin G-type, units Oda to Odg OS=Octopus vulgaris OX=6645 GN=LOC115211670 PE=4 SV=2; 52…	0	2	2	0.7619	0	1	1	1	536.248	1071.49	1071.49	0.77	0.00041	0/0	0	0	5.51614e+06	HCD (High Energy Collision Dissociation)	MS2	0.562672	11.089	24.3185	4442	4442	4441	MCMMCM34021207.raw	F7	474	2.73	6	0.0001881	8.18x10⁻⁴	1.054
High	Sequest HT	Sequest HT (A2)	A	2	Unambiguous	NVAVGGDSNVTNR	NVAVGGDSNVTNR		3	Cluster-58773.88819;orf1 len=208 frame:2 start:272 end:895 gi	157824041 ref|NP_001100820.1| receptor-interacting serine/threonine-protein kinase 1 [Rattus norvegicus]>gi|149045237|gb|EDL98323.1| receptor (TNFRSF)-interacting serine-threonine kinase 1 (predicted) [Rattus norvegicus]	Cluster-58773.88819;orf1 len=208 frame:2 start:272 end:895 gi; Cluster-58773.89308;orf1 len=166 frame:-2 start:498 end:1 gi; Cluster-58773.109517;orf1 len=287 frame:2 start:272 end:1132 gi	157824041 ref|NP_001100820.1| receptor-interacting serine/threonine-protein kinase 1 [Rattus norvegicus]>gi|149045237|gb|EDL98323.1| receptor (TNFRSF)-interacting serine-threonine kinase 1 (predicted) [Rattus norvegicus]; 157824041 ref|NP_001100820.1| receptor-interacting serine/threonine-protein kinase 1 [Rattus norvegicus]>gi|149045237|gb|EDL98323.1| receptor (TNFRSF)-interacting serine-threoni…	0	2	2	0.4872	0	1	1	1	651.824	1302.64	1302.64	0.45	0.00029	0/0	0	0	175650	HCD (High Energy Collision Dissociation)	MS2	0	100	24.2209	4425	4425	4419	MCMMCM34021207.raw	F7	1148	2.34	1	0.0001881	7.89x10⁻⁴	1.06
High	Sequest HT	Sequest HT (A2)	A	2	Unambiguous	NVPQEVTAEK	NVPQEVTAEK		4	A0A6P7SD80	nucleolin isoform X3 OS=Octopus vulgaris OX=6645 GN=LOC115211796 PE=4 SV=1	A0A6P7SD80; A0A7E6EUV8; A0A6P7SDX1; A0A6P7SEA6	nucleolin isoform X3 OS=Octopus vulgaris OX=6645 GN=LOC115211796 PE=4 SV=1; nucleolin isoform X2 OS=Octopus vulgaris OX=6645 GN=LOC115211796 PE=4 SV=1; nucleolin isoform X4 OS=Octopus vulgaris OX=6645 GN=LOC115211796 PE=4 SV=1; nucleolin isoform X1 OS=Octopus vulgaris OX=6645 GN=LOC115211796 PE=4 SV=1	0	2	2	0.4891	0	1	1	1	557.789	1114.57	1114.57	-1.99	-0.00111	0/0	0	0	159230	HCD (High Energy Collision Dissociation)	MS2	58.699	100	24.1568	4413	4413	4408	MCMMCM34021207.raw	F7	1016	1.84	1	0.0001881	4.00x10⁻³	0.783
High	Sequest HT	Sequest HT (A2)	A	2	Unambiguous	ITSDLEGHPTPR	ITSDLEGHPTPR		5	A0A6P7SAW7	transketolase OS=Octopus vulgaris OX=6645 GN=LOC115210747 PE=4 SV=1	A0A0L8HW75; A0A6P7SAW7; Cluster-58773.128728;orf1 len=632 frame:1 start:466 end:2361 gi; Cluster-58773.184718;orf1 len=122 frame:-3 start:368 end:3 gi; A0A812C842	Transket_pyr domain-containing protein (Fragment) OS=Octopus bimaculoides OX=37653 GN=OCBIM_22004337mg PE=4 SV=1; transketolase OS=Octopus vulgaris OX=6645 GN=LOC115210747 PE=4 SV=1; 762090756 ref|XP_011427761.1| PREDICTED: transketolase-like protein 2 isoform X1 [Crassostrea gigas]; 762090756 ref|XP_011427761.1| PREDICTED: transketolase-like protein 2 isoform X1 [Crassostrea gigas]; E2.2.1.1 OS=…	0	3	3	0.5927	0	1	1	1	441.561	1322.67	1322.67	-0.79	-0.00035	0/0	0	0	199167	HCD (High Energy Collision Dissociation)	MS2	23.7868	100	24.1477	4411	4411	4408	MCMMCM34021207.raw	F7	1443	3.02	1	0.0001881	3.85x10⁻⁵	1.575
High	Sequest HT	Sequest HT (A2)	A	2	Unambiguous	CITEEQCPCEYNGKK	cITEEQcPcEYNGKK	C1(Carbamidomethyl); C7(Carbamidomethyl); C9(Carbamidomethyl)	2	Cluster-123723.0;orf1 len=1033 frame:2 start:2 end:3100 gi; A0A7E6FK29	762085926 ref|XP_011425282.1| PREDICTED: mucin-17-like [Crassostrea gigas] mucin-19-like OS=Octopus vulgaris OX=6645 GN=LOC115224399 PE=4 SV=1	Cluster-123723.0;orf1 len=1033 frame:2 start:2 end:3100 gi; A0A7E6FK29	762085926 ref|XP_011425282.1| PREDICTED: mucin-17-like [Crassostrea gigas]; mucin-19-like OS=Octopus vulgaris OX=6645 GN=LOC115224399 PE=4 SV=1	1	3	3	0.6642	0	1	1	1	639.271	1915.8	1915.8	-0.31	-0.0002	0/0	0	0	68004.1	HCD (High Energy Collision Dissociation)	MS2	13.6824	100	23.9358	4373	4373	4364	MCMMCM34021207.raw	F7	156	2.65	2	0.0001881	5.99x10⁻⁵	1.499
High	Sequest HT	Sequest HT (A2)	A	2	Unambiguous	LAQNITEEQGK	LAQNITEEQGK		2	A0A6P7SWF0	probable methylmalonate-semialdehyde dehydrogenase [acylating], mitochondrial OS=Octopus vulgaris OX=6645 GN=LOC115217127 PE=3 SV=1	A0A6P7SWF0; Cluster-58773.166559;orf1 len=545 frame:2 start:281 end:1915 gi	probable methylmalonate-semialdehyde dehydrogenase [acylating], mitochondrial OS=Octopus vulgaris OX=6645 GN=LOC115217127 PE=3 SV=1; 762113492 ref|XP_011439505.1| PREDICTED: probable methylmalonate-semialdehyde dehydrogenase [acylating], mitochondrial [Crassostrea gigas]>gi|405970294|gb|EKC35210.1| Putative methylmalonate-semialdehyde dehydrogenase [acylating], mitochondrial [Crassostrea gigas]	0	2	2	0.3562	0	1	1	1	615.82	1230.63	1230.63	-0.13	-8e-05	0/0	0	0	84688.9	HCD (High Energy Collision Dissociation)	MS2	25.0176	100	23.922	4370	4370	4364	MCMMCM34021207.raw	F7	1509	2.19	1	0.0001881	3.26x10⁻⁴	1.211
High	Sequest HT	Sequest HT (A2)	A	2	Unambiguous	LNDPSGVAAR	LNDPSGVAAR		2	Cluster-58773.155036;orf1 len=454 frame:1 start:1 end:1362 gi	676495464 ref|XP_009066900.1| hypothetical protein LOTGIDRAFT_134745 [Lottia gigantea]>gi|556093743|gb|ESO82396.1| hypothetical protein LOTGIDRAFT_134745 [Lottia gigantea]	Cluster-58773.155036;orf1 len=454 frame:1 start:1 end:1362 gi; A0A6P7U0U0	676495464 ref|XP_009066900.1| hypothetical protein LOTGIDRAFT_134745 [Lottia gigantea]>gi|556093743|gb|ESO82396.1| hypothetical protein LOTGIDRAFT_134745 [Lottia gigantea]; collagen alpha-1(XII) chain OS=Octopus vulgaris OX=6645 GN=LOC115229655 PE=4 SV=2	0	2	2	0.432	0	1	1	1	500.264	999.521	999.522	-0.45	-0.00023	0/0	0	0	123146	HCD (High Energy Collision Dissociation)	MS2	39.9827	100	23.8743	4362	4362	4353	MCMMCM34021207.raw	F7	870	3.31	1	0.0001881	1.18x10⁻⁴	1.384
High	Sequest HT	Sequest HT (A2)	A	2	Unambiguous	ATGIVTGGPYHSK	ATGIVTGGPYHSK		3	A0A6P7SA56	cathepsin B OS=Octopus vulgaris OX=6645 GN=LOC115210644 PE=3 SV=1	A0A6P7SA56; Cluster-58773.153413;orf1 len=355 frame:2 start:395 end:1459 gi; Cluster-58773.153412;orf1 len=248 frame:2 start:395 end:1138 gi	cathepsin B OS=Octopus vulgaris OX=6645 GN=LOC115210644 PE=3 SV=1; 443692853 gb|ELT94358.1| hypothetical protein CAPTEDRAFT_221292 [Capitella teleta]; 675882824 ref|XP_009026914.1| hypothetical protein HELRODRAFT_186015 [Helobdella robusta]>gi|555691789|gb|ESN95021.1| hypothetical protein HELRODRAFT_186015 [Helobdella robusta]	0	3	3	0.4613	0	1	1	1	429.895	1287.67	1287.67	0	0	0/0	0	0	480757	HCD (High Energy Collision Dissociation)	MS2	20.6268	100	23.7922	4346	4346	4342	MCMMCM34021207.raw	F7	1438	3.62	1	0.0001881	3.50x10⁻⁵	1.591
High	Sequest HT	Sequest HT (A2)	A	2	Unambiguous	QNFNENNVNPK	QNFNENNVNPK		2	Cluster-58773.129918;orf1 len=663 frame:2 start:497 end:2485 gi	676453947 ref|XP_009053520.1| hypothetical protein LOTGIDRAFT_203811 [Lottia gigantea]>gi|556107015|gb|ESO95667.1| hypothetical protein LOTGIDRAFT_203811 [Lottia gigantea]	Cluster-58773.180394;orf1 len=79 frame:-2 start:239 end:3 gi; Cluster-58773.129918;orf1 len=663 frame:2 start:497 end:2485 gi	514698432 ref|XP_004996785.1| hypothetical protein PTSG_02296 [Salpingoeca rosetta]>gi|326436011|gb|EGD81581.1| hypothetical protein PTSG_02296 [Salpingoeca rosetta]; 676453947 ref|XP_009053520.1| hypothetical protein LOTGIDRAFT_203811 [Lottia gigantea]>gi|556107015|gb|ESO95667.1| hypothetical protein LOTGIDRAFT_203811 [Lottia gigantea]	0	2	2	0.5426	0	1	1	1	659.314	1317.62	1317.62	1.53	0.00101	0/0	0	0	1.80584e+06	HCD (High Energy Collision Dissociation)	MS2	1.34157	37.675	23.781	4343	4343	4342	MCMMCM34021207.raw	F7	794	2.58	1	0.0001881	1.89x10⁻³	0.911
High	Sequest HT	Sequest HT (A2)	A	2	Unambiguous	NVDSLDER	NVDSLDER		4	A0A6P7SER3; A0A6P7SDC4; Cluster-58773.162319;orf1 len=2921 frame:3 start:24 end:8786 gi	hemocyanin 1-like OS=Octopus vulgaris OX=6645 GN=LOC115212215 PE=4 SV=2 hemocyanin G-type, units Oda to Odg OS=Octopus vulgaris OX=6645 GN=LOC115211670 PE=4 SV=2 16596797 gb|AAK28276.2| hemocyanin G-type [Enteroctopus dofleini]	A0A6P7SER3; Cluster-58773.162316;orf1 len=2526 frame:3 start:24 end:7601 gi; A0A6P7SDC4; Cluster-58773.162319;orf1 len=2921 frame:3 start:24 end:8786 gi	hemocyanin 1-like OS=Octopus vulgaris OX=6645 GN=LOC115212215 PE=4 SV=2; 16596797 gb|AAK28276.2| hemocyanin G-type [Enteroctopus dofleini]; hemocyanin G-type, units Oda to Odg OS=Octopus vulgaris OX=6645 GN=LOC115211670 PE=4 SV=2; 16596797 gb|AAK28276.2| hemocyanin G-type [Enteroctopus dofleini]	0	2	2	0.311	0	1	1	1	474.225	947.443	947.443	-0.07	-3e-05	0/0	0	0	238914	HCD (High Energy Collision Dissociation)	MS2	20.8631	100	23.7382	4336	4336	4331	MCMMCM34021207.raw	F7	785	1.64	3	0.0001881	1.11x10⁻²	0.607
High	Sequest HT	Sequest HT (A2)	A	2	Unambiguous	ALQAYEDDK	ALQAYEDDK		7	A0A6P7SER3; Q9BJ58; O61363; A0A6P7SDC4; Q5XLV2; Cluster-58773.162319;orf1 len=2921 frame:3 start:24 end:8786 gi	hemocyanin 1-like OS=Octopus vulgaris OX=6645 GN=LOC115212215 PE=4 SV=2 Hemocyanin G-type (Fragment) OS=Enteroctopus dofleini OX=267067 PE=4 SV=2 Hemocyanin G-type, units Oda to Odg OS=Enteroctopus dofleini OX=267067 GN=ODHCY PE=1 SV=1 hemocyanin G-type, units Oda to Odg OS=Octopus vulgaris OX=6645 GN=LOC115211670 PE=4 SV=2 Hemocyanin A-type (Fragment) OS=Enteroctopus dofleini OX=267067 GN=HA PE=…	A0A6P7SER3; Cluster-58773.162316;orf1 len=2526 frame:3 start:24 end:7601 gi; Q9BJ58; O61363; A0A6P7SDC4; Q5XLV2; Cluster-58773.162319;orf1 len=2921 frame:3 start:24 end:8786 gi	hemocyanin 1-like OS=Octopus vulgaris OX=6645 GN=LOC115212215 PE=4 SV=2; 16596797 gb|AAK28276.2| hemocyanin G-type [Enteroctopus dofleini]; Hemocyanin G-type (Fragment) OS=Enteroctopus dofleini OX=267067 PE=4 SV=2; Hemocyanin G-type, units Oda to Odg OS=Enteroctopus dofleini OX=267067 GN=ODHCY PE=1 SV=1; hemocyanin G-type, units Oda to Odg OS=Octopus vulgaris OX=6645 GN=LOC115211670 PE=4 SV=2; He…	0	2	2	0.2596	0	1	1	1	526.75	1052.49	1052.49	2.15	0.00113	0/0	0	0	3.83896e+06	HCD (High Energy Collision Dissociation)	MS2	1.00304	15.596	24.5563	4486	4486	4485	MCMMCM34021207.raw	F7	857	2.08	6	0.0001881	2.22x10⁻²	0.487
High	Sequest HT	Sequest HT (A2)	A	2	Unambiguous	TDHLNGEVEAEGCESR	TDHLNGEVEAEGcESR	C13(Carbamidomethyl)	2	A0A6P7TRP1	uncharacterized protein LOC115224795 isoform X1 OS=Octopus vulgaris OX=6645 GN=LOC115224795 PE=4 SV=1	A0A6P7TRP1; A0A6P7TQE7	uncharacterized protein LOC115224795 isoform X1 OS=Octopus vulgaris OX=6645 GN=LOC115224795 PE=4 SV=1; uncharacterized protein LOC115224795 isoform X2 OS=Octopus vulgaris OX=6645 GN=LOC115224795 PE=4 SV=1	0	3	3	0.7173	0	1	1	1	601.592	1802.76	1802.76	0.34	0.0002	0/0	0	0	98773.5	HCD (High Energy Collision Dissociation)	MS2	16.3413	100	24.5777	4491	4491	4485	MCMMCM34021207.raw	F7	239	3.36	1	0.0001881	7.00x10⁻⁵	1.473
High	Sequest HT	Sequest HT (A2)	A	2	Unambiguous	LHAHDDFEIK	LHAHDDFEIK		2	A0A6P7SDC4; Cluster-58773.162319;orf1 len=2921 frame:3 start:24 end:8786 gi	hemocyanin G-type, units Oda to Odg OS=Octopus vulgaris OX=6645 GN=LOC115211670 PE=4 SV=2 16596797 gb|AAK28276.2| hemocyanin G-type [Enteroctopus dofleini]	A0A6P7SDC4; Cluster-58773.162319;orf1 len=2921 frame:3 start:24 end:8786 gi	hemocyanin G-type, units Oda to Odg OS=Octopus vulgaris OX=6645 GN=LOC115211670 PE=4 SV=2; 16596797 gb|AAK28276.2| hemocyanin G-type [Enteroctopus dofleini]	0	3	3	0.3761	0	1	1	1	408.873	1224.6	1224.6	2.43	0.00099	0/0	0	0	4025161	HCD (High Energy Collision Dissociation)	MS2	2.41824	10.257	24.9105	4552	4552	4551	MCMMCM34021207.raw	F7	1252	2.34	2	0.0001881	2.23x10⁻²	0.487
High	Sequest HT	Sequest HT (A2)	A	2	Unambiguous	LHAHDDFEIK	LHAHDDFEIK		2	A0A6P7SDC4; Cluster-58773.162319;orf1 len=2921 frame:3 start:24 end:8786 gi	hemocyanin G-type, units Oda to Odg OS=Octopus vulgaris OX=6645 GN=LOC115211670 PE=4 SV=2 16596797 gb|AAK28276.2| hemocyanin G-type [Enteroctopus dofleini]	A0A6P7SDC4; Cluster-58773.162319;orf1 len=2921 frame:3 start:24 end:8786 gi	hemocyanin G-type, units Oda to Odg OS=Octopus vulgaris OX=6645 GN=LOC115211670 PE=4 SV=2; 16596797 gb|AAK28276.2| hemocyanin G-type [Enteroctopus dofleini]	0	2	2	0.4919	0	1	1	1	612.804	1224.6	1224.6	-0.72	-0.00044	0/0	0	0	275838	HCD (High Energy Collision Dissociation)	MS2	29.2029	100	24.9305	4557	4557	4551	MCMMCM34021207.raw	F7	1211	3.07	2	0.0001881	2.45x10⁻⁴	1.259
High	Sequest HT	Sequest HT (A2)	A	2	Unambiguous	KSIFVDSRPGVAK	KSIFVDSRPGVAK		5	Cluster-58773.124587;orf1 len=492 frame:3 start:93 end:1568 gi; A0A6P7U678	871246464 ref|XP_012940508.1| PREDICTED: uncharacterized protein LOC101848762 [Aplysia californica] collagen alpha-4(VI) chain OS=Octopus vulgaris OX=6645 GN=LOC115232146 PE=4 SV=2	Cluster-58773.124588;orf1 len=479 frame:3 start:93 end:1529 gi; Cluster-58773.124584;orf1 len=475 frame:3 start:93 end:1517 gi; Cluster-58773.124583;orf1 len=167 frame:-2 start:502 end:2 gi; Cluster-58773.124587;orf1 len=492 frame:3 start:93 end:1568 gi; A0A6P7U678	676495464 ref|XP_009066900.1| hypothetical protein LOTGIDRAFT_134745 [Lottia gigantea]>gi|556093743|gb|ESO82396.1| hypothetical protein LOTGIDRAFT_134745 [Lottia gigantea]; 676495464 ref|XP_009066900.1| hypothetical protein LOTGIDRAFT_134745 [Lottia gigantea]>gi|556093743|gb|ESO82396.1| hypothetical protein LOTGIDRAFT_134745 [Lottia gigantea]; 405962703 gb|EKC28354.1| Collagen alpha-1(XII) chain …	1	3	3	0.5015	0	1	1	1	468.606	1403.8	1403.8	2.5	0.00117	0/0	0	0	179260	HCD (High Energy Collision Dissociation)	MS2	30.9803	100	25.7051	4699	4699	4694	MCMMCM34021207.raw	F7	705	3.27	2	0.0001881	2.50x10⁻³	0.863
High	Sequest HT	Sequest HT (A2)	A	2	Unambiguous	VCYDKDFCSK	VcYDKDFcSK	C2(Carbamidomethyl); C8(Carbamidomethyl)	5	A0A7E6EVN8	mucin-like protein OS=Octopus vulgaris OX=6645 GN=LOC115213503 PE=4 SV=1	Cluster-58773.84428;orf1 len=1302 frame:1 start:1 end:3906 gi; A0A7E6EVN8; Cluster-58773.84427;orf2 len=1057 frame:1 start:1 end:3171 gi; Cluster-58773.84430;orf1 len=1319 frame:1 start:1 end:3957 gi; Cluster-58773.84429;orf1 len=1366 frame:1 start:1 end:4098 gi	847132402 ref|XP_012819335.1| PREDICTED: mucin-like protein [Xenopus (Silurana) tropicalis]; mucin-like protein OS=Octopus vulgaris OX=6645 GN=LOC115213503 PE=4 SV=1; 313240015 emb|CBY32374.1| unnamed protein product [Oikopleura dioica]; 847132402 ref|XP_012819335.1| PREDICTED: mucin-like protein [Xenopus (Silurana) tropicalis]; 847132402 ref|XP_012819335.1| PREDICTED: mucin-like protein [Xenopus…	1	3	3	0.486	0	1	1	1	441.191	1321.56	1321.56	1.79	0.00079	0/0	0	0	432247	HCD (High Energy Collision Dissociation)	MS2	15.7558	97.283	25.6868	4695	4695	4694	MCMMCM34021207.raw	F7	243	2.14	1	0.0001881	2.00x10⁻³	0.902
High	Sequest HT	Sequest HT (A2)	A	2	Unambiguous	VCGLPEGK	VcGLPEGK	C2(Carbamidomethyl)	40	A0A7E6F8D1	neuroblast differentiation-associated protein AHNAK isoform X37 OS=Octopus vulgaris OX=6645 GN=LOC115218249 PE=4 SV=1	Cluster-58773.139724;orf1 len=194 frame:-2 start:582 end:1 gi; A0A7E6F8D1; A0A7E6F8A2; A0A7E6F8A6; A0A6P7T0A6; A0A7E6F9S0; A0A7E6F8C0; A0A6P7T0F8; A0A7E6F8A7; A0A6P7SZQ0; A0A7E6F8B0; A0A7E6F8B7; A0A7E6F9R5; A0A7E6F9R0; A0A7E6FAM6; A0A7E6FAN6; Cluster-58773.139708;orf1 len=152 frame:2 start:2 end:457 gi; A0A7E6F8C9; A0A6P7SZP6; A0A7E6F8B2; A0A7E6F9Q4; A0A7E6F8Z4; A0A7E6F8C3; A0A7E6F9P9; A0A7E6FAN1…	478255399 gb|ENN75621.1| hypothetical protein YQE_07799, partial [Dendroctonus ponderosae]; neuroblast differentiation-associated protein AHNAK isoform X37 OS=Octopus vulgaris OX=6645 GN=LOC115218249 PE=4 SV=1; neuroblast differentiation-associated protein AHNAK isoform X4 OS=Octopus vulgaris OX=6645 GN=LOC115218249 PE=4 SV=1; uncharacterized protein LOC115218249 isoform X9 OS=Octopus vulgaris OX…	0	2	2	0.5108	0	1	1	1	430.222	859.436	859.434	2.06	0.00088	0/0	0	0	154518	HCD (High Energy Collision Dissociation)	MS2	40.3556	100	25.6543	4690	4690	4683	MCMMCM34021207.raw	F7	863	1.86	1	0.0001881	4.56x10⁻³	0.76
High	Sequest HT	Sequest HT (A2)	A	2	Unambiguous	EADEPALAR	EADEPALAR		3	Cluster-58773.181383;orf1 len=2076 frame:2 start:398 end:6625 gi	762115637 ref|XP_011440628.1| PREDICTED: uncharacterized protein LOC105337560 isoform X1 [Crassostrea gigas]	A0A7E6EZI8; Cluster-58773.181383;orf1 len=2076 frame:2 start:398 end:6625 gi; Cluster-58773.181380;orf1 len=1796 frame:2 start:1430 end:6817 gi	uncharacterized protein LOC115214248 OS=Octopus vulgaris OX=6645 GN=LOC115214248 PE=4 SV=1; 762115637 ref|XP_011440628.1| PREDICTED: uncharacterized protein LOC105337560 isoform X1 [Crassostrea gigas]; 762115645 ref|XP_011440632.1| PREDICTED: uncharacterized protein LOC105337560 isoform X5 [Crassostrea gigas]	0	2	2	0.6512	0	1	1	1	486.244	971.482	971.479	2.34	0.00114	0/0	0	0	213164	HCD (High Energy Collision Dissociation)	MS2	28.6181	100	25.6405	4687	4687	4683	MCMMCM34021207.raw	F7	784	2.15	1	0.0001881	6.59x10⁻⁴	1.091
High	Sequest HT	Sequest HT (A2)	A	2	Unambiguous	NPLPDKDTIK	NPLPDKDTIK		10	Cluster-58773.169829;orf1 len=170 frame:1 start:604 end:1113 gi; A0A6P7T9Z5	762093795 ref|XP_011429361.1| PREDICTED: uncharacterized protein LOC105329712 isoform X1 [Crassostrea gigas]>gi|762093797|ref|XP_011429362.1| PREDICTED: uncharacterized protein LOC105329712 isoform X1 [Crassostrea gigas]>gi|762093799|ref|XP_011429363.1| PREDICTED: uncharacterized protein LOC105329712 isoform X1 [Crassostrea gigas]>gi|405973201|gb|EKC37927.1| hypothetical protein CGI_10009700 [Cra…	Cluster-58773.169832;orf1 len=132 frame:1 start:604 end:999 sp; A0A0L8G8E3; A0A0L8G8H6; Cluster-58773.169827;orf1 len=156 frame:-3 start:469 end:2 gi; Cluster-58773.169829;orf1 len=170 frame:1 start:604 end:1113 gi; A0A0L8G8W5; A0A6P7TCQ2; A0A6P7T9Z5; A0A0L8G8W8; Cluster-58773.169826;orf1 len=118 frame:-3 start:355 end:2 gi	O17389 TYB_CAEEL Thymosin beta OS=Caenorhabditis elegans GN=tth-1 PE=1 SV=2; Uncharacterized protein OS=Octopus bimaculoides OX=37653 GN=OCBIM_22038101mg PE=3 SV=1; Uncharacterized protein OS=Octopus bimaculoides OX=37653 GN=OCBIM_22038101mg PE=3 SV=1; 762093803 ref|XP_011429365.1| PREDICTED: trichohyalin-like isoform X3 [Crassostrea gigas]; 762093795 ref|XP_011429361.1| PREDICTED: uncharacterize…	1	2	2	0.4011	0	1	1	1	570.817	1140.63	1140.63	0.15	8e-05	0/0	0	0	248468	HCD (High Energy Collision Dissociation)	MS2	11.8572	100	25.5699	4674	4674	4672	MCMMCM34021207.raw	F7	836	1.87	2	0.0001881	5.15x10⁻³	0.739
High	Sequest HT	Sequest HT (A2)	A	2	Unambiguous	AGFAGDDAPR	AGFAGDDAPR		24	A0A6P7SM13; I0JGT9	actin, cytoplasmic OS=Octopus vulgaris OX=6645 GN=LOC115214121 PE=3 SV=1 Actin I OS=Sepia officinalis OX=6610 GN=ACTI PE=2 SV=1	I0JGU0; Cluster-659.0;orf1 len=379 frame:3 start:45 end:1181 gi; A0A6P7SKQ4; Cluster-382.0;orf1 len=114 frame:-3 start:342 end:1 gi; F1ADJ3; A0A0L8GIS9; D3GBA7; Cluster-58773.158538;orf1 len=73 frame:1 start:463 end:681 gi; A4D0I0; F1ADJ2; Cluster-116978.7;orf1 len=236 frame:-3 start:710 end:3 gi; A0A6P7SM13; G3LVJ6; A0A812CKE2; D3GBA8; A0A812C079; A0A2S1FRU5; A0A0L8G4I0; A0A6P7U7B8; D2YZ90; Clus…	Actin II OS=Sepia officinalis OX=6610 GN=ACTII PE=2 SV=1; 10304437 gb|AAG16253.1|AF300705_1 beta-actin [Litopenaeus vannamei]>gi|13647003|dbj|BAB41102.1| actin [Marsupenaeus japonicus]>gi|34576243|emb|CAE46725.1| beta actin [Homarus gammarus]>gi|51472040|gb|AAU04441.1| beta-actin [Macrobrachium rosenbergii]>gi|68138000|gb|AAY85815.1| beta-actin [Callinectes sapidus]>gi|77955978|gb|ABB05541.1| bet…	0	2	2	0.5622	0	1	1	1	488.729	976.45	976.448	2.21	0.00108	0/0	0	0	2.11385e+06	HCD (High Energy Collision Dissociation)	MS2	2.08702	28.472	25.5667	4673	4673	4672	MCMMCM34021207.raw	F7	713	2.49	2	0.0001881	2.31x10⁻⁴	1.269
High	Sequest HT	Sequest HT (A2)	A	2	Unambiguous	DADMAPVDK	DADMAPVDK		5	A0A6P7SER3; A0A6P7SDC4; Cluster-58773.162319;orf1 len=2921 frame:3 start:24 end:8786 gi	hemocyanin 1-like OS=Octopus vulgaris OX=6645 GN=LOC115212215 PE=4 SV=2 hemocyanin G-type, units Oda to Odg OS=Octopus vulgaris OX=6645 GN=LOC115211670 PE=4 SV=2 16596797 gb|AAK28276.2| hemocyanin G-type [Enteroctopus dofleini]	A0A6P7SER3; Cluster-58773.162316;orf1 len=2526 frame:3 start:24 end:7601 gi; A0A6P7SDC4; Cluster-58773.162317;orf1 len=187 frame:-3 start:561 end:1 gi; Cluster-58773.162319;orf1 len=2921 frame:3 start:24 end:8786 gi	hemocyanin 1-like OS=Octopus vulgaris OX=6645 GN=LOC115212215 PE=4 SV=2; 16596797 gb|AAK28276.2| hemocyanin G-type [Enteroctopus dofleini]; hemocyanin G-type, units Oda to Odg OS=Octopus vulgaris OX=6645 GN=LOC115211670 PE=4 SV=2; 52550954 gb|AAU84460.1| hemocyanin A-type [Enteroctopus dofleini]; 16596797 gb|AAK28276.2| hemocyanin G-type [Enteroctopus dofleini]	0	2	2	0.6099	0	1	1	1	481.219	961.43	961.43	0.87	0.00042	0/0	0	0	188950	HCD (High Energy Collision Dissociation)	MS2	43.2083	100	25.5193	4665	4665	4661	MCMMCM34021207.raw	F7	394	1.82	3	0.0001881	3.98x10⁻³	0.784
High	Sequest HT	Sequest HT (A2)	A	2	Unambiguous	IVTETHEQWEK	IVTETHEQWEK		4	A0A6P7SIX4	Inorganic diphosphatase OS=Octopus vulgaris OX=6645 GN=LOC115213471 PE=3 SV=2	Cluster-58773.174399;orf1 len=476 frame:3 start:30 end:1457 gi; A0A6P7SIX4; A0A0L8HPX8; Cluster-58773.174398;orf1 len=474 frame:3 start:30 end:1451 gi	762094182 ref|XP_011429567.1| PREDICTED: inorganic pyrophosphatase-like isoform X2 [Crassostrea gigas]; Inorganic diphosphatase OS=Octopus vulgaris OX=6645 GN=LOC115213471 PE=3 SV=2; Inorganic diphosphatase OS=Octopus bimaculoides OX=37653 GN=OCBIM_22009426mg PE=3 SV=1; 762094182 ref|XP_011429567.1| PREDICTED: inorganic pyrophosphatase-like isoform X2 [Crassostrea gigas]	0	3	3	0.3059	0	1	1	1	467.234	1399.69	1399.69	1.38	0.00064	0/0	0	0	196563	HCD (High Energy Collision Dissociation)	MS2	33.4164	100	25.5147	4664	4664	4661	MCMMCM34021207.raw	F7	1103	2.55	1	0.0001881	3.98x10⁻⁴	1.177
High	Sequest HT	Sequest HT (A2)	A	2	Unambiguous	FADENFHEK	FADENFHEK		2	Cluster-58773.150806;orf1 len=206 frame:3 start:1683 end:2300 gi	700589070 gb|AIU94796.1| hypothetical protein [Phragmatopoma lapidosa]	Cluster-58773.150799;orf1 len=182 frame:-2 start:631 end:86 gi; Cluster-58773.150806;orf1 len=206 frame:3 start:1683 end:2300 gi	700589070 gb|AIU94796.1| hypothetical protein [Phragmatopoma lapidosa]; 700589070 gb|AIU94796.1| hypothetical protein [Phragmatopoma lapidosa]	0	2	2	0.5663	0	1	1	1	568.753	1136.5	1136.5	-0.97	-0.00055	0/0	0	0	485124	HCD (High Energy Collision Dissociation)	MS2	2.08717	100	23.6219	4314	4314	4309	MCMMCM34021207.raw	F7	435	2.79	1	0.0001881	1.78x10⁻³	0.922
High	Sequest HT	Sequest HT (A2)	A	2	Unambiguous	AEANISNNEVAGTAK	AEANISNNEVAGTAK		7	A0A7E6EXY1	Na(+)/H(+) exchange regulatory cofactor NHE-RF3 isoform X2 OS=Octopus vulgaris OX=6645 GN=LOC115212804 PE=4 SV=1	A0A7E6EXY1; A0A7E6EWS6; A0A7E6EW22; Cluster-58773.180046;orf1 len=429 frame:3 start:717 end:2003 gi; A0A7E6EWX8; A0A6P7SG68; A0A7E6EYL1	Na(+)/H(+) exchange regulatory cofactor NHE-RF3 isoform X2 OS=Octopus vulgaris OX=6645 GN=LOC115212804 PE=4 SV=1; caldesmon isoform X6 OS=Octopus vulgaris OX=6645 GN=LOC115212804 PE=4 SV=1; Na(+)/H(+) exchange regulatory cofactor NHE-RF1 isoform X3 OS=Octopus vulgaris OX=6645 GN=LOC115212804 PE=4 SV=1; 762161704 ref|XP_011419089.1| PREDICTED: Na(+)/H(+) exchange regulatory cofactor NHE-RF2-like i…	0	2	2	0.6373	0	1	1	1	744.87	1488.73	1488.73	2.25	0.00167	0/0	0	0	209986	HCD (High Energy Collision Dissociation)	MS2	0	100	25.5101	4663	4663	4661	MCMMCM34021207.raw	F7	1217	2.84	1	0.0001881	7.45x10⁻⁶	1.855
High	Sequest HT	Sequest HT (A2)	A	2	Unambiguous	YVQITESSK	YVQITESSK		5	Cluster-58773.156870;orf1 len=585 frame:-2 start:1926 end:172 gi	159741 gb|AAA16613.1| omega-crystallin [Enteroctopus dofleini]	Cluster-58773.156870;orf1 len=585 frame:-2 start:1926 end:172 gi; Cluster-58773.156874;orf1 len=588 frame:-2 start:1772 end:9 gi; A0A0L8GZ15; Cluster-58773.156869;orf1 len=100 frame:1 start:1 end:300 gi; Cluster-58773.156873;orf1 len=489 frame:3 start:3 end:1469 gi	159741 gb|AAA16613.1| omega-crystallin [Enteroctopus dofleini]; 159741 gb|AAA16613.1| omega-crystallin [Enteroctopus dofleini]; IF rod domain-containing protein OS=Octopus bimaculoides OX=37653 GN=OCBIM_22025453mg PE=3 SV=1; 159741 gb|AAA16613.1| omega-crystallin [Enteroctopus dofleini]; 159741 gb|AAA16613.1| omega-crystallin [Enteroctopus dofleini]	0	2	2	0.4975	0	1	1	1	527.775	1054.54	1054.54	1.38	0.00073	0/0	0	0	170776	HCD (High Energy Collision Dissociation)	MS2	51.539	100	25.4558	4653	4653	4650	MCMMCM34021207.raw	F7	1018	2.03	1	0.0001881	1.07x10⁻²	0.613
High	Sequest HT	Sequest HT (A2)	A	2	Unambiguous	FDHDTFNAR	FDHDTFNAR		3	Cluster-58773.2496;orf1 len=295 frame:2 start:2 end:886 gi	676455373 ref|XP_009053984.1| hypothetical protein LOTGIDRAFT_160631 [Lottia gigantea]>gi|556106826|gb|ESO95478.1| hypothetical protein LOTGIDRAFT_160631 [Lottia gigantea]	Cluster-58773.2496;orf1 len=295 frame:2 start:2 end:886 gi; Cluster-58773.2499;orf1 len=237 frame:2 start:2 end:712 gi; A0A6P7SVH9	676455373 ref|XP_009053984.1| hypothetical protein LOTGIDRAFT_160631 [Lottia gigantea]>gi|556106826|gb|ESO95478.1| hypothetical protein LOTGIDRAFT_160631 [Lottia gigantea]; 667299696 ref|XP_008580716.1| PREDICTED: cysteine-rich secretory protein 3 [Galeopterus variegatus]; cysteine-rich venom protein Mr30-like OS=Octopus vulgaris OX=6645 GN=LOC115216793 PE=4 SV=1	0	2	2	0.4696	0	1	1	1	561.752	1122.5	1122.5	1.19	0.00067	0/0	0	0	391149	HCD (High Energy Collision Dissociation)	MS2	24.8336	100	25.3854	4640	4640	4639	MCMMCM34021207.raw	F7	473	2.3	1	0.0001881	1.33x10⁻³	0.971
High	Sequest HT	Sequest HT (A2)	A	2	Unambiguous	YQHKTGSFSAFGER	YQHKTGSFSAFGER		2	A0A6P7SI10	CD109 antigen isoform X2 OS=Octopus vulgaris OX=6645 GN=LOC115213260 PE=4 SV=1	A0A6P7SI10; A0A7E6F3R1	CD109 antigen isoform X2 OS=Octopus vulgaris OX=6645 GN=LOC115213260 PE=4 SV=1; CD109 antigen isoform X1 OS=Octopus vulgaris OX=6645 GN=LOC115213260 PE=4 SV=1	1	3	3	0.612	0	1	1	1	538.928	1614.77	1614.77	1.84	0.00099	0/0	0	0	315743	HCD (High Energy Collision Dissociation)	MS2	3.35417	100	25.3288	4630	4630	4628	MCMMCM34021207.raw	F7	1035	4.15	1	0.0001881	6.42x10⁻⁶	1.88
High	Sequest HT	Sequest HT (A2)	A	2	Unambiguous	YRPGTVALR	YRPGTVALR		50	A0A6P7SQ67	uncharacterized protein LOC115215397 OS=Octopus vulgaris OX=6645 GN=LOC115215397 PE=3 SV=1	Q5MX22; A0A6P7SVI4; Cluster-81277.0;orf1 len=139 frame:-2 start:706 end:290 sp; Cluster-58773.26715;orf1 len=140 frame:3 start:39 end:458 sp; Q5MX07; Q5MWZ8; D7EZU9; Q5MX33; A0A0L8GSD4; A0A6P7SQG2; D7EZW8; Q5MX34; A0A0L8HTS6; Q5MX13; A0A6M8QC49; D7EZY6; D7EZY4; D7EZX5; Q5MX16; D7EZV8; Q5MX01; D7EZX6; Q6TXP9; Cluster-58773.162037;orf1 len=139 frame:1 start:3163 end:3579 gi; A0A0L8HRS2; Q5MX21; D7E…	Histone H3 (Fragment) OS=Sepioteuthis lessoniana OX=34570 PE=3 SV=1; Histone H3 OS=Octopus vulgaris OX=6645 GN=LOC115216799 PE=3 SV=1; P84245 H33_RAT Histone H3.3 OS=Rattus norvegicus GN=H3f3b PE=1 SV=2; P84227 H32_BOVIN Histone H3.2 OS=Bos taurus PE=1 SV=2; Histone H3 (Fragment) OS=Gonatus antarcticus OX=283054 PE=3 SV=1; Histone H3 (Fragment) OS=Neoteuthis thielei OX=283059 PE=3 SV=1; Histone H…	0	2	2	0.4311	0	1	1	1	516.802	1032.6	1032.59	2.66	0.00137	0/0	0	0	1.68323e+06	HCD (High Energy Collision Dissociation)	MS2	4.57336	35.912	25.2653	4618	4618	4617	MCMMCM34021207.raw	F7	700	2.83	1	0.0001881	3.78x10⁻³	0.792
High	Sequest HT	Sequest HT (A2)	A	2	Unambiguous	IGDENPQLK	IGDENPQLK		3	A0A6P7SNP5	Carbonic anhydrase OS=Octopus vulgaris OX=6645 GN=LOC115214942 PE=3 SV=1	Cluster-58773.140124;orf1 len=286 frame:2 start:206 end:1063 gi; A0A6P7SNP5; A0A7E6EVG2	512811479 ref|XP_002931952.2| PREDICTED: carbonic anhydrase 15 [Xenopus (Silurana) tropicalis]; Carbonic anhydrase OS=Octopus vulgaris OX=6645 GN=LOC115214942 PE=3 SV=1; Carbonic anhydrase OS=Octopus vulgaris OX=6645 GN=LOC115214942 PE=3 SV=1	0	2	2	0.5418	0	1	1	1	507.268	1013.53	1013.53	1.7	0.00086	0/0	0	0	136729	HCD (High Energy Collision Dissociation)	MS2	35.8424	100	25.2325	4613	4613	4606	MCMMCM34021207.raw	F7	907	2.75	1	0.0001881	9.27x10⁻⁴	1.033
High	Sequest HT	Sequest HT (A2)	A	2	Unambiguous	CPEPDAIDR	cPEPDAIDR	C1(Carbamidomethyl)	1	A0A0L8GNM6	Uncharacterized protein OS=Octopus bimaculoides OX=37653 GN=OCBIM_22031096mg PE=4 SV=1	A0A0L8GNM6	Uncharacterized protein OS=Octopus bimaculoides OX=37653 GN=OCBIM_22031096mg PE=4 SV=1	0	2	2	0.6	0	1	1	1	536.74	1072.47	1072.47	0.38	0.0002	0/0	0	0	187333	HCD (High Energy Collision Dissociation)	MS2	44.651	100	25.1711	4602	4602	4595	MCMMCM34021207.raw	F7	259	2.95	1	0.0001881	1.05x10⁻³	1.012
High	Sequest HT	Sequest HT (A2)	A	2	Unambiguous	SVPGNMYSK	SVPGNMYSK		8	A0A6P7SI10; Cluster-58773.163468;orf1 len=382 frame:1 start:88 end:1233 gi	CD109 antigen isoform X2 OS=Octopus vulgaris OX=6645 GN=LOC115213260 PE=4 SV=1 410935705 gb|AFV94409.1| thioester-containing protein 1 [Euprymna scolopes]	Cluster-58773.163464;orf1 len=316 frame:-3 start:949 end:2 gi; A0A6P7SI10; Cluster-58773.163471;orf1 len=369 frame:1 start:1 end:1107 gi; A0A7E6F3R1; Cluster-58773.163469;orf1 len=381 frame:1 start:1 end:1143 gi; Cluster-58773.163466;orf1 len=279 frame:-2 start:838 end:2 gi; Cluster-58773.163468;orf1 len=382 frame:1 start:88 end:1233 gi; Cluster-58773.163467;orf1 len=340 frame:1 start:1 end:1020 …	410935705 gb|AFV94409.1| thioester-containing protein 1 [Euprymna scolopes]; CD109 antigen isoform X2 OS=Octopus vulgaris OX=6645 GN=LOC115213260 PE=4 SV=1; 410935705 gb|AFV94409.1| thioester-containing protein 1 [Euprymna scolopes]; CD109 antigen isoform X1 OS=Octopus vulgaris OX=6645 GN=LOC115213260 PE=4 SV=1; 410935705 gb|AFV94409.1| thioester-containing protein 1 [Euprymna scolopes]; 41093570…	0	2	2	0.5405	0	1	1	1	491.737	982.467	982.466	0.73	0.00036	0/0	0	0	472625	HCD (High Energy Collision Dissociation)	MS2	24.163	100	25.1527	4598	4598	4595	MCMMCM34021207.raw	F7	740	2.22	2	0.0001881	1.96x10⁻²	0.509
High	Sequest HT	Sequest HT (A2)	A	2	Unambiguous	GESAPGHQTEGESAPGPQTEGESAPGPK	GESAPGHQTEGESAPGPQTEGESAPGPK		2	A0A6P7TG54	intermediate filament protein ifa-1-like isoform X1 OS=Octopus vulgaris OX=6645 GN=LOC115222953 PE=4 SV=1	A0A6P7TG54; A0A6P7TJD9	intermediate filament protein ifa-1-like isoform X1 OS=Octopus vulgaris OX=6645 GN=LOC115222953 PE=4 SV=1; intermediate filament protein ifa-1-like isoform X2 OS=Octopus vulgaris OX=6645 GN=LOC115222953 PE=4 SV=1	0	3	3	0.7656	0	1	1	1	897.073	2689.21	2689.2	3.22	0.00289	0/0	0	0	213086	HCD (High Energy Collision Dissociation)	MS2	3.95857	100	24.9351	4558	4558	4551	MCMMCM34021207.raw	F7	584	6.87	1	0.0001881	1.38x10⁻⁹	3.319
High	Sequest HT	Sequest HT (A2)	A	2	Unambiguous	KSCDDKPDDTPKPGPGSLYTR	KScDDKPDDTPKPGPGSLYTR	C3(Carbamidomethyl)	3	A0A7E6FGA6	short-chain collagen C4-like OS=Octopus vulgaris OX=6645 GN=LOC118767007 PE=4 SV=1	A0A7E6FGA6; A0A7E6EGQ5; A0A7E6FGB9	short-chain collagen C4-like OS=Octopus vulgaris OX=6645 GN=LOC118767007 PE=4 SV=1; uncharacterized protein LOC118761149 OS=Octopus vulgaris OX=6645 GN=LOC118761149 PE=4 SV=1; uncharacterized protein LOC118767022 OS=Octopus vulgaris OX=6645 GN=LOC118767022 PE=4 SV=1	1	4	4	0.6815	0	1	1	1	584.283	2334.11	2334.1	2.58	0.0015	0/0	0	0	112889	HCD (High Energy Collision Dissociation)	MS2	29.9088	100	25.4604	4654	4654	4650	MCMMCM34021207.raw	F7	1046	4.49	1	0.0001881	1.51x10⁻⁶	2.127
High	Sequest HT	Sequest HT (A2)	A	2	Unambiguous	LLTNASTGESR	LLTNASTGESR		4	R9WBT1	14-3-3 protein epsilon OS=Octopus bimaculoides OX=37653 PE=2 SV=1	R9WBT1; Cluster-58773.139564;orf2 len=266 frame:3 start:768 end:1565 gi; A0A6P7SHC9; Cluster-58773.139565;orf2 len=179 frame:3 start:1470 end:2006 gi	14-3-3 protein epsilon OS=Octopus bimaculoides OX=37653 PE=2 SV=1; 512130272 gb|AGN96214.1| 14-3-3 protein epsilon [Octopus bimaculoides]; 14-3-3 protein epsilon OS=Octopus vulgaris OX=6645 GN=LOC115213049 PE=3 SV=1; 512130272 gb|AGN96214.1| 14-3-3 protein epsilon [Octopus bimaculoides]	0	2	2	0.5029	0	1	1	1	574.799	1148.59	1148.59	-0.58	-0.00033	0/0	0	0	830055	HCD (High Energy Collision Dissociation)	MS2	3.85259	78.38	23.6132	4312	4312	4309	MCMMCM34021207.raw	F7	1561	3.4	1	0.0001881	8.14x10⁻⁵	1.447
High	Sequest HT	Sequest HT (A2)	A	2	Unambiguous	ECDKHESDLFR	EcDKHESDLFR	C2(Carbamidomethyl)	2	Cluster-58773.152651;orf1 len=273 frame:1 start:403 end:1221 gi	524887592 ref|XP_005100380.1| PREDICTED: gelsolin-like protein 2 [Aplysia californica]>gi|524887594|ref|XP_005100381.1| PREDICTED: gelsolin-like protein 2 [Aplysia californica]>gi|524887596|ref|XP_005100382.1| PREDICTED: gelsolin-like protein 2 [Aplysia californica]	Cluster-58773.152651;orf1 len=273 frame:1 start:403 end:1221 gi; A0A6P7S8D5	524887592 ref|XP_005100380.1| PREDICTED: gelsolin-like protein 2 [Aplysia californica]>gi|524887594|ref|XP_005100381.1| PREDICTED: gelsolin-like protein 2 [Aplysia californica]>gi|524887596|ref|XP_005100382.1| PREDICTED: gelsolin-like protein 2 [Aplysia californica]; gelsolin-like protein 2 OS=Octopus vulgaris OX=6645 GN=LOC115209888 PE=4 SV=1	1	3	3	0.4444	0	1	1	1	479.214	1435.63	1435.63	-0.12	-6e-05	0/0	0	0	483939	HCD (High Energy Collision Dissociation)	MS2	10.5053	93.04	23.5176	4294	4294	4287	MCMMCM34021207.raw	F7	337	2.52	1	0.0001881	2.70x10⁻²	0.453
High	Sequest HT	Sequest HT (A2)	A	2	Unambiguous	SYQVPDDSDKPEK	SYQVPDDSDKPEK		2	A0A7E6EPG6	uncharacterized protein LOC115209496 OS=Octopus vulgaris OX=6645 GN=LOC115209496 PE=4 SV=1	A0A7E6EPG6; Cluster-58773.93719;orf1 len=346 frame:2 start:2 end:1039 gi	uncharacterized protein LOC115209496 OS=Octopus vulgaris OX=6645 GN=LOC115209496 PE=4 SV=1; 762080651 ref|XP_011418176.1| PREDICTED: zonadhesin-like isoform X3 [Crassostrea gigas]	0	2	2	0.4885	0	1	1	1	754.35	1507.69	1507.69	1.31	0.00099	0/0	0	0	517132	HCD (High Energy Collision Dissociation)	MS2	1.47292	100	23.5087	4292	4292	4287	MCMMCM34021207.raw	F7	765	2.17	1	0.0001881	3.88x10⁻⁵	1.573
High	Sequest HT	Sequest HT (A2)	A	2	Unambiguous	KFENEIKEEQEER	KFENEIKEEQEER		6	A0A0L8GRG9	Uncharacterized protein OS=Octopus bimaculoides OX=37653 GN=OCBIM_22029165mg PE=4 SV=1	A0A0L8GRG9; A0A6P7SG33; Cluster-58773.137441;orf1 len=130 frame:-2 start:392 end:3 gi; A0A6P7SH98; Cluster-58773.137440;orf1 len=205 frame:2 start:1046 end:1660 gi; A0A0L8GSR9	Uncharacterized protein OS=Octopus bimaculoides OX=37653 GN=OCBIM_22029165mg PE=4 SV=1; EF-hand domain-containing protein D2 isoform X2 OS=Octopus vulgaris OX=6645 GN=LOC115212783 PE=4 SV=1; 524887886 ref|XP_005100525.1| PREDICTED: EF-hand domain-containing protein D2-like [Aplysia californica]; EF-hand domain-containing protein D2 isoform X1 OS=Octopus vulgaris OX=6645 GN=LOC115212783 PE=4 SV=1;…	2	3	3	0.4654	0	1	1	1	569.944	1707.82	1707.82	-0.59	-0.00034	0/0	0	0	110667	HCD (High Energy Collision Dissociation)	MS2	36.3916	100	22.2167	4052	4052	4045	MCMMCM34021207.raw	F7	1251	2.17	1	0.0001881	2.00x10⁻⁴	1.294
High	Sequest HT	Sequest HT (A2)	A	2	Unambiguous	MATVDTADDSQKR	mATVDTADDSQKR	N-Term(Prot)(Met-loss+Acetyl)	3	Cluster-58773.105280;orf1 len=426 frame:1 start:307 end:1584 gi	827883539 dbj|BAR90777.1| beta arrestin [Idiosepius paradoxus]	Cluster-58773.105280;orf1 len=426 frame:1 start:307 end:1584 gi; Cluster-58773.105275;orf1 len=289 frame:1 start:307 end:1173 gi; Cluster-58773.105282;orf1 len=319 frame:1 start:307 end:1263 gi	827883539 dbj|BAR90777.1| beta arrestin [Idiosepius paradoxus]; 827883539 dbj|BAR90777.1| beta arrestin [Idiosepius paradoxus]; 827883539 dbj|BAR90777.1| beta arrestin [Idiosepius paradoxus]	1	2	2	0.5455	0	1	1	1	674.822	1348.64	1348.63	1.6	0.00108	0/0	0	0	66868.8	HCD (High Energy Collision Dissociation)	MS2	0	100	22.1432	4038	4038	4034	MCMMCM34021207.raw	F7	965	1.87	1	0.0001881	1.67x10⁻³	0.932
High	Sequest HT	Sequest HT (A2)	A	2	Unambiguous	AIDGHTLPNK	AIDGHTLPNK		2	A0A6P7SDC4; Cluster-58773.162319;orf1 len=2921 frame:3 start:24 end:8786 gi	hemocyanin G-type, units Oda to Odg OS=Octopus vulgaris OX=6645 GN=LOC115211670 PE=4 SV=2 16596797 gb|AAK28276.2| hemocyanin G-type [Enteroctopus dofleini]	A0A6P7SDC4; Cluster-58773.162319;orf1 len=2921 frame:3 start:24 end:8786 gi	hemocyanin G-type, units Oda to Odg OS=Octopus vulgaris OX=6645 GN=LOC115211670 PE=4 SV=2; 16596797 gb|AAK28276.2| hemocyanin G-type [Enteroctopus dofleini]	0	2	2	0.5645	0	1	1	1	533.288	1065.57	1065.57	-0.55	-0.00029	0/0	0	0	663208	HCD (High Energy Collision Dissociation)	MS2	20.0652	100	22.0718	4025	4025	4023	MCMMCM34021207.raw	F7	1171	3.1	2	0.0001881	1.98x10⁻³	0.903
High	Sequest HT	Sequest HT (A2)	A	2	Unambiguous	NNPFHHAHIDVANK	NNPFHHAHIDVANK		2	A0A6P7SDC4; Cluster-58773.162319;orf1 len=2921 frame:3 start:24 end:8786 gi	hemocyanin G-type, units Oda to Odg OS=Octopus vulgaris OX=6645 GN=LOC115211670 PE=4 SV=2 16596797 gb|AAK28276.2| hemocyanin G-type [Enteroctopus dofleini]	A0A6P7SDC4; Cluster-58773.162319;orf1 len=2921 frame:3 start:24 end:8786 gi	hemocyanin G-type, units Oda to Odg OS=Octopus vulgaris OX=6645 GN=LOC115211670 PE=4 SV=2; 16596797 gb|AAK28276.2| hemocyanin G-type [Enteroctopus dofleini]	0	2	2	0.6861	0	1	1	1	807.4	1613.79	1613.79	0.11	9e-05	0/0	0	0	234794	HCD (High Energy Collision Dissociation)	MS2	4.02873	100	21.9632	4006	4006	4001	MCMMCM34021207.raw	F7	1161	4.11	2	0.0001881	1.51x10⁻⁶	2.127
High	Sequest HT	Sequest HT (A2)	A	2	Unambiguous	NNPFHHAHIDVANK	NNPFHHAHIDVANK		2	A0A6P7SDC4; Cluster-58773.162319;orf1 len=2921 frame:3 start:24 end:8786 gi	hemocyanin G-type, units Oda to Odg OS=Octopus vulgaris OX=6645 GN=LOC115211670 PE=4 SV=2 16596797 gb|AAK28276.2| hemocyanin G-type [Enteroctopus dofleini]	A0A6P7SDC4; Cluster-58773.162319;orf1 len=2921 frame:3 start:24 end:8786 gi	hemocyanin G-type, units Oda to Odg OS=Octopus vulgaris OX=6645 GN=LOC115211670 PE=4 SV=2; 16596797 gb|AAK28276.2| hemocyanin G-type [Enteroctopus dofleini]	0	4	4	0.3742	0	1	1	1	404.204	1613.79	1613.79	1.08	0.00044	0/0	0	0	22360258	HCD (High Energy Collision Dissociation)	MS2	7.57059	1.541	21.947	4002	4002	4001	MCMMCM34021207.raw	F7	1204	3.26	2	0.0001881	2.36x10⁻²	0.476
High	Sequest HT	Sequest HT (A2)	A	2	Unambiguous	NNPFHHAHIDVANK	NNPFHHAHIDVANK		2	A0A6P7SDC4; Cluster-58773.162319;orf1 len=2921 frame:3 start:24 end:8786 gi	hemocyanin G-type, units Oda to Odg OS=Octopus vulgaris OX=6645 GN=LOC115211670 PE=4 SV=2 16596797 gb|AAK28276.2| hemocyanin G-type [Enteroctopus dofleini]	A0A6P7SDC4; Cluster-58773.162319;orf1 len=2921 frame:3 start:24 end:8786 gi	hemocyanin G-type, units Oda to Odg OS=Octopus vulgaris OX=6645 GN=LOC115211670 PE=4 SV=2; 16596797 gb|AAK28276.2| hemocyanin G-type [Enteroctopus dofleini]	0	3	3	0.3628	0	1	1	1	538.603	1613.79	1613.79	0.48	0.00026	0/0	0	0	1.90323e+06	HCD (High Energy Collision Dissociation)	MS2	1.66912	21.951	21.8881	3991	3991	3990	MCMMCM34021207.raw	F7	1122	3.39	2	0.0001881	2.84x10⁻⁴	1.234
High	Sequest HT	Sequest HT (A2)	A	2	Unambiguous	AWQGKDENVEAAQK	AWQGKDENVEAAQK		8	Cluster-58773.141566;orf1 len=422 frame:2 start:2 end:1267 gi; A0A6P7TM96	405964948 gb|EKC30386.1| Fructose-bisphosphate aldolase [Crassostrea gigas] Fructose-bisphosphate aldolase OS=Octopus vulgaris OX=6645 GN=LOC115226244 PE=3 SV=1	Cluster-58773.141569;orf1 len=371 frame:1 start:1471 end:2583 gi; Cluster-58773.141566;orf1 len=422 frame:2 start:2 end:1267 gi; A0A6P7TM96; Cluster-58773.141575;orf1 len=378 frame:3 start:279 end:1412 gi; Cluster-58773.141574;orf1 len=371 frame:3 start:1548 end:2660 gi; A0A7E6FTI1; A0A6P7TN91; Cluster-58773.141568;orf1 len=106 frame:-2 start:588 end:271 gi	405964948 gb|EKC30386.1| Fructose-bisphosphate aldolase [Crassostrea gigas]; 405964948 gb|EKC30386.1| Fructose-bisphosphate aldolase [Crassostrea gigas]; Fructose-bisphosphate aldolase OS=Octopus vulgaris OX=6645 GN=LOC115226244 PE=3 SV=1; 405964948 gb|EKC30386.1| Fructose-bisphosphate aldolase [Crassostrea gigas]; 405964948 gb|EKC30386.1| Fructose-bisphosphate aldolase [Crassostrea gigas]; Fruct…	1	3	3	0.203	0	1	1	1	525.258	1573.76	1573.76	-0.58	-0.0003	0/0	0	0	401590	HCD (High Energy Collision Dissociation)	MS2	14.0793	100	21.7785	3971	3971	3968	MCMMCM34021207.raw	F7	1114	2.66	2	0.0001881	3.89x10⁻³	0.788
High	Sequest HT	Sequest HT (A2)	A	2	Unambiguous	NNPFHHAHIDVANKDTTR	NNPFHHAHIDVANKDTTR		2	A0A6P7SDC4; Cluster-58773.162319;orf1 len=2921 frame:3 start:24 end:8786 gi	hemocyanin G-type, units Oda to Odg OS=Octopus vulgaris OX=6645 GN=LOC115211670 PE=4 SV=2 16596797 gb|AAK28276.2| hemocyanin G-type [Enteroctopus dofleini]	A0A6P7SDC4; Cluster-58773.162319;orf1 len=2921 frame:3 start:24 end:8786 gi	hemocyanin G-type, units Oda to Odg OS=Octopus vulgaris OX=6645 GN=LOC115211670 PE=4 SV=2; 16596797 gb|AAK28276.2| hemocyanin G-type [Enteroctopus dofleini]	1	3	3	0.6787	0	1	1	1	696.344	2087.02	2087.02	0.29	0.0002	0/0	0	0	540691	HCD (High Energy Collision Dissociation)	MS2	1.13846	65.692	21.558	3928	3928	3924	MCMMCM34021207.raw	F7	1360	6.1	2	0.0001881	6.17x10⁻¹⁰	3.456
High	Sequest HT	Sequest HT (A2)	A	2	Unambiguous	ISECTCYDK	ISEcTcYDK	C4(Carbamidomethyl); C6(Carbamidomethyl)	3	Cluster-123723.0;orf1 len=1033 frame:2 start:2 end:3100 gi; A0A7E6FK29	762085926 ref|XP_011425282.1| PREDICTED: mucin-17-like [Crassostrea gigas] mucin-19-like OS=Octopus vulgaris OX=6645 GN=LOC115224399 PE=4 SV=1	A0A0L8HYY1; Cluster-123723.0;orf1 len=1033 frame:2 start:2 end:3100 gi; A0A7E6FK29	Uncharacterized protein OS=Octopus bimaculoides OX=37653 GN=OCBIM_22001740mg PE=4 SV=1; 762085926 ref|XP_011425282.1| PREDICTED: mucin-17-like [Crassostrea gigas]; mucin-19-like OS=Octopus vulgaris OX=6645 GN=LOC115224399 PE=4 SV=1	0	2	2	0.7059	0	1	1	1	588.24	1175.47	1175.47	1.15	0.00068	0/0	0	0	1.35287e+06	HCD (High Energy Collision Dissociation)	MS2	4.90452	50.895	22.2508	4057	4057	4056	MCMMCM34021207.raw	F7	118	2.38	2	0.0001881	4.30x10⁻³	0.77
High	Sequest HT	Sequest HT (A2)	A	2	Unambiguous	NNPFHHAHIDVANKDTTR	NNPFHHAHIDVANKDTTR		2	A0A6P7SDC4; Cluster-58773.162319;orf1 len=2921 frame:3 start:24 end:8786 gi	hemocyanin G-type, units Oda to Odg OS=Octopus vulgaris OX=6645 GN=LOC115211670 PE=4 SV=2 16596797 gb|AAK28276.2| hemocyanin G-type [Enteroctopus dofleini]	A0A6P7SDC4; Cluster-58773.162319;orf1 len=2921 frame:3 start:24 end:8786 gi	hemocyanin G-type, units Oda to Odg OS=Octopus vulgaris OX=6645 GN=LOC115211670 PE=4 SV=2; 16596797 gb|AAK28276.2| hemocyanin G-type [Enteroctopus dofleini]	1	5	5	0.3647	0	1	1	1	418.209	2087.02	2087.02	-0.44	-0.00018	0/0	0	0	648010	HCD (High Energy Collision Dissociation)	MS2	5.13845	35.683	21.4925	3915	3915	3913	MCMMCM34021207.raw	F7	1301	4.36	2	0.0001881	2.28x10⁻⁵	1.664
High	Sequest HT	Sequest HT (A2)	A	2	Unambiguous	SGVTSTVSDAQK	SGVTSTVSDAQK		5	A0A7E6FR49	perilipin-4-like isoform X2 OS=Octopus vulgaris OX=6645 GN=LOC115225102 PE=4 SV=1	Cluster-58773.137845;orf1 len=447 frame:-2 start:1516 end:176 gi; A0A7E6FR49; A0A6P7TPR6; A0A0L8IH61; Cluster-58773.137841;orf1 len=352 frame:1 start:1 end:1056 gi	584067550 ref|XP_006754171.1| PREDICTED: perilipin-4 [Myotis davidii]>gi|432116854|gb|ELK37441.1| Perilipin-4 [Myotis davidii]; perilipin-4-like isoform X2 OS=Octopus vulgaris OX=6645 GN=LOC115225102 PE=4 SV=1; Peroxiredoxin-like 2 activated in M-CSF stimulated monocytes OS=Octopus vulgaris OX=6645 GN=LOC115225102 PE=3 SV=1; Uncharacterized protein (Fragment) OS=Octopus bimaculoides OX=37653 GN=O…	0	2	2	0.5078	0	1	1	1	590.296	1179.58	1179.59	-0.59	-0.00035	0/0	0	0	178310	HCD (High Energy Collision Dissociation)	MS2	17.8261	100	21.4321	3904	3904	3902	MCMMCM34021207.raw	F7	1362	2.58	1	0.0001881	3.02x10⁻⁵	1.616
High	Sequest HT	Sequest HT (A2)	A	2	Unambiguous	EIESGAGSQSPSPR	EIESGAGSQSPSPR		13	Cluster-58773.171288;orf1 len=880 frame:2 start:383 end:3022 gi	762142812 ref|XP_011454635.1| PREDICTED: enolase-phosphatase E1-like isoform X6 [Crassostrea gigas]	Cluster-58773.171291;orf2 len=540 frame:3 start:108 end:1727 gi; Cluster-58773.171289;orf2 len=863 frame:3 start:396 end:2984 gi; Cluster-58773.171293;orf2 len=511 frame:1 start:259 end:1791 gi; Cluster-58773.171284;orf2 len=857 frame:2 start:494 end:3064 gi; A0A6P7SXS2; Cluster-58773.171292;orf2 len=876 frame:2 start:383 end:3010 gi; A0A6P7SXS0; A0A6P7SZH1; Cluster-58773.171287;orf1 len=646 fram…	762142808 ref|XP_011454633.1| PREDICTED: enolase-phosphatase E1-like isoform X4 [Crassostrea gigas]; 762142824 ref|XP_011454642.1| PREDICTED: enolase-phosphatase E1-like isoform X12 [Crassostrea gigas]; 762142810 ref|XP_011454634.1| PREDICTED: enolase-phosphatase E1-like isoform X5 [Crassostrea gigas]; 762142824 ref|XP_011454642.1| PREDICTED: enolase-phosphatase E1-like isoform X12 [Crassostrea g…	0	2	2	0.7329	0	1	1	1	701.333	1401.66	1401.66	-0.75	-0.00053	0/0	0	0	60974.7	HCD (High Energy Collision Dissociation)	MS2	8.06564	100	21.3473	3890	3890	3880	MCMMCM34021207.raw	F7	861	3.07	1	0.0001881	3.85x10⁻⁷	2.359
High	Sequest HT	Sequest HT (A2)	A	2	Unambiguous	IENNAPDATSPR	IENNAPDATSPR		7	Cluster-58773.171288;orf1 len=880 frame:2 start:383 end:3022 gi	762142812 ref|XP_011454635.1| PREDICTED: enolase-phosphatase E1-like isoform X6 [Crassostrea gigas]	Cluster-58773.171291;orf2 len=540 frame:3 start:108 end:1727 gi; Cluster-58773.171289;orf2 len=863 frame:3 start:396 end:2984 gi; Cluster-58773.171293;orf2 len=511 frame:1 start:259 end:1791 gi; Cluster-58773.171284;orf2 len=857 frame:2 start:494 end:3064 gi; Cluster-58773.171292;orf2 len=876 frame:2 start:383 end:3010 gi; Cluster-58773.171287;orf1 len=646 frame:1 start:271 end:2208 gi; Cluster-5…	762142808 ref|XP_011454633.1| PREDICTED: enolase-phosphatase E1-like isoform X4 [Crassostrea gigas]; 762142824 ref|XP_011454642.1| PREDICTED: enolase-phosphatase E1-like isoform X12 [Crassostrea gigas]; 762142810 ref|XP_011454634.1| PREDICTED: enolase-phosphatase E1-like isoform X5 [Crassostrea gigas]; 762142824 ref|XP_011454642.1| PREDICTED: enolase-phosphatase E1-like isoform X12 [Crassostrea g…	0	2	2	0.5954	0	1	1	1	642.812	1284.62	1284.62	-0.53	-0.00034	0/0	0	0	158777	HCD (High Energy Collision Dissociation)	MS2	0	100	21.3288	3886	3886	3880	MCMMCM34021207.raw	F7	954	3.04	1	0.0001881	1.01x10⁻⁶	2.195
High	Sequest HT	Sequest HT (A2)	A	2	Unambiguous	AEGAQYISHGATGK	AEGAQYISHGATGK		4	A0A6P7SNW2	Argininosuccinate synthase OS=Octopus vulgaris OX=6645 GN=LOC115214493 PE=3 SV=1	Cluster-58773.167310;orf2 len=287 frame:2 start:464 end:1324 gi; Cluster-58773.167315;orf1 len=313 frame:2 start:464 end:1402 gi; A0A6P7SNW2; Cluster-58773.167313;orf1 len=423 frame:3 start:474 end:1742 gi	513137512 gb|AGO20698.1| argininosuccinate synthetase [Protopterus annectens]; 638253347 ref|NP_001279058.1| argininosuccinate synthase 1 [Callorhinchus milii]>gi|387915462|gb|AFK11340.1| Argininosuccinate synthase [Callorhinchus milii]; Argininosuccinate synthase OS=Octopus vulgaris OX=6645 GN=LOC115214493 PE=3 SV=1; 513137512 gb|AGO20698.1| argininosuccinate synthetase [Protopterus annectens]	0	3	3	0.5059	0	1	1	1	463.896	1389.67	1389.68	-1.04	-0.00048	0/0	0	0	62729.7	HCD (High Energy Collision Dissociation)	MS2	30.4361	100	21.2597	3873	3873	3869	MCMMCM34021207.raw	F7	1228	2.55	1	0.0001881	5.17x10⁻³	0.739
High	Sequest HT	Sequest HT (A2)	A	2	Unambiguous	IASKPTEAEIR	IASKPTEAEIR		3	Cluster-58773.163293;orf1 len=95 frame:3 start:567 end:851 gi	871243797 ref|XP_012940045.1| PREDICTED: uncharacterized protein LOC101860584 [Aplysia californica]	Cluster-58773.163292;orf1 len=88 frame:-3 start:265 end:2 gi; Cluster-58773.163293;orf1 len=95 frame:3 start:567 end:851 gi; Cluster-58773.163295;orf1 len=89 frame:3 start:567 end:833 gi	780104507 ref|XP_011675693.1| PREDICTED: proactivator polypeptide [Strongylocentrotus purpuratus]; 871243797 ref|XP_012940045.1| PREDICTED: uncharacterized protein LOC101860584 [Aplysia californica]; 91077504 ref|XP_966852.1| PREDICTED: prosaposin [Tribolium castaneum]>gi|270001598|gb|EEZ98045.1| hypothetical protein TcasGA2_TC000449 [Tribolium castaneum]	0	3	3	0.4606	0	1	1	1	405.563	1214.67	1214.67	-0.33	-0.00013	0/0	0	0	163945	HCD (High Energy Collision Dissociation)	MS2	5.26394	100	21.1935	3861	3861	3858	MCMMCM34021207.raw	F7	1403	2.41	1	0.0001881	5.46x10⁻⁴	1.123
High	Sequest HT	Sequest HT (A2)	A	2	Unambiguous	SGYECPEER	SGYEcPEER	C5(Carbamidomethyl)	4	Cluster-58773.129918;orf1 len=663 frame:2 start:497 end:2485 gi	676453947 ref|XP_009053520.1| hypothetical protein LOTGIDRAFT_203811 [Lottia gigantea]>gi|556107015|gb|ESO95667.1| hypothetical protein LOTGIDRAFT_203811 [Lottia gigantea]	A0A0L8HM04; A0A6P7S7W6; A0A0L8HLP4; Cluster-58773.129918;orf1 len=663 frame:2 start:497 end:2485 gi	Uncharacterized protein OS=Octopus bimaculoides OX=37653 GN=OCBIM_22011688mg PE=4 SV=1; protein DD3-3 OS=Octopus vulgaris OX=6645 GN=LOC115209840 PE=4 SV=1; Uncharacterized protein OS=Octopus bimaculoides OX=37653 GN=OCBIM_22011688mg PE=4 SV=1; 676453947 ref|XP_009053520.1| hypothetical protein LOTGIDRAFT_203811 [Lottia gigantea]>gi|556107015|gb|ESO95667.1| hypothetical protein LOTGIDRAFT_203811 …	0	2	2	0.8	0	1	1	1	563.727	1126.45	1126.45	-0.21	-0.00012	0/0	0	0	125931	HCD (High Energy Collision Dissociation)	MS2	15.4008	100	21.0661	3838	3838	3836	MCMMCM34021207.raw	F7	87	2.05	1	0.0001881	1.22x10⁻³	0.986
High	Sequest HT	Sequest HT (A2)	A	2	Unambiguous	GVTGNTCYENR	GVTGNTcYENR	C7(Carbamidomethyl)	5	A0A7E6EVN8	mucin-like protein OS=Octopus vulgaris OX=6645 GN=LOC115213503 PE=4 SV=1	Cluster-58773.84428;orf1 len=1302 frame:1 start:1 end:3906 gi; A0A7E6EVN8; Cluster-58773.84427;orf2 len=1057 frame:1 start:1 end:3171 gi; Cluster-58773.84430;orf1 len=1319 frame:1 start:1 end:3957 gi; Cluster-58773.84429;orf1 len=1366 frame:1 start:1 end:4098 gi	847132402 ref|XP_012819335.1| PREDICTED: mucin-like protein [Xenopus (Silurana) tropicalis]; mucin-like protein OS=Octopus vulgaris OX=6645 GN=LOC115213503 PE=4 SV=1; 313240015 emb|CBY32374.1| unnamed protein product [Oikopleura dioica]; 847132402 ref|XP_012819335.1| PREDICTED: mucin-like protein [Xenopus (Silurana) tropicalis]; 847132402 ref|XP_012819335.1| PREDICTED: mucin-like protein [Xenopus…	0	2	2	0.64	0	1	1	1	635.778	1270.55	1270.55	0.22	0.00014	0/0	0	0	184513	HCD (High Energy Collision Dissociation)	MS2	4.8768	100	21.0615	3837	3837	3836	MCMMCM34021207.raw	F7	396	2.75	1	0.0001881	3.67x10⁻⁵	1.583
High	Sequest HT	Sequest HT (A2)	A	2	Unambiguous	TATPEQAQSVHASLRK	TATPEQAQSVHASLRK		5	A0A0S1U346	Triosephosphate isomerase OS=Amphioctopus fangsiao OX=515817 PE=2 SV=1	Cluster-58773.133363;orf1 len=118 frame:-3 start:355 end:2 gi; Cluster-58773.133364;orf1 len=208 frame:-3 start:625 end:2 gi; Cluster-58773.133367;orf1 len=235 frame:1 start:601 end:1305 gi; A0A0S1U346; Cluster-58773.133362;orf1 len=150 frame:2 start:305 end:754 gi	339013169 gb|AEJ33823.1| triosephosphate isomerase [Octopus bimaculoides]; 339013169 gb|AEJ33823.1| triosephosphate isomerase [Octopus bimaculoides]; 762143735 ref|XP_011455124.1| PREDICTED: triosephosphate isomerase-like [Crassostrea gigas]; Triosephosphate isomerase OS=Amphioctopus fangsiao OX=515817 PE=2 SV=1; 339013169 gb|AEJ33823.1| triosephosphate isomerase [Octopus bimaculoides]	1	4	4	0.5766	0	1	1	1	431.732	1723.9	1723.91	-2.15	-0.00093	0/0	0	0	37089.6	HCD (High Energy Collision Dissociation)	MS2	33.5578	100	21.0413	3835	3835	3825	MCMMCM34021207.raw	F7	1288	2.74	1	0.0001881	1.23x10⁻²	0.59
High	Sequest HT	Sequest HT (A2)	A	2	Unambiguous	NNPFHHAHIDVANKDTTR	NNPFHHAHIDVANKDTTR		2	A0A6P7SDC4; Cluster-58773.162319;orf1 len=2921 frame:3 start:24 end:8786 gi	hemocyanin G-type, units Oda to Odg OS=Octopus vulgaris OX=6645 GN=LOC115211670 PE=4 SV=2 16596797 gb|AAK28276.2| hemocyanin G-type [Enteroctopus dofleini]	A0A6P7SDC4; Cluster-58773.162319;orf1 len=2921 frame:3 start:24 end:8786 gi	hemocyanin G-type, units Oda to Odg OS=Octopus vulgaris OX=6645 GN=LOC115211670 PE=4 SV=2; 16596797 gb|AAK28276.2| hemocyanin G-type [Enteroctopus dofleini]	1	4	4	0.5586	0	1	1	1	522.509	2087.01	2087.02	-0.86	-0.00045	0/0	0	0	642045	HCD (High Energy Collision Dissociation)	MS2	4.43742	44.071	21.4889	3914	3914	3913	MCMMCM34021207.raw	F7	1297	5.12	2	0.0001881	1.58x10⁻⁷	2.511
High	Sequest HT	Sequest HT (A2)	A	2	Unambiguous	DGVNTNKQNFNENNVNPK	DGVNTNKQNFNENNVNPK		2	Cluster-58773.129918;orf1 len=663 frame:2 start:497 end:2485 gi	676453947 ref|XP_009053520.1| hypothetical protein LOTGIDRAFT_203811 [Lottia gigantea]>gi|556107015|gb|ESO95667.1| hypothetical protein LOTGIDRAFT_203811 [Lottia gigantea]	Cluster-58773.180394;orf1 len=79 frame:-2 start:239 end:3 gi; Cluster-58773.129918;orf1 len=663 frame:2 start:497 end:2485 gi	514698432 ref|XP_004996785.1| hypothetical protein PTSG_02296 [Salpingoeca rosetta]>gi|326436011|gb|EGD81581.1| hypothetical protein PTSG_02296 [Salpingoeca rosetta]; 676453947 ref|XP_009053520.1| hypothetical protein LOTGIDRAFT_203811 [Lottia gigantea]>gi|556107015|gb|ESO95667.1| hypothetical protein LOTGIDRAFT_203811 [Lottia gigantea]	1	3	3	0.5375	0	1	1	1	682.661	2045.97	2045.96	2.24	0.00153	0/0	0	0	146785	HCD (High Energy Collision Dissociation)	MS2	3.85473	100	25.7669	4710	4710	4705	MCMMCM34021207.raw	F7	990	3.2	1	0.0001881	4.82x10⁻⁵	1.537
High	Sequest HT	Sequest HT (A2)	A	2	Unambiguous	QHITQDTDDELK	QHITQDTDDELK		5	A0A6P7SWF4	calmodulin isoform X1 OS=Octopus vulgaris OX=6645 GN=LOC115217131 PE=4 SV=1	Cluster-58773.191100;orf1 len=81 frame:-3 start:411 end:169 gi; Cluster-58773.191101;orf1 len=184 frame:1 start:112 end:663 gi; A0A6P7SWF4; A0A6P7SWI6; Cluster-58773.191099;orf1 len=153 frame:3 start:369 end:827 gi	389565944 gb|AFK83801.1| calmodulin [Mnemiopsis leidyi]; 389565944 gb|AFK83801.1| calmodulin [Mnemiopsis leidyi]; calmodulin isoform X1 OS=Octopus vulgaris OX=6645 GN=LOC115217131 PE=4 SV=1; calmodulin isoform X2 OS=Octopus vulgaris OX=6645 GN=LOC115217131 PE=4 SV=1; 389565944 gb|AFK83801.1| calmodulin [Mnemiopsis leidyi]	0	3	3	0.5464	0	1	1	1	481.563	1442.67	1442.68	-0.69	-0.00033	0/0	0	0	237080	HCD (High Energy Collision Dissociation)	MS2	15.8203	100	22.2545	4058	4058	4056	MCMMCM34021207.raw	F7	860	3.02	1	0.0001881	1.29x10⁻³	0.977
High	Sequest HT	Sequest HT (A2)	A	2	Unambiguous	GHGPGGSIYGPEGK	GHGPGGSIYGPEGK		40	A0A7E6F8D1; Cluster-58773.139722;orf1 len=305 frame:2 start:2 end:916 gi	neuroblast differentiation-associated protein AHNAK isoform X37 OS=Octopus vulgaris OX=6645 GN=LOC115218249 PE=4 SV=1 558118597 ref|XP_006113633.1| PREDICTED: LOW QUALITY PROTEIN: neuroblast differentiation-associated protein AHNAK-like [Pelodiscus sinensis]	A0A7E6F8D1; A0A7E6F8A2; A0A7E6F8A6; A0A6P7T0A6; A0A7E6F9S0; A0A7E6F8C0; A0A6P7T0F8; A0A7E6F8A7; A0A6P7SZQ0; A0A7E6F8B0; A0A7E6F8B7; A0A7E6F9R5; A0A7E6F9R0; A0A7E6FAM6; A0A7E6FAN6; A0A7E6F8C9; A0A6P7SZP6; A0A7E6F8B2; A0A7E6F9Q4; A0A7E6F8Z4; A0A7E6F8C3; A0A7E6F9P9; A0A7E6FAN1; A0A7E6FAP7; A0A6P7T1G0; A0A6P7T0B0; A0A7E6FAQ3; A0A7E6F900; A0A7E6F9P5; A0A7E6FAQ9; Cluster-58773.139722;orf1 len=305 frame…	neuroblast differentiation-associated protein AHNAK isoform X37 OS=Octopus vulgaris OX=6645 GN=LOC115218249 PE=4 SV=1; neuroblast differentiation-associated protein AHNAK isoform X4 OS=Octopus vulgaris OX=6645 GN=LOC115218249 PE=4 SV=1; uncharacterized protein LOC115218249 isoform X9 OS=Octopus vulgaris OX=6645 GN=LOC115218249 PE=4 SV=1; uncharacterized protein LOC115218249 isoform X18 OS=Octopus…	0	3	3	0.5421	0	1	1	1	438.214	1312.63	1312.63	-0.36	-0.00016	0/0	0	0	89663.3	HCD (High Energy Collision Dissociation)	MS2	30.9839	100	22.3192	4070	4070	4067	MCMMCM34021207.raw	F7	858	2.14	2	0.0001881	2.41x10⁻³	0.869
High	Sequest HT	Sequest HT (A2)	A	2	Unambiguous	SYQVPDDSDKPEK	SYQVPDDSDKPEK		2	A0A7E6EPG6	uncharacterized protein LOC115209496 OS=Octopus vulgaris OX=6645 GN=LOC115209496 PE=4 SV=1	A0A7E6EPG6; Cluster-58773.93719;orf1 len=346 frame:2 start:2 end:1039 gi	uncharacterized protein LOC115209496 OS=Octopus vulgaris OX=6645 GN=LOC115209496 PE=4 SV=1; 762080651 ref|XP_011418176.1| PREDICTED: zonadhesin-like isoform X3 [Crassostrea gigas]	0	3	3	0.5	0	1	1	1	503.236	1507.69	1507.69	1.51	0.00076	0/0	0	0	3007919	HCD (High Energy Collision Dissociation)	MS2	0.986395	15.449	23.4935	4288	4288	4287	MCMMCM34021207.raw	F7	747	2.44	1	0.0001881	5.24x10⁻⁴	1.13
High	Sequest HT	Sequest HT (A2)	A	2	Unambiguous	YSTCGSPCPQTCR	YSTcGSPcPQTcR	C4(Carbamidomethyl); C8(Carbamidomethyl); C12(Carbamidomethyl)	5	A0A7E6F2Q3	SCO-spondin-like OS=Octopus vulgaris OX=6645 GN=LOC118764670 PE=4 SV=1	A0A0L8GDW8; Cluster-58773.135546;orf1 len=1748 frame:1 start:202 end:5445 gi; Cluster-58773.239729;orf1 len=150 frame:-1 start:452 end:3 gi; A0A7E6F2Q3; Cluster-58773.135543;orf1 len=724 frame:2 start:3260 end:5431 gi	C8 domain-containing protein (Fragment) OS=Octopus bimaculoides OX=37653 GN=OCBIM_22035121mg PE=4 SV=1; 762085926 ref|XP_011425282.1| PREDICTED: mucin-17-like [Crassostrea gigas]; 762085926 ref|XP_011425282.1| PREDICTED: mucin-17-like [Crassostrea gigas]; SCO-spondin-like OS=Octopus vulgaris OX=6645 GN=LOC118764670 PE=4 SV=1; 762085926 ref|XP_011425282.1| PREDICTED: mucin-17-like [Crassostrea gig…	0	2	2	0.7344	0	1	1	1	787.313	1573.62	1573.62	-0.69	-0.00054	0/0	0	0	244701	HCD (High Energy Collision Dissociation)	MS2	0	100	23.3595	4264	4264	4254	MCMMCM34021207.raw	F7	62	3.2	1	0.0001881	5.42x10⁻⁷	2.301
High	Sequest HT	Sequest HT (A2)	A	2	Unambiguous	NIQQSCENIR	NIQQScENIR	C6(Carbamidomethyl)	6	A0A6P7TEW0	Aminopeptidase OS=Octopus vulgaris OX=6645 GN=LOC115223377 PE=3 SV=1	A0A6P7TEW0; Cluster-58773.88132;orf1 len=59 frame:-2 start:201 end:25 sp; A0A812E6K0; Cluster-58773.88130;orf1 len=870 frame:3 start:327 end:2936 gi; A0A812ED08; A0A0L8GAS1	Aminopeptidase OS=Octopus vulgaris OX=6645 GN=LOC115223377 PE=3 SV=1; Q11011 PSA_MOUSE Puromycin-sensitive aminopeptidase OS=Mus musculus GN=Npepps PE=1 SV=2; Aminopeptidase OS=Sepia pharaonis OX=158019 GN=SPHA_69027 PE=3 SV=1; 762145751 ref|XP_011456155.1| PREDICTED: puromycin-sensitive aminopeptidase-like [Crassostrea gigas]; Aminopeptidase OS=Sepia pharaonis OX=158019 GN=SPHA_69027 PE=3 SV=1; …	0	2	2	0.417	0	1	1	1	631.301	1261.6	1261.6	0.1	6e-05	0/0	0	0	703051	HCD (High Energy Collision Dissociation)	MS2	11.8729	93.508	23.3327	4258	4258	4254	MCMMCM34021207.raw	F7	899	2.83	1	0.0001881	2.00x10⁻³	0.901
High	Sequest HT	Sequest HT (A2)	A	2	Unambiguous	DSYVGDEAQSK	DSYVGDEAQSK		27	A0A6P7SM13; I0JGT9	actin, cytoplasmic OS=Octopus vulgaris OX=6645 GN=LOC115214121 PE=3 SV=1 Actin I OS=Sepia officinalis OX=6610 GN=ACTI PE=2 SV=1	I0JGU0; Cluster-659.0;orf1 len=379 frame:3 start:45 end:1181 gi; A0A6P7SKQ4; Cluster-382.0;orf1 len=114 frame:-3 start:342 end:1 gi; F1ADJ3; D3GBA7; Cluster-58773.161083;orf1 len=335 frame:2 start:2273 end:3277 gi; A0A0L8HEW9; A4D0I0; F1ADJ2; Cluster-116978.7;orf1 len=236 frame:-3 start:710 end:3 gi; A0A6P7SM13; G3LVJ6; A0A0L8GHK7; A0A6P7U554; A0A812CKE2; D3GBA8; A0A812C079; A0A0L8GHH1; A0A2S1FRU…	Actin II OS=Sepia officinalis OX=6610 GN=ACTII PE=2 SV=1; 10304437 gb|AAG16253.1|AF300705_1 beta-actin [Litopenaeus vannamei]>gi|13647003|dbj|BAB41102.1| actin [Marsupenaeus japonicus]>gi|34576243|emb|CAE46725.1| beta actin [Homarus gammarus]>gi|51472040|gb|AAU04441.1| beta-actin [Macrobrachium rosenbergii]>gi|68138000|gb|AAY85815.1| beta-actin [Callinectes sapidus]>gi|77955978|gb|ABB05541.1| bet…	0	2	2	0.6304	0	1	1	1	599.765	1198.52	1198.52	0.47	0.00028	0/0	0	0	1.56689e+06	HCD (High Energy Collision Dissociation)	MS2	0	41.262	23.3292	4257	4257	4254	MCMMCM34021207.raw	F7	421	2.3	2	0.0001881	6.49x10⁻⁴	1.093
High	Sequest HT	Sequest HT (A2)	A	2	Unambiguous	SSCLTSCHDLDK	SScLTScHDLDK	C3(Carbamidomethyl); C7(Carbamidomethyl)	3	Cluster-123723.0;orf1 len=1033 frame:2 start:2 end:3100 gi; A0A7E6FK29	762085926 ref|XP_011425282.1| PREDICTED: mucin-17-like [Crassostrea gigas] mucin-19-like OS=Octopus vulgaris OX=6645 GN=LOC115224399 PE=4 SV=1	A0A0L8HYY1; Cluster-123723.0;orf1 len=1033 frame:2 start:2 end:3100 gi; A0A7E6FK29	Uncharacterized protein OS=Octopus bimaculoides OX=37653 GN=OCBIM_22001740mg PE=4 SV=1; 762085926 ref|XP_011425282.1| PREDICTED: mucin-17-like [Crassostrea gigas]; mucin-19-like OS=Octopus vulgaris OX=6645 GN=LOC115224399 PE=4 SV=1	0	2	2	0.7143	0	1	1	1	711.804	1422.6	1422.6	0.9	0.00064	0/0	0	0	355373	HCD (High Energy Collision Dissociation)	MS2	0	100	23.2768	4247	4247	4243	MCMMCM34021207.raw	F7	226	2.59	2	0.0001881	4.00x10⁻⁴	1.176
High	Sequest HT	Sequest HT (A2)	A	2	Unambiguous	WTNEHSPSGVVSK	WTNEHSPSGVVSK		5	A0A6P7SI10; Cluster-58773.163438;orf1 len=994 frame:2 start:254 end:3235 gi	CD109 antigen isoform X2 OS=Octopus vulgaris OX=6645 GN=LOC115213260 PE=4 SV=1 410935705 gb|AFV94409.1| thioester-containing protein 1 [Euprymna scolopes]	A0A6P7SI10; A0A7E6F3R1; Cluster-58773.154255;orf1 len=111 frame:-2 start:335 end:3 gi; Cluster-58773.160936;orf1 len=201 frame:-2 start:603 end:1 gi; Cluster-58773.163438;orf1 len=994 frame:2 start:254 end:3235 gi	CD109 antigen isoform X2 OS=Octopus vulgaris OX=6645 GN=LOC115213260 PE=4 SV=1; CD109 antigen isoform X1 OS=Octopus vulgaris OX=6645 GN=LOC115213260 PE=4 SV=1; 641691039 ref|XP_008137703.1| PREDICTED: CD109 antigen [Eptesicus fuscus]; 410935705 gb|AFV94409.1| thioester-containing protein 1 [Euprymna scolopes]; 410935705 gb|AFV94409.1| thioester-containing protein 1 [Euprymna scolopes]	0	2	2	0.6114	0	1	1	1	714.35	1427.69	1427.69	1.02	0.00073	0/0	0	0	1.39101e+06	HCD (High Energy Collision Dissociation)	MS2	5.52534	46.842	23.2128	4234	4234	4232	MCMMCM34021207.raw	F7	1135	4.22	2	0.0001881	9.50x10⁻⁶	1.813
High	Sequest HT	Sequest HT (A2)	A	2	Unambiguous	KPCSLYDGCDQPNNK	KPcSLYDGcDQPNNK	C3(Carbamidomethyl); C9(Carbamidomethyl)	2	A0A7E6EUU6; Cluster-58773.3592;orf1 len=360 frame:2 start:146 end:1225 gi	uncharacterized protein LOC115211110 OS=Octopus vulgaris OX=6645 GN=LOC115211110 PE=4 SV=1 676454209 ref|XP_009053606.1| hypothetical protein LOTGIDRAFT_116769, partial [Lottia gigantea]>gi|556107106|gb|ESO95758.1| hypothetical protein LOTGIDRAFT_116769, partial [Lottia gigantea]	A0A7E6EUU6; Cluster-58773.3592;orf1 len=360 frame:2 start:146 end:1225 gi	uncharacterized protein LOC115211110 OS=Octopus vulgaris OX=6645 GN=LOC115211110 PE=4 SV=1; 676454209 ref|XP_009053606.1| hypothetical protein LOTGIDRAFT_116769, partial [Lottia gigantea]>gi|556107106|gb|ESO95758.1| hypothetical protein LOTGIDRAFT_116769, partial [Lottia gigantea]	0	3	3	0.6033	0	1	1	1	599.262	1795.77	1795.77	-1.47	-0.00088	0/0	0	0	125100	HCD (High Energy Collision Dissociation)	MS2	9.04562	100	23.1727	4227	4227	4221	MCMMCM34021207.raw	F7	349	3	2	0.0001881	9.74x10⁻⁴	1.024
High	Sequest HT	Sequest HT (A2)	A	2	Unambiguous	QEYDESGPSIVHRK	QEYDESGPSIVHRK		20	A0A6P7SM13; I0JGT9	actin, cytoplasmic OS=Octopus vulgaris OX=6645 GN=LOC115214121 PE=3 SV=1 Actin I OS=Sepia officinalis OX=6610 GN=ACTI PE=2 SV=1	I0JGU0; Cluster-659.0;orf1 len=379 frame:3 start:45 end:1181 gi; A0A6P7SKQ4; F6JYC9; F1ADJ3; Cluster-58773.161076;orf1 len=296 frame:2 start:2 end:889 gi; D3GBA7; Cluster-58773.161083;orf1 len=335 frame:2 start:2273 end:3277 gi; Cluster-2671.0;orf1 len=213 frame:2 start:2 end:640 gi; A4D0I0; F1ADJ2; A0A6P7SM13; A0A0L8GHK7; D3GBA8; A0A812C079; A0A0L8GHH1; A0A812C6F3; D2YZ90; I0JGT9; Cluster-58773.…	Actin II OS=Sepia officinalis OX=6610 GN=ACTII PE=2 SV=1; 10304437 gb|AAG16253.1|AF300705_1 beta-actin [Litopenaeus vannamei]>gi|13647003|dbj|BAB41102.1| actin [Marsupenaeus japonicus]>gi|34576243|emb|CAE46725.1| beta actin [Homarus gammarus]>gi|51472040|gb|AAU04441.1| beta-actin [Macrobrachium rosenbergii]>gi|68138000|gb|AAY85815.1| beta-actin [Callinectes sapidus]>gi|77955978|gb|ABB05541.1| bet…	1	3	3	0.7295	0	1	1	1	548.938	1644.8	1644.8	0.74	0.0004	0/0	0	0	170625	HCD (High Energy Collision Dissociation)	MS2	15.5091	100	23.1681	4226	4226	4221	MCMMCM34021207.raw	F7	1089	3.29	2	0.0001881	7.26x10⁻⁶	1.859
High	Sequest HT	Sequest HT (A2)	A	2	Unambiguous	TLLESHYAEHK	TLLESHYAEHK		3	Cluster-58773.127031;orf1 len=154 frame:-3 start:549 end:88 gi	405978782 gb|EKC43144.1| Nucleoside diphosphate kinase B [Crassostrea gigas]	Cluster-58773.127031;orf1 len=154 frame:-3 start:549 end:88 gi; A0A0L8FPQ2; Cluster-58773.127032;orf1 len=154 frame:1 start:67 end:528 gi	405978782 gb|EKC43144.1| Nucleoside diphosphate kinase B [Crassostrea gigas]; NDK domain-containing protein OS=Octopus bimaculoides OX=37653 GN=OCBIM_22012462mg PE=3 SV=1; 677288681 gb|KFP71109.1| Nucleoside diphosphate kinase, partial [Acanthisitta chloris]	0	3	3	0.5485	0	1	1	1	443.225	1327.66	1327.66	-1.67	-0.00074	0/0	0	0	132813	HCD (High Energy Collision Dissociation)	MS2	23.1544	100	22.2684	4061	4061	4056	MCMMCM34021207.raw	F7	1050	2.68	1	0.0001881	1.21x10⁻⁴	1.38
High	Sequest HT	Sequest HT (A2)	A	2	Unambiguous	GGEEVEEIKGANESK	GGEEVEEIKGANESK		1	Cluster-58773.192724;orf1 len=110 frame:1 start:409 end:738 gi	340369254 ref|XP_003383163.1| PREDICTED: thioredoxin-like [Amphimedon queenslandica]	Cluster-58773.192724;orf1 len=110 frame:1 start:409 end:738 gi	340369254 ref|XP_003383163.1| PREDICTED: thioredoxin-like [Amphimedon queenslandica]	1	2	2	0.5949	0	1	1	1	788.379	1575.75	1575.75	0.67	0.00053	0/0	0	0	175452	HCD (High Energy Collision Dissociation)	MS2	24.2738	100	23.0574	4206	4206	4199	MCMMCM34021207.raw	F7	1124	2.74	1	0.0001881	1.70x10⁻⁵	1.714
High	Sequest HT	Sequest HT (A2)	A	2	Unambiguous	EEETHFTSEEGPK	EEETHFTSEEGPK		3	A0A6P7SCB7	gelsolin-like protein 2 OS=Octopus vulgaris OX=6645 GN=LOC115211599 PE=4 SV=1	A0A6P7SCB7; Cluster-58773.146613;orf1 len=117 frame:-1 start:353 end:3 gi; Cluster-58773.146608;orf1 len=157 frame:1 start:1 end:471 gi	gelsolin-like protein 2 OS=Octopus vulgaris OX=6645 GN=LOC115211599 PE=4 SV=1; 387598251 gb|AFJ91781.1| gelsolin-like protein, partial [Ostrea edulis]; 387598251 gb|AFJ91781.1| gelsolin-like protein, partial [Ostrea edulis]	0	3	3	0.5	0	1	1	1	507.223	1519.65	1519.65	-0.15	-8e-05	0/0	0	0	183374	HCD (High Energy Collision Dissociation)	MS2	9.5568	100	23.0062	4197	4197	4188	MCMMCM34021207.raw	F7	354	1.94	1	0.0001881	3.82x10⁻⁴	1.184
High	Sequest HT	Sequest HT (A2)	A	2	Unambiguous	MDITHVIHK	mDITHVIHK	M1(Oxidation)	4	A0A6P7SER3; A0A6P7SDC4; Cluster-58773.162319;orf1 len=2921 frame:3 start:24 end:8786 gi	hemocyanin 1-like OS=Octopus vulgaris OX=6645 GN=LOC115212215 PE=4 SV=2 hemocyanin G-type, units Oda to Odg OS=Octopus vulgaris OX=6645 GN=LOC115211670 PE=4 SV=2 16596797 gb|AAK28276.2| hemocyanin G-type [Enteroctopus dofleini]	A0A6P7SER3; Cluster-58773.162316;orf1 len=2526 frame:3 start:24 end:7601 gi; A0A6P7SDC4; Cluster-58773.162319;orf1 len=2921 frame:3 start:24 end:8786 gi	hemocyanin 1-like OS=Octopus vulgaris OX=6645 GN=LOC115212215 PE=4 SV=2; 16596797 gb|AAK28276.2| hemocyanin G-type [Enteroctopus dofleini]; hemocyanin G-type, units Oda to Odg OS=Octopus vulgaris OX=6645 GN=LOC115211670 PE=4 SV=2; 16596797 gb|AAK28276.2| hemocyanin G-type [Enteroctopus dofleini]	0	2	2	0.5169	0	1	1	1	555.292	1109.58	1109.58	0.28	0.00015	0/0	0	0	196045	HCD (High Energy Collision Dissociation)	MS2	0	100	23.0016	4196	4196	4188	MCMMCM34021207.raw	F7	1186	2.36	3	0.0001881	9.93x10⁻³	0.627
High	Sequest HT	Sequest HT (A2)	A	2	Unambiguous	CPEPDAINR	cPEPDAINR	C1(Carbamidomethyl)	8	A0A6P7SER3; Q9BJ58; O61363; A0A6P7SDC4; Q5XLV2; Cluster-58773.162319;orf1 len=2921 frame:3 start:24 end:8786 gi	hemocyanin 1-like OS=Octopus vulgaris OX=6645 GN=LOC115212215 PE=4 SV=2 Hemocyanin G-type (Fragment) OS=Enteroctopus dofleini OX=267067 PE=4 SV=2 Hemocyanin G-type, units Oda to Odg OS=Enteroctopus dofleini OX=267067 GN=ODHCY PE=1 SV=1 hemocyanin G-type, units Oda to Odg OS=Octopus vulgaris OX=6645 GN=LOC115211670 PE=4 SV=2 Hemocyanin A-type (Fragment) OS=Enteroctopus dofleini OX=267067 GN=HA PE=…	A0A6P7SER3; Cluster-58773.162316;orf1 len=2526 frame:3 start:24 end:7601 gi; Q9BJ58; O61363; A0A6P7SDC4; Cluster-58773.162317;orf1 len=187 frame:-3 start:561 end:1 gi; Q5XLV2; Cluster-58773.162319;orf1 len=2921 frame:3 start:24 end:8786 gi	hemocyanin 1-like OS=Octopus vulgaris OX=6645 GN=LOC115212215 PE=4 SV=2; 16596797 gb|AAK28276.2| hemocyanin G-type [Enteroctopus dofleini]; Hemocyanin G-type (Fragment) OS=Enteroctopus dofleini OX=267067 PE=4 SV=2; Hemocyanin G-type, units Oda to Odg OS=Enteroctopus dofleini OX=267067 GN=ODHCY PE=1 SV=1; hemocyanin G-type, units Oda to Odg OS=Octopus vulgaris OX=6645 GN=LOC115211670 PE=4 SV=2; 52…	0	2	2	0.6929	0	1	1	1	536.248	1071.49	1071.49	0.71	0.00038	0/0	0	0	461874	HCD (High Energy Collision Dissociation)	MS2	4.32329	100	22.974	4190	4190	4188	MCMMCM34021207.raw	F7	476	2.67	6	0.0001881	1.39x10⁻³	0.963
High	Sequest HT	Sequest HT (A2)	A	2	Unambiguous	MPDSCCCTLEGGK	mPDScccTLEGGK	N-Term(Prot)(Met-loss); C5(Carbamidomethyl); C6(Carbamidomethyl); C7(Carbamidomethyl)	1	A0A0L8HQM4	Uncharacterized protein OS=Octopus bimaculoides OX=37653 GN=OCBIM_22009888mg PE=4 SV=1	A0A0L8HQM4	Uncharacterized protein OS=Octopus bimaculoides OX=37653 GN=OCBIM_22009888mg PE=4 SV=1	0	2	2	0.8194	0	1	1	1	692.27	1383.53	1383.53	-0.46	-0.00032	0/0	0	0	214077	HCD (High Energy Collision Dissociation)	MS2	4.1872	100	22.8584	4169	4169	4166	MCMMCM34021207.raw	F7	45	2.27	1	0.0001881	6.69x10⁻⁵	1.481
High	Sequest HT	Sequest HT (A2)	A	2	Unambiguous	RDVSSLTHADMNTLRK	RDVSSLTHADmNTLRK	M11(Oxidation)	4	A0A6P7SER3; A0A6P7SDC4; Cluster-58773.162319;orf1 len=2921 frame:3 start:24 end:8786 gi	hemocyanin 1-like OS=Octopus vulgaris OX=6645 GN=LOC115212215 PE=4 SV=2 hemocyanin G-type, units Oda to Odg OS=Octopus vulgaris OX=6645 GN=LOC115211670 PE=4 SV=2 16596797 gb|AAK28276.2| hemocyanin G-type [Enteroctopus dofleini]	A0A6P7SER3; Cluster-58773.162316;orf1 len=2526 frame:3 start:24 end:7601 gi; A0A6P7SDC4; Cluster-58773.162319;orf1 len=2921 frame:3 start:24 end:8786 gi	hemocyanin 1-like OS=Octopus vulgaris OX=6645 GN=LOC115212215 PE=4 SV=2; 16596797 gb|AAK28276.2| hemocyanin G-type [Enteroctopus dofleini]; hemocyanin G-type, units Oda to Odg OS=Octopus vulgaris OX=6645 GN=LOC115211670 PE=4 SV=2; 16596797 gb|AAK28276.2| hemocyanin G-type [Enteroctopus dofleini]	2	4	4	0.4909	0	1	1	1	465.74	1859.94	1859.94	-1.14	-0.00053	0/0	0	0	483915	HCD (High Energy Collision Dissociation)	MS2	9.75012	70.383	22.805	4159	4159	4155	MCMMCM34021207.raw	F7	1415	5.5	3	0.0001881	2.23x10⁻⁴	1.275
High	Sequest HT	Sequest HT (A2)	A	2	Unambiguous	TGEGPHWEESTK	TGEGPHWEESTK		7	A0A6P7TFF2	regucalcin OS=Octopus vulgaris OX=6645 GN=LOC115222191 PE=3 SV=1	Cluster-58773.162962;orf1 len=304 frame:2 start:473 end:1384 gi; Cluster-58773.163726;orf1 len=317 frame:2 start:38 end:988 gi; A0A6P7TFF2; Cluster-58773.152399;orf1 len=317 frame:2 start:38 end:988 gi; A0A0L8FYT5; Cluster-58773.159131;orf1 len=237 frame:-1 start:713 end:3 gi; Cluster-58773.159134;orf1 len=191 frame:2 start:38 end:610 gi	762113209 ref|XP_011439356.1| PREDICTED: regucalcin-like [Crassostrea gigas]>gi|762113211|ref|XP_011439357.1| PREDICTED: regucalcin-like [Crassostrea gigas]>gi|405966469|gb|EKC31748.1| Regucalcin [Crassostrea gigas]; 762113209 ref|XP_011439356.1| PREDICTED: regucalcin-like [Crassostrea gigas]>gi|762113211|ref|XP_011439357.1| PREDICTED: regucalcin-like [Crassostrea gigas]>gi|405966469|gb|EKC31748.…	0	3	3	0.0711	0	1	1	1	453.205	1357.6	1357.6	-1.33	-0.0006	0/0	0	0	72129.6	HCD (High Energy Collision Dissociation)	MS2	25.5134	100	22.5103	4104	4104	4100	MCMMCM34021207.raw	F7	531	2.53	1	0.0001881	2.31x10⁻³	0.877
High	Sequest HT	Sequest HT (A2)	A	2	Unambiguous	STDSASGGETLDDR	STDSASGGETLDDR		22	A0A7E6FAL0	protein hu-li tai shao isoform X12 OS=Octopus vulgaris OX=6645 GN=LOC115218883 PE=3 SV=1	A0A7E6FAL0; A0A6P7T1W2; A0A7E6FC95; A0A812B2P4; A0A6P7T2W5; A0A0L8FXP2; A0A7E6FAJ5; A0A7E6F9Y9; A0A6P7T2V8; Cluster-58773.147692;orf1 len=704 frame:2 start:362 end:2473 gi; A0A812B691; Cluster-58773.147675;orf1 len=129 frame:-3 start:388 end:2 gi; Cluster-58773.147688;orf1 len=728 frame:2 start:362 end:2545 gi; A0A6P7T301; A0A7E6FAK0; A0A6P7T218; Cluster-58773.147687;orf1 len=47 frame:2 start:2 e…	protein hu-li tai shao isoform X12 OS=Octopus vulgaris OX=6645 GN=LOC115218883 PE=3 SV=1; protein hu-li tai shao isoform X11 OS=Octopus vulgaris OX=6645 GN=LOC115218883 PE=3 SV=1; protein hu-li tai shao isoform X9 OS=Octopus vulgaris OX=6645 GN=LOC115218883 PE=3 SV=1; ADD OS=Sepia pharaonis OX=158019 GN=SPHA_9980 PE=3 SV=1; protein hu-li tai shao isoform X14 OS=Octopus vulgaris OX=6645 GN=LOC1152…	0	2	2	0.6625	0	1	1	1	705.803	1410.6	1410.6	0.01	1e-05	0/0	0	0	95650.6	HCD (High Energy Collision Dissociation)	MS2	6.16911	100	22.3901	4083	4083	4078	MCMMCM34021207.raw	F7	249	3.17	1	0.0001881	5.96x10⁻⁵	1.5
High	Sequest HT	Sequest HT (A2)	A	2	Unambiguous	NPLPDKDTIKQEK	NPLPDKDTIKQEK		10	Cluster-58773.169829;orf1 len=170 frame:1 start:604 end:1113 gi; A0A6P7T9Z5	762093795 ref|XP_011429361.1| PREDICTED: uncharacterized protein LOC105329712 isoform X1 [Crassostrea gigas]>gi|762093797|ref|XP_011429362.1| PREDICTED: uncharacterized protein LOC105329712 isoform X1 [Crassostrea gigas]>gi|762093799|ref|XP_011429363.1| PREDICTED: uncharacterized protein LOC105329712 isoform X1 [Crassostrea gigas]>gi|405973201|gb|EKC37927.1| hypothetical protein CGI_10009700 [Cra…	Cluster-58773.169832;orf1 len=132 frame:1 start:604 end:999 sp; A0A0L8G8E3; A0A0L8G8H6; Cluster-58773.169827;orf1 len=156 frame:-3 start:469 end:2 gi; Cluster-58773.169829;orf1 len=170 frame:1 start:604 end:1113 gi; A0A0L8G8W5; A0A6P7TCQ2; A0A6P7T9Z5; A0A0L8G8W8; Cluster-58773.169826;orf1 len=118 frame:-3 start:355 end:2 gi	O17389 TYB_CAEEL Thymosin beta OS=Caenorhabditis elegans GN=tth-1 PE=1 SV=2; Uncharacterized protein OS=Octopus bimaculoides OX=37653 GN=OCBIM_22038101mg PE=3 SV=1; Uncharacterized protein OS=Octopus bimaculoides OX=37653 GN=OCBIM_22038101mg PE=3 SV=1; 762093803 ref|XP_011429365.1| PREDICTED: trichohyalin-like isoform X3 [Crassostrea gigas]; 762093795 ref|XP_011429361.1| PREDICTED: uncharacterize…	2	3	3	0.5352	0	1	1	1	509.278	1525.82	1525.82	-0.77	-0.00039	0/0	0	0	82592.4	HCD (High Energy Collision Dissociation)	MS2	26.493	100	22.3284	4072	4072	4067	MCMMCM34021207.raw	F7	1042	2.56	2	0.0001881	1.55x10⁻⁴	1.337
High	Sequest HT	Sequest HT (A2)	A	2	Unambiguous	GGEEVEEIKGANESK	GGEEVEEIKGANESK		1	Cluster-58773.192724;orf1 len=110 frame:1 start:409 end:738 gi	340369254 ref|XP_003383163.1| PREDICTED: thioredoxin-like [Amphimedon queenslandica]	Cluster-58773.192724;orf1 len=110 frame:1 start:409 end:738 gi	340369254 ref|XP_003383163.1| PREDICTED: thioredoxin-like [Amphimedon queenslandica]	1	3	3	0.4141	0	1	1	1	525.921	1575.75	1575.75	-0.85	-0.00044	0/0	0	0	533775	HCD (High Energy Collision Dissociation)	MS2	0	95.773	23.0305	4200	4200	4199	MCMMCM34021207.raw	F7	1091	3.84	1	0.0001881	1.43x10⁻⁵	1.744
High	Sequest HT	Sequest HT (A2)	A	2	Unambiguous	AAPVCDVHPNEQR	AAPVcDVHPNEQR	C5(Carbamidomethyl)	3	A0A6P7T9A3	lysosomal alpha-glucosidase-like OS=Octopus vulgaris OX=6645 GN=LOC115220794 PE=3 SV=1	Cluster-58773.41270;orf1 len=367 frame:-1 start:1103 end:3 gi; Cluster-58773.43094;orf1 len=1083 frame:1 start:346 end:3594 gi; A0A6P7T9A3	675848904 ref|XP_009010012.1| hypothetical protein HELRODRAFT_96716 [Helobdella robusta]>gi|555708291|gb|ESO11524.1| hypothetical protein HELRODRAFT_96716 [Helobdella robusta]; 443729880 gb|ELU15628.1| hypothetical protein CAPTEDRAFT_167453 [Capitella teleta]; lysosomal alpha-glucosidase-like OS=Octopus vulgaris OX=6645 GN=LOC115220794 PE=3 SV=1	0	3	3	0.5851	0	1	1	1	498.235	1492.69	1492.7	-3.23	-0.00161	0/0	0	0	82767.3	HCD (High Energy Collision Dissociation)	MS2	23.9547	100	20.8968	3808	3808	3803	MCMMCM34021207.raw	F7	897	1.88	1	0.0001881	1.70x10⁻³	0.93
High	Sequest HT	Sequest HT (A2)	A	2	Unambiguous	DGDVGATGPQGVR	DGDVGATGPQGVR		16	A0A7E6EWW0	collagen alpha-1(I) chain isoform X1 OS=Octopus vulgaris OX=6645 GN=LOC115212770 PE=4 SV=1	Cluster-58773.175838;orf1 len=1225 frame:2 start:545 end:4219 gi; Cluster-58773.175831;orf1 len=1302 frame:2 start:545 end:4450 gi; Cluster-58773.175832;orf1 len=977 frame:3 start:780 end:3710 gi; A0A7E6EWW0; A0A7E6EW69; Cluster-58773.175836;orf1 len=1020 frame:2 start:545 end:3604 gi; A0A6P7SGJ2; Cluster-58773.175839;orf1 len=1303 frame:-1 start:4377 end:469 gi; Cluster-58773.175825;orf1 len=128…	871219081 ref|XP_012935509.1| PREDICTED: collagen alpha-1(III) chain-like [Aplysia californica]; 871219081 ref|XP_012935509.1| PREDICTED: collagen alpha-1(III) chain-like [Aplysia californica]; 871219081 ref|XP_012935509.1| PREDICTED: collagen alpha-1(III) chain-like [Aplysia californica]; collagen alpha-1(I) chain isoform X1 OS=Octopus vulgaris OX=6645 GN=LOC115212770 PE=4 SV=1; collagen alpha-1…	0	2	2	0.5082	0	1	1	1	614.801	1228.59	1228.59	2.5	0.00154	0/0	0	0	134577	HCD (High Energy Collision Dissociation)	MS2	16.5904	100	25.904	4736	4736	4727	MCMMCM34021207.raw	F7	858	3.05	1	0.0001881	4.37x10⁻⁵	1.553
High	Sequest HT	Sequest HT (A2)	A	2	Unambiguous	VDVSYETK	VDVSYETK		1	Cluster-58773.214625;orf1 len=76 frame:-2 start:394 end:167 gi	676443781 ref|XP_009050218.1| hypothetical protein LOTGIDRAFT_226396 [Lottia gigantea]>gi|556110456|gb|ESO99107.1| hypothetical protein LOTGIDRAFT_226396 [Lottia gigantea]	Cluster-58773.214625;orf1 len=76 frame:-2 start:394 end:167 gi	676443781 ref|XP_009050218.1| hypothetical protein LOTGIDRAFT_226396 [Lottia gigantea]>gi|556110456|gb|ESO99107.1| hypothetical protein LOTGIDRAFT_226396 [Lottia gigantea]	0	2	2	0.5422	0	1	1	1	470.736	940.464	940.462	1.85	0.00087	0/0	0	0	1.71817e+06	HCD (High Energy Collision Dissociation)	MS2	4.46519	35.297	25.9872	4750	4750	4749	MCMMCM34021207.raw	F7	705	2.25	1	0.0001881	1.69x10⁻²	0.535
High	Sequest HT	Sequest HT (A2)	A	2	Unambiguous	LSASDPQTTPVR	LSASDPQTTPVR		7	A0A6P7TKE4	probable aminopeptidase NPEPL1 isoform X1 OS=Octopus vulgaris OX=6645 GN=LOC115223934 PE=3 SV=1	Cluster-58773.184265;orf1 len=133 frame:-3 start:399 end:1 gi; A0A6P7TKE4; A0A6P7TNG7; Cluster-58773.200297;orf1 len=422 frame:3 start:3 end:1268 gi; Cluster-58773.200292;orf1 len=533 frame:3 start:3 end:1601 gi; Cluster-58773.200295;orf1 len=562 frame:3 start:3 end:1688 gi; Cluster-58773.200290;orf1 len=542 frame:3 start:3 end:1628 gi	646718814 gb|KDR21148.1| putative aminopeptidase NPEPL1 [Zootermopsis nevadensis]; probable aminopeptidase NPEPL1 isoform X1 OS=Octopus vulgaris OX=6645 GN=LOC115223934 PE=3 SV=1; probable aminopeptidase NPEPL1 isoform X2 OS=Octopus vulgaris OX=6645 GN=LOC115223934 PE=3 SV=1; 762158801 ref|XP_011417591.1| PREDICTED: probable aminopeptidase NPEPL1 [Crassostrea gigas]>gi|405949954|gb|EKC17964.1| Pu…	0	2	2	0.5137	0	1	1	1	636.333	1271.66	1271.66	-0.12	-8e-05	0/0	0	0	175589	HCD (High Energy Collision Dissociation)	MS2	9.9689	100	28.1983	5161	5161	5156	MCMMCM34021207.raw	F7	1215	2.92	1	0.0001881	1.15x10⁻⁴	1.389
High	Sequest HT	Sequest HT (A2)	A	2	Unambiguous	EALEANEVAEK	EALEANEVAEK		6	Cluster-58773.180614;orf1 len=593 frame:1 start:1273 end:3051 gi	762078274 ref|XP_011453109.1| PREDICTED: radixin-like isoform X3 [Crassostrea gigas]>gi|762078276|ref|XP_011453118.1| PREDICTED: radixin-like isoform X4 [Crassostrea gigas]	A0A6P7TVA5; A0A6P7TLG6; A0A7E6FS61; Cluster-58773.180614;orf1 len=593 frame:1 start:1273 end:3051 gi; A0A7E6FS44; Cluster-58773.180608;orf1 len=592 frame:1 start:1282 end:3057 gi	moesin isoform X4 OS=Octopus vulgaris OX=6645 GN=LOC115225885 PE=4 SV=1; moesin isoform X3 OS=Octopus vulgaris OX=6645 GN=LOC115225885 PE=4 SV=1; moesin isoform X2 OS=Octopus vulgaris OX=6645 GN=LOC115225885 PE=4 SV=1; 762078274 ref|XP_011453109.1| PREDICTED: radixin-like isoform X3 [Crassostrea gigas]>gi|762078276|ref|XP_011453118.1| PREDICTED: radixin-like isoform X4 [Crassostrea gigas]; moesin…	0	2	2	0.4583	0	1	1	1	601.798	1202.59	1202.59	-0.2	-0.00012	0/0	0	0	207934	HCD (High Energy Collision Dissociation)	MS2	20.9139	100	28.1937	5160	5160	5156	MCMMCM34021207.raw	F7	1147	2.64	1	0.0001881	2.33x10⁻⁴	1.268
High	Sequest HT	Sequest HT (A2)	A	2	Unambiguous	ELATQNGGFNR	ELATQNGGFNR		2	Cluster-58773.109972;orf1 len=856 frame:2 start:89 end:2656 gi	762142591 ref|XP_011454520.1| PREDICTED: inter-alpha-trypsin inhibitor heavy chain H3-like [Crassostrea gigas]	Cluster-58773.109972;orf1 len=856 frame:2 start:89 end:2656 gi; Cluster-58773.109974;orf1 len=652 frame:3 start:99 end:2054 gi	762142591 ref|XP_011454520.1| PREDICTED: inter-alpha-trypsin inhibitor heavy chain H3-like [Crassostrea gigas]; 405957680 gb|EKC23874.1| Inter-alpha-trypsin inhibitor heavy chain H3 [Crassostrea gigas]	0	2	2	0.5088	0	1	1	1	603.796	1206.58	1206.59	-1.4	-0.00084	0/0	0	0	160190	HCD (High Energy Collision Dissociation)	MS2	16.9682	100	28.1021	5144	5144	5134	MCMMCM34021207.raw	F7	1181	2.83	1	0.0001881	1.57x10⁻⁴	1.336
High	Sequest HT	Sequest HT (A2)	A	2	Unambiguous	TNQPTHFVVDCK	TNQPTHFVVDcK	C11(Carbamidomethyl)	9	A0A7E6FE51	filamin-A isoform X1 OS=Octopus vulgaris OX=6645 GN=LOC115220251 PE=3 SV=1	Cluster-58773.156212;orf1 len=2403 frame:1 start:685 end:7893 gi; A0A0L8H0B6; A0A7E6FE51; A0A0L8H1I7; A0A0L8H0J5; A0A7E6FGP0; A0A0L8H0B8; A0A0L8H0C0; A0A0L8H027	675879758 ref|XP_009025403.1| hypothetical protein HELRODRAFT_186524 [Helobdella robusta]>gi|555692947|gb|ESN96179.1| hypothetical protein HELRODRAFT_186524 [Helobdella robusta]; Calponin-homology (CH) domain-containing protein OS=Octopus bimaculoides OX=37653 GN=OCBIM_22024964mg PE=3 SV=1; filamin-A isoform X1 OS=Octopus vulgaris OX=6645 GN=LOC115220251 PE=3 SV=1; Calponin-homology (CH) domain-c…	0	3	3	0.5185	0	1	1	1	482.566	1445.68	1445.68	-0.36	-0.00017	0/0	0	0	257878	HCD (High Energy Collision Dissociation)	MS2	11.7578	100	28.0976	5143	5143	5134	MCMMCM34021207.raw	F7	840	2.43	1	0.0001881	1.79x10⁻³	0.921
High	Sequest HT	Sequest HT (A2)	A	2	Unambiguous	NPAIGNLK	NPAIGNLK		2	Cluster-58773.172049;orf1 len=413 frame:1 start:1 end:1239 gi	657587462 ref|XP_008298024.1| PREDICTED: heme-binding protein 2-like [Stegastes partitus]	A0A6P7TUI8; Cluster-58773.172049;orf1 len=413 frame:1 start:1 end:1239 gi	uncharacterized protein LOC115225721 OS=Octopus vulgaris OX=6645 GN=LOC115225721 PE=3 SV=1; 657587462 ref|XP_008298024.1| PREDICTED: heme-binding protein 2-like [Stegastes partitus]	0	2	2	0.3615	0	1	1	1	413.743	826.478	826.478	0.26	0.00011	0/0	0	0	401581	HCD (High Energy Collision Dissociation)	MS2	29.1639	100	28.093	5142	5142	5134	MCMMCM34021207.raw	F7	538	2.13	1	0.0001881	1.62x10⁻²	0.542
High	Sequest HT	Sequest HT (A2)	A	2	Unambiguous	EVHKIAAEGAIIR	EVHKIAAEGAIIR		1	A0A6P7SER3	hemocyanin 1-like OS=Octopus vulgaris OX=6645 GN=LOC115212215 PE=4 SV=2	A0A6P7SER3	hemocyanin 1-like OS=Octopus vulgaris OX=6645 GN=LOC115212215 PE=4 SV=2	1	3	3	0.5499	0	1	1	1	469.608	1406.81	1406.81	-1.04	-0.00049	0/0	0	0	151741	HCD (High Energy Collision Dissociation)	MS2	27.1227	100	28.0355	5131	5131	5123	MCMMCM34021207.raw	F7	577	4.11	1	0.0001881	1.96x10⁻⁵	1.69
High	Sequest HT	Sequest HT (A2)	A	2	Unambiguous	AYGPGLER	AYGPGLER		9	A0A7E6FE51	filamin-A isoform X1 OS=Octopus vulgaris OX=6645 GN=LOC115220251 PE=3 SV=1	Cluster-58773.156212;orf1 len=2403 frame:1 start:685 end:7893 gi; A0A0L8H0B6; A0A7E6FE51; A0A0L8H1I7; A0A0L8H0J5; A0A7E6FGP0; A0A0L8H0B8; A0A0L8H0C0; A0A0L8H027	675879758 ref|XP_009025403.1| hypothetical protein HELRODRAFT_186524 [Helobdella robusta]>gi|555692947|gb|ESN96179.1| hypothetical protein HELRODRAFT_186524 [Helobdella robusta]; Calponin-homology (CH) domain-containing protein OS=Octopus bimaculoides OX=37653 GN=OCBIM_22024964mg PE=3 SV=1; filamin-A isoform X1 OS=Octopus vulgaris OX=6645 GN=LOC115220251 PE=3 SV=1; Calponin-homology (CH) domain-c…	0	2	2	0.5309	0	1	1	1	431.724	862.441	862.442	-0.59	-0.00026	0/0	0	0	179360	HCD (High Energy Collision Dissociation)	MS2	15.7721	100	28.0217	5128	5128	5123	MCMMCM34021207.raw	F7	1568	1.94	1	0.0001881	7.14x10⁻³	0.684
High	Sequest HT	Sequest HT (A2)	A	2	Unambiguous	SLDSYGTGTTATK	SLDSYGTGTTATK		4	A0A6P7ST76	elongation factor 1-beta OS=Octopus vulgaris OX=6645 GN=LOC115216350 PE=3 SV=1	A0A6P7ST76; Cluster-58773.163130;orf1 len=231 frame:1 start:784 end:1476 gi; Cluster-58773.167986;orf1 len=150 frame:1 start:784 end:1233 gi; Cluster-58773.163129;orf1 len=236 frame:1 start:784 end:1491 gi	elongation factor 1-beta OS=Octopus vulgaris OX=6645 GN=LOC115216350 PE=3 SV=1; 157818179 ref|NP_001102269.1| elongation factor 1-beta [Rattus norvegicus]>gi|149046006|gb|EDL98899.1| rCG22471, isoform CRA_b [Rattus norvegicus]>gi|197245749|gb|AAI68738.1| Eukaryotic translation elongation factor 1 beta 2 [Rattus norvegicus]; 442093304 gb|AGC52715.1| eukaryotic translation elongation factor 1 beta …	0	2	2	0.7045	0	1	1	1	651.315	1301.62	1301.62	1.06	0.00069	0/0	0	0	217197	HCD (High Energy Collision Dissociation)	MS2	3.0337	100	27.89	5104	5104	5101	MCMMCM34021207.raw	F7	881	2.64	1	0.0001881	2.98x10⁻⁶	2.011
High	Sequest HT	Sequest HT (A2)	A	2	Unambiguous	EVTGGTIQVNGK	EVTGGTIQVNGK		4	A0A6P7TDP8	sushi, von Willebrand factor type A, EGF and pentraxin domain-containing protein 1 isoform X1 OS=Octopus vulgaris OX=6645 GN=LOC115222969 PE=4 SV=1	A0A6P7TDP8; Cluster-58773.189638;orf1 len=768 frame:2 start:2 end:2305 gi; A0A7E6FJ00; Cluster-58773.189635;orf1 len=891 frame:2 start:2 end:2674 gi	sushi, von Willebrand factor type A, EGF and pentraxin domain-containing protein 1 isoform X1 OS=Octopus vulgaris OX=6645 GN=LOC115222969 PE=4 SV=1; 443711419 gb|ELU05207.1| hypothetical protein CAPTEDRAFT_227166 [Capitella teleta]; sushi, von Willebrand factor type A, EGF and pentraxin domain-containing protein 1 isoform X2 OS=Octopus vulgaris OX=6645 GN=LOC115222969 PE=4 SV=1; 443711419 gb|ELU0…	0	2	2	0.2514	0	1	1	1	601.822	1202.64	1202.64	-0.79	-0.00048	0/0	0	0	206968	HCD (High Energy Collision Dissociation)	MS2	32.9905	100	27.849	5097	5097	5090	MCMMCM34021207.raw	F7	1511	1.75	1	0.0001881	3.63x10⁻³	0.8
High	Sequest HT	Sequest HT (A2)	A	2	Unambiguous	TEIDQEKTEQELR	TEIDQEKTEQELR		8	Cluster-58773.169829;orf1 len=170 frame:1 start:604 end:1113 gi	762093795 ref|XP_011429361.1| PREDICTED: uncharacterized protein LOC105329712 isoform X1 [Crassostrea gigas]>gi|762093797|ref|XP_011429362.1| PREDICTED: uncharacterized protein LOC105329712 isoform X1 [Crassostrea gigas]>gi|762093799|ref|XP_011429363.1| PREDICTED: uncharacterized protein LOC105329712 isoform X1 [Crassostrea gigas]>gi|405973201|gb|EKC37927.1| hypothetical protein CGI_10009700 [Cra…	Cluster-58773.169832;orf1 len=132 frame:1 start:604 end:999 sp; A0A0L8G8E3; A0A0L8G8H6; Cluster-58773.169827;orf1 len=156 frame:-3 start:469 end:2 gi; Cluster-58773.169829;orf1 len=170 frame:1 start:604 end:1113 gi; A0A0L8G8W5; A0A0L8G8W8; Cluster-58773.169826;orf1 len=118 frame:-3 start:355 end:2 gi	O17389 TYB_CAEEL Thymosin beta OS=Caenorhabditis elegans GN=tth-1 PE=1 SV=2; Uncharacterized protein OS=Octopus bimaculoides OX=37653 GN=OCBIM_22038101mg PE=3 SV=1; Uncharacterized protein OS=Octopus bimaculoides OX=37653 GN=OCBIM_22038101mg PE=3 SV=1; 762093803 ref|XP_011429365.1| PREDICTED: trichohyalin-like isoform X3 [Crassostrea gigas]; 762093795 ref|XP_011429361.1| PREDICTED: uncharacterize…	1	3	3	0.5378	0	1	1	1	540.269	1618.79	1618.79	-0.57	-0.00031	0/0	0	0	1.0983e+06	HCD (High Energy Collision Dissociation)	MS2	3.70352	41.712	27.8245	5091	5091	5090	MCMMCM34021207.raw	F7	1149	3.7	1	0.0001881	3.56x10⁻⁶	1.981
High	Sequest HT	Sequest HT (A2)	A	2	Unambiguous	FGAVSGPCEK	FGAVSGPcEK	C8(Carbamidomethyl)	6	Cluster-58773.124587;orf1 len=492 frame:3 start:93 end:1568 gi; A0A6P7U678	871246464 ref|XP_012940508.1| PREDICTED: uncharacterized protein LOC101848762 [Aplysia californica] collagen alpha-4(VI) chain OS=Octopus vulgaris OX=6645 GN=LOC115232146 PE=4 SV=2	Cluster-58773.191282;orf1 len=110 frame:-2 start:332 end:3 gi; Cluster-58773.124588;orf1 len=479 frame:3 start:93 end:1529 gi; Cluster-58773.124584;orf1 len=475 frame:3 start:93 end:1517 gi; Cluster-58773.124587;orf1 len=492 frame:3 start:93 end:1568 gi; A0A6P7U678; A0A0L8HJQ0	676495464 ref|XP_009066900.1| hypothetical protein LOTGIDRAFT_134745 [Lottia gigantea]>gi|556093743|gb|ESO82396.1| hypothetical protein LOTGIDRAFT_134745 [Lottia gigantea]; 676495464 ref|XP_009066900.1| hypothetical protein LOTGIDRAFT_134745 [Lottia gigantea]>gi|556093743|gb|ESO82396.1| hypothetical protein LOTGIDRAFT_134745 [Lottia gigantea]; 676495464 ref|XP_009066900.1| hypothetical protein LO…	0	2	2	0.5068	0	1	1	1	526.248	1051.49	1051.49	0.07	4e-05	0/0	0	0	570104	HCD (High Energy Collision Dissociation)	MS2	17.7903	100	27.7265	5074	5074	5068	MCMMCM34021207.raw	F7	798	2.92	2	0.0001881	1.64x10⁻⁴	1.327
High	Sequest HT	Sequest HT (A2)	A	2	Unambiguous	GLCGNYDHDPHNDFQK	GLcGNYDHDPHNDFQK	C3(Carbamidomethyl)	2	Cluster-123723.0;orf1 len=1033 frame:2 start:2 end:3100 gi	762085926 ref|XP_011425282.1| PREDICTED: mucin-17-like [Crassostrea gigas]	Cluster-41557.0;orf1 len=400 frame:2 start:2 end:1201 gi; Cluster-123723.0;orf1 len=1033 frame:2 start:2 end:3100 gi	762085926 ref|XP_011425282.1| PREDICTED: mucin-17-like [Crassostrea gigas]; 762085926 ref|XP_011425282.1| PREDICTED: mucin-17-like [Crassostrea gigas]	0	3	3	0.5625	0	1	1	1	639.605	1916.8	1916.8	0.61	0.00039	0/0	0	0	786565	HCD (High Energy Collision Dissociation)	MS2	0.652657	53.903	27.7227	5073	5073	5068	MCMMCM34021207.raw	F7	180	2.56	1	0.0001881	4.31x10⁻³	0.77
High	Sequest HT	Sequest HT (A2)	A	2	Unambiguous	GLCGNYDHDPHNDFQK	GLcGNYDHDPHNDFQK	C3(Carbamidomethyl)	2	Cluster-123723.0;orf1 len=1033 frame:2 start:2 end:3100 gi	762085926 ref|XP_011425282.1| PREDICTED: mucin-17-like [Crassostrea gigas]	Cluster-41557.0;orf1 len=400 frame:2 start:2 end:1201 gi; Cluster-123723.0;orf1 len=1033 frame:2 start:2 end:3100 gi	762085926 ref|XP_011425282.1| PREDICTED: mucin-17-like [Crassostrea gigas]; 762085926 ref|XP_011425282.1| PREDICTED: mucin-17-like [Crassostrea gigas]	0	4	4	0.3099	0	1	1	1	479.955	1916.8	1916.8	0.03	2e-05	0/0	0	0	1.10716e+06	HCD (High Energy Collision Dissociation)	MS2	7.71553	31.84	27.7194	5072	5072	5068	MCMMCM34021207.raw	F7	181	2.13	1	0.0001881	1.15x10⁻²	0.602
High	Sequest HT	Sequest HT (A2)	A	2	Unambiguous	RDVSSLTHADMNTLR	RDVSSLTHADmNTLR	M11(Oxidation)	4	A0A6P7SER3; A0A6P7SDC4; Cluster-58773.162319;orf1 len=2921 frame:3 start:24 end:8786 gi	hemocyanin 1-like OS=Octopus vulgaris OX=6645 GN=LOC115212215 PE=4 SV=2 hemocyanin G-type, units Oda to Odg OS=Octopus vulgaris OX=6645 GN=LOC115211670 PE=4 SV=2 16596797 gb|AAK28276.2| hemocyanin G-type [Enteroctopus dofleini]	A0A6P7SER3; Cluster-58773.162316;orf1 len=2526 frame:3 start:24 end:7601 gi; A0A6P7SDC4; Cluster-58773.162319;orf1 len=2921 frame:3 start:24 end:8786 gi	hemocyanin 1-like OS=Octopus vulgaris OX=6645 GN=LOC115212215 PE=4 SV=2; 16596797 gb|AAK28276.2| hemocyanin G-type [Enteroctopus dofleini]; hemocyanin G-type, units Oda to Odg OS=Octopus vulgaris OX=6645 GN=LOC115211670 PE=4 SV=2; 16596797 gb|AAK28276.2| hemocyanin G-type [Enteroctopus dofleini]	1	3	3	0.5653	0	1	1	1	577.954	1731.85	1731.84	1.71	0.00099	0/0	0	0	4397571	HCD (High Energy Collision Dissociation)	MS2	2.36312	9.289	27.7102	5069	5069	5068	MCMMCM34021207.raw	F7	1304	3.52	3	0.0001881	4.28x10⁻⁵	1.557
High	Sequest HT	Sequest HT (A2)	A	2	Unambiguous	NHGNQEQICATNCLGTR	NHGNQEQIcATNcLGTR	C9(Carbamidomethyl); C13(Carbamidomethyl)	1	A0A6P7TVV5	vitellogenin-like OS=Octopus vulgaris OX=6645 GN=LOC115227323 PE=4 SV=1	A0A6P7TVV5	vitellogenin-like OS=Octopus vulgaris OX=6645 GN=LOC115227323 PE=4 SV=1	0	3	3	0.7022	0	1	1	1	658.296	1972.87	1972.87	0.94	0.00061	0/0	0	0	140817	HCD (High Energy Collision Dissociation)	MS2	10.2031	100	27.6907	5067	5067	5057	MCMMCM34021207.raw	F7	535	3.19	1	0.0001881	3.02x10⁻⁴	1.224
High	Sequest HT	Sequest HT (A2)	A	2	Unambiguous	IQEACEELNR	IQEAcEELNR	C5(Carbamidomethyl)	5	A0A0L8H635	Uncharacterized protein OS=Octopus bimaculoides OX=37653 GN=OCBIM_22021483mg PE=3 SV=1	Cluster-58773.158716;orf1 len=187 frame:2 start:488 end:1048 gi; A0A0L8H635; Cluster-58773.158726;orf1 len=111 frame:3 start:585 end:917 gi; A0A6P7SV14; Cluster-58773.158724;orf1 len=173 frame:3 start:162 end:680 gi	795288454 ref|XP_011821119.1| PREDICTED: ADP-ribosylation factor 1 isoform X1 [Mandrillus leucophaeus]; Uncharacterized protein OS=Octopus bimaculoides OX=37653 GN=OCBIM_22021483mg PE=3 SV=1; 313231001 emb|CBY18999.1| unnamed protein product [Oikopleura dioica]; ADP-ribosylation factor 1-like 2 OS=Octopus vulgaris OX=6645 GN=LOC115216698 PE=3 SV=1; 617624767 ref|XP_007528204.1| PREDICTED: ADP-rib…	0	2	2	0.5902	0	1	1	1	631.296	1261.58	1261.58	0.1	6e-05	0/0	0	0	239917	HCD (High Energy Collision Dissociation)	MS2	0	100	27.6861	5066	5066	5057	MCMMCM34021207.raw	F7	773	2.66	1	0.0001881	4.74x10⁻⁵	1.539
High	Sequest HT	Sequest HT (A2)	A	2	Unambiguous	VAATVASIQK	VAATVASIQK		5	A0A0L8FU26	Uncharacterized protein OS=Octopus bimaculoides OX=37653 GN=OCBIM_22007935mg PE=4 SV=1	A0A0L8FU26; Cluster-58773.138645;orf1 len=372 frame:-1 start:1118 end:3 gi; A0A6P7S8P2; A0A0L8FU76; Cluster-58773.138646;orf1 len=790 frame:3 start:30 end:2399 gi	Uncharacterized protein OS=Octopus bimaculoides OX=37653 GN=OCBIM_22007935mg PE=4 SV=1; 443712905 gb|ELU05989.1| hypothetical protein CAPTEDRAFT_160712 [Capitella teleta]; 40S ribosomal protein S6 OS=Octopus vulgaris OX=6645 GN=LOC115210314 PE=3 SV=1; 40S ribosomal protein S6 OS=Octopus bimaculoides OX=37653 GN=OCBIM_22007935mg PE=3 SV=1; 117067150 gb|ABK32076.1| ribosomal protein S6 [Branchiosto…	0	2	2	0.3697	0	1	1	1	494.295	987.583	987.583	-0.02	-1e-05	0/0	0	0	148595	HCD (High Energy Collision Dissociation)	MS2	24.0931	100	27.6341	5056	5056	5046	MCMMCM34021207.raw	F7	860	1.65	1	0.0001881	6.57x10⁻³	0.698
High	Sequest HT	Sequest HT (A2)	A	2	Unambiguous	ENNPFHHAHIDVVNKDTTR	ENNPFHHAHIDVVNKDTTR		1	A0A6P7SER3	hemocyanin 1-like OS=Octopus vulgaris OX=6645 GN=LOC115212215 PE=4 SV=2	A0A6P7SER3	hemocyanin 1-like OS=Octopus vulgaris OX=6645 GN=LOC115212215 PE=4 SV=2	1	4	4	0.4075	0	1	1	1	561.779	2244.09	2244.09	1.18	0.00066	0/0	0	0	85207.7	HCD (High Energy Collision Dissociation)	MS2	27.4	100	28.2029	5162	5162	5156	MCMMCM34021207.raw	F7	1294	3.19	1	0.0001881	4.33x10⁻⁵	1.555
High	Sequest HT	Sequest HT (A2)	A	2	Unambiguous	KNVNSLTPTDIK	KNVNSLTPTDIK		1	A0A6P7SER3	hemocyanin 1-like OS=Octopus vulgaris OX=6645 GN=LOC115212215 PE=4 SV=2	A0A6P7SER3	hemocyanin 1-like OS=Octopus vulgaris OX=6645 GN=LOC115212215 PE=4 SV=2	1	2	2	0.0524	0	1	1	1	665.373	1329.74	1329.74	1.06	0.00071	0/0	0	0	2.96472e+06	HCD (High Energy Collision Dissociation)	MS2	1.38802	20.717	28.3602	5191	5191	5189	MCMMCM34021207.raw	F7	1264	4.39	1	0.0001881	1.92x10⁻⁶	2.086
High	Sequest HT	Sequest HT (A2)	A	2	Unambiguous	KNVNSLTPTDIK	KNVNSLTPTDIK		1	A0A6P7SER3	hemocyanin 1-like OS=Octopus vulgaris OX=6645 GN=LOC115212215 PE=4 SV=2	A0A6P7SER3	hemocyanin 1-like OS=Octopus vulgaris OX=6645 GN=LOC115212215 PE=4 SV=2	1	3	3	0.0637	0	1	1	1	443.917	1329.74	1329.74	0.27	0.00012	0/0	0	0	2.59414e+06	HCD (High Energy Collision Dissociation)	MS2	8.69502	17.304	28.3634	5192	5192	5189	MCMMCM34021207.raw	F7	1263	3.14	1	0.0001881	1.01x10⁻³	1.018
High	Sequest HT	Sequest HT (A2)	A	2	Unambiguous	ENNPFHHAHIDVVNK	ENNPFHHAHIDVVNK		1	A0A6P7SER3	hemocyanin 1-like OS=Octopus vulgaris OX=6645 GN=LOC115212215 PE=4 SV=2	A0A6P7SER3	hemocyanin 1-like OS=Octopus vulgaris OX=6645 GN=LOC115212215 PE=4 SV=2	0	3	3	0.3437	0	1	1	1	590.96	1770.87	1770.87	-0.71	-0.00042	0/0	0	0	826446	HCD (High Energy Collision Dissociation)	MS2	22.3787	50.589	28.4205	5204	5204	5200	MCMMCM34021207.raw	F7	1227	3.87	1	0.0001881	9.87x10⁻⁵	1.414
High	Sequest HT	Sequest HT (A2)	A	2	Unambiguous	STAGDTHLGGEDFDNK	STAGDTHLGGEDFDNK		4	A0A6P7T7L0	heat shock cognate 71 kDa protein OS=Octopus vulgaris OX=6645 GN=LOC115220772 PE=3 SV=1	A0A6P7T7L0; Cluster-58773.161631;orf1 len=298 frame:-3 start:894 end:1 gi; A0A0L8G3E9; Cluster-58773.161632;orf1 len=579 frame:1 start:1798 end:3534 gi	heat shock cognate 71 kDa protein OS=Octopus vulgaris OX=6645 GN=LOC115220772 PE=3 SV=1; 116282655 gb|ABJ97377.1| heat shock protein 70 [Pteria penguin]; Uncharacterized protein OS=Octopus bimaculoides OX=37653 GN=OCBIM_22001601mg PE=3 SV=1; 116282655 gb|ABJ97377.1| heat shock protein 70 [Pteria penguin]	0	3	3	0.5429	0	1	1	1	555.243	1663.72	1663.72	-2.15	-0.00119	0/0	0	0	316741	HCD (High Energy Collision Dissociation)	MS2	40.0112	100	29.1687	5348	5348	5343	MCMMCM34021207.raw	F7	314	2.45	1	0.0001881	1.07x10⁻²	0.614
High	Sequest HT	Sequest HT (A2)	A	2	Unambiguous	LCEEIPSK	LcEEIPSK	C2(Carbamidomethyl)	11	A0A6P7TAX3	allene oxide synthase-lipoxygenase protein isoform X1 OS=Octopus vulgaris OX=6645 GN=LOC115221275 PE=4 SV=1	A0A6P7T9S7; A0A0L8H303; A0A0L8H3N3; A0A6P7TAX3; A0A7E6F278; A0A6P7SRH0; A0A0L8I1P3; A0A7E6FH91; Cluster-58773.101435;orf1 len=169 frame:-3 start:507 end:1 gi; A0A0L8H317; A0A7E6F2S0	allene oxide synthase-lipoxygenase protein OS=Octopus vulgaris OX=6645 GN=LOC115221688 PE=4 SV=1; Uncharacterized protein OS=Octopus bimaculoides OX=37653 GN=OCBIM_22023409mg PE=4 SV=1; Uncharacterized protein OS=Octopus bimaculoides OX=37653 GN=OCBIM_22023412mg PE=4 SV=1; allene oxide synthase-lipoxygenase protein isoform X1 OS=Octopus vulgaris OX=6645 GN=LOC115221275 PE=4 SV=1; polyunsaturated …	0	2	2	0.1942	0	1	1	1	488.244	975.481	975.482	-0.39	-0.00019	0/0	0	0	183890	HCD (High Energy Collision Dissociation)	MS2	24.821	100	29.0693	5329	5329	5321	MCMMCM34021207.raw	F7	1348	2.06	1	0.0001881	3.49x10⁻³	0.806
High	Sequest HT	Sequest HT (A2)	A	2	Unambiguous	AAATPQHLFNYHK	AAATPQHLFNYHK		4	A0A6P7SER3; A0A6P7SDC4; Cluster-58773.162319;orf1 len=2921 frame:3 start:24 end:8786 gi	hemocyanin 1-like OS=Octopus vulgaris OX=6645 GN=LOC115212215 PE=4 SV=2 hemocyanin G-type, units Oda to Odg OS=Octopus vulgaris OX=6645 GN=LOC115211670 PE=4 SV=2 16596797 gb|AAK28276.2| hemocyanin G-type [Enteroctopus dofleini]	A0A6P7SER3; Cluster-58773.162316;orf1 len=2526 frame:3 start:24 end:7601 gi; A0A6P7SDC4; Cluster-58773.162319;orf1 len=2921 frame:3 start:24 end:8786 gi	hemocyanin 1-like OS=Octopus vulgaris OX=6645 GN=LOC115212215 PE=4 SV=2; 16596797 gb|AAK28276.2| hemocyanin G-type [Enteroctopus dofleini]; hemocyanin G-type, units Oda to Odg OS=Octopus vulgaris OX=6645 GN=LOC115211670 PE=4 SV=2; 16596797 gb|AAK28276.2| hemocyanin G-type [Enteroctopus dofleini]	0	2	2	0.5362	0	1	1	1	749.384	1497.76	1497.76	0.48	0.00036	0/0	0	0	434946	HCD (High Energy Collision Dissociation)	MS2	1.76844	100	29.0509	5325	5325	5321	MCMMCM34021207.raw	F7	1237	3.73	3	0.0001881	5.50x10⁻⁵	1.514
High	Sequest HT	Sequest HT (A2)	A	2	Unambiguous	SEVYSVCHSLK	SEVYSVcHSLK	C7(Carbamidomethyl)	5	A0A7E6F2Q3	SCO-spondin-like OS=Octopus vulgaris OX=6645 GN=LOC118764670 PE=4 SV=1	A0A0L8GF83; Cluster-58773.135546;orf1 len=1748 frame:1 start:202 end:5445 gi; Cluster-58773.135543;orf2 len=1040 frame:1 start:202 end:3321 gi; Cluster-109005.0;orf1 len=176 frame:-2 start:530 end:3 gi; A0A7E6F2Q3	Uncharacterized protein (Fragment) OS=Octopus bimaculoides OX=37653 GN=OCBIM_22035120mg PE=4 SV=1; 762085926 ref|XP_011425282.1| PREDICTED: mucin-17-like [Crassostrea gigas]; 762085926 ref|XP_011425282.1| PREDICTED: mucin-17-like [Crassostrea gigas]; 190609996 tpe|CAL69034.1| TPA: SCO-spondin protein [Strongylocentrotus purpuratus]; SCO-spondin-like OS=Octopus vulgaris OX=6645 GN=LOC118764670 PE=…	0	2	2	0.5714	0	1	1	1	654.816	1308.63	1308.63	0.14	9e-05	0/0	0	0	118657	HCD (High Energy Collision Dissociation)	MS2	0	100	29.0198	5320	5320	5310	MCMMCM34021207.raw	F7	1109	2.1	1	0.0001881	2.58x10⁻³	0.858
High	Sequest HT	Sequest HT (A2)	A	2	Unambiguous	NFCAGGNSLR	NFcAGGNSLR	C3(Carbamidomethyl)	1	Cluster-58773.172049;orf1 len=413 frame:1 start:1 end:1239 gi	657587462 ref|XP_008298024.1| PREDICTED: heme-binding protein 2-like [Stegastes partitus]	Cluster-58773.172049;orf1 len=413 frame:1 start:1 end:1239 gi	657587462 ref|XP_008298024.1| PREDICTED: heme-binding protein 2-like [Stegastes partitus]	0	2	2	0.4812	0	1	1	1	548.254	1095.5	1095.5	0.73	0.0004	0/0	0	0	1.42471e+06	HCD (High Energy Collision Dissociation)	MS2	15.7228	48.296	28.9886	5313	5313	5310	MCMMCM34021207.raw	F7	704	2.39	1	0.0001881	1.27x10⁻³	0.979
High	Sequest HT	Sequest HT (A2)	A	2	Unambiguous	CTNIGVVAR	cTNIGVVAR	C1(Carbamidomethyl)	6	A0A7E6FK29	mucin-19-like OS=Octopus vulgaris OX=6645 GN=LOC115224399 PE=4 SV=1	Cluster-123723.2;orf1 len=507 frame:3 start:2952 end:4472 gi; Cluster-123723.1;orf1 len=564 frame:3 start:2952 end:4643 gi; A0A0L8HYY1; Cluster-123723.3;orf2 len=488 frame:3 start:2952 end:4415 gi; A0A7E6FK29; Cluster-123723.0;orf2 len=555 frame:3 start:2952 end:4616 gi	762085926 ref|XP_011425282.1| PREDICTED: mucin-17-like [Crassostrea gigas]; 762085926 ref|XP_011425282.1| PREDICTED: mucin-17-like [Crassostrea gigas]; Uncharacterized protein OS=Octopus bimaculoides OX=37653 GN=OCBIM_22001740mg PE=4 SV=1; 762085926 ref|XP_011425282.1| PREDICTED: mucin-17-like [Crassostrea gigas]; mucin-19-like OS=Octopus vulgaris OX=6645 GN=LOC115224399 PE=4 SV=1; 762085926 ref|…	0	2	2	0.3265	0	1	1	1	495.264	989.52	989.52	0.47	0.00023	0/0	0	0	3583372	HCD (High Energy Collision Dissociation)	MS2	10.6047	16.508	28.9826	5311	5311	5310	MCMMCM34021207.raw	F7	1692	2.91	1	0.0001881	7.67x10⁻⁴	1.065
High	Sequest HT	Sequest HT (A2)	A	2	Unambiguous	SEVYSVCHSLK	SEVYSVcHSLK	C7(Carbamidomethyl)	5	A0A7E6F2Q3	SCO-spondin-like OS=Octopus vulgaris OX=6645 GN=LOC118764670 PE=4 SV=1	A0A0L8GF83; Cluster-58773.135546;orf1 len=1748 frame:1 start:202 end:5445 gi; Cluster-58773.135543;orf2 len=1040 frame:1 start:202 end:3321 gi; Cluster-109005.0;orf1 len=176 frame:-2 start:530 end:3 gi; A0A7E6F2Q3	Uncharacterized protein (Fragment) OS=Octopus bimaculoides OX=37653 GN=OCBIM_22035120mg PE=4 SV=1; 762085926 ref|XP_011425282.1| PREDICTED: mucin-17-like [Crassostrea gigas]; 762085926 ref|XP_011425282.1| PREDICTED: mucin-17-like [Crassostrea gigas]; 190609996 tpe|CAL69034.1| TPA: SCO-spondin protein [Strongylocentrotus purpuratus]; SCO-spondin-like OS=Octopus vulgaris OX=6645 GN=LOC118764670 PE=…	0	3	3	0.5628	0	1	1	1	436.88	1308.62	1308.63	-0.76	-0.00033	0/0	0	0	89861.8	HCD (High Energy Collision Dissociation)	MS2	24.0893	100	28.9627	5309	5309	5299	MCMMCM34021207.raw	F7	1116	2.31	1	0.0001881	2.86x10⁻⁴	1.233
High	Sequest HT	Sequest HT (A2)	A	2	Unambiguous	AAATPQHLFNYHK	AAATPQHLFNYHK		4	A0A6P7SER3; A0A6P7SDC4; Cluster-58773.162319;orf1 len=2921 frame:3 start:24 end:8786 gi	hemocyanin 1-like OS=Octopus vulgaris OX=6645 GN=LOC115212215 PE=4 SV=2 hemocyanin G-type, units Oda to Odg OS=Octopus vulgaris OX=6645 GN=LOC115211670 PE=4 SV=2 16596797 gb|AAK28276.2| hemocyanin G-type [Enteroctopus dofleini]	A0A6P7SER3; Cluster-58773.162316;orf1 len=2526 frame:3 start:24 end:7601 gi; A0A6P7SDC4; Cluster-58773.162319;orf1 len=2921 frame:3 start:24 end:8786 gi	hemocyanin 1-like OS=Octopus vulgaris OX=6645 GN=LOC115212215 PE=4 SV=2; 16596797 gb|AAK28276.2| hemocyanin G-type [Enteroctopus dofleini]; hemocyanin G-type, units Oda to Odg OS=Octopus vulgaris OX=6645 GN=LOC115211670 PE=4 SV=2; 16596797 gb|AAK28276.2| hemocyanin G-type [Enteroctopus dofleini]	0	3	3	0.4522	0	1	1	1	499.924	1497.76	1497.76	-1.33	-0.00066	0/0	0	0	146645	HCD (High Energy Collision Dissociation)	MS2	30.071	100	28.9443	5305	5305	5299	MCMMCM34021207.raw	F7	1253	3.14	3	0.0001881	2.50x10⁻³	0.864
High	Sequest HT	Sequest HT (A2)	A	2	Unambiguous	YGNVWKPAGTK	YGNVWKPAGTK		2	Cluster-123723.0;orf1 len=1033 frame:2 start:2 end:3100 gi; A0A7E6FK29	762085926 ref|XP_011425282.1| PREDICTED: mucin-17-like [Crassostrea gigas] mucin-19-like OS=Octopus vulgaris OX=6645 GN=LOC115224399 PE=4 SV=1	Cluster-123723.0;orf1 len=1033 frame:2 start:2 end:3100 gi; A0A7E6FK29	762085926 ref|XP_011425282.1| PREDICTED: mucin-17-like [Crassostrea gigas]; mucin-19-like OS=Octopus vulgaris OX=6645 GN=LOC115224399 PE=4 SV=1	0	2	2	0.6467	0	1	1	1	610.824	1220.64	1220.64	-0.47	-0.00029	0/0	0	0	531323	HCD (High Energy Collision Dissociation)	MS2	3.90318	100	27.5973	5048	5048	5046	MCMMCM34021207.raw	F7	1513	3	2	0.0001881	1.27x10⁻⁴	1.371
High	Sequest HT	Sequest HT (A2)	A	2	Unambiguous	CKDAELFASESQK	cKDAELFASESQK	C1(Carbamidomethyl)	8	A0A7E6ESM7; A0A7E6ET53	tropomyosin Tod p 1.0102 isoform X14 OS=Octopus vulgaris OX=6645 GN=LOC115210626 PE=3 SV=1 tropomyosin Tod p 1.0102 isoform X5 OS=Octopus vulgaris OX=6645 GN=LOC115210626 PE=3 SV=1	A0A7E6ESM7; A0A7E6EQM4; A0A7E6ERK2; A0A7E6ERJ7; Cluster-58773.159340;orf1 len=125 frame:3 start:1944 end:2318 gi; Cluster-58773.159323;orf1 len=188 frame:1 start:1639 end:2202 gi; A0A7E6ET53; A0A7E6ET63	tropomyosin Tod p 1.0102 isoform X14 OS=Octopus vulgaris OX=6645 GN=LOC115210626 PE=3 SV=1; tropomyosin Tod p 1.0102 isoform X15 OS=Octopus vulgaris OX=6645 GN=LOC115210626 PE=3 SV=1; tropomyosin Tod p 1.0102 isoform X17 OS=Octopus vulgaris OX=6645 GN=LOC115210626 PE=3 SV=1; tropomyosin Tod p 1.0102 isoform X12 OS=Octopus vulgaris OX=6645 GN=LOC115210626 PE=3 SV=1; 42559693 sp|Q9GZ71.1|TPM_HALDV …	1	3	3	0.4567	0	1	1	1	504.904	1512.7	1512.7	-1.13	-0.00057	0/0	0	0	112518	HCD (High Energy Collision Dissociation)	MS2	57.0467	100	28.9014	5298	5298	5288	MCMMCM34021207.raw	F7	761	3.35	2	0.0001881	4.12x10⁻⁴	1.171
High	Sequest HT	Sequest HT (A2)	A	2	Unambiguous	CKDNIGDTYVCSCR	cKDNIGDTYVcScR	C1(Carbamidomethyl); C11(Carbamidomethyl); C13(Carbamidomethyl)	5	A0A7E6EVN8	mucin-like protein OS=Octopus vulgaris OX=6645 GN=LOC115213503 PE=4 SV=1	Cluster-58773.84428;orf1 len=1302 frame:1 start:1 end:3906 gi; A0A7E6EVN8; Cluster-58773.84427;orf2 len=1057 frame:1 start:1 end:3171 gi; Cluster-58773.84430;orf1 len=1319 frame:1 start:1 end:3957 gi; Cluster-58773.84429;orf1 len=1366 frame:1 start:1 end:4098 gi	847132402 ref|XP_012819335.1| PREDICTED: mucin-like protein [Xenopus (Silurana) tropicalis]; mucin-like protein OS=Octopus vulgaris OX=6645 GN=LOC115213503 PE=4 SV=1; 313240015 emb|CBY32374.1| unnamed protein product [Oikopleura dioica]; 847132402 ref|XP_012819335.1| PREDICTED: mucin-like protein [Xenopus (Silurana) tropicalis]; 847132402 ref|XP_012819335.1| PREDICTED: mucin-like protein [Xenopus…	1	3	3	0.6988	0	1	1	1	583.244	1747.72	1747.72	-0.61	-0.00036	0/0	0	0	702908	HCD (High Energy Collision Dissociation)	MS2	6.00986	76.603	28.7506	5269	5269	5266	MCMMCM34021207.raw	F7	107	4.25	1	0.0001881	6.45x10⁻⁶	1.879
High	Sequest HT	Sequest HT (A2)	A	2	Unambiguous	SMMSPEATIK	SmMSPEATIK	M2(Oxidation)	3	A0A6P7SI10; Cluster-58773.163438;orf1 len=994 frame:2 start:254 end:3235 gi	CD109 antigen isoform X2 OS=Octopus vulgaris OX=6645 GN=LOC115213260 PE=4 SV=1 410935705 gb|AFV94409.1| thioester-containing protein 1 [Euprymna scolopes]	A0A6P7SI10; A0A7E6F3R1; Cluster-58773.163438;orf1 len=994 frame:2 start:254 end:3235 gi	CD109 antigen isoform X2 OS=Octopus vulgaris OX=6645 GN=LOC115213260 PE=4 SV=1; CD109 antigen isoform X1 OS=Octopus vulgaris OX=6645 GN=LOC115213260 PE=4 SV=1; 410935705 gb|AFV94409.1| thioester-containing protein 1 [Euprymna scolopes]	0	2	2	0.0934	0	1	1	1	555.761	1110.51	1110.52	-2.19	-0.00121	0/0	0	0	700538	HCD (High Energy Collision Dissociation)	MS2	3.35609	88.647	28.6935	5258	5258	5255	MCMMCM34021207.raw	F7	820	2.57	2	0.0001881	2.29x10⁻³	0.878
High	Sequest HT	Sequest HT (A2)	A	2	Unambiguous	VAVCVPTDDKR	VAVcVPTDDKR	C4(Carbamidomethyl)	3	A0A6P7SER3; Cluster-58773.162319;orf1 len=2921 frame:3 start:24 end:8786 gi	hemocyanin 1-like OS=Octopus vulgaris OX=6645 GN=LOC115212215 PE=4 SV=2 16596797 gb|AAK28276.2| hemocyanin G-type [Enteroctopus dofleini]	A0A6P7SER3; Cluster-58773.162316;orf1 len=2526 frame:3 start:24 end:7601 gi; Cluster-58773.162319;orf1 len=2921 frame:3 start:24 end:8786 gi	hemocyanin 1-like OS=Octopus vulgaris OX=6645 GN=LOC115212215 PE=4 SV=2; 16596797 gb|AAK28276.2| hemocyanin G-type [Enteroctopus dofleini]; 16596797 gb|AAK28276.2| hemocyanin G-type [Enteroctopus dofleini]	1	3	3	0.6379	0	1	1	1	420.552	1259.64	1259.64	-0.97	-0.00041	0/0	0	0	928798	HCD (High Energy Collision Dissociation)	MS2	4.72891	54.433	28.6898	5257	5257	5255	MCMMCM34021207.raw	F7	1291	3.01	2	0.0001881	6.92x10⁻⁴	1.082
High	Sequest HT	Sequest HT (A2)	A	2	Unambiguous	ICEEISEEVKK	IcEEISEEVKK	C2(Carbamidomethyl)	5	Cluster-58773.163293;orf1 len=95 frame:3 start:567 end:851 gi	871243797 ref|XP_012940045.1| PREDICTED: uncharacterized protein LOC101860584 [Aplysia californica]	A0A7E6EHE9; A0A7E6EGR3; Cluster-58773.163292;orf1 len=88 frame:-3 start:265 end:2 gi; Cluster-58773.163293;orf1 len=95 frame:3 start:567 end:851 gi; Cluster-58773.163295;orf1 len=89 frame:3 start:567 end:833 gi	prosaposin isoform X1 OS=Octopus vulgaris OX=6645 GN=LOC115209891 PE=4 SV=1; prosaposin isoform X2 OS=Octopus vulgaris OX=6645 GN=LOC115209891 PE=4 SV=1; 780104507 ref|XP_011675693.1| PREDICTED: proactivator polypeptide [Strongylocentrotus purpuratus]; 871243797 ref|XP_012940045.1| PREDICTED: uncharacterized protein LOC101860584 [Aplysia californica]; 91077504 ref|XP_966852.1| PREDICTED: prosapos…	1	3	3	0.4313	0	1	1	1	455.23	1363.68	1363.68	-1.14	-0.00052	0/0	0	0	552036	HCD (High Energy Collision Dissociation)	MS2	3.89335	100	28.5465	5229	5229	5222	MCMMCM34021207.raw	F7	1522	2.11	1	0.0001881	2.22x10⁻³	0.884
High	Sequest HT	Sequest HT (A2)	A	2	Unambiguous	LSAPGTLK	LSAPGTLK		1	A0A6P7SQZ9	uncharacterized protein LOC115215599 OS=Octopus vulgaris OX=6645 GN=LOC115215599 PE=4 SV=1	A0A6P7SQZ9	uncharacterized protein LOC115215599 OS=Octopus vulgaris OX=6645 GN=LOC115215599 PE=4 SV=1	0	2	2	0.3448	0	1	1	1	393.739	786.47	786.472	-2.83	-0.00111	0/0	0	0	129102	HCD (High Energy Collision Dissociation)	MS2	61.674	100	28.5069	5221	5221	5211	MCMMCM34021207.raw	F7	1180	2.03	1	0.0001881	1.37x10⁻²	0.571
High	Sequest HT	Sequest HT (A2)	A	2	Unambiguous	SLTTEEEHELR	SLTTEEEHELR		5	A0A6P7SER3; A0A6P7SDC4; Cluster-58773.162319;orf1 len=2921 frame:3 start:24 end:8786 gi	hemocyanin 1-like OS=Octopus vulgaris OX=6645 GN=LOC115212215 PE=4 SV=2 hemocyanin G-type, units Oda to Odg OS=Octopus vulgaris OX=6645 GN=LOC115211670 PE=4 SV=2 16596797 gb|AAK28276.2| hemocyanin G-type [Enteroctopus dofleini]	A0A6P7SER3; Cluster-58773.162316;orf1 len=2526 frame:3 start:24 end:7601 gi; A0A6P7SDC4; Cluster-58773.162317;orf1 len=187 frame:-3 start:561 end:1 gi; Cluster-58773.162319;orf1 len=2921 frame:3 start:24 end:8786 gi	hemocyanin 1-like OS=Octopus vulgaris OX=6645 GN=LOC115212215 PE=4 SV=2; 16596797 gb|AAK28276.2| hemocyanin G-type [Enteroctopus dofleini]; hemocyanin G-type, units Oda to Odg OS=Octopus vulgaris OX=6645 GN=LOC115211670 PE=4 SV=2; 52550954 gb|AAU84460.1| hemocyanin A-type [Enteroctopus dofleini]; 16596797 gb|AAK28276.2| hemocyanin G-type [Enteroctopus dofleini]	0	3	3	0.5139	0	1	1	1	448.552	1343.64	1343.64	-2.17	-0.00097	0/0	0	0	224378	HCD (High Energy Collision Dissociation)	MS2	32.0493	100	28.4884	5217	5217	5211	MCMMCM34021207.raw	F7	797	3.23	3	0.0001881	1.16x10⁻⁴	1.387
High	Sequest HT	Sequest HT (A2)	A	2	Unambiguous	ENNPFHHAHIDVVNK	ENNPFHHAHIDVVNK		1	A0A6P7SER3	hemocyanin 1-like OS=Octopus vulgaris OX=6645 GN=LOC115212215 PE=4 SV=2	A0A6P7SER3	hemocyanin 1-like OS=Octopus vulgaris OX=6645 GN=LOC115212215 PE=4 SV=2	0	2	2	0.6253	0	1	1	1	885.938	1770.87	1770.87	0.55	0.00048	0/0	0	0	340788	HCD (High Energy Collision Dissociation)	MS2	0	100	28.4697	5213	5213	5211	MCMMCM34021207.raw	F7	1298	4.27	1	0.0001881	3.13x10⁻⁶	2.002
High	Sequest HT	Sequest HT (A2)	A	2	Unambiguous	QFTCSISGK	QFTcSISGK	C4(Carbamidomethyl)	4	A0A7E6F2Q3	SCO-spondin-like OS=Octopus vulgaris OX=6645 GN=LOC118764670 PE=4 SV=1	Cluster-58773.135546;orf1 len=1748 frame:1 start:202 end:5445 gi; Cluster-58773.135545;orf1 len=202 frame:-1 start:606 end:1 gi; A0A7E6F2Q3; Cluster-58773.135543;orf1 len=724 frame:2 start:3260 end:5431 gi	762085926 ref|XP_011425282.1| PREDICTED: mucin-17-like [Crassostrea gigas]; 847173661 ref|XP_012809901.1| PREDICTED: SCO-spondin isoform X1 [Xenopus (Silurana) tropicalis]; SCO-spondin-like OS=Octopus vulgaris OX=6645 GN=LOC118764670 PE=4 SV=1; 762085926 ref|XP_011425282.1| PREDICTED: mucin-17-like [Crassostrea gigas]	0	2	2	0.4449	0	1	1	1	514.247	1027.49	1027.49	-1.48	-0.00076	0/0	0	0	402478	HCD (High Energy Collision Dissociation)	MS2	27.9262	100	28.4282	5206	5206	5200	MCMMCM34021207.raw	F7	740	2.36	1	0.0001881	1.27x10⁻³	0.978
High	Sequest HT	Sequest HT (A2)	A	2	Unambiguous	TSCEAVCQLR	TScEAVcQLR	C3(Carbamidomethyl); C7(Carbamidomethyl)	2	A0A7E6F1Y7	mucin-5AC-like OS=Octopus vulgaris OX=6645 GN=LOC115215420 PE=4 SV=1	Cluster-58773.135554;orf1 len=557 frame:3 start:3 end:1673 gi; A0A7E6F1Y7	190609994 tpe|CAJ43921.1| TPA: SCO-spondin precursor [Tetraodon nigroviridis]; mucin-5AC-like OS=Octopus vulgaris OX=6645 GN=LOC115215420 PE=4 SV=1	0	2	2	0.5745	0	1	1	1	612.278	1223.55	1223.55	-1.06	-0.00065	0/0	0	0	463265	HCD (High Energy Collision Dissociation)	MS2	13.2795	100	28.7593	5271	5271	5266	MCMMCM34021207.raw	F7	574	2.82	1	0.0001881	4.20x10⁻⁵	1.56
High	Sequest HT	Sequest HT (A2)	A	2	Unambiguous	IQNAGTEVVEAK	IQNAGTEVVEAK		10	A0A6P7SHI1	Malate dehydrogenase OS=Octopus vulgaris OX=6645 GN=LOC115212957 PE=3 SV=1	A0A6P7SHI1; A0A0L8H8S0; A0A0L8H9R3; Q86DP6; Cluster-58773.112591;orf1 len=349 frame:2 start:395 end:1441 gi; A0A0L8H893; A0A812C5C1; Cluster-58773.112597;orf1 len=312 frame:2 start:395 end:1330 gi; Cluster-58773.112596;orf1 len=262 frame:2 start:395 end:1180 gi; A0A0L8H8H0	Malate dehydrogenase OS=Octopus vulgaris OX=6645 GN=LOC115212957 PE=3 SV=1; Malate dehydrogenase OS=Octopus bimaculoides OX=37653 GN=OCBIM_22020205mg PE=3 SV=1; Malate dehydrogenase OS=Octopus bimaculoides OX=37653 GN=OCBIM_22020205mg PE=3 SV=1; Malate dehydrogenase (Fragment) OS=Sepia officinalis OX=6610 GN=Mdh PE=2 SV=1; 524878973 ref|XP_005096166.1| PREDICTED: malate dehydrogenase, mitochondri…	0	2	2	0.2938	0	1	1	1	629.835	1258.66	1258.66	-0.58	-0.00037	0/0	0	0	162637	HCD (High Energy Collision Dissociation)	MS2	8.69876	100	27.5731	5045	5045	5035	MCMMCM34021207.raw	F7	1552	1.94	1	0.0001881	4.57x10⁻³	0.76
High	Sequest HT	Sequest HT (A2)	A	2	Unambiguous	YGNVWKPAGTK	YGNVWKPAGTK		2	Cluster-123723.0;orf1 len=1033 frame:2 start:2 end:3100 gi; A0A7E6FK29	762085926 ref|XP_011425282.1| PREDICTED: mucin-17-like [Crassostrea gigas] mucin-19-like OS=Octopus vulgaris OX=6645 GN=LOC115224399 PE=4 SV=1	Cluster-123723.0;orf1 len=1033 frame:2 start:2 end:3100 gi; A0A7E6FK29	762085926 ref|XP_011425282.1| PREDICTED: mucin-17-like [Crassostrea gigas]; mucin-19-like OS=Octopus vulgaris OX=6645 GN=LOC115224399 PE=4 SV=1	0	3	3	0.3571	0	1	1	1	407.552	1220.64	1220.64	-0.44	-0.00018	0/0	0	0	249900	HCD (High Energy Collision Dissociation)	MS2	44.7077	100	27.5639	5043	5043	5035	MCMMCM34021207.raw	F7	1543	2.94	2	0.0001881	1.58x10⁻³	0.941
High	Sequest HT	Sequest HT (A2)	A	2	Unambiguous	QGHLADFKHEESNGNLVR	QGHLADFKHEESNGNLVR		5	A0A6P7SER3; A0A6P7SDC4; Cluster-58773.162319;orf1 len=2921 frame:3 start:24 end:8786 gi; Cluster-58773.162305;orf1 len=76 frame:-1 start:229 end:2 gi	hemocyanin 1-like OS=Octopus vulgaris OX=6645 GN=LOC115212215 PE=4 SV=2 hemocyanin G-type, units Oda to Odg OS=Octopus vulgaris OX=6645 GN=LOC115211670 PE=4 SV=2 16596797 gb|AAK28276.2| hemocyanin G-type [Enteroctopus dofleini] 52550954 gb|AAU84460.1| hemocyanin A-type [Enteroctopus dofleini]	A0A6P7SER3; Cluster-58773.162316;orf1 len=2526 frame:3 start:24 end:7601 gi; A0A6P7SDC4; Cluster-58773.162319;orf1 len=2921 frame:3 start:24 end:8786 gi; Cluster-58773.162305;orf1 len=76 frame:-1 start:229 end:2 gi	hemocyanin 1-like OS=Octopus vulgaris OX=6645 GN=LOC115212215 PE=4 SV=2; 16596797 gb|AAK28276.2| hemocyanin G-type [Enteroctopus dofleini]; hemocyanin G-type, units Oda to Odg OS=Octopus vulgaris OX=6645 GN=LOC115211670 PE=4 SV=2; 16596797 gb|AAK28276.2| hemocyanin G-type [Enteroctopus dofleini]; 52550954 gb|AAU84460.1| hemocyanin A-type [Enteroctopus dofleini]	1	3	3	0.6149	0	1	1	1	684.339	2051	2051.01	-1.97	-0.00135	0/0	0	0	80671.7	HCD (High Energy Collision Dissociation)	MS2	0	100	27.513	5033	5033	5024	MCMMCM34021207.raw	F7	1391	3.35	4	0.0001881	6.10x10⁻³	0.711
High	Sequest HT	Sequest HT (A2)	A	2	Unambiguous	SLTTEEEHELR	SLTTEEEHELR		5	A0A6P7SER3; A0A6P7SDC4; Cluster-58773.162319;orf1 len=2921 frame:3 start:24 end:8786 gi	hemocyanin 1-like OS=Octopus vulgaris OX=6645 GN=LOC115212215 PE=4 SV=2 hemocyanin G-type, units Oda to Odg OS=Octopus vulgaris OX=6645 GN=LOC115211670 PE=4 SV=2 16596797 gb|AAK28276.2| hemocyanin G-type [Enteroctopus dofleini]	A0A6P7SER3; Cluster-58773.162316;orf1 len=2526 frame:3 start:24 end:7601 gi; A0A6P7SDC4; Cluster-58773.162317;orf1 len=187 frame:-3 start:561 end:1 gi; Cluster-58773.162319;orf1 len=2921 frame:3 start:24 end:8786 gi	hemocyanin 1-like OS=Octopus vulgaris OX=6645 GN=LOC115212215 PE=4 SV=2; 16596797 gb|AAK28276.2| hemocyanin G-type [Enteroctopus dofleini]; hemocyanin G-type, units Oda to Odg OS=Octopus vulgaris OX=6645 GN=LOC115211670 PE=4 SV=2; 52550954 gb|AAU84460.1| hemocyanin A-type [Enteroctopus dofleini]; 16596797 gb|AAK28276.2| hemocyanin G-type [Enteroctopus dofleini]	0	2	2	0.5963	0	1	1	1	672.327	1343.65	1343.64	1.59	0.00107	0/0	0	0	262275	HCD (High Energy Collision Dissociation)	MS2	2.06448	100	26.4206	4831	4831	4826	MCMMCM34021207.raw	F7	886	3.22	3	0.0001881	1.48x10⁻⁴	1.345
High	Sequest HT	Sequest HT (A2)	A	2	Unambiguous	HGVDGGSLIQTK	HGVDGGSLIQTK		2	A0A6P7TIG1	histone H1-like OS=Octopus vulgaris OX=6645 GN=LOC115222802 PE=3 SV=1	Cluster-131439.0;orf1 len=194 frame:3 start:3 end:584 gi; A0A6P7TIG1	676486625 ref|XP_009064035.1| hypothetical protein LOTGIDRAFT_207166 [Lottia gigantea]>gi|556096685|gb|ESO85337.1| hypothetical protein LOTGIDRAFT_207166 [Lottia gigantea]; histone H1-like OS=Octopus vulgaris OX=6645 GN=LOC115222802 PE=3 SV=1	0	2	2	0.5747	0	1	1	1	606.323	1211.64	1211.64	1.12	0.00068	0/0	0	0	283678	HCD (High Energy Collision Dissociation)	MS2	35.3059	100	26.4114	4829	4829	4826	MCMMCM34021207.raw	F7	1073	3.48	1	0.0001881	8.66x10⁻⁵	1.437
High	Sequest HT	Sequest HT (A2)	A	2	Unambiguous	DTNPISLTKDHAK	DTNPISLTKDHAK		4	A0A6P7SER3; A0A6P7SDC4; Cluster-58773.162319;orf1 len=2921 frame:3 start:24 end:8786 gi	hemocyanin 1-like OS=Octopus vulgaris OX=6645 GN=LOC115212215 PE=4 SV=2 hemocyanin G-type, units Oda to Odg OS=Octopus vulgaris OX=6645 GN=LOC115211670 PE=4 SV=2 16596797 gb|AAK28276.2| hemocyanin G-type [Enteroctopus dofleini]	A0A6P7SER3; Cluster-58773.162316;orf1 len=2526 frame:3 start:24 end:7601 gi; A0A6P7SDC4; Cluster-58773.162319;orf1 len=2921 frame:3 start:24 end:8786 gi	hemocyanin 1-like OS=Octopus vulgaris OX=6645 GN=LOC115212215 PE=4 SV=2; 16596797 gb|AAK28276.2| hemocyanin G-type [Enteroctopus dofleini]; hemocyanin G-type, units Oda to Odg OS=Octopus vulgaris OX=6645 GN=LOC115211670 PE=4 SV=2; 16596797 gb|AAK28276.2| hemocyanin G-type [Enteroctopus dofleini]	1	3	3	0.5186	0	1	1	1	480.588	1439.75	1439.75	-0.54	-0.00026	0/0	0	0	292800	HCD (High Energy Collision Dissociation)	MS2	43.289	100	26.4068	4828	4828	4826	MCMMCM34021207.raw	F7	1244	3.22	3	0.0001881	5.95x10⁻⁵	1.501
High	Sequest HT	Sequest HT (A2)	A	2	Unambiguous	SLTTEEEHELR	SLTTEEEHELR		5	A0A6P7SER3; A0A6P7SDC4; Cluster-58773.162319;orf1 len=2921 frame:3 start:24 end:8786 gi	hemocyanin 1-like OS=Octopus vulgaris OX=6645 GN=LOC115212215 PE=4 SV=2 hemocyanin G-type, units Oda to Odg OS=Octopus vulgaris OX=6645 GN=LOC115211670 PE=4 SV=2 16596797 gb|AAK28276.2| hemocyanin G-type [Enteroctopus dofleini]	A0A6P7SER3; Cluster-58773.162316;orf1 len=2526 frame:3 start:24 end:7601 gi; A0A6P7SDC4; Cluster-58773.162317;orf1 len=187 frame:-3 start:561 end:1 gi; Cluster-58773.162319;orf1 len=2921 frame:3 start:24 end:8786 gi	hemocyanin 1-like OS=Octopus vulgaris OX=6645 GN=LOC115212215 PE=4 SV=2; 16596797 gb|AAK28276.2| hemocyanin G-type [Enteroctopus dofleini]; hemocyanin G-type, units Oda to Odg OS=Octopus vulgaris OX=6645 GN=LOC115211670 PE=4 SV=2; 52550954 gb|AAU84460.1| hemocyanin A-type [Enteroctopus dofleini]; 16596797 gb|AAK28276.2| hemocyanin G-type [Enteroctopus dofleini]	0	3	3	0.5423	0	1	1	1	448.553	1343.65	1343.64	1.17	0.00053	0/0	0	0	1.11224e+06	HCD (High Energy Collision Dissociation)	MS2	2.31133	38.018	26.4034	4827	4827	4826	MCMMCM34021207.raw	F7	860	3.43	3	0.0001881	5.77x10⁻⁴	1.113
High	Sequest HT	Sequest HT (A2)	A	2	Unambiguous	IKNFCAGGNSLR	IKNFcAGGNSLR	C5(Carbamidomethyl)	1	Cluster-58773.172049;orf1 len=413 frame:1 start:1 end:1239 gi	657587462 ref|XP_008298024.1| PREDICTED: heme-binding protein 2-like [Stegastes partitus]	Cluster-58773.172049;orf1 len=413 frame:1 start:1 end:1239 gi	657587462 ref|XP_008298024.1| PREDICTED: heme-binding protein 2-like [Stegastes partitus]	1	3	3	0.464	0	1	1	1	446.231	1336.68	1336.68	-0.17	-8e-05	0/0	0	0	510572	HCD (High Energy Collision Dissociation)	MS2	6.12353	93.638	26.3433	4816	4816	4815	MCMMCM34021207.raw	F7	1454	3.75	1	0.0001881	2.69x10⁻⁵	1.636
High	Sequest HT	Sequest HT (A2)	A	2	Unambiguous	TLYTTEDAEK	TLYTTEDAEK		5	A0A6P7SYP7	Protein disulfide-isomerase OS=Octopus vulgaris OX=6645 GN=LOC115217959 PE=3 SV=1	A0A6P7SYP7; Cluster-58773.194454;orf1 len=470 frame:2 start:1082 end:2491 gi; Cluster-58773.194456;orf1 len=258 frame:2 start:1082 end:1855 gi; Cluster-58773.194458;orf1 len=154 frame:-2 start:464 end:3 gi; Cluster-58773.194453;orf1 len=506 frame:2 start:1082 end:2599 gi	Protein disulfide-isomerase OS=Octopus vulgaris OX=6645 GN=LOC115217959 PE=3 SV=1; 762140057 ref|XP_011453191.1| PREDICTED: protein disulfide-isomerase A3-like [Crassostrea gigas]>gi|405967698|gb|EKC32832.1| Protein disulfide-isomerase A3 [Crassostrea gigas]; 762140057 ref|XP_011453191.1| PREDICTED: protein disulfide-isomerase A3-like [Crassostrea gigas]>gi|405967698|gb|EKC32832.1| Protein disulf…	0	2	2	0.5179	0	1	1	1	585.78	1170.55	1170.55	-0.55	-0.00032	0/0	0	0	166773	HCD (High Energy Collision Dissociation)	MS2	14.8828	100	26.291	4807	4807	4804	MCMMCM34021207.raw	F7	687	1.95	1	0.0001881	1.72x10⁻³	0.927
High	Sequest HT	Sequest HT (A2)	A	2	Unambiguous	FGTVAGPCNK	FGTVAGPcNK	C8(Carbamidomethyl)	2	Cluster-58773.155036;orf1 len=454 frame:1 start:1 end:1362 gi	676495464 ref|XP_009066900.1| hypothetical protein LOTGIDRAFT_134745 [Lottia gigantea]>gi|556093743|gb|ESO82396.1| hypothetical protein LOTGIDRAFT_134745 [Lottia gigantea]	Cluster-58773.155036;orf1 len=454 frame:1 start:1 end:1362 gi; A0A6P7U0U0	676495464 ref|XP_009066900.1| hypothetical protein LOTGIDRAFT_134745 [Lottia gigantea]>gi|556093743|gb|ESO82396.1| hypothetical protein LOTGIDRAFT_134745 [Lottia gigantea]; collagen alpha-1(XII) chain OS=Octopus vulgaris OX=6645 GN=LOC115229655 PE=4 SV=2	0	2	2	0.5519	0	1	1	1	525.755	1050.5	1050.5	-0.14	-8e-05	0/0	0	0	544051	HCD (High Energy Collision Dissociation)	MS2	29.3758	100	26.2819	4805	4805	4804	MCMMCM34021207.raw	F7	1097	3.08	1	0.0001881	2.78x10⁻⁴	1.238
High	Sequest HT	Sequest HT (A2)	A	2	Unambiguous	HEQNIDCGGGYIK	HEQNIDcGGGYIK	C7(Carbamidomethyl)	3	A0A7E6F2W5	Calreticulin OS=Octopus vulgaris OX=6645 GN=LOC115215618 PE=3 SV=1	Cluster-58773.173059;orf2 len=242 frame:2 start:863 end:1588 gi; A0A7E6F2W5; A0A0L8I919	406055040 gb|AFS33112.1| calreticulin [Hyriopsis cumingii]; Calreticulin OS=Octopus vulgaris OX=6645 GN=LOC115215618 PE=3 SV=1; Calreticulin OS=Octopus bimaculoides OX=37653 GN=OCBIM_22027793mg PE=3 SV=1	0	2	2	0.6729	0	1	1	1	745.839	1490.67	1490.67	1.07	0.00079	0/0	0	0	108763	HCD (High Energy Collision Dissociation)	MS2	0	100	26.258	4802	4802	4793	MCMMCM34021207.raw	F7	515	2.69	1	0.0001881	3.11x10⁻⁵	1.611
High	Sequest HT	Sequest HT (A2)	A	2	Unambiguous	GHRYNSANCAIETLR	GHRYNSANcAIETLR	C9(Carbamidomethyl)	8	A0A0L8GNM6; A0A6P7SER3; Q9BJ58; O61363; A0A6P7SDC4; Q5XLV2; Cluster-58773.162319;orf1 len=2921 frame:3 start:24 end:8786 gi	Uncharacterized protein OS=Octopus bimaculoides OX=37653 GN=OCBIM_22031096mg PE=4 SV=1 hemocyanin 1-like OS=Octopus vulgaris OX=6645 GN=LOC115212215 PE=4 SV=2 Hemocyanin G-type (Fragment) OS=Enteroctopus dofleini OX=267067 PE=4 SV=2 Hemocyanin G-type, units Oda to Odg OS=Enteroctopus dofleini OX=267067 GN=ODHCY PE=1 SV=1 hemocyanin G-type, units Oda to Odg OS=Octopus vulgaris OX=6645 GN=LOC115211…	A0A0L8GNM6; A0A6P7SER3; Cluster-58773.162316;orf1 len=2526 frame:3 start:24 end:7601 gi; Q9BJ58; O61363; A0A6P7SDC4; Q5XLV2; Cluster-58773.162319;orf1 len=2921 frame:3 start:24 end:8786 gi	Uncharacterized protein OS=Octopus bimaculoides OX=37653 GN=OCBIM_22031096mg PE=4 SV=1; hemocyanin 1-like OS=Octopus vulgaris OX=6645 GN=LOC115212215 PE=4 SV=2; 16596797 gb|AAK28276.2| hemocyanin G-type [Enteroctopus dofleini]; Hemocyanin G-type (Fragment) OS=Enteroctopus dofleini OX=267067 PE=4 SV=2; Hemocyanin G-type, units Oda to Odg OS=Enteroctopus dofleini OX=267067 GN=ODHCY PE=1 SV=1; hemoc…	1	3	3	0.5892	0	1	1	1	587.952	1761.84	1761.84	-1.38	-0.00081	0/0	0	0	216547	HCD (High Energy Collision Dissociation)	MS2	70.2972	100	26.4252	4832	4832	4826	MCMMCM34021207.raw	F7	1104	4.09	7	0.0001881	5.38x10⁻⁵	1.518
High	Sequest HT	Sequest HT (A2)	A	2	Unambiguous	ENNPFHHAHIDVVNKDTTRAPR	ENNPFHHAHIDVVNKDTTRAPR		1	A0A6P7SER3	hemocyanin 1-like OS=Octopus vulgaris OX=6645 GN=LOC115212215 PE=4 SV=2	A0A6P7SER3	hemocyanin 1-like OS=Octopus vulgaris OX=6645 GN=LOC115212215 PE=4 SV=2	2	5	5	0.5273	0	1	1	1	514.462	2568.28	2568.28	-0.54	-0.00028	0/0	0	0	98526.8	HCD (High Energy Collision Dissociation)	MS2	29.2608	100	26.2489	4800	4800	4793	MCMMCM34021207.raw	F7	1366	4.21	1	0.0001881	3.20x10⁻⁴	1.214
High	Sequest HT	Sequest HT (A2)	A	2	Unambiguous	HEQNIDCGGGYIK	HEQNIDcGGGYIK	C7(Carbamidomethyl)	3	A0A7E6F2W5	Calreticulin OS=Octopus vulgaris OX=6645 GN=LOC115215618 PE=3 SV=1	Cluster-58773.173059;orf2 len=242 frame:2 start:863 end:1588 gi; A0A7E6F2W5; A0A0L8I919	406055040 gb|AFS33112.1| calreticulin [Hyriopsis cumingii]; Calreticulin OS=Octopus vulgaris OX=6645 GN=LOC115215618 PE=3 SV=1; Calreticulin OS=Octopus bimaculoides OX=37653 GN=OCBIM_22027793mg PE=3 SV=1	0	3	3	0.6042	0	1	1	1	497.561	1490.67	1490.67	0.18	9e-05	0/0	0	0	449928	HCD (High Energy Collision Dissociation)	MS2	11.9186	92.128	26.2306	4796	4796	4793	MCMMCM34021207.raw	F7	505	3.31	1	0.0001881	1.39x10⁻⁴	1.356
High	Sequest HT	Sequest HT (A2)	A	2	Unambiguous	KPWAIESCK	KPWAIEScK	C8(Carbamidomethyl)	6	A0A7E6FK29	mucin-19-like OS=Octopus vulgaris OX=6645 GN=LOC115224399 PE=4 SV=1	Cluster-123723.2;orf1 len=507 frame:3 start:2952 end:4472 gi; Cluster-123723.1;orf1 len=564 frame:3 start:2952 end:4643 gi; A0A0L8HYY1; Cluster-123723.3;orf2 len=488 frame:3 start:2952 end:4415 gi; A0A7E6FK29; Cluster-123723.0;orf2 len=555 frame:3 start:2952 end:4616 gi	762085926 ref|XP_011425282.1| PREDICTED: mucin-17-like [Crassostrea gigas]; 762085926 ref|XP_011425282.1| PREDICTED: mucin-17-like [Crassostrea gigas]; Uncharacterized protein OS=Octopus bimaculoides OX=37653 GN=OCBIM_22001740mg PE=4 SV=1; 762085926 ref|XP_011425282.1| PREDICTED: mucin-17-like [Crassostrea gigas]; mucin-19-like OS=Octopus vulgaris OX=6645 GN=LOC115224399 PE=4 SV=1; 762085926 ref|…	0	2	2	0.6161	0	1	1	1	559.787	1118.57	1118.57	-0.03	-2e-05	0/0	0	0	518484	HCD (High Energy Collision Dissociation)	MS2	6.40348	100	26.226	4795	4795	4793	MCMMCM34021207.raw	F7	1430	3.36	1	0.0001881	2.85x10⁻⁵	1.626
High	Sequest HT	Sequest HT (A2)	A	2	Unambiguous	QSPVNIDSGSTK	QSPVNIDSGSTK		2	A0A6P7SJN1; Cluster-58773.198809;orf1 len=296 frame:2 start:149 end:1036 gi	Carbonic anhydrase OS=Octopus vulgaris OX=6645 GN=LOC115213348 PE=3 SV=1 871209239 ref|XP_012941697.1| PREDICTED: carbonic anhydrase 1-like [Aplysia californica]	A0A6P7SJN1; Cluster-58773.198809;orf1 len=296 frame:2 start:149 end:1036 gi	Carbonic anhydrase OS=Octopus vulgaris OX=6645 GN=LOC115213348 PE=3 SV=1; 871209239 ref|XP_012941697.1| PREDICTED: carbonic anhydrase 1-like [Aplysia californica]	0	2	2	0.6019	0	1	1	1	616.81	1232.61	1232.61	0.91	0.00056	0/0	0	0	901083	HCD (High Energy Collision Dissociation)	MS2	1.9686	68.451	26.222	4794	4794	4793	MCMMCM34021207.raw	F7	1380	3.19	2	0.0001881	4.52x10⁻⁵	1.548
High	Sequest HT	Sequest HT (A2)	A	2	Unambiguous	IGHELSGPSNLK	IGHELSGPSNLK		5	A0A6P7TDP8	sushi, von Willebrand factor type A, EGF and pentraxin domain-containing protein 1 isoform X1 OS=Octopus vulgaris OX=6645 GN=LOC115222969 PE=4 SV=1	Cluster-58773.189643;orf1 len=126 frame:-2 start:379 end:2 gi; A0A6P7TDP8; Cluster-58773.189638;orf1 len=768 frame:2 start:2 end:2305 gi; A0A7E6FJ00; Cluster-58773.189635;orf1 len=891 frame:2 start:2 end:2674 gi	554820385 ref|XP_005920931.1| PREDICTED: E-selectin-like isoform X2 [Haplochromis burtoni]; sushi, von Willebrand factor type A, EGF and pentraxin domain-containing protein 1 isoform X1 OS=Octopus vulgaris OX=6645 GN=LOC115222969 PE=4 SV=1; 443711419 gb|ELU05207.1| hypothetical protein CAPTEDRAFT_227166 [Capitella teleta]; sushi, von Willebrand factor type A, EGF and pentraxin domain-containing p…	0	2	2	0.6288	0	1	1	1	626.339	1251.67	1251.67	1.49	0.00093	0/0	0	0	108815	HCD (High Energy Collision Dissociation)	MS2	63.0988	100	26.1395	4780	4780	4771	MCMMCM34021207.raw	F7	1055	2.29	1	0.0001881	1.26x10⁻²	0.585
High	Sequest HT	Sequest HT (A2)	A	2	Unambiguous	IGHELSGPSNLK	IGHELSGPSNLK		5	A0A6P7TDP8	sushi, von Willebrand factor type A, EGF and pentraxin domain-containing protein 1 isoform X1 OS=Octopus vulgaris OX=6645 GN=LOC115222969 PE=4 SV=1	Cluster-58773.189643;orf1 len=126 frame:-2 start:379 end:2 gi; A0A6P7TDP8; Cluster-58773.189638;orf1 len=768 frame:2 start:2 end:2305 gi; A0A7E6FJ00; Cluster-58773.189635;orf1 len=891 frame:2 start:2 end:2674 gi	554820385 ref|XP_005920931.1| PREDICTED: E-selectin-like isoform X2 [Haplochromis burtoni]; sushi, von Willebrand factor type A, EGF and pentraxin domain-containing protein 1 isoform X1 OS=Octopus vulgaris OX=6645 GN=LOC115222969 PE=4 SV=1; 443711419 gb|ELU05207.1| hypothetical protein CAPTEDRAFT_227166 [Capitella teleta]; sushi, von Willebrand factor type A, EGF and pentraxin domain-containing p…	0	3	3	0.4235	0	1	1	1	417.895	1251.67	1251.67	2.12	0.00088	0/0	0	0	449327	HCD (High Energy Collision Dissociation)	MS2	26.6403	96.418	26.1122	4774	4774	4771	MCMMCM34021207.raw	F7	987	3.4	1	0.0001881	6.70x10⁻⁴	1.088
High	Sequest HT	Sequest HT (A2)	A	2	Unambiguous	SGVTLTTAR	SGVTLTTAR		3	Cluster-123723.0;orf1 len=1033 frame:2 start:2 end:3100 gi; A0A7E6FK29	762085926 ref|XP_011425282.1| PREDICTED: mucin-17-like [Crassostrea gigas] mucin-19-like OS=Octopus vulgaris OX=6645 GN=LOC115224399 PE=4 SV=1	Cluster-41557.0;orf1 len=400 frame:2 start:2 end:1201 gi; Cluster-123723.0;orf1 len=1033 frame:2 start:2 end:3100 gi; A0A7E6FK29	762085926 ref|XP_011425282.1| PREDICTED: mucin-17-like [Crassostrea gigas]; 762085926 ref|XP_011425282.1| PREDICTED: mucin-17-like [Crassostrea gigas]; mucin-19-like OS=Octopus vulgaris OX=6645 GN=LOC115224399 PE=4 SV=1	0	2	2	0.375	0	1	1	1	453.257	905.507	905.505	2.54	0.00115	0/0	0	0	1.32642e+06	HCD (High Energy Collision Dissociation)	MS2	11.6399	46.507	26.1039	4772	4772	4771	MCMMCM34021207.raw	F7	1258	2.72	2	0.0001881	1.21x10⁻³	0.987
High	Sequest HT	Sequest HT (A2)	A	2	Unambiguous	KIEGYGSASGALK	KIEGYGSASGALK		3	Cluster-58773.150806;orf1 len=206 frame:3 start:1683 end:2300 gi	700589070 gb|AIU94796.1| hypothetical protein [Phragmatopoma lapidosa]	Cluster-58773.150799;orf1 len=182 frame:-2 start:631 end:86 gi; Cluster-58773.150801;orf1 len=105 frame:1 start:232 end:546 gi; Cluster-58773.150806;orf1 len=206 frame:3 start:1683 end:2300 gi	700589070 gb|AIU94796.1| hypothetical protein [Phragmatopoma lapidosa]; 675366295 gb|KFM59197.1| Peptidyl-prolyl cis-trans isomerase, partial [Stegodyphus mimosarum]; 700589070 gb|AIU94796.1| hypothetical protein [Phragmatopoma lapidosa]	1	2	2	0.6448	0	1	1	1	640.846	1280.69	1280.68	0.63	0.0004	0/0	0	0	130420	HCD (High Energy Collision Dissociation)	MS2	5.83613	100	26.0264	4759	4759	4749	MCMMCM34021207.raw	F7	1119	3.97	1	0.0001881	5.01x10⁻⁸	2.707
High	Sequest HT	Sequest HT (A2)	A	2	Unambiguous	HHEGFTNWPSK	HHEGFTNWPSK		10	A0A6P7TGL8	Alpha-L-fucosidase OS=Octopus vulgaris OX=6645 GN=LOC115223076 PE=3 SV=1	A0A812EYC7; A0A812EYA2; A0A6P7TIJ9; A0A6P7TGL8; A0A6P7TEG5; A0A6P7THI0; A0A0L8HTH8; A0A6P7U0Q7; Cluster-58773.177427;orf1 len=186 frame:-2 start:558 end:1 gi; Cluster-58773.133980;orf1 len=229 frame:-2 start:688 end:2 gi	Isocitrate dehydrogenase [NAD] subunit, mitochondrial OS=Sepia pharaonis OX=158019 GN=SPHA_81653 PE=3 SV=1; Isocitrate dehydrogenase [NAD] subunit, mitochondrial OS=Sepia pharaonis OX=158019 GN=SPHA_81653 PE=3 SV=1; Alpha-L-fucosidase OS=Octopus vulgaris OX=6645 GN=LOC115223232 PE=3 SV=1; Alpha-L-fucosidase OS=Octopus vulgaris OX=6645 GN=LOC115223076 PE=3 SV=1; Alpha-L-fucosidase OS=Octopus vulga…	0	3	3	0.554	0	1	1	1	447.211	1339.62	1339.62	1.35	0.0006	0/0	0	0	234874	HCD (High Energy Collision Dissociation)	MS2	13.4721	100	26.0036	4754	4754	4749	MCMMCM34021207.raw	F7	823	2.87	1	0.0001881	1.65x10⁻³	0.934
High	Sequest HT	Sequest HT (A2)	A	2	Unambiguous	GSDQGKFEISAGK	GSDQGKFEISAGK		4	A0A7E6F2W5	Calreticulin OS=Octopus vulgaris OX=6645 GN=LOC115215618 PE=3 SV=1	Cluster-58773.123106;orf1 len=100 frame:-3 start:302 end:3 gi; Cluster-58773.173059;orf2 len=242 frame:2 start:863 end:1588 gi; A0A7E6F2W5; A0A0L8I919	47550939 ref|NP_999643.1| calreticulin precursor [Strongylocentrotus purpuratus]>gi|5911266|gb|AAD55725.1|AF177915_1 calreticulin precursor [Strongylocentrotus purpuratus]; 406055040 gb|AFS33112.1| calreticulin [Hyriopsis cumingii]; Calreticulin OS=Octopus vulgaris OX=6645 GN=LOC115215618 PE=3 SV=1; Calreticulin OS=Octopus bimaculoides OX=37653 GN=OCBIM_22027793mg PE=3 SV=1	1	3	3	0.4934	0	1	1	1	441.889	1323.65	1323.65	-1.08	-0.00048	0/0	0	0	191741	HCD (High Energy Collision Dissociation)	MS2	16.5863	100	26.2397	4798	4798	4793	MCMMCM34021207.raw	F7	1443	2.29	1	0.0001881	2.60x10⁻²	0.459
High	Sequest HT	Sequest HT (A2)	A	2	Unambiguous	TATPEQAQSVHASLR	TATPEQAQSVHASLR		5	A0A0S1U346	Triosephosphate isomerase OS=Amphioctopus fangsiao OX=515817 PE=2 SV=1	Cluster-58773.133363;orf1 len=118 frame:-3 start:355 end:2 gi; Cluster-58773.133364;orf1 len=208 frame:-3 start:625 end:2 gi; Cluster-58773.133367;orf1 len=235 frame:1 start:601 end:1305 gi; A0A0S1U346; Cluster-58773.133362;orf1 len=150 frame:2 start:305 end:754 gi	339013169 gb|AEJ33823.1| triosephosphate isomerase [Octopus bimaculoides]; 339013169 gb|AEJ33823.1| triosephosphate isomerase [Octopus bimaculoides]; 762143735 ref|XP_011455124.1| PREDICTED: triosephosphate isomerase-like [Crassostrea gigas]; Triosephosphate isomerase OS=Amphioctopus fangsiao OX=515817 PE=2 SV=1; 339013169 gb|AEJ33823.1| triosephosphate isomerase [Octopus bimaculoides]	0	3	3	0.6265	0	1	1	1	532.61	1595.82	1595.81	1.96	0.00104	0/0	0	0	545664	HCD (High Energy Collision Dissociation)	MS2	63.6197	69.43	25.9315	4740	4740	4738	MCMMCM34021207.raw	F7	1446	4.15	1	0.0001881	1.12x10⁻⁶	2.178
High	Sequest HT	Sequest HT (A2)	A	2	Unambiguous	HGVDGGSLIQTK	HGVDGGSLIQTK		2	A0A6P7TIG1	histone H1-like OS=Octopus vulgaris OX=6645 GN=LOC115222802 PE=3 SV=1	Cluster-131439.0;orf1 len=194 frame:3 start:3 end:584 gi; A0A6P7TIG1	676486625 ref|XP_009064035.1| hypothetical protein LOTGIDRAFT_207166 [Lottia gigantea]>gi|556096685|gb|ESO85337.1| hypothetical protein LOTGIDRAFT_207166 [Lottia gigantea]; histone H1-like OS=Octopus vulgaris OX=6645 GN=LOC115222802 PE=3 SV=1	0	3	3	0.5272	0	1	1	1	404.551	1211.64	1211.64	0.07	3e-05	0/0	0	0	795551	HCD (High Energy Collision Dissociation)	MS2	2.03732	52.896	26.4697	4840	4840	4837	MCMMCM34021207.raw	F7	1144	3.13	1	0.0001881	3.33x10⁻³	0.814
High	Sequest HT	Sequest HT (A2)	A	2	Unambiguous	VAVCVPTDDKR	VAVcVPTDDKR	C4(Carbamidomethyl)	3	A0A6P7SER3; Cluster-58773.162319;orf1 len=2921 frame:3 start:24 end:8786 gi	hemocyanin 1-like OS=Octopus vulgaris OX=6645 GN=LOC115212215 PE=4 SV=2 16596797 gb|AAK28276.2| hemocyanin G-type [Enteroctopus dofleini]	A0A6P7SER3; Cluster-58773.162316;orf1 len=2526 frame:3 start:24 end:7601 gi; Cluster-58773.162319;orf1 len=2921 frame:3 start:24 end:8786 gi	hemocyanin 1-like OS=Octopus vulgaris OX=6645 GN=LOC115212215 PE=4 SV=2; 16596797 gb|AAK28276.2| hemocyanin G-type [Enteroctopus dofleini]; 16596797 gb|AAK28276.2| hemocyanin G-type [Enteroctopus dofleini]	1	3	3	0.5226	0	1	1	1	420.552	1259.64	1259.64	-0.22	-9e-05	0/0	0	0	2326676	HCD (High Energy Collision Dissociation)	MS2	2.45073	19.981	26.699	4882	4882	4881	MCMMCM34021207.raw	F7	1394	3.1	2	0.0001881	1.71x10⁻³	0.929
High	Sequest HT	Sequest HT (A2)	A	2	Unambiguous	TISDQLAK	TISDQLAK		4	A0A0L8I519	Sulfotransfer_1 domain-containing protein OS=Octopus bimaculoides OX=37653 GN=OCBIM_22034539mg PE=4 SV=1	A0A0L8I519; Cluster-58773.54685;orf1 len=234 frame:2 start:2 end:703 gi; Cluster-58773.233746;orf1 len=109 frame:-1 start:443 end:117 gi; A0A6P7S8C8	Sulfotransfer_1 domain-containing protein OS=Octopus bimaculoides OX=37653 GN=OCBIM_22034539mg PE=4 SV=1; 871245287 ref|XP_005102442.2| PREDICTED: sulfotransferase 6B1-like, partial [Aplysia californica]; 58332840 ref|NP_001011496.1| uncharacterized protein LOC496998 [Xenopus (Silurana) tropicalis]>gi|57033213|gb|AAH88888.1| hypothetical LOC496998 [Xenopus (Silurana) tropicalis]; sulfotransferase…	0	2	2	0	0	1	1	1	438.245	875.483	875.483	-0.55	-0.00024	0/0	0	0	241793	HCD (High Energy Collision Dissociation)	MS2	21.2644	100	27.4809	5026	5026	5024	MCMMCM34021207.raw	F7	1482	1.5	1	0.0001881	2.91x10⁻²	0.44
High	Sequest HT	Sequest HT (A2)	A	2	Unambiguous	DQGSDPDIVK	DQGSDPDIVK		3	A0A6P7U1Y0	deoxynucleoside triphosphate triphosphohydrolase SAMHD1-like OS=Octopus vulgaris OX=6645 GN=LOC115232247 PE=4 SV=1	A0A6P7U4P1; A0A6P7U1Y0; A0A6P7TXT0	deoxynucleoside triphosphate triphosphohydrolase SAMHD1-like isoform X2 OS=Octopus vulgaris OX=6645 GN=LOC115231345 PE=4 SV=1; deoxynucleoside triphosphate triphosphohydrolase SAMHD1-like OS=Octopus vulgaris OX=6645 GN=LOC115232247 PE=4 SV=1; deoxynucleoside triphosphate triphosphohydrolase SAMHD1-like isoform X1 OS=Octopus vulgaris OX=6645 GN=LOC115231345 PE=4 SV=1	0	2	2	0.5236	0	1	1	1	537.259	1073.51	1073.51	-0.6	-0.00032	0/0	0	0	332775	HCD (High Energy Collision Dissociation)	MS2	29.4305	100	27.4257	5016	5016	5013	MCMMCM34021207.raw	F7	655	1.91	1	0.0001881	3.81x10⁻³	0.791
High	Sequest HT	Sequest HT (A2)	A	2	Unambiguous	AGFGGDPEPR	AGFGGDPEPR		4	A0A6P7TL86	actin, cytoplasmic-like OS=Octopus vulgaris OX=6645 GN=LOC115225825 PE=3 SV=2	A0A6P7TL86; Cluster-58773.53304;orf1 len=422 frame:3 start:273 end:1538 gi; Cluster-58773.53301;orf1 len=412 frame:3 start:273 end:1508 gi; A0A6P7TRR8	actin, cytoplasmic-like OS=Octopus vulgaris OX=6645 GN=LOC115225825 PE=3 SV=2; 156395354 ref|XP_001637076.1| predicted protein [Nematostella vectensis]>gi|156224185|gb|EDO45013.1| predicted protein [Nematostella vectensis]; 156395354 ref|XP_001637076.1| predicted protein [Nematostella vectensis]>gi|156224185|gb|EDO45013.1| predicted protein [Nematostella vectensis]; actin-like OS=Octopus vulgaris…	0	2	2	0.5389	0	1	1	1	501.735	1002.46	1002.46	-1.62	-0.00081	0/0	0	0	99742.3	HCD (High Energy Collision Dissociation)	MS2	55.5076	100	27.3979	5012	5012	5002	MCMMCM34021207.raw	F7	537	1.93	1	0.0001881	2.72x10⁻³	0.849
High	Sequest HT	Sequest HT (A2)	A	2	Unambiguous	YECDTTCANSPEYK	YEcDTTcANSPEYK	C3(Carbamidomethyl); C7(Carbamidomethyl)	5	A0A7E6EJW8	uncharacterized protein LOC115230628 isoform X2 OS=Octopus vulgaris OX=6645 GN=LOC115230628 PE=4 SV=1	A0A7E6EJW8; A0A6P7TW45; A0A7E6EK07; A0A7E6EJ76; A0A7E6EKZ0	uncharacterized protein LOC115230628 isoform X2 OS=Octopus vulgaris OX=6645 GN=LOC115230628 PE=4 SV=1; uncharacterized protein LOC115230628 isoform X1 OS=Octopus vulgaris OX=6645 GN=LOC115230628 PE=4 SV=2; uncharacterized protein LOC115230628 isoform X3 OS=Octopus vulgaris OX=6645 GN=LOC115230628 PE=4 SV=1; uncharacterized protein LOC115230628 isoform X5 OS=Octopus vulgaris OX=6645 GN=LOC11523062…	0	2	2	0.7312	0	1	1	1	869.343	1737.68	1737.67	3.39	0.00294	0/0	0	0	151164	HCD (High Energy Collision Dissociation)	MS2	3.54205	100	27.3886	5010	5010	5002	MCMMCM34021207.raw	F7	45	2.53	1	0.0001881	2.71x10⁻⁵	1.635
High	Sequest HT	Sequest HT (A2)	A	2	Unambiguous	LENCNSPLQCK	LENcNSPLQcK	C4(Carbamidomethyl); C10(Carbamidomethyl)	2	Cluster-123723.0;orf1 len=1033 frame:2 start:2 end:3100 gi	762085926 ref|XP_011425282.1| PREDICTED: mucin-17-like [Crassostrea gigas]	Cluster-41557.0;orf1 len=400 frame:2 start:2 end:1201 gi; Cluster-123723.0;orf1 len=1033 frame:2 start:2 end:3100 gi	762085926 ref|XP_011425282.1| PREDICTED: mucin-17-like [Crassostrea gigas]; 762085926 ref|XP_011425282.1| PREDICTED: mucin-17-like [Crassostrea gigas]	0	2	2	0.5292	0	1	1	1	681.811	1362.62	1362.61	0.91	0.00062	0/0	0	0	251801	HCD (High Energy Collision Dissociation)	MS2	19.6465	100	27.37	5006	5006	5002	MCMMCM34021207.raw	F7	537	2.74	1	0.0001881	3.71x10⁻⁴	1.189
High	Sequest HT	Sequest HT (A2)	A	2	Unambiguous	HETSSIHEFSAGVANR	HETSSIHEFSAGVANR		11	A0A6P7TDN5	Glutamine synthetase OS=Octopus vulgaris OX=6645 GN=LOC115222946 PE=3 SV=2	Cluster-58773.160496;orf1 len=283 frame:1 start:22 end:870 gi; Cluster-58773.159477;orf1 len=371 frame:-3 start:1147 end:35 gi; Cluster-58773.160655;orf1 len=106 frame:-1 start:352 end:35 gi; Cluster-58773.158436;orf1 len=107 frame:2 start:2 end:322 gi; Cluster-58773.159476;orf1 len=378 frame:-2 start:1168 end:35 gi; A0A6P7TDN5; A0A6P7TG41; A0A0L8GPC2; Cluster-58773.160657;orf1 len=241 frame:1 st…	762161922 ref|XP_011419208.1| PREDICTED: glutamine synthetase-like [Crassostrea gigas]>gi|405961385|gb|EKC27196.1| Glutamine synthetase [Crassostrea gigas]; 762161922 ref|XP_011419208.1| PREDICTED: glutamine synthetase-like [Crassostrea gigas]>gi|405961385|gb|EKC27196.1| Glutamine synthetase [Crassostrea gigas]; 762161922 ref|XP_011419208.1| PREDICTED: glutamine synthetase-like [Crassostrea gigas…	0	4	4	0.5638	0	1	1	1	436.212	1741.83	1741.83	0.54	0.00023	0/0	0	0	110647	HCD (High Energy Collision Dissociation)	MS2	31.384	100	27.3258	4998	4998	4991	MCMMCM34021207.raw	F7	1029	2.98	1	0.0001881	6.61x10⁻⁴	1.09
High	Sequest HT	Sequest HT (A2)	A	2	Unambiguous	GIIDQTNAR	GIIDQTNAR		4	A0A7E6F5C4	plectin OS=Octopus vulgaris OX=6645 GN=LOC115216635 PE=4 SV=1	Cluster-58773.112136;orf1 len=816 frame:1 start:280 end:2727 gi; A0A7E6F5C4; Cluster-58773.112135;orf1 len=1050 frame:3 start:3 end:3152 gi; A0A0L8HVZ0	871269039 ref|XP_012944656.1| PREDICTED: uncharacterized protein LOC101854908 [Aplysia californica]; plectin OS=Octopus vulgaris OX=6645 GN=LOC115216635 PE=4 SV=1; 871269039 ref|XP_012944656.1| PREDICTED: uncharacterized protein LOC101854908 [Aplysia californica]; SH3 domain-containing protein (Fragment) OS=Octopus bimaculoides OX=37653 GN=OCBIM_22004595mg PE=4 SV=1	0	2	2	0.4163	0	1	1	1	494.264	987.52	987.522	-1.91	-0.00095	0/0	0	0	204861	HCD (High Energy Collision Dissociation)	MS2	6.81	100	27.2522	4984	4984	4980	MCMMCM34021207.raw	F7	1676	2.21	1	0.0001881	7.99x10⁻³	0.664
High	Sequest HT	Sequest HT (A2)	A	2	Unambiguous	HETSSIHEFSAGVANR	HETSSIHEFSAGVANR		11	A0A6P7TDN5	Glutamine synthetase OS=Octopus vulgaris OX=6645 GN=LOC115222946 PE=3 SV=2	Cluster-58773.160496;orf1 len=283 frame:1 start:22 end:870 gi; Cluster-58773.159477;orf1 len=371 frame:-3 start:1147 end:35 gi; Cluster-58773.160655;orf1 len=106 frame:-1 start:352 end:35 gi; Cluster-58773.158436;orf1 len=107 frame:2 start:2 end:322 gi; Cluster-58773.159476;orf1 len=378 frame:-2 start:1168 end:35 gi; A0A6P7TDN5; A0A6P7TG41; A0A0L8GPC2; Cluster-58773.160657;orf1 len=241 frame:1 st…	762161922 ref|XP_011419208.1| PREDICTED: glutamine synthetase-like [Crassostrea gigas]>gi|405961385|gb|EKC27196.1| Glutamine synthetase [Crassostrea gigas]; 762161922 ref|XP_011419208.1| PREDICTED: glutamine synthetase-like [Crassostrea gigas]>gi|405961385|gb|EKC27196.1| Glutamine synthetase [Crassostrea gigas]; 762161922 ref|XP_011419208.1| PREDICTED: glutamine synthetase-like [Crassostrea gigas…	0	3	3	0.67	0	1	1	1	581.28	1741.82	1741.83	-0.67	-0.00039	0/0	0	0	493326	HCD (High Energy Collision Dissociation)	MS2	22.8182	83.863	27.2387	4981	4981	4980	MCMMCM34021207.raw	F7	994	4.97	1	0.0001881	6.35x10⁻⁷	2.274
High	Sequest HT	Sequest HT (A2)	A	2	Unambiguous	VFSGTVATGQK	VFSGTVATGQK		9	A0A6P7SFU0	elongation factor 2 OS=Octopus vulgaris OX=6645 GN=LOC115212776 PE=3 SV=1	A0A6P7SFU0; Cluster-58773.153140;orf1 len=475 frame:1 start:898 end:2322 gi; Cluster-58773.153139;orf1 len=853 frame:1 start:406 end:2964 gi; Cluster-58773.153138;orf1 len=857 frame:1 start:13 end:2583 gi; Cluster-58773.153143;orf1 len=567 frame:-1 start:1703 end:3 gi; A0A0L8FWA8; Cluster-58773.153134;orf1 len=763 frame:1 start:13 end:2301 gi; Cluster-58773.153142;orf1 len=516 frame:1 start:13 en…	elongation factor 2 OS=Octopus vulgaris OX=6645 GN=LOC115212776 PE=3 SV=1; 241781537 ref|XP_002400289.1| elongation factor, putative [Ixodes scapularis]>gi|215510720|gb|EEC20173.1| elongation factor, putative [Ixodes scapularis]; 524906491 ref|XP_005108543.1| PREDICTED: elongation factor 2-like [Aplysia californica]; 524906491 ref|XP_005108543.1| PREDICTED: elongation factor 2-like [Aplysia calif…	0	2	2	0.564	0	1	1	1	547.795	1094.58	1094.58	-0.4	-0.00022	0/0	0	0	172018	HCD (High Energy Collision Dissociation)	MS2	9.97846	100	26.4957	4846	4846	4837	MCMMCM34021207.raw	F7	1120	2.11	1	0.0001881	3.64x10⁻⁵	1.584
High	Sequest HT	Sequest HT (A2)	A	2	Unambiguous	ENNPFHHAHIDVVNKDTTR	ENNPFHHAHIDVVNKDTTR		1	A0A6P7SER3	hemocyanin 1-like OS=Octopus vulgaris OX=6645 GN=LOC115212215 PE=4 SV=2	A0A6P7SER3	hemocyanin 1-like OS=Octopus vulgaris OX=6645 GN=LOC115212215 PE=4 SV=2	1	2	2	0.7564	0	1	1	1	1122.55	2244.09	2244.09	-0.43	-0.00049	0/0	0	0	140470	HCD (High Energy Collision Dissociation)	MS2	0	100	27.0801	4953	4953	4947	MCMMCM34021207.raw	F7	1281	3.53	1	0.0001881	4.18x10⁻⁷	2.346
High	Sequest HT	Sequest HT (A2)	A	2	Unambiguous	KNVNSLTPSDIK	KNVNSLTPSDIK		5	O61363; A0A6P7SDC4; Q5XLV2; Cluster-58773.162319;orf1 len=2921 frame:3 start:24 end:8786 gi	Hemocyanin G-type, units Oda to Odg OS=Enteroctopus dofleini OX=267067 GN=ODHCY PE=1 SV=1 hemocyanin G-type, units Oda to Odg OS=Octopus vulgaris OX=6645 GN=LOC115211670 PE=4 SV=2 Hemocyanin A-type (Fragment) OS=Enteroctopus dofleini OX=267067 GN=HA PE=4 SV=1 16596797 gb|AAK28276.2| hemocyanin G-type [Enteroctopus dofleini]	O61363; A0A6P7SDC4; P12659; Q5XLV2; Cluster-58773.162319;orf1 len=2921 frame:3 start:24 end:8786 gi	Hemocyanin G-type, units Oda to Odg OS=Enteroctopus dofleini OX=267067 GN=ODHCY PE=1 SV=1; hemocyanin G-type, units Oda to Odg OS=Octopus vulgaris OX=6645 GN=LOC115211670 PE=4 SV=2; Hemocyanin A-type, units Ode to Odg (Fragment) OS=Enteroctopus dofleini OX=267067 PE=2 SV=2; Hemocyanin A-type (Fragment) OS=Enteroctopus dofleini OX=267067 GN=HA PE=4 SV=1; 16596797 gb|AAK28276.2| hemocyanin G-type […	1	2	2	0.2183	0	1	1	1	658.365	1315.72	1315.72	1.37	0.0009	0/0	0	0	185150	HCD (High Energy Collision Dissociation)	MS2	57.6444	100	26.8768	4915	4915	4914	MCMMCM34021207.raw	F7	1256	3.39	4	0.0001881	1.32x10⁻⁴	1.365
High	Sequest HT	Sequest HT (A2)	A	2	Unambiguous	ENNPFHHAHIDVVNKDTTR	ENNPFHHAHIDVVNKDTTR		1	A0A6P7SER3	hemocyanin 1-like OS=Octopus vulgaris OX=6645 GN=LOC115212215 PE=4 SV=2	A0A6P7SER3	hemocyanin 1-like OS=Octopus vulgaris OX=6645 GN=LOC115212215 PE=4 SV=2	1	3	3	0.6513	0	1	1	1	748.701	2244.09	2244.09	-0.23	-0.00017	0/0	0	0	88299.5	HCD (High Energy Collision Dissociation)	MS2	0	100	26.8442	4910	4910	4903	MCMMCM34021207.raw	F7	1292	4.56	1	0.0001881	1.30x10⁻⁷	2.544
High	Sequest HT	Sequest HT (A2)	A	2	Unambiguous	ENNPFHHAHIDVVNKDTTR	ENNPFHHAHIDVVNKDTTR		1	A0A6P7SER3	hemocyanin 1-like OS=Octopus vulgaris OX=6645 GN=LOC115212215 PE=4 SV=2	A0A6P7SER3	hemocyanin 1-like OS=Octopus vulgaris OX=6645 GN=LOC115212215 PE=4 SV=2	1	4	4	0.5903	0	1	1	1	561.779	2244.09	2244.09	0.82	0.00046	0/0	0	0	1.33003e+06	HCD (High Energy Collision Dissociation)	MS2	0.366693	23.408	26.8181	4904	4904	4903	MCMMCM34021207.raw	F7	1291	4.93	1	0.0001881	2.17x10⁻⁶	2.065
High	Sequest HT	Sequest HT (A2)	A	2	Unambiguous	GYGPHNSVYSPDGR	GYGPHNSVYSPDGR		39	A0A7E6F8D1	neuroblast differentiation-associated protein AHNAK isoform X37 OS=Octopus vulgaris OX=6645 GN=LOC115218249 PE=4 SV=1	A0A7E6F8D1; A0A7E6F8A2; A0A7E6F8A6; A0A6P7T0A6; A0A7E6F9S0; A0A7E6F8C0; A0A6P7T0F8; A0A7E6F8A7; A0A6P7SZQ0; A0A7E6F8B0; A0A7E6F8B7; A0A7E6F9R5; A0A7E6F9R0; A0A7E6FAM6; A0A7E6FAN6; A0A7E6F8C9; A0A6P7SZP6; A0A7E6F8B2; A0A7E6F9Q4; A0A7E6F8Z4; A0A7E6F8C3; A0A7E6F9P9; A0A7E6FAN1; A0A7E6FAP7; A0A6P7T1G0; A0A6P7T0B0; A0A7E6FAQ3; Cluster-58773.139705;orf1 len=195 frame:-2 start:585 end:1 gi; A0A7E6F900; …	neuroblast differentiation-associated protein AHNAK isoform X37 OS=Octopus vulgaris OX=6645 GN=LOC115218249 PE=4 SV=1; neuroblast differentiation-associated protein AHNAK isoform X4 OS=Octopus vulgaris OX=6645 GN=LOC115218249 PE=4 SV=1; uncharacterized protein LOC115218249 isoform X9 OS=Octopus vulgaris OX=6645 GN=LOC115218249 PE=4 SV=1; uncharacterized protein LOC115218249 isoform X18 OS=Octopus…	0	3	3	0.446	0	1	1	1	502.563	1505.68	1505.68	-0.92	-0.00046	0/0	0	0	74390.9	HCD (High Energy Collision Dissociation)	MS2	18.913	100	26.7936	4901	4901	4892	MCMMCM34021207.raw	F7	532	2.13	1	0.0001881	1.16x10⁻²	0.6
High	Sequest HT	Sequest HT (A2)	A	2	Unambiguous	NSETNIDCSYR	NSETNIDcSYR	C8(Carbamidomethyl)	10	A0A6P7TJS2	insulin-like growth factor-binding protein complex acid labile subunit isoform X1 OS=Octopus vulgaris OX=6645 GN=LOC115225305 PE=4 SV=1	Cluster-58773.43951;orf1 len=97 frame:1 start:73 end:363 gi; A0A7E6FQN6; Cluster-51383.0;orf1 len=267 frame:1 start:73 end:873 gi; A0A7E6FQ69; A0A6P7TJS2; A0A7E6FQN1; A0A7E6FSM9; A0A7E6FQI0; A0A7E6FQL1; Cluster-77985.0;orf1 len=149 frame:1 start:73 end:519 gi	847121305 ref|XP_012817240.1| PREDICTED: leucine-rich repeat and transmembrane domain-containing protein 1 [Xenopus (Silurana) tropicalis]; insulin-like growth factor-binding protein complex acid labile subunit isoform X7 OS=Octopus vulgaris OX=6645 GN=LOC115225305 PE=4 SV=1; 470289262 ref|XP_004342830.1| tyrosine-protein kinase Src42A [Capsaspora owczarzaki ATCC 30864]>gi|765557372|gb|KJE97648.1…	0	2	2	0.7851	0	1	1	1	679.786	1358.56	1358.56	0.08	5e-05	0/0	0	0	173020	HCD (High Energy Collision Dissociation)	MS2	13.5512	100	26.7705	4896	4896	4892	MCMMCM34021207.raw	F7	144	3.63	1	0.0001881	9.64x10⁻⁶	1.811
High	Sequest HT	Sequest HT (A2)	A	2	Unambiguous	VAVCVPTDDKR	VAVcVPTDDKR	C4(Carbamidomethyl)	3	A0A6P7SER3; Cluster-58773.162319;orf1 len=2921 frame:3 start:24 end:8786 gi	hemocyanin 1-like OS=Octopus vulgaris OX=6645 GN=LOC115212215 PE=4 SV=2 16596797 gb|AAK28276.2| hemocyanin G-type [Enteroctopus dofleini]	A0A6P7SER3; Cluster-58773.162316;orf1 len=2526 frame:3 start:24 end:7601 gi; Cluster-58773.162319;orf1 len=2921 frame:3 start:24 end:8786 gi	hemocyanin 1-like OS=Octopus vulgaris OX=6645 GN=LOC115212215 PE=4 SV=2; 16596797 gb|AAK28276.2| hemocyanin G-type [Enteroctopus dofleini]; 16596797 gb|AAK28276.2| hemocyanin G-type [Enteroctopus dofleini]	1	2	2	0.619	0	1	1	1	630.325	1259.64	1259.64	0.42	0.00027	0/0	0	0	1.31476e+06	HCD (High Energy Collision Dissociation)	MS2	7.25259	49.876	26.7576	4893	4893	4892	MCMMCM34021207.raw	F7	1394	3.57	2	0.0001881	5.05x10⁻⁵	1.528
High	Sequest HT	Sequest HT (A2)	A	2	Unambiguous	AEQNYLTSPGVKK	AEQNYLTSPGVKK		3	A0A6P7TFQ1	Tetraspanin OS=Octopus vulgaris OX=6645 GN=LOC115222869 PE=3 SV=1	Cluster-58773.138742;orf1 len=239 frame:1 start:79 end:795 gi; A0A6P7TFQ1; Cluster-58773.138741;orf1 len=249 frame:1 start:79 end:825 gi	506968275 gb|AGM32481.1| tetraspanin D107 [Coptotermes formosanus]; Tetraspanin OS=Octopus vulgaris OX=6645 GN=LOC115222869 PE=3 SV=1; 506968275 gb|AGM32481.1| tetraspanin D107 [Coptotermes formosanus]	1	3	3	0.3136	0	1	1	1	478.923	1434.76	1434.76	-1.95	-0.00093	0/0	0	0	151627	HCD (High Energy Collision Dissociation)	MS2	28.9164	100	26.725	4888	4888	4881	MCMMCM34021207.raw	F7	1563	2.36	1	0.0001881	4.13x10⁻³	0.777
High	Sequest HT	Sequest HT (A2)	A	2	Unambiguous	NNQWNEDGVK	NNQWNEDGVK		8	A0A7E6F2K4	DBH-like monooxygenase protein 1 OS=Octopus vulgaris OX=6645 GN=LOC115214886 PE=3 SV=1	A0A7E6F2K4; Cluster-58773.159617;orf1 len=596 frame:1 start:112 end:1899 gi; Cluster-58773.158192;orf1 len=223 frame:-1 start:685 end:17 gi; Cluster-58773.159618;orf1 len=189 frame:1 start:1 end:567 gi; Cluster-58773.158577;orf1 len=590 frame:1 start:112 end:1881 gi; Cluster-58773.159614;orf1 len=324 frame:-1 start:979 end:8 gi; A0A7E6F115; Cluster-58773.159615;orf1 len=323 frame:-1 start:976 end…	DBH-like monooxygenase protein 1 OS=Octopus vulgaris OX=6645 GN=LOC115214886 PE=3 SV=1; 632962755 ref|XP_007897496.1| PREDICTED: DBH-like monooxygenase protein 1 [Callorhinchus milii]; 395816866 ref|XP_003781905.1| PREDICTED: DBH-like monooxygenase protein 1 [Otolemur garnettii]; 348565440 ref|XP_003468511.1| PREDICTED: DBH-like monooxygenase protein 1 isoform X1 [Cavia porcellus]; 632962755 ref|…	0	2	2	0.4975	0	1	1	1	602.272	1203.54	1203.54	-1.01	-0.00061	0/0	0	0	166663	HCD (High Energy Collision Dissociation)	MS2	7.31781	100	26.7158	4886	4886	4881	MCMMCM34021207.raw	F7	397	1.99	1	0.0001881	6.15x10⁻³	0.709
High	Sequest HT	Sequest HT (A2)	A	2	Unambiguous	ENNPFHHAHIDVVNKDTTR	ENNPFHHAHIDVVNKDTTR		1	A0A6P7SER3	hemocyanin 1-like OS=Octopus vulgaris OX=6645 GN=LOC115212215 PE=4 SV=2	A0A6P7SER3	hemocyanin 1-like OS=Octopus vulgaris OX=6645 GN=LOC115212215 PE=4 SV=2	1	5	5	0.3627	0	1	1	1	449.624	2244.09	2244.09	0.26	0.00012	0/0	0	0	4.19665e+06	HCD (High Energy Collision Dissociation)	MS2	4.44921	6.38	26.9991	4937	4937	4936	MCMMCM34021207.raw	F7	1268	3.86	1	0.0001881	1.67x10⁻⁴	1.325
High	Sequest HT	Sequest HT (A2)	A	2	Unambiguous	EHFCSHREDASVVCSER	EHFcSHREDASVVcSER	C4(Carbamidomethyl); C14(Carbamidomethyl)	1	A0A6P7SR15	neurotrypsin OS=Octopus vulgaris OX=6645 GN=LOC115215631 PE=4 SV=1	A0A6P7SR15	neurotrypsin OS=Octopus vulgaris OX=6645 GN=LOC115215631 PE=4 SV=1	1	4	4	0.6138	0	1	1	1	526.978	2104.89	2104.89	-1.92	-0.00101	0/0	0	0	169346	HCD (High Energy Collision Dissociation)	MS2	17.563	100	20.883	3805	3805	3803	MCMMCM34021207.raw	F7	205	3.34	1	0.0001881	1.02x10⁻³	1.017
High	Sequest HT	Sequest HT (A2)	A	2	Unambiguous	LSTVSSCTQAR	LSTVSScTQAR	C7(Carbamidomethyl)	3	Cluster-58773.172639;orf1 len=1824 frame:3 start:3 end:5474 gi	676448367 ref|XP_009051709.1| hypothetical protein LOTGIDRAFT_228404 [Lottia gigantea]>gi|556109217|gb|ESO97869.1| hypothetical protein LOTGIDRAFT_228404 [Lottia gigantea]	Cluster-58773.172641;orf1 len=1537 frame:1 start:673 end:5283 gi; Cluster-58773.172639;orf1 len=1824 frame:3 start:3 end:5474 gi; A0A0L8GRX6	762114369 ref|XP_011439962.1| PREDICTED: MAM and LDL-receptor class A domain-containing protein 2-like [Crassostrea gigas]; 676448367 ref|XP_009051709.1| hypothetical protein LOTGIDRAFT_228404 [Lottia gigantea]>gi|556109217|gb|ESO97869.1| hypothetical protein LOTGIDRAFT_228404 [Lottia gigantea]; Uncharacterized protein OS=Octopus bimaculoides OX=37653 GN=OCBIM_22029252mg PE=4 SV=1	0	2	2	0.566	0	1	1	1	605.296	1209.59	1209.59	-2.92	-0.00177	0/0	0	0	41744.2	HCD (High Energy Collision Dissociation)	MS2	21.5273	100	20.8495	3800	3800	3792	MCMMCM34021207.raw	F7	1171	2.12	1	0.0001881	1.16x10⁻³	0.994
High	Sequest HT	Sequest HT (A2)	A	2	Unambiguous	IDGKPLTENDR	IDGKPLTENDR		4	A0A6P7SI10; Cluster-58773.163438;orf1 len=994 frame:2 start:254 end:3235 gi	CD109 antigen isoform X2 OS=Octopus vulgaris OX=6645 GN=LOC115213260 PE=4 SV=1 410935705 gb|AFV94409.1| thioester-containing protein 1 [Euprymna scolopes]	A0A6P7SI10; A0A7E6F3R1; Cluster-58773.163438;orf1 len=994 frame:2 start:254 end:3235 gi; Cluster-58773.160937;orf1 len=552 frame:-3 start:1658 end:3 gi	CD109 antigen isoform X2 OS=Octopus vulgaris OX=6645 GN=LOC115213260 PE=4 SV=1; CD109 antigen isoform X1 OS=Octopus vulgaris OX=6645 GN=LOC115213260 PE=4 SV=1; 410935705 gb|AFV94409.1| thioester-containing protein 1 [Euprymna scolopes]; 410935705 gb|AFV94409.1| thioester-containing protein 1 [Euprymna scolopes]	0	2	2	0.5188	0	1	1	1	629.324	1257.64	1257.64	-1.62	-0.00102	0/0	0	0	34094.1	HCD (High Energy Collision Dissociation)	MS2	0	100	20.4776	3732	3732	3726	MCMMCM34021207.raw	F7	1198	1.6	2	0.0001881	1.48x10⁻³	0.953
High	Sequest HT	Sequest HT (A2)	A	2	Unambiguous	WLTSDELADLYK	WLTSDELADLYK		3	A0A6P7TPW3	2-phospho-D-glycerate hydro-lyase OS=Octopus vulgaris OX=6645 GN=LOC115224300 PE=3 SV=1	A0A6P7TPW3; Cluster-58773.161192;orf1 len=376 frame:2 start:422 end:1549 gi; Cluster-58773.161191;orf1 len=454 frame:1 start:424 end:1785 gi	2-phospho-D-glycerate hydro-lyase OS=Octopus vulgaris OX=6645 GN=LOC115224300 PE=3 SV=1; 675859332 ref|XP_009015226.1| hypothetical protein HELRODRAFT_184900 [Helobdella robusta]>gi|555702625|gb|ESO05858.1| hypothetical protein HELRODRAFT_184900 [Helobdella robusta]; 762107263 ref|XP_011436228.1| PREDICTED: enolase-like isoform X2 [Crassostrea gigas]	0	2	2	0.5217	0	1	1	1	727.364	1453.72	1453.72	0.05	4e-05	0/0	0	0	463950	HCD (High Energy Collision Dissociation)	MS2	19.1835	100	65.7797	12444	12444	12439	MCMMCM34021206.raw	F6	1293	1.84	1	0.0001881	1.15x10⁻²	0.601
High	Sequest HT	Sequest HT (A2)	A	2	Unambiguous	KTFVTDYIFPAIQGNAVYEDR	KTFVTDYIFPAIQGNAVYEDR		4	A0A6P7SNW2	Argininosuccinate synthase OS=Octopus vulgaris OX=6645 GN=LOC115214493 PE=3 SV=1	Cluster-58773.167310;orf2 len=287 frame:2 start:464 end:1324 gi; Cluster-58773.167315;orf1 len=313 frame:2 start:464 end:1402 gi; A0A6P7SNW2; Cluster-58773.167313;orf1 len=423 frame:3 start:474 end:1742 gi	513137512 gb|AGO20698.1| argininosuccinate synthetase [Protopterus annectens]; 638253347 ref|NP_001279058.1| argininosuccinate synthase 1 [Callorhinchus milii]>gi|387915462|gb|AFK11340.1| Argininosuccinate synthase [Callorhinchus milii]; Argininosuccinate synthase OS=Octopus vulgaris OX=6645 GN=LOC115214493 PE=3 SV=1; 513137512 gb|AGO20698.1| argininosuccinate synthetase [Protopterus annectens]	1	3	3	0.6838	0	1	1	1	816.413	2447.22	2447.22	0.02	2e-05	0/0	0	0	181033	HCD (High Energy Collision Dissociation)	MS2	25.1954	100	65.7177	12432	12432	12428	MCMMCM34021206.raw	F6	1385	3.7	1	0.0001881	2.69x10⁻⁷	2.421
High	Sequest HT	Sequest HT (A2)	A	2	Unambiguous	EQPNEFWSPLLEK	EQPNEFWSPLLEK		4	Cluster-58773.134683;orf1 len=709 frame:1 start:163 end:2289 gi	762081143 ref|XP_011420776.1| PREDICTED: calpain-9-like [Crassostrea gigas]	Cluster-58773.134687;orf1 len=696 frame:1 start:163 end:2250 gi; Cluster-58773.134685;orf1 len=675 frame:1 start:163 end:2187 gi; A0A0L8HZ41; Cluster-58773.134683;orf1 len=709 frame:1 start:163 end:2289 gi	762081143 ref|XP_011420776.1| PREDICTED: calpain-9-like [Crassostrea gigas]; 762081143 ref|XP_011420776.1| PREDICTED: calpain-9-like [Crassostrea gigas]; Calpain catalytic domain-containing protein OS=Octopus bimaculoides OX=37653 GN=OCBIM_22001620mg PE=3 SV=1; 762081143 ref|XP_011420776.1| PREDICTED: calpain-9-like [Crassostrea gigas]	0	2	2	0.1935	0	1	1	1	808.901	1616.79	1616.8	-0.57	-0.00046	0/0	0	0	247632	HCD (High Energy Collision Dissociation)	MS2	22.9975	100	65.6663	12423	12423	12417	MCMMCM34021206.raw	F6	1251	1.86	1	0.0001881	1.83x10⁻³	0.917
High	Sequest HT	Sequest HT (A2)	A	2	Unambiguous	LHFFMPGFAPLTSR	LHFFMPGFAPLTSR		27	A0A0L8GJ55	Tubulin beta chain OS=Octopus bimaculoides OX=37653 GN=OCBIM_22032594mg PE=3 SV=1	A0A0L8FVC9; A0A6P7SZY4; A0A6P7SDE2; P35394; Cluster-92874.1;orf1 len=82 frame:1 start:1048 end:1293 gi; A0A0L8I033; Cluster-58773.155296;orf1 len=454 frame:1 start:361 end:1722 sp; A0A0L8HRR7; Cluster-58773.155297;orf2 len=295 frame:1 start:646 end:1530 sp; A0A0L8GQL2; A0A812DI02; I0JGU7; A0A6P7TFJ5; Cluster-58773.194435;orf1 len=448 frame:1 start:154 end:1497 gi; A0A812DHL7; Cluster-92874.1;orf2…	Tubulin beta chain (Fragment) OS=Octopus bimaculoides OX=37653 GN=OCBIM_22006874mg PE=3 SV=1; Tubulin beta chain OS=Octopus vulgaris OX=6645 GN=LOC115218346 PE=3 SV=1; Tubulin beta chain OS=Octopus vulgaris OX=6645 GN=LOC115211583 PE=3 SV=1; Tubulin beta chain OS=Enteroctopus dofleini OX=267067 PE=2 SV=1; 634865305 ref|XP_007945164.1| PREDICTED: tubulin beta-4B chain isoform X1 [Orycteropus afer …	0	3	3	0.6684	0	1	1	1	540.949	1620.83	1620.84	-1.56	-0.00085	0/0	0	0	265459	HCD (High Energy Collision Dissociation)	MS2	0	100	65.6525	12420	12420	12417	MCMMCM34021206.raw	F6	1529	3.95	1	0.0001881	1.69x10⁻⁵	1.715
High	Sequest HT	Sequest HT (A2)	A	2	Unambiguous	TDHQPVNEASYVNIPVIALCNTDSPLK	TDHQPVNEASYVNIPVIALcNTDSPLK	C20(Carbamidomethyl)	4	A0A0L8HYK6	40S ribosomal protein SA OS=Octopus bimaculoides OX=37653 GN=OCBIM_22002200mg PE=3 SV=1	A0A0L8HYK6; Cluster-58773.162507;orf1 len=334 frame:3 start:282 end:1283 gi; A0A6P7TLB3; A0A812DAI3	40S ribosomal protein SA OS=Octopus bimaculoides OX=37653 GN=OCBIM_22002200mg PE=3 SV=1; 229891605 sp|A3RLT6.1|RSSA_PINFU RecName: Full=40S ribosomal protein SA [Pinctada fucata]>gi|126362082|gb|ABO10190.1| 67kD laminin receptor precursor [Pinctada fucata]; 40S ribosomal protein SA OS=Octopus vulgaris OX=6645 GN=LOC115225843 PE=3 SV=1; 40S ribosomal protein SA OS=Sepia pharaonis OX=158019 GN=SPHA…	0	3	3	0.6768	0	1	1	1	999.168	2995.49	2995.48	2.56	0.00256	0/0	0	0	216286	HCD (High Energy Collision Dissociation)	MS2	0	100	65.6167	12414	12414	12406	MCMMCM34021206.raw	F6	1285	4.27	1	0.0001881	1.07x10⁻⁵	1.793
High	Sequest HT	Sequest HT (A2)	A	2	Unambiguous	TVLVTTTQSADYVLEVLKK	TVLVTTTQSADYVLEVLKK		1	Cluster-58773.214625;orf1 len=76 frame:-2 start:394 end:167 gi	676443781 ref|XP_009050218.1| hypothetical protein LOTGIDRAFT_226396 [Lottia gigantea]>gi|556110456|gb|ESO99107.1| hypothetical protein LOTGIDRAFT_226396 [Lottia gigantea]	Cluster-58773.214625;orf1 len=76 frame:-2 start:394 end:167 gi	676443781 ref|XP_009050218.1| hypothetical protein LOTGIDRAFT_226396 [Lottia gigantea]>gi|556110456|gb|ESO99107.1| hypothetical protein LOTGIDRAFT_226396 [Lottia gigantea]	1	3	3	0.7256	0	1	1	1	703.399	2108.18	2108.18	-0.59	-0.00042	0/0	0	0	382356	HCD (High Energy Collision Dissociation)	MS2	36.9593	100	65.6122	12413	12413	12406	MCMMCM34021206.raw	F6	461	3.17	1	0.0001881	1.88x10⁻⁶	2.089
High	Sequest HT	Sequest HT (A2)	A	2	Unambiguous	NFHYEYDVLELNGLSIPK	NFHYEYDVLELNGLSIPK		5	A0A0L8GNM6; A0A6P7SER3; A0A6P7SDC4; Cluster-58773.162319;orf1 len=2921 frame:3 start:24 end:8786 gi	Uncharacterized protein OS=Octopus bimaculoides OX=37653 GN=OCBIM_22031096mg PE=4 SV=1 hemocyanin 1-like OS=Octopus vulgaris OX=6645 GN=LOC115212215 PE=4 SV=2 hemocyanin G-type, units Oda to Odg OS=Octopus vulgaris OX=6645 GN=LOC115211670 PE=4 SV=2 16596797 gb|AAK28276.2| hemocyanin G-type [Enteroctopus dofleini]	A0A0L8GNM6; A0A6P7SER3; Cluster-58773.162316;orf1 len=2526 frame:3 start:24 end:7601 gi; A0A6P7SDC4; Cluster-58773.162319;orf1 len=2921 frame:3 start:24 end:8786 gi	Uncharacterized protein OS=Octopus bimaculoides OX=37653 GN=OCBIM_22031096mg PE=4 SV=1; hemocyanin 1-like OS=Octopus vulgaris OX=6645 GN=LOC115212215 PE=4 SV=2; 16596797 gb|AAK28276.2| hemocyanin G-type [Enteroctopus dofleini]; hemocyanin G-type, units Oda to Odg OS=Octopus vulgaris OX=6645 GN=LOC115211670 PE=4 SV=2; 16596797 gb|AAK28276.2| hemocyanin G-type [Enteroctopus dofleini]	0	2	2	0.7368	0	1	1	1	1076.04	2151.08	2151.08	-0.27	-0.00029	0/0	0	0	354676	HCD (High Energy Collision Dissociation)	MS2	10.5278	100	65.5111	12393	12393	12384	MCMMCM34021206.raw	F6	1443	2.85	4	0.0001881	5.48x10⁻³	0.729
High	Sequest HT	Sequest HT (A2)	A	2	Unambiguous	DIRPELFEISGGEGSTLYR	DIRPELFEISGGEGSTLYR		4	A0A6P7SER3; A0A6P7SDC4; Cluster-58773.162319;orf1 len=2921 frame:3 start:24 end:8786 gi	hemocyanin 1-like OS=Octopus vulgaris OX=6645 GN=LOC115212215 PE=4 SV=2 hemocyanin G-type, units Oda to Odg OS=Octopus vulgaris OX=6645 GN=LOC115211670 PE=4 SV=2 16596797 gb|AAK28276.2| hemocyanin G-type [Enteroctopus dofleini]	A0A6P7SER3; Cluster-58773.162316;orf1 len=2526 frame:3 start:24 end:7601 gi; A0A6P7SDC4; Cluster-58773.162319;orf1 len=2921 frame:3 start:24 end:8786 gi	hemocyanin 1-like OS=Octopus vulgaris OX=6645 GN=LOC115212215 PE=4 SV=2; 16596797 gb|AAK28276.2| hemocyanin G-type [Enteroctopus dofleini]; hemocyanin G-type, units Oda to Odg OS=Octopus vulgaris OX=6645 GN=LOC115211670 PE=4 SV=2; 16596797 gb|AAK28276.2| hemocyanin G-type [Enteroctopus dofleini]	0	3	3	0.6131	0	1	1	1	713.695	2139.07	2139.07	-1	-0.00071	0/0	0	0	508442	HCD (High Energy Collision Dissociation)	MS2	12.1654	64.587	65.4909	12388	12388	12384	MCMMCM34021206.raw	F6	1310	3.98	3	0.0001881	5.67x10⁻⁶	1.901
High	Sequest HT	Sequest HT (A2)	A	2	Unambiguous	NFHYEYDVLELNGLSIPK	NFHYEYDVLELNGLSIPK		5	A0A0L8GNM6; A0A6P7SER3; A0A6P7SDC4; Cluster-58773.162319;orf1 len=2921 frame:3 start:24 end:8786 gi	Uncharacterized protein OS=Octopus bimaculoides OX=37653 GN=OCBIM_22031096mg PE=4 SV=1 hemocyanin 1-like OS=Octopus vulgaris OX=6645 GN=LOC115212215 PE=4 SV=2 hemocyanin G-type, units Oda to Odg OS=Octopus vulgaris OX=6645 GN=LOC115211670 PE=4 SV=2 16596797 gb|AAK28276.2| hemocyanin G-type [Enteroctopus dofleini]	A0A0L8GNM6; A0A6P7SER3; Cluster-58773.162316;orf1 len=2526 frame:3 start:24 end:7601 gi; A0A6P7SDC4; Cluster-58773.162319;orf1 len=2921 frame:3 start:24 end:8786 gi	Uncharacterized protein OS=Octopus bimaculoides OX=37653 GN=OCBIM_22031096mg PE=4 SV=1; hemocyanin 1-like OS=Octopus vulgaris OX=6645 GN=LOC115212215 PE=4 SV=2; 16596797 gb|AAK28276.2| hemocyanin G-type [Enteroctopus dofleini]; hemocyanin G-type, units Oda to Odg OS=Octopus vulgaris OX=6645 GN=LOC115211670 PE=4 SV=2; 16596797 gb|AAK28276.2| hemocyanin G-type [Enteroctopus dofleini]	0	3	3	0.6289	0	1	1	1	717.696	2151.07	2151.08	-1.11	-0.00079	0/0	0	0	650694	HCD (High Energy Collision Dissociation)	MS2	43.8762	49.377	65.4246	12375	12375	12373	MCMMCM34021206.raw	F6	1492	3.18	4	0.0001881	1.78x10⁻⁴	1.314
High	Sequest HT	Sequest HT (A2)	A	2	Unambiguous	IYYSGPNGIISPFHDIPLYSNTSK	IYYSGPNGIISPFHDIPLYSNTSK		4	A0A6P7SIX4	Inorganic diphosphatase OS=Octopus vulgaris OX=6645 GN=LOC115213471 PE=3 SV=2	Cluster-58773.174399;orf1 len=476 frame:3 start:30 end:1457 gi; A0A6P7SIX4; A0A0L8HPX8; Cluster-58773.174398;orf1 len=474 frame:3 start:30 end:1451 gi	762094182 ref|XP_011429567.1| PREDICTED: inorganic pyrophosphatase-like isoform X2 [Crassostrea gigas]; Inorganic diphosphatase OS=Octopus vulgaris OX=6645 GN=LOC115213471 PE=3 SV=2; Inorganic diphosphatase OS=Octopus bimaculoides OX=37653 GN=OCBIM_22009426mg PE=3 SV=1; 762094182 ref|XP_011429567.1| PREDICTED: inorganic pyrophosphatase-like isoform X2 [Crassostrea gigas]	0	3	3	0.481	0	1	1	1	895.118	2683.34	2683.34	0	0	0/0	0	0	265411	HCD (High Energy Collision Dissociation)	MS2	7.47495	100	65.378	12367	12367	12362	MCMMCM34021206.raw	F6	1298	2.1	1	0.0001881	4.42x10⁻⁴	1.159
High	Sequest HT	Sequest HT (A2)	A	2	Unambiguous	KSVETLTEDEVLNLQVALR	KSVETLTEDEVLNLQVALR		4	A0A6P7SER3; A0A6P7SDC4; Cluster-58773.162319;orf1 len=2921 frame:3 start:24 end:8786 gi	hemocyanin 1-like OS=Octopus vulgaris OX=6645 GN=LOC115212215 PE=4 SV=2 hemocyanin G-type, units Oda to Odg OS=Octopus vulgaris OX=6645 GN=LOC115211670 PE=4 SV=2 16596797 gb|AAK28276.2| hemocyanin G-type [Enteroctopus dofleini]	A0A6P7SER3; Cluster-58773.162316;orf1 len=2526 frame:3 start:24 end:7601 gi; A0A6P7SDC4; Cluster-58773.162319;orf1 len=2921 frame:3 start:24 end:8786 gi	hemocyanin 1-like OS=Octopus vulgaris OX=6645 GN=LOC115212215 PE=4 SV=2; 16596797 gb|AAK28276.2| hemocyanin G-type [Enteroctopus dofleini]; hemocyanin G-type, units Oda to Odg OS=Octopus vulgaris OX=6645 GN=LOC115211670 PE=4 SV=2; 16596797 gb|AAK28276.2| hemocyanin G-type [Enteroctopus dofleini]	1	3	3	0.6553	0	1	1	1	719.73	2157.18	2157.18	-0.49	-0.00035	0/0	0	0	217604	HCD (High Energy Collision Dissociation)	MS2	4.43511	100	65.3689	12365	12365	12362	MCMMCM34021206.raw	F6	871	4.12	3	0.0001881	5.96x10⁻⁷	2.285
High	Sequest HT	Sequest HT (A2)	A	2	Unambiguous	SSDGFEAIASFHALPPLCPNPTAK	SSDGFEAIASFHALPPLcPNPTAK	C18(Carbamidomethyl)	4	A0A6P7SER3; A0A6P7SDC4; Cluster-58773.162319;orf1 len=2921 frame:3 start:24 end:8786 gi	hemocyanin 1-like OS=Octopus vulgaris OX=6645 GN=LOC115212215 PE=4 SV=2 hemocyanin G-type, units Oda to Odg OS=Octopus vulgaris OX=6645 GN=LOC115211670 PE=4 SV=2 16596797 gb|AAK28276.2| hemocyanin G-type [Enteroctopus dofleini]	A0A6P7SER3; Cluster-58773.162316;orf1 len=2526 frame:3 start:24 end:7601 gi; A0A6P7SDC4; Cluster-58773.162319;orf1 len=2921 frame:3 start:24 end:8786 gi	hemocyanin 1-like OS=Octopus vulgaris OX=6645 GN=LOC115212215 PE=4 SV=2; 16596797 gb|AAK28276.2| hemocyanin G-type [Enteroctopus dofleini]; hemocyanin G-type, units Oda to Odg OS=Octopus vulgaris OX=6645 GN=LOC115211670 PE=4 SV=2; 16596797 gb|AAK28276.2| hemocyanin G-type [Enteroctopus dofleini]	0	4	4	0.496	0	1	1	1	632.563	2527.23	2527.23	0.13	8e-05	0/0	0	0	497002	HCD (High Energy Collision Dissociation)	MS2	14.4098	33.216	65.3019	12352	12352	12351	MCMMCM34021206.raw	F6	1287	3.71	3	0.0001881	6.58x10⁻⁵	1.483
High	Sequest HT	Sequest HT (A2)	A	2	Unambiguous	TGAIVDVPVGPELLGR	TGAIVDVPVGPELLGR		2	Cluster-58773.166315;orf1 len=580 frame:1 start:268 end:2007 gi	116008297 gb|ABJ51956.1| mitochondrial H+ ATPase a subunit [Pinctada fucata]	A0A6P7T6U6; Cluster-58773.166315;orf1 len=580 frame:1 start:268 end:2007 gi	ATP synthase subunit alpha OS=Octopus vulgaris OX=6645 GN=LOC115220629 PE=3 SV=1; 116008297 gb|ABJ51956.1| mitochondrial H+ ATPase a subunit [Pinctada fucata]	0	2	2	0.7227	0	1	1	1	796.956	1592.9	1592.9	2.27	0.0018	0/0	0	0	283698	HCD (High Energy Collision Dissociation)	MS2	81.6053	100	65.2643	12346	12346	12340	MCMMCM34021206.raw	F6	632	3.57	1	0.0001881	1.92x10⁻⁵	1.693
High	Sequest HT	Sequest HT (A2)	A	2	Unambiguous	FSNENEPLVLQFTVK	FSNENEPLVLQFTVK		3	A0A7E6F2W5	Calreticulin OS=Octopus vulgaris OX=6645 GN=LOC115215618 PE=3 SV=1	Cluster-58773.173059;orf2 len=242 frame:2 start:863 end:1588 gi; A0A7E6F2W5; A0A0L8I919	406055040 gb|AFS33112.1| calreticulin [Hyriopsis cumingii]; Calreticulin OS=Octopus vulgaris OX=6645 GN=LOC115215618 PE=3 SV=1; Calreticulin OS=Octopus bimaculoides OX=37653 GN=OCBIM_22027793mg PE=3 SV=1	0	2	2	0.6008	0	1	1	1	882.963	1764.92	1764.92	0.65	0.00058	0/0	0	0	433926	HCD (High Energy Collision Dissociation)	MS2	15.0948	100	65.255	12344	12344	12340	MCMMCM34021206.raw	F6	1408	2.53	1	0.0001881	3.61x10⁻⁴	1.193
High	Sequest HT	Sequest HT (A2)	A	2	Unambiguous	FVELTLPPELK	FVELTLPPELK		3	A0A6P7SI10; Cluster-58773.163438;orf1 len=994 frame:2 start:254 end:3235 gi	CD109 antigen isoform X2 OS=Octopus vulgaris OX=6645 GN=LOC115213260 PE=4 SV=1 410935705 gb|AFV94409.1| thioester-containing protein 1 [Euprymna scolopes]	A0A6P7SI10; A0A7E6F3R1; Cluster-58773.163438;orf1 len=994 frame:2 start:254 end:3235 gi	CD109 antigen isoform X2 OS=Octopus vulgaris OX=6645 GN=LOC115213260 PE=4 SV=1; CD109 antigen isoform X1 OS=Octopus vulgaris OX=6645 GN=LOC115213260 PE=4 SV=1; 410935705 gb|AFV94409.1| thioester-containing protein 1 [Euprymna scolopes]	0	2	2	0.4479	0	1	1	1	643.373	1285.74	1285.74	-0.61	-0.00039	0/0	0	0	1.60221e+06	HCD (High Energy Collision Dissociation)	MS2	5.58176	37.86	65.2474	12342	12342	12340	MCMMCM34021206.raw	F6	871	1.92	2	0.0001881	2.62x10⁻³	0.855
High	Sequest HT	Sequest HT (A2)	A	2	Unambiguous	HEENCAHEAGVFSVLGGESEMPWQFDR	HEENcAHEAGVFSVLGGESEMPWQFDR	C5(Carbamidomethyl)	4	A0A6P7SER3; A0A6P7SDC4; Cluster-58773.162319;orf1 len=2921 frame:3 start:24 end:8786 gi	hemocyanin 1-like OS=Octopus vulgaris OX=6645 GN=LOC115212215 PE=4 SV=2 hemocyanin G-type, units Oda to Odg OS=Octopus vulgaris OX=6645 GN=LOC115211670 PE=4 SV=2 16596797 gb|AAK28276.2| hemocyanin G-type [Enteroctopus dofleini]	A0A6P7SER3; Cluster-58773.162316;orf1 len=2526 frame:3 start:24 end:7601 gi; A0A6P7SDC4; Cluster-58773.162319;orf1 len=2921 frame:3 start:24 end:8786 gi	hemocyanin 1-like OS=Octopus vulgaris OX=6645 GN=LOC115212215 PE=4 SV=2; 16596797 gb|AAK28276.2| hemocyanin G-type [Enteroctopus dofleini]; hemocyanin G-type, units Oda to Odg OS=Octopus vulgaris OX=6645 GN=LOC115211670 PE=4 SV=2; 16596797 gb|AAK28276.2| hemocyanin G-type [Enteroctopus dofleini]	0	4	4	0.7591	0	1	1	1	780.341	3118.34	3118.34	-0.31	-0.00024	0/0	0	0	2334436	HCD (High Energy Collision Dissociation)	MS2	2.80962	8.223	65.2445	12341	12341	12340	MCMMCM34021206.raw	F6	252	6.02	3	0.0001881	1.25x10⁻⁹	3.336
High	Sequest HT	Sequest HT (A2)	A	2	Unambiguous	HEENCAHEAGVFSVLGGESEMPWQFDR	HEENcAHEAGVFSVLGGESEMPWQFDR	C5(Carbamidomethyl)	4	A0A6P7SER3; A0A6P7SDC4; Cluster-58773.162319;orf1 len=2921 frame:3 start:24 end:8786 gi	hemocyanin 1-like OS=Octopus vulgaris OX=6645 GN=LOC115212215 PE=4 SV=2 hemocyanin G-type, units Oda to Odg OS=Octopus vulgaris OX=6645 GN=LOC115211670 PE=4 SV=2 16596797 gb|AAK28276.2| hemocyanin G-type [Enteroctopus dofleini]	A0A6P7SER3; Cluster-58773.162316;orf1 len=2526 frame:3 start:24 end:7601 gi; A0A6P7SDC4; Cluster-58773.162319;orf1 len=2921 frame:3 start:24 end:8786 gi	hemocyanin 1-like OS=Octopus vulgaris OX=6645 GN=LOC115212215 PE=4 SV=2; 16596797 gb|AAK28276.2| hemocyanin G-type [Enteroctopus dofleini]; hemocyanin G-type, units Oda to Odg OS=Octopus vulgaris OX=6645 GN=LOC115211670 PE=4 SV=2; 16596797 gb|AAK28276.2| hemocyanin G-type [Enteroctopus dofleini]	0	3	3	0.7983	0	1	1	1	1040.12	3118.34	3118.34	-0.76	-0.00079	0/0	0	0	328739	HCD (High Energy Collision Dissociation)	MS2	0	100	65.2159	12337	12337	12329	MCMMCM34021206.raw	F6	251	5.95	3	0.0001881	1.37x10⁻¹²	4.498
High	Sequest HT	Sequest HT (A2)	A	2	Unambiguous	TIGQSADVNFDICTK	TIGQSADVNFDIcTK	C13(Carbamidomethyl)	4	A0A0L8GNM6; A0A6P7SER3; A0A6P7SDC4; Cluster-58773.162319;orf1 len=2921 frame:3 start:24 end:8786 gi	Uncharacterized protein OS=Octopus bimaculoides OX=37653 GN=OCBIM_22031096mg PE=4 SV=1 hemocyanin 1-like OS=Octopus vulgaris OX=6645 GN=LOC115212215 PE=4 SV=2 hemocyanin G-type, units Oda to Odg OS=Octopus vulgaris OX=6645 GN=LOC115211670 PE=4 SV=2 16596797 gb|AAK28276.2| hemocyanin G-type [Enteroctopus dofleini]	A0A0L8GNM6; A0A6P7SER3; A0A6P7SDC4; Cluster-58773.162319;orf1 len=2921 frame:3 start:24 end:8786 gi	Uncharacterized protein OS=Octopus bimaculoides OX=37653 GN=OCBIM_22031096mg PE=4 SV=1; hemocyanin 1-like OS=Octopus vulgaris OX=6645 GN=LOC115212215 PE=4 SV=2; hemocyanin G-type, units Oda to Odg OS=Octopus vulgaris OX=6645 GN=LOC115211670 PE=4 SV=2; 16596797 gb|AAK28276.2| hemocyanin G-type [Enteroctopus dofleini]	0	2	2	0.4872	0	1	1	1	834.9	1668.79	1668.79	1.65	0.00138	0/0	0	0	146919	HCD (High Energy Collision Dissociation)	MS2	22.6246	100	65.7931	12447	12447	12439	MCMMCM34021206.raw	F6	1108	1.56	4	0.0001881	1.60x10⁻³	0.939
High	Sequest HT	Sequest HT (A2)	A	2	Unambiguous	HQNTDRVFASFLLFGIK	HQNTDRVFASFLLFGIK		1	A0A6P7SER3	hemocyanin 1-like OS=Octopus vulgaris OX=6645 GN=LOC115212215 PE=4 SV=2	A0A6P7SER3	hemocyanin 1-like OS=Octopus vulgaris OX=6645 GN=LOC115212215 PE=4 SV=2	1	4	4	0.707	0	1	1	1	499.021	1993.06	1993.07	-0.74	-0.00037	0/0	0	0	343114	HCD (High Energy Collision Dissociation)	MS2	1.07061	82.739	65.8425	12456	12456	12450	MCMMCM34021206.raw	F6	1091	4.88	1	0.0001881	3.65x10⁻⁵	1.584
High	Sequest HT	Sequest HT (A2)	A	2	Unambiguous	VEEVYDLGNLTFPDVGHDPPIK	VEEVYDLGNLTFPDVGHDPPIK		4	A0A6P7T4G9	Arginase OS=Octopus vulgaris OX=6645 GN=LOC115219198 PE=3 SV=1	Cluster-58773.144018;orf1 len=273 frame:-1 start:820 end:2 gi; Cluster-58773.144016;orf1 len=364 frame:1 start:145 end:1236 gi; A0A6P7T4G9; Cluster-58773.144017;orf1 len=326 frame:1 start:145 end:1122 gi	611998318 ref|XP_007484626.1| PREDICTED: arginase-1 [Monodelphis domestica]; 410960026 ref|XP_003986598.1| PREDICTED: arginase-1 [Felis catus]>gi|591303710|ref|XP_007078686.1| PREDICTED: arginase-1 [Panthera tigris altaica]; Arginase OS=Octopus vulgaris OX=6645 GN=LOC115219198 PE=3 SV=1; 611998318 ref|XP_007484626.1| PREDICTED: arginase-1 [Monodelphis domestica]	0	3	3	0.6383	0	1	1	1	818.744	2454.22	2454.22	-0.33	-0.00027	0/0	0	0	303709	HCD (High Energy Collision Dissociation)	MS2	12.6564	100	65.8467	12457	12457	12450	MCMMCM34021206.raw	F6	1380	2.35	1	0.0001881	7.48x10⁻⁴	1.069
High	Sequest HT	Sequest HT (A2)	A	2	Unambiguous	HQNTDRVFASFLLFGIK	HQNTDRVFASFLLFGIK		1	A0A6P7SER3	hemocyanin 1-like OS=Octopus vulgaris OX=6645 GN=LOC115212215 PE=4 SV=2	A0A6P7SER3	hemocyanin 1-like OS=Octopus vulgaris OX=6645 GN=LOC115212215 PE=4 SV=2	1	3	3	0.6082	0	1	1	1	665.027	1993.07	1993.07	-0.05	-4e-05	0/0	0	0	766782	HCD (High Energy Collision Dissociation)	MS2	30.8735	46.753	65.8841	12463	12463	12461	MCMMCM34021206.raw	F6	1096	3.19	1	0.0001881	5.42x10⁻⁴	1.124
High	Sequest HT	Sequest HT (A2)	A	2	Unambiguous	FVEVNDETHFTVK	FVEVNDETHFTVK		4	A0A6P7SI10; Cluster-58773.163438;orf1 len=994 frame:2 start:254 end:3235 gi	CD109 antigen isoform X2 OS=Octopus vulgaris OX=6645 GN=LOC115213260 PE=4 SV=1 410935705 gb|AFV94409.1| thioester-containing protein 1 [Euprymna scolopes]	A0A6P7SI10; A0A7E6F3R1; Cluster-58773.163438;orf1 len=994 frame:2 start:254 end:3235 gi; Cluster-58773.160937;orf1 len=552 frame:-3 start:1658 end:3 gi	CD109 antigen isoform X2 OS=Octopus vulgaris OX=6645 GN=LOC115213260 PE=4 SV=1; CD109 antigen isoform X1 OS=Octopus vulgaris OX=6645 GN=LOC115213260 PE=4 SV=1; 410935705 gb|AFV94409.1| thioester-containing protein 1 [Euprymna scolopes]; 410935705 gb|AFV94409.1| thioester-containing protein 1 [Euprymna scolopes]	0	3	3	0.5797	0	1	1	1	522.259	1564.76	1564.76	-0.42	-0.00022	0/0	0	0	228137	HCD (High Energy Collision Dissociation)	MS2	6.08194	100	66.4168	12566	12566	12560	MCMMCM34021206.raw	F6	1329	2.07	2	0.0001881	1.77x10⁻⁴	1.315
High	Sequest HT	Sequest HT (A2)	A	2	Unambiguous	ASADVHIYICVPTSK	ASADVHIYIcVPTSK	C10(Carbamidomethyl)	5	A0A6P7SER3; A0A0L8FFZ3; A0A6P7SDC4; Cluster-58773.162319;orf1 len=2921 frame:3 start:24 end:8786 gi	hemocyanin 1-like OS=Octopus vulgaris OX=6645 GN=LOC115212215 PE=4 SV=2 Tyrosinase_Cu-bd domain-containing protein (Fragment) OS=Octopus bimaculoides OX=37653 GN=OCBIM_22022789mg PE=4 SV=1 hemocyanin G-type, units Oda to Odg OS=Octopus vulgaris OX=6645 GN=LOC115211670 PE=4 SV=2 16596797 gb|AAK28276.2| hemocyanin G-type [Enteroctopus dofleini]	A0A6P7SER3; A0A0L8FFZ3; Cluster-58773.162316;orf1 len=2526 frame:3 start:24 end:7601 gi; A0A6P7SDC4; Cluster-58773.162319;orf1 len=2921 frame:3 start:24 end:8786 gi	hemocyanin 1-like OS=Octopus vulgaris OX=6645 GN=LOC115212215 PE=4 SV=2; Tyrosinase_Cu-bd domain-containing protein (Fragment) OS=Octopus bimaculoides OX=37653 GN=OCBIM_22022789mg PE=4 SV=1; 16596797 gb|AAK28276.2| hemocyanin G-type [Enteroctopus dofleini]; hemocyanin G-type, units Oda to Odg OS=Octopus vulgaris OX=6645 GN=LOC115211670 PE=4 SV=2; 16596797 gb|AAK28276.2| hemocyanin G-type [Enteroc…	0	3	3	0.3379	0	1	1	1	554.283	1660.83	1660.84	-1.43	-0.00079	0/0	0	0	147168	HCD (High Energy Collision Dissociation)	MS2	26.2993	100	66.3712	12558	12558	12549	MCMMCM34021206.raw	F6	1461	2.19	4	0.0001881	3.66x10⁻³	0.798
High	Sequest HT	Sequest HT (A2)	A	2	Unambiguous	IWAVWQALQK	IWAVWQALQK		5	A0A812CBN1; A0A6P7SER3; A0A6P7SDC4; Cluster-58773.162319;orf1 len=2921 frame:3 start:24 end:8786 gi	Uncharacterized protein OS=Sepia pharaonis OX=158019 GN=SPHA_33848 PE=4 SV=1 hemocyanin 1-like OS=Octopus vulgaris OX=6645 GN=LOC115212215 PE=4 SV=2 hemocyanin G-type, units Oda to Odg OS=Octopus vulgaris OX=6645 GN=LOC115211670 PE=4 SV=2 16596797 gb|AAK28276.2| hemocyanin G-type [Enteroctopus dofleini]	A0A812CBN1; A0A6P7SER3; W6CNR9; A0A6P7SDC4; Cluster-58773.162319;orf1 len=2921 frame:3 start:24 end:8786 gi	Uncharacterized protein OS=Sepia pharaonis OX=158019 GN=SPHA_33848 PE=4 SV=1; hemocyanin 1-like OS=Octopus vulgaris OX=6645 GN=LOC115212215 PE=4 SV=2; Hemocyanin subunit 3 OS=Sepia officinalis OX=6610 PE=2 SV=1; hemocyanin G-type, units Oda to Odg OS=Octopus vulgaris OX=6645 GN=LOC115211670 PE=4 SV=2; 16596797 gb|AAK28276.2| hemocyanin G-type [Enteroctopus dofleini]	0	2	2	0.2184	0	1	1	1	621.854	1242.7	1242.7	0.99	0.00062	0/0	0	0	5.71382e+06	HCD (High Energy Collision Dissociation)	MS2	2.31979	10.474	66.3369	12550	12550	12549	MCMMCM34021206.raw	F6	1098	2.61	4	0.0001881	1.49x10⁻³	0.952
High	Sequest HT	Sequest HT (A2)	A	2	Unambiguous	EAHLHYNDQYHIEYHVK	EAHLHYNDQYHIEYHVK		4	A0A6P7SER3; A0A6P7SDC4; Cluster-58773.162319;orf1 len=2921 frame:3 start:24 end:8786 gi	hemocyanin 1-like OS=Octopus vulgaris OX=6645 GN=LOC115212215 PE=4 SV=2 hemocyanin G-type, units Oda to Odg OS=Octopus vulgaris OX=6645 GN=LOC115211670 PE=4 SV=2 16596797 gb|AAK28276.2| hemocyanin G-type [Enteroctopus dofleini]	A0A6P7SER3; Cluster-58773.162316;orf1 len=2526 frame:3 start:24 end:7601 gi; A0A6P7SDC4; Cluster-58773.162319;orf1 len=2921 frame:3 start:24 end:8786 gi	hemocyanin 1-like OS=Octopus vulgaris OX=6645 GN=LOC115212215 PE=4 SV=2; 16596797 gb|AAK28276.2| hemocyanin G-type [Enteroctopus dofleini]; hemocyanin G-type, units Oda to Odg OS=Octopus vulgaris OX=6645 GN=LOC115211670 PE=4 SV=2; 16596797 gb|AAK28276.2| hemocyanin G-type [Enteroctopus dofleini]	0	5	5	0.3026	0	1	1	1	440.011	2196.03	2196.03	-0.29	-0.00013	0/0	0	0	157532	HCD (High Energy Collision Dissociation)	MS2	0	100	66.2984	12544	12544	12538	MCMMCM34021206.raw	F6	967	3.04	3	0.0001881	4.13x10⁻³	0.778
High	Sequest HT	Sequest HT (A2)	A	2	Unambiguous	ANSLEDELNFLR	ANSLEDELNFLR		4	Cluster-58773.156870;orf1 len=585 frame:-2 start:1926 end:172 gi	159741 gb|AAA16613.1| omega-crystallin [Enteroctopus dofleini]	Cluster-58773.156870;orf1 len=585 frame:-2 start:1926 end:172 gi; Cluster-58773.156874;orf1 len=588 frame:-2 start:1772 end:9 gi; A0A6P7TCR8; Cluster-58773.156873;orf1 len=489 frame:3 start:3 end:1469 gi	159741 gb|AAA16613.1| omega-crystallin [Enteroctopus dofleini]; 159741 gb|AAA16613.1| omega-crystallin [Enteroctopus dofleini]; 70 kDa neurofilament protein OS=Octopus vulgaris OX=6645 GN=LOC115222738 PE=3 SV=2; 159741 gb|AAA16613.1| omega-crystallin [Enteroctopus dofleini]	0	2	2	0.5342	0	1	1	1	710.857	1420.71	1420.71	-0.24	-0.00017	0/0	0	0	351226	HCD (High Energy Collision Dissociation)	MS2	37.4049	100	66.2892	12542	12542	12538	MCMMCM34021206.raw	F6	1513	3.22	1	0.0001881	1.83x10⁻⁵	1.702
High	Sequest HT	Sequest HT (A2)	A	2	Unambiguous	EAHLHYNDQYHIEYHVK	EAHLHYNDQYHIEYHVK		4	A0A6P7SER3; A0A6P7SDC4; Cluster-58773.162319;orf1 len=2921 frame:3 start:24 end:8786 gi	hemocyanin 1-like OS=Octopus vulgaris OX=6645 GN=LOC115212215 PE=4 SV=2 hemocyanin G-type, units Oda to Odg OS=Octopus vulgaris OX=6645 GN=LOC115211670 PE=4 SV=2 16596797 gb|AAK28276.2| hemocyanin G-type [Enteroctopus dofleini]	A0A6P7SER3; Cluster-58773.162316;orf1 len=2526 frame:3 start:24 end:7601 gi; A0A6P7SDC4; Cluster-58773.162319;orf1 len=2921 frame:3 start:24 end:8786 gi	hemocyanin 1-like OS=Octopus vulgaris OX=6645 GN=LOC115212215 PE=4 SV=2; 16596797 gb|AAK28276.2| hemocyanin G-type [Enteroctopus dofleini]; hemocyanin G-type, units Oda to Odg OS=Octopus vulgaris OX=6645 GN=LOC115211670 PE=4 SV=2; 16596797 gb|AAK28276.2| hemocyanin G-type [Enteroctopus dofleini]	0	4	4	0.3422	0	1	1	1	549.762	2196.03	2196.03	0.27	0.00015	0/0	0	0	218429	HCD (High Energy Collision Dissociation)	MS2	14.5089	100	66.2535	12536	12536	12527	MCMMCM34021206.raw	F6	969	2.63	3	0.0001881	1.31x10⁻³	0.974
High	Sequest HT	Sequest HT (A2)	A	2	Unambiguous	DLYANTVLSGGSTMYPGIADR	DLYANTVLSGGSTMYPGIADR		8	A0A6P7SM13	actin, cytoplasmic OS=Octopus vulgaris OX=6645 GN=LOC115214121 PE=3 SV=1	A0A6P7SKQ4; Q9NBZ1; Cluster-58773.161076;orf1 len=296 frame:2 start:2 end:889 gi; Q9NBY9; Q9NBY5; A0A6P7SM13; A0A0L8GHH1; Q9NBY7	actin, cytoplasmic OS=Octopus vulgaris OX=6645 GN=LOC115214120 PE=3 SV=1; Actin (Fragment) OS=Argonauta nodosa OX=61687 PE=3 SV=1; 469566230 gb|AGH58109.1| beta actin, partial [Microtus levis]; Actin (Fragment) OS=Bolitaena pygmaea OX=61709 PE=3 SV=1; Actin (Fragment) OS=Octopus tetricus OX=61678 PE=3 SV=1; actin, cytoplasmic OS=Octopus vulgaris OX=6645 GN=LOC115214121 PE=3 SV=1; Uncharacterized …	0	2	2	0.1043	0	1	1	1	1101.03	2201.06	2201.05	2.31	0.00255	0/0	0	0	260767	HCD (High Energy Collision Dissociation)	MS2	4.02227	100	66.2352	12532	12532	12527	MCMMCM34021206.raw	F6	1225	3.45	1	0.0001881	4.99x10⁻⁷	2.315
High	Sequest HT	Sequest HT (A2)	A	2	Unambiguous	DIRPELFEISGGEGSTLYR	DIRPELFEISGGEGSTLYR		4	A0A6P7SER3; A0A6P7SDC4; Cluster-58773.162319;orf1 len=2921 frame:3 start:24 end:8786 gi	hemocyanin 1-like OS=Octopus vulgaris OX=6645 GN=LOC115212215 PE=4 SV=2 hemocyanin G-type, units Oda to Odg OS=Octopus vulgaris OX=6645 GN=LOC115211670 PE=4 SV=2 16596797 gb|AAK28276.2| hemocyanin G-type [Enteroctopus dofleini]	A0A6P7SER3; Cluster-58773.162316;orf1 len=2526 frame:3 start:24 end:7601 gi; A0A6P7SDC4; Cluster-58773.162319;orf1 len=2921 frame:3 start:24 end:8786 gi	hemocyanin 1-like OS=Octopus vulgaris OX=6645 GN=LOC115212215 PE=4 SV=2; 16596797 gb|AAK28276.2| hemocyanin G-type [Enteroctopus dofleini]; hemocyanin G-type, units Oda to Odg OS=Octopus vulgaris OX=6645 GN=LOC115211670 PE=4 SV=2; 16596797 gb|AAK28276.2| hemocyanin G-type [Enteroctopus dofleini]	0	3	3	0.6284	0	1	1	1	713.694	2139.07	2139.07	-2.3	-0.00164	0/0	0	0	263034	HCD (High Energy Collision Dissociation)	MS2	76.8566	100	66.1996	12526	12526	12516	MCMMCM34021206.raw	F6	1316	4.01	3	0.0001881	5.32x10⁻⁷	2.304
High	Sequest HT	Sequest HT (A2)	A	2	Unambiguous	SSDGFEAIASFHALPPLCPNPTAK	SSDGFEAIASFHALPPLcPNPTAK	C18(Carbamidomethyl)	4	A0A6P7SER3; A0A6P7SDC4; Cluster-58773.162319;orf1 len=2921 frame:3 start:24 end:8786 gi	hemocyanin 1-like OS=Octopus vulgaris OX=6645 GN=LOC115212215 PE=4 SV=2 hemocyanin G-type, units Oda to Odg OS=Octopus vulgaris OX=6645 GN=LOC115211670 PE=4 SV=2 16596797 gb|AAK28276.2| hemocyanin G-type [Enteroctopus dofleini]	A0A6P7SER3; Cluster-58773.162316;orf1 len=2526 frame:3 start:24 end:7601 gi; A0A6P7SDC4; Cluster-58773.162319;orf1 len=2921 frame:3 start:24 end:8786 gi	hemocyanin 1-like OS=Octopus vulgaris OX=6645 GN=LOC115212215 PE=4 SV=2; 16596797 gb|AAK28276.2| hemocyanin G-type [Enteroctopus dofleini]; hemocyanin G-type, units Oda to Odg OS=Octopus vulgaris OX=6645 GN=LOC115211670 PE=4 SV=2; 16596797 gb|AAK28276.2| hemocyanin G-type [Enteroctopus dofleini]	0	2	2	0.6893	0	1	1	1	1264.12	2527.23	2527.23	0.95	0.00119	0/0	0	0	441668	HCD (High Energy Collision Dissociation)	MS2	0	88.729	65.2022	12334	12334	12329	MCMMCM34021206.raw	F6	1280	5.31	3	0.0001881	1.19x10⁻¹⁰	3.737
High	Sequest HT	Sequest HT (A2)	A	2	Unambiguous	LWAVWQALQIHR	LWAVWQALQIHR		5	A0A6P7SER3; Q9BJ58; A0A6P7SDC4; Cluster-58773.162319;orf1 len=2921 frame:3 start:24 end:8786 gi	hemocyanin 1-like OS=Octopus vulgaris OX=6645 GN=LOC115212215 PE=4 SV=2 Hemocyanin G-type (Fragment) OS=Enteroctopus dofleini OX=267067 PE=4 SV=2 hemocyanin G-type, units Oda to Odg OS=Octopus vulgaris OX=6645 GN=LOC115211670 PE=4 SV=2 16596797 gb|AAK28276.2| hemocyanin G-type [Enteroctopus dofleini]	A0A6P7SER3; Cluster-58773.162316;orf1 len=2526 frame:3 start:24 end:7601 gi; Q9BJ58; A0A6P7SDC4; Cluster-58773.162319;orf1 len=2921 frame:3 start:24 end:8786 gi	hemocyanin 1-like OS=Octopus vulgaris OX=6645 GN=LOC115212215 PE=4 SV=2; 16596797 gb|AAK28276.2| hemocyanin G-type [Enteroctopus dofleini]; Hemocyanin G-type (Fragment) OS=Enteroctopus dofleini OX=267067 PE=4 SV=2; hemocyanin G-type, units Oda to Odg OS=Octopus vulgaris OX=6645 GN=LOC115211670 PE=4 SV=2; 16596797 gb|AAK28276.2| hemocyanin G-type [Enteroctopus dofleini]	0	2	2	0.5801	0	1	1	1	760.928	1520.85	1520.85	-0.34	-0.00026	0/0	0	0	281416	HCD (High Energy Collision Dissociation)	MS2	48.9545	100	66.1858	12523	12523	12516	MCMMCM34021206.raw	F6	838	3.31	4	0.0001881	2.86x10⁻⁶	2.018
High	Sequest HT	Sequest HT (A2)	A	2	Unambiguous	IINENLVVNTAFFR	IINENLVVNTAFFR		2	Cluster-58773.111440;orf1 len=8936 frame:1 start:91 end:26898 gi	762095998 ref|XP_011430516.1| PREDICTED: uncharacterized protein LOC105330502 [Crassostrea gigas]	Cluster-58773.111441;orf2 len=4893 frame:3 start:9447 end:24125 gi; Cluster-58773.111440;orf1 len=8936 frame:1 start:91 end:26898 gi	762095998 ref|XP_011430516.1| PREDICTED: uncharacterized protein LOC105330502 [Crassostrea gigas]; 762095998 ref|XP_011430516.1| PREDICTED: uncharacterized protein LOC105330502 [Crassostrea gigas]	0	2	2	0.4516	0	1	1	1	825.455	1649.9	1649.9	1.09	0.0009	0/0	0	0	127720	HCD (High Energy Collision Dissociation)	MS2	11.6441	100	66.143	12515	12515	12505	MCMMCM34021206.raw	F6	965	1.86	1	0.0001881	1.10x10⁻²	0.609
High	Sequest HT	Sequest HT (A2)	A	2	Unambiguous	AGEFYVLGSANEMPWKFDR	AGEFYVLGSANEMPWKFDR		4	A0A6P7SER3; A0A6P7SDC4; Cluster-58773.162319;orf1 len=2921 frame:3 start:24 end:8786 gi	hemocyanin 1-like OS=Octopus vulgaris OX=6645 GN=LOC115212215 PE=4 SV=2 hemocyanin G-type, units Oda to Odg OS=Octopus vulgaris OX=6645 GN=LOC115211670 PE=4 SV=2 16596797 gb|AAK28276.2| hemocyanin G-type [Enteroctopus dofleini]	A0A6P7SER3; Cluster-58773.162316;orf1 len=2526 frame:3 start:24 end:7601 gi; A0A6P7SDC4; Cluster-58773.162319;orf1 len=2921 frame:3 start:24 end:8786 gi	hemocyanin 1-like OS=Octopus vulgaris OX=6645 GN=LOC115212215 PE=4 SV=2; 16596797 gb|AAK28276.2| hemocyanin G-type [Enteroctopus dofleini]; hemocyanin G-type, units Oda to Odg OS=Octopus vulgaris OX=6645 GN=LOC115211670 PE=4 SV=2; 16596797 gb|AAK28276.2| hemocyanin G-type [Enteroctopus dofleini]	1	3	3	0.689	0	1	1	1	739.685	2217.04	2217.04	-1.02	-0.00075	0/0	0	0	517087	HCD (High Energy Collision Dissociation)	MS2	20.7714	55.224	66.0711	12501	12501	12494	MCMMCM34021206.raw	F6	1060	5.82	3	0.0001881	3.25x10⁻⁸	2.781
High	Sequest HT	Sequest HT (A2)	A	2	Unambiguous	LWAIWQALQEHR	LWAIWQALQEHR		8	A0A6P7SER3; Q9BJ58; O61363; A0A6P7SDC4; Q5XLV2; Cluster-58773.162319;orf1 len=2921 frame:3 start:24 end:8786 gi	hemocyanin 1-like OS=Octopus vulgaris OX=6645 GN=LOC115212215 PE=4 SV=2 Hemocyanin G-type (Fragment) OS=Enteroctopus dofleini OX=267067 PE=4 SV=2 Hemocyanin G-type, units Oda to Odg OS=Enteroctopus dofleini OX=267067 GN=ODHCY PE=1 SV=1 hemocyanin G-type, units Oda to Odg OS=Octopus vulgaris OX=6645 GN=LOC115211670 PE=4 SV=2 Hemocyanin A-type (Fragment) OS=Enteroctopus dofleini OX=267067 GN=HA PE=…	A0A6P7SER3; Cluster-58773.162316;orf1 len=2526 frame:3 start:24 end:7601 gi; Q9BJ58; O61363; A0A6P7SDC4; P12659; Q5XLV2; Cluster-58773.162319;orf1 len=2921 frame:3 start:24 end:8786 gi	hemocyanin 1-like OS=Octopus vulgaris OX=6645 GN=LOC115212215 PE=4 SV=2; 16596797 gb|AAK28276.2| hemocyanin G-type [Enteroctopus dofleini]; Hemocyanin G-type (Fragment) OS=Enteroctopus dofleini OX=267067 PE=4 SV=2; Hemocyanin G-type, units Oda to Odg OS=Enteroctopus dofleini OX=267067 GN=ODHCY PE=1 SV=1; hemocyanin G-type, units Oda to Odg OS=Octopus vulgaris OX=6645 GN=LOC115211670 PE=4 SV=2; He…	0	2	2	0.5581	0	1	1	1	775.915	1550.82	1550.82	0	0	0/0	0	0	914052	HCD (High Energy Collision Dissociation)	MS2	20.3956	72.363	66.0591	12498	12498	12494	MCMMCM34021206.raw	F6	1305	3.53	6	0.0001881	2.88x10⁻⁵	1.624
High	Sequest HT	Sequest HT (A2)	A	2	Unambiguous	LWAIWQALQEHR	LWAIWQALQEHR		8	A0A6P7SER3; Q9BJ58; O61363; A0A6P7SDC4; Q5XLV2; Cluster-58773.162319;orf1 len=2921 frame:3 start:24 end:8786 gi	hemocyanin 1-like OS=Octopus vulgaris OX=6645 GN=LOC115212215 PE=4 SV=2 Hemocyanin G-type (Fragment) OS=Enteroctopus dofleini OX=267067 PE=4 SV=2 Hemocyanin G-type, units Oda to Odg OS=Enteroctopus dofleini OX=267067 GN=ODHCY PE=1 SV=1 hemocyanin G-type, units Oda to Odg OS=Octopus vulgaris OX=6645 GN=LOC115211670 PE=4 SV=2 Hemocyanin A-type (Fragment) OS=Enteroctopus dofleini OX=267067 GN=HA PE=…	A0A6P7SER3; Cluster-58773.162316;orf1 len=2526 frame:3 start:24 end:7601 gi; Q9BJ58; O61363; A0A6P7SDC4; P12659; Q5XLV2; Cluster-58773.162319;orf1 len=2921 frame:3 start:24 end:8786 gi	hemocyanin 1-like OS=Octopus vulgaris OX=6645 GN=LOC115212215 PE=4 SV=2; 16596797 gb|AAK28276.2| hemocyanin G-type [Enteroctopus dofleini]; Hemocyanin G-type (Fragment) OS=Enteroctopus dofleini OX=267067 PE=4 SV=2; Hemocyanin G-type, units Oda to Odg OS=Enteroctopus dofleini OX=267067 GN=ODHCY PE=1 SV=1; hemocyanin G-type, units Oda to Odg OS=Octopus vulgaris OX=6645 GN=LOC115211670 PE=4 SV=2; He…	0	3	3	0.5061	0	1	1	1	517.612	1550.82	1550.82	-0.84	-0.00044	0/0	0	0	1309083	HCD (High Energy Collision Dissociation)	MS2	0	33.713	65.9978	12485	12485	12483	MCMMCM34021206.raw	F6	1393	4.11	6	0.0001881	1.34x10⁻⁵	1.755
High	Sequest HT	Sequest HT (A2)	A	2	Unambiguous	NAATEDLWDALESASGKPIK	NAATEDLWDALESASGKPIK		4	A0A6P7TEW0	Aminopeptidase OS=Octopus vulgaris OX=6645 GN=LOC115223377 PE=3 SV=1	A0A6P7TEW0; Cluster-58773.88131;orf1 len=838 frame:1 start:325 end:2838 gi; Cluster-58773.88135;orf1 len=833 frame:1 start:325 end:2823 gi; Cluster-58773.88130;orf1 len=870 frame:3 start:327 end:2936 gi	Aminopeptidase OS=Octopus vulgaris OX=6645 GN=LOC115223377 PE=3 SV=1; 762145751 ref|XP_011456155.1| PREDICTED: puromycin-sensitive aminopeptidase-like [Crassostrea gigas]; 762145751 ref|XP_011456155.1| PREDICTED: puromycin-sensitive aminopeptidase-like [Crassostrea gigas]; 762145751 ref|XP_011456155.1| PREDICTED: puromycin-sensitive aminopeptidase-like [Crassostrea gigas]	0	3	3	0.6601	0	1	1	1	706.024	2116.06	2116.06	0.81	0.00057	0/0	0	0	365816	HCD (High Energy Collision Dissociation)	MS2	34.8544	100	65.9611	12479	12479	12472	MCMMCM34021206.raw	F6	1488	4.06	1	0.0001881	9.69x10⁻⁸	2.595
High	Sequest HT	Sequest HT (A2)	A	2	Unambiguous	AYCALEQLSFPMKPFSWETNPNLHTR	AYcALEQLSFPMKPFSWETNPNLHTR	C3(Carbamidomethyl)	4	A0A6P7SER3; A0A6P7SDC4; Cluster-58773.162319;orf1 len=2921 frame:3 start:24 end:8786 gi	hemocyanin 1-like OS=Octopus vulgaris OX=6645 GN=LOC115212215 PE=4 SV=2 hemocyanin G-type, units Oda to Odg OS=Octopus vulgaris OX=6645 GN=LOC115211670 PE=4 SV=2 16596797 gb|AAK28276.2| hemocyanin G-type [Enteroctopus dofleini]	A0A6P7SER3; Cluster-58773.162316;orf1 len=2526 frame:3 start:24 end:7601 gi; A0A6P7SDC4; Cluster-58773.162319;orf1 len=2921 frame:3 start:24 end:8786 gi	hemocyanin 1-like OS=Octopus vulgaris OX=6645 GN=LOC115212215 PE=4 SV=2; 16596797 gb|AAK28276.2| hemocyanin G-type [Enteroctopus dofleini]; hemocyanin G-type, units Oda to Odg OS=Octopus vulgaris OX=6645 GN=LOC115211670 PE=4 SV=2; 16596797 gb|AAK28276.2| hemocyanin G-type [Enteroctopus dofleini]	0	3	3	0.3159	0	1	1	1	1046.5	3137.5	3137.5	0.93	0.00097	0/0	0	0	1.88503e+06	HCD (High Energy Collision Dissociation)	MS2	0	12.83	65.9417	12474	12474	12472	MCMMCM34021206.raw	F6	1098	4.4	3	0.0001881	4.12x10⁻⁷	2.348
High	Sequest HT	Sequest HT (A2)	A	2	Unambiguous	AYCALEQLSFPMKPFSWETNPNLHTR	AYcALEQLSFPMKPFSWETNPNLHTR	C3(Carbamidomethyl)	4	A0A6P7SER3; A0A6P7SDC4; Cluster-58773.162319;orf1 len=2921 frame:3 start:24 end:8786 gi	hemocyanin 1-like OS=Octopus vulgaris OX=6645 GN=LOC115212215 PE=4 SV=2 hemocyanin G-type, units Oda to Odg OS=Octopus vulgaris OX=6645 GN=LOC115211670 PE=4 SV=2 16596797 gb|AAK28276.2| hemocyanin G-type [Enteroctopus dofleini]	A0A6P7SER3; Cluster-58773.162316;orf1 len=2526 frame:3 start:24 end:7601 gi; A0A6P7SDC4; Cluster-58773.162319;orf1 len=2921 frame:3 start:24 end:8786 gi	hemocyanin 1-like OS=Octopus vulgaris OX=6645 GN=LOC115212215 PE=4 SV=2; 16596797 gb|AAK28276.2| hemocyanin G-type [Enteroctopus dofleini]; hemocyanin G-type, units Oda to Odg OS=Octopus vulgaris OX=6645 GN=LOC115211670 PE=4 SV=2; 16596797 gb|AAK28276.2| hemocyanin G-type [Enteroctopus dofleini]	0	4	4	0.3405	0	1	1	1	785.131	3137.5	3137.5	1.65	0.00129	0/0	0	0	12606664	HCD (High Energy Collision Dissociation)	MS2	0.125152	1.745	65.939	12473	12473	12472	MCMMCM34021206.raw	F6	1113	4.17	3	0.0001881	1.78x10⁻⁶	2.099
High	Sequest HT	Sequest HT (A2)	A	2	Unambiguous	TYSFVLPNVTLR	TYSFVLPNVTLR		7	Cluster-58773.112557;orf1 len=619 frame:3 start:147 end:2003 gi	266616 sp|Q01240.1|NF60_DORPE RecName: Full=60 kDa neurofilament protein; Short=NF60 [Doryteuthis pealeii]>gi|161294|gb|AAA29992.1| 60 kDa neurofilament protein [Doryteuthis pealeii]	A0A0L8G4V5; Cluster-58773.112556;orf1 len=583 frame:-3 start:1913 end:165 gi; Cluster-58773.28775;orf1 len=111 frame:-3 start:912 end:580 gi; Cluster-58773.112555;orf1 len=87 frame:3 start:315 end:575 gi; Cluster-58773.112557;orf1 len=619 frame:3 start:147 end:2003 gi; Cluster-58773.112559;orf1 len=211 frame:1 start:1147 end:1779 gi; Cluster-58773.65235;orf1 len=111 frame:3 start:3 end:335 gi	LTD domain-containing protein (Fragment) OS=Octopus bimaculoides OX=37653 GN=OCBIM_22000069mg PE=4 SV=1; 266616 sp|Q01240.1|NF60_DORPE RecName: Full=60 kDa neurofilament protein; Short=NF60 [Doryteuthis pealeii]>gi|161294|gb|AAA29992.1| 60 kDa neurofilament protein [Doryteuthis pealeii]; 762121296 ref|XP_011443571.1| PREDICTED: 70 kDa neurofilament protein-like [Crassostrea gigas]>gi|762121298|re…	0	2	2	0.5495	0	1	1	1	705.394	1409.78	1409.78	1.91	0.00135	0/0	0	0	193479	HCD (High Energy Collision Dissociation)	MS2	30.7272	100	65.9145	12470	12470	12461	MCMMCM34021206.raw	F6	877	2.02	1	0.0001881	1.75x10⁻³	0.924
High	Sequest HT	Sequest HT (A2)	A	2	Unambiguous	LWAVWQALQIHR	LWAVWQALQIHR		5	A0A6P7SER3; Q9BJ58; A0A6P7SDC4; Cluster-58773.162319;orf1 len=2921 frame:3 start:24 end:8786 gi	hemocyanin 1-like OS=Octopus vulgaris OX=6645 GN=LOC115212215 PE=4 SV=2 Hemocyanin G-type (Fragment) OS=Enteroctopus dofleini OX=267067 PE=4 SV=2 hemocyanin G-type, units Oda to Odg OS=Octopus vulgaris OX=6645 GN=LOC115211670 PE=4 SV=2 16596797 gb|AAK28276.2| hemocyanin G-type [Enteroctopus dofleini]	A0A6P7SER3; Cluster-58773.162316;orf1 len=2526 frame:3 start:24 end:7601 gi; Q9BJ58; A0A6P7SDC4; Cluster-58773.162319;orf1 len=2921 frame:3 start:24 end:8786 gi	hemocyanin 1-like OS=Octopus vulgaris OX=6645 GN=LOC115212215 PE=4 SV=2; 16596797 gb|AAK28276.2| hemocyanin G-type [Enteroctopus dofleini]; Hemocyanin G-type (Fragment) OS=Enteroctopus dofleini OX=267067 PE=4 SV=2; hemocyanin G-type, units Oda to Odg OS=Octopus vulgaris OX=6645 GN=LOC115211670 PE=4 SV=2; 16596797 gb|AAK28276.2| hemocyanin G-type [Enteroctopus dofleini]	0	3	3	0.5426	0	1	1	1	507.621	1520.85	1520.85	0.33	0.00017	0/0	0	0	2.33527e+06	HCD (High Energy Collision Dissociation)	MS2	0.745404	17.554	66.1627	12517	12517	12516	MCMMCM34021206.raw	F6	754	3.87	4	0.0001881	9.14x10⁻⁵	1.427
High	Sequest HT	Sequest HT (A2)	A	2	Unambiguous	SIDGYQALAEFHGLPAK	SIDGYQALAEFHGLPAK		10	A0A0L8GNM6; A0A6P7SER3; Q9BJ58; O61363; A0A6P7SDC4; Q5XLV2; Cluster-58773.162319;orf1 len=2921 frame:3 start:24 end:8786 gi	Uncharacterized protein OS=Octopus bimaculoides OX=37653 GN=OCBIM_22031096mg PE=4 SV=1 hemocyanin 1-like OS=Octopus vulgaris OX=6645 GN=LOC115212215 PE=4 SV=2 Hemocyanin G-type (Fragment) OS=Enteroctopus dofleini OX=267067 PE=4 SV=2 Hemocyanin G-type, units Oda to Odg OS=Enteroctopus dofleini OX=267067 GN=ODHCY PE=1 SV=1 hemocyanin G-type, units Oda to Odg OS=Octopus vulgaris OX=6645 GN=LOC115211…	A0A1Q2SJF4; A0A0L8GNM6; A0A6P7SER3; Cluster-58773.162316;orf1 len=2526 frame:3 start:24 end:7601 gi; Q9BJ58; O61363; A0A6P7SDC4; Cluster-58773.162317;orf1 len=187 frame:-3 start:561 end:1 gi; Q5XLV2; Cluster-58773.162319;orf1 len=2921 frame:3 start:24 end:8786 gi	Hemocyanin-like protein (Fragment) OS=Uroteuthis edulis OX=55720 GN=hc PE=2 SV=1; Uncharacterized protein OS=Octopus bimaculoides OX=37653 GN=OCBIM_22031096mg PE=4 SV=1; hemocyanin 1-like OS=Octopus vulgaris OX=6645 GN=LOC115212215 PE=4 SV=2; 16596797 gb|AAK28276.2| hemocyanin G-type [Enteroctopus dofleini]; Hemocyanin G-type (Fragment) OS=Enteroctopus dofleini OX=267067 PE=4 SV=2; Hemocyanin G-t…	0	3	3	0.3353	0	1	1	1	606.312	1816.92	1816.92	-0.75	-0.00046	0/0	0	0	395865	HCD (High Energy Collision Dissociation)	MS2	54.9377	100	65.1446	12323	12323	12318	MCMMCM34021206.raw	F6	1447	1.67	7	0.0001881	1.25x10⁻⁵	1.766
High	Sequest HT	Sequest HT (A2)	A	2	Unambiguous	SSDGFEAIASFHALPPLCPNPTAK	SSDGFEAIASFHALPPLcPNPTAK	C18(Carbamidomethyl)	4	A0A6P7SER3; A0A6P7SDC4; Cluster-58773.162319;orf1 len=2921 frame:3 start:24 end:8786 gi	hemocyanin 1-like OS=Octopus vulgaris OX=6645 GN=LOC115212215 PE=4 SV=2 hemocyanin G-type, units Oda to Odg OS=Octopus vulgaris OX=6645 GN=LOC115211670 PE=4 SV=2 16596797 gb|AAK28276.2| hemocyanin G-type [Enteroctopus dofleini]	A0A6P7SER3; Cluster-58773.162316;orf1 len=2526 frame:3 start:24 end:7601 gi; A0A6P7SDC4; Cluster-58773.162319;orf1 len=2921 frame:3 start:24 end:8786 gi	hemocyanin 1-like OS=Octopus vulgaris OX=6645 GN=LOC115212215 PE=4 SV=2; 16596797 gb|AAK28276.2| hemocyanin G-type [Enteroctopus dofleini]; hemocyanin G-type, units Oda to Odg OS=Octopus vulgaris OX=6645 GN=LOC115211670 PE=4 SV=2; 16596797 gb|AAK28276.2| hemocyanin G-type [Enteroctopus dofleini]	0	3	3	0.4444	0	1	1	1	843.079	2527.22	2527.23	-1.99	-0.00168	0/0	0	0	681286	HCD (High Energy Collision Dissociation)	MS2	19.0456	44.086	65.1274	12319	12319	12318	MCMMCM34021206.raw	F6	1282	3.33	3	0.0001881	4.30x10⁻⁴	1.164
High	Sequest HT	Sequest HT (A2)	A	2	Unambiguous	ETTTLTIPNDIILDTK	ETTTLTIPNDIILDTK		3	A0A6P7S417	chloride intracellular channel exc-4 OS=Octopus vulgaris OX=6645 GN=LOC115208761 PE=4 SV=1	Cluster-58773.137116;orf1 len=175 frame:1 start:1 end:525 gi; Cluster-58773.137115;orf1 len=133 frame:1 start:619 end:1017 gi; A0A6P7S417	871209549 ref|XP_012942275.1| PREDICTED: chloride intracellular channel protein 5-like [Aplysia californica]; 871209549 ref|XP_012942275.1| PREDICTED: chloride intracellular channel protein 5-like [Aplysia californica]; chloride intracellular channel exc-4 OS=Octopus vulgaris OX=6645 GN=LOC115208761 PE=4 SV=1	0	2	2	0.5419	0	1	1	1	894.486	1787.97	1787.96	0.88	0.00079	0/0	0	0	360068	HCD (High Energy Collision Dissociation)	MS2	28.0912	100	64.9028	12278	12278	12274	MCMMCM34021206.raw	F6	1090	2.27	1	0.0001881	4.72x10⁻³	0.754
High	Sequest HT	Sequest HT (A2)	A	2	Unambiguous	FVELTLPPELK	FVELTLPPELK		3	A0A6P7SI10; Cluster-58773.163438;orf1 len=994 frame:2 start:254 end:3235 gi	CD109 antigen isoform X2 OS=Octopus vulgaris OX=6645 GN=LOC115213260 PE=4 SV=1 410935705 gb|AFV94409.1| thioester-containing protein 1 [Euprymna scolopes]	A0A6P7SI10; A0A7E6F3R1; Cluster-58773.163438;orf1 len=994 frame:2 start:254 end:3235 gi	CD109 antigen isoform X2 OS=Octopus vulgaris OX=6645 GN=LOC115213260 PE=4 SV=1; CD109 antigen isoform X1 OS=Octopus vulgaris OX=6645 GN=LOC115213260 PE=4 SV=1; 410935705 gb|AFV94409.1| thioester-containing protein 1 [Euprymna scolopes]	0	2	2	0.4246	0	1	1	1	643.374	1285.74	1285.74	0.29	0.00019	0/0	0	0	243502	HCD (High Energy Collision Dissociation)	MS2	44.766	100	63.8815	12082	12082	12076	MCMMCM34021206.raw	F6	879	1.79	2	0.0001881	7.59x10⁻⁴	1.067
High	Sequest HT	Sequest HT (A2)	A	2	Unambiguous	AFDYHELGYDYDNLNFHGMTIPELEEHLK	AFDYHELGYDYDNLNFHGmTIPELEEHLK	M19(Oxidation)	3	A0A6P7SER3; A0A6P7SDC4; Cluster-58773.162319;orf1 len=2921 frame:3 start:24 end:8786 gi	hemocyanin 1-like OS=Octopus vulgaris OX=6645 GN=LOC115212215 PE=4 SV=2 hemocyanin G-type, units Oda to Odg OS=Octopus vulgaris OX=6645 GN=LOC115211670 PE=4 SV=2 16596797 gb|AAK28276.2| hemocyanin G-type [Enteroctopus dofleini]	A0A6P7SER3; A0A6P7SDC4; Cluster-58773.162319;orf1 len=2921 frame:3 start:24 end:8786 gi	hemocyanin 1-like OS=Octopus vulgaris OX=6645 GN=LOC115212215 PE=4 SV=2; hemocyanin G-type, units Oda to Odg OS=Octopus vulgaris OX=6645 GN=LOC115211670 PE=4 SV=2; 16596797 gb|AAK28276.2| hemocyanin G-type [Enteroctopus dofleini]	0	4	4	0.5522	0	1	1	1	882.405	3526.6	3526.59	2.35	0.00207	0/0	0	0	99392	HCD (High Energy Collision Dissociation)	MS2	7.55668	100	63.8629	12078	12078	12076	MCMMCM34021206.raw	F6	581	4.02	3	0.0001881	2.20x10⁻⁶	2.063
High	Sequest HT	Sequest HT (A2)	A	2	Unambiguous	AFDYHELGYDYDNLNFHGMTIPELEEHLK	AFDYHELGYDYDNLNFHGmTIPELEEHLK	M19(Oxidation)	3	A0A6P7SER3; A0A6P7SDC4; Cluster-58773.162319;orf1 len=2921 frame:3 start:24 end:8786 gi	hemocyanin 1-like OS=Octopus vulgaris OX=6645 GN=LOC115212215 PE=4 SV=2 hemocyanin G-type, units Oda to Odg OS=Octopus vulgaris OX=6645 GN=LOC115211670 PE=4 SV=2 16596797 gb|AAK28276.2| hemocyanin G-type [Enteroctopus dofleini]	A0A6P7SER3; A0A6P7SDC4; Cluster-58773.162319;orf1 len=2921 frame:3 start:24 end:8786 gi	hemocyanin 1-like OS=Octopus vulgaris OX=6645 GN=LOC115212215 PE=4 SV=2; hemocyanin G-type, units Oda to Odg OS=Octopus vulgaris OX=6645 GN=LOC115211670 PE=4 SV=2; 16596797 gb|AAK28276.2| hemocyanin G-type [Enteroctopus dofleini]	0	5	5	0.4132	0	1	1	1	706.125	3526.6	3526.59	1.66	0.00117	0/0	0	0	284286	HCD (High Energy Collision Dissociation)	MS2	24.4404	39.371	63.8594	12077	12077	12076	MCMMCM34021206.raw	F6	566	4.38	3	0.0001881	2.46x10⁻⁴	1.258
High	Sequest HT	Sequest HT (A2)	A	2	Unambiguous	NIKPELFQYLSSLK	NIKPELFQYLSSLK		7	A0A6P7TJS2	insulin-like growth factor-binding protein complex acid labile subunit isoform X1 OS=Octopus vulgaris OX=6645 GN=LOC115225305 PE=4 SV=1	A0A7E6FQN6; A0A7E6FQ69; A0A6P7TJS2; A0A7E6FQN1; A0A7E6FSM9; A0A7E6FQI0; A0A7E6FQL1	insulin-like growth factor-binding protein complex acid labile subunit isoform X7 OS=Octopus vulgaris OX=6645 GN=LOC115225305 PE=4 SV=1; slit homolog 1 protein isoform X4 OS=Octopus vulgaris OX=6645 GN=LOC115225305 PE=4 SV=1; insulin-like growth factor-binding protein complex acid labile subunit isoform X1 OS=Octopus vulgaris OX=6645 GN=LOC115225305 PE=4 SV=1; leucine-rich repeat-containing G-pro…	0	3	3	0.4013	0	1	1	1	560.649	1679.93	1679.94	-2.2	-0.00123	0/0	0	0	202873	HCD (High Energy Collision Dissociation)	MS2	9.69789	100	63.8403	12075	12075	12065	MCMMCM34021206.raw	F6	762	3.09	1	0.0001881	3.45x10⁻⁴	1.201
High	Sequest HT	Sequest HT (A2)	A	2	Unambiguous	SNEQELVTFDISLK	SNEQELVTFDISLK		4	A0A6P7SI10; Cluster-58773.163438;orf1 len=994 frame:2 start:254 end:3235 gi	CD109 antigen isoform X2 OS=Octopus vulgaris OX=6645 GN=LOC115213260 PE=4 SV=1 410935705 gb|AFV94409.1| thioester-containing protein 1 [Euprymna scolopes]	A0A6P7SI10; A0A7E6F3R1; Cluster-58773.163438;orf1 len=994 frame:2 start:254 end:3235 gi; Cluster-58773.160937;orf1 len=552 frame:-3 start:1658 end:3 gi	CD109 antigen isoform X2 OS=Octopus vulgaris OX=6645 GN=LOC115213260 PE=4 SV=1; CD109 antigen isoform X1 OS=Octopus vulgaris OX=6645 GN=LOC115213260 PE=4 SV=1; 410935705 gb|AFV94409.1| thioester-containing protein 1 [Euprymna scolopes]; 410935705 gb|AFV94409.1| thioester-containing protein 1 [Euprymna scolopes]	0	2	2	0.6433	0	1	1	1	811.919	1622.83	1622.83	2.48	0.00201	0/0	0	0	345689	HCD (High Energy Collision Dissociation)	MS2	27.4095	100	63.8173	12070	12070	12065	MCMMCM34021206.raw	F6	1484	3.28	2	0.0001881	9.95x10⁻⁶	1.805
High	Sequest HT	Sequest HT (A2)	A	2	Unambiguous	QTQTFTTYSDNQPGVLIQVYEGER	QTQTFTTYSDNQPGVLIQVYEGER		13	A0A812CBL4; A0A6P7T7L0	HSPA1s OS=Sepia pharaonis OX=158019 GN=SPHA_33061 PE=3 SV=1 heat shock cognate 71 kDa protein OS=Octopus vulgaris OX=6645 GN=LOC115220772 PE=3 SV=1	A0A812CBL4; A0A0K0M7D7; A0A6P7T7L0; Cluster-58773.161631;orf1 len=298 frame:-3 start:894 end:1 gi; Cluster-58773.161225;orf1 len=627 frame:-3 start:1882 end:2 gi; A0A075IT96; A0A6P7T7E6; Cluster-1654.2;orf2 len=470 frame:3 start:3 end:1412 gi; Cluster-58773.161228;orf2 len=469 frame:2 start:836 end:2242 gi; A0A0L8IA52; A0A0L8G3E9; Cluster-58773.161224;orf1 len=685 frame:1 start:1 end:2055 gi; Clu…	HSPA1s OS=Sepia pharaonis OX=158019 GN=SPHA_33061 PE=3 SV=1; Heat shock protein 70 OS=Octopus tankahkeei OX=794816 GN=hsp70 PE=2 SV=1; heat shock cognate 71 kDa protein OS=Octopus vulgaris OX=6645 GN=LOC115220772 PE=3 SV=1; 116282655 gb|ABJ97377.1| heat shock protein 70 [Pteria penguin]; 664646494 gb|AIF32626.1| heat shock protein 70 [Sepiella maindroni]; Heat shock protein 70 OS=Sepiella maindro…	0	3	3	0.536	0	1	1	1	925.444	2774.32	2774.33	-3.54	-0.00327	0/0	0	0	109676	HCD (High Energy Collision Dissociation)	MS2	7.26324	100	63.7774	12063	12063	12054	MCMMCM34021206.raw	F6	1132	2.22	2	0.0001881	1.50x10⁻²	0.555
High	Sequest HT	Sequest HT (A2)	A	2	Unambiguous	AFDYHELGYDYDNLNFHGMTIPELEEHLK	AFDYHELGYDYDNLNFHGmTIPELEEHLK	M19(Oxidation)	3	A0A6P7SER3; A0A6P7SDC4; Cluster-58773.162319;orf1 len=2921 frame:3 start:24 end:8786 gi	hemocyanin 1-like OS=Octopus vulgaris OX=6645 GN=LOC115212215 PE=4 SV=2 hemocyanin G-type, units Oda to Odg OS=Octopus vulgaris OX=6645 GN=LOC115211670 PE=4 SV=2 16596797 gb|AAK28276.2| hemocyanin G-type [Enteroctopus dofleini]	A0A6P7SER3; A0A6P7SDC4; Cluster-58773.162319;orf1 len=2921 frame:3 start:24 end:8786 gi	hemocyanin 1-like OS=Octopus vulgaris OX=6645 GN=LOC115212215 PE=4 SV=2; hemocyanin G-type, units Oda to Odg OS=Octopus vulgaris OX=6645 GN=LOC115211670 PE=4 SV=2; 16596797 gb|AAK28276.2| hemocyanin G-type [Enteroctopus dofleini]	0	4	4	0.6534	0	1	1	1	882.405	3526.6	3526.59	2.2	0.00194	0/0	0	0	43702.8	HCD (High Energy Collision Dissociation)	MS2	33.6425	100	63.7589	12059	12059	12054	MCMMCM34021206.raw	F6	568	3.78	3	0.0001881	1.04x10⁻⁵	1.798
High	Sequest HT	Sequest HT (A2)	A	2	Unambiguous	NKDPVTFEDLVEGFK	NKDPVTFEDLVEGFK		6	A0A6P7SU30	myosin-2 essential light chain isoform X2 OS=Octopus vulgaris OX=6645 GN=LOC115216469 PE=4 SV=1	Cluster-58773.186489;orf1 len=185 frame:2 start:218 end:772 gi; Cluster-58773.186488;orf1 len=168 frame:2 start:218 end:721 gi; Cluster-58773.186487;orf1 len=182 frame:2 start:218 end:763 gi; A0A0L8HS39; A0A6P7SU30; A0A6P7STT8	405972312 gb|EKC37087.1| Myosin-2 essential light chain [Crassostrea gigas]; 405972312 gb|EKC37087.1| Myosin-2 essential light chain [Crassostrea gigas]; 405972312 gb|EKC37087.1| Myosin-2 essential light chain [Crassostrea gigas]; Uncharacterized protein OS=Octopus bimaculoides OX=37653 GN=OCBIM_22007563mg PE=4 SV=1; myosin-2 essential light chain isoform X2 OS=Octopus vulgaris OX=6645 GN=LOC1152…	1	3	3	0.5945	0	1	1	1	579.961	1737.87	1737.87	-0.91	-0.00053	0/0	0	0	564425	HCD (High Energy Collision Dissociation)	MS2	6.83239	73.087	63.7549	12058	12058	12054	MCMMCM34021206.raw	F6	1501	4.39	1	0.0001881	2.39x10⁻⁵	1.656
High	Sequest HT	Sequest HT (A2)	A	2	Unambiguous	EETYLDENGEAHPNPFFSGVIDEAGAQTTR	EETYLDENGEAHPNPFFSGVIDEAGAQTTR		4	A0A6P7SER3; A0A6P7SDC4; Cluster-58773.162319;orf1 len=2921 frame:3 start:24 end:8786 gi	hemocyanin 1-like OS=Octopus vulgaris OX=6645 GN=LOC115212215 PE=4 SV=2 hemocyanin G-type, units Oda to Odg OS=Octopus vulgaris OX=6645 GN=LOC115211670 PE=4 SV=2 16596797 gb|AAK28276.2| hemocyanin G-type [Enteroctopus dofleini]	A0A6P7SER3; Cluster-58773.162316;orf1 len=2526 frame:3 start:24 end:7601 gi; A0A6P7SDC4; Cluster-58773.162319;orf1 len=2921 frame:3 start:24 end:8786 gi	hemocyanin 1-like OS=Octopus vulgaris OX=6645 GN=LOC115212215 PE=4 SV=2; 16596797 gb|AAK28276.2| hemocyanin G-type [Enteroctopus dofleini]; hemocyanin G-type, units Oda to Odg OS=Octopus vulgaris OX=6645 GN=LOC115211670 PE=4 SV=2; 16596797 gb|AAK28276.2| hemocyanin G-type [Enteroctopus dofleini]	0	3	3	0.6529	0	1	1	1	1098.83	3294.48	3294.48	-0.06	-7e-05	0/0	0	0	207336	HCD (High Energy Collision Dissociation)	MS2	0	85.118	63.9874	12102	12102	12098	MCMMCM34021206.raw	F6	578	4.84	3	0.0001881	2.12x10⁻⁹	3.246
High	Sequest HT	Sequest HT (A2)	A	2	Unambiguous	FDLTGGFLSK	FDLTGGFLSK		1	A0A7E6FGH2	peroxidase-like protein OS=Octopus vulgaris OX=6645 GN=LOC115221592 PE=4 SV=1	A0A7E6FGH2	peroxidase-like protein OS=Octopus vulgaris OX=6645 GN=LOC115221592 PE=4 SV=1	0	2	2	0.5309	0	1	1	1	542.787	1084.57	1084.57	-1.43	-0.00078	0/0	0	0	664899	HCD (High Energy Collision Dissociation)	MS2	3.55609	93.551	63.7504	12057	12057	12054	MCMMCM34021206.raw	F6	986	3.24	1	0.0001881	5.73x10⁻⁴	1.115
High	Sequest HT	Sequest HT (A2)	A	2	Unambiguous	TSANVDITVDSAGNTYNAGSITILGGSK	TSANVDITVDSAGNTYNAGSITILGGSK		4	A0A6P7SER3; A0A6P7SDC4; Cluster-58773.162319;orf1 len=2921 frame:3 start:24 end:8786 gi	hemocyanin 1-like OS=Octopus vulgaris OX=6645 GN=LOC115212215 PE=4 SV=2 hemocyanin G-type, units Oda to Odg OS=Octopus vulgaris OX=6645 GN=LOC115211670 PE=4 SV=2 16596797 gb|AAK28276.2| hemocyanin G-type [Enteroctopus dofleini]	A0A6P7SER3; Cluster-58773.162316;orf1 len=2526 frame:3 start:24 end:7601 gi; A0A6P7SDC4; Cluster-58773.162319;orf1 len=2921 frame:3 start:24 end:8786 gi	hemocyanin 1-like OS=Octopus vulgaris OX=6645 GN=LOC115212215 PE=4 SV=2; 16596797 gb|AAK28276.2| hemocyanin G-type [Enteroctopus dofleini]; hemocyanin G-type, units Oda to Odg OS=Octopus vulgaris OX=6645 GN=LOC115211670 PE=4 SV=2; 16596797 gb|AAK28276.2| hemocyanin G-type [Enteroctopus dofleini]	0	3	3	0.6033	0	1	1	1	909.454	2726.35	2726.35	-0.19	-0.00017	0/0	0	0	120567	HCD (High Energy Collision Dissociation)	MS2	22.4995	100	63.7226	12053	12053	12043	MCMMCM34021206.raw	F6	1394	3	3	0.0001881	1.22x10⁻³	0.986
High	Sequest HT	Sequest HT (A2)	A	2	Unambiguous	VNIEDSVISLNGPNSIVGR	VNIEDSVISLNGPNSIVGR		5	A0A2I7NB22	Superoxide dismutase [Cu-Zn] OS=Octopus vulgaris OX=6645 PE=2 SV=1	Cluster-58773.157484;orf1 len=98 frame:-2 start:294 end:1 gi; A0A2I7NB22; A0A6P7TWQ7; Cluster-58773.157450;orf1 len=186 frame:2 start:2 end:559 gi; Cluster-58773.168419;orf1 len=144 frame:-2 start:432 end:1 gi	451844586 gb|AGF70691.1| Cu-Zn superoxide dismutase [Apostichopus japonicus]; Superoxide dismutase [Cu-Zn] OS=Octopus vulgaris OX=6645 PE=2 SV=1; Superoxide dismutase [Cu-Zn] OS=Octopus vulgaris OX=6645 GN=LOC115227776 PE=3 SV=1; 295136547 gb|ADF80414.1| Cu-Zn superoxide dismutase [Ostrea edulis]; 295136547 gb|ADF80414.1| Cu-Zn superoxide dismutase [Ostrea edulis]	0	2	2	0.7294	0	1	1	1	992.029	1983.05	1983.05	0.53	0.00053	0/0	0	0	350440	HCD (High Energy Collision Dissociation)	MS2	4.01449	100	63.6266	12034	12034	12032	MCMMCM34021206.raw	F6	1123	5.1	1	0.0001881	3.18x10⁻¹¹	3.962
High	Sequest HT	Sequest HT (A2)	A	2	Unambiguous	IGFPWSEIR	IGFPWSEIR		9	Cluster-58773.180614;orf1 len=593 frame:1 start:1273 end:3051 gi	762078274 ref|XP_011453109.1| PREDICTED: radixin-like isoform X3 [Crassostrea gigas]>gi|762078276|ref|XP_011453118.1| PREDICTED: radixin-like isoform X4 [Crassostrea gigas]	A0A6P7TVA5; A0A0L8HU31; A0A6P7TLG6; A0A7E6FS61; Cluster-58773.180614;orf1 len=593 frame:1 start:1273 end:3051 gi; A0A812AK12; Cluster-58773.22448;orf1 len=364 frame:3 start:3 end:1094 gi; A0A7E6FS44; Cluster-58773.180608;orf1 len=592 frame:1 start:1282 end:3057 gi	moesin isoform X4 OS=Octopus vulgaris OX=6645 GN=LOC115225885 PE=4 SV=1; FERM domain-containing protein OS=Octopus bimaculoides OX=37653 GN=OCBIM_22005978mg PE=4 SV=1; moesin isoform X3 OS=Octopus vulgaris OX=6645 GN=LOC115225885 PE=4 SV=1; moesin isoform X2 OS=Octopus vulgaris OX=6645 GN=LOC115225885 PE=4 SV=1; 762078274 ref|XP_011453109.1| PREDICTED: radixin-like isoform X3 [Crassostrea gigas]>…	0	2	2	0.4272	0	1	1	1	552.795	1104.58	1104.58	-0.81	-0.00045	0/0	0	0	422320	HCD (High Energy Collision Dissociation)	MS2	2.87617	100	63.622	12033	12033	12032	MCMMCM34021206.raw	F6	1460	2.06	1	0.0001881	2.25x10⁻³	0.882
High	Sequest HT	Sequest HT (A2)	A	2	Unambiguous	VPLKPFSFGAPYNLNALTTK	VPLKPFSFGAPYNLNALTTK		4	A0A6P7SER3; A0A6P7SDC4; Cluster-58773.162319;orf1 len=2921 frame:3 start:24 end:8786 gi	hemocyanin 1-like OS=Octopus vulgaris OX=6645 GN=LOC115212215 PE=4 SV=2 hemocyanin G-type, units Oda to Odg OS=Octopus vulgaris OX=6645 GN=LOC115211670 PE=4 SV=2 16596797 gb|AAK28276.2| hemocyanin G-type [Enteroctopus dofleini]	A0A6P7SER3; Cluster-58773.162316;orf1 len=2526 frame:3 start:24 end:7601 gi; A0A6P7SDC4; Cluster-58773.162319;orf1 len=2921 frame:3 start:24 end:8786 gi	hemocyanin 1-like OS=Octopus vulgaris OX=6645 GN=LOC115212215 PE=4 SV=2; 16596797 gb|AAK28276.2| hemocyanin G-type [Enteroctopus dofleini]; hemocyanin G-type, units Oda to Odg OS=Octopus vulgaris OX=6645 GN=LOC115211670 PE=4 SV=2; 16596797 gb|AAK28276.2| hemocyanin G-type [Enteroctopus dofleini]	0	2	2	0.6385	0	1	1	1	1089.6	2178.2	2178.2	0.4	0.00043	0/0	0	0	366373	HCD (High Energy Collision Dissociation)	MS2	0	100	63.5742	12025	12025	12021	MCMMCM34021206.raw	F6	636	2.96	3	0.0001881	8.93x10⁻⁵	1.431
High	Sequest HT	Sequest HT (A2)	A	2	Unambiguous	SSHDFYESLTDEEPTDVDAPIEEIEK	SSHDFYESLTDEEPTDVDAPIEEIEK		3	A0A6P7SDN6	gelsolin-like protein 2 OS=Octopus vulgaris OX=6645 GN=LOC115211664 PE=4 SV=1	Cluster-58773.161025;orf1 len=319 frame:3 start:135 end:1091 gi; A0A6P7SDN6; Cluster-58773.161026;orf1 len=364 frame:1 start:532 end:1623 gi	443705726 gb|ELU02124.1| hypothetical protein CAPTEDRAFT_154247 [Capitella teleta]; gelsolin-like protein 2 OS=Octopus vulgaris OX=6645 GN=LOC115211664 PE=4 SV=1; 443705726 gb|ELU02124.1| hypothetical protein CAPTEDRAFT_154247 [Capitella teleta]	0	3	3	0.75	0	1	1	1	999.112	2995.32	2995.32	-0.28	-0.00028	0/0	0	0	244481	HCD (High Energy Collision Dissociation)	MS2	0	80.877	63.5653	12023	12023	12021	MCMMCM34021206.raw	F6	373	6.2	1	0.0001881	5.29x10⁻¹⁰	3.483
High	Sequest HT	Sequest HT (A2)	A	2	Unambiguous	ESPFIEDTFPDKTFFVNQK	ESPFIEDTFPDKTFFVNQK		5	Cluster-58773.106213;orf1 len=664 frame:2 start:1019 end:3010 gi	762103719 ref|XP_011434386.1| PREDICTED: neuroglian-like isoform X4 [Crassostrea gigas]	Cluster-58773.90501;orf1 len=574 frame:1 start:379 end:2100 gi; Cluster-58773.106213;orf1 len=664 frame:2 start:1019 end:3010 gi; A0A6P7S854; Cluster-58773.106214;orf2 len=602 frame:2 start:1019 end:2824 gi; A0A7E6ESY7	676427155 ref|XP_009044855.1| hypothetical protein LOTGIDRAFT_237355 [Lottia gigantea]>gi|556115872|gb|ESP04524.1| hypothetical protein LOTGIDRAFT_237355 [Lottia gigantea]; 762103719 ref|XP_011434386.1| PREDICTED: neuroglian-like isoform X4 [Crassostrea gigas]; neuroglian isoform X1 OS=Octopus vulgaris OX=6645 GN=LOC115210201 PE=4 SV=1; 762103719 ref|XP_011434386.1| PREDICTED: neuroglian-like iso…	1	3	3	0.1843	0	1	1	1	763.709	2289.11	2289.11	1.75	0.00133	0/0	0	0	154639	HCD (High Energy Collision Dissociation)	MS2	32.833	100	63.5277	12017	12017	12010	MCMMCM34021206.raw	F6	1256	2.17	1	0.0001881	2.72x10⁻²	0.451
High	Sequest HT	Sequest HT (A2)	A	2	Unambiguous	VPLKPFSFGAPYNLNALTTK	VPLKPFSFGAPYNLNALTTK		4	A0A6P7SER3; A0A6P7SDC4; Cluster-58773.162319;orf1 len=2921 frame:3 start:24 end:8786 gi	hemocyanin 1-like OS=Octopus vulgaris OX=6645 GN=LOC115212215 PE=4 SV=2 hemocyanin G-type, units Oda to Odg OS=Octopus vulgaris OX=6645 GN=LOC115211670 PE=4 SV=2 16596797 gb|AAK28276.2| hemocyanin G-type [Enteroctopus dofleini]	A0A6P7SER3; Cluster-58773.162316;orf1 len=2526 frame:3 start:24 end:7601 gi; A0A6P7SDC4; Cluster-58773.162319;orf1 len=2921 frame:3 start:24 end:8786 gi	hemocyanin 1-like OS=Octopus vulgaris OX=6645 GN=LOC115212215 PE=4 SV=2; 16596797 gb|AAK28276.2| hemocyanin G-type [Enteroctopus dofleini]; hemocyanin G-type, units Oda to Odg OS=Octopus vulgaris OX=6645 GN=LOC115211670 PE=4 SV=2; 16596797 gb|AAK28276.2| hemocyanin G-type [Enteroctopus dofleini]	0	3	3	0.6104	0	1	1	1	726.737	2178.2	2178.2	0.94	0.00068	0/0	0	0	1.68638e+06	HCD (High Energy Collision Dissociation)	MS2	1.55015	19.856	63.4518	12001	12001	11999	MCMMCM34021206.raw	F6	634	4.62	3	0.0001881	4.92x10⁻⁶	1.925
High	Sequest HT	Sequest HT (A2)	A	2	Unambiguous	DGNLSVEELSIGLK	DGNLSVEELSIGLK		3	A0A6P7T446	calcium-dependent protein kinase 12 isoform X2 OS=Octopus vulgaris OX=6645 GN=LOC115219536 PE=4 SV=1	Cluster-58773.182621;orf1 len=134 frame:-2 start:576 end:175 gi; A0A6P7T446; Cluster-58773.182624;orf1 len=142 frame:2 start:260 end:685 gi	354465052 ref|XP_003494994.1| PREDICTED: calmodulin-like protein 5 isoform X1 [Cricetulus griseus]>gi|625256444|ref|XP_007619571.1| PREDICTED: calmodulin-like protein 5 isoform X1 [Cricetulus griseus]>gi|537211778|gb|ERE80713.1| calmodulin-4-like protein [Cricetulus griseus]; calcium-dependent protein kinase 12 isoform X2 OS=Octopus vulgaris OX=6645 GN=LOC115219536 PE=4 SV=1; 354465052 ref|XP_003…	0	2	2	0.6271	0	1	1	1	737.395	1473.78	1473.78	1.66	0.00123	0/0	0	0	218709	HCD (High Energy Collision Dissociation)	MS2	23.134	100	63.4008	11992	11992	11988	MCMMCM34021206.raw	F6	1550	3.03	1	0.0001881	1.77x10⁻⁵	1.708
High	Sequest HT	Sequest HT (A2)	A	2	Unambiguous	IRDLETQLAQLTGQLR	IRDLETQLAQLTGQLR		5	A0A6P7TDP0	70 kDa neurofilament protein OS=Octopus vulgaris OX=6645 GN=LOC115222952 PE=3 SV=1	Cluster-58773.157310;orf1 len=601 frame:1 start:292 end:2094 gi; A0A6P7TDP0; Cluster-58773.157306;orf1 len=353 frame:-3 start:1180 end:122 sp; Cluster-58773.157308;orf1 len=428 frame:-2 start:1371 end:88 sp; Cluster-58773.157309;orf1 len=431 frame:-2 start:1414 end:122 sp	159741 gb|AAA16613.1| omega-crystallin [Enteroctopus dofleini]; 70 kDa neurofilament protein OS=Octopus vulgaris OX=6645 GN=LOC115222952 PE=3 SV=1; Q01241 NF70_DORPE 70 kDa neurofilament protein OS=Doryteuthis pealeii PE=2 SV=1; Q01241 NF70_DORPE 70 kDa neurofilament protein OS=Doryteuthis pealeii PE=2 SV=1; Q01241 NF70_DORPE 70 kDa neurofilament protein OS=Doryteuthis pealeii PE=2 SV=1	1	3	3	0.5672	0	1	1	1	619.018	1855.04	1855.04	-0.42	-0.00026	0/0	0	0	675979	HCD (High Energy Collision Dissociation)	MS2	5.38299	70.791	63.7464	12056	12056	12054	MCMMCM34021206.raw	F6	734	5.73	1	0.0001881	4.83x10⁻⁷	2.321
High	Sequest HT	Sequest HT (A2)	A	2	Unambiguous	SPNGYQQVAAFHGSTQWCPSPDAAVK	SPNGYQQVAAFHGSTQWcPSPDAAVK	C18(Carbamidomethyl)	4	A0A6P7SER3; A0A6P7SDC4; Cluster-58773.162319;orf1 len=2921 frame:3 start:24 end:8786 gi	hemocyanin 1-like OS=Octopus vulgaris OX=6645 GN=LOC115212215 PE=4 SV=2 hemocyanin G-type, units Oda to Odg OS=Octopus vulgaris OX=6645 GN=LOC115211670 PE=4 SV=2 16596797 gb|AAK28276.2| hemocyanin G-type [Enteroctopus dofleini]	A0A6P7SER3; Cluster-58773.162316;orf1 len=2526 frame:3 start:24 end:7601 gi; A0A6P7SDC4; Cluster-58773.162319;orf1 len=2921 frame:3 start:24 end:8786 gi	hemocyanin 1-like OS=Octopus vulgaris OX=6645 GN=LOC115212215 PE=4 SV=2; 16596797 gb|AAK28276.2| hemocyanin G-type [Enteroctopus dofleini]; hemocyanin G-type, units Oda to Odg OS=Octopus vulgaris OX=6645 GN=LOC115211670 PE=4 SV=2; 16596797 gb|AAK28276.2| hemocyanin G-type [Enteroctopus dofleini]	0	3	3	0.563	0	1	1	1	935.101	2803.29	2803.29	-0.01	-1e-05	0/0	0	0	91615	HCD (High Energy Collision Dissociation)	MS2	11.8392	100	66.477	12577	12577	12571	MCMMCM34021206.raw	F6	800	2.7	3	0.0001881	5.22x10⁻³	0.737
High	Sequest HT	Sequest HT (A2)	A	2	Unambiguous	NIKPELFQYLSSLK	NIKPELFQYLSSLK		7	A0A6P7TJS2	insulin-like growth factor-binding protein complex acid labile subunit isoform X1 OS=Octopus vulgaris OX=6645 GN=LOC115225305 PE=4 SV=1	A0A7E6FQN6; A0A7E6FQ69; A0A6P7TJS2; A0A7E6FQN1; A0A7E6FSM9; A0A7E6FQI0; A0A7E6FQL1	insulin-like growth factor-binding protein complex acid labile subunit isoform X7 OS=Octopus vulgaris OX=6645 GN=LOC115225305 PE=4 SV=1; slit homolog 1 protein isoform X4 OS=Octopus vulgaris OX=6645 GN=LOC115225305 PE=4 SV=1; insulin-like growth factor-binding protein complex acid labile subunit isoform X1 OS=Octopus vulgaris OX=6645 GN=LOC115225305 PE=4 SV=1; leucine-rich repeat-containing G-pro…	0	2	2	0.5546	0	1	1	1	840.472	1679.94	1679.94	0.22	0.00018	0/0	0	0	359634	HCD (High Energy Collision Dissociation)	MS2	12.3688	100	63.9918	12103	12103	12098	MCMMCM34021206.raw	F6	724	2.29	1	0.0001881	8.31x10⁻⁶	1.836
High	Sequest HT	Sequest HT (A2)	A	2	Unambiguous	KSVETLTEDEVLNLQVALR	KSVETLTEDEVLNLQVALR		4	A0A6P7SER3; A0A6P7SDC4; Cluster-58773.162319;orf1 len=2921 frame:3 start:24 end:8786 gi	hemocyanin 1-like OS=Octopus vulgaris OX=6645 GN=LOC115212215 PE=4 SV=2 hemocyanin G-type, units Oda to Odg OS=Octopus vulgaris OX=6645 GN=LOC115211670 PE=4 SV=2 16596797 gb|AAK28276.2| hemocyanin G-type [Enteroctopus dofleini]	A0A6P7SER3; Cluster-58773.162316;orf1 len=2526 frame:3 start:24 end:7601 gi; A0A6P7SDC4; Cluster-58773.162319;orf1 len=2921 frame:3 start:24 end:8786 gi	hemocyanin 1-like OS=Octopus vulgaris OX=6645 GN=LOC115212215 PE=4 SV=2; 16596797 gb|AAK28276.2| hemocyanin G-type [Enteroctopus dofleini]; hemocyanin G-type, units Oda to Odg OS=Octopus vulgaris OX=6645 GN=LOC115211670 PE=4 SV=2; 16596797 gb|AAK28276.2| hemocyanin G-type [Enteroctopus dofleini]	1	3	3	0.6624	0	1	1	1	719.729	2157.17	2157.18	-1.23	-0.00089	0/0	0	0	249647	HCD (High Energy Collision Dissociation)	MS2	37.0125	100	64.01	12107	12107	12098	MCMMCM34021206.raw	F6	882	5.51	3	0.0001881	6.84x10⁻⁸	2.654
High	Sequest HT	Sequest HT (A2)	A	2	Unambiguous	FISPGQPVGLYYWK	FISPGQPVGLYYWK		5	Cluster-58773.106213;orf1 len=664 frame:2 start:1019 end:3010 gi	762103719 ref|XP_011434386.1| PREDICTED: neuroglian-like isoform X4 [Crassostrea gigas]	Cluster-58773.90501;orf1 len=574 frame:1 start:379 end:2100 gi; Cluster-58773.106213;orf1 len=664 frame:2 start:1019 end:3010 gi; A0A6P7S854; Cluster-58773.106214;orf2 len=602 frame:2 start:1019 end:2824 gi; A0A7E6ESY7	676427155 ref|XP_009044855.1| hypothetical protein LOTGIDRAFT_237355 [Lottia gigantea]>gi|556115872|gb|ESP04524.1| hypothetical protein LOTGIDRAFT_237355 [Lottia gigantea]; 762103719 ref|XP_011434386.1| PREDICTED: neuroglian-like isoform X4 [Crassostrea gigas]; neuroglian isoform X1 OS=Octopus vulgaris OX=6645 GN=LOC115210201 PE=4 SV=1; 762103719 ref|XP_011434386.1| PREDICTED: neuroglian-like iso…	0	2	2	0.5116	0	1	1	1	827.936	1654.86	1654.86	0.77	0.00064	0/0	0	0	224488	HCD (High Energy Collision Dissociation)	MS2	17.0203	100	64.8009	12259	12259	12252	MCMMCM34021206.raw	F6	1324	2.58	1	0.0001881	2.47x10⁻³	0.866
High	Sequest HT	Sequest HT (A2)	A	2	Unambiguous	FFNLLEAGNEVYGLRK	FFNLLEAGNEVYGLRK		4	A0A7E6EVN8	mucin-like protein OS=Octopus vulgaris OX=6645 GN=LOC115213503 PE=4 SV=1	Cluster-58773.84428;orf1 len=1302 frame:1 start:1 end:3906 gi; A0A7E6EVN8; Cluster-58773.84427;orf2 len=1057 frame:1 start:1 end:3171 gi; Cluster-58773.84430;orf1 len=1319 frame:1 start:1 end:3957 gi	847132402 ref|XP_012819335.1| PREDICTED: mucin-like protein [Xenopus (Silurana) tropicalis]; mucin-like protein OS=Octopus vulgaris OX=6645 GN=LOC115213503 PE=4 SV=1; 313240015 emb|CBY32374.1| unnamed protein product [Oikopleura dioica]; 847132402 ref|XP_012819335.1| PREDICTED: mucin-like protein [Xenopus (Silurana) tropicalis]	1	3	3	0.6518	0	1	1	1	624	1869.98	1869.99	-0.45	-0.00028	0/0	0	0	280457	HCD (High Energy Collision Dissociation)	MS2	18.2389	100	64.7917	12257	12257	12252	MCMMCM34021206.raw	F6	1217	3.59	1	0.0001881	5.69x10⁻⁵	1.508
High	Sequest HT	Sequest HT (A2)	A	2	Unambiguous	VLDSSSLPAPTMIYVPAKDFEEEER	VLDSSSLPAPTMIYVPAKDFEEEER		2	A0A6P7SDC4; Cluster-58773.162319;orf1 len=2921 frame:3 start:24 end:8786 gi	hemocyanin G-type, units Oda to Odg OS=Octopus vulgaris OX=6645 GN=LOC115211670 PE=4 SV=2 16596797 gb|AAK28276.2| hemocyanin G-type [Enteroctopus dofleini]	A0A6P7SDC4; Cluster-58773.162319;orf1 len=2921 frame:3 start:24 end:8786 gi	hemocyanin G-type, units Oda to Odg OS=Octopus vulgaris OX=6645 GN=LOC115211670 PE=4 SV=2; 16596797 gb|AAK28276.2| hemocyanin G-type [Enteroctopus dofleini]	1	3	3	0.6341	0	1	1	1	941.797	2823.38	2823.38	0.34	0.00032	0/0	0	0	749989	HCD (High Energy Collision Dissociation)	MS2	2.98026	39.393	64.7765	12253	12253	12252	MCMMCM34021206.raw	F6	1267	4.4	2	0.0001881	1.09x10⁻⁸	2.967
High	Sequest HT	Sequest HT (A2)	A	2	Unambiguous	MADQLTEEQIAEFK	mADQLTEEQIAEFK	N-Term(Prot)(Met-loss+Acetyl)	1	A0A6P7S9Z4	Calmodulin OS=Octopus vulgaris OX=6645 GN=LOC115210643 PE=3 SV=1	A0A6P7S9Z4	Calmodulin OS=Octopus vulgaris OX=6645 GN=LOC115210643 PE=3 SV=1	0	2	2	0.6015	0	1	1	1	782.381	1563.75	1563.75	0.6	0.00047	0/0	0	0	2.09868e+06	HCD (High Energy Collision Dissociation)	MS2	6.56874	32.552	64.7186	12242	12242	12241	MCMMCM34021206.raw	F6	1317	2.71	1	0.0001881	1.64x10⁻³	0.935
High	Sequest HT	Sequest HT (A2)	A	2	Unambiguous	FYTYPGSLTTPPCHESVTWIVCQETIGCSK	FYTYPGSLTTPPcHESVTWIVcQETIGcSK	C13(Carbamidomethyl); C22(Carbamidomethyl); C28(Carbamidomethyl)	3	A0A6P7SJN1; Cluster-58773.198809;orf1 len=296 frame:2 start:149 end:1036 gi	Carbonic anhydrase OS=Octopus vulgaris OX=6645 GN=LOC115213348 PE=3 SV=1 871209239 ref|XP_012941697.1| PREDICTED: carbonic anhydrase 1-like [Aplysia californica]	A0A0L8G2A1; A0A6P7SJN1; Cluster-58773.198809;orf1 len=296 frame:2 start:149 end:1036 gi	Carbonic anhydrase OS=Octopus bimaculoides OX=37653 GN=OCBIM_22001551mg PE=3 SV=1; Carbonic anhydrase OS=Octopus vulgaris OX=6645 GN=LOC115213348 PE=3 SV=1; 871209239 ref|XP_012941697.1| PREDICTED: carbonic anhydrase 1-like [Aplysia californica]	0	3	3	0.5892	0	1	1	1	1173.54	3518.62	3518.61	2.94	0.00345	0/0	0	0	116844	HCD (High Energy Collision Dissociation)	MS2	28.6836	100	64.694	12239	12239	12230	MCMMCM34021206.raw	F6	677	2.97	2	0.0001881	2.28x10⁻⁶	2.056
High	Sequest HT	Sequest HT (A2)	A	2	Unambiguous	RPQSSYFLFLNDFR	RPQSSYFLFLNDFR		4	A0A6P7SH00	high mobility group protein B1 isoform X1 OS=Octopus vulgaris OX=6645 GN=LOC115212946 PE=4 SV=1	A0A6P7SH00; Cluster-58773.176112;orf1 len=239 frame:3 start:156 end:872 gi; Cluster-58773.176111;orf1 len=291 frame:3 start:3 end:875 gi; A0A0L8GP81	high mobility group protein B1 isoform X1 OS=Octopus vulgaris OX=6645 GN=LOC115212946 PE=4 SV=1; 524897563 ref|XP_005105242.1| PREDICTED: high mobility group protein B3-like [Aplysia californica]; 524897563 ref|XP_005105242.1| PREDICTED: high mobility group protein B3-like [Aplysia californica]; Uncharacterized protein OS=Octopus bimaculoides OX=37653 GN=OCBIM_22030504mg PE=4 SV=1	0	3	3	0.4765	0	1	1	1	597.305	1789.9	1789.9	-0.79	-0.00047	0/0	0	0	594240	HCD (High Energy Collision Dissociation)	MS2	6.60425	61.872	64.6305	12226	12226	12219	MCMMCM34021206.raw	F6	1467	3.61	1	0.0001881	3.98x10⁻⁶	1.961
High	Sequest HT	Sequest HT (A2)	A	2	Unambiguous	MSWEAWAPHLK	mSWEAWAPHLK	N-Term(Prot)(Met-loss+Acetyl)	1	A0A6P7TES8	uncharacterized protein LOC115222385 OS=Octopus vulgaris OX=6645 GN=LOC115222385 PE=3 SV=1	A0A6P7TES8	uncharacterized protein LOC115222385 OS=Octopus vulgaris OX=6645 GN=LOC115222385 PE=3 SV=1	0	2	2	0.4817	0	1	1	1	633.817	1266.63	1266.63	-0.33	-0.00021	0/0	0	0	935816	HCD (High Energy Collision Dissociation)	MS2	4.08521	62.862	64.6146	12222	12222	12219	MCMMCM34021206.raw	F6	1314	1.91	1	0.0001881	3.26x10⁻³	0.818
High	Sequest HT	Sequest HT (A2)	A	2	Unambiguous	VIPGFMLQGGDFTR	VIPGFMLQGGDFTR		3	Cluster-58773.150806;orf1 len=206 frame:3 start:1683 end:2300 gi	700589070 gb|AIU94796.1| hypothetical protein [Phragmatopoma lapidosa]	Cluster-58773.150799;orf1 len=182 frame:-2 start:631 end:86 gi; Cluster-58773.150806;orf1 len=206 frame:3 start:1683 end:2300 gi; A0A6P7SL72	700589070 gb|AIU94796.1| hypothetical protein [Phragmatopoma lapidosa]; 700589070 gb|AIU94796.1| hypothetical protein [Phragmatopoma lapidosa]; Peptidyl-prolyl cis-trans isomerase OS=Octopus vulgaris OX=6645 GN=LOC115213862 PE=3 SV=1	0	2	2	0.6595	0	1	1	1	769.395	1537.78	1537.78	-0.71	-0.00055	0/0	0	0	268238	HCD (High Energy Collision Dissociation)	MS2	29.3538	100	64.5105	12203	12203	12197	MCMMCM34021206.raw	F6	1608	2.32	1	0.0001881	4.80x10⁻⁴	1.145
High	Sequest HT	Sequest HT (A2)	A	2	Unambiguous	NLHGDSPYLIMFGPDICGPGTK	NLHGDSPYLIMFGPDIcGPGTK	C17(Carbamidomethyl)	4	A0A7E6F2W5	Calreticulin OS=Octopus vulgaris OX=6645 GN=LOC115215618 PE=3 SV=1	Cluster-58773.173059;orf2 len=242 frame:2 start:863 end:1588 gi; A0A7E6F2W5; A0A0L8I919; A0A812DBC4	406055040 gb|AFS33112.1| calreticulin [Hyriopsis cumingii]; Calreticulin OS=Octopus vulgaris OX=6645 GN=LOC115215618 PE=3 SV=1; Calreticulin OS=Octopus bimaculoides OX=37653 GN=OCBIM_22027793mg PE=3 SV=1; Calreticulin OS=Sepia pharaonis OX=158019 GN=SPHA_48720 PE=3 SV=1	0	3	3	0.7222	0	1	1	1	797.049	2389.13	2389.13	0.97	0.00077	0/0	0	0	191227	HCD (High Energy Collision Dissociation)	MS2	43.6288	100	64.0054	12106	12106	12098	MCMMCM34021206.raw	F6	1151	3.42	1	0.0001881	5.83x10⁻⁴	1.112
High	Sequest HT	Sequest HT (A2)	A	2	Unambiguous	DKSSDGFEAIASFHALPPLCPNPTAK	DKSSDGFEAIASFHALPPLcPNPTAK	C20(Carbamidomethyl)	4	A0A6P7SER3; A0A6P7SDC4; Cluster-58773.162319;orf1 len=2921 frame:3 start:24 end:8786 gi	hemocyanin 1-like OS=Octopus vulgaris OX=6645 GN=LOC115212215 PE=4 SV=2 hemocyanin G-type, units Oda to Odg OS=Octopus vulgaris OX=6645 GN=LOC115211670 PE=4 SV=2 16596797 gb|AAK28276.2| hemocyanin G-type [Enteroctopus dofleini]	A0A6P7SER3; Cluster-58773.162316;orf1 len=2526 frame:3 start:24 end:7601 gi; A0A6P7SDC4; Cluster-58773.162319;orf1 len=2921 frame:3 start:24 end:8786 gi	hemocyanin 1-like OS=Octopus vulgaris OX=6645 GN=LOC115212215 PE=4 SV=2; 16596797 gb|AAK28276.2| hemocyanin G-type [Enteroctopus dofleini]; hemocyanin G-type, units Oda to Odg OS=Octopus vulgaris OX=6645 GN=LOC115211670 PE=4 SV=2; 16596797 gb|AAK28276.2| hemocyanin G-type [Enteroctopus dofleini]	1	3	3	0.6123	0	1	1	1	924.124	2770.36	2770.35	3	0.00277	0/0	0	0	112692	HCD (High Energy Collision Dissociation)	MS2	0	100	64.4653	12195	12195	12186	MCMMCM34021206.raw	F6	1228	3.25	3	0.0001881	3.35x10⁻³	0.813
High	Sequest HT	Sequest HT (A2)	A	2	Unambiguous	TIGQSADVNFDICTK	TIGQSADVNFDIcTK	C13(Carbamidomethyl)	4	A0A0L8GNM6; A0A6P7SER3; A0A6P7SDC4; Cluster-58773.162319;orf1 len=2921 frame:3 start:24 end:8786 gi	Uncharacterized protein OS=Octopus bimaculoides OX=37653 GN=OCBIM_22031096mg PE=4 SV=1 hemocyanin 1-like OS=Octopus vulgaris OX=6645 GN=LOC115212215 PE=4 SV=2 hemocyanin G-type, units Oda to Odg OS=Octopus vulgaris OX=6645 GN=LOC115211670 PE=4 SV=2 16596797 gb|AAK28276.2| hemocyanin G-type [Enteroctopus dofleini]	A0A0L8GNM6; A0A6P7SER3; A0A6P7SDC4; Cluster-58773.162319;orf1 len=2921 frame:3 start:24 end:8786 gi	Uncharacterized protein OS=Octopus bimaculoides OX=37653 GN=OCBIM_22031096mg PE=4 SV=1; hemocyanin 1-like OS=Octopus vulgaris OX=6645 GN=LOC115212215 PE=4 SV=2; hemocyanin G-type, units Oda to Odg OS=Octopus vulgaris OX=6645 GN=LOC115211670 PE=4 SV=2; 16596797 gb|AAK28276.2| hemocyanin G-type [Enteroctopus dofleini]	0	2	2	0.5049	0	1	1	1	834.899	1668.79	1668.79	0.85	0.00071	0/0	0	0	231405	HCD (High Energy Collision Dissociation)	MS2	19.1441	100	64.3955	12181	12181	12175	MCMMCM34021206.raw	F6	1059	2.04	4	0.0001881	1.50x10⁻⁴	1.343
High	Sequest HT	Sequest HT (A2)	A	2	Unambiguous	ALERPEEPFLAILGGAK	ALERPEEPFLAILGGAK		8	A0A7E6FAS8	Phosphoglycerate kinase OS=Octopus vulgaris OX=6645 GN=LOC115218470 PE=3 SV=1	Cluster-58773.135985;orf1 len=75 frame:-2 start:227 end:3 gi; A0A7E6FAS8; Cluster-58773.161610;orf1 len=425 frame:1 start:292 end:1566 gi; A0A0L8IDN7; A0A0L8IDR5; Cluster-58773.161611;orf1 len=253 frame:2 start:281 end:1039 gi; A0A7E6F8F2; A0A6P7T0G1	291233231 ref|XP_002736557.1| PREDICTED: phosphoglycerate kinase 1-like [Saccoglossus kowalevskii]; Phosphoglycerate kinase OS=Octopus vulgaris OX=6645 GN=LOC115218470 PE=3 SV=1; 762162020 ref|XP_011419255.1| PREDICTED: LOW QUALITY PROTEIN: phosphoglycerate kinase 1-like [Crassostrea gigas]; Phosphoglycerate kinase OS=Octopus bimaculoides OX=37653 GN=OCBIM_22014453mg PE=3 SV=1; Phosphoglycerate k…	0	3	3	0.6174	0	1	1	1	604.341	1811.01	1811.01	1.18	0.00071	0/0	0	0	193808	HCD (High Energy Collision Dissociation)	MS2	22.4974	100	64.3462	12172	12172	12164	MCMMCM34021206.raw	F6	718	2.3	1	0.0001881	3.72x10⁻³	0.795
High	Sequest HT	Sequest HT (A2)	A	2	Unambiguous	DIRPELFEISGGEGSTLYR	DIRPELFEISGGEGSTLYR		4	A0A6P7SER3; A0A6P7SDC4; Cluster-58773.162319;orf1 len=2921 frame:3 start:24 end:8786 gi	hemocyanin 1-like OS=Octopus vulgaris OX=6645 GN=LOC115212215 PE=4 SV=2 hemocyanin G-type, units Oda to Odg OS=Octopus vulgaris OX=6645 GN=LOC115211670 PE=4 SV=2 16596797 gb|AAK28276.2| hemocyanin G-type [Enteroctopus dofleini]	A0A6P7SER3; Cluster-58773.162316;orf1 len=2526 frame:3 start:24 end:7601 gi; A0A6P7SDC4; Cluster-58773.162319;orf1 len=2921 frame:3 start:24 end:8786 gi	hemocyanin 1-like OS=Octopus vulgaris OX=6645 GN=LOC115212215 PE=4 SV=2; 16596797 gb|AAK28276.2| hemocyanin G-type [Enteroctopus dofleini]; hemocyanin G-type, units Oda to Odg OS=Octopus vulgaris OX=6645 GN=LOC115211670 PE=4 SV=2; 16596797 gb|AAK28276.2| hemocyanin G-type [Enteroctopus dofleini]	0	2	2	0.7227	0	1	1	1	1070.04	2139.07	2139.07	1.03	0.0011	0/0	0	0	270773	HCD (High Energy Collision Dissociation)	MS2	48.1451	100	64.1214	12129	12129	12120	MCMMCM34021206.raw	F6	1342	5.59	3	0.0001881	2.04x10⁻¹⁰	3.645
High	Sequest HT	Sequest HT (A2)	A	2	Unambiguous	KSVETLTEDEVLNLQVALR	KSVETLTEDEVLNLQVALR		4	A0A6P7SER3; A0A6P7SDC4; Cluster-58773.162319;orf1 len=2921 frame:3 start:24 end:8786 gi	hemocyanin 1-like OS=Octopus vulgaris OX=6645 GN=LOC115212215 PE=4 SV=2 hemocyanin G-type, units Oda to Odg OS=Octopus vulgaris OX=6645 GN=LOC115211670 PE=4 SV=2 16596797 gb|AAK28276.2| hemocyanin G-type [Enteroctopus dofleini]	A0A6P7SER3; Cluster-58773.162316;orf1 len=2526 frame:3 start:24 end:7601 gi; A0A6P7SDC4; Cluster-58773.162319;orf1 len=2921 frame:3 start:24 end:8786 gi	hemocyanin 1-like OS=Octopus vulgaris OX=6645 GN=LOC115212215 PE=4 SV=2; 16596797 gb|AAK28276.2| hemocyanin G-type [Enteroctopus dofleini]; hemocyanin G-type, units Oda to Odg OS=Octopus vulgaris OX=6645 GN=LOC115211670 PE=4 SV=2; 16596797 gb|AAK28276.2| hemocyanin G-type [Enteroctopus dofleini]	1	2	2	0.733	0	1	1	1	1079.09	2157.18	2157.18	0.54	0.00058	0/0	0	0	722907	HCD (High Energy Collision Dissociation)	MS2	4.73964	69.272	64.0996	12124	12124	12120	MCMMCM34021206.raw	F6	815	6.93	3	0.0001881	5.64x10⁻¹³	4.648
High	Sequest HT	Sequest HT (A2)	A	2	Unambiguous	DIRPELFEISGGEGSTLYR	DIRPELFEISGGEGSTLYR		4	A0A6P7SER3; A0A6P7SDC4; Cluster-58773.162319;orf1 len=2921 frame:3 start:24 end:8786 gi	hemocyanin 1-like OS=Octopus vulgaris OX=6645 GN=LOC115212215 PE=4 SV=2 hemocyanin G-type, units Oda to Odg OS=Octopus vulgaris OX=6645 GN=LOC115211670 PE=4 SV=2 16596797 gb|AAK28276.2| hemocyanin G-type [Enteroctopus dofleini]	A0A6P7SER3; Cluster-58773.162316;orf1 len=2526 frame:3 start:24 end:7601 gi; A0A6P7SDC4; Cluster-58773.162319;orf1 len=2921 frame:3 start:24 end:8786 gi	hemocyanin 1-like OS=Octopus vulgaris OX=6645 GN=LOC115212215 PE=4 SV=2; 16596797 gb|AAK28276.2| hemocyanin G-type [Enteroctopus dofleini]; hemocyanin G-type, units Oda to Odg OS=Octopus vulgaris OX=6645 GN=LOC115211670 PE=4 SV=2; 16596797 gb|AAK28276.2| hemocyanin G-type [Enteroctopus dofleini]	0	3	3	0.6111	0	1	1	1	713.696	2139.07	2139.07	0.14	0.0001	0/0	0	0	1.5979e+06	HCD (High Energy Collision Dissociation)	MS2	19.4763	19.617	64.0928	12122	12122	12120	MCMMCM34021206.raw	F6	1277	3.96	3	0.0001881	1.16x10⁻⁶	2.172
High	Sequest HT	Sequest HT (A2)	A	2	Unambiguous	IDSVIAVGQELVNEQHPQADEFQQHIDDLSTK	IDSVIAVGQELVNEQHPQADEFQQHIDDLSTK		5	A0A6P7SVM2	Spectrin beta chain OS=Octopus vulgaris OX=6645 GN=LOC115216977 PE=3 SV=1	Cluster-58773.164992;orf1 len=2325 frame:1 start:1603 end:8577 gi; A0A6P7SVM2; Cluster-58773.153255;orf1 len=247 frame:-3 start:742 end:2 gi; Cluster-58773.164998;orf1 len=1254 frame:2 start:4973 end:8734 gi; A0A7E6F8D4	762124120 ref|XP_011445063.1| PREDICTED: spectrin beta chain-like isoform X2 [Crassostrea gigas]; Spectrin beta chain OS=Octopus vulgaris OX=6645 GN=LOC115216977 PE=3 SV=1; 524867753 ref|XP_005090684.1| PREDICTED: spectrin beta chain-like isoform X2 [Aplysia californica]; 762124126 ref|XP_011445066.1| PREDICTED: spectrin beta chain-like isoform X5 [Crassostrea gigas]; Spectrin beta chain OS=Octop…	0	4	4	0.4564	0	1	1	1	901.694	3603.75	3603.76	-0.37	-0.00033	0/0	0	0	167060	HCD (High Energy Collision Dissociation)	MS2	4.50377	100	64.0568	12116	12116	12109	MCMMCM34021206.raw	F6	1037	3.9	1	0.0001881	1.01x10⁻⁵	1.802
High	Sequest HT	Sequest HT (A2)	A	2	Unambiguous	LVVMQFEDALIAR	LVVmQFEDALIAR	M4(Oxidation)	6	A0A0L8GNM6; A0A6P7SER3; A0A6P7SDC4; Cluster-58773.162319;orf1 len=2921 frame:3 start:24 end:8786 gi	Uncharacterized protein OS=Octopus bimaculoides OX=37653 GN=OCBIM_22031096mg PE=4 SV=1 hemocyanin 1-like OS=Octopus vulgaris OX=6645 GN=LOC115212215 PE=4 SV=2 hemocyanin G-type, units Oda to Odg OS=Octopus vulgaris OX=6645 GN=LOC115211670 PE=4 SV=2 16596797 gb|AAK28276.2| hemocyanin G-type [Enteroctopus dofleini]	A0A0L8GNM6; A0A6P7SER3; Cluster-58773.162316;orf1 len=2526 frame:3 start:24 end:7601 gi; A0A6P7SDC4; Cluster-58773.162317;orf1 len=187 frame:-3 start:561 end:1 gi; Cluster-58773.162319;orf1 len=2921 frame:3 start:24 end:8786 gi	Uncharacterized protein OS=Octopus bimaculoides OX=37653 GN=OCBIM_22031096mg PE=4 SV=1; hemocyanin 1-like OS=Octopus vulgaris OX=6645 GN=LOC115212215 PE=4 SV=2; 16596797 gb|AAK28276.2| hemocyanin G-type [Enteroctopus dofleini]; hemocyanin G-type, units Oda to Odg OS=Octopus vulgaris OX=6645 GN=LOC115211670 PE=4 SV=2; 52550954 gb|AAU84460.1| hemocyanin A-type [Enteroctopus dofleini]; 16596797 gb|A…	0	2	2	0	0	1	1	1	760.91	1520.81	1520.81	-0.29	-0.00022	0/0	0	0	1.0839e+06	HCD (High Energy Collision Dissociation)	MS2	21.6809	60.469	64.0398	12112	12112	12109	MCMMCM34021206.raw	F6	1249	3.37	4	0.0001881	2.72x10⁻⁵	1.634
High	Sequest HT	Sequest HT (A2)	A	2	Unambiguous	GFVLVQTSWQYNILKEEESK	GFVLVQTSWQYNILKEEESK		9	A0A6P7SI10; Cluster-58773.163468;orf1 len=382 frame:1 start:88 end:1233 gi	CD109 antigen isoform X2 OS=Octopus vulgaris OX=6645 GN=LOC115213260 PE=4 SV=1 410935705 gb|AFV94409.1| thioester-containing protein 1 [Euprymna scolopes]	Cluster-58773.163464;orf1 len=316 frame:-3 start:949 end:2 gi; A0A6P7SI10; Cluster-58773.163471;orf1 len=369 frame:1 start:1 end:1107 gi; A0A7E6F3R1; Cluster-58773.163469;orf1 len=381 frame:1 start:1 end:1143 gi; Cluster-58773.163466;orf1 len=279 frame:-2 start:838 end:2 gi; Cluster-58773.163465;orf1 len=178 frame:-3 start:535 end:2 gi; Cluster-58773.163468;orf1 len=382 frame:1 start:88 end:1233 …	410935705 gb|AFV94409.1| thioester-containing protein 1 [Euprymna scolopes]; CD109 antigen isoform X2 OS=Octopus vulgaris OX=6645 GN=LOC115213260 PE=4 SV=1; 410935705 gb|AFV94409.1| thioester-containing protein 1 [Euprymna scolopes]; CD109 antigen isoform X1 OS=Octopus vulgaris OX=6645 GN=LOC115213260 PE=4 SV=1; 410935705 gb|AFV94409.1| thioester-containing protein 1 [Euprymna scolopes]; 41093570…	1	3	3	0.5693	0	1	1	1	800.082	2398.23	2398.23	0.89	0.00071	0/0	0	0	1282314	HCD (High Energy Collision Dissociation)	MS2	3.2344	26.77	64.0365	12111	12111	12109	MCMMCM34021206.raw	F6	1289	4.11	2	0.0001881	3.91x10⁻⁷	2.357
High	Sequest HT	Sequest HT (A2)	A	2	Unambiguous	TGNFVEPTIITGLAHDAEVVQR	TGNFVEPTIITGLAHDAEVVQR		2	A0A6P7SZ53	Aldehyde dehydrogenase (NAD(+)) OS=Octopus vulgaris OX=6645 GN=LOC115218057 PE=3 SV=1	Cluster-58773.89511;orf1 len=572 frame:2 start:377 end:2092 gi; A0A6P7SZ53	524875173 ref|XP_005094317.1| PREDICTED: alpha-aminoadipic semialdehyde dehydrogenase-like [Aplysia californica]; Aldehyde dehydrogenase (NAD(+)) OS=Octopus vulgaris OX=6645 GN=LOC115218057 PE=3 SV=1	0	3	3	0.6787	0	1	1	1	789.747	2367.23	2367.23	-1.34	-0.00105	0/0	0	0	305581	HCD (High Energy Collision Dissociation)	MS2	29.3205	100	64.4607	12194	12194	12186	MCMMCM34021206.raw	F6	1259	3.33	1	0.0001881	3.52x10⁻⁴	1.198
High	Sequest HT	Sequest HT (A2)	A	2	Unambiguous	NYHDVQDSWASIASIIK	NYHDVQDSWASIASIIK		2	A0A6P7SLJ4	Alpha-galactosidase OS=Octopus vulgaris OX=6645 GN=LOC115213936 PE=3 SV=1	A0A6P7SLJ4; A0A7E6EZD2	Alpha-galactosidase OS=Octopus vulgaris OX=6645 GN=LOC115213936 PE=3 SV=1; Alpha-galactosidase OS=Octopus vulgaris OX=6645 GN=LOC115213936 PE=3 SV=1	0	3	3	0.5871	0	1	1	1	649.658	1946.96	1946.96	-0.8	-0.00052	0/0	0	0	597746	HCD (High Energy Collision Dissociation)	MS2	26.4544	58.658	66.5185	12584	12584	12582	MCMMCM34021206.raw	F6	1315	3.73	1	0.0001881	3.16x10⁻⁴	1.216
High	Sequest HT	Sequest HT (A2)	A	2	Unambiguous	VFATFMLEGIK	VFATFMLEGIK		4	A0A6P7SER3; A0A6P7SDC4; Cluster-58773.162319;orf1 len=2921 frame:3 start:24 end:8786 gi	hemocyanin 1-like OS=Octopus vulgaris OX=6645 GN=LOC115212215 PE=4 SV=2 hemocyanin G-type, units Oda to Odg OS=Octopus vulgaris OX=6645 GN=LOC115211670 PE=4 SV=2 16596797 gb|AAK28276.2| hemocyanin G-type [Enteroctopus dofleini]	A0A6P7SER3; Cluster-58773.162316;orf1 len=2526 frame:3 start:24 end:7601 gi; A0A6P7SDC4; Cluster-58773.162319;orf1 len=2921 frame:3 start:24 end:8786 gi	hemocyanin 1-like OS=Octopus vulgaris OX=6645 GN=LOC115212215 PE=4 SV=2; 16596797 gb|AAK28276.2| hemocyanin G-type [Enteroctopus dofleini]; hemocyanin G-type, units Oda to Odg OS=Octopus vulgaris OX=6645 GN=LOC115211670 PE=4 SV=2; 16596797 gb|AAK28276.2| hemocyanin G-type [Enteroctopus dofleini]	0	2	2	0.6238	0	1	1	1	628.342	1255.68	1255.68	0.3	0.00019	0/0	0	0	2049525	HCD (High Energy Collision Dissociation)	MS2	3.01441	28.916	66.5771	12595	12595	12593	MCMMCM34021206.raw	F6	1041	3.03	3	0.0001881	2.78x10⁻⁵	1.63
High	Sequest HT	Sequest HT (A2)	A	2	Unambiguous	LFTPWSWDSSK	LFTPWSWDSSK		4	Cluster-58773.193716;orf1 len=468 frame:2 start:29 end:1432 gi	676464997 ref|XP_009057101.1| hypothetical protein LOTGIDRAFT_233221 [Lottia gigantea]>gi|556103524|gb|ESO92176.1| hypothetical protein LOTGIDRAFT_233221 [Lottia gigantea]	Cluster-58773.193716;orf1 len=468 frame:2 start:29 end:1432 gi; Cluster-58773.110433;orf1 len=457 frame:-2 start:1371 end:1 gi; Cluster-58773.110432;orf1 len=467 frame:1 start:76 end:1476 gi; A0A6P7TYV0	676464997 ref|XP_009057101.1| hypothetical protein LOTGIDRAFT_233221 [Lottia gigantea]>gi|556103524|gb|ESO92176.1| hypothetical protein LOTGIDRAFT_233221 [Lottia gigantea]; 676464997 ref|XP_009057101.1| hypothetical protein LOTGIDRAFT_233221 [Lottia gigantea]>gi|556103524|gb|ESO92176.1| hypothetical protein LOTGIDRAFT_233221 [Lottia gigantea]; 676464997 ref|XP_009057101.1| hypothetical protein LO…	0	2	2	0.4921	0	1	1	1	677.327	1353.65	1353.65	-1	-0.00068	0/0	0	0	383329	HCD (High Energy Collision Dissociation)	MS2	32.1808	100	66.5895	12598	12598	12593	MCMMCM34021206.raw	F6	1062	2.54	1	0.0001881	1.57x10⁻⁴	1.335
High	Sequest HT	Sequest HT (A2)	A	2	Unambiguous	GHNKPITALTTTPDRK	GHNKPITALTTTPDRK		4	A0A6P7TGU1	actin-interacting protein 1 isoform X1 OS=Octopus vulgaris OX=6645 GN=LOC115223147 PE=4 SV=1	A0A6P7TGU1; A0A7E6FMD7; Cluster-58773.113807;orf1 len=639 frame:1 start:16 end:1932 gi; Cluster-58773.113804;orf1 len=520 frame:1 start:16 end:1575 gi	actin-interacting protein 1 isoform X1 OS=Octopus vulgaris OX=6645 GN=LOC115223147 PE=4 SV=1; actin-interacting protein 1 isoform X2 OS=Octopus vulgaris OX=6645 GN=LOC115223147 PE=4 SV=1; 675863458 ref|XP_009017289.1| hypothetical protein HELRODRAFT_156976 [Helobdella robusta]>gi|555701477|gb|ESO04710.1| hypothetical protein HELRODRAFT_156976 [Helobdella robusta]; 675863458 ref|XP_009017289.1| hy…	1	4	4	0.4901	0	1	1	1	438.245	1749.96	1749.96	-0.76	-0.00033	0/0	0	0	210357	HCD (High Energy Collision Dissociation)	MS2	12.8684	100	19.553	3563	3563	3561	MCMMCM34021207.raw	F7	889	3.55	1	0.0001881	1.45x10⁻⁴	1.349
High	Sequest HT	Sequest HT (A2)	A	2	Unambiguous	DSYVGDEAQSKR	DSYVGDEAQSKR		26	A0A6P7SM13; I0JGT9	actin, cytoplasmic OS=Octopus vulgaris OX=6645 GN=LOC115214121 PE=3 SV=1 Actin I OS=Sepia officinalis OX=6610 GN=ACTI PE=2 SV=1	I0JGU0; Cluster-659.0;orf1 len=379 frame:3 start:45 end:1181 gi; A0A6P7SKQ4; Cluster-382.0;orf1 len=114 frame:-3 start:342 end:1 gi; F1ADJ3; D3GBA7; Cluster-58773.161083;orf1 len=335 frame:2 start:2273 end:3277 gi; A4D0I0; F1ADJ2; Cluster-116978.7;orf1 len=236 frame:-3 start:710 end:3 gi; A0A6P7SM13; G3LVJ6; A0A0L8GHK7; A0A6P7U554; A0A812CKE2; D3GBA8; A0A812C079; A0A0L8GHH1; A0A2S1FRU5; A0A0L8G4I…	Actin II OS=Sepia officinalis OX=6610 GN=ACTII PE=2 SV=1; 10304437 gb|AAG16253.1|AF300705_1 beta-actin [Litopenaeus vannamei]>gi|13647003|dbj|BAB41102.1| actin [Marsupenaeus japonicus]>gi|34576243|emb|CAE46725.1| beta actin [Homarus gammarus]>gi|51472040|gb|AAU04441.1| beta-actin [Macrobrachium rosenbergii]>gi|68138000|gb|AAY85815.1| beta-actin [Callinectes sapidus]>gi|77955978|gb|ABB05541.1| bet…	1	3	3	0.6088	0	1	1	1	452.212	1354.62	1354.62	-0.94	-0.00042	0/0	0	0	229698	HCD (High Energy Collision Dissociation)	MS2	14.3192	100	19.5484	3562	3562	3561	MCMMCM34021207.raw	F7	753	3.17	2	0.0001881	7.53x10⁻⁵	1.46
High	Sequest HT	Sequest HT (A2)	A	2	Unambiguous	AGAKPEMASQMSTENRR	AGAKPEMASQMSTENRR		2	A0A7E6FJC7	70 kDa neurofilament protein-like isoform X4 OS=Octopus vulgaris OX=6645 GN=LOC115222739 PE=3 SV=1	A0A7E6FJC7; Cluster-58773.166581;orf1 len=88 frame:1 start:1 end:264 gi	70 kDa neurofilament protein-like isoform X4 OS=Octopus vulgaris OX=6645 GN=LOC115222739 PE=3 SV=1; 159741 gb|AAA16613.1| omega-crystallin [Enteroctopus dofleini]	1	4	4	0.5539	0	1	1	1	466.726	1863.88	1863.88	0.11	5e-05	0/0	0	0	175759	HCD (High Energy Collision Dissociation)	MS2	4.89633	100	19.5007	3554	3554	3550	MCMMCM34021207.raw	F7	1055	3.34	1	0.0001881	7.46x10⁻⁵	1.462
High	Sequest HT	Sequest HT (A2)	A	2	Unambiguous	AEEADEEVKEEEK	AEEADEEVKEEEK		4	A0A6P7SYG8	transcription factor iws-1 isoform X2 OS=Octopus vulgaris OX=6645 GN=LOC115217874 PE=4 SV=1	A0A6P7SYG8; A0A0L8HEB5; A0A0L8HE44; A0A7E6F9H9	transcription factor iws-1 isoform X2 OS=Octopus vulgaris OX=6645 GN=LOC115217874 PE=4 SV=1; Uncharacterized protein OS=Octopus bimaculoides OX=37653 GN=OCBIM_22016667mg PE=4 SV=1; Uncharacterized protein OS=Octopus bimaculoides OX=37653 GN=OCBIM_22016667mg PE=4 SV=1; transcription factor iws-1 isoform X1 OS=Octopus vulgaris OX=6645 GN=LOC115217874 PE=4 SV=1	1	3	3	0.2157	0	1	1	1	512.23	1534.67	1534.68	-0.82	-0.00042	0/0	0	0	43741.5	HCD (High Energy Collision Dissociation)	MS2	33.8163	100	19.1921	3496	3496	3495	MCMMCM34021207.raw	F7	480	1.53	1	0.0001881	7.18x10⁻³	0.683
High	Sequest HT	Sequest HT (A2)	A	2	Unambiguous	VSEGSTSQGETASAASSEK	VSEGSTSQGETASAASSEK		3	A0A6P7SVS2	UV excision repair protein RAD23 OS=Octopus vulgaris OX=6645 GN=LOC115216665 PE=3 SV=1	Cluster-58773.142001;orf1 len=423 frame:3 start:108 end:1376 gi; A0A6P7SVS2; A0A0L8H656	83415124 ref|NP_001032776.1| uncharacterized protein LOC562839 [Danio rerio]>gi|79154071|gb|AAI08001.1| Zgc:123349 [Danio rerio]; UV excision repair protein RAD23 OS=Octopus vulgaris OX=6645 GN=LOC115216665 PE=3 SV=1; Uncharacterized protein OS=Octopus bimaculoides OX=37653 GN=OCBIM_22021444mg PE=4 SV=1	0	2	2	0.5833	0	1	1	1	906.909	1812.81	1812.81	1.19	0.00108	0/0	0	0	90037.7	HCD (High Energy Collision Dissociation)	MS2	0	100	19.0777	3474	3474	3473	MCMMCM34021207.raw	F7	642	2.52	1	0.0001881	7.04x10⁻⁶	1.864
High	Sequest HT	Sequest HT (A2)	A	2	Unambiguous	VSAATGEASSSGPTR	VSAATGEASSSGPTR		6	A0A6P7SVM2	Spectrin beta chain OS=Octopus vulgaris OX=6645 GN=LOC115216977 PE=3 SV=1	A0A0L8GFP6; Cluster-58773.164992;orf1 len=2325 frame:1 start:1603 end:8577 gi; A0A6P7SVM2; A0A0L8GFI1; Cluster-58773.164994;orf1 len=452 frame:-3 start:1542 end:187 gi; Cluster-58773.164998;orf1 len=1254 frame:2 start:4973 end:8734 gi	Spectrin beta chain OS=Octopus bimaculoides OX=37653 GN=OCBIM_22034275mg PE=3 SV=1; 762124120 ref|XP_011445063.1| PREDICTED: spectrin beta chain-like isoform X2 [Crassostrea gigas]; Spectrin beta chain OS=Octopus vulgaris OX=6645 GN=LOC115216977 PE=3 SV=1; Spectrin beta chain OS=Octopus bimaculoides OX=37653 GN=OCBIM_22034275mg PE=3 SV=1; 328699230 ref|XP_003240873.1| PREDICTED: spectrin beta cha…	0	2	2	0.7785	0	1	1	1	689.334	1377.66	1377.66	-0.32	-0.00022	0/0	0	0	65088.2	HCD (High Energy Collision Dissociation)	MS2	6.2327	100	18.7952	3419	3419	3418	MCMMCM34021207.raw	F7	1238	3.07	1	0.0001881	9.26x10⁻⁷	2.21
High	Sequest HT	Sequest HT (A2)	A	2	Unambiguous	YAEAEEDRPTSTQQSR	YAEAEEDRPTSTQQSR		7	A0A6P7SMF2	PDZ and LIM domain protein Zasp isoform X3 OS=Octopus vulgaris OX=6645 GN=LOC115214533 PE=4 SV=1	A0A6P7SMF2; A0A6P7SMT8; Cluster-58773.158063;orf1 len=125 frame:3 start:3 end:377 gi; A0A6P7SNZ7; Cluster-58773.158060;orf1 len=200 frame:3 start:3 end:602 gi; Cluster-58773.158064;orf1 len=139 frame:-2 start:417 end:1 gi; A0A7E6F0K7	PDZ and LIM domain protein Zasp isoform X3 OS=Octopus vulgaris OX=6645 GN=LOC115214533 PE=4 SV=1; PDZ and LIM domain protein Zasp isoform X1 OS=Octopus vulgaris OX=6645 GN=LOC115214533 PE=4 SV=1; 871267730 ref|XP_012944394.1| PREDICTED: PDZ and LIM domain protein Zasp-like isoform X2 [Aplysia californica]; PDZ and LIM domain protein Zasp isoform X2 OS=Octopus vulgaris OX=6645 GN=LOC115214533 PE=4…	0	3	3	0.441	0	1	1	1	623.285	1867.84	1867.84	-1.33	-0.00083	0/0	0	0	47231.4	HCD (High Energy Collision Dissociation)	MS2	4.24855	100	18.7483	3410	3410	3407	MCMMCM34021207.raw	F7	643	2.29	1	0.0001881	7.67x10⁻⁴	1.065
High	Sequest HT	Sequest HT (A2)	A	2	Unambiguous	TNCRPLPQNPR	TNcRPLPQNPR	C3(Carbamidomethyl)	6	Cluster-58773.181383;orf1 len=2076 frame:2 start:398 end:6625 gi	762115637 ref|XP_011440628.1| PREDICTED: uncharacterized protein LOC105337560 isoform X1 [Crassostrea gigas]	A0A7E6EZI8; Cluster-58773.181383;orf1 len=2076 frame:2 start:398 end:6625 gi; A0A0L8FNC4; Cluster-58773.181384;orf1 len=732 frame:2 start:2 end:2197 gi; Cluster-58773.181381;orf1 len=196 frame:-3 start:590 end:3 gi; Cluster-58773.181380;orf1 len=1796 frame:2 start:1430 end:6817 gi	uncharacterized protein LOC115214248 OS=Octopus vulgaris OX=6645 GN=LOC115214248 PE=4 SV=1; 762115637 ref|XP_011440628.1| PREDICTED: uncharacterized protein LOC105337560 isoform X1 [Crassostrea gigas]; Uncharacterized protein (Fragment) OS=Octopus bimaculoides OX=37653 GN=OCBIM_22013362mg PE=4 SV=1; 676460412 ref|XP_009055614.1| hypothetical protein LOTGIDRAFT_153481 [Lottia gigantea]>gi|55610535…	0	3	3	0.5278	0	1	1	1	451.566	1352.68	1352.69	-0.62	-0.00028	0/0	0	0	48437.5	HCD (High Energy Collision Dissociation)	MS2	39.7998	100	18.6867	3398	3398	3396	MCMMCM34021207.raw	F7	1351	2.52	1	0.0001881	8.22x10⁻⁴	1.053
High	Sequest HT	Sequest HT (A2)	A	2	Unambiguous	DSYVGDEAQSKR	DSYVGDEAQSKR		26	A0A6P7SM13; I0JGT9	actin, cytoplasmic OS=Octopus vulgaris OX=6645 GN=LOC115214121 PE=3 SV=1 Actin I OS=Sepia officinalis OX=6610 GN=ACTI PE=2 SV=1	I0JGU0; Cluster-659.0;orf1 len=379 frame:3 start:45 end:1181 gi; A0A6P7SKQ4; Cluster-382.0;orf1 len=114 frame:-3 start:342 end:1 gi; F1ADJ3; D3GBA7; Cluster-58773.161083;orf1 len=335 frame:2 start:2273 end:3277 gi; A4D0I0; F1ADJ2; Cluster-116978.7;orf1 len=236 frame:-3 start:710 end:3 gi; A0A6P7SM13; G3LVJ6; A0A0L8GHK7; A0A6P7U554; A0A812CKE2; D3GBA8; A0A812C079; A0A0L8GHH1; A0A2S1FRU5; A0A0L8G4I…	Actin II OS=Sepia officinalis OX=6610 GN=ACTII PE=2 SV=1; 10304437 gb|AAG16253.1|AF300705_1 beta-actin [Litopenaeus vannamei]>gi|13647003|dbj|BAB41102.1| actin [Marsupenaeus japonicus]>gi|34576243|emb|CAE46725.1| beta actin [Homarus gammarus]>gi|51472040|gb|AAU04441.1| beta-actin [Macrobrachium rosenbergii]>gi|68138000|gb|AAY85815.1| beta-actin [Callinectes sapidus]>gi|77955978|gb|ABB05541.1| bet…	1	2	2	0.6281	0	1	1	1	677.815	1354.62	1354.62	-0.77	-0.00052	0/0	0	0	109928	HCD (High Energy Collision Dissociation)	MS2	0	100	19.5575	3564	3564	3561	MCMMCM34021207.raw	F7	746	2.42	2	0.0001881	4.39x10⁻⁵	1.552
High	Sequest HT	Sequest HT (A2)	A	2	Unambiguous	EDNTNNTSSVDSTGPHADTQK	EDNTNNTSSVDSTGPHADTQK		3	A0A6P7SZG0	cAMP-regulated phosphoprotein 19 OS=Octopus vulgaris OX=6645 GN=LOC115217970 PE=3 SV=1	Cluster-58773.220662;orf1 len=144 frame:-3 start:433 end:2 gi; Cluster-58773.117283;orf1 len=179 frame:1 start:199 end:735 gi; A0A6P7SZG0	676439219 ref|XP_009048785.1| hypothetical protein LOTGIDRAFT_149783 [Lottia gigantea]>gi|556112014|gb|ESP00666.1| hypothetical protein LOTGIDRAFT_149783 [Lottia gigantea]; 676439219 ref|XP_009048785.1| hypothetical protein LOTGIDRAFT_149783 [Lottia gigantea]>gi|556112014|gb|ESP00666.1| hypothetical protein LOTGIDRAFT_149783 [Lottia gigantea]; cAMP-regulated phosphoprotein 19 OS=Octopus vulgaris …	0	3	3	0.4351	0	1	1	1	739.988	2217.95	2217.95	0.47	0.00034	0/0	0	0	48447.2	HCD (High Energy Collision Dissociation)	MS2	0	100	18.682	3397	3397	3396	MCMMCM34021207.raw	F7	261	1.54	1	0.0001881	6.58x10⁻³	0.698
High	Sequest HT	Sequest HT (A2)	A	2	Unambiguous	AASSEMTDEVHK	AASSEmTDEVHK	M6(Oxidation)	4	A0A6P7SI10; Cluster-58773.163438;orf1 len=994 frame:2 start:254 end:3235 gi	CD109 antigen isoform X2 OS=Octopus vulgaris OX=6645 GN=LOC115213260 PE=4 SV=1 410935705 gb|AFV94409.1| thioester-containing protein 1 [Euprymna scolopes]	A0A6P7SI10; A0A7E6F3R1; Cluster-58773.163438;orf1 len=994 frame:2 start:254 end:3235 gi; Cluster-58773.160937;orf1 len=552 frame:-3 start:1658 end:3 gi	CD109 antigen isoform X2 OS=Octopus vulgaris OX=6645 GN=LOC115213260 PE=4 SV=1; CD109 antigen isoform X1 OS=Octopus vulgaris OX=6645 GN=LOC115213260 PE=4 SV=1; 410935705 gb|AFV94409.1| thioester-containing protein 1 [Euprymna scolopes]; 410935705 gb|AFV94409.1| thioester-containing protein 1 [Euprymna scolopes]	0	3	3	0.4244	0	1	1	1	440.862	1320.57	1320.57	-1.39	-0.00061	0/0	0	0	140873	HCD (High Energy Collision Dissociation)	MS2	0.654104	100	13.3423	2395	2395	2394	MCMMCM34021207.raw	F7	302	2.05	2	0.0001881	7.53x10⁻⁴	1.068
High	Sequest HT	Sequest HT (A2)	A	2	Unambiguous	SVETLTEDEVLNLQVALR	SVETLTEDEVLNLQVALR		4	A0A6P7SER3; A0A6P7SDC4; Cluster-58773.162319;orf1 len=2921 frame:3 start:24 end:8786 gi	hemocyanin 1-like OS=Octopus vulgaris OX=6645 GN=LOC115212215 PE=4 SV=2 hemocyanin G-type, units Oda to Odg OS=Octopus vulgaris OX=6645 GN=LOC115211670 PE=4 SV=2 16596797 gb|AAK28276.2| hemocyanin G-type [Enteroctopus dofleini]	A0A6P7SER3; Cluster-58773.162316;orf1 len=2526 frame:3 start:24 end:7601 gi; A0A6P7SDC4; Cluster-58773.162319;orf1 len=2921 frame:3 start:24 end:8786 gi	hemocyanin 1-like OS=Octopus vulgaris OX=6645 GN=LOC115212215 PE=4 SV=2; 16596797 gb|AAK28276.2| hemocyanin G-type [Enteroctopus dofleini]; hemocyanin G-type, units Oda to Odg OS=Octopus vulgaris OX=6645 GN=LOC115211670 PE=4 SV=2; 16596797 gb|AAK28276.2| hemocyanin G-type [Enteroctopus dofleini]	0	3	3	0.6358	0	1	1	1	677.032	2029.08	2029.08	0.37	0.00025	0/0	0	0	333229	HCD (High Energy Collision Dissociation)	MS2	62.9883	100	79.2966	14830	14830	14829	MCMMCM34021206.raw	F6	1145	3.46	3	0.0001881	1.46x10⁻⁶	2.132
High	Sequest HT	Sequest HT (A2)	A	2	Unambiguous	LVVMQFEDALLAR	LVVMQFEDALLAR		3	Q9BJ58; O61363; Q5XLV2	Hemocyanin G-type (Fragment) OS=Enteroctopus dofleini OX=267067 PE=4 SV=2 Hemocyanin G-type, units Oda to Odg OS=Enteroctopus dofleini OX=267067 GN=ODHCY PE=1 SV=1 Hemocyanin A-type (Fragment) OS=Enteroctopus dofleini OX=267067 GN=HA PE=4 SV=1	Q9BJ58; O61363; Q5XLV2	Hemocyanin G-type (Fragment) OS=Enteroctopus dofleini OX=267067 PE=4 SV=2; Hemocyanin G-type, units Oda to Odg OS=Enteroctopus dofleini OX=267067 GN=ODHCY PE=1 SV=1; Hemocyanin A-type (Fragment) OS=Enteroctopus dofleini OX=267067 GN=HA PE=4 SV=1	0	2	2	0	0	1	1	1	752.915	1504.82	1504.82	1.75	0.00132	0/0	0	0	26857.9	HCD (High Energy Collision Dissociation)	MS2	85.8779	100	78.6225	14714	14714	14704	MCMMCM34021206.raw	F6	1073	2.05	3	0.0001881	3.10x10⁻⁴	1.219
High	Sequest HT	Sequest HT (A2)	A	2	Unambiguous	SVETLTEDEVLNLQVALR	SVETLTEDEVLNLQVALR		4	A0A6P7SER3; A0A6P7SDC4; Cluster-58773.162319;orf1 len=2921 frame:3 start:24 end:8786 gi	hemocyanin 1-like OS=Octopus vulgaris OX=6645 GN=LOC115212215 PE=4 SV=2 hemocyanin G-type, units Oda to Odg OS=Octopus vulgaris OX=6645 GN=LOC115211670 PE=4 SV=2 16596797 gb|AAK28276.2| hemocyanin G-type [Enteroctopus dofleini]	A0A6P7SER3; Cluster-58773.162316;orf1 len=2526 frame:3 start:24 end:7601 gi; A0A6P7SDC4; Cluster-58773.162319;orf1 len=2921 frame:3 start:24 end:8786 gi	hemocyanin 1-like OS=Octopus vulgaris OX=6645 GN=LOC115212215 PE=4 SV=2; 16596797 gb|AAK28276.2| hemocyanin G-type [Enteroctopus dofleini]; hemocyanin G-type, units Oda to Odg OS=Octopus vulgaris OX=6645 GN=LOC115211670 PE=4 SV=2; 16596797 gb|AAK28276.2| hemocyanin G-type [Enteroctopus dofleini]	0	2	2	0.6512	0	1	1	1	1015.04	2029.08	2029.08	-0.47	-0.00048	0/0	0	0	311587	HCD (High Energy Collision Dissociation)	MS2	71.1531	100	78.2594	14649	14649	14648	MCMMCM34021206.raw	F6	1166	3.67	3	0.0001881	2.99x10⁻¹⁰	3.58
High	Sequest HT	Sequest HT (A2)	A	2	Unambiguous	MHIPLEDLYVHGSTIHLEVVIETVDGK	MHIPLEDLYVHGSTIHLEVVIETVDGK		2	A0A6P7SER3; A0A6P7SDC4	hemocyanin 1-like OS=Octopus vulgaris OX=6645 GN=LOC115212215 PE=4 SV=2 hemocyanin G-type, units Oda to Odg OS=Octopus vulgaris OX=6645 GN=LOC115211670 PE=4 SV=2	A0A6P7SER3; A0A6P7SDC4	hemocyanin 1-like OS=Octopus vulgaris OX=6645 GN=LOC115212215 PE=4 SV=2; hemocyanin G-type, units Oda to Odg OS=Octopus vulgaris OX=6645 GN=LOC115211670 PE=4 SV=2	0	4	4	0.5232	0	1	1	1	761.899	3044.58	3044.58	-0.12	-0.0001	0/0	0	0	199462	HCD (High Energy Collision Dissociation)	MS2	42.0683	100	78.0379	14610	14610	14604	MCMMCM34021206.raw	F6	1039	3.02	2	0.0001881	7.58x10⁻⁵	1.459
High	Sequest HT	Sequest HT (A2)	A	2	Unambiguous	TIGQSADVNFDICTK	TIGQSADVNFDIcTK	C13(Carbamidomethyl)	4	A0A0L8GNM6; A0A6P7SER3; A0A6P7SDC4; Cluster-58773.162319;orf1 len=2921 frame:3 start:24 end:8786 gi	Uncharacterized protein OS=Octopus bimaculoides OX=37653 GN=OCBIM_22031096mg PE=4 SV=1 hemocyanin 1-like OS=Octopus vulgaris OX=6645 GN=LOC115212215 PE=4 SV=2 hemocyanin G-type, units Oda to Odg OS=Octopus vulgaris OX=6645 GN=LOC115211670 PE=4 SV=2 16596797 gb|AAK28276.2| hemocyanin G-type [Enteroctopus dofleini]	A0A0L8GNM6; A0A6P7SER3; A0A6P7SDC4; Cluster-58773.162319;orf1 len=2921 frame:3 start:24 end:8786 gi	Uncharacterized protein OS=Octopus bimaculoides OX=37653 GN=OCBIM_22031096mg PE=4 SV=1; hemocyanin 1-like OS=Octopus vulgaris OX=6645 GN=LOC115212215 PE=4 SV=2; hemocyanin G-type, units Oda to Odg OS=Octopus vulgaris OX=6645 GN=LOC115211670 PE=4 SV=2; 16596797 gb|AAK28276.2| hemocyanin G-type [Enteroctopus dofleini]	0	2	2	0.6184	0	1	1	1	834.899	1668.79	1668.79	0.13	0.00011	0/0	0	0	222584	HCD (High Energy Collision Dissociation)	MS2	60.2672	100	78.0286	14608	14608	14604	MCMMCM34021206.raw	F6	1049	2.07	4	0.0001881	5.21x10⁻⁴	1.131
High	Sequest HT	Sequest HT (A2)	A	2	Unambiguous	LVVMQFEDALLAR	LVVMQFEDALLAR		3	Q9BJ58; O61363; Q5XLV2	Hemocyanin G-type (Fragment) OS=Enteroctopus dofleini OX=267067 PE=4 SV=2 Hemocyanin G-type, units Oda to Odg OS=Enteroctopus dofleini OX=267067 GN=ODHCY PE=1 SV=1 Hemocyanin A-type (Fragment) OS=Enteroctopus dofleini OX=267067 GN=HA PE=4 SV=1	Q9BJ58; O61363; Q5XLV2	Hemocyanin G-type (Fragment) OS=Enteroctopus dofleini OX=267067 PE=4 SV=2; Hemocyanin G-type, units Oda to Odg OS=Enteroctopus dofleini OX=267067 GN=ODHCY PE=1 SV=1; Hemocyanin A-type (Fragment) OS=Enteroctopus dofleini OX=267067 GN=HA PE=4 SV=1	0	2	2	0	0	1	1	1	752.913	1504.82	1504.82	-0.09	-7e-05	0/0	0	0	269901	HCD (High Energy Collision Dissociation)	MS2	59.2775	100	78.0241	14607	14607	14604	MCMMCM34021206.raw	F6	1096	2.8	3	0.0001881	5.97x10⁻⁷	2.285
High	Sequest HT	Sequest HT (A2)	A	2	Unambiguous	KSVETLTEDEVLNLQVALR	KSVETLTEDEVLNLQVALR		4	A0A6P7SER3; A0A6P7SDC4; Cluster-58773.162319;orf1 len=2921 frame:3 start:24 end:8786 gi	hemocyanin 1-like OS=Octopus vulgaris OX=6645 GN=LOC115212215 PE=4 SV=2 hemocyanin G-type, units Oda to Odg OS=Octopus vulgaris OX=6645 GN=LOC115211670 PE=4 SV=2 16596797 gb|AAK28276.2| hemocyanin G-type [Enteroctopus dofleini]	A0A6P7SER3; Cluster-58773.162316;orf1 len=2526 frame:3 start:24 end:7601 gi; A0A6P7SDC4; Cluster-58773.162319;orf1 len=2921 frame:3 start:24 end:8786 gi	hemocyanin 1-like OS=Octopus vulgaris OX=6645 GN=LOC115212215 PE=4 SV=2; 16596797 gb|AAK28276.2| hemocyanin G-type [Enteroctopus dofleini]; hemocyanin G-type, units Oda to Odg OS=Octopus vulgaris OX=6645 GN=LOC115211670 PE=4 SV=2; 16596797 gb|AAK28276.2| hemocyanin G-type [Enteroctopus dofleini]	1	3	3	0.6471	0	1	1	1	719.729	2157.17	2157.18	-1.41	-0.00101	0/0	0	0	300542	HCD (High Energy Collision Dissociation)	MS2	33.7394	100	78.0149	14605	14605	14604	MCMMCM34021206.raw	F6	890	3.74	3	0.0001881	9.90x10⁻⁶	1.806
High	Sequest HT	Sequest HT (A2)	A	2	Unambiguous	VQADSSDNGYQK	VQADSSDNGYQK		4	A0A0L8GNM6; A0A6P7SER3; A0A6P7SDC4; Cluster-58773.162319;orf1 len=2921 frame:3 start:24 end:8786 gi	Uncharacterized protein OS=Octopus bimaculoides OX=37653 GN=OCBIM_22031096mg PE=4 SV=1 hemocyanin 1-like OS=Octopus vulgaris OX=6645 GN=LOC115212215 PE=4 SV=2 hemocyanin G-type, units Oda to Odg OS=Octopus vulgaris OX=6645 GN=LOC115211670 PE=4 SV=2 16596797 gb|AAK28276.2| hemocyanin G-type [Enteroctopus dofleini]	A0A0L8GNM6; A0A6P7SER3; A0A6P7SDC4; Cluster-58773.162319;orf1 len=2921 frame:3 start:24 end:8786 gi	Uncharacterized protein OS=Octopus bimaculoides OX=37653 GN=OCBIM_22031096mg PE=4 SV=1; hemocyanin 1-like OS=Octopus vulgaris OX=6645 GN=LOC115212215 PE=4 SV=2; hemocyanin G-type, units Oda to Odg OS=Octopus vulgaris OX=6645 GN=LOC115211670 PE=4 SV=2; 16596797 gb|AAK28276.2| hemocyanin G-type [Enteroctopus dofleini]	0	2	2	0.7866	0	1	1	1	656.294	1311.58	1311.58	0.44	0.00029	0/0	0	0	195070	HCD (High Energy Collision Dissociation)	MS2	0	100	15.313	2755	2755	2754	MCMMCM34021207.raw	F7	491	2.53	4	0.0001881	2.07x10⁻⁵	1.68
High	Sequest HT	Sequest HT (A2)	A	2	Unambiguous	LFVVQFEQALHR	LFVVQFEQALHR		4	A0A6P7SER3; A0A6P7SDC4; Cluster-58773.162319;orf1 len=2921 frame:3 start:24 end:8786 gi	hemocyanin 1-like OS=Octopus vulgaris OX=6645 GN=LOC115212215 PE=4 SV=2 hemocyanin G-type, units Oda to Odg OS=Octopus vulgaris OX=6645 GN=LOC115211670 PE=4 SV=2 16596797 gb|AAK28276.2| hemocyanin G-type [Enteroctopus dofleini]	A0A6P7SER3; Cluster-58773.162316;orf1 len=2526 frame:3 start:24 end:7601 gi; A0A6P7SDC4; Cluster-58773.162319;orf1 len=2921 frame:3 start:24 end:8786 gi	hemocyanin 1-like OS=Octopus vulgaris OX=6645 GN=LOC115212215 PE=4 SV=2; 16596797 gb|AAK28276.2| hemocyanin G-type [Enteroctopus dofleini]; hemocyanin G-type, units Oda to Odg OS=Octopus vulgaris OX=6645 GN=LOC115211670 PE=4 SV=2; 16596797 gb|AAK28276.2| hemocyanin G-type [Enteroctopus dofleini]	0	3	3	0.6331	0	1	1	1	496.277	1486.82	1486.82	-0.7	-0.00035	0/0	0	0	88220.5	HCD (High Energy Collision Dissociation)	MS2	0	100	77.9909	14602	14602	14593	MCMMCM34021206.raw	F6	1339	2.78	3	0.0001881	1.14x10⁻⁴	1.389
High	Sequest HT	Sequest HT (A2)	A	2	Unambiguous	TNLQSETTQR	TNLQSETTQR		4	A0A7E6FJC7; A0A6P7TG59; A0A6P7TDP2	70 kDa neurofilament protein-like isoform X4 OS=Octopus vulgaris OX=6645 GN=LOC115222739 PE=3 SV=1 70 kDa neurofilament protein OS=Octopus vulgaris OX=6645 GN=LOC115222955 PE=3 SV=1 70 kDa neurofilament protein isoform X1 OS=Octopus vulgaris OX=6645 GN=LOC115222954 PE=3 SV=1	A0A7E6FJC7; A0A6P7TG59; A0A6P7TDP2; Cluster-58773.158910;orf1 len=512 frame:-1 start:1537 end:2 gi	70 kDa neurofilament protein-like isoform X4 OS=Octopus vulgaris OX=6645 GN=LOC115222739 PE=3 SV=1; 70 kDa neurofilament protein OS=Octopus vulgaris OX=6645 GN=LOC115222955 PE=3 SV=1; 70 kDa neurofilament protein isoform X1 OS=Octopus vulgaris OX=6645 GN=LOC115222954 PE=3 SV=1; 159741 gb|AAA16613.1| omega-crystallin [Enteroctopus dofleini]	0	2	2	0.5974	0	1	1	1	589.294	1177.58	1177.58	-0.75	-0.00044	0/0	0	0	235628	HCD (High Energy Collision Dissociation)	MS2	5.91609	100	19.6187	3575	3575	3572	MCMMCM34021207.raw	F7	1441	3.13	3	0.0001881	2.35x10⁻⁵	1.659
High	Sequest HT	Sequest HT (A2)	A	2	Unambiguous	IYGPDGKPHGPDGK	IYGPDGKPHGPDGK		38	A0A7E6F8D1	neuroblast differentiation-associated protein AHNAK isoform X37 OS=Octopus vulgaris OX=6645 GN=LOC115218249 PE=4 SV=1	A0A7E6F8D1; A0A7E6F8A2; A0A7E6F8A6; A0A6P7T0A6; A0A7E6F9S0; A0A7E6F8C0; A0A6P7T0F8; A0A7E6F8A7; A0A6P7SZQ0; A0A7E6F8B0; A0A7E6F8B7; A0A7E6F9R5; A0A7E6F9R0; A0A7E6FAM6; A0A7E6FAN6; A0A7E6F8C9; A0A6P7SZP6; A0A7E6F8B2; A0A7E6F9Q4; A0A7E6F8Z4; A0A7E6F8C3; A0A7E6F9P9; A0A7E6FAN1; A0A7E6FAP7; A0A6P7T1G0; A0A6P7T0B0; A0A7E6FAQ3; A0A7E6F900; A0A7E6F9P5; A0A7E6FAQ9; A0A7E6F8Y9; A0A7E6F8B5; A0A7E6F905; A0A…	neuroblast differentiation-associated protein AHNAK isoform X37 OS=Octopus vulgaris OX=6645 GN=LOC115218249 PE=4 SV=1; neuroblast differentiation-associated protein AHNAK isoform X4 OS=Octopus vulgaris OX=6645 GN=LOC115218249 PE=4 SV=1; uncharacterized protein LOC115218249 isoform X9 OS=Octopus vulgaris OX=6645 GN=LOC115218249 PE=4 SV=1; uncharacterized protein LOC115218249 isoform X18 OS=Octopus…	0	3	3	0.5863	0	1	1	1	479.909	1437.71	1437.71	-0.38	-0.00018	0/0	0	0	56030.7	HCD (High Energy Collision Dissociation)	MS2	25.4202	100	19.7546	3600	3600	3594	MCMMCM34021207.raw	F7	1351	2.78	1	0.0001881	1.41x10⁻⁴	1.353
High	Sequest HT	Sequest HT (A2)	A	2	Unambiguous	YTHFTTEVHSR	YTHFTTEVHSR		12	A0A6P7TDF6	unconventional myosin-VI isoform X4 OS=Octopus vulgaris OX=6645 GN=LOC115222880 PE=3 SV=1	A0A6P7TDF6; Cluster-58773.125326;orf1 len=1309 frame:3 start:33 end:3959 gi; A0A0L8HJI2; Cluster-58773.125337;orf1 len=1227 frame:3 start:201 end:3881 gi; A0A6P7TDB7; Cluster-58773.125332;orf1 len=1036 frame:3 start:201 end:3308 gi; Cluster-58773.125331;orf1 len=1288 frame:1 start:241 end:4104 gi; A0A7E6FJK7; Cluster-58773.125329;orf1 len=1173 frame:3 start:201 end:3719 gi; A0A6P7TJ32; Cluster-58…	unconventional myosin-VI isoform X4 OS=Octopus vulgaris OX=6645 GN=LOC115222880 PE=3 SV=1; 762115898 ref|XP_011440764.1| PREDICTED: unconventional myosin-VI-like isoform X2 [Crassostrea gigas]; Myosin motor domain-containing protein (Fragment) OS=Octopus bimaculoides OX=37653 GN=OCBIM_22013103mg PE=3 SV=1; 762115898 ref|XP_011440764.1| PREDICTED: unconventional myosin-VI-like isoform X2 [Crassost…	0	3	3	0.419	0	1	1	1	459.889	1377.65	1377.65	-1.07	-0.00049	0/0	0	0	42671.2	HCD (High Energy Collision Dissociation)	MS2	33.2013	100	20.403	3718	3718	3715	MCMMCM34021207.raw	F7	1039	1.79	1	0.0001881	7.49x10⁻⁴	1.069
High	Sequest HT	Sequest HT (A2)	A	2	Unambiguous	IDGKPLTENDR	IDGKPLTENDR		4	A0A6P7SI10; Cluster-58773.163438;orf1 len=994 frame:2 start:254 end:3235 gi	CD109 antigen isoform X2 OS=Octopus vulgaris OX=6645 GN=LOC115213260 PE=4 SV=1 410935705 gb|AFV94409.1| thioester-containing protein 1 [Euprymna scolopes]	A0A6P7SI10; A0A7E6F3R1; Cluster-58773.163438;orf1 len=994 frame:2 start:254 end:3235 gi; Cluster-58773.160937;orf1 len=552 frame:-3 start:1658 end:3 gi	CD109 antigen isoform X2 OS=Octopus vulgaris OX=6645 GN=LOC115213260 PE=4 SV=1; CD109 antigen isoform X1 OS=Octopus vulgaris OX=6645 GN=LOC115213260 PE=4 SV=1; 410935705 gb|AFV94409.1| thioester-containing protein 1 [Euprymna scolopes]; 410935705 gb|AFV94409.1| thioester-containing protein 1 [Euprymna scolopes]	0	3	3	0.4286	0	1	1	1	419.886	1257.64	1257.64	-0.36	-0.00015	0/0	0	0	60946.2	HCD (High Energy Collision Dissociation)	MS2	21.0437	100	20.3938	3716	3716	3715	MCMMCM34021207.raw	F7	1267	1.82	2	0.0001881	1.16x10⁻³	0.994
High	Sequest HT	Sequest HT (A2)	A	2	Unambiguous	GHDVIAQAQSGTGK	GHDVIAQAQSGTGK		4	A0A6P7TAK2	RNA helicase OS=Octopus vulgaris OX=6645 GN=LOC115222004 PE=3 SV=1	A0A6P7TAK2; A0A0L8GQT2; Cluster-58773.175050;orf1 len=358 frame:2 start:2 end:1075 gi; Cluster-58773.175048;orf1 len=130 frame:2 start:2 end:391 gi	RNA helicase OS=Octopus vulgaris OX=6645 GN=LOC115222004 PE=3 SV=1; RNA helicase OS=Octopus bimaculoides OX=37653 GN=OCBIM_22029859mg PE=3 SV=1; 675369149 gb|KFM62051.1| Eukaryotic initiation factor 4A-II, partial [Stegodyphus mimosarum]; 443713075 gb|ELU06082.1| hypothetical protein CAPTEDRAFT_157543 [Capitella teleta]	0	2	2	0.6056	0	1	1	1	684.847	1368.69	1368.69	0.54	0.00037	0/0	0	0	13368.2	HCD (High Energy Collision Dissociation)	MS2	56.1428	100	20.3702	3713	3713	3704	MCMMCM34021207.raw	F7	1237	1.42	1	0.0001881	2.65x10⁻³	0.853
High	Sequest HT	Sequest HT (A2)	A	2	Unambiguous	GHDVIAQAQSGTGK	GHDVIAQAQSGTGK		4	A0A6P7TAK2	RNA helicase OS=Octopus vulgaris OX=6645 GN=LOC115222004 PE=3 SV=1	A0A6P7TAK2; A0A0L8GQT2; Cluster-58773.175050;orf1 len=358 frame:2 start:2 end:1075 gi; Cluster-58773.175048;orf1 len=130 frame:2 start:2 end:391 gi	RNA helicase OS=Octopus vulgaris OX=6645 GN=LOC115222004 PE=3 SV=1; RNA helicase OS=Octopus bimaculoides OX=37653 GN=OCBIM_22029859mg PE=3 SV=1; 675369149 gb|KFM62051.1| Eukaryotic initiation factor 4A-II, partial [Stegodyphus mimosarum]; 443713075 gb|ELU06082.1| hypothetical protein CAPTEDRAFT_157543 [Capitella teleta]	0	3	3	0.4398	0	1	1	1	456.9	1368.69	1368.69	-0.59	-0.00027	0/0	0	0	60314.3	HCD (High Energy Collision Dissociation)	MS2	17.5142	100	20.338	3706	3706	3704	MCMMCM34021207.raw	F7	1250	2.41	1	0.0001881	1.45x10⁻⁴	1.349
High	Sequest HT	Sequest HT (A2)	A	2	Unambiguous	GKLNDPSGVAAR	GKLNDPSGVAAR		2	Cluster-58773.155036;orf1 len=454 frame:1 start:1 end:1362 gi	676495464 ref|XP_009066900.1| hypothetical protein LOTGIDRAFT_134745 [Lottia gigantea]>gi|556093743|gb|ESO82396.1| hypothetical protein LOTGIDRAFT_134745 [Lottia gigantea]	Cluster-58773.155036;orf1 len=454 frame:1 start:1 end:1362 gi; A0A6P7U0U0	676495464 ref|XP_009066900.1| hypothetical protein LOTGIDRAFT_134745 [Lottia gigantea]>gi|556093743|gb|ESO82396.1| hypothetical protein LOTGIDRAFT_134745 [Lottia gigantea]; collagen alpha-1(XII) chain OS=Octopus vulgaris OX=6645 GN=LOC115229655 PE=4 SV=2	1	3	3	0.4661	0	1	1	1	395.551	1184.64	1184.64	-1.02	-0.0004	0/0	0	0	70807	HCD (High Energy Collision Dissociation)	MS2	27.8641	100	20.3334	3705	3705	3704	MCMMCM34021207.raw	F7	1063	2.21	1	0.0001881	6.71x10⁻³	0.694
High	Sequest HT	Sequest HT (A2)	A	2	Unambiguous	FKRPEEIER	FKRPEEIER		1	A0A6P7STT4	Carboxylic ester hydrolase OS=Octopus vulgaris OX=6645 GN=LOC115216478 PE=3 SV=1	A0A6P7STT4	Carboxylic ester hydrolase OS=Octopus vulgaris OX=6645 GN=LOC115216478 PE=3 SV=1	1	3	3	0.5051	0	1	1	1	401.887	1203.65	1203.65	-0.25	-0.0001	0/0	0	0	42818.6	HCD (High Energy Collision Dissociation)	MS2	28.951	100	20.2289	3687	3687	3682	MCMMCM34021207.raw	F7	1686	1.98	1	0.0001881	1.15x10⁻²	0.601
High	Sequest HT	Sequest HT (A2)	A	2	Unambiguous	VTTDAHCDITANK	VTTDAHcDITANK	C7(Carbamidomethyl)	4	Cluster-58773.134277;orf1 len=292 frame:2 start:92 end:967 gi	402122771 gb|AFQ32467.1| CuZn superoxide dismutase [Mytilus galloprovincialis]	Cluster-58773.134278;orf1 len=257 frame:2 start:92 end:862 gi; Cluster-58773.134274;orf1 len=281 frame:2 start:92 end:934 gi; Cluster-58773.134277;orf1 len=292 frame:2 start:92 end:967 gi; Cluster-58773.134276;orf1 len=199 frame:-3 start:699 end:103 gi	402122771 gb|AFQ32467.1| CuZn superoxide dismutase [Mytilus galloprovincialis]; 402122771 gb|AFQ32467.1| CuZn superoxide dismutase [Mytilus galloprovincialis]; 402122771 gb|AFQ32467.1| CuZn superoxide dismutase [Mytilus galloprovincialis]; 402122771 gb|AFQ32467.1| CuZn superoxide dismutase [Mytilus galloprovincialis]	0	2	2	0.6086	0	1	1	1	723.339	1445.67	1445.67	1.39	0.001	0/0	0	0	359598	HCD (High Energy Collision Dissociation)	MS2	0	100	20.2105	3683	3683	3682	MCMMCM34021207.raw	F7	703	3.04	1	0.0001881	6.26x10⁻⁵	1.492
High	Sequest HT	Sequest HT (A2)	A	2	Unambiguous	VTTDAHCDITANK	VTTDAHcDITANK	C7(Carbamidomethyl)	4	Cluster-58773.134277;orf1 len=292 frame:2 start:92 end:967 gi	402122771 gb|AFQ32467.1| CuZn superoxide dismutase [Mytilus galloprovincialis]	Cluster-58773.134278;orf1 len=257 frame:2 start:92 end:862 gi; Cluster-58773.134274;orf1 len=281 frame:2 start:92 end:934 gi; Cluster-58773.134277;orf1 len=292 frame:2 start:92 end:967 gi; Cluster-58773.134276;orf1 len=199 frame:-3 start:699 end:103 gi	402122771 gb|AFQ32467.1| CuZn superoxide dismutase [Mytilus galloprovincialis]; 402122771 gb|AFQ32467.1| CuZn superoxide dismutase [Mytilus galloprovincialis]; 402122771 gb|AFQ32467.1| CuZn superoxide dismutase [Mytilus galloprovincialis]; 402122771 gb|AFQ32467.1| CuZn superoxide dismutase [Mytilus galloprovincialis]	0	3	3	0.5432	0	1	1	1	482.561	1445.67	1445.67	0.16	8e-05	0/0	0	0	356909	HCD (High Energy Collision Dissociation)	MS2	2.65769	100	20.1546	3673	3673	3671	MCMMCM34021207.raw	F7	663	3.24	1	0.0001881	3.28x10⁻⁵	1.602
High	Sequest HT	Sequest HT (A2)	A	2	Unambiguous	SVPGNMYSK	SVPGNmYSK	M6(Oxidation)	8	A0A6P7SI10; Cluster-58773.163468;orf1 len=382 frame:1 start:88 end:1233 gi	CD109 antigen isoform X2 OS=Octopus vulgaris OX=6645 GN=LOC115213260 PE=4 SV=1 410935705 gb|AFV94409.1| thioester-containing protein 1 [Euprymna scolopes]	Cluster-58773.163464;orf1 len=316 frame:-3 start:949 end:2 gi; A0A6P7SI10; Cluster-58773.163471;orf1 len=369 frame:1 start:1 end:1107 gi; A0A7E6F3R1; Cluster-58773.163469;orf1 len=381 frame:1 start:1 end:1143 gi; Cluster-58773.163466;orf1 len=279 frame:-2 start:838 end:2 gi; Cluster-58773.163468;orf1 len=382 frame:1 start:88 end:1233 gi; Cluster-58773.163467;orf1 len=340 frame:1 start:1 end:1020 …	410935705 gb|AFV94409.1| thioester-containing protein 1 [Euprymna scolopes]; CD109 antigen isoform X2 OS=Octopus vulgaris OX=6645 GN=LOC115213260 PE=4 SV=1; 410935705 gb|AFV94409.1| thioester-containing protein 1 [Euprymna scolopes]; CD109 antigen isoform X1 OS=Octopus vulgaris OX=6645 GN=LOC115213260 PE=4 SV=1; 410935705 gb|AFV94409.1| thioester-containing protein 1 [Euprymna scolopes]; 41093570…	0	2	2	0.3333	0	1	1	1	499.734	998.461	998.461	0.12	6e-05	0/0	0	0	277580	HCD (High Energy Collision Dissociation)	MS2	21.2992	100	19.6705	3584	3584	3583	MCMMCM34021207.raw	F7	477	1.65	2	0.0001881	8.75x10⁻³	0.648
High	Sequest HT	Sequest HT (A2)	A	2	Unambiguous	NIIHGSDGTESATR	NIIHGSDGTESATR		3	Cluster-58773.127031;orf1 len=154 frame:-3 start:549 end:88 gi	405978782 gb|EKC43144.1| Nucleoside diphosphate kinase B [Crassostrea gigas]	Cluster-58773.127031;orf1 len=154 frame:-3 start:549 end:88 gi; A0A6P7TQK0; Cluster-58773.127032;orf1 len=154 frame:1 start:67 end:528 gi	405978782 gb|EKC43144.1| Nucleoside diphosphate kinase B [Crassostrea gigas]; nucleoside diphosphate kinase OS=Octopus vulgaris OX=6645 GN=LOC115224833 PE=3 SV=1; 677288681 gb|KFP71109.1| Nucleoside diphosphate kinase, partial [Acanthisitta chloris]	0	2	2	0.6559	0	1	1	1	729.352	1457.7	1457.7	-0.17	-0.00012	0/0	0	0	61687.8	HCD (High Energy Collision Dissociation)	MS2	16.2803	100	20.0991	3663	3663	3660	MCMMCM34021207.raw	F7	960	1.86	1	0.0001881	4.92x10⁻³	0.747
High	Sequest HT	Sequest HT (A2)	A	2	Unambiguous	AASSEMTDEVHK	AASSEMTDEVHK		4	A0A6P7SI10; Cluster-58773.163438;orf1 len=994 frame:2 start:254 end:3235 gi	CD109 antigen isoform X2 OS=Octopus vulgaris OX=6645 GN=LOC115213260 PE=4 SV=1 410935705 gb|AFV94409.1| thioester-containing protein 1 [Euprymna scolopes]	A0A6P7SI10; A0A7E6F3R1; Cluster-58773.163438;orf1 len=994 frame:2 start:254 end:3235 gi; Cluster-58773.160937;orf1 len=552 frame:-3 start:1658 end:3 gi	CD109 antigen isoform X2 OS=Octopus vulgaris OX=6645 GN=LOC115213260 PE=4 SV=1; CD109 antigen isoform X1 OS=Octopus vulgaris OX=6645 GN=LOC115213260 PE=4 SV=1; 410935705 gb|AFV94409.1| thioester-containing protein 1 [Euprymna scolopes]; 410935705 gb|AFV94409.1| thioester-containing protein 1 [Euprymna scolopes]	0	3	3	0.5032	0	1	1	1	435.53	1304.58	1304.58	-1.7	-0.00074	0/0	0	0	109183	HCD (High Energy Collision Dissociation)	MS2	44.7687	100	20.0338	3651	3651	3649	MCMMCM34021207.raw	F7	358	1.55	2	0.0001881	4.86x10⁻³	0.75
High	Sequest HT	Sequest HT (A2)	A	2	Unambiguous	CQNSETNIDCSSR	cQNSETNIDcSSR	C1(Carbamidomethyl); C10(Carbamidomethyl)	6	A0A7E6EKW4	leucine-rich repeat and immunoglobulin-like domain-containing nogo receptor-interacting protein 1-B isoform X4 OS=Octopus vulgaris OX=6645 GN=LOC115230596 PE=4 SV=1	A0A7E6EKW4; A0A7E6EJT8; A0A7E6ELC3; A0A7E6EJY0; A0A7E6ELB8; A0A7E6EJ46	leucine-rich repeat and immunoglobulin-like domain-containing nogo receptor-interacting protein 1-B isoform X4 OS=Octopus vulgaris OX=6645 GN=LOC115230596 PE=4 SV=1; leucine-rich repeat and immunoglobulin-like domain-containing nogo receptor-interacting protein 1-B isoform X2 OS=Octopus vulgaris OX=6645 GN=LOC115230596 PE=4 SV=1; leucine-rich repeat and immunoglobulin-like domain-containing nogo …	0	2	2	0.7219	0	1	1	1	785.816	1570.62	1570.62	1.14	0.0009	0/0	0	0	56122.5	HCD (High Energy Collision Dissociation)	MS2	0	100	19.9273	3632	3632	3627	MCMMCM34021207.raw	F7	100	1.51	1	0.0001881	2.25x10⁻²	0.485
High	Sequest HT	Sequest HT (A2)	A	2	Unambiguous	SQDELTDCKNEENTTK	SQDELTDcKNEENTTK	C8(Carbamidomethyl)	2	A0A0L8H9X2	RING-type domain-containing protein OS=Octopus bimaculoides OX=37653 GN=OCBIM_22019410mg PE=4 SV=1	Cluster-58773.34336;orf1 len=489 frame:3 start:225 end:1691 gi; A0A0L8H9X2	871273859 ref|XP_005112056.2| PREDICTED: uncharacterized protein LOC101851691 [Aplysia californica]; RING-type domain-containing protein OS=Octopus bimaculoides OX=37653 GN=OCBIM_22019410mg PE=4 SV=1	1	3	3	0.6293	0	1	1	1	637.948	1911.83	1911.82	2.34	0.00149	0/0	0	0	132979	HCD (High Energy Collision Dissociation)	MS2	3.65762	100	19.909	3628	3628	3627	MCMMCM34021207.raw	F7	331	3.21	1	0.0001881	9.23x10⁻⁶	1.818
High	Sequest HT	Sequest HT (A2)	A	2	Unambiguous	AASSEMTDEVHK	AASSEmTDEVHK	M6(Oxidation)	4	A0A6P7SI10; Cluster-58773.163438;orf1 len=994 frame:2 start:254 end:3235 gi	CD109 antigen isoform X2 OS=Octopus vulgaris OX=6645 GN=LOC115213260 PE=4 SV=1 410935705 gb|AFV94409.1| thioester-containing protein 1 [Euprymna scolopes]	A0A6P7SI10; A0A7E6F3R1; Cluster-58773.163438;orf1 len=994 frame:2 start:254 end:3235 gi; Cluster-58773.160937;orf1 len=552 frame:-3 start:1658 end:3 gi	CD109 antigen isoform X2 OS=Octopus vulgaris OX=6645 GN=LOC115213260 PE=4 SV=1; CD109 antigen isoform X1 OS=Octopus vulgaris OX=6645 GN=LOC115213260 PE=4 SV=1; 410935705 gb|AFV94409.1| thioester-containing protein 1 [Euprymna scolopes]; 410935705 gb|AFV94409.1| thioester-containing protein 1 [Euprymna scolopes]	0	2	2	0.5488	0	1	1	1	660.791	1320.57	1320.57	0.9	0.00059	0/0	0	0	103936	HCD (High Energy Collision Dissociation)	MS2	7.7827	100	19.8671	3621	3621	3616	MCMMCM34021207.raw	F7	343	2.15	2	0.0001881	5.57x10⁻³	0.726
High	Sequest HT	Sequest HT (A2)	A	2	Unambiguous	RPKPTQEVAAVAAK	RPKPTQEVAAVAAK		4	A0A0L8FU26	Uncharacterized protein OS=Octopus bimaculoides OX=37653 GN=OCBIM_22007935mg PE=4 SV=1	A0A0L8FU26; A0A6P7S8P2; A0A0L8FU76; Cluster-58773.138646;orf1 len=790 frame:3 start:30 end:2399 gi	Uncharacterized protein OS=Octopus bimaculoides OX=37653 GN=OCBIM_22007935mg PE=4 SV=1; 40S ribosomal protein S6 OS=Octopus vulgaris OX=6645 GN=LOC115210314 PE=3 SV=1; 40S ribosomal protein S6 OS=Octopus bimaculoides OX=37653 GN=OCBIM_22007935mg PE=3 SV=1; 117067150 gb|ABK32076.1| ribosomal protein S6 [Branchiostoma belcheri]	0	3	3	0.5714	0	1	1	1	489.288	1465.85	1465.85	-0.08	-4e-05	0/0	0	0	236933	HCD (High Energy Collision Dissociation)	MS2	24.6144	100	19.8071	3610	3610	3605	MCMMCM34021207.raw	F7	482	4.55	1	0.0001881	5.42x10⁻⁶	1.909
High	Sequest HT	Sequest HT (A2)	A	2	Unambiguous	AASSEMTDEVHK	AASSEMTDEVHK		4	A0A6P7SI10; Cluster-58773.163438;orf1 len=994 frame:2 start:254 end:3235 gi	CD109 antigen isoform X2 OS=Octopus vulgaris OX=6645 GN=LOC115213260 PE=4 SV=1 410935705 gb|AFV94409.1| thioester-containing protein 1 [Euprymna scolopes]	A0A6P7SI10; A0A7E6F3R1; Cluster-58773.163438;orf1 len=994 frame:2 start:254 end:3235 gi; Cluster-58773.160937;orf1 len=552 frame:-3 start:1658 end:3 gi	CD109 antigen isoform X2 OS=Octopus vulgaris OX=6645 GN=LOC115213260 PE=4 SV=1; CD109 antigen isoform X1 OS=Octopus vulgaris OX=6645 GN=LOC115213260 PE=4 SV=1; 410935705 gb|AFV94409.1| thioester-containing protein 1 [Euprymna scolopes]; 410935705 gb|AFV94409.1| thioester-containing protein 1 [Euprymna scolopes]	0	2	2	0.6508	0	1	1	1	652.795	1304.58	1304.58	2.36	0.00154	0/0	0	0	1.21318e+06	HCD (High Energy Collision Dissociation)	MS2	0.204769	54.226	19.7948	3607	3607	3605	MCMMCM34021207.raw	F7	442	3.58	2	0.0001881	7.12x10⁻⁵	1.47
High	Sequest HT	Sequest HT (A2)	A	2	Unambiguous	AASSEMTDEVHK	AASSEMTDEVHK		4	A0A6P7SI10; Cluster-58773.163438;orf1 len=994 frame:2 start:254 end:3235 gi	CD109 antigen isoform X2 OS=Octopus vulgaris OX=6645 GN=LOC115213260 PE=4 SV=1 410935705 gb|AFV94409.1| thioester-containing protein 1 [Euprymna scolopes]	A0A6P7SI10; A0A7E6F3R1; Cluster-58773.163438;orf1 len=994 frame:2 start:254 end:3235 gi; Cluster-58773.160937;orf1 len=552 frame:-3 start:1658 end:3 gi	CD109 antigen isoform X2 OS=Octopus vulgaris OX=6645 GN=LOC115213260 PE=4 SV=1; CD109 antigen isoform X1 OS=Octopus vulgaris OX=6645 GN=LOC115213260 PE=4 SV=1; 410935705 gb|AFV94409.1| thioester-containing protein 1 [Euprymna scolopes]; 410935705 gb|AFV94409.1| thioester-containing protein 1 [Euprymna scolopes]	0	3	3	0.478	0	1	1	1	435.532	1304.58	1304.58	1.35	0.00059	0/0	0	0	5.67155e+06	HCD (High Energy Collision Dissociation)	MS2	0.263233	7.332	19.792	3606	3606	3605	MCMMCM34021207.raw	F7	397	2.95	2	0.0001881	6.47x10⁻⁴	1.094
High	Sequest HT	Sequest HT (A2)	A	2	Unambiguous	ELSGRDENADEIKR	ELSGRDENADEIKR		12	A0A812CYT6; A0A6P7TER7	MYH OS=Sepia pharaonis OX=158019 GN=SPHA_42230 PE=3 SV=1 myosin heavy chain, non-muscle isoform X3 OS=Octopus vulgaris OX=6645 GN=LOC115222368 PE=3 SV=1	A0A812CYT6; A0A6P7TER7; A0A6P7TBM5; A0A6P7TBL9; Cluster-58773.161969;orf1 len=1721 frame:3 start:3216 end:8378 gi; A0A6P7TBS7; A0A812CRT1; Q8SWQ7; A0A6P7TDQ3; A0A812CRS6; A0A6P7TBP7; A0A0L8FXW0	MYH OS=Sepia pharaonis OX=158019 GN=SPHA_42230 PE=3 SV=1; myosin heavy chain, non-muscle isoform X3 OS=Octopus vulgaris OX=6645 GN=LOC115222368 PE=3 SV=1; myosin heavy chain, non-muscle isoform X2 OS=Octopus vulgaris OX=6645 GN=LOC115222368 PE=3 SV=1; myosin heavy chain, non-muscle isoform X1 OS=Octopus vulgaris OX=6645 GN=LOC115222368 PE=3 SV=1; 19879404 gb|AAK85118.1| non-muscle myosin II heavy…	2	3	3	0.4286	0	1	1	1	544.605	1631.8	1631.8	0.86	0.00047	0/0	0	0	50096	HCD (High Energy Collision Dissociation)	MS2	9.62522	100	19.7591	3601	3601	3594	MCMMCM34021207.raw	F7	1223	1.89	2	0.0001881	1.48x10⁻²	0.558
High	Sequest HT	Sequest HT (A2)	A	2	Unambiguous	NIIHGSDGTESATR	NIIHGSDGTESATR		3	Cluster-58773.127031;orf1 len=154 frame:-3 start:549 end:88 gi	405978782 gb|EKC43144.1| Nucleoside diphosphate kinase B [Crassostrea gigas]	Cluster-58773.127031;orf1 len=154 frame:-3 start:549 end:88 gi; A0A6P7TQK0; Cluster-58773.127032;orf1 len=154 frame:1 start:67 end:528 gi	405978782 gb|EKC43144.1| Nucleoside diphosphate kinase B [Crassostrea gigas]; nucleoside diphosphate kinase OS=Octopus vulgaris OX=6645 GN=LOC115224833 PE=3 SV=1; 677288681 gb|KFP71109.1| Nucleoside diphosphate kinase, partial [Acanthisitta chloris]	0	3	3	0.6319	0	1	1	1	486.57	1457.7	1457.7	-0.76	-0.00037	0/0	0	0	750414	HCD (High Energy Collision Dissociation)	MS2	2.606	60.188	20.0907	3661	3661	3660	MCMMCM34021207.raw	F7	967	3.83	1	0.0001881	6.92x10⁻⁶	1.867
High	Sequest HT	Sequest HT (A2)	A	2	Unambiguous	RDVSSLTHADMNTLRK	RDVSSLTHADMNTLRK		4	A0A6P7SER3; A0A6P7SDC4; Cluster-58773.162319;orf1 len=2921 frame:3 start:24 end:8786 gi	hemocyanin 1-like OS=Octopus vulgaris OX=6645 GN=LOC115212215 PE=4 SV=2 hemocyanin G-type, units Oda to Odg OS=Octopus vulgaris OX=6645 GN=LOC115211670 PE=4 SV=2 16596797 gb|AAK28276.2| hemocyanin G-type [Enteroctopus dofleini]	A0A6P7SER3; Cluster-58773.162316;orf1 len=2526 frame:3 start:24 end:7601 gi; A0A6P7SDC4; Cluster-58773.162319;orf1 len=2921 frame:3 start:24 end:8786 gi	hemocyanin 1-like OS=Octopus vulgaris OX=6645 GN=LOC115212215 PE=4 SV=2; 16596797 gb|AAK28276.2| hemocyanin G-type [Enteroctopus dofleini]; hemocyanin G-type, units Oda to Odg OS=Octopus vulgaris OX=6645 GN=LOC115211670 PE=4 SV=2; 16596797 gb|AAK28276.2| hemocyanin G-type [Enteroctopus dofleini]	2	4	4	0.5569	0	1	1	1	461.741	1843.94	1843.94	-1.13	-0.00052	0/0	0	0	7229715	HCD (High Energy Collision Dissociation)	MS2	4.39627	4.728	29.2746	5367	5367	5365	MCMMCM34021207.raw	F7	1359	5.71	3	0.0001881	7.74x10⁻⁶	1.848
High	Sequest HT	Sequest HT (A2)	A	2	Unambiguous	SFFPETWIWTEGEADESGNVHIAAK	SFFPETWIWTEGEADESGNVHIAAK		4	A0A6P7SI10; Cluster-58773.163438;orf1 len=994 frame:2 start:254 end:3235 gi	CD109 antigen isoform X2 OS=Octopus vulgaris OX=6645 GN=LOC115213260 PE=4 SV=1 410935705 gb|AFV94409.1| thioester-containing protein 1 [Euprymna scolopes]	A0A6P7SI10; A0A7E6F3R1; Cluster-58773.163438;orf1 len=994 frame:2 start:254 end:3235 gi; Cluster-58773.160937;orf1 len=552 frame:-3 start:1658 end:3 gi	CD109 antigen isoform X2 OS=Octopus vulgaris OX=6645 GN=LOC115213260 PE=4 SV=1; CD109 antigen isoform X1 OS=Octopus vulgaris OX=6645 GN=LOC115213260 PE=4 SV=1; 410935705 gb|AFV94409.1| thioester-containing protein 1 [Euprymna scolopes]; 410935705 gb|AFV94409.1| thioester-containing protein 1 [Euprymna scolopes]	0	3	3	0.4084	0	1	1	1	941.11	2821.32	2821.31	1.75	0.00165	0/0	0	0	169558	HCD (High Energy Collision Dissociation)	MS2	30.8327	100	77.9723	14598	14598	14593	MCMMCM34021206.raw	F6	922	2.62	2	0.0001881	4.46x10⁻⁶	1.942
High	Sequest HT	Sequest HT (A2)	A	2	Unambiguous	SVETLTEDEVLNLQVALR	SVETLTEDEVLNLQVALR		4	A0A6P7SER3; A0A6P7SDC4; Cluster-58773.162319;orf1 len=2921 frame:3 start:24 end:8786 gi	hemocyanin 1-like OS=Octopus vulgaris OX=6645 GN=LOC115212215 PE=4 SV=2 hemocyanin G-type, units Oda to Odg OS=Octopus vulgaris OX=6645 GN=LOC115211670 PE=4 SV=2 16596797 gb|AAK28276.2| hemocyanin G-type [Enteroctopus dofleini]	A0A6P7SER3; Cluster-58773.162316;orf1 len=2526 frame:3 start:24 end:7601 gi; A0A6P7SDC4; Cluster-58773.162319;orf1 len=2921 frame:3 start:24 end:8786 gi	hemocyanin 1-like OS=Octopus vulgaris OX=6645 GN=LOC115212215 PE=4 SV=2; 16596797 gb|AAK28276.2| hemocyanin G-type [Enteroctopus dofleini]; hemocyanin G-type, units Oda to Odg OS=Octopus vulgaris OX=6645 GN=LOC115211670 PE=4 SV=2; 16596797 gb|AAK28276.2| hemocyanin G-type [Enteroctopus dofleini]	0	3	3	0.6991	0	1	1	1	677.033	2029.08	2029.08	1.13	0.00077	0/0	0	0	270274	HCD (High Energy Collision Dissociation)	MS2	13.5107	100	77.9539	14594	14594	14593	MCMMCM34021206.raw	F6	1130	4.22	3	0.0001881	6.23x10⁻⁸	2.67
High	Sequest HT	Sequest HT (A2)	A	2	Unambiguous	LTSEEADQLLQGVEDSHGNVNYEELIR	LTSEEADQLLQGVEDSHGNVNYEELIR		4	A0A6P7SU30	myosin-2 essential light chain isoform X2 OS=Octopus vulgaris OX=6645 GN=LOC115216469 PE=4 SV=1	Cluster-58773.186489;orf1 len=185 frame:2 start:218 end:772 gi; A0A0L8HS39; A0A6P7SU30; A0A6P7STT8	405972312 gb|EKC37087.1| Myosin-2 essential light chain [Crassostrea gigas]; Uncharacterized protein OS=Octopus bimaculoides OX=37653 GN=OCBIM_22007563mg PE=4 SV=1; myosin-2 essential light chain isoform X2 OS=Octopus vulgaris OX=6645 GN=LOC115216469 PE=4 SV=1; myosin-2 essential light chain isoform X1 OS=Octopus vulgaris OX=6645 GN=LOC115216469 PE=4 SV=1	0	3	3	0.746	0	1	1	1	1020.16	3058.46	3058.46	0.3	0.00031	0/0	0	0	1.50328e+06	HCD (High Energy Collision Dissociation)	MS2	1.17543	16.893	67.3288	12740	12740	12736	MCMMCM34021206.raw	F6	1107	5.63	1	0.0001881	4.86x10⁻¹⁰	3.497
High	Sequest HT	Sequest HT (A2)	A	2	Unambiguous	DPHSMSSLDFTAYDPIFFLHHSNVDR	DPHSMSSLDFTAYDPIFFLHHSNVDR		1	A0A0L8FFZ3	Tyrosinase_Cu-bd domain-containing protein (Fragment) OS=Octopus bimaculoides OX=37653 GN=OCBIM_22022789mg PE=4 SV=1	A0A0L8FFZ3	Tyrosinase_Cu-bd domain-containing protein (Fragment) OS=Octopus bimaculoides OX=37653 GN=OCBIM_22022789mg PE=4 SV=1	0	4	4	0.5074	0	1	1	1	762.854	3048.4	3048.39	0.21	0.00016	0/0	0	0	307094	HCD (High Energy Collision Dissociation)	MS2	35.4644	57.471	67.2899	12732	12732	12725	MCMMCM34021206.raw	F6	762	4.06	1	0.0001881	2.09x10⁻⁵	1.679
High	Sequest HT	Sequest HT (A2)	A	2	Unambiguous	EETYLDENGEAHPNPFFSGVIDEAGAQTTR	EETYLDENGEAHPNPFFSGVIDEAGAQTTR		4	A0A6P7SER3; A0A6P7SDC4; Cluster-58773.162319;orf1 len=2921 frame:3 start:24 end:8786 gi	hemocyanin 1-like OS=Octopus vulgaris OX=6645 GN=LOC115212215 PE=4 SV=2 hemocyanin G-type, units Oda to Odg OS=Octopus vulgaris OX=6645 GN=LOC115211670 PE=4 SV=2 16596797 gb|AAK28276.2| hemocyanin G-type [Enteroctopus dofleini]	A0A6P7SER3; Cluster-58773.162316;orf1 len=2526 frame:3 start:24 end:7601 gi; A0A6P7SDC4; Cluster-58773.162319;orf1 len=2921 frame:3 start:24 end:8786 gi	hemocyanin 1-like OS=Octopus vulgaris OX=6645 GN=LOC115212215 PE=4 SV=2; 16596797 gb|AAK28276.2| hemocyanin G-type [Enteroctopus dofleini]; hemocyanin G-type, units Oda to Odg OS=Octopus vulgaris OX=6645 GN=LOC115211670 PE=4 SV=2; 16596797 gb|AAK28276.2| hemocyanin G-type [Enteroctopus dofleini]	0	3	3	0.6045	0	1	1	1	1098.83	3294.48	3294.48	-0.1	-0.00011	0/0	0	0	458985	HCD (High Energy Collision Dissociation)	MS2	0	53.075	67.2785	12729	12729	12725	MCMMCM34021206.raw	F6	578	4.45	3	0.0001881	1.34x10⁻⁸	2.932
High	Sequest HT	Sequest HT (A2)	A	2	Unambiguous	TSANVDITVDSAGNTYNAGSITILGGSK	TSANVDITVDSAGNTYNAGSITILGGSK		4	A0A6P7SER3; A0A6P7SDC4; Cluster-58773.162319;orf1 len=2921 frame:3 start:24 end:8786 gi	hemocyanin 1-like OS=Octopus vulgaris OX=6645 GN=LOC115212215 PE=4 SV=2 hemocyanin G-type, units Oda to Odg OS=Octopus vulgaris OX=6645 GN=LOC115211670 PE=4 SV=2 16596797 gb|AAK28276.2| hemocyanin G-type [Enteroctopus dofleini]	A0A6P7SER3; Cluster-58773.162316;orf1 len=2526 frame:3 start:24 end:7601 gi; A0A6P7SDC4; Cluster-58773.162319;orf1 len=2921 frame:3 start:24 end:8786 gi	hemocyanin 1-like OS=Octopus vulgaris OX=6645 GN=LOC115212215 PE=4 SV=2; 16596797 gb|AAK28276.2| hemocyanin G-type [Enteroctopus dofleini]; hemocyanin G-type, units Oda to Odg OS=Octopus vulgaris OX=6645 GN=LOC115211670 PE=4 SV=2; 16596797 gb|AAK28276.2| hemocyanin G-type [Enteroctopus dofleini]	0	2	2	0.6667	0	1	1	1	1363.68	2726.35	2726.35	1.53	0.00208	0/0	0	0	303293	HCD (High Energy Collision Dissociation)	MS2	27.4096	100	67.2264	12719	12719	12714	MCMMCM34021206.raw	F6	1383	3.78	3	0.0001881	3.71x10⁻⁸	2.758
High	Sequest HT	Sequest HT (A2)	A	2	Unambiguous	HAVPTEVYDYQSDLHYTYDTLFFGGMSVR	HAVPTEVYDYQSDLHYTYDTLFFGGmSVR	M26(Oxidation)	4	A0A6P7SER3; A0A6P7SDC4; Cluster-58773.162319;orf1 len=2921 frame:3 start:24 end:8786 gi	hemocyanin 1-like OS=Octopus vulgaris OX=6645 GN=LOC115212215 PE=4 SV=2 hemocyanin G-type, units Oda to Odg OS=Octopus vulgaris OX=6645 GN=LOC115211670 PE=4 SV=2 16596797 gb|AAK28276.2| hemocyanin G-type [Enteroctopus dofleini]	A0A6P7SER3; Cluster-58773.162316;orf1 len=2526 frame:3 start:24 end:7601 gi; A0A6P7SDC4; Cluster-58773.162319;orf1 len=2921 frame:3 start:24 end:8786 gi	hemocyanin 1-like OS=Octopus vulgaris OX=6645 GN=LOC115212215 PE=4 SV=2; 16596797 gb|AAK28276.2| hemocyanin G-type [Enteroctopus dofleini]; hemocyanin G-type, units Oda to Odg OS=Octopus vulgaris OX=6645 GN=LOC115211670 PE=4 SV=2; 16596797 gb|AAK28276.2| hemocyanin G-type [Enteroctopus dofleini]	0	3	3	0.3772	0	1	1	1	1143.19	3427.56	3427.56	1.16	0.00132	0/0	0	0	459325	HCD (High Energy Collision Dissociation)	MS2	0	40.684	67.2229	12718	12718	12714	MCMMCM34021206.raw	F6	659	1.67	3	0.0001881	5.67x10⁻³	0.723
High	Sequest HT	Sequest HT (A2)	A	2	Unambiguous	HAVPTEVYDYQSDLHYTYDTLFFGGMSVR	HAVPTEVYDYQSDLHYTYDTLFFGGmSVR	M26(Oxidation)	4	A0A6P7SER3; A0A6P7SDC4; Cluster-58773.162319;orf1 len=2921 frame:3 start:24 end:8786 gi	hemocyanin 1-like OS=Octopus vulgaris OX=6645 GN=LOC115212215 PE=4 SV=2 hemocyanin G-type, units Oda to Odg OS=Octopus vulgaris OX=6645 GN=LOC115211670 PE=4 SV=2 16596797 gb|AAK28276.2| hemocyanin G-type [Enteroctopus dofleini]	A0A6P7SER3; Cluster-58773.162316;orf1 len=2526 frame:3 start:24 end:7601 gi; A0A6P7SDC4; Cluster-58773.162319;orf1 len=2921 frame:3 start:24 end:8786 gi	hemocyanin 1-like OS=Octopus vulgaris OX=6645 GN=LOC115212215 PE=4 SV=2; 16596797 gb|AAK28276.2| hemocyanin G-type [Enteroctopus dofleini]; hemocyanin G-type, units Oda to Odg OS=Octopus vulgaris OX=6645 GN=LOC115211670 PE=4 SV=2; 16596797 gb|AAK28276.2| hemocyanin G-type [Enteroctopus dofleini]	0	4	4	0.4438	0	1	1	1	857.645	3427.56	3427.56	0.67	0.00057	0/0	0	0	302395	HCD (High Energy Collision Dissociation)	MS2	25.3787	68.444	67.1731	12708	12708	12703	MCMMCM34021206.raw	F6	652	3.56	3	0.0001881	5.61x10⁻⁶	1.903
High	Sequest HT	Sequest HT (A2)	A	2	Unambiguous	LISFYGLTDLK	LISFYGLTDLK		1	A0A6P7T161	uncharacterized protein LOC115218089 OS=Octopus vulgaris OX=6645 GN=LOC115218089 PE=4 SV=1	A0A6P7T161	uncharacterized protein LOC115218089 OS=Octopus vulgaris OX=6645 GN=LOC115218089 PE=4 SV=1	0	2	2	0.5125	0	1	1	1	635.358	1269.71	1269.71	0.13	8e-05	0/0	0	0	1.63212e+06	HCD (High Energy Collision Dissociation)	MS2	5.47713	40.076	67.1661	12706	12706	12703	MCMMCM34021206.raw	F6	918	2.79	1	0.0001881	3.16x10⁻⁴	1.216
High	Sequest HT	Sequest HT (A2)	A	2	Unambiguous	TIGQSADVNFDICTK	TIGQSADVNFDIcTK	C13(Carbamidomethyl)	4	A0A0L8GNM6; A0A6P7SER3; A0A6P7SDC4; Cluster-58773.162319;orf1 len=2921 frame:3 start:24 end:8786 gi	Uncharacterized protein OS=Octopus bimaculoides OX=37653 GN=OCBIM_22031096mg PE=4 SV=1 hemocyanin 1-like OS=Octopus vulgaris OX=6645 GN=LOC115212215 PE=4 SV=2 hemocyanin G-type, units Oda to Odg OS=Octopus vulgaris OX=6645 GN=LOC115211670 PE=4 SV=2 16596797 gb|AAK28276.2| hemocyanin G-type [Enteroctopus dofleini]	A0A0L8GNM6; A0A6P7SER3; A0A6P7SDC4; Cluster-58773.162319;orf1 len=2921 frame:3 start:24 end:8786 gi	Uncharacterized protein OS=Octopus bimaculoides OX=37653 GN=OCBIM_22031096mg PE=4 SV=1; hemocyanin 1-like OS=Octopus vulgaris OX=6645 GN=LOC115212215 PE=4 SV=2; hemocyanin G-type, units Oda to Odg OS=Octopus vulgaris OX=6645 GN=LOC115211670 PE=4 SV=2; 16596797 gb|AAK28276.2| hemocyanin G-type [Enteroctopus dofleini]	0	2	2	0.6764	0	1	1	1	834.899	1668.79	1668.79	0.15	0.00012	0/0	0	0	684445	HCD (High Energy Collision Dissociation)	MS2	19.5179	100	67.1243	12698	12698	12692	MCMMCM34021206.raw	F6	1049	3.43	4	0.0001881	1.23x10⁻⁶	2.161
High	Sequest HT	Sequest HT (A2)	A	2	Unambiguous	GHYTEGAELVDSVLDVVR	GHYTEGAELVDSVLDVVR		8	A0A0L8GJ55	Tubulin beta chain OS=Octopus bimaculoides OX=37653 GN=OCBIM_22032594mg PE=3 SV=1	Cluster-92874.0;orf1 len=256 frame:-3 start:770 end:3 gi; Cluster-789.0;orf1 len=449 frame:3 start:39 end:1385 gi; A0A812DI02; Cluster-58773.183706;orf1 len=247 frame:-2 start:742 end:2 gi; Cluster-92874.1;orf2 len=367 frame:2 start:2 end:1102 gi; Cluster-58773.183707;orf1 len=449 frame:1 start:586 end:1932 gi; A4D0I1; A0A0L8GJ55	634865305 ref|XP_007945164.1| PREDICTED: tubulin beta-4B chain isoform X1 [Orycteropus afer afer]; 158534557 gb|ABW72037.1| beta-tubulin [Artemia franciscana]; Tubulin beta chain OS=Sepia pharaonis OX=158019 GN=SPHA_52176 PE=3 SV=1; 51860821 gb|AAU11524.1| beta-tubulin [Doryteuthis pealeii]; 634865305 ref|XP_007945164.1| PREDICTED: tubulin beta-4B chain isoform X1 [Orycteropus afer afer]; 6764514…	0	3	3	0.7205	0	1	1	1	653.665	1958.98	1958.98	-0.71	-0.00047	0/0	0	0	301935	HCD (High Energy Collision Dissociation)	MS2	19.0843	100	67.3936	12755	12755	12747	MCMMCM34021206.raw	F6	1358	4.15	1	0.0001881	1.32x10⁻⁶	2.15
High	Sequest HT	Sequest HT (A2)	A	2	Unambiguous	LFVVQFEQALHR	LFVVQFEQALHR		4	A0A6P7SER3; A0A6P7SDC4; Cluster-58773.162319;orf1 len=2921 frame:3 start:24 end:8786 gi	hemocyanin 1-like OS=Octopus vulgaris OX=6645 GN=LOC115212215 PE=4 SV=2 hemocyanin G-type, units Oda to Odg OS=Octopus vulgaris OX=6645 GN=LOC115211670 PE=4 SV=2 16596797 gb|AAK28276.2| hemocyanin G-type [Enteroctopus dofleini]	A0A6P7SER3; Cluster-58773.162316;orf1 len=2526 frame:3 start:24 end:7601 gi; A0A6P7SDC4; Cluster-58773.162319;orf1 len=2921 frame:3 start:24 end:8786 gi	hemocyanin 1-like OS=Octopus vulgaris OX=6645 GN=LOC115212215 PE=4 SV=2; 16596797 gb|AAK28276.2| hemocyanin G-type [Enteroctopus dofleini]; hemocyanin G-type, units Oda to Odg OS=Octopus vulgaris OX=6645 GN=LOC115211670 PE=4 SV=2; 16596797 gb|AAK28276.2| hemocyanin G-type [Enteroctopus dofleini]	0	3	3	0.5957	0	1	1	1	496.277	1486.82	1486.82	-0.06	-3e-05	0/0	0	0	180950	HCD (High Energy Collision Dissociation)	MS2	4.26097	100	66.97	12669	12669	12659	MCMMCM34021206.raw	F6	1248	3.29	3	0.0001881	1.74x10⁻⁴	1.318
High	Sequest HT	Sequest HT (A2)	A	2	Unambiguous	AGEFYVLGSANEMPWK	AGEFYVLGSANEMPWK		4	A0A6P7SER3; A0A6P7SDC4; Cluster-58773.162319;orf1 len=2921 frame:3 start:24 end:8786 gi	hemocyanin 1-like OS=Octopus vulgaris OX=6645 GN=LOC115212215 PE=4 SV=2 hemocyanin G-type, units Oda to Odg OS=Octopus vulgaris OX=6645 GN=LOC115211670 PE=4 SV=2 16596797 gb|AAK28276.2| hemocyanin G-type [Enteroctopus dofleini]	A0A6P7SER3; Cluster-58773.162316;orf1 len=2526 frame:3 start:24 end:7601 gi; A0A6P7SDC4; Cluster-58773.162319;orf1 len=2921 frame:3 start:24 end:8786 gi	hemocyanin 1-like OS=Octopus vulgaris OX=6645 GN=LOC115212215 PE=4 SV=2; 16596797 gb|AAK28276.2| hemocyanin G-type [Enteroctopus dofleini]; hemocyanin G-type, units Oda to Odg OS=Octopus vulgaris OX=6645 GN=LOC115211670 PE=4 SV=2; 16596797 gb|AAK28276.2| hemocyanin G-type [Enteroctopus dofleini]	0	2	2	0.6612	0	1	1	1	899.928	1798.85	1798.85	1.08	0.00098	0/0	0	0	1484833	HCD (High Energy Collision Dissociation)	MS2	0.910281	29.522	66.8712	12649	12649	12648	MCMMCM34021206.raw	F6	1034	3.69	3	0.0001881	4.52x10⁻⁶	1.94
High	Sequest HT	Sequest HT (A2)	A	2	Unambiguous	NVFYSGDIAFEQK	NVFYSGDIAFEQK		4	A0A6P7SER3; A0A6P7SDC4; Cluster-58773.162319;orf1 len=2921 frame:3 start:24 end:8786 gi	hemocyanin 1-like OS=Octopus vulgaris OX=6645 GN=LOC115212215 PE=4 SV=2 hemocyanin G-type, units Oda to Odg OS=Octopus vulgaris OX=6645 GN=LOC115211670 PE=4 SV=2 16596797 gb|AAK28276.2| hemocyanin G-type [Enteroctopus dofleini]	A0A6P7SER3; Cluster-58773.162316;orf1 len=2526 frame:3 start:24 end:7601 gi; A0A6P7SDC4; Cluster-58773.162319;orf1 len=2921 frame:3 start:24 end:8786 gi	hemocyanin 1-like OS=Octopus vulgaris OX=6645 GN=LOC115212215 PE=4 SV=2; 16596797 gb|AAK28276.2| hemocyanin G-type [Enteroctopus dofleini]; hemocyanin G-type, units Oda to Odg OS=Octopus vulgaris OX=6645 GN=LOC115211670 PE=4 SV=2; 16596797 gb|AAK28276.2| hemocyanin G-type [Enteroctopus dofleini]	0	2	2	0.4518	0	1	1	1	759.367	1517.73	1517.73	0.07	5e-05	0/0	0	0	224240	HCD (High Energy Collision Dissociation)	MS2	35.3254	100	66.7709	12631	12631	12626	MCMMCM34021206.raw	F6	1077	1.66	3	0.0001881	1.46x10⁻²	0.56
High	Sequest HT	Sequest HT (A2)	A	2	Unambiguous	KSVETLTEDEVLNLQVALR	KSVETLTEDEVLNLQVALR		4	A0A6P7SER3; A0A6P7SDC4; Cluster-58773.162319;orf1 len=2921 frame:3 start:24 end:8786 gi	hemocyanin 1-like OS=Octopus vulgaris OX=6645 GN=LOC115212215 PE=4 SV=2 hemocyanin G-type, units Oda to Odg OS=Octopus vulgaris OX=6645 GN=LOC115211670 PE=4 SV=2 16596797 gb|AAK28276.2| hemocyanin G-type [Enteroctopus dofleini]	A0A6P7SER3; Cluster-58773.162316;orf1 len=2526 frame:3 start:24 end:7601 gi; A0A6P7SDC4; Cluster-58773.162319;orf1 len=2921 frame:3 start:24 end:8786 gi	hemocyanin 1-like OS=Octopus vulgaris OX=6645 GN=LOC115212215 PE=4 SV=2; 16596797 gb|AAK28276.2| hemocyanin G-type [Enteroctopus dofleini]; hemocyanin G-type, units Oda to Odg OS=Octopus vulgaris OX=6645 GN=LOC115211670 PE=4 SV=2; 16596797 gb|AAK28276.2| hemocyanin G-type [Enteroctopus dofleini]	1	3	3	0.5539	0	1	1	1	719.73	2157.18	2157.18	-0.45	-0.00033	0/0	0	0	357454	HCD (High Energy Collision Dissociation)	MS2	19.8766	100	66.7619	12629	12629	12626	MCMMCM34021206.raw	F6	874	3.99	3	0.0001881	1.18x10⁻⁶	2.168
High	Sequest HT	Sequest HT (A2)	A	2	Unambiguous	CPFPQLFNDVQLK	cPFPQLFNDVQLK	C1(Carbamidomethyl)	2	A0A6P7SZ80; Cluster-58773.209953;orf1 len=535 frame:3 start:105 end:1709 gi	uncharacterized protein LOC115218075 OS=Octopus vulgaris OX=6645 GN=LOC115218075 PE=4 SV=1 676482428 ref|XP_009062697.1| hypothetical protein LOTGIDRAFT_235309 [Lottia gigantea]>gi|556098070|gb|ESO86722.1| hypothetical protein LOTGIDRAFT_235309 [Lottia gigantea]	A0A6P7SZ80; Cluster-58773.209953;orf1 len=535 frame:3 start:105 end:1709 gi	uncharacterized protein LOC115218075 OS=Octopus vulgaris OX=6645 GN=LOC115218075 PE=4 SV=1; 676482428 ref|XP_009062697.1| hypothetical protein LOTGIDRAFT_235309 [Lottia gigantea]>gi|556098070|gb|ESO86722.1| hypothetical protein LOTGIDRAFT_235309 [Lottia gigantea]	0	2	2	0.5128	0	1	1	1	803.41	1605.81	1605.81	1.7	0.00136	0/0	0	0	247667	HCD (High Energy Collision Dissociation)	MS2	48.1015	100	66.673	12614	12614	12604	MCMMCM34021206.raw	F6	1674	2.73	2	0.0001881	1.03x10⁻⁴	1.407
High	Sequest HT	Sequest HT (A2)	A	2	Unambiguous	NLFPHHGYIWNYGALPQTWEDPNFVTPDTNTK	NLFPHHGYIWNYGALPQTWEDPNFVTPDTNTK		3	A0A6P7SIX4	Inorganic diphosphatase OS=Octopus vulgaris OX=6645 GN=LOC115213471 PE=3 SV=2	Cluster-58773.174399;orf1 len=476 frame:3 start:30 end:1457 gi; A0A6P7SIX4; Cluster-58773.174398;orf1 len=474 frame:3 start:30 end:1451 gi	762094182 ref|XP_011429567.1| PREDICTED: inorganic pyrophosphatase-like isoform X2 [Crassostrea gigas]; Inorganic diphosphatase OS=Octopus vulgaris OX=6645 GN=LOC115213471 PE=3 SV=2; 762094182 ref|XP_011429567.1| PREDICTED: inorganic pyrophosphatase-like isoform X2 [Crassostrea gigas]	0	4	4	0.4429	0	1	1	1	943.952	3772.79	3772.78	1.46	0.00138	0/0	0	0	76477.8	HCD (High Energy Collision Dissociation)	MS2	55.2897	100	66.6591	12611	12611	12604	MCMMCM34021206.raw	F6	885	2.89	1	0.0001881	1.53x10⁻⁵	1.732
High	Sequest HT	Sequest HT (A2)	A	2	Unambiguous	ALQAYEDDKSPNGYQQVAAFHGSTQWCPSPDAAVK	ALQAYEDDKSPNGYQQVAAFHGSTQWcPSPDAAVK	C27(Carbamidomethyl)	4	A0A6P7SER3; A0A6P7SDC4; Cluster-58773.162319;orf1 len=2921 frame:3 start:24 end:8786 gi	hemocyanin 1-like OS=Octopus vulgaris OX=6645 GN=LOC115212215 PE=4 SV=2 hemocyanin G-type, units Oda to Odg OS=Octopus vulgaris OX=6645 GN=LOC115211670 PE=4 SV=2 16596797 gb|AAK28276.2| hemocyanin G-type [Enteroctopus dofleini]	A0A6P7SER3; Cluster-58773.162316;orf1 len=2526 frame:3 start:24 end:7601 gi; A0A6P7SDC4; Cluster-58773.162319;orf1 len=2921 frame:3 start:24 end:8786 gi	hemocyanin 1-like OS=Octopus vulgaris OX=6645 GN=LOC115212215 PE=4 SV=2; 16596797 gb|AAK28276.2| hemocyanin G-type [Enteroctopus dofleini]; hemocyanin G-type, units Oda to Odg OS=Octopus vulgaris OX=6645 GN=LOC115211670 PE=4 SV=2; 16596797 gb|AAK28276.2| hemocyanin G-type [Enteroctopus dofleini]	1	4	4	0.6475	0	1	1	1	959.947	3836.76	3836.76	0.91	0.00087	0/0	0	0	96126.4	HCD (High Energy Collision Dissociation)	MS2	13.4102	100	66.6452	12608	12608	12604	MCMMCM34021206.raw	F6	706	3.83	3	0.0001881	4.86x10⁻⁴	1.143
High	Sequest HT	Sequest HT (A2)	A	2	Unambiguous	TDIAIFTIGIGPAVKPSELR	TDIAIFTIGIGPAVKPSELR		3	Cluster-58773.164160;orf1 len=408 frame:3 start:3 end:1226 gi	405966888 gb|EKC32120.1| Collagen alpha-3(VI) chain [Crassostrea gigas]	A0A7E6F5B1; Cluster-58773.164160;orf1 len=408 frame:3 start:3 end:1226 gi; Cluster-58773.164156;orf1 len=190 frame:-2 start:572 end:3 gi	collagen alpha-1(XII) chain-like OS=Octopus vulgaris OX=6645 GN=LOC118765117 PE=4 SV=1; 405966888 gb|EKC32120.1| Collagen alpha-3(VI) chain [Crassostrea gigas]; 871246464 ref|XP_012940508.1| PREDICTED: uncharacterized protein LOC101848762 [Aplysia californica]	0	3	3	0.5719	0	1	1	1	700.069	2098.19	2098.19	0.2	0.00014	0/0	0	0	219735	HCD (High Energy Collision Dissociation)	MS2	19.9027	100	66.5987	12600	12600	12593	MCMMCM34021206.raw	F6	381	3.06	1	0.0001881	8.43x10⁻⁴	1.049
High	Sequest HT	Sequest HT (A2)	A	2	Unambiguous	GLEMELEEALNGR	GLEMELEEALNGR		7	Cluster-58773.158799;orf1 len=293 frame:-2 start:880 end:2 gi; A0A7E6FJC7; A0A6P7TG59	159741 gb|AAA16613.1| omega-crystallin [Enteroctopus dofleini] 70 kDa neurofilament protein-like isoform X4 OS=Octopus vulgaris OX=6645 GN=LOC115222739 PE=3 SV=1 70 kDa neurofilament protein OS=Octopus vulgaris OX=6645 GN=LOC115222955 PE=3 SV=1	Cluster-58773.158799;orf1 len=293 frame:-2 start:880 end:2 gi; A0A7E6FJC7; A0A6P7TG59; Cluster-58773.158797;orf1 len=321 frame:2 start:2 end:964 gi; Cluster-58773.158910;orf1 len=512 frame:-1 start:1537 end:2 gi; Cluster-58773.158801;orf1 len=282 frame:-3 start:847 end:2 gi; Cluster-58773.158796;orf1 len=334 frame:1 start:679 end:1680 gi	159741 gb|AAA16613.1| omega-crystallin [Enteroctopus dofleini]; 70 kDa neurofilament protein-like isoform X4 OS=Octopus vulgaris OX=6645 GN=LOC115222739 PE=3 SV=1; 70 kDa neurofilament protein OS=Octopus vulgaris OX=6645 GN=LOC115222955 PE=3 SV=1; 159741 gb|AAA16613.1| omega-crystallin [Enteroctopus dofleini]; 159741 gb|AAA16613.1| omega-crystallin [Enteroctopus dofleini]; 159741 gb|AAA16613.1| o…	0	2	2	0.645	0	1	1	1	730.857	1460.71	1460.7	0.59	0.00043	0/0	0	0	338541	HCD (High Energy Collision Dissociation)	MS2	17.077	100	66.5941	12599	12599	12593	MCMMCM34021206.raw	F6	1074	3.69	3	0.0001881	1.77x10⁻⁶	2.099
High	Sequest HT	Sequest HT (A2)	A	2	Unambiguous	AGEFYVLGSANEMPWK	AGEFYVLGSANEMPWK		4	A0A6P7SER3; A0A6P7SDC4; Cluster-58773.162319;orf1 len=2921 frame:3 start:24 end:8786 gi	hemocyanin 1-like OS=Octopus vulgaris OX=6645 GN=LOC115212215 PE=4 SV=2 hemocyanin G-type, units Oda to Odg OS=Octopus vulgaris OX=6645 GN=LOC115211670 PE=4 SV=2 16596797 gb|AAK28276.2| hemocyanin G-type [Enteroctopus dofleini]	A0A6P7SER3; Cluster-58773.162316;orf1 len=2526 frame:3 start:24 end:7601 gi; A0A6P7SDC4; Cluster-58773.162319;orf1 len=2921 frame:3 start:24 end:8786 gi	hemocyanin 1-like OS=Octopus vulgaris OX=6645 GN=LOC115212215 PE=4 SV=2; 16596797 gb|AAK28276.2| hemocyanin G-type [Enteroctopus dofleini]; hemocyanin G-type, units Oda to Odg OS=Octopus vulgaris OX=6645 GN=LOC115211670 PE=4 SV=2; 16596797 gb|AAK28276.2| hemocyanin G-type [Enteroctopus dofleini]	0	3	3	0.5592	0	1	1	1	600.287	1798.85	1798.85	0.03	2e-05	0/0	0	0	1039591	HCD (High Energy Collision Dissociation)	MS2	1.68621	34.772	66.9297	12660	12660	12659	MCMMCM34021206.raw	F6	997	3.04	3	0.0001881	2.23x10⁻³	0.883
High	Sequest HT	Sequest HT (A2)	A	2	Unambiguous	SVETLTEDEVLNLQVALR	SVETLTEDEVLNLQVALR		4	A0A6P7SER3; A0A6P7SDC4; Cluster-58773.162319;orf1 len=2921 frame:3 start:24 end:8786 gi	hemocyanin 1-like OS=Octopus vulgaris OX=6645 GN=LOC115212215 PE=4 SV=2 hemocyanin G-type, units Oda to Odg OS=Octopus vulgaris OX=6645 GN=LOC115211670 PE=4 SV=2 16596797 gb|AAK28276.2| hemocyanin G-type [Enteroctopus dofleini]	A0A6P7SER3; Cluster-58773.162316;orf1 len=2526 frame:3 start:24 end:7601 gi; A0A6P7SDC4; Cluster-58773.162319;orf1 len=2921 frame:3 start:24 end:8786 gi	hemocyanin 1-like OS=Octopus vulgaris OX=6645 GN=LOC115212215 PE=4 SV=2; 16596797 gb|AAK28276.2| hemocyanin G-type [Enteroctopus dofleini]; hemocyanin G-type, units Oda to Odg OS=Octopus vulgaris OX=6645 GN=LOC115211670 PE=4 SV=2; 16596797 gb|AAK28276.2| hemocyanin G-type [Enteroctopus dofleini]	0	2	2	0.6505	0	1	1	1	1015.05	2029.09	2029.08	2.79	0.00283	0/0	0	0	282016	HCD (High Energy Collision Dissociation)	MS2	22.5511	100	77.9585	14595	14595	14593	MCMMCM34021206.raw	F6	1087	4.75	3	0.0001881	1.05x10⁻⁸	2.974
High	Sequest HT	Sequest HT (A2)	A	2	Unambiguous	DIRPELFEISGGEGSTLYR	DIRPELFEISGGEGSTLYR		4	A0A6P7SER3; A0A6P7SDC4; Cluster-58773.162319;orf1 len=2921 frame:3 start:24 end:8786 gi	hemocyanin 1-like OS=Octopus vulgaris OX=6645 GN=LOC115212215 PE=4 SV=2 hemocyanin G-type, units Oda to Odg OS=Octopus vulgaris OX=6645 GN=LOC115211670 PE=4 SV=2 16596797 gb|AAK28276.2| hemocyanin G-type [Enteroctopus dofleini]	A0A6P7SER3; Cluster-58773.162316;orf1 len=2526 frame:3 start:24 end:7601 gi; A0A6P7SDC4; Cluster-58773.162319;orf1 len=2921 frame:3 start:24 end:8786 gi	hemocyanin 1-like OS=Octopus vulgaris OX=6645 GN=LOC115212215 PE=4 SV=2; 16596797 gb|AAK28276.2| hemocyanin G-type [Enteroctopus dofleini]; hemocyanin G-type, units Oda to Odg OS=Octopus vulgaris OX=6645 GN=LOC115211670 PE=4 SV=2; 16596797 gb|AAK28276.2| hemocyanin G-type [Enteroctopus dofleini]	0	2	2	0.6964	0	1	1	1	1070.04	2139.07	2139.07	-0.16	-0.00017	0/0	0	0	521640	HCD (High Energy Collision Dissociation)	MS2	4.23607	77.942	67.5466	12785	12785	12780	MCMMCM34021206.raw	F6	1269	6.06	3	0.0001881	8.05x10⁻¹¹	3.803
High	Sequest HT	Sequest HT (A2)	A	2	Unambiguous	AFDYHELGYDYDNLNFHGMTIPELEEHLK	AFDYHELGYDYDNLNFHGMTIPELEEHLK		3	A0A6P7SER3; A0A6P7SDC4; Cluster-58773.162319;orf1 len=2921 frame:3 start:24 end:8786 gi	hemocyanin 1-like OS=Octopus vulgaris OX=6645 GN=LOC115212215 PE=4 SV=2 hemocyanin G-type, units Oda to Odg OS=Octopus vulgaris OX=6645 GN=LOC115211670 PE=4 SV=2 16596797 gb|AAK28276.2| hemocyanin G-type [Enteroctopus dofleini]	A0A6P7SER3; A0A6P7SDC4; Cluster-58773.162319;orf1 len=2921 frame:3 start:24 end:8786 gi	hemocyanin 1-like OS=Octopus vulgaris OX=6645 GN=LOC115212215 PE=4 SV=2; hemocyanin G-type, units Oda to Odg OS=Octopus vulgaris OX=6645 GN=LOC115211670 PE=4 SV=2; 16596797 gb|AAK28276.2| hemocyanin G-type [Enteroctopus dofleini]	0	4	4	0.688	0	1	1	1	878.404	3510.59	3510.59	-0.34	-0.0003	0/0	0	0	337953	HCD (High Energy Collision Dissociation)	MS2	9.65131	74.265	67.5601	12788	12788	12780	MCMMCM34021206.raw	F6	524	3.75	3	0.0001881	9.55x10⁻⁶	1.812
High	Sequest HT	Sequest HT (A2)	A	2	Unambiguous	GSQIGVPYWDWTKPSSELPPLVAAETYEDPYTK	GSQIGVPYWDWTKPSSELPPLVAAETYEDPYTK		3	A0A6P7SER3; Cluster-58773.162319;orf1 len=2921 frame:3 start:24 end:8786 gi	hemocyanin 1-like OS=Octopus vulgaris OX=6645 GN=LOC115212215 PE=4 SV=2 16596797 gb|AAK28276.2| hemocyanin G-type [Enteroctopus dofleini]	A0A6P7SER3; Cluster-58773.162316;orf1 len=2526 frame:3 start:24 end:7601 gi; Cluster-58773.162319;orf1 len=2921 frame:3 start:24 end:8786 gi	hemocyanin 1-like OS=Octopus vulgaris OX=6645 GN=LOC115212215 PE=4 SV=2; 16596797 gb|AAK28276.2| hemocyanin G-type [Enteroctopus dofleini]; 16596797 gb|AAK28276.2| hemocyanin G-type [Enteroctopus dofleini]	0	3	3	0.2222	0	1	1	1	1242.27	3724.8	3724.81	-0.22	-0.00027	0/0	0	0	214263	HCD (High Energy Collision Dissociation)	MS2	3.75568	84.586	68.0437	12881	12881	12879	MCMMCM34021206.raw	F6	1048	1.44	2	0.0001881	5.39x10⁻³	0.732
High	Sequest HT	Sequest HT (A2)	A	2	Unambiguous	SVETLTEDEVLNLQVALR	SVETLTEDEVLNLQVALR		4	A0A6P7SER3; A0A6P7SDC4; Cluster-58773.162319;orf1 len=2921 frame:3 start:24 end:8786 gi	hemocyanin 1-like OS=Octopus vulgaris OX=6645 GN=LOC115212215 PE=4 SV=2 hemocyanin G-type, units Oda to Odg OS=Octopus vulgaris OX=6645 GN=LOC115211670 PE=4 SV=2 16596797 gb|AAK28276.2| hemocyanin G-type [Enteroctopus dofleini]	A0A6P7SER3; Cluster-58773.162316;orf1 len=2526 frame:3 start:24 end:7601 gi; A0A6P7SDC4; Cluster-58773.162319;orf1 len=2921 frame:3 start:24 end:8786 gi	hemocyanin 1-like OS=Octopus vulgaris OX=6645 GN=LOC115212215 PE=4 SV=2; 16596797 gb|AAK28276.2| hemocyanin G-type [Enteroctopus dofleini]; hemocyanin G-type, units Oda to Odg OS=Octopus vulgaris OX=6645 GN=LOC115211670 PE=4 SV=2; 16596797 gb|AAK28276.2| hemocyanin G-type [Enteroctopus dofleini]	0	3	3	0.6272	0	1	1	1	677.032	2029.08	2029.08	-0.29	-0.0002	0/0	0	0	657285	HCD (High Energy Collision Dissociation)	MS2	29.4696	84.897	67.9888	12871	12871	12868	MCMMCM34021206.raw	F6	1149	2.79	3	0.0001881	8.34x10⁻⁶	1.835
High	Sequest HT	Sequest HT (A2)	A	2	Unambiguous	IEITDVLANNNLAFDSPFTIK	IEITDVLANNNLAFDSPFTIK		4	A0A6P7SER3; A0A6P7SDC4; Cluster-58773.162319;orf1 len=2921 frame:3 start:24 end:8786 gi	hemocyanin 1-like OS=Octopus vulgaris OX=6645 GN=LOC115212215 PE=4 SV=2 hemocyanin G-type, units Oda to Odg OS=Octopus vulgaris OX=6645 GN=LOC115211670 PE=4 SV=2 16596797 gb|AAK28276.2| hemocyanin G-type [Enteroctopus dofleini]	A0A6P7SER3; Cluster-58773.162316;orf1 len=2526 frame:3 start:24 end:7601 gi; A0A6P7SDC4; Cluster-58773.162319;orf1 len=2921 frame:3 start:24 end:8786 gi	hemocyanin 1-like OS=Octopus vulgaris OX=6645 GN=LOC115212215 PE=4 SV=2; 16596797 gb|AAK28276.2| hemocyanin G-type [Enteroctopus dofleini]; hemocyanin G-type, units Oda to Odg OS=Octopus vulgaris OX=6645 GN=LOC115211670 PE=4 SV=2; 16596797 gb|AAK28276.2| hemocyanin G-type [Enteroctopus dofleini]	0	2	2	0.5854	0	1	1	1	1168.11	2335.22	2335.22	-0.45	-0.00052	0/0	0	0	151364	HCD (High Energy Collision Dissociation)	MS2	13.4633	100	67.944	12863	12863	12857	MCMMCM34021206.raw	F6	1154	3.16	3	0.0001881	8.19x10⁻⁶	1.839
High	Sequest HT	Sequest HT (A2)	A	2	Unambiguous	LVVMQFEDALIAR	LVVMQFEDALIAR		6	A0A0L8GNM6; A0A6P7SER3; A0A6P7SDC4; Cluster-58773.162319;orf1 len=2921 frame:3 start:24 end:8786 gi	Uncharacterized protein OS=Octopus bimaculoides OX=37653 GN=OCBIM_22031096mg PE=4 SV=1 hemocyanin 1-like OS=Octopus vulgaris OX=6645 GN=LOC115212215 PE=4 SV=2 hemocyanin G-type, units Oda to Odg OS=Octopus vulgaris OX=6645 GN=LOC115211670 PE=4 SV=2 16596797 gb|AAK28276.2| hemocyanin G-type [Enteroctopus dofleini]	A0A0L8GNM6; A0A6P7SER3; Cluster-58773.162316;orf1 len=2526 frame:3 start:24 end:7601 gi; A0A6P7SDC4; Cluster-58773.162317;orf1 len=187 frame:-3 start:561 end:1 gi; Cluster-58773.162319;orf1 len=2921 frame:3 start:24 end:8786 gi	Uncharacterized protein OS=Octopus bimaculoides OX=37653 GN=OCBIM_22031096mg PE=4 SV=1; hemocyanin 1-like OS=Octopus vulgaris OX=6645 GN=LOC115212215 PE=4 SV=2; 16596797 gb|AAK28276.2| hemocyanin G-type [Enteroctopus dofleini]; hemocyanin G-type, units Oda to Odg OS=Octopus vulgaris OX=6645 GN=LOC115211670 PE=4 SV=2; 52550954 gb|AAU84460.1| hemocyanin A-type [Enteroctopus dofleini]; 16596797 gb|A…	0	2	2	0	0	1	1	1	752.913	1504.82	1504.82	-0.62	-0.00047	0/0	0	0	278519	HCD (High Energy Collision Dissociation)	MS2	16.4632	100	67.9395	12862	12862	12857	MCMMCM34021206.raw	F6	1198	3.61	4	0.0001881	1.61x10⁻⁵	1.723
High	Sequest HT	Sequest HT (A2)	A	2	Unambiguous	LLGDPDYYDAWTDNVIENPFLR	LLGDPDYYDAWTDNVIENPFLR		4	A0A6P7SER3; A0A6P7SDC4; Cluster-58773.162319;orf1 len=2921 frame:3 start:24 end:8786 gi	hemocyanin 1-like OS=Octopus vulgaris OX=6645 GN=LOC115212215 PE=4 SV=2 hemocyanin G-type, units Oda to Odg OS=Octopus vulgaris OX=6645 GN=LOC115211670 PE=4 SV=2 16596797 gb|AAK28276.2| hemocyanin G-type [Enteroctopus dofleini]	A0A6P7SER3; Cluster-58773.162316;orf1 len=2526 frame:3 start:24 end:7601 gi; A0A6P7SDC4; Cluster-58773.162319;orf1 len=2921 frame:3 start:24 end:8786 gi	hemocyanin 1-like OS=Octopus vulgaris OX=6645 GN=LOC115212215 PE=4 SV=2; 16596797 gb|AAK28276.2| hemocyanin G-type [Enteroctopus dofleini]; hemocyanin G-type, units Oda to Odg OS=Octopus vulgaris OX=6645 GN=LOC115211670 PE=4 SV=2; 16596797 gb|AAK28276.2| hemocyanin G-type [Enteroctopus dofleini]	0	2	2	0.7406	0	1	1	1	1313.63	2626.25	2626.25	1.36	0.00178	0/0	0	0	203136	HCD (High Energy Collision Dissociation)	MS2	0	100	67.9348	12861	12861	12857	MCMMCM34021206.raw	F6	1148	4.01	3	0.0001881	1.12x10⁻⁸	2.962
High	Sequest HT	Sequest HT (A2)	A	2	Unambiguous	LFVIWQALQK	LFVIWQALQK		4	A0A6P7SER3; A0A6P7SDC4; Cluster-58773.162319;orf1 len=2921 frame:3 start:24 end:8786 gi	hemocyanin 1-like OS=Octopus vulgaris OX=6645 GN=LOC115212215 PE=4 SV=2 hemocyanin G-type, units Oda to Odg OS=Octopus vulgaris OX=6645 GN=LOC115211670 PE=4 SV=2 16596797 gb|AAK28276.2| hemocyanin G-type [Enteroctopus dofleini]	A0A6P7SER3; Cluster-58773.162316;orf1 len=2526 frame:3 start:24 end:7601 gi; A0A6P7SDC4; Cluster-58773.162319;orf1 len=2921 frame:3 start:24 end:8786 gi	hemocyanin 1-like OS=Octopus vulgaris OX=6645 GN=LOC115212215 PE=4 SV=2; 16596797 gb|AAK28276.2| hemocyanin G-type [Enteroctopus dofleini]; hemocyanin G-type, units Oda to Odg OS=Octopus vulgaris OX=6645 GN=LOC115211670 PE=4 SV=2; 16596797 gb|AAK28276.2| hemocyanin G-type [Enteroctopus dofleini]	0	2	2	0.3667	0	1	1	1	623.371	1245.73	1245.74	-0.83	-0.00052	0/0	0	0	358851	HCD (High Energy Collision Dissociation)	MS2	54.8865	100	67.9303	12860	12860	12857	MCMMCM34021206.raw	F6	546	2.1	3	0.0001881	3.25x10⁻³	0.818
High	Sequest HT	Sequest HT (A2)	A	2	Unambiguous	SVETLTEDEVLNLQVALR	SVETLTEDEVLNLQVALR		4	A0A6P7SER3; A0A6P7SDC4; Cluster-58773.162319;orf1 len=2921 frame:3 start:24 end:8786 gi	hemocyanin 1-like OS=Octopus vulgaris OX=6645 GN=LOC115212215 PE=4 SV=2 hemocyanin G-type, units Oda to Odg OS=Octopus vulgaris OX=6645 GN=LOC115211670 PE=4 SV=2 16596797 gb|AAK28276.2| hemocyanin G-type [Enteroctopus dofleini]	A0A6P7SER3; Cluster-58773.162316;orf1 len=2526 frame:3 start:24 end:7601 gi; A0A6P7SDC4; Cluster-58773.162319;orf1 len=2921 frame:3 start:24 end:8786 gi	hemocyanin 1-like OS=Octopus vulgaris OX=6645 GN=LOC115212215 PE=4 SV=2; 16596797 gb|AAK28276.2| hemocyanin G-type [Enteroctopus dofleini]; hemocyanin G-type, units Oda to Odg OS=Octopus vulgaris OX=6645 GN=LOC115211670 PE=4 SV=2; 16596797 gb|AAK28276.2| hemocyanin G-type [Enteroctopus dofleini]	0	2	2	0.5894	0	1	1	1	1015.04	2029.08	2029.08	0.1	0.00011	0/0	0	0	430634	HCD (High Energy Collision Dissociation)	MS2	0	100	67.921	12858	12858	12857	MCMMCM34021206.raw	F6	1148	2.07	3	0.0001881	8.04x10⁻⁴	1.057
High	Sequest HT	Sequest HT (A2)	A	2	Unambiguous	TTEEESITFEVFR	TTEEESITFEVFR		3	A0A6P7SI10; Cluster-58773.163438;orf1 len=994 frame:2 start:254 end:3235 gi	CD109 antigen isoform X2 OS=Octopus vulgaris OX=6645 GN=LOC115213260 PE=4 SV=1 410935705 gb|AFV94409.1| thioester-containing protein 1 [Euprymna scolopes]	A0A6P7SI10; A0A7E6F3R1; Cluster-58773.163438;orf1 len=994 frame:2 start:254 end:3235 gi	CD109 antigen isoform X2 OS=Octopus vulgaris OX=6645 GN=LOC115213260 PE=4 SV=1; CD109 antigen isoform X1 OS=Octopus vulgaris OX=6645 GN=LOC115213260 PE=4 SV=1; 410935705 gb|AFV94409.1| thioester-containing protein 1 [Euprymna scolopes]	0	2	2	0.7093	0	1	1	1	794.381	1587.75	1587.75	0.45	0.00036	0/0	0	0	1.14332e+06	HCD (High Energy Collision Dissociation)	MS2	21.2999	59.638	67.8667	12848	12848	12846	MCMMCM34021206.raw	F6	1003	3.75	2	0.0001881	4.36x10⁻⁷	2.338
High	Sequest HT	Sequest HT (A2)	A	2	Unambiguous	KSVETLTEDEVLNLQVALR	KSVETLTEDEVLNLQVALR		4	A0A6P7SER3; A0A6P7SDC4; Cluster-58773.162319;orf1 len=2921 frame:3 start:24 end:8786 gi	hemocyanin 1-like OS=Octopus vulgaris OX=6645 GN=LOC115212215 PE=4 SV=2 hemocyanin G-type, units Oda to Odg OS=Octopus vulgaris OX=6645 GN=LOC115211670 PE=4 SV=2 16596797 gb|AAK28276.2| hemocyanin G-type [Enteroctopus dofleini]	A0A6P7SER3; Cluster-58773.162316;orf1 len=2526 frame:3 start:24 end:7601 gi; A0A6P7SDC4; Cluster-58773.162319;orf1 len=2921 frame:3 start:24 end:8786 gi	hemocyanin 1-like OS=Octopus vulgaris OX=6645 GN=LOC115212215 PE=4 SV=2; 16596797 gb|AAK28276.2| hemocyanin G-type [Enteroctopus dofleini]; hemocyanin G-type, units Oda to Odg OS=Octopus vulgaris OX=6645 GN=LOC115211670 PE=4 SV=2; 16596797 gb|AAK28276.2| hemocyanin G-type [Enteroctopus dofleini]	1	2	2	0.7454	0	1	1	1	1079.09	2157.18	2157.18	1.29	0.00139	0/0	0	0	554546	HCD (High Energy Collision Dissociation)	MS2	5.1479	100	67.5554	12787	12787	12780	MCMMCM34021206.raw	F6	797	6.56	3	0.0001881	7.01x10⁻¹²	4.219
High	Sequest HT	Sequest HT (A2)	A	2	Unambiguous	SKNESLEEEVEDLTEQLR	SKNESLEEEVEDLTEQLR		6	A0A6P7TG59; A0A6P7TDP2; A0A7E6FLI0	70 kDa neurofilament protein OS=Octopus vulgaris OX=6645 GN=LOC115222955 PE=3 SV=1 70 kDa neurofilament protein isoform X1 OS=Octopus vulgaris OX=6645 GN=LOC115222954 PE=3 SV=1 intermediate filament protein ifa-4-like OS=Octopus vulgaris OX=6645 GN=LOC118767372 PE=4 SV=1	A0A7E6FJ41; A0A6P7TG59; A0A6P7TDP2; A0A0L8GZP6; A0A7E6FLI0; A0A0L8GZB0	70 kDa neurofilament protein isoform X2 OS=Octopus vulgaris OX=6645 GN=LOC115222954 PE=3 SV=1; 70 kDa neurofilament protein OS=Octopus vulgaris OX=6645 GN=LOC115222955 PE=3 SV=1; 70 kDa neurofilament protein isoform X1 OS=Octopus vulgaris OX=6645 GN=LOC115222954 PE=3 SV=1; IF rod domain-containing protein OS=Octopus bimaculoides OX=37653 GN=OCBIM_22025456mg PE=4 SV=1; intermediate filament protei…	1	2	2	0.6386	0	1	1	1	1074.52	2148.03	2148.03	0.48	0.00051	0/0	0	0	1.19867e+06	HCD (High Energy Collision Dissociation)	MS2	10.4749	61.229	67.8627	12847	12847	12846	MCMMCM34021206.raw	F6	1196	5.81	3	0.0001881	7.09x10⁻¹¹	3.825
High	Sequest HT	Sequest HT (A2)	A	2	Unambiguous	SKNESLEEEVEDLTEQLR	SKNESLEEEVEDLTEQLR		6	A0A6P7TG59; A0A6P7TDP2; A0A7E6FLI0	70 kDa neurofilament protein OS=Octopus vulgaris OX=6645 GN=LOC115222955 PE=3 SV=1 70 kDa neurofilament protein isoform X1 OS=Octopus vulgaris OX=6645 GN=LOC115222954 PE=3 SV=1 intermediate filament protein ifa-4-like OS=Octopus vulgaris OX=6645 GN=LOC118767372 PE=4 SV=1	A0A7E6FJ41; A0A6P7TG59; A0A6P7TDP2; A0A0L8GZP6; A0A7E6FLI0; A0A0L8GZB0	70 kDa neurofilament protein isoform X2 OS=Octopus vulgaris OX=6645 GN=LOC115222954 PE=3 SV=1; 70 kDa neurofilament protein OS=Octopus vulgaris OX=6645 GN=LOC115222955 PE=3 SV=1; 70 kDa neurofilament protein isoform X1 OS=Octopus vulgaris OX=6645 GN=LOC115222954 PE=3 SV=1; IF rod domain-containing protein OS=Octopus bimaculoides OX=37653 GN=OCBIM_22025456mg PE=4 SV=1; intermediate filament protei…	1	3	3	0.65	0	1	1	1	716.681	2148.03	2148.03	-0.24	-0.00017	0/0	0	0	994019	HCD (High Energy Collision Dissociation)	MS2	3.66775	46.267	67.8099	12837	12837	12835	MCMMCM34021206.raw	F6	1203	5	3	0.0001881	7.71x10⁻⁷	2.241
High	Sequest HT	Sequest HT (A2)	A	2	Unambiguous	LLTINFENGLR	LLTINFENGLR		5	A0A6P7SER3; A0A6P7SDC4; Q5XLV2; Cluster-58773.162319;orf1 len=2921 frame:3 start:24 end:8786 gi	hemocyanin 1-like OS=Octopus vulgaris OX=6645 GN=LOC115212215 PE=4 SV=2 hemocyanin G-type, units Oda to Odg OS=Octopus vulgaris OX=6645 GN=LOC115211670 PE=4 SV=2 Hemocyanin A-type (Fragment) OS=Enteroctopus dofleini OX=267067 GN=HA PE=4 SV=1 16596797 gb|AAK28276.2| hemocyanin G-type [Enteroctopus dofleini]	A0A6P7SER3; Cluster-58773.162316;orf1 len=2526 frame:3 start:24 end:7601 gi; A0A6P7SDC4; Q5XLV2; Cluster-58773.162319;orf1 len=2921 frame:3 start:24 end:8786 gi	hemocyanin 1-like OS=Octopus vulgaris OX=6645 GN=LOC115212215 PE=4 SV=2; 16596797 gb|AAK28276.2| hemocyanin G-type [Enteroctopus dofleini]; hemocyanin G-type, units Oda to Odg OS=Octopus vulgaris OX=6645 GN=LOC115211670 PE=4 SV=2; Hemocyanin A-type (Fragment) OS=Enteroctopus dofleini OX=267067 GN=HA PE=4 SV=1; 16596797 gb|AAK28276.2| hemocyanin G-type [Enteroctopus dofleini]	0	2	2	0	0	1	1	1	645.364	1289.72	1289.72	0.19	0.00013	0/0	0	0	670045	HCD (High Energy Collision Dissociation)	MS2	2.45804	95.154	67.6555	12808	12808	12802	MCMMCM34021206.raw	F6	1151	2.64	4	0.0001881	3.10x10⁻⁴	1.219
High	Sequest HT	Sequest HT (A2)	A	2	Unambiguous	SIDGHTLPNSYLTPPTVFFVPAK	SIDGHTLPNSYLTPPTVFFVPAK		2	A0A6P7SER3; Cluster-58773.162300;orf1 len=48 frame:2 start:2 end:145 gi	hemocyanin 1-like OS=Octopus vulgaris OX=6645 GN=LOC115212215 PE=4 SV=2 52550954 gb|AAU84460.1| hemocyanin A-type [Enteroctopus dofleini]	A0A6P7SER3; Cluster-58773.162300;orf1 len=48 frame:2 start:2 end:145 gi	hemocyanin 1-like OS=Octopus vulgaris OX=6645 GN=LOC115212215 PE=4 SV=2; 52550954 gb|AAU84460.1| hemocyanin A-type [Enteroctopus dofleini]	0	2	2	0.5749	0	1	1	1	1251.16	2501.31	2501.31	1.27	0.00159	0/0	0	0	664845	HCD (High Energy Collision Dissociation)	MS2	0	63.862	67.6436	12805	12805	12802	MCMMCM34021206.raw	F6	1048	4.14	2	0.0001881	5.68x10⁻³	0.723
High	Sequest HT	Sequest HT (A2)	A	2	Unambiguous	LYVALVENELLAR	LYVALVENELLAR		8	A0A6P7SER3; Q9BJ58; O61363; A0A6P7SDC4; Q5XLV2; Cluster-58773.162319;orf1 len=2921 frame:3 start:24 end:8786 gi	hemocyanin 1-like OS=Octopus vulgaris OX=6645 GN=LOC115212215 PE=4 SV=2 Hemocyanin G-type (Fragment) OS=Enteroctopus dofleini OX=267067 PE=4 SV=2 Hemocyanin G-type, units Oda to Odg OS=Enteroctopus dofleini OX=267067 GN=ODHCY PE=1 SV=1 hemocyanin G-type, units Oda to Odg OS=Octopus vulgaris OX=6645 GN=LOC115211670 PE=4 SV=2 Hemocyanin A-type (Fragment) OS=Enteroctopus dofleini OX=267067 GN=HA PE=…	A0A6P7SER3; Cluster-58773.162316;orf1 len=2526 frame:3 start:24 end:7601 gi; Q9BJ58; O61363; W6CNR9; A0A6P7SDC4; Q5XLV2; Cluster-58773.162319;orf1 len=2921 frame:3 start:24 end:8786 gi	hemocyanin 1-like OS=Octopus vulgaris OX=6645 GN=LOC115212215 PE=4 SV=2; 16596797 gb|AAK28276.2| hemocyanin G-type [Enteroctopus dofleini]; Hemocyanin G-type (Fragment) OS=Enteroctopus dofleini OX=267067 PE=4 SV=2; Hemocyanin G-type, units Oda to Odg OS=Enteroctopus dofleini OX=267067 GN=ODHCY PE=1 SV=1; Hemocyanin subunit 3 OS=Sepia officinalis OX=6610 PE=2 SV=1; hemocyanin G-type, units Oda to …	0	3	3	0.5407	0	1	1	1	501.624	1502.86	1502.86	-0.79	-0.00039	0/0	0	0	1.37317e+06	HCD (High Energy Collision Dissociation)	MS2	0	31.717	67.6369	12803	12803	12802	MCMMCM34021206.raw	F6	775	2.7	6	0.0001881	4.08x10⁻⁴	1.172
High	Sequest HT	Sequest HT (A2)	A	2	Unambiguous	AFDYHELGYDYDNLNFHGMTIPELEEHLK	AFDYHELGYDYDNLNFHGMTIPELEEHLK		3	A0A6P7SER3; A0A6P7SDC4; Cluster-58773.162319;orf1 len=2921 frame:3 start:24 end:8786 gi	hemocyanin 1-like OS=Octopus vulgaris OX=6645 GN=LOC115212215 PE=4 SV=2 hemocyanin G-type, units Oda to Odg OS=Octopus vulgaris OX=6645 GN=LOC115211670 PE=4 SV=2 16596797 gb|AAK28276.2| hemocyanin G-type [Enteroctopus dofleini]	A0A6P7SER3; A0A6P7SDC4; Cluster-58773.162319;orf1 len=2921 frame:3 start:24 end:8786 gi	hemocyanin 1-like OS=Octopus vulgaris OX=6645 GN=LOC115212215 PE=4 SV=2; hemocyanin G-type, units Oda to Odg OS=Octopus vulgaris OX=6645 GN=LOC115211670 PE=4 SV=2; 16596797 gb|AAK28276.2| hemocyanin G-type [Enteroctopus dofleini]	0	5	5	0.4102	0	1	1	1	702.925	3510.59	3510.59	0.02	2e-05	0/0	0	0	1.31879e+06	HCD (High Energy Collision Dissociation)	MS2	5.22853	12.096	67.599	12796	12796	12791	MCMMCM34021206.raw	F6	529	3.73	3	0.0001881	1.48x10⁻³	0.952
High	Sequest HT	Sequest HT (A2)	A	2	Unambiguous	DIRPELFEISGGEGSTLYR	DIRPELFEISGGEGSTLYR		4	A0A6P7SER3; A0A6P7SDC4; Cluster-58773.162319;orf1 len=2921 frame:3 start:24 end:8786 gi	hemocyanin 1-like OS=Octopus vulgaris OX=6645 GN=LOC115212215 PE=4 SV=2 hemocyanin G-type, units Oda to Odg OS=Octopus vulgaris OX=6645 GN=LOC115211670 PE=4 SV=2 16596797 gb|AAK28276.2| hemocyanin G-type [Enteroctopus dofleini]	A0A6P7SER3; Cluster-58773.162316;orf1 len=2526 frame:3 start:24 end:7601 gi; A0A6P7SDC4; Cluster-58773.162319;orf1 len=2921 frame:3 start:24 end:8786 gi	hemocyanin 1-like OS=Octopus vulgaris OX=6645 GN=LOC115212215 PE=4 SV=2; 16596797 gb|AAK28276.2| hemocyanin G-type [Enteroctopus dofleini]; hemocyanin G-type, units Oda to Odg OS=Octopus vulgaris OX=6645 GN=LOC115211670 PE=4 SV=2; 16596797 gb|AAK28276.2| hemocyanin G-type [Enteroctopus dofleini]	0	3	3	0.5966	0	1	1	1	713.696	2139.07	2139.07	0.27	0.00019	0/0	0	0	4058285	HCD (High Energy Collision Dissociation)	MS2	26.5362	9.674	67.593	12794	12794	12791	MCMMCM34021206.raw	F6	1271	3.52	3	0.0001881	1.07x10⁻⁴	1.401
High	Sequest HT	Sequest HT (A2)	A	2	Unambiguous	SIDGHTLPNSYLTPPTVFFVPAK	SIDGHTLPNSYLTPPTVFFVPAK		2	A0A6P7SER3; Cluster-58773.162300;orf1 len=48 frame:2 start:2 end:145 gi	hemocyanin 1-like OS=Octopus vulgaris OX=6645 GN=LOC115212215 PE=4 SV=2 52550954 gb|AAU84460.1| hemocyanin A-type [Enteroctopus dofleini]	A0A6P7SER3; Cluster-58773.162300;orf1 len=48 frame:2 start:2 end:145 gi	hemocyanin 1-like OS=Octopus vulgaris OX=6645 GN=LOC115212215 PE=4 SV=2; 52550954 gb|AAU84460.1| hemocyanin A-type [Enteroctopus dofleini]	0	3	3	0.6055	0	1	1	1	834.441	2501.31	2501.31	0.85	0.00071	0/0	0	0	3.84075e+06	HCD (High Energy Collision Dissociation)	MS2	4.42143	7.705	67.59	12793	12793	12791	MCMMCM34021206.raw	F6	1083	5.07	2	0.0001881	2.32x10⁻⁶	2.054
High	Sequest HT	Sequest HT (A2)	A	2	Unambiguous	LYVALVENELLAR	LYVALVENELLAR		8	A0A6P7SER3; Q9BJ58; O61363; A0A6P7SDC4; Q5XLV2; Cluster-58773.162319;orf1 len=2921 frame:3 start:24 end:8786 gi	hemocyanin 1-like OS=Octopus vulgaris OX=6645 GN=LOC115212215 PE=4 SV=2 Hemocyanin G-type (Fragment) OS=Enteroctopus dofleini OX=267067 PE=4 SV=2 Hemocyanin G-type, units Oda to Odg OS=Enteroctopus dofleini OX=267067 GN=ODHCY PE=1 SV=1 hemocyanin G-type, units Oda to Odg OS=Octopus vulgaris OX=6645 GN=LOC115211670 PE=4 SV=2 Hemocyanin A-type (Fragment) OS=Enteroctopus dofleini OX=267067 GN=HA PE=…	A0A6P7SER3; Cluster-58773.162316;orf1 len=2526 frame:3 start:24 end:7601 gi; Q9BJ58; O61363; W6CNR9; A0A6P7SDC4; Q5XLV2; Cluster-58773.162319;orf1 len=2921 frame:3 start:24 end:8786 gi	hemocyanin 1-like OS=Octopus vulgaris OX=6645 GN=LOC115212215 PE=4 SV=2; 16596797 gb|AAK28276.2| hemocyanin G-type [Enteroctopus dofleini]; Hemocyanin G-type (Fragment) OS=Enteroctopus dofleini OX=267067 PE=4 SV=2; Hemocyanin G-type, units Oda to Odg OS=Enteroctopus dofleini OX=267067 GN=ODHCY PE=1 SV=1; Hemocyanin subunit 3 OS=Sepia officinalis OX=6610 PE=2 SV=1; hemocyanin G-type, units Oda to …	0	2	2	0.5576	0	1	1	1	751.933	1502.86	1502.86	1.29	0.00097	0/0	0	0	20763636	HCD (High Energy Collision Dissociation)	MS2	28.0705	3.166	67.5873	12792	12792	12791	MCMMCM34021206.raw	F6	628	3.73	6	0.0001881	5.32x10⁻⁷	2.304
High	Sequest HT	Sequest HT (A2)	A	2	Unambiguous	AVFVDLEPTVVDEIR	AVFVDLEPTVVDEIR		13	A0A0L8HMY5; Cluster-58773.153166;orf1 len=458 frame:2 start:386 end:1759 sp	Tubulin alpha chain OS=Octopus bimaculoides OX=37653 GN=OCBIM_22010931mg PE=3 SV=1 P91910 TBA3_CAEEL Tubulin alpha-3 chain OS=Caenorhabditis elegans GN=mec-12 PE=1 SV=1	A0A0L8HN06; A0A0L8HMY5; A0A6P7SVJ3; Cluster-58773.153161;orf1 len=161 frame:-1 start:483 end:1 sp; Cluster-58773.153166;orf1 len=458 frame:2 start:386 end:1759 sp; A0A6P7STB4; A0A0L8GCW8; Q06331; A0A6P7SU98; Cluster-58773.153164;orf1 len=457 frame:2 start:386 end:1756 gi; A0A6P7SUK8; Cluster-58773.153162;orf1 len=120 frame:-3 start:362 end:3 sp; A0A6P7STF6	Tubulin alpha chain OS=Octopus bimaculoides OX=37653 GN=OCBIM_22010928mg PE=3 SV=1; Tubulin alpha chain OS=Octopus bimaculoides OX=37653 GN=OCBIM_22010931mg PE=3 SV=1; Tubulin alpha chain OS=Octopus vulgaris OX=6645 GN=LOC115216829 PE=3 SV=1; Q06331 TBA_ENTDO Tubulin alpha chain OS=Enteroctopus dofleini PE=2 SV=1; P91910 TBA3_CAEEL Tubulin alpha-3 chain OS=Caenorhabditis elegans GN=mec-12 PE=1 SV…	0	2	2	0.0518	0	1	1	1	851.456	1701.9	1701.91	-0.52	-0.00044	0/0	0	0	846224	HCD (High Energy Collision Dissociation)	MS2	26.9864	80.537	67.8207	12840	12840	12835	MCMMCM34021206.raw	F6	1377	3.86	2	0.0001881	4.03x10⁻⁸	2.744
High	Sequest HT	Sequest HT (A2)	A	2	Unambiguous	RDVSSLTHADMNTLRK	RDVSSLTHADMNTLRK		4	A0A6P7SER3; A0A6P7SDC4; Cluster-58773.162319;orf1 len=2921 frame:3 start:24 end:8786 gi	hemocyanin 1-like OS=Octopus vulgaris OX=6645 GN=LOC115212215 PE=4 SV=2 hemocyanin G-type, units Oda to Odg OS=Octopus vulgaris OX=6645 GN=LOC115211670 PE=4 SV=2 16596797 gb|AAK28276.2| hemocyanin G-type [Enteroctopus dofleini]	A0A6P7SER3; Cluster-58773.162316;orf1 len=2526 frame:3 start:24 end:7601 gi; A0A6P7SDC4; Cluster-58773.162319;orf1 len=2921 frame:3 start:24 end:8786 gi	hemocyanin 1-like OS=Octopus vulgaris OX=6645 GN=LOC115212215 PE=4 SV=2; 16596797 gb|AAK28276.2| hemocyanin G-type [Enteroctopus dofleini]; hemocyanin G-type, units Oda to Odg OS=Octopus vulgaris OX=6645 GN=LOC115211670 PE=4 SV=2; 16596797 gb|AAK28276.2| hemocyanin G-type [Enteroctopus dofleini]	2	3	3	0.5943	0	1	1	1	615.319	1843.94	1843.94	-1.75	-0.00108	0/0	0	0	844524	HCD (High Energy Collision Dissociation)	MS2	17.9608	51.213	29.2838	5370	5370	5365	MCMMCM34021207.raw	F7	1331	5.94	3	0.0001881	9.60x10⁻⁷	2.204
High	Sequest HT	Sequest HT (A2)	A	2	Unambiguous	ISGQQDLINK	ISGQQDLINK		4	A0A7E6FSX1	Phospholipase B-like OS=Octopus vulgaris OX=6645 GN=LOC115226130 PE=3 SV=1	Cluster-58773.201320;orf1 len=76 frame:1 start:1 end:228 gi; Cluster-58773.173305;orf1 len=619 frame:1 start:592 end:2448 gi; Cluster-58773.173304;orf1 len=549 frame:-2 start:1647 end:1 gi; A0A7E6FSX1	646721964 gb|KDR23108.1| Putative phospholipase B-like 2 [Zootermopsis nevadensis]; 405969029 gb|EKC34043.1| Putative phospholipase B-like 2 [Crassostrea gigas]; 405969029 gb|EKC34043.1| Putative phospholipase B-like 2 [Crassostrea gigas]; Phospholipase B-like OS=Octopus vulgaris OX=6645 GN=LOC115226130 PE=3 SV=1	0	2	2	0.1628	0	1	1	1	558.305	1115.6	1115.61	-2.28	-0.00127	0/0	0	0	399088	HCD (High Energy Collision Dissociation)	MS2	14.4902	100	29.4402	5401	5401	5398	MCMMCM34021207.raw	F7	1461	1.72	1	0.0001881	1.17x10⁻²	0.599
High	Sequest HT	Sequest HT (A2)	A	2	Unambiguous	HVGDLGNVESGQGVAK	HVGDLGNVESGQGVAK		5	A0A2I7NB22	Superoxide dismutase [Cu-Zn] OS=Octopus vulgaris OX=6645 PE=2 SV=1	Cluster-58773.157484;orf1 len=98 frame:-2 start:294 end:1 gi; A0A2I7NB22; A0A6P7TWQ7; Cluster-58773.157450;orf1 len=186 frame:2 start:2 end:559 gi; Cluster-58773.168419;orf1 len=144 frame:-2 start:432 end:1 gi	451844586 gb|AGF70691.1| Cu-Zn superoxide dismutase [Apostichopus japonicus]; Superoxide dismutase [Cu-Zn] OS=Octopus vulgaris OX=6645 PE=2 SV=1; Superoxide dismutase [Cu-Zn] OS=Octopus vulgaris OX=6645 GN=LOC115227776 PE=3 SV=1; 295136547 gb|ADF80414.1| Cu-Zn superoxide dismutase [Ostrea edulis]; 295136547 gb|ADF80414.1| Cu-Zn superoxide dismutase [Ostrea edulis]	0	3	3	0.5796	0	1	1	1	522.933	1566.78	1566.79	-1.57	-0.00082	0/0	0	0	620738	HCD (High Energy Collision Dissociation)	MS2	20.2217	66.259	29.5503	5421	5421	5420	MCMMCM34021207.raw	F7	1391	4.21	1	0.0001881	6.03x10⁻⁵	1.498
High	Sequest HT	Sequest HT (A2)	A	2	Unambiguous	GIEGNANCGLNMFHKPMEPFGR	GIEGNANcGLNmFHKPMEPFGR	C8(Carbamidomethyl); M12(Oxidation)	1	Q9BJ58	Hemocyanin G-type (Fragment) OS=Enteroctopus dofleini OX=267067 PE=4 SV=2	Q9BJ58	Hemocyanin G-type (Fragment) OS=Enteroctopus dofleini OX=267067 PE=4 SV=2	0	3	3	0.4182	0	1	1	1	831.381	2492.13	2492.13	0.18	0.00015	0/0	0	0	670219	HCD (High Energy Collision Dissociation)	MS2	1.04585	39.854	39.0052	7272	7272	7268	MCMMCM34021207.raw	F7	653	2.75	1	0.0001881	5.54x10⁻³	0.727
High	Sequest HT	Sequest HT (A2)	A	2	Unambiguous	NLNSLNTGHIESLR	NLNSLNTGHIESLR		2	Cluster-58773.162319;orf1 len=2921 frame:3 start:24 end:8786 gi	16596797 gb|AAK28276.2| hemocyanin G-type [Enteroctopus dofleini]	Cluster-58773.162316;orf1 len=2526 frame:3 start:24 end:7601 gi; Cluster-58773.162319;orf1 len=2921 frame:3 start:24 end:8786 gi	16596797 gb|AAK28276.2| hemocyanin G-type [Enteroctopus dofleini]; 16596797 gb|AAK28276.2| hemocyanin G-type [Enteroctopus dofleini]	0	2	2	0.5866	0	1	1	1	784.414	1567.82	1567.82	1.24	0.00097	0/0	0	0	498277	HCD (High Energy Collision Dissociation)	MS2	3.92958	100	38.9758	7267	7267	7257	MCMMCM34021207.raw	F7	1298	4.04	1	0.0001881	8.84x10⁻⁷	2.218
High	Sequest HT	Sequest HT (A2)	A	2	Unambiguous	GIEGNANCGLNMFHKPMEPFGR	GIEGNANcGLNmFHKPMEPFGR	C8(Carbamidomethyl); M12(Oxidation)	1	Q9BJ58	Hemocyanin G-type (Fragment) OS=Enteroctopus dofleini OX=267067 PE=4 SV=2	Q9BJ58	Hemocyanin G-type (Fragment) OS=Enteroctopus dofleini OX=267067 PE=4 SV=2	0	5	5	0.35	0	1	1	1	499.23	2492.12	2492.13	-1.42	-0.00071	0/0	0	0	370996	HCD (High Energy Collision Dissociation)	MS2	18.0016	54.907	38.972	7266	7266	7257	MCMMCM34021207.raw	F7	627	4	1	0.0001881	3.75x10⁻⁴	1.187
High	Sequest HT	Sequest HT (A2)	A	2	Unambiguous	GIEGNANCGLNMFHKPMEPFGR	GIEGNANcGLNmFHKPMEPFGR	C8(Carbamidomethyl); M12(Oxidation)	1	Q9BJ58	Hemocyanin G-type (Fragment) OS=Enteroctopus dofleini OX=267067 PE=4 SV=2	Q9BJ58	Hemocyanin G-type (Fragment) OS=Enteroctopus dofleini OX=267067 PE=4 SV=2	0	4	4	0.3084	0	1	1	1	623.786	2492.12	2492.13	-2.61	-0.00162	0/0	0	0	374797	HCD (High Energy Collision Dissociation)	MS2	86.1722	53.371	38.9683	7265	7265	7257	MCMMCM34021207.raw	F7	605	3.34	1	0.0001881	2.43x10⁻⁴	1.261
High	Sequest HT	Sequest HT (A2)	A	2	Unambiguous	TCDWITDQTHCVR	TcDWITDQTHcVR	C2(Carbamidomethyl); C11(Carbamidomethyl)	4	Cluster-58773.104036;orf1 len=472 frame:2 start:236 end:1651 gi	676467051 ref|XP_009057764.1| hypothetical protein LOTGIDRAFT_233460 [Lottia gigantea]>gi|556103059|gb|ESO91711.1| hypothetical protein LOTGIDRAFT_233460 [Lottia gigantea]	Cluster-58773.104035;orf1 len=329 frame:-2 start:989 end:3 gi; Cluster-58773.104036;orf1 len=472 frame:2 start:236 end:1651 gi; A0A7E6FBH5; A0A7E6FAS5	820838576 ref|XP_012350325.1| PREDICTED: peritrophin-48-like [Apis florea]; 676467051 ref|XP_009057764.1| hypothetical protein LOTGIDRAFT_233460 [Lottia gigantea]>gi|556103059|gb|ESO91711.1| hypothetical protein LOTGIDRAFT_233460 [Lottia gigantea]; asparagine-rich protein-like isoform X2 OS=Octopus vulgaris OX=6645 GN=LOC118765988 PE=4 SV=1; uncharacterized protein LOC118765988 isoform X1 OS=Octo…	0	3	3	0.5757	0	1	1	1	564.581	1691.73	1691.73	0.56	0.00032	0/0	0	0	4717486	HCD (High Energy Collision Dissociation)	MS2	2.96181	9.213	38.9458	7259	7259	7257	MCMMCM34021207.raw	F7	293	3.7	1	0.0001881	2.41x10⁻⁵	1.655
High	Sequest HT	Sequest HT (A2)	A	2	Unambiguous	VNPTESNVVNTDEIK	VNPTESNVVNTDEIK		1	A0A6P7T161	uncharacterized protein LOC115218089 OS=Octopus vulgaris OX=6645 GN=LOC115218089 PE=4 SV=1	A0A6P7T161	uncharacterized protein LOC115218089 OS=Octopus vulgaris OX=6645 GN=LOC115218089 PE=4 SV=1	0	2	2	0.5556	0	1	1	1	829.916	1658.82	1658.82	0.75	0.00063	0/0	0	0	399526	HCD (High Energy Collision Dissociation)	MS2	7.99658	100	38.8	7230	7230	7224	MCMMCM34021207.raw	F7	1315	2.88	1	0.0001881	1.39x10⁻⁶	2.141
High	Sequest HT	Sequest HT (A2)	A	2	Unambiguous	SIGSISGNQGTGWK	SIGSISGNQGTGWK		2	A0A6P7S478	MAM and LDL-receptor class A domain-containing protein 2-like OS=Octopus vulgaris OX=6645 GN=LOC115209054 PE=4 SV=1	A0A6P7S478; Cluster-58773.171679;orf1 len=1989 frame:1 start:136 end:6102 gi	MAM and LDL-receptor class A domain-containing protein 2-like OS=Octopus vulgaris OX=6645 GN=LOC115209054 PE=4 SV=1; 762072686 ref|XP_011431618.1| PREDICTED: MAM and LDL-receptor class A domain-containing protein 2-like [Crassostrea gigas]	0	2	2	0.6476	0	1	1	1	696.348	1391.69	1391.69	-1.54	-0.00107	0/0	0	0	417613	HCD (High Energy Collision Dissociation)	MS2	5.60867	100	38.7327	7217	7217	7213	MCMMCM34021207.raw	F7	1535	3.49	1	0.0001881	5.92x10⁻⁶	1.894
High	Sequest HT	Sequest HT (A2)	A	2	Unambiguous	TLQDHNVPCAVCLTR	TLQDHNVPcAVcLTR	C9(Carbamidomethyl); C12(Carbamidomethyl)	2	A0A0L8GIJ6	Uncharacterized protein OS=Octopus bimaculoides OX=37653 GN=OCBIM_22032865mg PE=4 SV=1	A0A0L8GIJ6; A0A6P7T8X2	Uncharacterized protein OS=Octopus bimaculoides OX=37653 GN=OCBIM_22032865mg PE=4 SV=1; short-chain collagen C4 OS=Octopus vulgaris OX=6645 GN=LOC115221350 PE=4 SV=1	0	3	3	0.3539	0	1	1	1	595.29	1783.86	1783.86	-0.82	-0.00049	0/0	0	0	598364	HCD (High Energy Collision Dissociation)	MS2	18.4388	72.205	38.6801	7207	7207	7202	MCMMCM34021207.raw	F7	1232	4.69	1	0.0001881	3.24x10⁻⁵	1.604
High	Sequest HT	Sequest HT (A2)	A	2	Unambiguous	KDIDVDIPLNHIRR	KDIDVDIPLNHIRR		4	A0A6P7SER3; A0A6P7SDC4; Cluster-58773.162319;orf1 len=2921 frame:3 start:24 end:8786 gi	hemocyanin 1-like OS=Octopus vulgaris OX=6645 GN=LOC115212215 PE=4 SV=2 hemocyanin G-type, units Oda to Odg OS=Octopus vulgaris OX=6645 GN=LOC115211670 PE=4 SV=2 16596797 gb|AAK28276.2| hemocyanin G-type [Enteroctopus dofleini]	A0A6P7SER3; Cluster-58773.162316;orf1 len=2526 frame:3 start:24 end:7601 gi; A0A6P7SDC4; Cluster-58773.162319;orf1 len=2921 frame:3 start:24 end:8786 gi	hemocyanin 1-like OS=Octopus vulgaris OX=6645 GN=LOC115212215 PE=4 SV=2; 16596797 gb|AAK28276.2| hemocyanin G-type [Enteroctopus dofleini]; hemocyanin G-type, units Oda to Odg OS=Octopus vulgaris OX=6645 GN=LOC115211670 PE=4 SV=2; 16596797 gb|AAK28276.2| hemocyanin G-type [Enteroctopus dofleini]	2	4	4	0.58	0	1	1	1	426.744	1703.95	1703.96	-1.16	-0.00049	0/0	0	0	365728	HCD (High Energy Collision Dissociation)	MS2	16.2577	100	38.6219	7196	7196	7191	MCMMCM34021207.raw	F7	785	4.5	3	0.0001881	6.01x10⁻⁴	1.106
High	Sequest HT	Sequest HT (A2)	A	2	Unambiguous	LEVYQQLK	LEVYQQLK		4	Cluster-58773.104036;orf1 len=472 frame:2 start:236 end:1651 gi	676467051 ref|XP_009057764.1| hypothetical protein LOTGIDRAFT_233460 [Lottia gigantea]>gi|556103059|gb|ESO91711.1| hypothetical protein LOTGIDRAFT_233460 [Lottia gigantea]	Cluster-58773.104035;orf1 len=329 frame:-2 start:989 end:3 gi; Cluster-58773.104036;orf1 len=472 frame:2 start:236 end:1651 gi; A0A7E6FBH5; A0A7E6FAS5	820838576 ref|XP_012350325.1| PREDICTED: peritrophin-48-like [Apis florea]; 676467051 ref|XP_009057764.1| hypothetical protein LOTGIDRAFT_233460 [Lottia gigantea]>gi|556103059|gb|ESO91711.1| hypothetical protein LOTGIDRAFT_233460 [Lottia gigantea]; asparagine-rich protein-like isoform X2 OS=Octopus vulgaris OX=6645 GN=LOC118765988 PE=4 SV=1; uncharacterized protein LOC118765988 isoform X1 OS=Octo…	0	2	2	0.2932	0	1	1	1	510.79	1020.57	1020.57	-0.58	-0.0003	0/0	0	0	5.19766e+06	HCD (High Energy Collision Dissociation)	MS2	9.00507	11.395	38.5571	7182	7182	7180	MCMMCM34021207.raw	F7	983	1.91	1	0.0001881	1.85x10⁻²	0.519
High	Sequest HT	Sequest HT (A2)	A	2	Unambiguous	DTNPISLTK	DTNPISLTK		7	A0A6P7SER3; Q9BJ58; O61363; A0A6P7SDC4; Q5XLV2; Cluster-58773.162319;orf1 len=2921 frame:3 start:24 end:8786 gi	hemocyanin 1-like OS=Octopus vulgaris OX=6645 GN=LOC115212215 PE=4 SV=2 Hemocyanin G-type (Fragment) OS=Enteroctopus dofleini OX=267067 PE=4 SV=2 Hemocyanin G-type, units Oda to Odg OS=Enteroctopus dofleini OX=267067 GN=ODHCY PE=1 SV=1 hemocyanin G-type, units Oda to Odg OS=Octopus vulgaris OX=6645 GN=LOC115211670 PE=4 SV=2 Hemocyanin A-type (Fragment) OS=Enteroctopus dofleini OX=267067 GN=HA PE=…	A0A6P7SER3; Cluster-58773.162316;orf1 len=2526 frame:3 start:24 end:7601 gi; Q9BJ58; O61363; A0A6P7SDC4; Q5XLV2; Cluster-58773.162319;orf1 len=2921 frame:3 start:24 end:8786 gi	hemocyanin 1-like OS=Octopus vulgaris OX=6645 GN=LOC115212215 PE=4 SV=2; 16596797 gb|AAK28276.2| hemocyanin G-type [Enteroctopus dofleini]; Hemocyanin G-type (Fragment) OS=Enteroctopus dofleini OX=267067 PE=4 SV=2; Hemocyanin G-type, units Oda to Odg OS=Enteroctopus dofleini OX=267067 GN=ODHCY PE=1 SV=1; hemocyanin G-type, units Oda to Odg OS=Octopus vulgaris OX=6645 GN=LOC115211670 PE=4 SV=2; He…	0	2	2	0.528	0	1	1	1	494.769	988.531	988.531	0.23	0.00011	0/0	0	0	39285364	HCD (High Energy Collision Dissociation)	MS2	0.351254	1.457	38.5543	7181	7181	7180	MCMMCM34021207.raw	F7	1507	2.14	6	0.0001881	1.83x10⁻²	0.521
High	Sequest HT	Sequest HT (A2)	A	2	Unambiguous	QHITQDTDDELKEAFR	QHITQDTDDELKEAFR		5	A0A6P7SWF4	calmodulin isoform X1 OS=Octopus vulgaris OX=6645 GN=LOC115217131 PE=4 SV=1	Cluster-58773.191100;orf1 len=81 frame:-3 start:411 end:169 gi; Cluster-58773.191101;orf1 len=184 frame:1 start:112 end:663 gi; A0A6P7SWF4; A0A6P7SWI6; Cluster-58773.191099;orf1 len=153 frame:3 start:369 end:827 gi	389565944 gb|AFK83801.1| calmodulin [Mnemiopsis leidyi]; 389565944 gb|AFK83801.1| calmodulin [Mnemiopsis leidyi]; calmodulin isoform X1 OS=Octopus vulgaris OX=6645 GN=LOC115217131 PE=4 SV=1; calmodulin isoform X2 OS=Octopus vulgaris OX=6645 GN=LOC115217131 PE=4 SV=1; 389565944 gb|AFK83801.1| calmodulin [Mnemiopsis leidyi]	1	3	3	0.695	0	1	1	1	649.313	1945.92	1945.93	-0.48	-0.00031	0/0	0	0	222545	HCD (High Energy Collision Dissociation)	MS2	38.4514	100	38.5314	7178	7178	7169	MCMMCM34021207.raw	F7	1096	4.23	1	0.0001881	4.84x10⁻⁶	1.928
High	Sequest HT	Sequest HT (A2)	A	2	Unambiguous	VYGPNGKPYSPDAQVYGPDGR	VYGPNGKPYSPDAQVYGPDGR		1	Cluster-58773.139722;orf1 len=305 frame:2 start:2 end:916 gi	558118597 ref|XP_006113633.1| PREDICTED: LOW QUALITY PROTEIN: neuroblast differentiation-associated protein AHNAK-like [Pelodiscus sinensis]	Cluster-58773.139722;orf1 len=305 frame:2 start:2 end:916 gi	558118597 ref|XP_006113633.1| PREDICTED: LOW QUALITY PROTEIN: neuroblast differentiation-associated protein AHNAK-like [Pelodiscus sinensis]	0	3	3	0.5148	0	1	1	1	746.36	2237.07	2237.06	1.95	0.00145	0/0	0	0	130269	HCD (High Energy Collision Dissociation)	MS2	15.83	100	38.5267	7177	7177	7169	MCMMCM34021207.raw	F7	1254	3.05	1	0.0001881	5.35x10⁻⁴	1.126
High	Sequest HT	Sequest HT (A2)	A	2	Unambiguous	EGESITLVCK	EGESITLVcK	C9(Carbamidomethyl)	15	A0A7E6FHV2	neural cell adhesion molecule 2 isoform X3 OS=Octopus vulgaris OX=6645 GN=LOC115221317 PE=4 SV=1	Cluster-58773.115818;orf1 len=757 frame:2 start:713 end:2983 gi; A0A7E6FHV2; A0A7E6FJ69; A0A7E6FH76; A0A6P7T943; A0A6P7T942; A0A7E6FGQ6; A0A7E6FH81; A0A0L8G9E5; A0A7E6FGR2; A0A6P7T8T2; A0A7E6FGT6; A0A7E6FGT3; A0A7E6FHV7; A0A6P7TB45	780187690 ref|XP_011662955.1| PREDICTED: hemicentin-1 [Strongylocentrotus purpuratus]; neural cell adhesion molecule 2 isoform X3 OS=Octopus vulgaris OX=6645 GN=LOC115221317 PE=4 SV=1; neural cell adhesion molecule 2 isoform X5 OS=Octopus vulgaris OX=6645 GN=LOC115221317 PE=4 SV=1; neural cell adhesion molecule 2 isoform X1 OS=Octopus vulgaris OX=6645 GN=LOC115221317 PE=4 SV=1; neural cell adhesi…	0	2	2	0.507	0	1	1	1	568.286	1135.56	1135.57	-1.28	-0.00072	0/0	0	0	493239	HCD (High Energy Collision Dissociation)	MS2	14.4224	100	38.5084	7173	7173	7169	MCMMCM34021207.raw	F7	1341	2.15	1	0.0001881	2.50x10⁻³	0.864
High	Sequest HT	Sequest HT (A2)	A	2	Unambiguous	VPAINVNDSVTK	VPAINVNDSVTK		6	A0A6P7SUK9	Adenosylhomocysteinase OS=Octopus vulgaris OX=6645 GN=LOC115216611 PE=3 SV=1	Cluster-58773.178418;orf1 len=486 frame:2 start:1070 end:2527 gi; Cluster-106927.21;orf1 len=525 frame:-3 start:5774 end:4200 gi; A0A6P7SUI0; A0A6P7SUK9; A0A0L8G425; Cluster-106927.27;orf1 len=391 frame:1 start:1 end:1173 gi	548344049 ref|XP_005724446.1| PREDICTED: adenosylhomocysteinase B-like [Pundamilia nyererei]; 602706501 ref|XP_007463530.1| PREDICTED: adenosylhomocysteinase-like [Lipotes vexillifer]; Adenosylhomocysteinase OS=Octopus vulgaris OX=6645 GN=LOC115216611 PE=3 SV=1; Adenosylhomocysteinase OS=Octopus vulgaris OX=6645 GN=LOC115216611 PE=3 SV=1; Adenosylhomocysteinase OS=Octopus bimaculoides OX=37653 GN…	0	2	2	0.7251	0	1	1	1	628.845	1256.68	1256.68	-0.8	-0.0005	0/0	0	0	888803	HCD (High Energy Collision Dissociation)	MS2	34.7163	79.969	38.4961	7170	7170	7169	MCMMCM34021207.raw	F7	1093	3.42	1	0.0001881	1.38x10⁻⁵	1.749
High	Sequest HT	Sequest HT (A2)	A	2	Unambiguous	ELQEQLEAIRR	ELQEQLEAIRR		6	Cluster-58773.180614;orf1 len=593 frame:1 start:1273 end:3051 gi	762078274 ref|XP_011453109.1| PREDICTED: radixin-like isoform X3 [Crassostrea gigas]>gi|762078276|ref|XP_011453118.1| PREDICTED: radixin-like isoform X4 [Crassostrea gigas]	A0A6P7TVA5; A0A6P7TLG6; A0A7E6FS61; Cluster-58773.180614;orf1 len=593 frame:1 start:1273 end:3051 gi; A0A7E6FS44; Cluster-58773.180608;orf1 len=592 frame:1 start:1282 end:3057 gi	moesin isoform X4 OS=Octopus vulgaris OX=6645 GN=LOC115225885 PE=4 SV=1; moesin isoform X3 OS=Octopus vulgaris OX=6645 GN=LOC115225885 PE=4 SV=1; moesin isoform X2 OS=Octopus vulgaris OX=6645 GN=LOC115225885 PE=4 SV=1; 762078274 ref|XP_011453109.1| PREDICTED: radixin-like isoform X3 [Crassostrea gigas]>gi|762078276|ref|XP_011453118.1| PREDICTED: radixin-like isoform X4 [Crassostrea gigas]; moesin…	1	3	3	0.4022	0	1	1	1	462.256	1384.75	1384.75	-1.33	-0.00062	0/0	0	0	393563	HCD (High Energy Collision Dissociation)	MS2	8.10792	100	38.4165	7156	7156	7147	MCMMCM34021207.raw	F7	1189	2.76	1	0.0001881	3.66x10⁻³	0.798
High	Sequest HT	Sequest HT (A2)	A	2	Unambiguous	ECDLQKPCVCGENEEISSTADCEPK	EcDLQKPcVcGENEEISSTADcEPK	C2(Carbamidomethyl); C8(Carbamidomethyl); C10(Carbamidomethyl); C22(Carbamidomethyl)	4	A0A7E6FK29; Cluster-58773.176632;orf1 len=807 frame:1 start:1 end:2421 gi	mucin-19-like OS=Octopus vulgaris OX=6645 GN=LOC115224399 PE=4 SV=1 657741131 ref|XP_008305640.1| PREDICTED: LOW QUALITY PROTEIN: SCO-spondin [Cynoglossus semilaevis]	Cluster-58773.176631;orf1 len=308 frame:-2 start:961 end:38 gi; Cluster-58773.176634;orf1 len=801 frame:1 start:1 end:2403 gi; A0A7E6FK29; Cluster-58773.176632;orf1 len=807 frame:1 start:1 end:2421 gi	634897887 ref|XP_007956867.1| PREDICTED: LOW QUALITY PROTEIN: SCO-spondin [Orycteropus afer afer]; 657741131 ref|XP_008305640.1| PREDICTED: LOW QUALITY PROTEIN: SCO-spondin [Cynoglossus semilaevis]; mucin-19-like OS=Octopus vulgaris OX=6645 GN=LOC115224399 PE=4 SV=1; 657741131 ref|XP_008305640.1| PREDICTED: LOW QUALITY PROTEIN: SCO-spondin [Cynoglossus semilaevis]	0	3	3	0.5202	0	1	1	1	985.743	2955.21	2955.21	1.24	0.00122	0/0	0	0	949589	HCD (High Energy Collision Dissociation)	MS2	0	29.881	38.387	7149	7149	7147	MCMMCM34021207.raw	F7	118	4.21	2	0.0001881	1.16x10⁻⁶	2.172
High	Sequest HT	Sequest HT (A2)	A	2	Unambiguous	TCDWITDQTHCVR	TcDWITDQTHcVR	C2(Carbamidomethyl); C11(Carbamidomethyl)	4	Cluster-58773.104036;orf1 len=472 frame:2 start:236 end:1651 gi	676467051 ref|XP_009057764.1| hypothetical protein LOTGIDRAFT_233460 [Lottia gigantea]>gi|556103059|gb|ESO91711.1| hypothetical protein LOTGIDRAFT_233460 [Lottia gigantea]	Cluster-58773.104035;orf1 len=329 frame:-2 start:989 end:3 gi; Cluster-58773.104036;orf1 len=472 frame:2 start:236 end:1651 gi; A0A7E6FBH5; A0A7E6FAS5	820838576 ref|XP_012350325.1| PREDICTED: peritrophin-48-like [Apis florea]; 676467051 ref|XP_009057764.1| hypothetical protein LOTGIDRAFT_233460 [Lottia gigantea]>gi|556103059|gb|ESO91711.1| hypothetical protein LOTGIDRAFT_233460 [Lottia gigantea]; asparagine-rich protein-like isoform X2 OS=Octopus vulgaris OX=6645 GN=LOC118765988 PE=4 SV=1; uncharacterized protein LOC118765988 isoform X1 OS=Octo…	0	2	2	0.7929	0	1	1	1	846.367	1691.73	1691.73	0.36	0.00031	0/0	0	0	1.0729e+06	HCD (High Energy Collision Dissociation)	MS2	0	68.725	39.0087	7273	7273	7268	MCMMCM34021207.raw	F7	293	3.67	1	0.0001881	2.24x10⁻⁶	2.06
High	Sequest HT	Sequest HT (A2)	A	2	Unambiguous	SPTNIKNWTLTQR	SPTNIKNWTLTQR		6	A0A7E6FJC7; A0A6P7TDP2	70 kDa neurofilament protein-like isoform X4 OS=Octopus vulgaris OX=6645 GN=LOC115222739 PE=3 SV=1 70 kDa neurofilament protein isoform X1 OS=Octopus vulgaris OX=6645 GN=LOC115222954 PE=3 SV=1	A0A7E6FJ41; A0A7E6FJC7; A0A6P7TDP2; A0A7E6FIZ4; Cluster-58773.158797;orf1 len=321 frame:2 start:2 end:964 gi; Cluster-58773.158796;orf1 len=334 frame:1 start:679 end:1680 gi	70 kDa neurofilament protein isoform X2 OS=Octopus vulgaris OX=6645 GN=LOC115222954 PE=3 SV=1; 70 kDa neurofilament protein-like isoform X4 OS=Octopus vulgaris OX=6645 GN=LOC115222739 PE=3 SV=1; 70 kDa neurofilament protein isoform X1 OS=Octopus vulgaris OX=6645 GN=LOC115222954 PE=3 SV=1; 70 kDa neurofilament protein-like isoform X2 OS=Octopus vulgaris OX=6645 GN=LOC115222739 PE=3 SV=1; 159741 gb…	1	3	3	0.5709	0	1	1	1	520.283	1558.83	1558.83	0.1	5e-05	0/0	0	0	360229	HCD (High Energy Collision Dissociation)	MS2	36.0391	93.94	39.0221	7276	7276	7268	MCMMCM34021207.raw	F7	1421	2.68	2	0.0001881	1.90x10⁻⁴	1.303
High	Sequest HT	Sequest HT (A2)	A	2	Unambiguous	ISAHQLGEVLR	ISAHQLGEVLR		5	A0A6P7SU30	myosin-2 essential light chain isoform X2 OS=Octopus vulgaris OX=6645 GN=LOC115216469 PE=4 SV=1	Cluster-58773.186489;orf1 len=185 frame:2 start:218 end:772 gi; Cluster-58773.186488;orf1 len=168 frame:2 start:218 end:721 gi; Cluster-58773.186487;orf1 len=182 frame:2 start:218 end:763 gi; A0A6P7SU30; A0A6P7STT8	405972312 gb|EKC37087.1| Myosin-2 essential light chain [Crassostrea gigas]; 405972312 gb|EKC37087.1| Myosin-2 essential light chain [Crassostrea gigas]; 405972312 gb|EKC37087.1| Myosin-2 essential light chain [Crassostrea gigas]; myosin-2 essential light chain isoform X2 OS=Octopus vulgaris OX=6645 GN=LOC115216469 PE=4 SV=1; myosin-2 essential light chain isoform X1 OS=Octopus vulgaris OX=6645 G…	0	3	3	0.4234	0	1	1	1	408.234	1222.69	1222.69	-1.26	-0.00051	0/0	0	0	418635	HCD (High Energy Collision Dissociation)	MS2	2.59166	100	39.0266	7277	7277	7268	MCMMCM34021207.raw	F7	790	3.59	1	0.0001881	2.22x10⁻³	0.883
High	Sequest HT	Sequest HT (A2)	A	2	Unambiguous	SDHGFQTIAGYHGSTMCPSPDDPK	SDHGFQTIAGYHGSTMcPSPDDPK	C17(Carbamidomethyl)	4	A0A6P7SER3; A0A6P7SDC4; Cluster-58773.162319;orf1 len=2921 frame:3 start:24 end:8786 gi	hemocyanin 1-like OS=Octopus vulgaris OX=6645 GN=LOC115212215 PE=4 SV=2 hemocyanin G-type, units Oda to Odg OS=Octopus vulgaris OX=6645 GN=LOC115211670 PE=4 SV=2 16596797 gb|AAK28276.2| hemocyanin G-type [Enteroctopus dofleini]	A0A6P7SER3; Cluster-58773.162316;orf1 len=2526 frame:3 start:24 end:7601 gi; A0A6P7SDC4; Cluster-58773.162319;orf1 len=2921 frame:3 start:24 end:8786 gi	hemocyanin 1-like OS=Octopus vulgaris OX=6645 GN=LOC115212215 PE=4 SV=2; 16596797 gb|AAK28276.2| hemocyanin G-type [Enteroctopus dofleini]; hemocyanin G-type, units Oda to Odg OS=Octopus vulgaris OX=6645 GN=LOC115211670 PE=4 SV=2; 16596797 gb|AAK28276.2| hemocyanin G-type [Enteroctopus dofleini]	0	4	4	0.6705	0	1	1	1	652.033	2605.11	2605.11	0.58	0.00038	0/0	0	0	13981175	HCD (High Energy Collision Dissociation)	MS2	0.0685269	2.023	39.0504	7280	7280	7279	MCMMCM34021207.raw	F7	214	4.34	3	0.0001881	5.41x10⁻⁵	1.517
High	Sequest HT	Sequest HT (A2)	A	2	Unambiguous	SVIRDESFPLK	SVIRDESFPLK		5	A0A6P7SI10; Cluster-58773.163438;orf1 len=994 frame:2 start:254 end:3235 gi; A0A0L8HDR3	CD109 antigen isoform X2 OS=Octopus vulgaris OX=6645 GN=LOC115213260 PE=4 SV=1 410935705 gb|AFV94409.1| thioester-containing protein 1 [Euprymna scolopes] Uncharacterized protein (Fragment) OS=Octopus bimaculoides OX=37653 GN=OCBIM_22017223mg PE=4 SV=1	A0A6P7SI10; A0A7E6F3R1; Cluster-58773.163438;orf1 len=994 frame:2 start:254 end:3235 gi; A0A0L8HDR3; Cluster-58773.160937;orf1 len=552 frame:-3 start:1658 end:3 gi	CD109 antigen isoform X2 OS=Octopus vulgaris OX=6645 GN=LOC115213260 PE=4 SV=1; CD109 antigen isoform X1 OS=Octopus vulgaris OX=6645 GN=LOC115213260 PE=4 SV=1; 410935705 gb|AFV94409.1| thioester-containing protein 1 [Euprymna scolopes]; Uncharacterized protein (Fragment) OS=Octopus bimaculoides OX=37653 GN=OCBIM_22017223mg PE=4 SV=1; 410935705 gb|AFV94409.1| thioester-containing protein 1 [Euprym…	1	3	3	0.2193	0	1	1	1	430.906	1290.7	1290.71	-1.41	-0.00061	0/0	0	0	681885	HCD (High Energy Collision Dissociation)	MS2	2.75651	79.898	39.5433	7385	7385	7378	MCMMCM34021207.raw	F7	1273	2.28	3	0.0001881	8.67x10⁻³	0.65
High	Sequest HT	Sequest HT (A2)	A	2	Unambiguous	THIFTNGNVFGASK	THIFTNGNVFGASK		1	Cluster-58773.233179;orf1 len=78 frame:2 start:2 end:235 gi	159741 gb|AAA16613.1| omega-crystallin [Enteroctopus dofleini]	Cluster-58773.233179;orf1 len=78 frame:2 start:2 end:235 gi	159741 gb|AAA16613.1| omega-crystallin [Enteroctopus dofleini]	0	3	3	0.442	0	1	1	1	498.256	1492.75	1492.75	-1.24	-0.00062	0/0	0	0	445312	HCD (High Energy Collision Dissociation)	MS2	16.8458	100	39.4958	7375	7375	7367	MCMMCM34021207.raw	F7	1479	2.24	1	0.0001881	3.57x10⁻³	0.802
High	Sequest HT	Sequest HT (A2)	A	2	Unambiguous	VYDVEPDMTR	VYDVEPDMTR		2	A0A6P7SJH5	cytosolic non-specific dipeptidase OS=Octopus vulgaris OX=6645 GN=LOC115213824 PE=3 SV=1	Cluster-58773.186313;orf1 len=502 frame:3 start:3 end:1508 gi; A0A6P7SJH5	762128030 ref|XP_011447108.1| PREDICTED: cytosolic non-specific dipeptidase-like [Crassostrea gigas]; cytosolic non-specific dipeptidase OS=Octopus vulgaris OX=6645 GN=LOC115213824 PE=3 SV=1	0	2	2	0.511	0	1	1	1	612.781	1224.55	1224.56	-1.62	-0.00099	0/0	0	0	564662	HCD (High Energy Collision Dissociation)	MS2	13.3297	78.857	39.44	7364	7364	7356	MCMMCM34021207.raw	F7	560	2.27	1	0.0001881	1.84x10⁻⁴	1.309
High	Sequest HT	Sequest HT (A2)	A	2	Unambiguous	KTWDDVQTDFK	KTWDDVQTDFK		4	A0A6P7TFQ1	Tetraspanin OS=Octopus vulgaris OX=6645 GN=LOC115222869 PE=3 SV=1	Cluster-58773.138742;orf1 len=239 frame:1 start:79 end:795 gi; A0A6P7TFQ1; Cluster-58773.138741;orf1 len=249 frame:1 start:79 end:825 gi; A0A0L8FQM7	506968275 gb|AGM32481.1| tetraspanin D107 [Coptotermes formosanus]; Tetraspanin OS=Octopus vulgaris OX=6645 GN=LOC115222869 PE=3 SV=1; 506968275 gb|AGM32481.1| tetraspanin D107 [Coptotermes formosanus]; Tetraspanin (Fragment) OS=Octopus bimaculoides OX=37653 GN=OCBIM_22010667mg PE=3 SV=1	1	2	2	0.6192	0	1	1	1	691.833	1382.66	1382.66	-0.07	-5e-05	0/0	0	0	616279	HCD (High Energy Collision Dissociation)	MS2	8.00734	94.27	39.4355	7363	7363	7356	MCMMCM34021207.raw	F7	994	3.44	1	0.0001881	2.18x10⁻⁵	1.671
High	Sequest HT	Sequest HT (A2)	A	2	Unambiguous	YNSANCAIETLR	YNSANcAIETLR	C6(Carbamidomethyl)	8	A0A0L8GNM6; A0A6P7SER3; Q9BJ58; O61363; A0A6P7SDC4; Q5XLV2; Cluster-58773.162319;orf1 len=2921 frame:3 start:24 end:8786 gi	Uncharacterized protein OS=Octopus bimaculoides OX=37653 GN=OCBIM_22031096mg PE=4 SV=1 hemocyanin 1-like OS=Octopus vulgaris OX=6645 GN=LOC115212215 PE=4 SV=2 Hemocyanin G-type (Fragment) OS=Enteroctopus dofleini OX=267067 PE=4 SV=2 Hemocyanin G-type, units Oda to Odg OS=Enteroctopus dofleini OX=267067 GN=ODHCY PE=1 SV=1 hemocyanin G-type, units Oda to Odg OS=Octopus vulgaris OX=6645 GN=LOC115211…	A0A0L8GNM6; A0A6P7SER3; Cluster-58773.162316;orf1 len=2526 frame:3 start:24 end:7601 gi; Q9BJ58; O61363; A0A6P7SDC4; Q5XLV2; Cluster-58773.162319;orf1 len=2921 frame:3 start:24 end:8786 gi	Uncharacterized protein OS=Octopus bimaculoides OX=37653 GN=OCBIM_22031096mg PE=4 SV=1; hemocyanin 1-like OS=Octopus vulgaris OX=6645 GN=LOC115212215 PE=4 SV=2; 16596797 gb|AAK28276.2| hemocyanin G-type [Enteroctopus dofleini]; Hemocyanin G-type (Fragment) OS=Enteroctopus dofleini OX=267067 PE=4 SV=2; Hemocyanin G-type, units Oda to Odg OS=Enteroctopus dofleini OX=267067 GN=ODHCY PE=1 SV=1; hemoc…	0	3	3	0.6264	0	1	1	1	471.225	1411.66	1411.66	-1.19	-0.00056	0/0	0	0	753857	HCD (High Energy Collision Dissociation)	MS2	3.54778	59.474	39.4271	7361	7361	7356	MCMMCM34021207.raw	F7	954	3.56	7	0.0001881	9.16x10⁻⁴	1.035
High	Sequest HT	Sequest HT (A2)	A	2	Unambiguous	IESHNPFNHGHISFISEDTMTK	IESHNPFNHGHISFISEDTmTK	M20(Oxidation)	4	A0A6P7SER3; A0A6P7SDC4; Cluster-58773.162319;orf1 len=2921 frame:3 start:24 end:8786 gi	hemocyanin 1-like OS=Octopus vulgaris OX=6645 GN=LOC115212215 PE=4 SV=2 hemocyanin G-type, units Oda to Odg OS=Octopus vulgaris OX=6645 GN=LOC115211670 PE=4 SV=2 16596797 gb|AAK28276.2| hemocyanin G-type [Enteroctopus dofleini]	A0A6P7SER3; Cluster-58773.162316;orf1 len=2526 frame:3 start:24 end:7601 gi; A0A6P7SDC4; Cluster-58773.162319;orf1 len=2921 frame:3 start:24 end:8786 gi	hemocyanin 1-like OS=Octopus vulgaris OX=6645 GN=LOC115212215 PE=4 SV=2; 16596797 gb|AAK28276.2| hemocyanin G-type [Enteroctopus dofleini]; hemocyanin G-type, units Oda to Odg OS=Octopus vulgaris OX=6645 GN=LOC115211670 PE=4 SV=2; 16596797 gb|AAK28276.2| hemocyanin G-type [Enteroctopus dofleini]	0	4	4	0.3299	0	1	1	1	640.05	2557.18	2557.18	-0.47	-0.0003	0/0	0	0	1.46436e+06	HCD (High Energy Collision Dissociation)	MS2	1.01551	18.354	39.4172	7358	7358	7356	MCMMCM34021207.raw	F7	796	3.94	3	0.0001881	5.52x10⁻⁵	1.513
High	Sequest HT	Sequest HT (A2)	A	2	Unambiguous	IINTVQFQR	IINTVQFQR		4	A0A6P7U1Y0	deoxynucleoside triphosphate triphosphohydrolase SAMHD1-like OS=Octopus vulgaris OX=6645 GN=LOC115232247 PE=4 SV=1	A0A6P7U4P1; A0A6P7U1Y0; Cluster-58773.193142;orf1 len=91 frame:1 start:298 end:570 gi; A0A6P7TXT0	deoxynucleoside triphosphate triphosphohydrolase SAMHD1-like isoform X2 OS=Octopus vulgaris OX=6645 GN=LOC115231345 PE=4 SV=1; deoxynucleoside triphosphate triphosphohydrolase SAMHD1-like OS=Octopus vulgaris OX=6645 GN=LOC115232247 PE=4 SV=1; 762149402 ref|XP_011412641.1| PREDICTED: deoxynucleoside triphosphate triphosphohydrolase SAMHD1-like [Crassostrea gigas]; deoxynucleoside triphosphate trip…	0	2	2	0.4051	0	1	1	1	559.819	1118.63	1118.63	-0.94	-0.00052	0/0	0	0	514502	HCD (High Energy Collision Dissociation)	MS2	3.19695	100	39.3734	7350	7350	7345	MCMMCM34021207.raw	F7	1170	2.74	1	0.0001881	1.77x10⁻³	0.922
High	Sequest HT	Sequest HT (A2)	A	2	Unambiguous	YNSANCAIETLR	YNSANcAIETLR	C6(Carbamidomethyl)	8	A0A0L8GNM6; A0A6P7SER3; Q9BJ58; O61363; A0A6P7SDC4; Q5XLV2; Cluster-58773.162319;orf1 len=2921 frame:3 start:24 end:8786 gi	Uncharacterized protein OS=Octopus bimaculoides OX=37653 GN=OCBIM_22031096mg PE=4 SV=1 hemocyanin 1-like OS=Octopus vulgaris OX=6645 GN=LOC115212215 PE=4 SV=2 Hemocyanin G-type (Fragment) OS=Enteroctopus dofleini OX=267067 PE=4 SV=2 Hemocyanin G-type, units Oda to Odg OS=Enteroctopus dofleini OX=267067 GN=ODHCY PE=1 SV=1 hemocyanin G-type, units Oda to Odg OS=Octopus vulgaris OX=6645 GN=LOC115211…	A0A0L8GNM6; A0A6P7SER3; Cluster-58773.162316;orf1 len=2526 frame:3 start:24 end:7601 gi; Q9BJ58; O61363; A0A6P7SDC4; Q5XLV2; Cluster-58773.162319;orf1 len=2921 frame:3 start:24 end:8786 gi	Uncharacterized protein OS=Octopus bimaculoides OX=37653 GN=OCBIM_22031096mg PE=4 SV=1; hemocyanin 1-like OS=Octopus vulgaris OX=6645 GN=LOC115212215 PE=4 SV=2; 16596797 gb|AAK28276.2| hemocyanin G-type [Enteroctopus dofleini]; Hemocyanin G-type (Fragment) OS=Enteroctopus dofleini OX=267067 PE=4 SV=2; Hemocyanin G-type, units Oda to Odg OS=Enteroctopus dofleini OX=267067 GN=ODHCY PE=1 SV=1; hemoc…	0	2	2	0.671	0	1	1	1	706.336	1411.66	1411.66	0.97	0.00069	0/0	0	0	4.08617e+06	HCD (High Energy Collision Dissociation)	MS2	5.03118	16.149	39.359	7346	7346	7345	MCMMCM34021207.raw	F7	968	3.86	7	0.0001881	1.22x10⁻⁵	1.771
High	Sequest HT	Sequest HT (A2)	A	2	Unambiguous	KLECMNSVWQQR	KLEcMNSVWQQR	C4(Carbamidomethyl)	5	A0A7E6FK29	mucin-19-like OS=Octopus vulgaris OX=6645 GN=LOC115224399 PE=4 SV=1	Cluster-123723.2;orf1 len=507 frame:3 start:2952 end:4472 gi; Cluster-123723.1;orf1 len=564 frame:3 start:2952 end:4643 gi; Cluster-123723.3;orf2 len=488 frame:3 start:2952 end:4415 gi; A0A7E6FK29; Cluster-123723.0;orf2 len=555 frame:3 start:2952 end:4616 gi	762085926 ref|XP_011425282.1| PREDICTED: mucin-17-like [Crassostrea gigas]; 762085926 ref|XP_011425282.1| PREDICTED: mucin-17-like [Crassostrea gigas]; 762085926 ref|XP_011425282.1| PREDICTED: mucin-17-like [Crassostrea gigas]; mucin-19-like OS=Octopus vulgaris OX=6645 GN=LOC115224399 PE=4 SV=1; 762085926 ref|XP_011425282.1| PREDICTED: mucin-17-like [Crassostrea gigas]	1	3	3	0.5863	0	1	1	1	526.922	1578.75	1578.75	-0.73	-0.00038	0/0	0	0	397382	HCD (High Energy Collision Dissociation)	MS2	15.1229	93.888	38.3366	7140	7140	7136	MCMMCM34021207.raw	F7	1150	4.23	1	0.0001881	3.76x10⁻⁴	1.186
High	Sequest HT	Sequest HT (A2)	A	2	Unambiguous	IESHNPFNHGHISFISEDTMTKR	IESHNPFNHGHISFISEDTMTKR		4	A0A6P7SER3; A0A6P7SDC4; Cluster-58773.162319;orf1 len=2921 frame:3 start:24 end:8786 gi	hemocyanin 1-like OS=Octopus vulgaris OX=6645 GN=LOC115212215 PE=4 SV=2 hemocyanin G-type, units Oda to Odg OS=Octopus vulgaris OX=6645 GN=LOC115211670 PE=4 SV=2 16596797 gb|AAK28276.2| hemocyanin G-type [Enteroctopus dofleini]	A0A6P7SER3; Cluster-58773.162316;orf1 len=2526 frame:3 start:24 end:7601 gi; A0A6P7SDC4; Cluster-58773.162319;orf1 len=2921 frame:3 start:24 end:8786 gi	hemocyanin 1-like OS=Octopus vulgaris OX=6645 GN=LOC115212215 PE=4 SV=2; 16596797 gb|AAK28276.2| hemocyanin G-type [Enteroctopus dofleini]; hemocyanin G-type, units Oda to Odg OS=Octopus vulgaris OX=6645 GN=LOC115211670 PE=4 SV=2; 16596797 gb|AAK28276.2| hemocyanin G-type [Enteroctopus dofleini]	1	4	4	0.5826	0	1	1	1	675.076	2697.28	2697.28	-1.03	-0.0007	0/0	0	0	445104	HCD (High Energy Collision Dissociation)	MS2	0	67.059	39.3367	7343	7343	7334	MCMMCM34021207.raw	F7	1024	4.84	3	0.0001881	2.27x10⁻⁵	1.665
High	Sequest HT	Sequest HT (A2)	A	2	Unambiguous	DLETTSPTFSK	DLETTSPTFSK		2	Cluster-58773.172049;orf1 len=413 frame:1 start:1 end:1239 gi	657587462 ref|XP_008298024.1| PREDICTED: heme-binding protein 2-like [Stegastes partitus]	A0A6P7TUI8; Cluster-58773.172049;orf1 len=413 frame:1 start:1 end:1239 gi	uncharacterized protein LOC115225721 OS=Octopus vulgaris OX=6645 GN=LOC115225721 PE=3 SV=1; 657587462 ref|XP_008298024.1| PREDICTED: heme-binding protein 2-like [Stegastes partitus]	0	2	2	0.5789	0	1	1	1	613.301	1225.59	1225.59	-0.51	-0.00031	0/0	0	0	2.94395e+06	HCD (High Energy Collision Dissociation)	MS2	10.9561	22.685	39.3045	7335	7335	7334	MCMMCM34021207.raw	F7	921	2.09	1	0.0001881	4.24x10⁻⁴	1.166
High	Sequest HT	Sequest HT (A2)	A	2	Unambiguous	YDITSSLNK	YDITSSLNK		2	A0A6P7SDC4; Cluster-58773.162319;orf1 len=2921 frame:3 start:24 end:8786 gi	hemocyanin G-type, units Oda to Odg OS=Octopus vulgaris OX=6645 GN=LOC115211670 PE=4 SV=2 16596797 gb|AAK28276.2| hemocyanin G-type [Enteroctopus dofleini]	A0A6P7SDC4; Cluster-58773.162319;orf1 len=2921 frame:3 start:24 end:8786 gi	hemocyanin G-type, units Oda to Odg OS=Octopus vulgaris OX=6645 GN=LOC115211670 PE=4 SV=2; 16596797 gb|AAK28276.2| hemocyanin G-type [Enteroctopus dofleini]	0	2	2	0.3651	0	1	1	1	520.766	1040.53	1040.53	-0.14	-8e-05	0/0	0	0	2417926	HCD (High Energy Collision Dissociation)	MS2	36.7013	24.018	39.2624	7326	7326	7323	MCMMCM34021207.raw	F7	924	2.41	2	0.0001881	2.96x10⁻³	0.835
High	Sequest HT	Sequest HT (A2)	A	2	Unambiguous	ICCYDENTGSLVR	IccYDENTGSLVR	C2(Carbamidomethyl); C3(Carbamidomethyl)	2	A0A6P7T8E9	mucin-like protein OS=Octopus vulgaris OX=6645 GN=LOC115221006 PE=4 SV=1	Cluster-58773.85711;orf1 len=1247 frame:3 start:270 end:4010 gi; A0A6P7T8E9	762151488 ref|XP_011413729.1| PREDICTED: mucin-4-like [Crassostrea gigas]; mucin-like protein OS=Octopus vulgaris OX=6645 GN=LOC115221006 PE=4 SV=1	0	2	2	0.6827	0	1	1	1	793.85	1586.69	1586.69	-0.78	-0.00062	0/0	0	0	2.76935e+06	HCD (High Energy Collision Dissociation)	MS2	2.37587	26.53	39.2001	7313	7313	7312	MCMMCM34021207.raw	F7	384	3.53	1	0.0001881	1.08x10⁻⁶	2.184
High	Sequest HT	Sequest HT (A2)	A	2	Unambiguous	NDGLSVTIR	NDGLSVTIR		3	Cluster-58773.38223;orf1 len=107 frame:-2 start:576 end:256 gi; Cluster-58773.241150;orf1 len=107 frame:3 start:276 end:596 gi	699245939 ref|XP_002130337.2| PREDICTED: uncharacterized protein LOC100178034 isoform X2 [Ciona intestinalis] 405964300 gb|EKC29800.1| hypothetical protein CGI_10011215 [Crassostrea gigas]	Cluster-58773.212023;orf1 len=107 frame:2 start:284 end:604 gi; Cluster-58773.38223;orf1 len=107 frame:-2 start:576 end:256 gi; Cluster-58773.241150;orf1 len=107 frame:3 start:276 end:596 gi	699245937 ref|XP_009859587.1| PREDICTED: uncharacterized protein LOC100178034 isoform X1 [Ciona intestinalis]; 699245939 ref|XP_002130337.2| PREDICTED: uncharacterized protein LOC100178034 isoform X2 [Ciona intestinalis]; 405964300 gb|EKC29800.1| hypothetical protein CGI_10011215 [Crassostrea gigas]	0	2	2	0.2941	0	1	1	1	487.766	974.526	974.527	-0.98	-0.00048	0/0	0	0	1.16238e+06	HCD (High Energy Collision Dissociation)	MS2	3.2839	49.673	39.1697	7308	7308	7301	MCMMCM34021207.raw	F7	1518	2.55	2	0.0001881	3.06x10⁻³	0.829
High	Sequest HT	Sequest HT (A2)	A	2	Unambiguous	SDHGFQTIAGYHGSTMCPSPDDPK	SDHGFQTIAGYHGSTMcPSPDDPK	C17(Carbamidomethyl)	4	A0A6P7SER3; A0A6P7SDC4; Cluster-58773.162319;orf1 len=2921 frame:3 start:24 end:8786 gi	hemocyanin 1-like OS=Octopus vulgaris OX=6645 GN=LOC115212215 PE=4 SV=2 hemocyanin G-type, units Oda to Odg OS=Octopus vulgaris OX=6645 GN=LOC115211670 PE=4 SV=2 16596797 gb|AAK28276.2| hemocyanin G-type [Enteroctopus dofleini]	A0A6P7SER3; Cluster-58773.162316;orf1 len=2526 frame:3 start:24 end:7601 gi; A0A6P7SDC4; Cluster-58773.162319;orf1 len=2921 frame:3 start:24 end:8786 gi	hemocyanin 1-like OS=Octopus vulgaris OX=6645 GN=LOC115212215 PE=4 SV=2; 16596797 gb|AAK28276.2| hemocyanin G-type [Enteroctopus dofleini]; hemocyanin G-type, units Oda to Odg OS=Octopus vulgaris OX=6645 GN=LOC115211670 PE=4 SV=2; 16596797 gb|AAK28276.2| hemocyanin G-type [Enteroctopus dofleini]	0	2	2	0.8018	0	1	1	1	1303.06	2605.11	2605.11	1.49	0.00194	0/0	0	0	1.56978e+06	HCD (High Energy Collision Dissociation)	MS2	2.40332	19.776	39.1086	7294	7294	7290	MCMMCM34021207.raw	F7	213	4.39	3	0.0001881	1.71x10⁻⁶	2.105
High	Sequest HT	Sequest HT (A2)	A	2	Unambiguous	TGSFSAFGER	TGSFSAFGER		2	A0A6P7SI10	CD109 antigen isoform X2 OS=Octopus vulgaris OX=6645 GN=LOC115213260 PE=4 SV=1	A0A6P7SI10; A0A7E6F3R1	CD109 antigen isoform X2 OS=Octopus vulgaris OX=6645 GN=LOC115213260 PE=4 SV=1; CD109 antigen isoform X1 OS=Octopus vulgaris OX=6645 GN=LOC115213260 PE=4 SV=1	0	2	2	0.5936	0	1	1	1	529.748	1058.49	1058.49	-1.04	-0.00055	0/0	0	0	11691518	HCD (High Energy Collision Dissociation)	MS2	2.66423	5.21	39.1027	7292	7292	7290	MCMMCM34021207.raw	F7	497	2.83	1	0.0001881	1.17x10⁻³	0.992
High	Sequest HT	Sequest HT (A2)	A	2	Unambiguous	LIGCGGAYCPNSNLK	LIGcGGAYcPNSNLK	C4(Carbamidomethyl); C9(Carbamidomethyl)	2	Cluster-58773.2496;orf1 len=295 frame:2 start:2 end:886 gi	676455373 ref|XP_009053984.1| hypothetical protein LOTGIDRAFT_160631 [Lottia gigantea]>gi|556106826|gb|ESO95478.1| hypothetical protein LOTGIDRAFT_160631 [Lottia gigantea]	Cluster-58773.2496;orf1 len=295 frame:2 start:2 end:886 gi; Cluster-58773.2499;orf1 len=237 frame:2 start:2 end:712 gi	676455373 ref|XP_009053984.1| hypothetical protein LOTGIDRAFT_160631 [Lottia gigantea]>gi|556106826|gb|ESO95478.1| hypothetical protein LOTGIDRAFT_160631 [Lottia gigantea]; 667299696 ref|XP_008580716.1| PREDICTED: cysteine-rich secretory protein 3 [Galeopterus variegatus]	0	2	2	0.7022	0	1	1	1	812.385	1623.76	1623.76	0.75	0.00061	0/0	0	0	3.88674e+06	HCD (High Energy Collision Dissociation)	MS2	0.773718	17.236	39.0562	7282	7282	7279	MCMMCM34021207.raw	F7	925	3.19	1	0.0001881	4.59x10⁻⁶	1.937
High	Sequest HT	Sequest HT (A2)	A	2	Unambiguous	SDHGFQTIAGYHGSTMCPSPDDPK	SDHGFQTIAGYHGSTMcPSPDDPK	C17(Carbamidomethyl)	4	A0A6P7SER3; A0A6P7SDC4; Cluster-58773.162319;orf1 len=2921 frame:3 start:24 end:8786 gi	hemocyanin 1-like OS=Octopus vulgaris OX=6645 GN=LOC115212215 PE=4 SV=2 hemocyanin G-type, units Oda to Odg OS=Octopus vulgaris OX=6645 GN=LOC115211670 PE=4 SV=2 16596797 gb|AAK28276.2| hemocyanin G-type [Enteroctopus dofleini]	A0A6P7SER3; Cluster-58773.162316;orf1 len=2526 frame:3 start:24 end:7601 gi; A0A6P7SDC4; Cluster-58773.162319;orf1 len=2921 frame:3 start:24 end:8786 gi	hemocyanin 1-like OS=Octopus vulgaris OX=6645 GN=LOC115212215 PE=4 SV=2; 16596797 gb|AAK28276.2| hemocyanin G-type [Enteroctopus dofleini]; hemocyanin G-type, units Oda to Odg OS=Octopus vulgaris OX=6645 GN=LOC115211670 PE=4 SV=2; 16596797 gb|AAK28276.2| hemocyanin G-type [Enteroctopus dofleini]	0	3	3	0.665	0	1	1	1	869.042	2605.11	2605.11	0.89	0.00077	0/0	0	0	3.0867e+06	HCD (High Energy Collision Dissociation)	MS2	0	9.749	39.0532	7281	7281	7279	MCMMCM34021207.raw	F7	216	4.09	3	0.0001881	5.31x10⁻⁶	1.912
High	Sequest HT	Sequest HT (A2)	A	2	Unambiguous	IESHNPFNHGHISFISEDTMTKR	IESHNPFNHGHISFISEDTMTKR		4	A0A6P7SER3; A0A6P7SDC4; Cluster-58773.162319;orf1 len=2921 frame:3 start:24 end:8786 gi	hemocyanin 1-like OS=Octopus vulgaris OX=6645 GN=LOC115212215 PE=4 SV=2 hemocyanin G-type, units Oda to Odg OS=Octopus vulgaris OX=6645 GN=LOC115211670 PE=4 SV=2 16596797 gb|AAK28276.2| hemocyanin G-type [Enteroctopus dofleini]	A0A6P7SER3; Cluster-58773.162316;orf1 len=2526 frame:3 start:24 end:7601 gi; A0A6P7SDC4; Cluster-58773.162319;orf1 len=2921 frame:3 start:24 end:8786 gi	hemocyanin 1-like OS=Octopus vulgaris OX=6645 GN=LOC115212215 PE=4 SV=2; 16596797 gb|AAK28276.2| hemocyanin G-type [Enteroctopus dofleini]; hemocyanin G-type, units Oda to Odg OS=Octopus vulgaris OX=6645 GN=LOC115211670 PE=4 SV=2; 16596797 gb|AAK28276.2| hemocyanin G-type [Enteroctopus dofleini]	1	5	5	0.5281	0	1	1	1	540.262	2697.28	2697.28	-1.04	-0.00056	0/0	0	0	931698	HCD (High Energy Collision Dissociation)	MS2	8.99507	25.013	39.3076	7336	7336	7334	MCMMCM34021207.raw	F7	1024	3.92	3	0.0001881	8.72x10⁻⁵	1.435
High	Sequest HT	Sequest HT (A2)	A	2	Unambiguous	NLNSLNTGHIESLR	NLNSLNTGHIESLR		2	Cluster-58773.162319;orf1 len=2921 frame:3 start:24 end:8786 gi	16596797 gb|AAK28276.2| hemocyanin G-type [Enteroctopus dofleini]	Cluster-58773.162316;orf1 len=2526 frame:3 start:24 end:7601 gi; Cluster-58773.162319;orf1 len=2921 frame:3 start:24 end:8786 gi	16596797 gb|AAK28276.2| hemocyanin G-type [Enteroctopus dofleini]; 16596797 gb|AAK28276.2| hemocyanin G-type [Enteroctopus dofleini]	0	3	3	0.594	0	1	1	1	523.277	1567.82	1567.82	-1.16	-0.00061	0/0	0	0	358684	HCD (High Energy Collision Dissociation)	MS2	16.4366	100	38.2874	7131	7131	7125	MCMMCM34021207.raw	F7	1231	3.35	1	0.0001881	1.06x10⁻⁵	1.795
High	Sequest HT	Sequest HT (A2)	A	2	Unambiguous	LQELNSIADR	LQELNSIADR		20	A0A7E6ENX1	spectrin alpha chain isoform X2 OS=Octopus vulgaris OX=6645 GN=LOC115227715 PE=3 SV=1	A0A7E6ENX1; A0A812E653; A0A7E6ELN8; A0A7E6EMF3; A0A7E6ENM1; A0A7E6ENX8; A0A7E6ELM8; A0A7E6EMJ5; A0A812ECL6; A0A812E931; Cluster-58773.172567;orf1 len=2328 frame:1 start:1 end:6984 gi; A0A7E6EMK0; Cluster-58773.172569;orf2 len=1703 frame:2 start:1859 end:6967 gi; A0A0L8G4B4; A0A7E6ENL4; A0A7E6ELN3; A0A6P7TQ51; A0A7E6ENY3; A0A0L8G480; A0A7E6EME1	spectrin alpha chain isoform X2 OS=Octopus vulgaris OX=6645 GN=LOC115227715 PE=3 SV=1; SPTA OS=Sepia pharaonis OX=158019 GN=SPHA_68796 PE=3 SV=1; spectrin alpha chain isoform X11 OS=Octopus vulgaris OX=6645 GN=LOC115227715 PE=3 SV=1; spectrin alpha chain isoform X13 OS=Octopus vulgaris OX=6645 GN=LOC115227715 PE=3 SV=1; spectrin alpha chain isoform X10 OS=Octopus vulgaris OX=6645 GN=LOC115227715 …	0	2	2	0.4118	0	1	1	1	579.808	1158.61	1158.61	-1.8	-0.00104	0/0	0	0	235572	HCD (High Energy Collision Dissociation)	MS2	34.6156	100	38.2362	7121	7121	7114	MCMMCM34021207.raw	F7	1396	2.21	1	0.0001881	1.80x10⁻⁴	1.312
High	Sequest HT	Sequest HT (A2)	A	2	Unambiguous	GTEVCNLEIEQSK	GTEVcNLEIEQSK	C5(Carbamidomethyl)	4	A0A7E6FK29; Cluster-58773.176632;orf1 len=807 frame:1 start:1 end:2421 gi	mucin-19-like OS=Octopus vulgaris OX=6645 GN=LOC115224399 PE=4 SV=1 657741131 ref|XP_008305640.1| PREDICTED: LOW QUALITY PROTEIN: SCO-spondin [Cynoglossus semilaevis]	Cluster-58773.193634;orf1 len=180 frame:-1 start:541 end:2 gi; Cluster-58773.176634;orf1 len=801 frame:1 start:1 end:2403 gi; A0A7E6FK29; Cluster-58773.176632;orf1 len=807 frame:1 start:1 end:2421 gi	762085928 ref|XP_011425283.1| PREDICTED: mucin-5AC-like [Crassostrea gigas]; 657741131 ref|XP_008305640.1| PREDICTED: LOW QUALITY PROTEIN: SCO-spondin [Cynoglossus semilaevis]; mucin-19-like OS=Octopus vulgaris OX=6645 GN=LOC115224399 PE=4 SV=1; 657741131 ref|XP_008305640.1| PREDICTED: LOW QUALITY PROTEIN: SCO-spondin [Cynoglossus semilaevis]	0	2	2	0.5921	0	1	1	1	753.859	1506.71	1506.71	0.01	1e-05	0/0	0	0	1397428	HCD (High Energy Collision Dissociation)	MS2	4.98848	47.283	38.2161	7116	7116	7114	MCMMCM34021207.raw	F7	969	2.77	2	0.0001881	6.39x10⁻⁴	1.096
High	Sequest HT	Sequest HT (A2)	A	2	Unambiguous	ESSLVGTHSLIGK	ESSLVGTHSLIGK		5	Cluster-58773.134277;orf1 len=292 frame:2 start:92 end:967 gi	402122771 gb|AFQ32467.1| CuZn superoxide dismutase [Mytilus galloprovincialis]	Cluster-58773.134278;orf1 len=257 frame:2 start:92 end:862 gi; Cluster-58773.134274;orf1 len=281 frame:2 start:92 end:934 gi; Cluster-58773.134277;orf1 len=292 frame:2 start:92 end:967 gi; A0A6P7U0Q1; Cluster-58773.134276;orf1 len=199 frame:-3 start:699 end:103 gi	402122771 gb|AFQ32467.1| CuZn superoxide dismutase [Mytilus galloprovincialis]; 402122771 gb|AFQ32467.1| CuZn superoxide dismutase [Mytilus galloprovincialis]; 402122771 gb|AFQ32467.1| CuZn superoxide dismutase [Mytilus galloprovincialis]; superoxide dismutase [Cu-Zn] OS=Octopus vulgaris OX=6645 GN=LOC115228018 PE=4 SV=2; 402122771 gb|AFQ32467.1| CuZn superoxide dismutase [Mytilus galloprovincial…	0	3	3	0.4196	0	1	1	1	443.245	1327.72	1327.72	-0.53	-0.00023	0/0	0	0	275948	HCD (High Energy Collision Dissociation)	MS2	18.6336	100	37.1018	6890	6890	6883	MCMMCM34021207.raw	F7	1157	3.67	1	0.0001881	3.41x10⁻⁴	1.203
High	Sequest HT	Sequest HT (A2)	A	2	Unambiguous	LTAINVENTEENR	LTAINVENTEENR		11	Cluster-58773.141566;orf1 len=422 frame:2 start:2 end:1267 gi; A0A6P7TM96	405964948 gb|EKC30386.1| Fructose-bisphosphate aldolase [Crassostrea gigas] Fructose-bisphosphate aldolase OS=Octopus vulgaris OX=6645 GN=LOC115226244 PE=3 SV=1	Cluster-58773.141569;orf1 len=371 frame:1 start:1471 end:2583 gi; Cluster-58773.141566;orf1 len=422 frame:2 start:2 end:1267 gi; A0A6P7TM96; Cluster-58773.141575;orf1 len=378 frame:3 start:279 end:1412 gi; G1CW58; Cluster-58773.141574;orf1 len=371 frame:3 start:1548 end:2660 gi; A0A7E6FTI1; A0A6P7TN91; Cluster-58773.141564;orf1 len=236 frame:-3 start:709 end:2 gi; A0A0L8HKK9; Cluster-58773.141565…	405964948 gb|EKC30386.1| Fructose-bisphosphate aldolase [Crassostrea gigas]; 405964948 gb|EKC30386.1| Fructose-bisphosphate aldolase [Crassostrea gigas]; Fructose-bisphosphate aldolase OS=Octopus vulgaris OX=6645 GN=LOC115226244 PE=3 SV=1; 405964948 gb|EKC30386.1| Fructose-bisphosphate aldolase [Crassostrea gigas]; Fructose-bisphosphate aldolase (Fragment) OS=Octopus bimaculoides OX=37653 PE=2 SV…	0	2	2	0.6087	0	1	1	1	751.876	1502.74	1502.74	-0.07	-5e-05	0/0	0	0	498514	HCD (High Energy Collision Dissociation)	MS2	4.09279	100	37.088	6887	6887	6883	MCMMCM34021207.raw	F7	1294	3.68	2	0.0001881	5.58x10⁻⁷	2.296
High	Sequest HT	Sequest HT (A2)	A	2	Unambiguous	DVSSLTHADMNTLRK	DVSSLTHADMNTLRK		4	A0A6P7SER3; A0A6P7SDC4; Cluster-58773.162319;orf1 len=2921 frame:3 start:24 end:8786 gi	hemocyanin 1-like OS=Octopus vulgaris OX=6645 GN=LOC115212215 PE=4 SV=2 hemocyanin G-type, units Oda to Odg OS=Octopus vulgaris OX=6645 GN=LOC115211670 PE=4 SV=2 16596797 gb|AAK28276.2| hemocyanin G-type [Enteroctopus dofleini]	A0A6P7SER3; Cluster-58773.162316;orf1 len=2526 frame:3 start:24 end:7601 gi; A0A6P7SDC4; Cluster-58773.162319;orf1 len=2921 frame:3 start:24 end:8786 gi	hemocyanin 1-like OS=Octopus vulgaris OX=6645 GN=LOC115212215 PE=4 SV=2; 16596797 gb|AAK28276.2| hemocyanin G-type [Enteroctopus dofleini]; hemocyanin G-type, units Oda to Odg OS=Octopus vulgaris OX=6645 GN=LOC115211670 PE=4 SV=2; 16596797 gb|AAK28276.2| hemocyanin G-type [Enteroctopus dofleini]	1	3	3	0.5389	0	1	1	1	563.286	1687.84	1687.84	-0.32	-0.00018	0/0	0	0	1.35769e+06	HCD (High Energy Collision Dissociation)	MS2	3.94236	34.96	37.0764	6884	6884	6883	MCMMCM34021207.raw	F7	1368	3.21	3	0.0001881	1.26x10⁻⁵	1.766
High	Sequest HT	Sequest HT (A2)	A	2	Unambiguous	TGSQATDVRPGGEVWTPAK	TGSQATDVRPGGEVWTPAK		1	A0A7E6F1Y7	mucin-5AC-like OS=Octopus vulgaris OX=6645 GN=LOC115215420 PE=4 SV=1	A0A7E6F1Y7	mucin-5AC-like OS=Octopus vulgaris OX=6645 GN=LOC115215420 PE=4 SV=1	0	2	2	0.3732	0	1	1	1	978.994	1956.98	1956.98	2.07	0.00203	0/0	0	0	196305	HCD (High Energy Collision Dissociation)	MS2	0	100	37.0565	6882	6882	6872	MCMMCM34021207.raw	F7	1417	3.43	1	0.0001881	3.88x10⁻⁴	1.181
High	Sequest HT	Sequest HT (A2)	A	2	Unambiguous	DASDEINCISK	DASDEINcISK	C8(Carbamidomethyl)	3	Cluster-58773.172639;orf1 len=1824 frame:3 start:3 end:5474 gi	676448367 ref|XP_009051709.1| hypothetical protein LOTGIDRAFT_228404 [Lottia gigantea]>gi|556109217|gb|ESO97869.1| hypothetical protein LOTGIDRAFT_228404 [Lottia gigantea]	Cluster-58773.172641;orf1 len=1537 frame:1 start:673 end:5283 gi; A0A6P7TEV4; Cluster-58773.172639;orf1 len=1824 frame:3 start:3 end:5474 gi	762114369 ref|XP_011439962.1| PREDICTED: MAM and LDL-receptor class A domain-containing protein 2-like [Crassostrea gigas]; MAM and LDL-receptor class A domain-containing protein 2 OS=Octopus vulgaris OX=6645 GN=LOC115223376 PE=4 SV=1; 676448367 ref|XP_009051709.1| hypothetical protein LOTGIDRAFT_228404 [Lottia gigantea]>gi|556109217|gb|ESO97869.1| hypothetical protein LOTGIDRAFT_228404 [Lottia g…	0	2	2	0.696	0	1	1	1	626.28	1251.55	1251.55	-0.31	-0.0002	0/0	0	0	257307	HCD (High Energy Collision Dissociation)	MS2	35.1092	100	37.052	6881	6881	6872	MCMMCM34021207.raw	F7	490	2.73	1	0.0001881	7.94x10⁻⁵	1.452
High	Sequest HT	Sequest HT (A2)	A	2	Unambiguous	HACCLHGMATFPHWHR	HAccLHGMATFPHWHR	C3(Carbamidomethyl); C4(Carbamidomethyl)	8	A0A6P7SER3; Q9BJ58; O61363; A0A6P7SDC4; Q5XLV2; Cluster-58773.162319;orf1 len=2921 frame:3 start:24 end:8786 gi	hemocyanin 1-like OS=Octopus vulgaris OX=6645 GN=LOC115212215 PE=4 SV=2 Hemocyanin G-type (Fragment) OS=Enteroctopus dofleini OX=267067 PE=4 SV=2 Hemocyanin G-type, units Oda to Odg OS=Enteroctopus dofleini OX=267067 GN=ODHCY PE=1 SV=1 hemocyanin G-type, units Oda to Odg OS=Octopus vulgaris OX=6645 GN=LOC115211670 PE=4 SV=2 Hemocyanin A-type (Fragment) OS=Enteroctopus dofleini OX=267067 GN=HA PE=…	A0A6P7SER3; Cluster-58773.162316;orf1 len=2526 frame:3 start:24 end:7601 gi; Q9BJ58; O61363; A0A6P7SDC4; P12659; Q5XLV2; Cluster-58773.162319;orf1 len=2921 frame:3 start:24 end:8786 gi	hemocyanin 1-like OS=Octopus vulgaris OX=6645 GN=LOC115212215 PE=4 SV=2; 16596797 gb|AAK28276.2| hemocyanin G-type [Enteroctopus dofleini]; Hemocyanin G-type (Fragment) OS=Enteroctopus dofleini OX=267067 PE=4 SV=2; Hemocyanin G-type, units Oda to Odg OS=Enteroctopus dofleini OX=267067 GN=ODHCY PE=1 SV=1; hemocyanin G-type, units Oda to Odg OS=Octopus vulgaris OX=6645 GN=LOC115211670 PE=4 SV=2; He…	0	5	5	0.4392	0	1	1	1	404.386	2017.9	2017.88	9.09	0.00367	0/0	0	0	633005	HCD (High Energy Collision Dissociation)	MS2	2.56815	38.946	37.0257	6875	6875	6872	MCMMCM34021207.raw	F7	604	2.55	6	0.0001881	1.15x10⁻²	0.602
High	Sequest HT	Sequest HT (A2)	A	2	Unambiguous	SDHGFQTIAGYHGSTMCPSPDDPK	SDHGFQTIAGYHGSTmcPSPDDPK	M16(Oxidation); C17(Carbamidomethyl)	4	A0A6P7SER3; A0A6P7SDC4; Cluster-58773.162319;orf1 len=2921 frame:3 start:24 end:8786 gi	hemocyanin 1-like OS=Octopus vulgaris OX=6645 GN=LOC115212215 PE=4 SV=2 hemocyanin G-type, units Oda to Odg OS=Octopus vulgaris OX=6645 GN=LOC115211670 PE=4 SV=2 16596797 gb|AAK28276.2| hemocyanin G-type [Enteroctopus dofleini]	A0A6P7SER3; Cluster-58773.162316;orf1 len=2526 frame:3 start:24 end:7601 gi; A0A6P7SDC4; Cluster-58773.162319;orf1 len=2921 frame:3 start:24 end:8786 gi	hemocyanin 1-like OS=Octopus vulgaris OX=6645 GN=LOC115212215 PE=4 SV=2; 16596797 gb|AAK28276.2| hemocyanin G-type [Enteroctopus dofleini]; hemocyanin G-type, units Oda to Odg OS=Octopus vulgaris OX=6645 GN=LOC115211670 PE=4 SV=2; 16596797 gb|AAK28276.2| hemocyanin G-type [Enteroctopus dofleini]	0	4	4	0.6051	0	1	1	1	656.034	2621.11	2621.1	3.66	0.0024	0/0	0	0	139669	HCD (High Energy Collision Dissociation)	MS2	25.1518	100	36.996	6870	6870	6861	MCMMCM34021207.raw	F7	200	4.28	3	0.0001881	5.45x10⁻⁶	1.908
High	Sequest HT	Sequest HT (A2)	A	2	Unambiguous	DSYTIVTNGNCDR	DSYTIVTNGNcDR	C11(Carbamidomethyl)	4	Cluster-58773.180297;orf1 len=401 frame:1 start:31 end:1233 gi	676447696 ref|XP_009051492.1| hypothetical protein LOTGIDRAFT_228264 [Lottia gigantea]>gi|556108983|gb|ESO97635.1| hypothetical protein LOTGIDRAFT_228264 [Lottia gigantea]	A0A6P7T443; Cluster-58773.180297;orf1 len=401 frame:1 start:31 end:1233 gi; Cluster-58773.180292;orf1 len=217 frame:-1 start:652 end:2 gi; Cluster-58773.180293;orf1 len=349 frame:1 start:31 end:1077 gi	uncharacterized protein LOC115219132 OS=Octopus vulgaris OX=6645 GN=LOC115219132 PE=4 SV=1; 676447696 ref|XP_009051492.1| hypothetical protein LOTGIDRAFT_228264 [Lottia gigantea]>gi|556108983|gb|ESO97635.1| hypothetical protein LOTGIDRAFT_228264 [Lottia gigantea]; 676447696 ref|XP_009051492.1| hypothetical protein LOTGIDRAFT_228264 [Lottia gigantea]>gi|556108983|gb|ESO97635.1| hypothetical protei…	0	2	2	0.558	0	1	1	1	757.831	1514.65	1514.65	0.66	0.0005	0/0	0	0	247828	HCD (High Energy Collision Dissociation)	MS2	0	100	36.9914	6869	6869	6861	MCMMCM34021207.raw	F7	294	2.24	1	0.0001881	6.18x10⁻⁴	1.102
High	Sequest HT	Sequest HT (A2)	A	2	Unambiguous	ESSLVGTHSLIGK	ESSLVGTHSLIGK		5	Cluster-58773.134277;orf1 len=292 frame:2 start:92 end:967 gi	402122771 gb|AFQ32467.1| CuZn superoxide dismutase [Mytilus galloprovincialis]	Cluster-58773.134278;orf1 len=257 frame:2 start:92 end:862 gi; Cluster-58773.134274;orf1 len=281 frame:2 start:92 end:934 gi; Cluster-58773.134277;orf1 len=292 frame:2 start:92 end:967 gi; A0A6P7U0Q1; Cluster-58773.134276;orf1 len=199 frame:-3 start:699 end:103 gi	402122771 gb|AFQ32467.1| CuZn superoxide dismutase [Mytilus galloprovincialis]; 402122771 gb|AFQ32467.1| CuZn superoxide dismutase [Mytilus galloprovincialis]; 402122771 gb|AFQ32467.1| CuZn superoxide dismutase [Mytilus galloprovincialis]; superoxide dismutase [Cu-Zn] OS=Octopus vulgaris OX=6645 GN=LOC115228018 PE=4 SV=2; 402122771 gb|AFQ32467.1| CuZn superoxide dismutase [Mytilus galloprovincial…	0	2	2	0.5783	0	1	1	1	664.365	1327.72	1327.72	0.81	0.00054	0/0	0	0	1.95671e+06	HCD (High Energy Collision Dissociation)	MS2	21.4752	32.034	37.1355	6895	6895	6894	MCMMCM34021207.raw	F7	1106	3.13	1	0.0001881	5.09x10⁻⁵	1.527
High	Sequest HT	Sequest HT (A2)	A	2	Unambiguous	TGSQATDVRPGGEVWTPAK	TGSQATDVRPGGEVWTPAK		1	A0A7E6F1Y7	mucin-5AC-like OS=Octopus vulgaris OX=6645 GN=LOC115215420 PE=4 SV=1	A0A7E6F1Y7	mucin-5AC-like OS=Octopus vulgaris OX=6645 GN=LOC115215420 PE=4 SV=1	0	3	3	0.3439	0	1	1	1	652.997	1956.98	1956.98	-1.07	-0.0007	0/0	0	0	295518	HCD (High Energy Collision Dissociation)	MS2	22.8915	100	36.9317	6858	6858	6850	MCMMCM34021207.raw	F7	1380	3.14	1	0.0001881	3.35x10⁻³	0.813
High	Sequest HT	Sequest HT (A2)	A	2	Unambiguous	GGVASGFNPVKPDEYKPR	GGVASGFNPVKPDEYKPR		2	Cluster-58773.152651;orf1 len=273 frame:1 start:403 end:1221 gi	524887592 ref|XP_005100380.1| PREDICTED: gelsolin-like protein 2 [Aplysia californica]>gi|524887594|ref|XP_005100381.1| PREDICTED: gelsolin-like protein 2 [Aplysia californica]>gi|524887596|ref|XP_005100382.1| PREDICTED: gelsolin-like protein 2 [Aplysia californica]	Cluster-58773.152651;orf1 len=273 frame:1 start:403 end:1221 gi; A0A6P7S8D5	524887592 ref|XP_005100380.1| PREDICTED: gelsolin-like protein 2 [Aplysia californica]>gi|524887594|ref|XP_005100381.1| PREDICTED: gelsolin-like protein 2 [Aplysia californica]>gi|524887596|ref|XP_005100382.1| PREDICTED: gelsolin-like protein 2 [Aplysia californica]; gelsolin-like protein 2 OS=Octopus vulgaris OX=6645 GN=LOC115209888 PE=4 SV=1	0	4	4	0.5672	0	1	1	1	480.25	1917.98	1917.98	-0.95	-0.00046	0/0	0	0	324960	HCD (High Energy Collision Dissociation)	MS2	34.8776	99.311	36.9225	6856	6856	6850	MCMMCM34021207.raw	F7	1418	4.39	1	0.0001881	8.16x10⁻⁸	2.624
High	Sequest HT	Sequest HT (A2)	A	2	Unambiguous	LISESSIVK	LISESSIVK		2	A0A6P7TQA6	Parkinson disease protein 7 homolog OS=Octopus vulgaris OX=6645 GN=LOC115224773 PE=4 SV=1	A0A6P7TQA6; Cluster-58773.84191;orf1 len=303 frame:3 start:483 end:1391 gi	Parkinson disease protein 7 homolog OS=Octopus vulgaris OX=6645 GN=LOC115224773 PE=4 SV=1; 524884884 ref|XP_005099056.1| PREDICTED: protein deglycase DJ-1-like [Aplysia californica]	0	2	2	0.3789	0	1	1	1	488.289	975.571	975.572	-1.07	-0.00052	0/0	0	0	325902	HCD (High Energy Collision Dissociation)	MS2	15.9599	100	36.9179	6855	6855	6850	MCMMCM34021207.raw	F7	910	1.61	1	0.0001881	7.82x10⁻³	0.668
High	Sequest HT	Sequest HT (A2)	A	2	Unambiguous	QQWPSCQTLK	QQWPScQTLK	C6(Carbamidomethyl)	4	A0A6P7SA56	cathepsin B OS=Octopus vulgaris OX=6645 GN=LOC115210644 PE=3 SV=1	Cluster-58773.153398;orf1 len=126 frame:-2 start:378 end:1 gi; A0A6P7SA56; Cluster-58773.153413;orf1 len=355 frame:2 start:395 end:1459 gi; Cluster-58773.153412;orf1 len=248 frame:2 start:395 end:1138 gi	751657260 gb|AJF94889.1| C1 family cathepsin B17 [Tenebrio molitor]; cathepsin B OS=Octopus vulgaris OX=6645 GN=LOC115210644 PE=3 SV=1; 443692853 gb|ELT94358.1| hypothetical protein CAPTEDRAFT_221292 [Capitella teleta]; 675882824 ref|XP_009026914.1| hypothetical protein HELRODRAFT_186015 [Helobdella robusta]>gi|555691789|gb|ESN95021.1| hypothetical protein HELRODRAFT_186015 [Helobdella robusta]	0	2	2	0.6034	0	1	1	1	638.31	1275.61	1275.62	-2.24	-0.00143	0/0	0	0	298297	HCD (High Energy Collision Dissociation)	MS2	8.23095	100	36.819	6836	6836	6828	MCMMCM34021207.raw	F7	978	1.79	1	0.0001881	1.62x10⁻²	0.542
High	Sequest HT	Sequest HT (A2)	A	2	Unambiguous	AIEEYEASGIR	AIEEYEASGIR		4	Cluster-58773.181383;orf1 len=2076 frame:2 start:398 end:6625 gi	762115637 ref|XP_011440628.1| PREDICTED: uncharacterized protein LOC105337560 isoform X1 [Crassostrea gigas]	A0A7E6EZI8; Cluster-58773.181383;orf1 len=2076 frame:2 start:398 end:6625 gi; Cluster-58773.181384;orf1 len=732 frame:2 start:2 end:2197 gi; Cluster-58773.181380;orf1 len=1796 frame:2 start:1430 end:6817 gi	uncharacterized protein LOC115214248 OS=Octopus vulgaris OX=6645 GN=LOC115214248 PE=4 SV=1; 762115637 ref|XP_011440628.1| PREDICTED: uncharacterized protein LOC105337560 isoform X1 [Crassostrea gigas]; 676460412 ref|XP_009055614.1| hypothetical protein LOTGIDRAFT_153481 [Lottia gigantea]>gi|556105352|gb|ESO94004.1| hypothetical protein LOTGIDRAFT_153481 [Lottia gigantea]; 762115645 ref|XP_0114406…	0	2	2	0.6154	0	1	1	1	619.306	1237.61	1237.61	-0.22	-0.00014	0/0	0	0	323017	HCD (High Energy Collision Dissociation)	MS2	34.5266	100	36.7529	6823	6823	6817	MCMMCM34021207.raw	F7	1296	2.6	1	0.0001881	2.06x10⁻⁴	1.289
High	Sequest HT	Sequest HT (A2)	A	2	Unambiguous	KNVNSLTPTDIKDLR	KNVNSLTPTDIKDLR		1	A0A6P7SER3	hemocyanin 1-like OS=Octopus vulgaris OX=6645 GN=LOC115212215 PE=4 SV=2	A0A6P7SER3	hemocyanin 1-like OS=Octopus vulgaris OX=6645 GN=LOC115212215 PE=4 SV=2	2	2	2	0.1144	0	1	1	1	857.478	1713.95	1713.95	-0.66	-0.00056	0/0	0	0	374405	HCD (High Energy Collision Dissociation)	MS2	0	100	36.6591	6805	6805	6795	MCMMCM34021207.raw	F7	982	5.07	1	0.0001881	2.95x10⁻⁹	3.189
High	Sequest HT	Sequest HT (A2)	A	2	Unambiguous	KNVNSLTPTDIKDLR	KNVNSLTPTDIKDLR		1	A0A6P7SER3	hemocyanin 1-like OS=Octopus vulgaris OX=6645 GN=LOC115212215 PE=4 SV=2	A0A6P7SER3	hemocyanin 1-like OS=Octopus vulgaris OX=6645 GN=LOC115212215 PE=4 SV=2	2	4	4	0.3448	0	1	1	1	429.243	1713.95	1713.95	-0.53	-0.00023	0/0	0	0	2.32283e+06	HCD (High Energy Collision Dissociation)	MS2	1.14183	16.702	36.6284	6797	6797	6795	MCMMCM34021207.raw	F7	949	3.77	1	0.0001881	1.42x10⁻⁵	1.745
High	Sequest HT	Sequest HT (A2)	A	2	Unambiguous	VPSEFAHTWR	VPSEFAHTWR		6	A0A7E6FK29	mucin-19-like OS=Octopus vulgaris OX=6645 GN=LOC115224399 PE=4 SV=1	Cluster-123723.2;orf1 len=507 frame:3 start:2952 end:4472 gi; Cluster-123723.1;orf1 len=564 frame:3 start:2952 end:4643 gi; A0A0L8HYY1; Cluster-123723.3;orf2 len=488 frame:3 start:2952 end:4415 gi; A0A7E6FK29; Cluster-123723.0;orf2 len=555 frame:3 start:2952 end:4616 gi	762085926 ref|XP_011425282.1| PREDICTED: mucin-17-like [Crassostrea gigas]; 762085926 ref|XP_011425282.1| PREDICTED: mucin-17-like [Crassostrea gigas]; Uncharacterized protein OS=Octopus bimaculoides OX=37653 GN=OCBIM_22001740mg PE=4 SV=1; 762085926 ref|XP_011425282.1| PREDICTED: mucin-17-like [Crassostrea gigas]; mucin-19-like OS=Octopus vulgaris OX=6645 GN=LOC115224399 PE=4 SV=1; 762085926 ref|…	0	3	3	0.4985	0	1	1	1	410.54	1229.61	1229.61	-0.48	-0.0002	0/0	0	0	2.77658e+06	HCD (High Energy Collision Dissociation)	MS2	2.21765	16.86	36.6253	6796	6796	6795	MCMMCM34021207.raw	F7	1067	3.27	1	0.0001881	1.80x10⁻⁴	1.312
[truncated: 5,527 more rows]

## Sheet: Peptides
Confidence	PSM Ambiguity	Sequence	Modifications	Modifications (all possible sites)	Qvality PEP	Qvality q-value	SVM_Score	# Protein Groups	# Proteins	# PSMs	Master Protein Accessions	Master Protein Descriptions	Protein Accessions	# Missed Cleavages	Theo. MH+ [Da]	Sequence Length	Found in File: [F4]	Found in File: [F5]	Found in File: [F6]	Found in File: [F7]	Found in File: [F8]	Found in Sample: [S4] F4: Sample	Found in Sample: [S5] F5: Sample	Found in Sample: [S6] F6: Sample	Found in Sample: [S7] F7: Sample	Found in Sample: [S8] F8: Sample	Found in Sample Group: [S4] F4: Sample	Found in Sample Group: [S5] F5: Sample	Found in Sample Group: [S6] F6: Sample	Found in Sample Group: [S7] F7: Sample	Found in Sample Group: [S8] F8: Sample	Confidence (by Search Engine): Sequest HT	Charge (by Search Engine): Sequest HT	DeltaScore (by Search Engine): Sequest HT	DeltaCn (by Search Engine): Sequest HT	Rank (by Search Engine): Sequest HT	Search Engine Rank (by Search Engine): Sequest HT	Concatenated Rank (by Search Engine): Sequest HT	m/z [Da] (by Search Engine): Sequest HT	DeltaM [ppm] (by Search Engine): Sequest HT	Deltam/z [Da] (by Search Engine): Sequest HT	RT [min] (by Search Engine): Sequest HT	Percolator q-Value (by Search Engine): Sequest HT	Percolator PEP (by Search Engine): Sequest HT	Percolator SVMScore (by Search Engine): Sequest HT	XCorr (by Search Engine): Sequest HT
[truncated: 2,038 more rows]
