# Supplementary material for: Identifying Natural Bioactive Peptides from the Common Octopus (Octopus vulgaris Cuvier, 1797) Skin Mucus By-Products Using Proteogenomic Analysis
Source: Int J Mol Sci. 2023 Apr 12;24(8):7145. doi: 10.3390/ijms24087145 (PMC10138644; doi:10.3390/ijms24087145)
Supplement: Supplementary file 1 [file ijms-24-07145-s001.zip › Table S2. Octopus vulgaris skin mucus proteome (FDR < 1%).xlsx]

## Sheet: Octopus vulgaris skin mucus pro
N	Accesion	Description	Gene	Unique Peptides	PSMs	Coverage [%]
1	A0A6P7SER3	Hemocyanin 1-like OS=Octopus vulgaris	HA	21	1737	49		Table S2: Octopus vulgaris skin mucus proteome (FDR < 1 %)
2	A0A6P7SDC4	Hemocyanin G-type, units Oda to Odg OS=Octopus vulgaris	ODHCY	3	1659	52
3	A0A7E6FRZ6	Hemocyanin G-type OS=Enteroctopus dofleini	ODHCY	5	1660	51
4	A0A6P7SI10	CD109 antigen isoform X2 OS=Octopus vulgaris	CD109	5	354	39
5	A0A6P7TRC4	Myosin heavy chain, striated muscle OS=Argopecten irradians	MHC	53	144	27
6	Q9BJ58	Hemocyanin G-type (Fragment) OS=Enteroctopus dofleini	ODHCY	1	304	12
7	Q5XLV2	Hemocyanin A-type (Fragment) OS=Enteroctopus dofleini	HA	1	296	12
8	Cluster-58773.163438	Thioester-containing protein 1 OS= Euprymna scolopes	TEP1	1	260	37
9	A0A7E6FRZ6	Hemocyanin G-type, units Oda to Odg OS=Enteroctopus dofleini	ODHCY	1	260	12
10	A0A0L8GNM6	Uncharacterized protein OS=Octopus bimaculoides	OCBIM_22031096mg	1	249	22
11	A0A7E6FK29	Mucin-19-like OS=Octopus vulgaris	MUC19	9	60	8
12	A0A6P7T042	LOW QUALITY PROTEIN: paramyosin-like OS=Octopus vulgaris	PRM	6	76	38
13	A0A7E6FE51	Filamin-A isoform X1 OS=Octopus vulgaris	FLNA	31	63	18
14	Cluster-58773.164376	Paramyosin-like isoform X1 OS=Crassostrea gigas	PRM	2	68	44
15	Cluster-58773.163468	Thioester-containing protein 1 OS= Euprymna scolopes	TEP1	5	94	39
16	A0A6P7TDP2	70 kDa neurofilament protein isoform X1 OS=Octopus vulgaris	Nefl	6	87	38
17	I0JGT9	Actin I OS=Sepia officinalis	ACTI	3	91	48
18	A0A6P7SM13	Actin, cytoplasmic OS=Octopus vulgaris	ACTI	5	90	54
19	A0A6P7SU44	Cartilage matrix protein-like OS=Octopus vulgaris	COMP	7	23	28
20	A0A6P7SCM0	PREDICTED: periostin-like OS=Crassostrea gigas; Transforming growth factor-beta-induced protein ig-h3 OS=Crassostrea gigas	TGFBI	10	21	36
21	A0A0L8FFZ3	Tyrosinase_Cu-bd domain-containing protein (Fragment) OS=Octopus bimaculoides	DCT	1	97	36
22	A0A7E6EQD4	PREDICTED: mucin-17-like OS=Crassostrea gigas	MUC17	4	29	24
23	Cluster-58773.115194	Hypothetical protein LOTGIDRAFT_234865 OS=Lottia gigantea	LOTGIDRAFT_234865	20	41	37
24	Cluster-58773.181383	PREDICTED: uncharacterized protein LOC105337560 isoform X1 OS= Crassostrea gigas	LOC105337560	24	40	15
25	A0A7E6FLI0	Intermediate filament protein ifa-4-like OS=Octopus vulgaris	LOC118767372	4	56	40
26	A0A7E6FM90	Collagen alpha-3(VI) chain OS=Crassostrea gigas	COL6A3	13	19	37
27	A0A6P7TER7	Myosin heavy chain, non-muscle isoform X3 OS=Octopus vulgaris	MHC	13	33	12
28	Cluster-58773.194446	Uncharacterized protein LOC105329078 isoform X2 OS=Crassostrea gigas	LOC105329078	16	18	12
29	A0A7E6F2Q3	LOW QUALITY PROTEIN: SCO-spondin OS=Cynoglossus semilaevis	SSPO	1	23	25
30	A0A7E6F4M5	Cartilage matrix protein-like OS=Octopus vulgaris	LOC115216199	14	18	35
31	A0A6P7TXP9	Uncharacterized protein LOC115231284 OS=Octopus vulgaris	LOC115231284	5	15	57
32	A0A6P7TG59	70 kDa neurofilament protein OS=Octopus vulgaris	Nefl	2	59	35
33	A0A7E6FTI1	Fructose-bisphosphate aldolase OS=Crassostrea gigas	FBPA	3	27	22
34	A0A7E6FIV6	Short-chain collagen C4-like OS=Octopus vulgaris	LOC118767023	2	26	36
35	A0A6P7TVW0	Collagen alpha-4(VI) chain-like OS=Crassostrea gigas	LOC610614	2	15	22
36	A0A6P7T9Q3	Short-chain collagen C4-like isoform X1 OS=Octopus vulgaris	LOC115221572	3	26	28
37	A0A812CXG7	Uncharacterized protein OS=Sepia pharaonis	SPHA_41612	3	75	4
38	A0A7E6EVN8	Mucin-like protein OS=Octopus vulgaris	LOC115213503	16	25	15
39	Cluster-58773.129918	Hypothetical protein LOTGIDRAFT_203811 OS=Lottia gigantea	LOTGIDRAFT_154563	14	45	24
40	A0A0L8GJV0	Uncharacterized protein OS=Octopus bimaculoides	OCBIM_22032863mg	1	31	29
41	Cluster-58773.162305	Hemocyanin A-type OS=Enteroctopus dofleini	HA	1	55	59
42	A0A7E6F1Y7	Mucin-5AC-like OS=Octopus vulgaris	MUC5AC	10	39	16
43	A0A812CBN1	Uncharacterized protein OS=Sepia pharaonis	SPHA_33848	2	83	4
44	A0A6P7SJH5	Cytosolic non-specific dipeptidase OS=Octopus vulgaris	CNDP2	13	21	39
45	A0A7E6F2Q3	SCO-spondin-like OS=Octopus vulgaris	SSPOP	12	18	9
46	A0A7E6F8D1	Neuroblast differentiation-associated protein AHNAK isoform X37 OS=Octopus vulgaris	AHNAK	10	16	11
47	A0A7E6ET53	Tropomyosin Tod p 1.0102 isoform X5 OS=Octopus vulgaris	ov-tm; TM	3	34	38
48	A0A6P7TEW0	Aminopeptidase OS=Octopus vulgaris	ANPEP	10	21	13
49	A0A6P7TJS2	Insulin-like growth factor-binding protein complex acid labile subunit isoform X1 OS=Octopus vulgaris	ALS	15	30	21
50	A0A7E6FJC7	70 kDa neurofilament protein-like isoform X4 OS=Octopus vulgaris	LOC115222739	6	48	23
51	A0A6P7TYN8	Protein disulfide-isomerase OS=Octopus vulgaris	P4HB	12	25	26
52	A0A7E6FMS3	Probable chitinase 10 OS=Octopus vulgaris	Cht10	6	14	16
53	Cluster-58773.124587	Uncharacterized protein LOC101848762 OS=Aplysia californica	LOC101848762	1	40	28
54	A0A7E6ET70	Tropomyosin Tod p 1.0102 isoform X27 OS=Octopus vulgaris	LOC115210626	2	32	38
55	A0A6P7U678	Collagen alpha-4(VI) chain OS=Octopus vulgaris	COL4A4	1	40	28
56	A0A6P7T161	Uncharacterized protein LOC115218089 OS=Octopus vulgaris	LOC115218089	7	29	15
57	A0A7E6FIU9	Uncharacterized protein LOC118767013 OS=Octopus vulgaris	LOC118767013	1	23	30
58	A0A7E6FGF7	Short-chain collagen C4-like OS=Octopus vulgaris	LOC118767020	1	21	29
59	Cluster-58773.134277	CuZn superoxide dismutase OS=Mytilus galloprovincialis	SOD1	8	43	37
60	Cluster-58773.155036	Hypothetical protein LOTGIDRAFT_134745 OS=Lottia gigantea	LOTGIDRAFT_134745	12	34	31
61	A0A7E6FGW4	Short-chain collagen C4-like OS=Octopus vulgaris	LOC118767024	0	20	16
62	A0A6P7T7L0	Heat shock cognate 71 kDa protein OS=Octopus vulgaris	HSPA8	4	25	21
63	A0A6P7TBC6	Short-chain collagen C4-like isoform X1 OS=Octopus vulgaris	LOC115221579	1	18	22
64	A0A7E6EKP2	Short-chain collagen C4-like OS=Octopus vulgaris	LOC115230053	1	17	19
65	Cluster-58773.104036	Hypothetical protein LOTGIDRAFT_233460 OS=Lottia gigantea	LOTGIDRAFT_233460	12	18	21
66	A0A7E6ESM7	Tropomyosin Tod p 1.0102 isoform X14 OS=Octopus vulgaris	LOC115210626	0	29	35
67	A0A6P7T972	Uncharacterized protein LOC115221348 isoform X3 OS=Octopus vulgaris	LOC115221348	1	17	15
68	A0A6P7TM96	Fructose-bisphosphate aldolase OS=Octopus vulgaris	FBA1	1	20	25
69	A0A7E6ET67	Tropomyosin Tod p 1.0102 isoform X20 OS=Octopus vulgaris	LOC115210626	1	28	35
70	Cluster-58773.119417	Cysteine proteases inhibitor OS=Haliotis discus hannai	N/A	9	11	26
71	A0A7E6FAI7	Transforming growth factor-beta-induced protein ig-h3-like OS=Octopus vulgaris	TGFBI	1	10	35
72	Cluster-58773.174510	Hypothetical protein BRAFLDRAFT_127655 OS=Branchiostoma floridae	BRAFLDRAFT_127655	4	9	22
73	A0A7E6FGC2	Uncharacterized protein LOC115221573 OS=Octopus vulgaris	LOC115221573	1	20	14
74	A0A7E6FGA6	Short-chain collagen C4-like OS=Octopus vulgaris	LOC118767007	2	21	22
75	A0A6P7TDP0	70 kDa neurofilament protein OS=Octopus vulgaris	LOC115222952	9	17	22
76	A0A6P7SDN6	Gelsolin-like protein 2 OS=Octopus vulgaris	LOC115211664	8	28	31
77	Cluster-58773.153166	Tubulin alpha-3 chain OS=Caenorhabditis elegans	mec-12	3	13	26
78	A0A7E6F2W5	Calreticulin OS=Octopus vulgaris	CALR	9	26	29
79	A0A6P7S7B4	Uncharacterized protein LOC115209673 OS=Octopus vulgaris	LOC115209673	6	8	31
80	A0A2I7NB22	Superoxide dismutase [Cu-Zn] OS=Octopus vulgaris	SOD1	6	13	58
81	A0A6P7S7U5	A disintegrin and metalloproteinase with thrombospondin motifs 12-like OS=Octopus vulgaris	ADAMTS12	11	12	20
82	A0A6P7S8D5	Gelsolin-like protein 2 OS=Aplysia californica	gelsolin	8	18	40
83	Cluster-58773.47482	Hypothetical protein OS=Capitella teleta	CAPTEDRAFT_211623	6	9	31
84	A0A0L8HMY5	Tubulin alpha chain OS=Octopus bimaculoides	tubA	2	13	23
85	A0A0L8GJ55	Tubulin beta chain OS=Octopus bimaculoides	TUBB	7	19	25
86	Cluster-58773.135700	Serine protease 1 OS=Heterololigo bleekeri	PRSS1	4	10	33
87	Cluster-58773.180614	Radixin-like isoform X3 OS=Crassostrea gigas; PREDICTED: radixin-like isoform X4 OS=Crassostrea gigas	RDX	10	26	15
88	A0A7E6FCH8	Kielin/chordin-like protein isoform X7 OS=Octopus vulgaris	KCP	9	14	31
89	A0A6P7TZV0	Full=Hephaestin-like protein OS=Acropora millepora	HEPHL1	9	23	10
90	A0A812CBL4	HSPA1s OS=Sepia pharaonis	SPHA_33061	2	20	15
91	A0A7E6EPW2	Chitotriosidase OS=Euprymna scolopes	CHIT1	10	10	20
92	A0A6P7S9Z4	Calmodulin OS=Octopus vulgaris	CALM	4	15	39
93	A0A6P7T066	Glyceraldehyde-3-phosphate dehydrogenase OS=Octopus vulgaris	GAPDHS	7	22	27
94	A0A7E6FAI7	Transforming growth factor-beta-induced protein ig-h3-like OS=Crassostrea gigas	TGFBI	1	9	45
95	A0A6P7TVW0	Collagen alpha-4(VI) chain-like OS=Crassostrea gigas	Col6a4	6	7	11
96	Cluster-58773.111440	Uncharacterized protein LOC105330502 OS=Crassostrea gigas	LOC105330502	13	16	2
97	A0A6P7S5D2	Arginine kinase Oct f 2 OS=Octopus vulgaris	LOC115209225	3	12	23
98	Cluster-58773.176191	Uncharacterized protein isoform X2 OS=Crassostrea gigas	LOC105329078	6	6	8
99	A0A0L8HDR3	Uncharacterized protein (Fragment) OS=Octopus bimaculoides	OCBIM_22017223mg	1	48	5
100	A0A6P7T9A3	Lysosomal alpha-glucosidase-like OS=Octopus vulgaris	GAA	7	7	9
101	Cluster-58773.114694	Hypothetical protein LOTGIDRAFT_235629 OS=Lottia gigantea	LOTGIDRAFT_235629	2	9	35
102	A0A6P7S7E3	Metalloendopeptidase OS=Octopus vulgaris	LOC115209690	5	8	21
103	Cluster-58773.158799	Omega-crystallin OS=Enteroctopus dofleini	LOC115217972	1	28	30
104	A0A6P7SUK9	Adenosylhomocysteinase OS=Octopus vulgaris	Ahcy	8	14	21
105	Cluster-58773.169829	Uncharacterized protein isoform X1 OS=Crassostrea gigas ; hypothetical protein OS=Crassostrea gigas	LOC105329712; CGI_10009700	3	28	37
106	A0A7E6FKD0	Neuroglian-like isoform X4 OS=Crassostrea gigas	Nrg	10	21	16
107	Cluster-58773.118615	Hypothetical protein OS=Lottia gigantea	LOTGIDRAFT_168843	1	16	13
108	A0A7E6F5C4	Plectin OS=Octopus vulgaris	Plec	7	13	12
109	Cluster-58773.209953	Hypothetical protein OS=Lottia gigantea	LOTGIDRAFT_235309	2	9	15
110	A0A6P7TG54	Intermediate filament protein ifa-1-like isoform X1 OS=Octopus vulgaris	ifa-1	5	6	19
111	A0A6P7TIG1	Histone H1-like OS=Octopus vulgaris	His1; H1	2	13	18
112	A0A6P7T444	Transforming growth factor-beta-induced protein ig-h3-like OS=Octopus vulgaris	TGFBI	4	6	22
113	A0A6P7SZ67	Triosephosphate isomerase OS=Amphioctopus fangsiao	TPI	5	18	20
114	A0A0L8IEX1	Uncharacterized protein OS=Octopus bimaculoides	OCBIM_22014847mg	4	12	23
115	A0A7E6EPG6	Uncharacterized protein LOC115209496 OS=Octopus vulgaris	LOC115209496	6	11	7
116	A0A6P7T8U5	Uncharacterized protein LOC115221216 OS=Octopus vulgaris	LOC115221216	3	6	16
117	A0A7E6FRC1	Putative aminopeptidase W07G4.4 isoform X2 OS=Octopus vulgaris	W07G4.4	5	7	15
118	A0A6P7SVM2	Spectrin beta chain OS=Octopus vulgaris	SPTBN1	6	9	5
119	Cluster-58773.109266	Hypothetical protein LOTGIDRAFT_236719 OS=Lottia gigantea	LOTGIDRAFT_236719	4	11	25
120	A0A7E6FFM2	Short-chain collagen C4-like isoform X1 OS=Octopus vulgaris	LOC118766835	1	15	19
121	A0A0L8HGQ6	Uncharacterized protein OS=Octopus bimaculoides	OCBIM_22014960mg	1	8	20
122	A0A6P7SFW0	Fascin OS=Octopus vulgaris	Fscn1	7	14	13
123	A0A6P7S5Z3	Beta-N-acetylhexosaminidase OS=Octopus vulgaris	HEXB	1	16	13
124	A0A7E6EXY1	Na(+)/H(+) exchange regulatory cofactor NHE-RF3 isoform X2 OS=Octopus vulgaris	PDZK1	4	9	15
125	Q9NKV5	Arginine kinase OS=Sepiella maindroni	AK	1	8	15
126	A0A7E6EGR4	Short-chain collagen C4-like OS=Octopus vulgaris	LOC118760927	0	9	21
127	Cluster-58773.172639	Hypothetical protein LOTGIDRAFT_228404 OS=Lottia gigantea	LOTGIDRAFT_228404	8	10	5
128	A0A6P7SAW7	Transketolase OS=Octopus vulgaris	TKT	6	8	9
129	Cluster-58773.162300	Hemocyanin A-type OS=Enteroctopus dofleini	HA	1	18	53
130	A0A6P7T9Z5	Thymosin beta isoform X2 OS=Octopus vulgaris	LOC115221752	1	17	33
131	V6A729	MYH OS=Sepia pharaonis	SPHA_42230	1	10	4
132	A0A6P7U1Y0	Deoxynucleoside triphosphate triphosphohydrolase SAMHD1-like OS=Octopus vulgaris	SAMHD1	6	11	13
133	A0A6P7TI51	Uncharacterized protein OS=Octopus vulgaris	LOC115222714	4	6	36
134	A0A0L8GSZ5	Histone H4 OS=Octopus bimaculoides	H4C1	6	31	26
135	A0A0L8G0V9	Uncharacterized protein OS=Octopus bimaculoides	OCBIM_22003270mg	4	9	11
136	Cluster-58773.180297	Hypothetical protein OS=Lottia gigantea	LOTGIDRAFT_228264	7	8	22
137	Cluster-58773.150806	Hypothetical protein OS=Phragmatopoma lapidosa	N/A	7	16	35
138	Cluster-58773.109972	Inter-alpha-trypsin inhibitor heavy chain H3-like OS=Crassostrea gigas	ITIH3	5	19	8
139	A0A6P7SCW1	Protein-glutamine gamma-glutamyltransferase K-like OS=Octopus vulgaris	TGM1; KTG	6	14	11
140	A0A7E6F9C5	Echinoderm microtubule-associated protein-like 2 isoform X8 OS=Octopus vulgaris	EML5	4	5	7
141	Cluster-58773.43884	Hypothetical protein OS=Lottia gigantea	LOTGIDRAFT_170648	3	6	6
142	A0A6P7TDN5	Glutamine synthetase OS=Octopus vulgaris	glnA	5	17	16
143	A0A6P7SZ80	Uncharacterized protein LOC115218075 OS=Octopus vulgaris	LOC115218075	1	8	12
144	A0A6P7SLS2	Glutathione-S-transferase OS=Sepiella maindroni	GST	7	24	36
145	Cluster-58773.172049	Heme-binding protein 2-like OS=Stegastes partitus	HEBP2	7	16	17
146	A0A6P7SWF4	Calmodulin isoform X1 OS=Octopus vulgaris	LOC115217131	5	10	34
147	A0A6P7SYG8	Transcription factor iws-1 isoform X2 OS=Octopus vulgaris	iws1	5	5	24
148	A0A6P7SVS9	Plastin-1 isoform X1 OS=Octopus vulgaris	PLS1	4	7	10
149	A0A7E6EVG2	Carbonic anhydrase 1-like OS=Aplysia californica	LOC111137424	1	12	24
150	A0A6P7TGU1	Actin-interacting protein 1 isoform X1 OS=Octopus vulgaris	AIP1	5	6	9
151	A0A7E6F8D1	PREDICTED: LOW QUALITY PROTEIN: neuroblast differentiation-associated protein AHNAK-like OS=Pelodiscus sinensis	AHNAK	1	6	28
152	Cluster-58773.127031	Nucleoside diphosphate kinase B OS=Crassostrea gigas	NME2	4	16	29
153	A0A6P7SD30	Tropomyosin Tod p 1.0102 OS=Octopus vulgaris	TM	5	8	28
154	A0A6P7SU30	Myosin-2 essential light chain isoform X2 OS=Octopus vulgaris	MLC2	4	15	48
155	A0A6P7TFF7	Uncharacterized protein OS=Octopus vulgaris	LOC115223512	6	15	43
156	A0A7E6FFL7	Uncharacterized protein OS=Octopus vulgaris	LOC118766834	2	9	22
157	A0A6P7SRT8	ATP synthase subunit beta OS=Octopus vulgaris	ATP5F1B	4	9	10
158	A0A6P7TL39	Lamin-B1 isoform X2 OS=Octopus vulgaris	LMNB1	6	7	11
159	A0A6P7SHC9	14-3-3 protein epsilon OS=Octopus bimaculoides	YWHAE	1	12	27
160	Cluster-58773.156870	Omega-crystallin OS=Enteroctopus dofleini	LOC115217972	5	6	10
161	A0A6P7S7Q5	Uncharacterized protein OS=Octopus vulgaris	LOC115209763	1	9	30
162	A0A6P7T8D9	Uncharacterized protein OS=Octopus vulgaris	LOC115221193	1	4	10
163	A0A6P7TG90	Glutathione transferase OS=Octopus vulgaris	GST	7	21	29
164	A0A6P7TU72	Uncharacterized protein OS=Octopus vulgaris	LOC115229658	2	8	7
165	A0A6P7TDP8	Sushi, von Willebrand factor type A, EGF and pentraxin domain-containing protein 1 isoform X1 OS=Octopus vulgaris	Svep1	4	8	6
166	A0A6P7T067	14-3-3 family protein artA OS=Octopus vulgaris	artA	1	14	26
167	A0A6P7TFF2	Regucalcin OS=Octopus vulgaris	Rgn	4	11	22
168	A0A6P7SHI1	Malate dehydrogenase OS=Octopus vulgaris	MDH1	3	6	15
169	A0A6P7SYP7	Protein disulfide-isomerase OS=Octopus vulgaris	PDI	6	10	14
170	A0A6P7TPW3	2-phospho-D-glycerate hydro-lyase OS=Octopus vulgaris	ENO1	5	9	16
171	A0A7E6FHV2	Neural cell adhesion molecule 2 isoform X3 OS=Octopus vulgaris	NCAM2	6	9	8
172	A0A0L8GIJ6	Uncharacterized protein OS=Octopus bimaculoides	OCBIM_22032865mg	1	15	14
173	A0A6P7TRV9	Ubiquitin-activating enzyme E1 OS=Octopus vulgaris	LOC115225288	3	3	4
174	Q9TWW9	ALPHAM, alpha-macroglobulin proteinase inhibitor (Fragment) OS=Octopus vulgaris	OCTVU	1	15	70
175	A0A1B4X9A8	Chitinase OS=Octopus vulgaris	OvChi	1	5	10
176	Cluster-58773.88318	Predicted protein OS=Nematostella vectensis	v1g241253	4	11	9
177	A0A6P7UB75	Lysozyme OS=Octopus vulgaris	lysoz	2	3	27
178	A0A6P7SIX4	Inorganic diphosphatase OS=Octopus vulgaris	LOC115213471	4	8	17
179	Cluster-58773.241150	Hypothetical protein OS=Crassostrea gigas	CGI_10011215	3	6	56
180	A0A7E6FRZ6	Hemocyanin G-type, units Oda to Odg-like OS=Octopus vulgaris	ODHCY	1	17	2
181	A0A6P7TG88	Chymotrypsin B-like OS=Octopus vulgaris	LOC115222971	1	5	18
182	A0A6P7T6W7	Beta-N-acetylhexosaminidase OS=Octopus vulgaris	HEXB	5	5	7
183	A0A0L8IGZ5	Uncharacterized protein (Fragment) OS=Octopus bimaculoides	OCBIM_22036319mg	1	4	10
184	A0A7E6FAL0	Protein hu-li tai shao isoform X12 OS=Octopus vulgaris	hts	3	6	6
185	A0A0L8IG92	Uncharacterized protein OS=Octopus bimaculoides	OCBIM_22002343mg	1	5	15
186	A0A7E6ENX1	Spectrin alpha chain isoform X2 OS=Octopus vulgaris	LOC115227715	4	7	2
187	A0A6P7SNR6	1-Cys peroxiredoxin OS=Octopus vulgaris	PRDX6	6	15	27
188	Cluster-58773.166315	Mitochondrial H+ ATPase a subunit OS=Pinctada fucata	ATP6	5	9	11
189	A0A6P7T8E9	Mucin-like protein OS=Octopus vulgaris	LOC115221006	4	7	4
190	Cluster-58773.171288	Enolase-phosphatase E1-like isoform X6 OS=Crassostrea gigas	LOC109474008	4	7	6
191	A0A6P7SJN1	Carbonic anhydrase OS=Octopus vulgaris	LOC115213348	1	8	25
192	A0A6P7TMW4	Heat shock protein HSP 90-alpha isoform X2 OS=Octopus vulgaris	HSP90AA1	6	11	9
193	A0A7E6EKB6	Short-chain collagen C4-like OS=Octopus vulgaris	LOC118761725	1	6	20
194	A0A0L8HYK6	40S ribosomal protein SA OS=Octopus bimaculoides	Rpsa	4	7	18
195	Cluster-58773.205216	Hypothetical protein LOTGIDRAFT_228404 OS=Lottia gigantea	LOTGIDRAFT_228404	2	5	4
196	Cluster-58773.193547	Uncharacterized protein LOC584238 isoform X2 OS=Strongylocentrotus purpuratus	LOC584238	7	15	12
197	A0A7E6FND8	Uncharacterized protein OS=Octopus vulgaris	LOC118767817	1	8	12
198	A0A6P7TJ48	Gastrotropin OS=Octopus vulgaris	FABP6	3	8	28
199	A0A6P7SFU0	Elongation factor 2 OS=Octopus vulgaris	EEF2	5	7	6
200	A0A7E6EU42	Rho GDP-dissociation inhibitor 1 isoform X1 OS=Octopus vulgaris	ARHGDIA	3	5	21
201	Cluster-58773.162111	Laminin subunit alpha-2, partial OS=Stegodyphus mimosarum	LAMA2	1	4	14
202	A0A6P7TS78	Brorin OS=Sorex araneus	Vwc2	3	4	32
203	A0A6P7SNB3	Uncharacterized protein OS=Octopus vulgaris	LOC115214893	4	4	2
204	A0A6P7TL59	Dihydropyrimidinase isoform X6 OS=Octopus vulgaris	DPYS	5	7	10
205	A0A7E6FG45	Filamin-A isoform X3 OS=Octopus vulgaris	FLNA	5	6	7
206	A0A6P7TFQ1	Tetraspanin OS=Octopus vulgaris	CD81	4	7	10
207	Cluster-58773.159728	Methylmalonic aciduria and homocystinuria type C protein homolog OS=Saccoglossus kowalevskii	LOC111115724	4	8	20
208	A0A6P7TWK0	Uncharacterized protein OS=Octopus vulgaris	LOC115230802	3	3	21
209	Cluster-58773.3592	Hypothetical protein LOTGIDRAFT_116769, partial OS=Lottia gigantea	LOTGIDRAFT_116769	1	11	15
210	A0A6P7SCY0	Uncharacterized protein OS=Octopus vulgaris	LOC115211594	3	5	28
211	A0A6P7UAR9	Chitinase-3-like protein 1 OS=Octopus vulgaris	CHI3L1	1	4	10
212	A0A6P7SLJ4	Alpha-galactosidase OS=Octopus vulgaris	LOC115213936	5	9	16
213	A0A6P7SR15	Neurotrypsin OS=Octopus vulgaris	PRSS12	3	7	14
214	A0A6P7T7V1	Inter-alpha-trypsin inhibitor heavy chain H3 OS=Crassostrea gigas	ITIH3	1	10	4
215	A0A7E6ELC7	Slit homolog 1 protein-like isoform X1 OS=Octopus vulgaris	LOC115230610	2	5	9
216	A0A7E6FGH2	Peroxidase-like protein, partial OS=Euprymna scolopes	LOC115229954	3	3	5
217	A0A6P7SNW2	Argininosuccinate synthase OS=Octopus vulgaris	ASS1	3	5	10
218	A0A6P7SJ72	Glutamine--fructose-6-phosphate transaminase (isomerizing) OS=Octopus vulgaris	GFPT1	5	7	11
219	Cluster-58773.2496	Hypothetical protein LOTGIDRAFT_160631 OS=Lottia gigantea	LOTGIDRAFT_160631	5	9	20
220	A0A7E6EUU6	Uncharacterized protein OS=Octopus vulgaris	LOC115211110	1	11	7
221	A0A7E6EKP6	Thioredoxin-like OS=Amphimedon queenslandica	100634286	2	6	23
222	A0A7E6EJW8	Uncharacterized protein LOC115230628 isoform X2 OS=Octopus vulgaris	LOC115230628	3	5	10
223	Cluster-58773.38223	Uncharacterized protein LOC100178034 isoform X2 OS=Ciona intestinalis	LOC100178034	2	5	41
224	A0A7E6EUV4	Inter-alpha-trypsin inhibitor heavy chain H4-like OS=Octopus vulgaris	ITIH4	2	8	2
225	Cluster-58773.152550	Optic lobe calcium-binding protein OS=Doryteuthis pealeii; A33353 calcium-binding protein OS=Watasenia scintillans	CABP1	3	3	22
226	A0A6P7T446	Calcium-dependent protein kinase 12 isoform X2 OS=Octopus vulgaris	LOC115219536	4	12	28
227	A0A6P7SD80	Nucleolin isoform X3 OS=Octopus vulgaris	LOC115211796	3	4	6
228	A0A7E6EQG6	MAM and LDL-receptor class A domain-containing protein 2-like OS=Octopus vulgaris	MALRD1	1	2	4
229	A0A6P7SEE8	Transgelin-3 OS=Octopus vulgaris	TAGLN3	4	5	27
230	A0A6P7TW72	Collagen alpha-4(VI) chain-like OS=Crassostrea gigas	Col6a4	5	5	16
231	A0A6P7SRV1	Collagen alpha-4(IV) chain OS=Octopus vulgaris	Col4a4	2	2	2
232	A0A6P7SDW4	Tropomyosin Tod p 1.0102 OS=Octopus vulgaris	TM	3	7	20
233	A0A6P7SZC5	Astacin-like metalloprotease OS=Sepiella maindroni	ASTL	3	3	14
234	A0A7E6F3I7	Myosin regulatory light chain 12B isoform X1 OS=Octopus vulgaris	MYL12B	3	7	17
235	A0A6P7TPT6	Receptor-interacting serine/threonine-protein kinase 1 OS=Rattus norvegicus	Ripk3	3	4	24
236	A0A7E6ERF9	Zonadhesin-like OS=Octopus vulgaris	LOC115209190	3	3	18
237	K1R5Y8	Severin OS=Crassostrea gigas	sevA	3	6	12
238	Cluster-58773.170920	Omega-crystallin OS=Enteroctopus dofleini	LOC115217972	1	11	28
239	Cluster-58773.187542	Uncharacterized protein OS=Aplysia californica	LOC101849508	3	3	16
240	A0A6P7S512	Elongation factor 1-alpha OS=Octopus vulgaris	LOC115209172	4	7	14
241	A0A812DBA1	RP-S27Ae OS=Sepia pharaonis	RP-S27Ae	3	8	22
242	A0A6P7TXI5	Beta-hexosaminidase OS=Octopus vulgaris	HEXB	3	3	7
243	A0A7E6EQV2	Titin isoform X7 OS=Octopus vulgaris	TTN	4	5	2
244	A0A0L8GWF6	Uncharacterized protein OS=Octopus bimaculoides	OCBIM_22027193mg	1	2	23
245	A0A6P7T7W6	Aspartyl aminopeptidase OS=Octopus vulgaris	DNPEP	2	2	6
246	A0A6P7TAK2	RNA helicase OS=Octopus vulgaris	LOC115222004	2	4	6
247	A0A6P7SCB7	Gelsolin-like protein 2 OS=Octopus vulgaris	GSN	2	5	8
248	A0A6P7SGL7	Peptidyl-prolyl cis-trans isomerase OS=Octopus vulgaris	PPI	2	2	14
249	V4AXA0	Hypothetical protein OS=Lottia gigantea	LOTGIDRAFT_238761	2	7	14
250	A0A6P7TJA0	Endophilin-B1 OS=Octopus vulgaris	SH3GLB1	2	2	7
251	A0A6P7SCL7	Cylicin-1 OS=Octopus vulgaris	CYLC1	3	7	40
252	A0A7E6FHJ3	Uncharacterized protein isoform X1 OS=Octopus vulgaris	LOC115222051	3	5	3
253	A0A2L2Y4F6	Uncharacterized protein OS=Crassostrea gigas	LOC105340758	4	11	6
254	A0A6P7SDE0	Cofilin OS=Octopus vulgaris	CFL1	2	2	17
255	A0A6P7TS27	Uncharacterized protein OS=Octopus vulgaris	LOC115224899	2	3	17
256	A0A7E6FAS8	Phosphoglycerate kinase OS=Octopus vulgaris	Pgk	3	4	12
257	A0A7E6FV29	Papilin isoform X2 OS=Octopus vulgaris	PAPLN	2	3	2
258	A0A6P7TGG8	Gamma-cystathionase OS=Octopus vulgaris	CTH	2	5	8
259	A0A6P7SH66	Alpha-actinin, sarcomeric isoform X3 OS=Octopus vulgaris	LOC115212896	2	3	3
260	A0A6P7T6A1	Transforming growth factor-beta-induced protein ig-h3-like OS=Octopus vulgaris	Tgfbi	3	3	10
261	Cluster-58773.233179	Omega-crystallin OS=Enteroctopus dofleini	LOC115217972	1	2	44
262	A0A0L8H9X2	RING-type domain-containing protein OS=Octopus bimaculoides	RCHY1	2	3	6
263	A0A6P7SYX5	Hyaluronidase OS=Octopus vulgaris	Hyal1	2	2	6
264	A0A6P7T526	Probable phosphoglycerate mutase OS=Octopus vulgaris	gpmA	2	4	8
265	A0A0L8HJ80	Major vault protein OS=Octopus bimaculoides	MVP	3	4	3
266	A0A6P7TDD8	Guanine nucleotide-binding protein subunit beta-like protein OS=Octopus vulgaris	ASC1	2	2	13
267	A0A6P7SCA7	Uncharacterized protein OS=Octopus vulgaris	LOC115211140	3	3	8
268	V4AXA0	Hypothetical protein OS=Lottia gigantea	LOTGIDRAFT_238761	1	7	10
269	A0A0L8GJH5	Pyruvate kinase OS=Octopus bimaculoides	OCBIM_22032473mg	2	2	5
270	A0A6P7SH00	High mobility group protein B1 isoform X1 OS=Octopus vulgaris	LOC115212946	3	6	13
271	A0A7E6FNG2	Insulin-like growth factor-binding protein complex acid labile subunit isoform X2 OS=Octopus vulgaris	IGFALS	2	9	10
272	A0A7E6EJJ2	RING-type E3 ubiquitin transferase OS=Octopus vulgaris	LOC115230214	3	3	4
273	Q01240	60 kDa neurofilament protein OS=Doryteuthis pealeii	LOC115222970	3	4	5
274	A0A6P7SBM3	Uncharacterized protein OS=Octopus vulgaris	LOC115211015	2	6	13
275	A0A6P7TTB3	Uncharacterized protein OS=Octopus vulgaris	LOC115226287	2	3	29
276	A0A7E6EKL8	Slit homolog 1 protein-like OS=Octopus vulgaris	SLIT1	1	6	7
277	A0A6P7T4W5	Myosin regulatory light chain LC-2, mantle muscle isoform X2 OS=Octopus vulgaris	LOC115219731	3	5	19
278	A0A6P7SQ67	Uncharacterized protein OS=Octopus vulgaris	LOC115215397	3	14	12
279	R9WBT1	14-3-3 protein epsilon OS=Octopus bimaculoides	YWHAE	2	7	11
280	A0A6P7SP60	Peroxiredoxin-2 OS=Octopus vulgaris	PRDX2	2	6	11
281	A0A7E6FGH2	Peroxidase-like protein OS=Octopus vulgaris	LOC115221592	2	7	4
282	V4API0	Hypothetical protein OS=Lottia gigantea	LOTGIDRAFT_226396	2	6	36
283	A0A8B8E2U0	Calpain-9-like OS=Crassostrea gigas	LOC111130693	2	6	3
284	A0A6P7TPR7	Uncharacterized protein OS=Octopus vulgaris	LOC115224696	4	14	8
285	A0A7E6ET81	Collagen alpha-1(XII) chain-like OS=Octopus vulgaris	COL12A1	2	2	8
286	A0A6P7SQQ6	Cathepsin L1 OS=Octopus vulgaris	CTSL1	2	2	11
287	A0A6P7TMA0	Uncharacterized protein OS=Octopus vulgaris	LOC115226286	3	3	1
288	A0A2I0M918	Caspase-6, partial OS=Columba livia	CASP6	3	3	21
289	V4AFM2	Hypothetical protein OS=Lottia gigantea	LOTGIDRAFT_233221	2	3	4
290	A0A6P7SDM4	Lysosomal aspartic protease isoform X2 OS=Octopus vulgaris	ASPP	4	4	15
291	A0A6P7T3J7	Uncharacterized protein OS=Octopus vulgaris	LOC115219333	1	5	7
292	A0A6P7TGL8	Alpha-L-fucosidase OS=Octopus vulgaris	FUCA2	4	6	7
293	A0A0L8FU26	Uncharacterized protein OS=Octopus bimaculoides	OCBIM_22007935mg	2	4	4
294	A0A7E6FRL2	Uncharacterized protein isoform X1 OS=Octopus vulgaris	LOC118768220	2	4	18
295	F0V3W2	Hemocyanin (Fragment) OS=Lepidochitona cinerea	hc-fg	1	18	1
296	V3ZGI3	Hypothetical protein OS=Lottia gigantea	LOTGIDRAFT_236719	2	3	5
297	V3ZZF9	Hypothetical protein OS=Lottia gigantea	LOTGIDRAFT_231723	3	3	4
298	K1PXQ1	Inter-alpha-trypsin inhibitor heavy chain H3-like OS=Crassostrea gigas	ITIH3	3	7	11
299	A0A6P7SYQ3	Pancreatic triacylglycerol lipase-like OS=Octopus vulgaris	PNLIP	1	1	4
300	A0A6P7T8Y2	PREDICTED: Calponin-2-like isoform X2 OS=Crassostrea gigas	CNN2	2	2	6
301	A0A6P7SA56	Cathepsin B OS=Octopus vulgaris	CTSB	2	3	7
302	A0A3G5ANZ2	Uncharacterized protein OS=Aplysia californica	LOC101860584	2	5	23
303	A0A7E6FQY5	LOW QUALITY PROTEIN: deleted in malignant brain tumors 1 protein OS=Strongylocentrotus purpuratus	DMBT1	1	1	3
304	Cluster-58773.193668	Apolipophorin OS=Hyriopsis cumingii	apolpp	3	3	1
305	Cluster-58773.98586	Peptidoglycan-recognition protein-SC2 OS=Tenebrio molitor	PGRP-SC2	2	2	17
306	A0A6P7TKU5	Uncharacterized protein OS=Octopus vulgaris	LOC115223770	1	1	9
307	A0A6P7SZV4	Cytidine deaminase OS=Octopus vulgaris	CDA	1	4	13
308	Cluster-58773.77635	Transmembrane protease serine 2 OS=Mus musculus	TMPRSS2	1	3	8
309	A0A6P7SZC5	Astacin-like metalloprotease OS=Sepiella maindroni	ASTL	2	2	9
310	A0A0L8GZD4	Uncharacterized protein OS=Octopus bimaculoides	OCBIM_22025455mg	1	9	4
311	A0A6P7S417	Chloride intracellular channel exc-4 OS=Octopus vulgaris	exc4	2	4	8
312	A0A6P7SDZ2	40S ribosomal protein S14 OS=Octopus vulgaris	RPS14	2	2	16
313	Cluster-58773.137633	Poly(U)-specific endoribonuclease-A-like OS=Crassostrea gigas	ENDOU	2	3	12
314	A0A6P7TYG5	Metalloendopeptidase OS=Octopus vulgaris	ASTL	2	2	4
315	A0A6P7T4E9	Prominin-1 OS=Octopus vulgaris	PROM1	2	3	2
316	A0A6P7SUD6	6-phosphogluconolactonase OS=Octopus vulgaris	PGLS	1	2	5
317	A0A6P7S8Z7	Collagen alpha-5(VI) chain isoform X1 OS=Octopus vulgaris	COL6A5	1	2	2
318	T1FG97	Hypothetical protein OS=Helobdella robusta	HELRODRAFT_180780	2	2	15
319	A0A0L8GGC5	Uncharacterized protein OS=Octopus bimaculoides	OCBIM_22033838mg	1	1	13
320	A0A7E6F5Q5	Uncharacterized protein OS=Octopus vulgaris	LOC115216258	1	1	0
321	A0A6P7TXA6	Complement factor H-like OS=Octopus vulgaris	CFH-L	1	1	3
322	A0A6P7SYN9	Barrier-to-autointegration factor B OS=Octopus vulgaris	BANF1	1	1	13
323	A0A6P7SEJ9	TLS OS=Sepia pharaonis	TLS	2	2	4
324	A0A0L8H635	Uncharacterized protein OS=Octopus bimaculoides	OCBIM_22021483mg	2	4	11
325	A0A6P7UAL6	Adhesion G protein-coupled receptor A2-like isoform X2 OS=Octopus vulgaris	ADGRA2	2	2	5
326	A0A6P7ST76	Elongation factor 1-beta OS=Octopus vulgaris	EEF1B	1	2	6
327	A0A7E6ERY9	Titin isoform X13 OS=Octopus vulgaris	TTN	2	3	0
328	A0A6P7T046	Glyoxylate reductase/hydroxypyruvate reductase OS=Octopus vulgaris	GRHPR	1	2	6
329	A0A0L8GRG9	Uncharacterized protein OS=Octopus bimaculoides	OCBIM_22029165mg	1	4	7
330	A0A6P7T5S9	Myosin catalytic light chain LC-1, mantle muscle isoform X1 OS=Octopus vulgaris	LOC115219710	1	3	8
331	A0A6P7TAX3	Allene oxide synthase-lipoxygenase protein isoform X1 OS=Octopus vulgaris	LOC115221275	2	3	3
332	A0A6P7S478	MAM and LDL-receptor class A domain-containing protein 2-like OS=Octopus vulgaris	LOC115209054	1	2	1
333	A0A6P7TNB4	Carboxypeptidase A2-like OS=Octopus vulgaris	LOC115226674	1	1	3
334	Cluster-58773.104829	PREDICTED: calumenin-like isoform X2 OS=Aplysia californica	CALU	2	3	5
335	A0A6P7SVS2	UV excision repair protein RAD23 OS=Octopus vulgaris	RAD23	1	3	4
336	A0A7E6FPB4	Caspase-3-like isoform X5 OS=Octopus vulgaris	CASP3	1	1	4
337	Cluster-58773.158843	Ribosomal protein OS=Mytilus galloprovincialis	MGAL_10B011367	1	2	21
338	A0A6P7TVV5	Vitellogenin-like OS=Octopus vulgaris	VTG1	2	3	11
339	A0A0L8FU30	Uncharacterized protein OS=Octopus bimaculoides	OCBIM_22007941mg	1	2	7
340	A0A6P7SQN9	Actin-related protein 2/3 complex subunit 5 OS=Octopus vulgaris	ARPC5	1	2	11
341	A0A6P7TXP1	Protein flp-like OS=Octopus vulgaris	FLP	2	2	4
342	A0A6P7T8I6	UDP-N-acetylhexosamine pyrophosphorylase OS=Octopus vulgaris	UAP1	2	2	4
343	A0A6P7STB4	Alpha tubulin OS=Streblomastix strix	Atub	1	2	4
344	A0A0L8G0I6	14_3_3 domain-containing protein OS=Octopus bimaculoides	YWHAE	1	5	9
345	A0A7E6EGP6	Caspase-3-like isoform X1 OS=Octopus vulgaris	CASP3	1	4	6
346	A0A6P7TKE4	Probable aminopeptidase NPEPL1 isoform X1 OS=Octopus vulgaris	NPEPL1	2	3	5
347	A0A0L8GWK0	H15 domain-containing protein OS=Octopus bimaculoides	H1-0	1	3	8
348	A0A812E046	RP-S5e OS=Sepia pharaonis	RP-S5e	1	1	7
349	A0A6P7TH67	Chymotrypsin-1 isoform X3 OS=Octopus vulgaris	CHYM1	1	1	5
350	Cluster-58773.139753	PREDICTED: uncharacterized abhydrolase domain-containing protein-like isoform X4 OS=Crassostrea gigas	DDB_G0269086	1	1	12
351	A0A0L8GRX5	Histone H2B OS=Octopus bimaculoides	H2B	1	6	16
352	A0A6P7TDF6	Unconventional myosin-VI isoform X4 OS=Octopus vulgaris	MYO6	2	2	1
353	A0A7E6FUN7	Src substrate cortactin isoform X2 OS=Octopus vulgaris	CTTN	1	1	2
354	A0A6P7TUT0	Actin-like isoform X2 OS=Octopus vulgaris	LOC115225778	1	1	4
355	A0A6P7TGU8	Peptidyl-prolyl cis-trans isomerase OS=Octopus vulgaris	PPI	2	2	12
356	A0A6P7SL13	Troponin T, skeletal muscle isoform X3 OS=Octopus vulgaris	TNNT	1	2	3
357	A0A6P7U6Y7	Chitotriosidase-1-like OS=Octopus vulgaris	CHIT1	2	2	5
358	A0A6P7TQA6	Parkinson disease protein 7 homolog OS=Octopus vulgaris	PARK7	2	3	18
359	A0A0L8H2V2	Uncharacterized protein (Fragment) OS=Octopus bimaculoides	OCBIM_22023514mg	1	1	4
360	A0A7E6FV02	Caspase-3-like OS=Octopus vulgaris	CASP3	1	2	6
361	A0A7E6EWW0	Collagen alpha-1(I) chain isoform X1 OS=Octopus vulgaris	COL1A1	1	4	1
362	A0A6P7T1V5	Uncharacterized protein OS=Octopus vulgaris	LOC115218879	3	4	3
363	A0A6P7SM77	Uncharacterized protein OS=Octopus vulgaris	LOC115214454	1	1	0
364	A0A7E6FR49	Perilipin-4-like isoform X2 OS=Octopus vulgaris	PLIN4	1	1	5
365	A0A0L8HVK0	Uncharacterized protein (Fragment) OS=Octopus bimaculoides	OCBIM_22004871mg	1	2	3
366	A0A0L8GPM5	Ribose-phosphate diphosphokinase OS=Octopus bimaculoides	PRPS	1	1	4
367	A0A6P7TP56	E3 ubiquitin-protein ligase MIB1-like OS=Octopus vulgaris	MIB1	1	3	9
368	A0A6P7SKQ5	Tropomyosin-2 OS=Octopus vulgaris	TPM2	1	1	6
369	A0A0L8H0K9	Proteasome subunit alpha type OS=Octopus bimaculoides	psmA	1	2	4
370	A0A6P7SP92	Carbonyl reductase (NADPH) OS=Octopus vulgaris	CBR	1	1	4
371	Cluster-58773.35223	Omega-crystallin OS=Enteroctopus dofleini	LOC115217972	2	2	4
372	A0A0L8FN35	Uncharacterized protein OS=Octopus bimaculoides	OCBIM_22013525mg	2	2	15
373	A0A0L8HQM4	Uncharacterized protein OS=Octopus bimaculoides	OCBIM_22009888mg	1	1	19
374	A0A0L8FPI1	Uncharacterized protein OS=Octopus bimaculoides	OCBIM_22011905mg	1	1	4
375	A0A6P7TRP1	Uncharacterized protein LOC115224795 isoform X1 OS=Octopus vulgaris	LOC115224795	1	1	13
376	H2YI48	PREDICTED: epididymal secretory protein E1-like OS=Ciona intestinalis	NPC2	1	1	5
377	A0A6P7TLI2	Annexin OS=Octopus vulgaris	ANXA1	1	2	5
378	A0A7E6FJX7	PREDICTED: caspase-1-like OS=Callorhinchus milii	caspase-1	1	2	11
379	A0A6P7TUW4	PREDICTED: thymidine phosphorylase-like isoform X1 OS=Haplochromis burtoni	TYMP	1	1	3
380	A0A6P7U1V5	UPF0462 protein C4orf33 homolog isoform X2 OS=Octopus vulgaris	LOC115232210	1	1	7
381	A0A6P7SF58	Twinfilin-1 OS=Octopus vulgaris	Twf1	1	1	4
382	A0A6P7TUL1	Uncharacterized protein OS=Octopus vulgaris	LOC115226724	2	2	1
383	A0A7E6FP32	Uncharacterized protein LOC115224386 isoform X2 OS=Octopus vulgaris	LOC115224386	1	3	6
384	R7TPU5	Hypothetical protein OS=Capitella teleta	CAPTEDRAFT_176110	3	4	20
385	A0A0L8G0W0	Inositol-1-monophosphatase OS=Octopus bimaculoides	suhB	1	1	6
386	A0A7E6FIZ9	Intermediate filament protein A-like OS=Octopus vulgaris	LOC115222741	2	2	5
387	A0A7E6EPH3	Thioredoxin reductase 1, cytoplasmic OS=Octopus vulgaris	TXNRD1	2	2	6
388	A0A0L8FQW3	Uncharacterized protein OS=Octopus bimaculoides	OCBIM_22010545mg	1	2	4
389	A0A6P7S5H1	Mannose-6-phosphate isomerase OS=Octopus vulgaris	MPI	1	1	3
390	A0A6P7T402	Uncharacterized HIT-like protein Synpcc7942_1390 OS=Octopus vulgaris	Synpcc7942_1390	1	2	10
391	A0A0L8G2Z7	Small ubiquitin-related modifier OS=Octopus bimaculoides	SUMO	1	1	9
392	Cluster-58773.194169	Hypothetical protein HELRODRAFT_193029 OS=Helobdella robusta	20212491	1	2	17
393	A0A0L8I5N4	Adenosine deaminase OS=Octopus bimaculoides	ADAL	1	1	4
394	A0A6P7SLX9	PREDICTED: ganglioside GM2 activator-like OS=Aplysia californica	GM2A	1	3	9
395	A0A7E6FSS4	Progranulin isoform X1 OS=Octopus vulgaris	GRN	1	1	3
396	A0A6P7SWF0	Probable methylmalonate-semialdehyde dehydrogenase [acylating], mitochondrial OS=Octopus vulgaris	ALDH6A1	1	2	2
397	A0A6P7SZC5	Metalloendopeptidase OS=Octopus vulgaris	LOC115217541	1	2	3
398	A0A6P7SZ53	Aldehyde dehydrogenase (NAD(+)) OS=Octopus vulgaris	ALDH	1	1	4
399	A0A0L8HN04	Ferritin OS=Octopus bimaculoides	Fth	1	1	8
400	A0A6P7THK6	Dynein light chain OS=Octopus vulgaris	DYNLL	1	1	10
401	A0A6P7TFX5	Uncharacterized protein OS=Octopus vulgaris	LOC115223690	1	1	2
402	A0A6P7TT52	PREDICTED: E3 ubiquitin-protein ligase MIB1 isoform X1 OS=Hydra vulgaris	MIB1	2	4	8
403	A0A7E6EKV4	RBBP4 OS=Sepia pharaonis	RBBP4	1	1	4
404	A0A6P7SDX6	F-actin-capping protein subunit alpha OS=Octopus vulgaris	CAPZA	1	1	3
405	A0A6P7T4G9	Arginase OS=Octopus vulgaris	ARG	1	3	7
406	A0A7E6FFP6	Chorion peroxidase-like isoform X2 OS=Octopus vulgaris	Pxt	1	1	3
407	A0A6P7SMF2	PDZ and LIM domain protein Zasp isoform X3 OS=Octopus vulgaris	LOC115214533	1	2	3
408	A0A0L8FIY8	40S ribosomal protein S28 OS=Octopus bimaculoides	RPS28	1	1	13
409	A0A6P7SNP5	Carbonic anhydrase OS=Octopus vulgaris	CA1	1	1	3
410	A0A0L8FTP5	Uncharacterized protein (Fragment) OS=Octopus bimaculoides	OCBIM_22008391mg	1	2	4
411	A8CF64	Astacin-like squid metalloprotease type III (Fragment) OS=Sepioteuthis lessoniana	alsm-III	1	1	6
412	A0A0L8GAK9	Death domain-containing protein OS=Octopus bimaculoides	OCBIM_22037060mg	2	3	9
413	A0A6P7UA82	Histone H1-delta OS=Octopus vulgaris	H1D	1	1	7
414	A0A6P7SCX4	Beta arrestin OS=Idiosepius paradoxus	ARRB	1	2	3
415	A0A6P7STA3	Eukaryotic translation initiation factor 5B OS=Octopus vulgaris	EIF5B	1	1	2
416	A0A6P7SM63	Uncharacterized protein LOC115214315 OS=Octopus vulgaris	LOC115214315	1	2	5
417	Cluster-58773.158913	Omega-crystallin OS=Enteroctopus dofleini	LOC115217972	1	1	2
418	A0A6P7SEQ6	Isocitrate dehydrogenase [NADP] OS=Octopus vulgaris	Idh1	1	1	4
419	A0A6P7T033	T-complex protein 1 subunit gamma OS=Octopus vulgaris	CCT3	1	4	4
420	V4A396	Hypothetical protein OS=Lottia gigantea	LOTGIDRAFT_166089	1	2	14
421	A0A6P7TES8	Uncharacterized protein LOC115222385 OS=Octopus vulgaris	LOC115222385	1	5	8
422	E7CLR7	Hemocyanin (Fragment) OS=Spirula spirula	N/A	1	3	2
423	A0A6P7SQ23	Reticulocalbin-2 isoform X2 OS=Octopus vulgaris	RCN2	2	2	6
424	A0A7E6FKV2	Uncharacterized protein OS=Octopus vulgaris	LOC115223111	1	2	0
425	A0A6P7SU25	Glucose-6-phosphate isomerase OS=Octopus vulgaris	GPI	1	2	2
426	A0A6P7U683	Actin-3 OS=Octopus vulgaris	act3	1	1	3
427	A0A6P7SQA9	Neprilysin isoform X2 OS=Octopus vulgaris	MME	1	1	1
428	Cluster-58773.177090	PREDICTED: eukaryotic translation initiation factor 5A-1 OS=Stegastes partitus	EIF5A	1	1	5
429	A0A0L8GNK1	40S ribosomal protein S8 OS=Octopus bimaculoides	RPS8	1	1	6
430	A0A6P7SZ76	60S ribosomal protein L9 OS=Octopus vulgaris	RPL9	1	1	6
431	A0A6P7SGG8	Clathrin heavy chain OS=Sepia pharaonis	CLTCL1	1	3	1
432	A0A6P7TZX6	CD109 antigen OS=Octopus vulgaris	CD109	1	1	3
433	A0A6P7SIU5	Heterogeneous nuclear ribonucleoprotein A3 homolog 2 OS=Octopus vulgaris	LOC115213492	1	1	5
434	A0A6P7TL86	Actin, cytoplasmic-like OS=Octopus vulgaris	ACTB	1	1	1
435	A0A7E6FR50	NADH-cytochrome b5 reductase OS=Octopus vulgaris	CYB5RL	1	1	4
436	A0A0L8FI18	Actin-related protein 2/3 complex subunit 4 OS=Octopus bimaculoides	ARPC4	1	2	8
437	A0A7E6EY74	Twitchin OS=Octopus vulgaris	twitchin	1	2	0
438	A0A6P7THP3	Annexin OS=Sepia pharaonis	ANXA1	1	1	3
439	A0A6P7SE27	Choline transporter-like protein OS=Octopus vulgaris	SLC44A1	1	1	2
440	A0A7E6F6R4	Heterogeneous nuclear ribonucleoprotein U-like protein 1 isoform X3 OS=Octopus vulgaris	HNRNPUL1	2	2	4
441	A0A6P7SYF3	Retinal dehydrogenase 1 OS=Octopus vulgaris	ALDH1A1	1	1	2
442	A0A6P7S568	Peptidyl-prolyl cis-trans isomerase OS=Octopus vulgaris	PIN1	1	1	7
443	A0A0L8HUU8	40S ribosomal protein S27 OS=Octopus bimaculoides	RPS27	1	1	10
444	A0A6P7SLU5	NAD(P)H dehydrogenase [quinone] 1 OS=Octopus vulgaris	NQO1	1	1	3
445	A0A6P7T1V7	Calcium-dependent protein kinase 2 OS=Octopus vulgaris	CPK2	1	6	6
446	A0A0L8HPF9	Uncharacterized protein OS=Octopus bimaculoides	OCBIM_22009826mg	1	1	3
447	A0A7E6F2K4	DBH-like monooxygenase protein 1 OS=Octopus vulgaris	MOXD1	1	1	2
448	A0A6P7SE31	26S proteasome non-ATPase regulatory subunit 2 OS=Octopus vulgaris	PSMD2	1	1	2
449	A0A6P7SZG0	cAMP-regulated phosphoprotein 19 OS=Octopus vulgaris	ARPP19	1	1	13
450	A0A7E6ENU9	Tumor protein D52 isoform X12 OS=Octopus vulgaris	TPD52	1	2	4
451	A0A6P7TD64	Regucalcin-like OS=Octopus vulgaris	Rgn	1	1	4
452	A0A7E6FCP8	Metalloendopeptidase OS=Octopus vulgaris	bmp1a	1	1	1
453	A0A6P7U666	Caspase-7-like OS=Octopus vulgaris	CASP7	1	1	4
454	A0A6P7T2R7	Ornithine--oxo-acid aminotransferase OS=Octopus vulgaris	OAT	1	1	3
455	A0A7E6FSX1	Phospholipase B-like OS=Octopus vulgaris	PLBD1	1	2	2
456	A0A6P7TNL1	Golgi SNAP receptor complex member 1 OS=Octopus vulgaris	GOSR1	1	1	3
457	A0A6P7T2L4	40S ribosomal protein S3a OS=Octopus vulgaris	Rps3a	1	1	6
458	A0A6P7T0X7	Ganglioside GM2 activator OS=Octopus vulgaris	GM2A	1	1	4
459	A0A7E6FDN4	Coronin-2B isoform X1 OS=Octopus vulgaris	CORO2B	1	1	1
460	A0A6P7SH78	Universal stress protein in QAH/OAS sulfhydrylase 3'region isoform X1 OS=Octopus vulgaris	LOC115212900	1	2	8
461	A0A6P7STT4	Carboxylic ester hydrolase OS=Octopus vulgaris	Bche	1	1	2
462	A0A6P7T976	H(+)-transporting two-sector ATPase OS=Octopus vulgaris	LOC115221352	1	1	2
463	A0A6P7T174	Uncharacterized protein OS=Octopus vulgaris	LOC115218647	1	1	4
464	A0A7E6F7L4	Ribonuclease Oy isoform X2 OS=Octopus vulgaris	LOC115217081	1	1	4
465	A0A6P7SQZ9	Uncharacterized protein OS=Octopus vulgaris	LOC115215599	1	1	0
466	A0A6P7TK00	Uncharacterized protein OS=Octopus vulgaris	LOC115223143	1	1	0
467	A0A6P7SVM1	Protein-glucosylgalactosylhydroxylysine glucosidase isoform X2 OS=Octopus vulgaris	PGGHG	1	1	2
468	A0A0L8FYE6	Uncharacterized protein OS=Octopus bimaculoides	OCBIM_22004193mg	1	1	2
469	A0A7E6FNE1	Dystrophin isoform X4 OS=Octopus vulgaris	DMD	1	5	0
470	A0A7E6EKW4	Leucine-rich repeat and immunoglobulin-like domain-containing nogo receptor-interacting protein 1-B isoform X4 OS=Octopus vulgaris	lingo1b	1	1	6
471	A0A6P7S720	Poly [ADP-ribose] polymerase OS=Octopus vulgaris	PARP1	1	1	1
472	A0A0L8I519	Sulfotransfer_1 domain-containing protein OS=Octopus bimaculoides	DSEL	1	1	3
473	A0A0L8HS70	XPGN domain-containing protein OS=Octopus bimaculoides	OCBIM_22007405mg	1	1	2
474	A0A0L8GIT9	RAWUL domain-containing protein OS=Octopus bimaculoides	OCBIM_22032746mg	1	3	1
475	A0A7E6EUH0	Crystallin J1A OS=Octopus vulgaris	CRJ1A	1	1	6
476	A0A6P7S7I1	Uncharacterized protein isoform X1 OS=Octopus vulgaris	LOC115209782	1	1	1
477	V4BKD3	Hypothetical protein LOTGIDRAFT_106792 OS=Lottia gigantea	LOTGIDRAFT_106792	1	1	6
478	A0A6P7TK32	Cysteine and glycine-rich protein 1 OS=Octopus vulgaris	CSRP1	1	1	9
479	A0A6P7S641	60S ribosomal protein L4-A OS=Octopus vulgaris	RPL4A	1	1	2
480	A0A0L8GHN2	Aminotran_1_2 domain-containing protein OS=Octopus bimaculoides	SPTLC1	1	1	3
481	A0A0L8GEP4	LRRCT domain-containing protein OS=Octopus bimaculoides	RTN4R	1	1	0
482	A0A7E6ES13	MAM and LDL-receptor class A domain-containing protein 2-like OS=Octopus vulgaris	LOC115209483	1	1	1
483	Cluster-97383.0	Unnamed protein product OS=Vitrella brassicaformis	N/A	1	1	2
484	A0A6P7SPL2	Glycogenin-1 isoform X2 OS=Octopus vulgaris	GYG1	1	2	5
485	A0A6P7TJG7	Glucosidase 2 subunit beta OS=Octopus vulgaris	Prkcsh	1	1	2
486	A0A812DZ23	Hypothetical protein OS=Sepia pharaonis	SPHA_65119	1	1	10
487	A0A0L8H011	Uncharacterized protein (Fragment) OS=Octopus bimaculoides	OCBIM_22025259mg	1	1	10
488	A0A7E6EJQ8	Uncharacterized protein LOC115230492 OS=Octopus vulgaris	LOC115230492	1	1	4
489	A0A6P7T625	SH2 domain-containing adapter protein B isoform X2 OS=Octopus vulgaris	SHB	1	5	1
490	A0A6P7SSY8	F-actin-capping protein subunit beta OS=Octopus vulgaris	CAPZB	1	1	4
491	A0A6P7S6P3	Serine/arginine repetitive matrix protein 2-like OS=Octopus vulgaris	SRRM2	1	1	1
492	A0A7E6FFP7	DNAH OS=Sepia pharaonis	DNAH	1	5	1
493	A0A0L8GDA7	Uncharacterized protein OS=Octopus bimaculoides	OCBIM_22035380mg	1	1	2
494	A0A7E6F0Z8	Eukaryotic translation initiation factor 5B isoform X1 OS=Octopus vulgaris	eif5b	1	1	4
495	A0A6P7SD23	ZCCHC9 OS=Sepia pharaonis	ZCCHC9	1	1	5
496	A0A0L8GU19	60S ribosomal protein L12 OS=Octopus bimaculoides	RPL12	1	1	8
497	A0A6P7S7M6	Adenylate kinase OS=Octopus vulgaris	ADK1	1	1	9
498	A0A6P7TYC7	Ecdysteroid-regulated 16 kDa protein-like OS=Octopus vulgaris	ESR16	1	1	7
499	A0A6P7SHV4	Protein SET isoform X1 OS=Octopus vulgaris	LOC115212899	1	1	4
500	A0A6P7TY57	Monocarboxylate transporter 9-like OS=Octopus vulgaris	LOC115230701	1	1	3
501	A0A812DVF3	CTSL OS=Sepia pharaonis	CTSL	1	1	2
502	A0A6P7SKS8	PREDICTED: troponin I-like OS=Aplysia californica	TNNI1	1	1	4
503	A0A7E6FU40	Jouberin-like OS=Octopus vulgaris	AHI1	1	1	1
504	Cluster-108000.0	PREDICTED: threonine--tRNA ligase, cytoplasmic-like, partial OS=Pantholops hodgsonii	THS1	1	1	3
505	Cluster-130368.0	PREDICTED: traB domain-containing protein-like, partial OS=Pantholops hodgsonii	TRABD	1	1	3
506	A0A812DFZ2	Ether-a-go-go-related gene potassium channel 1 OS=Sepia pharaonis	SPHA_51105	1	1	1
507	A0A6P7TUK7	Uncharacterized protein OS=Octopus vulgaris	LOC115226158	1	1	7
508	A0A812B7A5	Hypothetical protein OS=Sepia pharaonis	SPHA_12771	1	1	3
509	E9IHH5	PREDICTED: uncharacterized protein LOC105395796 OS=Plutella xylostella	LOC105395796	1	1	10
510	A0A6P7SAF9	Proteasome subunit alpha type OS=Octopus vulgaris	PSMA	1	1	8
