# Supplementary material for: Identifying Natural Bioactive Peptides from the Common Octopus (Octopus vulgaris Cuvier, 1797) Skin Mucus By-Products Using Proteogenomic Analysis
Source: Int J Mol Sci. 2023 Apr 12;24(8):7145. doi: 10.3390/ijms24087145 (PMC10138644; doi:10.3390/ijms24087145)
Supplement: Supplementary file 1 [file ijms-24-07145-s001.zip › Table S3. PANTHER subgroups classifications.xlsx]

## Sheet: pantherGeneList_with Subnetwork
Table S3: PANTHER subgroups classifications
Gene ID	Mapped ID	Gene Name	Panther Family	Protein Class	Species
PANTR|Ensembl=ENSPTRG00000004846|UniProtKB=A0A2I3SCD9	Twf1	Twinfilin actin binding protein 1;TWF1;ortholog	TWINFILIN-1 (PTHR13759:SF8)	non-motor actin binding protein(PC00165)	Pan troglodytes
MACMU|Ensembl=ENSMMUG00000009242|UniProtKB=A0A1D5RKD4	P4HB	Protein disulfide-isomerase;P4HB;ortholog	PROTEIN DISULFIDE-ISOMERASE (PTHR18929:SF101)	chaperone(PC00072)	Macaca mulatta
ORNAN|Ensembl=ENSOANG00000013138|UniProtKB=F6T2M0	ALDH1A1	Aldehyde dehydrogenase 1 family member A1;ALDH1A1;ortholog	RETINAL DEHYDROGENASE 1 (PTHR11699:SF140)	dehydrogenase(PC00092)	Ornithorhynchus anatinus
ANOCA|Ensembl=ENSACAG00000005446|UniProtKB=G1KE28	TMPRSS2	Uncharacterized protein;TMPRSS2;ortholog	TRANSMEMBRANE PROTEASE SERINE 2 (PTHR24253:SF89)	serine protease(PC00203)	Anolis carolinensis
CHICK|Ensembl=ENSGALG00000008933|UniProtKB=F1NV61	CASP7	Uncharacterized protein;CASP7;ortholog	CASPASE-7 (PTHR10454:SF31)	protease(PC00190)	Gallus gallus
HUMAN|HGNC=9411|UniProtKB=P14314	Prkcsh	Glucosidase 2 subunit beta;PRKCSH;ortholog	GLUCOSIDASE 2 SUBUNIT BETA (PTHR12630:SF1)	protein-binding activity modulator(PC00095)	Homo sapiens
PSEAE|EnsemblGenome=PA4306|UniProtKB=Q9HW94	FLP	Type IVb pilin, Flp;flp;ortholog			Pseudomonas aeruginosa
HUMAN|HGNC=3300|UniProtKB=P63241	EIF5A	Eukaryotic translation initiation factor 5A-1;EIF5A;ortholog	EUKARYOTIC TRANSLATION INITIATION FACTOR 5A-1 (PTHR11673:SF34)	translation initiation factor(PC00224)	Homo sapiens
ANOCA|Ensembl=ENSACAG00000001111|UniProtKB=H9G532	GPI	Glucose-6-phosphate isomerase;GPI;ortholog	GLUCOSE-6-PHOSPHATE ISOMERASE (PTHR11469:SF1)	isomerase(PC00135)	Anolis carolinensis
MONDO|Ensembl=ENSMODG00000011145|UniProtKB=F6ULF0	ITIH3	Uncharacterized protein;ITIH3;ortholog	INTER-ALPHA-TRYPSIN INHIBITOR HEAVY CHAIN H3 (PTHR10338:SF115)	protease inhibitor(PC00191)	Monodelphis domestica
STRCO|Gene_OrderedLocusName=SCO1946|UniProtKB=Q9Z519	Pgk	Phosphoglycerate kinase;pgk;ortholog	PHOSPHOGLYCERATE KINASE 1, CHLOROPLASTIC-RELATED (PTHR11406:SF23)	carbohydrate kinase(PC00065)	Streptomyces coelicolor
CHICK|Ensembl=ENSGALG00000007220|UniProtKB=P08267	Fth	Ferritin heavy chain;FTH;ortholog	FERRITIN HEAVY CHAIN (PTHR11431:SF37)	storage protein(PC00210)	Gallus gallus
DANRE|Ensembl=ENSDARG00000015050|UniProtKB=Q6PI52	CALM	Calmodulin;calm3b;ortholog	CALMODULIN-3 (PTHR23050:SF427)	calmodulin-related(PC00061)	Danio rerio
STRR6|EnsemblGenome=spr1499|UniProtKB=P0A3Y4	gpmA	2,3-bisphosphoglycerate-dependent phosphoglycerate mutase;gpmA;ortholog	PHOSPHOGLYCERATE MUTASE (PTHR11931:SF0)	mutase(PC00160)	Streptococcus pneumoniae
CHICK|Ensembl=ENSGALG00000042890|UniProtKB=A0A1D5PZU7	PIN1	Peptidyl-prolyl cis-trans isomerase;PIN1;ortholog	PEPTIDYL-PROLYL CIS-TRANS ISOMERASE-RELATED (PTHR10657:SF4)	chaperone(PC00072)	Gallus gallus
FELCA|Ensembl=ENSFCAG00000030031|UniProtKB=M3X5A5	PGLS	6-phosphogluconolactonase;PGLS;ortholog	6-PHOSPHOGLUCONOLACTONASE (PTHR11054:SF0)	hydrolase(PC00121)	Felis catus
ORNAN|Ensembl=ENSOANG00000006970|UniProtKB=A0A6I8NDE5	Svep1	Sushi, von Willebrand factor type A, EGF and pentraxin domain containing 1;SVEP1;ortholog	SUSHI, VON WILLEBRAND FACTOR TYPE A, EGF AND PENTRAXIN DOMAIN-CONTAINING PROTEIN 1 (PTHR19325:SF43)	complement component(PC00078)	Ornithorhynchus anatinus
HORSE|Ensembl=ENSECAG00000009145|UniProtKB=A0A3Q2H867	CAPZB	F-actin-capping protein subunit beta;CAPZB;ortholog	F-ACTIN-CAPPING PROTEIN SUBUNIT BETA (PTHR10619:SF0)	non-motor actin binding protein(PC00165)	Equus caballus
MONDO|Ensembl=ENSMODG00000006076|UniProtKB=F7FES2	PARP1	Poly [ADP-ribose] polymerase;PARP1;ortholog	POLY [ADP-RIBOSE] POLYMERASE 1 (PTHR10459:SF112)	DNA metabolism protein(PC00009)	Monodelphis domestica
MACMU|Ensembl=ENSMMUG00000013020|UniProtKB=F7HP21	GSN	Actin-depolymerizing factor;GSN;ortholog	GELSOLIN (PTHR11977:SF29)	non-motor actin binding protein(PC00165)	Macaca mulatta
HUMAN|HGNC=9887|UniProtKB=Q09028	RBBP4	Histone-binding protein RBBP4;RBBP4;ortholog	HISTONE-BINDING PROTEIN RBBP4 (PTHR22850:SF90)		Homo sapiens
PIG|Ensembl=ENSSSCG00000014316|UniProtKB=F1RHA7	TGFBI	Transforming growth factor-beta-induced protein ig-h3;TGFBI;ortholog	TRANSFORMING GROWTH FACTOR-BETA-INDUCED PROTEIN IG-H3 (PTHR10900:SF82)	cell adhesion molecule(PC00069)	Sus scrofa
WHEAT|EnsemblGenome=TraesCS2B02G487300|UniProtKB=Q95H62	RPS14	30S ribosomal protein S14, chloroplastic;rps14;ortholog	28S RIBOSOMAL PROTEIN S14, MITOCHONDRIAL (PTHR19836:SF19)	ribosomal protein(PC00202)	Triticum aestivum
CANLF|Ensembl=ENSCAFG00000010423|UniProtKB=F1PM99	COL4A4	Collagen type IV alpha 4 chain;COL4A4;ortholog	COLLAGEN ALPHA-4(IV) CHAIN (PTHR24023:SF714)	extracellular matrix structural protein(PC00103)	Canis lupus familiaris
ANOCA|Ensembl=ENSACAG00000016307|UniProtKB=G1KSG4	ALDH6A1	Aldedh domain-containing protein;ALDH6A1;ortholog	METHYLMALONATE-SEMIALDEHYDE DEHYDROGENASE [ACYLATING], MITOCHONDRIAL (PTHR43866:SF3)	dehydrogenase(PC00092)	Anolis carolinensis
HUMAN|HGNC=26215|UniProtKB=Q6P4A8	PLBD1	Phospholipase B-like 1;PLBD1;ortholog	PHOSPHOLIPASE B-LIKE 1 (PTHR12370:SF1)	phospholipase(PC00186)	Homo sapiens
PSEAE|EnsemblGenome=PA0555|UniProtKB=Q9I5Y1	FBPA	Fructose-bisphosphate aldolase;fba;ortholog	D-TAGATOSE-1,6-BISPHOSPHATE ALDOLASE SUBUNIT GATY-RELATED (PTHR30304:SF0)	aldolase(PC00044)	Pseudomonas aeruginosa
MOUSE|MGI=MGI=1100881|UniProtKB=O08762	PRSS12	Neurotrypsin;Prss12;ortholog	NEUROTRYPSIN (PTHR48071:SF5)		Mus musculus
PIG|Ensembl=ENSSSCG00000028996|UniProtKB=I3LRS5	ALDH1A1	Aldehyde dehydrogenase 1 family member A1;ALDH1A1;ortholog	RETINAL DEHYDROGENASE 1 (PTHR11699:SF140)	dehydrogenase(PC00092)	Sus scrofa
FELCA|Ensembl=ENSFCAG00000008274|UniProtKB=M3W9A2	CNDP2	Carnosine dipeptidase 2;CNDP2;ortholog	CYTOSOLIC NON-SPECIFIC DIPEPTIDASE (PTHR43270:SF11)	metalloprotease(PC00153)	Felis catus
HAEIN|EnsemblGenome=HI_0111|UniProtKB=P44521	GST	Glutathione S-transferase;gst;ortholog	GLUTATHIONE S-TRANSFERASE GSTA (PTHR44051:SF10)	transferase(PC00220)	Haemophilus influenzae
MACMU|Ensembl=ENSMMUG00000005689|UniProtKB=G7NLB5	PRDX2	Peroxiredoxin-2 isoform a;PRDX2;ortholog	PEROXIREDOXIN-2 (PTHR10681:SF161)	peroxidase(PC00180)	Macaca mulatta
RAT|RGD=1310875|UniProtKB=D3ZML4	TRABD	Similar to RIKEN cDNA 5730502D15 gene (Predicted);Trabd;ortholog	TRAB DOMAIN-CONTAINING PROTEIN (PTHR21530:SF7)		Rattus norvegicus
RAT|RGD=3548|UniProtKB=Q62703	RCN2	Reticulocalbin-2;Rcn2;ortholog	RETICULOCALBIN-2 (PTHR10827:SF78)	calmodulin-related(PC00061)	Rattus norvegicus
HAEIN|EnsemblGenome=HI_0757|UniProtKB=P44865	gpmA	2,3-bisphosphoglycerate-dependent phosphoglycerate mutase;gpmA;ortholog	PHOSPHOGLYCERATE MUTASE (PTHR11931:SF0)	mutase(PC00160)	Haemophilus influenzae
HUMAN|HGNC=2213|UniProtKB=P12111	COL6A3	Collagen alpha-3(VI) chain;COL6A3;ortholog	COLLAGEN ALPHA-3(VI) CHAIN (PTHR24020:SF13)	extracellular matrix structural protein(PC00103)	Homo sapiens
MONDO|Ensembl=ENSMODG00000017476|UniProtKB=A0A5F8H327	AHI1	Uncharacterized protein;AHI1;ortholog	JOUBERIN (PTHR44499:SF1)		Monodelphis domestica
ORNAN|Ensembl=ENSOANG00000011917|UniProtKB=F6R6T3	COL6A3	Collagen type VI alpha 3 chain;COL6A3;ortholog	COLLAGEN ALPHA-3(VI) CHAIN (PTHR24020:SF13)	extracellular matrix structural protein(PC00103)	Ornithorhynchus anatinus
ANOCA|Ensembl=ENSACAG00000007815|UniProtKB=G1KH51	MIB1	RING-type E3 ubiquitin transferase;MIB1;ortholog	E3 UBIQUITIN-PROTEIN LIGASE MIB1 (PTHR24202:SF53)	ubiquitin-protein ligase(PC00234)	Anolis carolinensis
DANRE|ZFIN=ZDB-GENE-000511-2|UniProtKB=Q9I9N6	ASC1	Apoptosis-associated speck-like protein containing a CARD;pycard;ortholog	APOPTOSIS-ASSOCIATED SPECK-LIKE PROTEIN CONTAINING A CARD (PTHR46985:SF2)	defense/immunity protein(PC00090)	Danio rerio
PIG|Ensembl=ENSSSCG00000001379|UniProtKB=Q767L7	TUBB	Tubulin beta chain;TUBB;ortholog	TUBULIN BETA CHAIN (PTHR11588:SF61)	tubulin(PC00228)	Sus scrofa
LISMO|EnsemblGenome=CAD00613|UniProtKB=Q8Y4B6	ATP6	ATP synthase subunit a;atpB;ortholog	ATP SYNTHASE SUBUNIT A, CHLOROPLASTIC (PTHR42823:SF3)	ATP synthase(PC00002)	Listeria monocytogenes
ANOCA|Ensembl=ENSACAG00000013043|UniProtKB=H9GJN9	Svep1	Uncharacterized protein;SVEP1;ortholog	SUSHI, VON WILLEBRAND FACTOR TYPE A, EGF AND PENTRAXIN DOMAIN-CONTAINING PROTEIN 1 (PTHR19325:SF43)	complement component(PC00078)	Anolis carolinensis
SALTY|EnsemblGenome=STM3871|UniProtKB=Q7CPE3	ATP6	ATP synthase subunit a;atpB;ortholog	ATP SYNTHASE SUBUNIT A, CHLOROPLASTIC (PTHR42823:SF3)	ATP synthase(PC00002)	Salmonella typhimurium
CANLF|Ensembl=ENSCAFG00000008702|UniProtKB=F1PBK6	CA1	Carbonic anhydrase;CA1;ortholog	CARBONIC ANHYDRASE 1 (PTHR18952:SF266)	dehydratase(PC00091)	Canis lupus familiaris
MOUSE|MGI=MGI=3648134|UniProtKB=A6H584	COL6A5	Collagen alpha-5(VI) chain;Col6a5;ortholog	COLLAGEN ALPHA-5(VI) CHAIN (PTHR22588:SF4)		Mus musculus
MOUSE|MGI=MGI=1352745|UniProtKB=Q61553	Fscn1	Fascin;Fscn1;ortholog	FASCIN (PTHR10551:SF23)	non-motor actin binding protein(PC00165)	Mus musculus
CANLF|Ensembl=ENSCAFG00000012043|UniProtKB=A0A5F4CIU9	ADAL	Adenosine deaminase like;ADAL;ortholog	ADENOSINE DEAMINASE-LIKE PROTEIN (PTHR11409:SF42)	deaminase(PC00088)	Canis lupus familiaris
HUMAN|Gene=ENH1_HUMAN|UniProtKB=Q9N2K0	TM	HERV-H_2q24.3 provirus ancestral Env polyprotein;unassigned;ortholog	HERV-H_2Q24.1 PROVIRUS ANCESTRAL ENV POLYPROTEIN-RELATED (PTHR10424:SF60)	viral or transposable element protein(PC00237)	Homo sapiens
BOVIN|Ensembl=ENSBTAG00000018422|UniProtKB=E1BKA8	Ripk3	Receptor interacting serine/threonine kinase 3;RIPK3;ortholog	RECEPTOR-INTERACTING SERINE/THREONINE-PROTEIN KINASE 3 (PTHR23257:SF703)	non-receptor serine/threonine protein kinase(PC00167)	Bos taurus
ECOLI|EnsemblGenome=BAE77550|UniProtKB=P0AB98	ATP6	ATP synthase subunit a;atpB;ortholog	ATP SYNTHASE SUBUNIT A, CHLOROPLASTIC (PTHR42823:SF3)	ATP synthase(PC00002)	Escherichia coli
CHLTR|EnsemblGenome=CT_722|UniProtKB=O84727	gpmA	2,3-bisphosphoglycerate-dependent phosphoglycerate mutase;gpmA;ortholog	PHOSPHOGLYCERATE MUTASE (PTHR11931:SF0)	mutase(PC00160)	Chlamydia trachomatis
DICDI|dictyBase=DDB_G0286357|UniProtKB=Q54LV1	RAD23	UV excision repair protein RAD23 homolog;rcbA;ortholog	UV EXCISION REPAIR PROTEIN RAD23 (PTHR10621:SF0)	damaged DNA-binding protein(PC00086)	Dictyostelium discoideum
PSEAE|EnsemblGenome=PA3162|UniProtKB=Q9HZ71	Rpsa	30S ribosomal protein S1;rpsA;ortholog	30S RIBOSOMAL PROTEIN S1, CHLOROPLASTIC (PTHR10724:SF7)	ribosomal protein(PC00202)	Pseudomonas aeruginosa
MOUSE|MGI=MGI=1316648|UniProtKB=E9Q616	AHNAK	AHNAK nucleoprotein (desmoyokin);Ahnak;ortholog	NEUROBLAST DIFFERENTIATION-ASSOCIATED PROTEIN AHNAK (PTHR23348:SF41)		Mus musculus
HUMAN|HGNC=7414|UniProtKB=P00846	ATP6	ATP synthase subunit a;MT-ATP6;ortholog	ATP SYNTHASE SUBUNIT A (PTHR11410:SF0)	ATP synthase(PC00002)	Homo sapiens
THEKO|EnsemblGenome=TK2271|UniProtKB=Q9HHC9	TUBB	Cell division protein FtsZ 2;ftsZ2;ortholog	CELL DIVISION PROTEIN FTSZ 2 (PTHR30314:SF9)		Thermococcus kodakaraensis
MOUSE|MGI=MGI=1100886|UniProtKB=O54990	PROM1	Prominin-1;Prom1;ortholog	PROMININ-1 (PTHR22730:SF3)		Mus musculus
PLAF7|EnsemblGenome=PF3D7_0610600|UniProtKB=Q8ICR0	CPK2	Calcium-dependent protein kinase 2;CDPK2;ortholog	MAP KINASE-ACTIVATED PROTEIN KINASE 2 (PTHR24349:SF514)	non-receptor serine/threonine protein kinase(PC00167)	Plasmodium falciparum
HUMAN|HGNC=1384|UniProtKB=Q9NZU7	CABP1	Calcium-binding protein 1;CABP1;ortholog	CALCIUM-BINDING PROTEIN 1 (PTHR45917:SF1)		Homo sapiens
DANRE|ZFIN=ZDB-GENE-030131-4042|UniProtKB=F1Q8W8	CALR	Calreticulin;calr;ortholog	CALRETICULIN (PTHR11073:SF16)	chaperone(PC00072)	Danio rerio
HUMAN|HGNC=21063|UniProtKB=Q6UVY6	MOXD1	DBH-like monooxygenase protein 1;MOXD1;ortholog	DBH-LIKE MONOOXYGENASE PROTEIN 1 (PTHR10157:SF28)	hydroxylase(PC00122)	Homo sapiens
MONDO|Ensembl=ENSMODG00000000403|UniProtKB=F6QMP7	CSRP1	Cysteine and glycine rich protein 1;CSRP1;ortholog	CYSTEINE AND GLYCINE-RICH PROTEIN 1 (PTHR24215:SF23)	actin or actin-binding cytoskeletal protein(PC00041)	Monodelphis domestica
GEOSL|EnsemblGenome=GSU1612|UniProtKB=Q74CR0	gpmA	2,3-bisphosphoglycerate-dependent phosphoglycerate mutase;gpmA;ortholog	PHOSPHOGLYCERATE MUTASE (PTHR11931:SF0)	mutase(PC00160)	Geobacter sulfurreducens
CAPAN|EnsemblGenome=T459_13919|UniProtKB=K4FXE7	TPI	Triose phosphate isomerase cytosolic isoform-like protein;TPI;ortholog	TRIOSEPHOSPHATE ISOMERASE, CYTOSOLIC (PTHR21139:SF34)	isomerase(PC00135)	Capsicum annuum
PIG|Ensembl=ENSSSCG00000016574|UniProtKB=F1SMP8	KCP	Kielin cysteine rich BMP regulator;KCP;ortholog	KIELIN/CHORDIN-LIKE PROTEIN (PTHR46698:SF2)		Sus scrofa
CHICK|Ensembl=ENSGALG00000008858|UniProtKB=A0A452J7S4	MDH1	Cytosolic malate dehydrogenase;MDH1;ortholog	MALATE DEHYDROGENASE, CYTOPLASMIC (PTHR23382:SF3)	dehydrogenase(PC00092)	Gallus gallus
ORNAN|Ensembl=ENSOANG00000047552|UniProtKB=A0A6I8N957	TPD52	Uncharacterized protein;TPD52;ortholog	TUMOR PROTEIN D52 (PTHR19307:SF12)		Ornithorhynchus anatinus
BOVIN|Gene=FABP6|UniProtKB=Q3T0Z2	FABP6	Gastrotropin;FABP6;ortholog	GASTROTROPIN (PTHR11955:SF69)	transfer/carrier protein(PC00219)	Bos taurus
MOUSE|MGI=MGI=1923144|UniProtKB=Q80SY6	ADAL	Adenosine deaminase-like protein;Adal;ortholog	ADENOSINE DEAMINASE-LIKE PROTEIN (PTHR11409:SF42)	deaminase(PC00088)	Mus musculus
MONDO|Ensembl=ENSMODG00000018507|UniProtKB=A0A5F8GPB3	COL12A1	Uncharacterized protein;COL12A1;ortholog	COLLAGEN ALPHA-1(XII) CHAIN (PTHR24020:SF17)	extracellular matrix structural protein(PC00103)	Monodelphis domestica
RAT|RGD=61910|UniProtKB=P62243	RPS8	40S ribosomal protein S8;Rps8;ortholog	40S RIBOSOMAL PROTEIN S8 (PTHR10394:SF3)	ribosomal protein(PC00202)	Rattus norvegicus
GORGO|Ensembl=ENSGGOG00000002161|UniProtKB=G3QIC3	Rps3a	40S ribosomal protein S3a;RPS3A;ortholog	40S RIBOSOMAL PROTEIN S3A (PTHR11830:SF22)	ribosomal protein(PC00202)	Gorilla gorilla gorilla
BOVIN|Gene=MVP|UniProtKB=Q3SYU9	MVP	Major vault protein;MVP;ortholog	MAJOR VAULT PROTEIN (PTHR14165:SF3)	scaffold/adaptor protein(PC00226)	Bos taurus
PIG|Ensembl=ENSSSCG00000030461|UniProtKB=I3LGG0	HEPHL1	Hephaestin like 1;HEPHL1;ortholog	FERROXIDASE HEPHL1 (PTHR11709:SF233)	oxidase(PC00175)	Sus scrofa
XENTR|Ensembl=ENSXETG00000023561|UniProtKB=Q6P358	CNDP2	CNDP dipeptidase 2 (Metallopeptidase M20 family);cndp2;ortholog	CYTOSOLIC NON-SPECIFIC DIPEPTIDASE (PTHR43270:SF11)	metalloprotease(PC00153)	Xenopus tropicalis
RAT|RGD=735227|UniProtKB=Q6P7A9	GAA	Lysosomal alpha-glucosidase;Gaa;ortholog	LYSOSOMAL ALPHA-GLUCOSIDASE (PTHR22762:SF92)	glucosidase(PC00108)	Rattus norvegicus
ANOCA|Ensembl=ENSACAG00000011929|UniProtKB=G1KLU8	ANXA1	Annexin;ANXA1;ortholog	ANNEXIN A1 (PTHR10502:SF17)	calcium-binding protein(PC00060)	Anolis carolinensis
MOUSE|MGI=MGI=96074|UniProtKB=P20060	HEXB	Beta-hexosaminidase subunit beta;Hexb;ortholog	BETA-HEXOSAMINIDASE SUBUNIT BETA (PTHR22600:SF38)	glycosidase(PC00110)	Mus musculus
EMENI|EnsemblGenome=AN0554.2|UniProtKB=P08157	ALDH	Aldehyde dehydrogenase;aldA;ortholog	ALDEHYDE DEHYDROGENASE FAMILY 16 MEMBER A1 (PTHR11699:SF211)	dehydrogenase(PC00092)	Emericella nidulans
RAT|RGD=1308369|UniProtKB=D3Z898	SAMHD1	Deoxynucleoside triphosphate triphosphohydrolase SAMHD1;Samhd1;ortholog	DEOXYNUCLEOSIDE TRIPHOSPHATE TRIPHOSPHOHYDROLASE SAMHD1 (PTHR11373:SF4)	hydrolase(PC00121)	Rattus norvegicus
HORSE|Ensembl=ENSECAG00000007484|UniProtKB=F7E4C9	MALRD1	MAM and LDL receptor class A domain containing 1;MALRD1;ortholog	MAM AND LDL-RECEPTOR CLASS A DOMAIN-CONTAINING PROTEIN 1 (PTHR23282:SF140)		Equus caballus
HORSE|Ensembl=ENSECAG00000009550|UniProtKB=F7BH02	FLNA	Filamin A;FLNA;ortholog	FILAMIN-A (PTHR38537:SF5)		Equus caballus
HUMAN|HGNC=7154|UniProtKB=P08473	MME	Neprilysin;MME;ortholog	NEPRILYSIN (PTHR11733:SF114)	metalloprotease(PC00153)	Homo sapiens
RAT|RGD=68376|UniProtKB=Q63150	DPYS	Dihydropyrimidinase;Dpys;ortholog	DIHYDROPYRIMIDINASE (PTHR11647:SF50)	hydrolase(PC00121)	Rattus norvegicus
BOVIN|Ensembl=ENSBTAG00000001575|UniProtKB=P62157	CALM	Calmodulin;CALM;ortholog	CALMODULIN-3 (PTHR23050:SF427)	calmodulin-related(PC00061)	Bos taurus
CANLF|Ensembl=ENSCAFG00000008047|UniProtKB=A0A5F4DA18	Rpsa	40S ribosomal protein SA;RPSA;ortholog	40S RIBOSOMAL PROTEIN SA (PTHR11489:SF9)	ribosomal protein(PC00202)	Canis lupus familiaris
FELCA|Ensembl=ENSFCAG00000029827|UniProtKB=M3X758	NCAM2	Neural cell adhesion molecule 2;NCAM2;ortholog	MICROFIBRILLAR-ASSOCIATED PROTEIN 3-LIKE-RELATED (PTHR12231:SF231)	immunoglobulin superfamily cell adhesion molecule(PC00125)	Felis catus
ORNAN|Ensembl=ENSOANG00000006241|UniProtKB=A0A6I8PCB5	RDX	Radixin;RDX;ortholog	RADIXIN (PTHR23281:SF14)	actin or actin-binding cytoskeletal protein(PC00041)	Ornithorhynchus anatinus
ORYSJ|EnsemblGenome=Os10g0543800|UniProtKB=Q7XCK0	GST	Glutathione S-transferase;GST;ortholog	GLUTATHIONE S-TRANSFERASE (PTHR43900:SF79)	transferase(PC00220)	Oryza sativa
MACMU|Ensembl=ENSMMUG00000054990|UniProtKB=A0A5F8ARZ4	HSP90AA1	HATPase_c domain-containing protein;HSP90AA1;ortholog	HEAT SHOCK PROTEIN HSP 90-ALPHA (PTHR11528:SF87)	Hsp90 family chaperone(PC00028)	Macaca mulatta
HELAN|EnsemblGenome=HannXRQ_CPg0579911|UniProtKB=A0A172W3W1	RPS14	Putative ribosomal protein S14;rps14;ortholog	28S RIBOSOMAL PROTEIN S14, MITOCHONDRIAL (PTHR19836:SF19)	ribosomal protein(PC00202)	Helianthus annuus
RAT|RGD=70881|UniProtKB=Q5EBC0	ITIH4	Inter alpha-trypsin inhibitor, heavy chain 4;Itih4;ortholog	INTER-ALPHA-TRYPSIN INHIBITOR HEAVY CHAIN H4 (PTHR10338:SF119)	protease inhibitor(PC00191)	Rattus norvegicus
ORNAN|Ensembl=ENSOANG00000020381|UniProtKB=A0A6I8MY76	DPYS	Dihydropyrimidinase;DPYS;ortholog	DIHYDROPYRIMIDINASE (PTHR11647:SF50)	hydrolase(PC00121)	Ornithorhynchus anatinus
BOVIN|Ensembl=ENSBTAG00000008103|UniProtKB=P48644	ALDH1A1	Retinal dehydrogenase 1;ALDH1A1;ortholog	RETINAL DEHYDROGENASE 1 (PTHR11699:SF140)	dehydrogenase(PC00092)	Bos taurus
BOVIN|Ensembl=ENSBTAG00000020705|UniProtKB=E1BK01	PRSS12	Neurotrypsin;PRSS12;ortholog	NEUROTRYPSIN (PTHR48071:SF5)		Bos taurus
EMENI|EnsemblGenome=AN3469.2|UniProtKB=P23754	H2B	Histone H2B;htbA;ortholog	HISTONE H2B 1-RELATED (PTHR23428:SF70)	chromatin/chromatin-binding, or -regulatory protein(PC00077)	Emericella nidulans
ORYLA|Ensembl=ENSORLG00000001698|UniProtKB=H2L8E0	P4HB	Protein disulfide-isomerase;p4hb;ortholog	PROTEIN DISULFIDE-ISOMERASE (PTHR18929:SF101)	chaperone(PC00072)	Oryzias latipes
ORYSJ|EnsemblGenome=Os06g0231050|UniProtKB=Q67X40	CASP3	Casparian strip membrane protein 3;Os06g0231050;ortholog	CASPARIAN STRIP MEMBRANE PROTEIN 5 (PTHR11615:SF329)	dehydrogenase(PC00092)	Oryza sativa
MACMU|Ensembl=ENSMMUG00000013303|UniProtKB=A0A5F7ZL92	ALDH1A1	Aldehyde dehydrogenase 1 family member A1;ALDH1A1;ortholog	RETINAL DEHYDROGENASE 1 (PTHR11699:SF140)	dehydrogenase(PC00092)	Macaca mulatta
BOVIN|Gene=GSN|UniProtKB=Q3SX14	GSN,gelsolin	Gelsolin;GSN;ortholog	GELSOLIN (PTHR11977:SF29)	non-motor actin binding protein(PC00165)	Bos taurus
HORSE|Ensembl=ENSECAG00000016109|UniProtKB=F6TNA9	RCHY1	Ring finger and CHY zinc finger domain containing 1;RCHY1;ortholog	RING FINGER AND CHY ZINC FINGER DOMAIN-CONTAINING PROTEIN 1 (PTHR21319:SF53)	ubiquitin-protein ligase(PC00234)	Equus caballus
CAEEL|WormBase=WBGene00006584|UniProtKB=Q20334	TNNI1	Troponin I 1;tni-1;ortholog	TROPONIN I 1 (PTHR13738:SF6)	non-motor actin binding protein(PC00165)	Caenorhabditis elegans
DROME|FlyBase=FBgn0014141|UniProtKB=Q9VEN1	FLNA	Filamin-A;cher;ortholog	FILAMIN-A (PTHR38537:SF8)		Drosophila melanogaster
PANTR|Ensembl=ENSPTRG00000004180|UniProtKB=H2Q4K1	HEPHL1	Hephaestin like 1;HEPHL1;ortholog	FERROXIDASE HEPHL1 (PTHR11709:SF233)	oxidase(PC00175)	Pan troglodytes
ORNAN|Ensembl=ENSOANG00000042794|UniProtKB=A0A6I8NQI5	Ahcy	Adenosylhomocysteinase;AHCY;ortholog	ADENOSYLHOMOCYSTEINASE (PTHR23420:SF0)	hydrolase(PC00121)	Ornithorhynchus anatinus
BOVIN|Ensembl=ENSBTAG00000005664|UniProtKB=P62261	YWHAE	14-3-3 protein epsilon;YWHAE;ortholog	14-3-3 PROTEIN EPSILON (PTHR18860:SF151)	scaffold/adaptor protein(PC00226)	Bos taurus
ARATH|TAIR=locus=2163198|UniProtKB=Q9LKL2	AIP1	Two-component response regulator-like APRR1;APRR1;ortholog	TWO-COMPONENT RESPONSE REGULATOR-LIKE APRR1 (PTHR43874:SF1)	winged helix/forkhead transcription factor(PC00246)	Arabidopsis thaliana
RAT|RGD=620150|UniProtKB=Q9ESV6	GAPDHS	Glyceraldehyde-3-phosphate dehydrogenase, testis-specific;Gapdhs;ortholog	GLYCERALDEHYDE-3-PHOSPHATE DEHYDROGENASE, TESTIS-SPECIFIC (PTHR10836:SF79)	dehydrogenase(PC00092)	Rattus norvegicus
XENTR|Xenbase=XB-GENE-966955|UniProtKB=Q6DET9	EEF1B	Elongation factor 1-beta;eef1b;ortholog	ELONGATION FACTOR 1-BETA (PTHR11595:SF21)	translation elongation factor(PC00222)	Xenopus tropicalis
CANLF|Ensembl=ENSCAFG00000020239|UniProtKB=A0A5F4D6Q6	SH3GLB1	Endophilin-B1;SH3GLB1;ortholog	ENDOPHILIN-B1 (PTHR14167:SF52)	scaffold/adaptor protein(PC00226)	Canis lupus familiaris
YEAST|SGD=S000000854|UniProtKB=P10869	AK	Aspartokinase;HOM3;ortholog	ASPARTOKINASE (PTHR21499:SF59)	amino acid kinase(PC00045)	Saccharomyces cerevisiae
RAT|RGD=3107|UniProtKB=Q68FX1	MPI	Mannose-6-phosphate isomerase;Mpi;ortholog	MANNOSE-6-PHOSPHATE ISOMERASE (PTHR10309:SF0)	isomerase(PC00135)	Rattus norvegicus
CAEEL|WormBase=WBGene00007965|UniProtKB=Q18493	UAP1	Probable UDP-N-acetylglucosamine pyrophosphorylase;C36A4.4;ortholog	LD24639P (PTHR11952:SF2)		Caenorhabditis elegans
XENTR|Xenbase=XB-GENE-5883501|UniProtKB=B1H3D5	ENDOU	Poly(U)-specific endoribonuclease;endou;ortholog	POLY(U)-SPECIFIC ENDORIBONUCLEASE (PTHR12439:SF11)		Xenopus tropicalis
SPIOL|Gene=rps14|UniProtKB=P06507	RPS14	30S ribosomal protein S14, chloroplastic;rps14;ortholog	28S RIBOSOMAL PROTEIN S14, MITOCHONDRIAL (PTHR19836:SF19)	ribosomal protein(PC00202)	Spinacia oleracea
RAT|RGD=1305827|UniProtKB=Q6Q0N1	CNDP2	Cytosolic non-specific dipeptidase;Cndp2;ortholog	CYTOSOLIC NON-SPECIFIC DIPEPTIDASE (PTHR43270:SF11)	metalloprotease(PC00153)	Rattus norvegicus
PANTR|Ensembl=ENSPTRG00000023567|UniProtKB=H2R424	PDZK1	PDZ domain containing 1;PDZK1;ortholog	NA(+)/H(+) EXCHANGE REGULATORY COFACTOR NHE-RF3-RELATED (PTHR14191:SF6)	scaffold/adaptor protein(PC00226)	Pan troglodytes
CANLF|Ensembl=ENSCAFG00000012328|UniProtKB=F1PUA6	PRSS12	Neurotrypsin;PRSS12;ortholog	NEUROTRYPSIN (PTHR48071:SF5)		Canis lupus familiaris
HORSE|Ensembl=ENSECAG00000032097|UniProtKB=A0A3Q2GW77	CNN2	Calponin;CNN2;ortholog	CALPONIN-HOMOLOGY (CH) DOMAIN-CONTAINING PROTEIN (PTHR46756:SF2)	cytoskeletal protein(PC00085)	Equus caballus
ORNAN|Ensembl=ENSOANG00000031640|UniProtKB=A0A6I8NDP3	AHI1	Uncharacterized protein;AHI1;ortholog	JOUBERIN (PTHR44499:SF1)		Ornithorhynchus anatinus
CANLF|Ensembl=ENSCAFG00000023363|UniProtKB=E2R134	CNDP2	Carnosine dipeptidase 2;CNDP2;ortholog	CYTOSOLIC NON-SPECIFIC DIPEPTIDASE (PTHR43270:SF11)	metalloprotease(PC00153)	Canis lupus familiaris
GORGO|Ensembl=ENSGGOG00000011605|UniProtKB=G3R7J8	SPTBN1	Spectrin beta chain;SPTBN1;ortholog	SPECTRIN BETA CHAIN, NON-ERYTHROCYTIC 1 (PTHR11915:SF226)	actin or actin-binding cytoskeletal protein(PC00041)	Gorilla gorilla gorilla
BOVIN|Ensembl=ENSBTAG00000022007|UniProtKB=Q0VCA5	SAMHD1	Deoxynucleoside triphosphate triphosphohydrolase SAMHD1;SAMHD1;ortholog	DEOXYNUCLEOSIDE TRIPHOSPHATE TRIPHOSPHOHYDROLASE SAMHD1 (PTHR11373:SF4)	hydrolase(PC00121)	Bos taurus
THAPS|EnsemblGenome=THAPSDRAFT_26051|UniProtKB=B8CFZ9	glnA	Glutamine synthetase;GLNA;ortholog	GLUTAMINE SYNTHETASE 2 CYTOPLASMIC (PTHR20852:SF57)	ligase(PC00142)	Thalassiosira pseudonana
ORNAN|Ensembl=ENSOANG00000039121|UniProtKB=A0A6I8NIK0	Rps3a	40S ribosomal protein S3a;RPS3A;ortholog	40S RIBOSOMAL PROTEIN S3A (PTHR11830:SF0)	ribosomal protein(PC00202)	Ornithorhynchus anatinus
FELCA|Ensembl=ENSFCAG00000015723|UniProtKB=M3WN60	ITIH3	Inter-alpha-trypsin inhibitor heavy chain 3;ITIH3;ortholog	INTER-ALPHA-TRYPSIN INHIBITOR HEAVY CHAIN H3 (PTHR10338:SF115)	protease inhibitor(PC00191)	Felis catus
MACMU|Ensembl=ENSMMUG00000014049|UniProtKB=F7AG99	COL6A3	Collagen type VI alpha 3 chain;COL6A3;ortholog	COLLAGEN ALPHA-3(VI) CHAIN (PTHR24020:SF13)	extracellular matrix structural protein(PC00103)	Macaca mulatta
HUMAN|HGNC=10418|UniProtKB=P62857	RPS28	40S ribosomal protein S28;RPS28;ortholog	40S RIBOSOMAL PROTEIN S28 (PTHR10769:SF3)	ribosomal protein(PC00202)	Homo sapiens
PIG|Ensembl=ENSSSCG00000024990|UniProtKB=A0A287BNZ5	MPI	Mannose-6-phosphate isomerase;MPI;ortholog	MANNOSE-6-PHOSPHATE ISOMERASE (PTHR10309:SF0)	isomerase(PC00135)	Sus scrofa
DROME|FlyBase=FBgn0034606|UniProtKB=Q86BG1	ASPP	Ankyrin-repeat, SH3-domain, and Proline-rich-region containing protein, isoform B;ASPP;ortholog	ANKYRIN-REPEAT, SH3-DOMAIN, AND PROLINE-RICH-REGION CONTAINING PROTEIN, ISOFORM B (PTHR24131:SF10)	protein-binding activity modulator(PC00095)	Drosophila melanogaster
HORSE|Ensembl=ENSECAG00000017251|UniProtKB=F6WPB4	PARK7	Maillard deglycase;PARK7;ortholog	PARKINSON DISEASE PROTEIN 7 HOMOLOG (PTHR48094:SF12)		Equus caballus
GORGO|Ensembl=ENSGGOG00000011564|UniProtKB=A0A2I2YZJ5	ARHGDIA	Rho GDP dissociation inhibitor alpha;ARHGDIA;ortholog	RHO GDP-DISSOCIATION INHIBITOR 1 (PTHR10980:SF9)	G-protein modulator(PC00022)	Gorilla gorilla gorilla
YEAST|SGD=S000002204|UniProtKB=Q12408	NPC2	Phosphatidylglycerol/phosphatidylinositol transfer protein;NPC2;ortholog	NPC INTRACELLULAR CHOLESTEROL TRANSPORTER 2 (PTHR11306:SF0)		Saccharomyces cerevisiae
PIG|Ensembl=ENSSSCG00000011171|UniProtKB=Q28944	CTSL1	Procathepsin L;CTSL;ortholog	CATHEPSIN L2 (PTHR12411:SF57)	cysteine protease(PC00081)	Sus scrofa
HORSE|Ensembl=ENSECAG00000006687|UniProtKB=F7BLZ7	PIN1	Peptidyl-prolyl cis-trans isomerase;PIN1;ortholog	PEPTIDYL-PROLYL CIS-TRANS ISOMERASE-RELATED (PTHR10657:SF4)	chaperone(PC00072)	Equus caballus
ORNAN|Ensembl=ENSOANG00000048316|UniProtKB=A0A6I8NIX1	GM2A	GM2 ganglioside activator;GM2A;ortholog	GANGLIOSIDE GM2 ACTIVATOR (PTHR17357:SF0)	transfer/carrier protein(PC00219)	Ornithorhynchus anatinus
PANTR|Ensembl=ENSPTRG00000020496|UniProtKB=H2QWJ9	DPYS	Dihydropyrimidinase;DPYS;ortholog	DIHYDROPYRIMIDINASE (PTHR11647:SF50)	hydrolase(PC00121)	Pan troglodytes
GORGO|Ensembl=ENSGGOG00000012217|UniProtKB=G3SAE6	Plec	Plectin;PLEC;ortholog	PLECTIN (PTHR23169:SF20)	intermediate filament binding protein(PC00130)	Gorilla gorilla gorilla
HUMAN|HGNC=9477|UniProtKB=P56730	PRSS12	Neurotrypsin;PRSS12;ortholog	NEUROTRYPSIN (PTHR48071:SF5)		Homo sapiens
CLOBH|Gene_OrderedLocusName=CBO1099|UniProtKB=A5I0U1	ALDH	Aldehyde dehydrogenase;aldH;ortholog	ALDEHYDE DEHYDROGENASE TYPE III, ISOFORM Q (PTHR43570:SF16)	dehydrogenase(PC00092)	Clostridium botulinum
ANOCA|Ensembl=ENSACAG00000017476|UniProtKB=G1KTZ6	PGGHG	Glyco_hydro_65m domain-containing protein;PGGHG;ortholog	PROTEIN-GLUCOSYLGALACTOSYLHYDROXYLYSINE GLUCOSIDASE (PTHR11051:SF8)	glycosidase(PC00110)	Anolis carolinensis
GORGO|Ensembl=ENSGGOG00000012698|UniProtKB=G3RAC1	TNNI1	Troponin I1, slow skeletal type;TNNI1;ortholog	TROPONIN I, SLOW SKELETAL MUSCLE (PTHR13738:SF9)	non-motor actin binding protein(PC00165)	Gorilla gorilla gorilla
MONDO|Ensembl=ENSMODG00000006768|UniProtKB=A0A5F8GRJ8	PAPLN	Papilin, proteoglycan like sulfated glycoprotein;PAPLN;ortholog	PAPILIN (PTHR13723:SF179)	metalloprotease(PC00153)	Monodelphis domestica
ARATH|TAIR=locus=2031476|UniProtKB=Q9C9C4	ENO1	Enolase 1, chloroplastic;ENO1;ortholog	ENOLASE 1, CHLOROPLASTIC (PTHR11902:SF42)	lyase(PC00144)	Arabidopsis thaliana
ANOCA|Ensembl=ENSACAG00000005975|UniProtKB=H9GAV6	NPEPL1	CYTOSOL_AP domain-containing protein;NPEPL1;ortholog	AMINOPEPTIDASE NPEPL1-RELATED (PTHR11963:SF4)	metalloprotease(PC00153)	Anolis carolinensis
CANLF|Ensembl=ENSCAFG00000003129|UniProtKB=E2QV08	MDH1	Malate dehydrogenase;MDH1;ortholog	MALATE DEHYDROGENASE, CYTOPLASMIC (PTHR23382:SF3)	dehydrogenase(PC00092)	Canis lupus familiaris
XANCP|EnsemblGenome=XCC0822|UniProtKB=Q8PCB2	GST	Glutathione S-transferase;gst;ortholog	MALEYLACETOACETATE ISOMERASE (PTHR42673:SF4)	isomerase(PC00135)	Xanthomonas campestris
ORYLA|Ensembl=ENSORLG00000000565|UniProtKB=A0A3B3H9S7	RPL12	Ribosomal_L11 domain-containing protein;rpl12;ortholog	60S RIBOSOMAL PROTEIN L12 (PTHR11661:SF2)	ribosomal protein(PC00202)	Oryzias latipes
XENTR|Ensembl=ENSXETG00000017087|UniProtKB=F7EHF5	TNNI1	Troponin I1, slow skeletal type;tnni1;ortholog	TROPONIN I, SLOW SKELETAL MUSCLE (PTHR13738:SF9)	non-motor actin binding protein(PC00165)	Xenopus tropicalis
SOYBN|Gene=rps8|UniProtKB=Q2PMQ0	RPS8	30S ribosomal protein S8, chloroplastic;rps8;ortholog	37S RIBOSOMAL PROTEIN S8, MITOCHONDRIAL (PTHR11758:SF4)	ribosomal protein(PC00202)	Glycine max
PANTR|Ensembl=ENSPTRG00000007662|UniProtKB=A0A2I3SBS9	SRRM2	Serine/arginine repetitive matrix 2;SRRM2;ortholog	RHODANESE DOMAIN-CONTAINING PROTEIN (PTHR36562:SF5)		Pan troglodytes
CANLF|Ensembl=ENSCAFG00000000676|UniProtKB=E2RSE5	DPYS	Dihydropyrimidinase;DPYS;ortholog	DIHYDROPYRIMIDINASE (PTHR11647:SF50)	hydrolase(PC00121)	Canis lupus familiaris
RAT|RGD=621672|UniProtKB=P63116	ASC1	Asc-type amino acid transporter 1;Slc7a10;ortholog	ASC-TYPE AMINO ACID TRANSPORTER 1 (PTHR11785:SF73)	transporter(PC00227)	Rattus norvegicus
MOUSE|MGI=MGI=1277961|UniProtKB=Q9QXS1	Plec	Plectin;Plec;ortholog	PLECTIN (PTHR23169:SF20)	intermediate filament binding protein(PC00130)	Mus musculus
ANOGA|Gene=ATP6|UniProtKB=A0A343WNF1	ATP6	ATP synthase subunit a;ATP6;ortholog	ATP SYNTHASE SUBUNIT A (PTHR11410:SF0)	ATP synthase(PC00002)	Anopheles gambiae
ORNAN|Ensembl=ENSOANG00000007091|UniProtKB=A0A6I8PNB7	Twf1	Twinfilin actin binding protein 1;TWF1;ortholog	TWINFILIN-1 (PTHR13759:SF8)	non-motor actin binding protein(PC00165)	Ornithorhynchus anatinus
DANRE|ZFIN=ZDB-GENE-030826-33|UniProtKB=Q6P3L0	MVP	Major vault protein;mvp;ortholog	MAJOR VAULT PROTEIN (PTHR14165:SF3)	scaffold/adaptor protein(PC00226)	Danio rerio
HUMAN|HGNC=17149|UniProtKB=Q96IQ7	CTH	V-set and immunoglobulin domain-containing protein 2;VSIG2;ortholog	V-SET AND IMMUNOGLOBULIN DOMAIN-CONTAINING PROTEIN 2 (PTHR45046:SF1)	immunoglobulin receptor superfamily(PC00124)	Homo sapiens
MYCTU|Gene_OrderedLocusName=Rv1630|UniProtKB=P9WH43	Rpsa	30S ribosomal protein S1;rpsA;ortholog	30S RIBOSOMAL PROTEIN S1, CHLOROPLASTIC (PTHR10724:SF7)	ribosomal protein(PC00202)	Mycobacterium tuberculosis
RAT|RGD=69307|UniProtKB=O88279	SLIT1	Slit homolog 1 protein;Slit1;ortholog	SLIT HOMOLOG 1 PROTEIN (PTHR45836:SF3)		Rattus norvegicus
BOVIN|Ensembl=ENSBTAG00000011190|UniProtKB=F1N169	FLNA	Filamin A;FLNA;ortholog	FILAMIN-A (PTHR38537:SF5)		Bos taurus
GORGO|Ensembl=ENSGGOG00000002134|UniProtKB=G3QIA0	PAPLN	Papilin, proteoglycan like sulfated glycoprotein;PAPLN;ortholog	PAPILIN (PTHR13723:SF179)	metalloprotease(PC00153)	Gorilla gorilla gorilla
HUMAN|HGNC=4008|UniProtKB=Q9BTY2	FUCA2	Plasma alpha-L-fucosidase;FUCA2;ortholog	PLASMA ALPHA-L-FUCOSIDASE (PTHR10030:SF45)	glycosidase(PC00110)	Homo sapiens
MOUSE|MGI=MGI=98839|UniProtKB=Q9Z1R9	PRSS1	Protease, serine 1 (trypsin 1);Prss1;ortholog	PROTEASE, SERINE 1 (TRYPSIN 1)-RELATED (PTHR24264:SF10)	serine protease(PC00203)	Mus musculus
BACSU|EnsemblGenome=BSU_25300|UniProtKB=P19079	CDA	Cytidine deaminase;cdd;ortholog	CYTIDINE DEAMINASE (PTHR11644:SF2)	deaminase(PC00088)	Bacillus subtilis
BRADU|Gene=gst|UniProtKB=Q89SA2	GST	Glutathione S-transferase;gst;ortholog	GLUTATHIONE S-TRANSFERASE GSTA (PTHR44051:SF10)	transferase(PC00220)	Bradyrhizobium diazoefficiens
RAT|RGD=1359517|UniProtKB=Q5FVI8	ADAL	Adenosine deaminase-like;Adal;ortholog			Rattus norvegicus
MOUSE|MGI=MGI=1928271|UniProtKB=A2AJX4	MALRD1	MAM and LDL-receptor class A domain-containing protein 1;Malrd1;ortholog	MAM AND LDL-RECEPTOR CLASS A DOMAIN-CONTAINING PROTEIN 1 (PTHR23282:SF140)		Mus musculus
MACMU|Ensembl=ENSMMUG00000017067|UniProtKB=F7HLE8	ADAL	Adenosine deaminase like;ADAL;ortholog	ADENOSINE DEAMINASE-LIKE PROTEIN (PTHR11409:SF42)	deaminase(PC00088)	Macaca mulatta
CANLF|Ensembl=ENSCAFG00000031783|UniProtKB=J9NWK8	CASP6	Caspase 6;CASP6;ortholog	CASPASE-6 (PTHR10454:SF206)	protease(PC00190)	Canis lupus familiaris
RAT|RGD=69285|UniProtKB=P45592	CFL1	Cofilin-1;Cfl1;ortholog	COFILIN-1 (PTHR11913:SF17)	non-motor actin binding protein(PC00165)	Rattus norvegicus
MACMU|Ensembl=ENSMMUG00000000388|UniProtKB=F7ABN9	Plec	Plectin;PLEC;ortholog	PLECTIN (PTHR23169:SF20)	intermediate filament binding protein(PC00130)	Macaca mulatta
XENTR|Ensembl=ENSXETG00000020609|UniProtKB=A0A6I8RPX9	PGGHG	Protein-glucosylgalactosylhydroxylysine glucosidase;pgghg;ortholog	PROTEIN-GLUCOSYLGALACTOSYLHYDROXYLYSINE GLUCOSIDASE (PTHR11051:SF8)	glycosidase(PC00110)	Xenopus tropicalis
ORYLA|Ensembl=ENSORLG00000002906|UniProtKB=A0A3B3IGP1	MDH1	Malate dehydrogenase;mdh1;ortholog	MALATE DEHYDROGENASE, CYTOPLASMIC (PTHR23382:SF3)	dehydrogenase(PC00092)	Oryzias latipes
MOUSE|MGI=MGI=88467|UniProtKB=P11087	COL1A1	Collagen alpha-1(I) chain;Col1a1;ortholog	COLLAGEN ALPHA-1(I) CHAIN (PTHR24023:SF569)	extracellular matrix structural protein(PC00103)	Mus musculus
XANCP|EnsemblGenome=XCC0929|UniProtKB=P45875	GST	Glutathione S-transferase GST-4.5;gst;ortholog	GLUTATHIONE S-TRANSFERASE GSTA (PTHR44051:SF10)	transferase(PC00220)	Xanthomonas campestris
SOYBN|EnsemblGenome=GLYMA_20G033800|UniProtKB=C6T4A0	CASP6	CASP-like protein 6;unassigned;ortholog	CASP-LIKE PROTEIN 6 (PTHR11615:SF252)	dehydrogenase(PC00092)	Glycine max
PIG|Ensembl=ENSSSCG00000003385|UniProtKB=Q0R678	PARK7	Maillard deglycase;PARK7;ortholog	PARKINSON DISEASE PROTEIN 7 HOMOLOG (PTHR48094:SF12)		Sus scrofa
ANOCA|Ensembl=ENSACAG00000015925|UniProtKB=G1KRY9	TXNRD1	Uncharacterized protein;TXNRD1;ortholog	THIOREDOXIN REDUCTASE 1, CYTOPLASMIC (PTHR48105:SF7)	reductase(PC00198)	Anolis carolinensis
BOVIN|Gene=P4HB|UniProtKB=P05307	PDI,P4HB	Protein disulfide-isomerase;P4HB;ortholog	PROTEIN DISULFIDE-ISOMERASE (PTHR18929:SF101)	chaperone(PC00072)	Bos taurus
DICDI|dictyBase=DDB_G0276835|UniProtKB=Q86B00	glnA	Type-1 glutamine synthetase 1;glnA1;ortholog	TYPE-1 GLUTAMINE SYNTHETASE 1 (PTHR43785:SF2)	ligase(PC00142)	Dictyostelium discoideum
MACMU|Ensembl=ENSMMUG00000019546|UniProtKB=F7CQV0	Rgn	Gluconolactonase;RGN;ortholog	REGUCALCIN (PTHR10907:SF54)	esterase(PC00097)	Macaca mulatta
FELCA|Ensembl=ENSFCAG00000013294|UniProtKB=A0A2I2UJV6	SLC44A1	Solute carrier family 44 member 1;SLC44A1;ortholog	CHOLINE TRANSPORTER-LIKE PROTEIN 1 (PTHR12385:SF56)	secondary carrier transporter(PC00258)	Felis catus
HUMAN|HGNC=983|UniProtKB=P06276	Bche	Cholinesterase;BCHE;ortholog	CHOLINESTERASE (PTHR43918:SF5)	esterase(PC00097)	Homo sapiens
BOVIN|Ensembl=ENSBTAG00000009757|UniProtKB=P26452	Rpsa	40S ribosomal protein SA;RPSA;ortholog	40S RIBOSOMAL PROTEIN SA (PTHR11489:SF9)	ribosomal protein(PC00202)	Bos taurus
PANTR|Ensembl=ENSPTRG00000018671|UniProtKB=H2QTV0	FUCA2	Alpha-L-fucosidase;FUCA2;ortholog	PLASMA ALPHA-L-FUCOSIDASE (PTHR10030:SF45)	glycosidase(PC00110)	Pan troglodytes
HUMAN|HGNC=4430|UniProtKB=O95249	GOSR1	Golgi SNAP receptor complex member 1;GOSR1;ortholog	GOLGI SNAP RECEPTOR COMPLEX MEMBER 1 (PTHR21094:SF2)	SNARE protein(PC00034)	Homo sapiens
SYNY3|EnsemblGenome=BAA16740|UniProtKB=P27178	ATP6	ATP synthase subunit a;atpB;ortholog	ATP SYNTHASE SUBUNIT A (PTHR11410:SF0)	ATP synthase(PC00002)	Synechocystis
GORGO|Ensembl=ENSGGOG00000004642|UniProtKB=G3QPP8	FABP6	Fatty acid binding protein 6;FABP6;ortholog	GASTROTROPIN (PTHR11955:SF69)	transfer/carrier protein(PC00219)	Gorilla gorilla gorilla
ORNAN|Ensembl=ENSOANG00000013012|UniProtKB=F6S948	CTSB	Cathepsin B;CTSB;ortholog	CATHEPSIN B (PTHR12411:SF16)	cysteine protease(PC00081)	Ornithorhynchus anatinus
PANTR|Ensembl=ENSPTRG00000005966|UniProtKB=A0A2I3SUR0	DCT	Dopachrome tautomerase;DCT;ortholog	L-DOPACHROME TAUTOMERASE (PTHR11474:SF4)	oxygenase(PC00177)	Pan troglodytes
MACMU|Ensembl=ENSMMUG00000004392|UniProtKB=G7NLC3	CALR	Calreticulin;CALR;ortholog	CALRETICULIN (PTHR11073:SF16)	chaperone(PC00072)	Macaca mulatta
FELCA|Ensembl=ENSFCAG00000009957|UniProtKB=M3WCF8	MOXD1	Monooxygenase DBH like 1;MOXD1;ortholog	DBH-LIKE MONOOXYGENASE PROTEIN 1 (PTHR10157:SF28)	hydroxylase(PC00122)	Felis catus
PIG|Ensembl=ENSSSCG00000013878|UniProtKB=A0A286ZS31	PGLS	6-phosphogluconolactonase;PGLS;ortholog	6-PHOSPHOGLUCONOLACTONASE (PTHR11054:SF0)	hydrolase(PC00121)	Sus scrofa
RAT|RGD=620766|UniProtKB=Q6P7D7	TMPRSS2	Transmembrane protease, serine 2;Tmprss2;ortholog	TRANSMEMBRANE PROTEASE SERINE 2 (PTHR24253:SF89)	serine protease(PC00203)	Rattus norvegicus
PANTR|Ensembl=ENSPTRG00000007441|UniProtKB=H2QA26	ANPEP	Aminopeptidase;ANPEP;ortholog	AMINOPEPTIDASE N (PTHR11533:SF172)	metalloprotease(PC00153)	Pan troglodytes
SYNY3|Gene=suhB|UniProtKB=P73806	suhB	Histidinol-phosphatase;suhB;ortholog	3'(2'),5'-BISPHOSPHATE NUCLEOTIDASE (PTHR43200:SF6)	phosphatase(PC00181)	Synechocystis
ORYLA|Ensembl=ENSORLG00000017428|UniProtKB=A0A3B3H840	TYMP	Thymidine phosphorylase;TYMP;ortholog	THYMIDINE PHOSPHORYLASE (PTHR10515:SF0)	glycosyltransferase(PC00111)	Oryzias latipes
GORGO|Gene=MT-ATP6|UniProtKB=Q9T9Y7	ATP6	ATP synthase subunit a;MT-ATP6;ortholog	ATP SYNTHASE SUBUNIT A (PTHR11410:SF0)	ATP synthase(PC00002)	Gorilla gorilla gorilla
NEUCR|EnsemblGenome=NCU03911|UniProtKB=Q9P5K9	CAPZA	F-actin-capping protein subunit alpha;fac-1;ortholog	F-ACTIN-CAPPING PROTEIN SUBUNIT ALPHA (PTHR10653:SF0)	non-motor actin binding protein(PC00165)	Neurospora crassa
ARATH|EnsemblGenome=AT4G14147|UniProtKB=F4JUL9	ARPC4	Actin-related protein 2/3 complex subunit 4;ARPC4;ortholog	ACTIN-RELATED PROTEIN 2/3 COMPLEX SUBUNIT 4 (PTHR22629:SF0)	actin or actin-binding cytoskeletal protein(PC00041)	Arabidopsis thaliana
CANLF|Ensembl=ENSCAFG00000000234|UniProtKB=F6XCZ4	AHI1	Uncharacterized protein;AHI1;ortholog	JOUBERIN (PTHR44499:SF1)		Canis lupus familiaris
MOUSE|MGI=MGI=894689|UniProtKB=P62259	YWHAE	14-3-3 protein epsilon;Ywhae;ortholog	14-3-3 PROTEIN EPSILON (PTHR18860:SF151)	scaffold/adaptor protein(PC00226)	Mus musculus
BOVIN|Ensembl=ENSBTAG00000006615|UniProtKB=F1MD58	CASP7	Caspase 7;CASP7;ortholog	CASPASE-7 (PTHR10454:SF31)	protease(PC00190)	Bos taurus
GORGO|Ensembl=ENSGGOG00000003294|UniProtKB=G3QL89	NQO1	NAD(P)H quinone dehydrogenase 1;NQO1;ortholog	NAD(P)H DEHYDROGENASE [QUINONE] 1 (PTHR10204:SF1)	oxidoreductase(PC00176)	Gorilla gorilla gorilla
DANRE|ZFIN=ZDB-GENE-030131-542|UniProtKB=Q4F876	CNN2	Calponin;cnn2;ortholog	CALPONIN-2 (PTHR47385:SF7)		Danio rerio
ORNAN|Ensembl=ENSOANG00000029842|UniProtKB=K7E9C2	ITIH3	Inter-alpha-trypsin inhibitor heavy chain 3;ITIH3;ortholog	INTER-ALPHA-TRYPSIN INHIBITOR HEAVY CHAIN H3 (PTHR10338:SF115)	protease inhibitor(PC00191)	Ornithorhynchus anatinus
TOBAC|Gene_ORFName=NitaMp014|UniProtKB=A0A0M4JB70	ATP6	ATP synthase subunit a;atp6;ortholog	ATP SYNTHASE SUBUNIT A (PTHR11410:SF0)	ATP synthase(PC00002)	Nicotiana tabacum
WHEAT|Gene=PDI|UniProtKB=P52589	PDI	Protein disulfide-isomerase;PDI;ortholog	PROTEIN DISULFIDE-ISOMERASE A3 (PTHR18929:SF132)	chaperone(PC00072)	Triticum aestivum
HUMAN|HGNC=1507|UniProtKB=P55212	CASP6	Caspase-6;CASP6;ortholog	CASPASE-6 (PTHR10454:SF206)	protease(PC00190)	Homo sapiens
CHICK|Ensembl=ENSGALG00000029583|UniProtKB=A0A1D5P1C6	PLBD1	Phospholipase B-like;PLBD1;ortholog	PHOSPHOLIPASE B-LIKE 1 (PTHR12370:SF1)	phospholipase(PC00186)	Gallus gallus
GORGO|Ensembl=ENSGGOG00000025089|UniProtKB=G3S156	PRDX2	Peroxiredoxin 2;PRDX2;ortholog	PEROXIREDOXIN-2 (PTHR10681:SF161)	peroxidase(PC00180)	Gorilla gorilla gorilla
BOVIN|Ensembl=ENSBTAG00000007467|UniProtKB=E1BJ09	MIB1	RING-type E3 ubiquitin transferase;MIB1;ortholog	E3 UBIQUITIN-PROTEIN LIGASE MIB1 (PTHR24202:SF53)	ubiquitin-protein ligase(PC00234)	Bos taurus
MOUSE|MGI=MGI=1859516|UniProtKB=P62858	RPS28	40S ribosomal protein S28;Rps28;ortholog	40S RIBOSOMAL PROTEIN S28 (PTHR10769:SF3)	ribosomal protein(PC00202)	Mus musculus
CAPAN|EnsemblGenome=T459_09470|UniProtKB=O49815	CA1	Beta-carotene hydroxylase 1, chloroplastic;CA1;ortholog	BETA-CAROTENE 3-HYDROXYLASE 1, CHLOROPLASTIC (PTHR31899:SF9)	hydroxylase(PC00122)	Capsicum annuum
FELCA|Ensembl=ENSFCAG00000011393|UniProtKB=A0A2I2V3V8	FLNA	Filamin A;FLNA;ortholog	FILAMIN-A (PTHR38537:SF5)		Felis catus
MACMU|Ensembl=ENSMMUG00000008670|UniProtKB=F7F3C2	SHB	SH2 domain containing adaptor protein B;SHB;ortholog	SH2 DOMAIN-CONTAINING ADAPTER PROTEIN B (PTHR15127:SF31)		Macaca mulatta
MOUSE|MGI=MGI=95288|UniProtKB=P58252	EEF2	Elongation factor 2;Eef2;ortholog	ELONGATION FACTOR 2 (PTHR42908:SF35)	translation elongation factor(PC00222)	Mus musculus
LEPOC|Ensembl=ENSLOCG00000008617|UniProtKB=W5MQ18	Rps3a	40S ribosomal protein S3a;RPS3A;ortholog	40S RIBOSOMAL PROTEIN S3A (PTHR11830:SF0)	ribosomal protein(PC00202)	lepisosteus oculatus
ORNAN|Ensembl=ENSOANG00000014032|UniProtKB=F6Q9N0	EEF2	Tr-type G domain-containing protein;EEF2;ortholog	ELONGATION FACTOR 2 (PTHR42908:SF35)	translation elongation factor(PC00222)	Ornithorhynchus anatinus
HUMAN|HGNC=3208|UniProtKB=P24534	EEF1B	Elongation factor 1-beta;EEF1B2;ortholog	ELONGATION FACTOR 1-BETA (PTHR11595:SF60)	translation elongation factor(PC00222)	Homo sapiens
CANLF|Ensembl=ENSCAFG00000013617|UniProtKB=F1PZA1	Idh1	Isocitrate dehydrogenase [NADP];IDH1;ortholog	ISOCITRATE DEHYDROGENASE [NADP] CYTOPLASMIC (PTHR11822:SF21)	dehydrogenase(PC00092)	Canis lupus familiaris
XENTR|Ensembl=ENSXETG00000016627|UniProtKB=A0A6I8Q1K0	EML5	Echinoderm microtubule associated protein like 5;eml5;ortholog	ECHINODERM MICROTUBULE-ASSOCIATED PROTEIN-LIKE 5 (PTHR13720:SF16)	microtubule or microtubule-binding cytoskeletal protein(PC00157)	Xenopus tropicalis
SOLLC|EnsemblGenome=Solyc09g050030.1|UniProtKB=K4CT01	RPS14	Ribosomal protein S14;rps14;ortholog			Solanum lycopersicum
CHICK|Ensembl=ENSGALG00000010639|UniProtKB=E1C683	EML5	Uncharacterized protein;EML5;ortholog	ECHINODERM MICROTUBULE-ASSOCIATED PROTEIN-LIKE 5 (PTHR13720:SF16)	microtubule or microtubule-binding cytoskeletal protein(PC00157)	Gallus gallus
HUMAN|HGNC=4601|UniProtKB=P28799	GRN	Progranulin;GRN;ortholog	PROGRANULIN (PTHR12274:SF3)		Homo sapiens
DROME|FlyBase=FBgn0001138|UniProtKB=P91623	GRN	GATA-binding factor C;grn;ortholog	BOX A-BINDING FACTOR-RELATED (PTHR10071:SF281)	DNA-binding transcription factor(PC00218)	Drosophila melanogaster
FELCA|Ensembl=ENSFCAG00000006927|UniProtKB=A0A5F5XQT9	TEP1	Telomerase associated protein 1;TEP1;ortholog	TELOMERASE PROTEIN COMPONENT 1 (PTHR44791:SF1)	DNA metabolism protein(PC00009)	Felis catus
MOUSE|MGI=MGI=98388|UniProtKB=Q62261	SPTBN1	Spectrin beta chain, non-erythrocytic 1;Sptbn1;ortholog	SPECTRIN BETA CHAIN, NON-ERYTHROCYTIC 1 (PTHR11915:SF226)	actin or actin-binding cytoskeletal protein(PC00041)	Mus musculus
CANLF|Ensembl=ENSCAFG00000005026|UniProtKB=E2RNY1	HNRNPUL1	Heterogeneous nuclear ribonucleoprotein U like 1;HNRNPUL1;ortholog	HETEROGENEOUS NUCLEAR RIBONUCLEOPROTEIN U-LIKE PROTEIN 1 (PTHR12381:SF41)		Canis lupus familiaris
CANLF|Ensembl=ENSCAFG00000000593|UniProtKB=A0A5F4CN92	LMNB1	Lamin B1;LMNB1;ortholog	LAMIN-B1 (PTHR45721:SF3)		Canis lupus familiaris
FELCA|Ensembl=ENSFCAG00000022602|UniProtKB=M3XE20	RPS8	40S ribosomal protein S8;RPS8;ortholog	40S RIBOSOMAL PROTEIN S8 (PTHR10394:SF3)	ribosomal protein(PC00202)	Felis catus
LEIMA|EnsemblGenome=LMJF_07_1030|UniProtKB=Q4QII4	PIN1	Peptidyl-prolyl cis-trans isomerase;PIN1;ortholog	PEPTIDYL-PROLYL CIS-TRANS ISOMERASE-RELATED (PTHR10657:SF4)	chaperone(PC00072)	Leishmania major
CANLF|Ensembl=ENSCAFG00000011815|UniProtKB=A0A5F4BXB9	PNLIP	Triacylglycerol lipase;PNLIP;ortholog	PANCREATIC TRIACYLGLYCEROL LIPASE (PTHR11610:SF147)	lipase(PC00143)	Canis lupus familiaris
RAT|Ensembl=ENSRNOG00000047459|UniProtKB=P15865	H1D	Histone H1.4;H1-4;ortholog	HISTONE H1.4 (PTHR11467:SF20)	chromatin/chromatin-binding, or -regulatory protein(PC00077)	Rattus norvegicus
LEIMA|EnsemblGenome=LMJF_05_0060|UniProtKB=Q4QJJ7	MVP	Major vault protein;LMJF_05_0060;ortholog	MAJOR VAULT PROTEIN (PTHR14165:SF3)	scaffold/adaptor protein(PC00226)	Leishmania major
CANLF|Ensembl=ENSCAFG00000015152|UniProtKB=A0A5F4DFI6	CAPZB	CapZ beta;CAPZB;ortholog	F-ACTIN-CAPPING PROTEIN SUBUNIT BETA (PTHR10619:SF0)	non-motor actin binding protein(PC00165)	Canis lupus familiaris
HUMAN|HGNC=11277|UniProtKB=O15269	SPTLC1	Serine palmitoyltransferase 1;SPTLC1;ortholog	SERINE PALMITOYLTRANSFERASE 1 (PTHR13693:SF2)	transaminase(PC00216)	Homo sapiens
MOUSE|MGI=MGI=1096398|UniProtKB=P35762	CD81	CD81 antigen;Cd81;ortholog	CD81 ANTIGEN (PTHR19282:SF214)	scaffold/adaptor protein(PC00226)	Mus musculus
CHICK|Gene=LMNB1|UniProtKB=P14731	LMNB1	Lamin-B1;LMNB1;ortholog	LAMIN-B1 (PTHR45721:SF3)		Gallus gallus
GORGO|Ensembl=ENSGGOG00000001167|UniProtKB=G3QFS2	CTSB	Cathepsin B;CTSB;ortholog	CATHEPSIN B (PTHR12411:SF16)	cysteine protease(PC00081)	Gorilla gorilla gorilla
GORGO|Ensembl=ENSGGOG00000009517|UniProtKB=G3RTB6	TGFBI	Transforming growth factor-beta-induced protein ig-h3;TGFBI;ortholog	TRANSFORMING GROWTH FACTOR-BETA-INDUCED PROTEIN IG-H3 (PTHR10900:SF82)	cell adhesion molecule(PC00069)	Gorilla gorilla gorilla
CANLF|Ensembl=ENSCAFG00000008945|UniProtKB=F1PSS7	SLIT1	Slit guidance ligand 1;SLIT1;ortholog	SLIT HOMOLOG 1 PROTEIN (PTHR45836:SF3)		Canis lupus familiaris
CHICK|Ensembl=ENSGALG00000012004|UniProtKB=F1NH25	PRSS12	Uncharacterized protein;PRSS12;ortholog	NEUROTRYPSIN (PTHR48071:SF5)		Gallus gallus
BACCR|EnsemblGenome=BC_3617|UniProtKB=Q81AF5	SSPO	Small, acid-soluble spore protein O;sspO;ortholog			Bacillus cereus
MOUSE|MGI=MGI=2448523|UniProtKB=Q6NSR8	NPEPL1	Probable aminopeptidase NPEPL1;Npepl1;ortholog	AMINOPEPTIDASE NPEPL1-RELATED (PTHR11963:SF4)	metalloprotease(PC00153)	Mus musculus
HORSE|Ensembl=ENSECAG00000029465|UniProtKB=A0A3Q2HY77	CHI3L1	Chitinase-3-like protein 1;CHI3L1;ortholog	CHITINASE-3-LIKE PROTEIN 1 (PTHR11177:SF202)	glycosidase(PC00110)	Equus caballus
HORSE|Ensembl=ENSECAG00000008015|UniProtKB=F7E3T4	SHB	SH2 domain containing adaptor protein B;SHB;ortholog	SH2 DOMAIN-CONTAINING ADAPTER PROTEIN B (PTHR15127:SF31)		Equus caballus
FELCA|Ensembl=ENSFCAG00000015611|UniProtKB=M3WMY0	ARPC5	Actin-related protein 2/3 complex subunit 5;ARPC5;ortholog	ACTIN-RELATED PROTEIN 2/3 COMPLEX SUBUNIT 5 (PTHR12644:SF1)	actin or actin-binding cytoskeletal protein(PC00041)	Felis catus
XENTR|Xenbase=XB-GENE-959575|UniProtKB=A0A6I8SQB2	ADAMTS12	ADAM metallopeptidase with thrombospondin type 1 motif 12;adamts12;ortholog	A DISINTEGRIN AND METALLOPROTEINASE WITH THROMBOSPONDIN MOTIFS 12 (PTHR13723:SF189)	metalloprotease(PC00153)	Xenopus tropicalis
MACMU|Ensembl=ENSMMUG00000008776|UniProtKB=F7F6H0	PRDX6	Peroxiredoxin-6;PRDX6;ortholog	PEROXIREDOXIN-6 (PTHR43503:SF4)	peroxidase(PC00180)	Macaca mulatta
CHICK|Gene=H1_CHICK|UniProtKB=P09987	H1	Histone H1;unassigned;ortholog	H15 DOMAIN-CONTAINING PROTEIN-RELATED (PTHR11467:SF167)	chromatin/chromatin-binding, or -regulatory protein(PC00077)	Gallus gallus
HUMAN|HGNC=16369|UniProtKB=Q99497	PARK7	Parkinson disease protein 7;PARK7;ortholog	PARKINSON DISEASE PROTEIN 7 (PTHR48094:SF16)		Homo sapiens
MOUSE|MGI=MGI=1928679|UniProtKB=Q9EQF5	DPYS	Dihydropyrimidinase;Dpys;ortholog	DIHYDROPYRIMIDINASE (PTHR11647:SF50)	hydrolase(PC00121)	Mus musculus
GEOSL|EnsemblGenome=GSU3207|UniProtKB=Q747Q8	gpmA	2,3-bisphosphoglycerate-independent phosphoglycerate mutase;gpmI;ortholog	2,3-BISPHOSPHOGLYCERATE-INDEPENDENT PHOSPHOGLYCERATE MUTASE (PTHR31637:SF0)	mutase(PC00160)	Geobacter sulfurreducens
XENTR|Ensembl=ENSXETG00000000784|UniProtKB=F7E2S1	HEBP2	Heme binding protein 2;hebp2;ortholog	HEME-BINDING PROTEIN 2 (PTHR11220:SF69)		Xenopus tropicalis
DROME|FlyBase=FBgn0001149|UniProtKB=P20432	GST	Glutathione S-transferase D1;GstD1;ortholog	GLUTATHIONE S TRANSFERASE D10, ISOFORM A-RELATED (PTHR43969:SF9)	transferase(PC00220)	Drosophila melanogaster
ORNAN|Ensembl=ENSOANG00000043355|UniProtKB=A0A6I8NXH4	ALDH6A1	Aldehyde dehydrogenase 6 family member A1;ALDH6A1;ortholog	METHYLMALONATE-SEMIALDEHYDE DEHYDROGENASE [ACYLATING], MITOCHONDRIAL (PTHR43866:SF3)	dehydrogenase(PC00092)	Ornithorhynchus anatinus
ANOCA|Ensembl=ENSACAG00000000921|UniProtKB=H9GUE0	MOXD1	DOMON domain-containing protein;MOXD1;ortholog	DBH-LIKE MONOOXYGENASE PROTEIN 1 (PTHR10157:SF28)	hydroxylase(PC00122)	Anolis carolinensis
XENTR|Xenbase=XB-GENE-1011098|UniProtKB=A0A6I8PTH1	MME	Atriopeptidase;mme;ortholog	NEPRILYSIN (PTHR11733:SF114)	metalloprotease(PC00153)	Xenopus tropicalis
RAT|RGD=1359472|UniProtKB=E9PT65	RDX	Radixin;Rdx;ortholog	RADIXIN (PTHR23281:SF14)	actin or actin-binding cytoskeletal protein(PC00041)	Rattus norvegicus
HALSA|EnsemblGenome=VNG_1332G|UniProtKB=P09224	SOD1	Superoxide dismutase [Mn] 2;sod2;ortholog	37S RIBOSOMAL PROTEIN S26, MITOCHONDRIAL (PTHR43595:SF2)	ribosomal protein(PC00202)	Halobacterium salinarum
HALSA|EnsemblGenome=VNG_0896G|UniProtKB=Q9HR24	CDA	Cytidine aminohydrolase;cda;ortholog	CYTIDINE DEAMINASE (PTHR11644:SF2)	deaminase(PC00088)	Halobacterium salinarum
PIG|Ensembl=ENSSSCG00000005425|UniProtKB=K7GM61	SLC44A1	Solute carrier family 44 member 1;SLC44A1;ortholog	CHOLINE TRANSPORTER-LIKE PROTEIN 1 (PTHR12385:SF56)	secondary carrier transporter(PC00258)	Sus scrofa
HUMAN|Gene=HERVK_113|UniProtKB=Q902F9	TM	Endogenous retrovirus group K member 113 Env polyprotein;HERVK_113;ortholog	ENDOGENOUS RETROVIRUS GROUP K MEMBER 113 ENV POLYPROTEIN-RELATED (PTHR34313:SF2)	viral or transposable element protein(PC00237)	Homo sapiens
ORNAN|Ensembl=ENSOANG00000013448|UniProtKB=A0A6I8NSY4	CNDP2	Carnosine dipeptidase 2;CNDP2;ortholog	CYTOSOLIC NON-SPECIFIC DIPEPTIDASE (PTHR43270:SF11)	metalloprotease(PC00153)	Ornithorhynchus anatinus
ORNAN|Ensembl=ENSOANG00000013538|UniProtKB=F7DNV6	CORO2B	Coronin;CORO2B;ortholog	CORONIN-2B (PTHR10856:SF17)	non-motor actin binding protein(PC00165)	Ornithorhynchus anatinus
DANRE|ZFIN=ZDB-GENE-020419-5|UniProtKB=Q7T2P2	CCT3	T-complex protein 1 subunit gamma;cct3;ortholog	T-COMPLEX PROTEIN 1 SUBUNIT GAMMA (PTHR11353:SF24)	chaperonin(PC00073)	Danio rerio
XENTR|Ensembl=ENSXETG00000038483|UniProtKB=B1WAW7	GOSR1	Golgi SNAP receptor complex member 1;gosr1;ortholog	GOLGI SNAP RECEPTOR COMPLEX MEMBER 1 (PTHR21094:SF2)	SNARE protein(PC00034)	Xenopus tropicalis
RAT|RGD=1549716|UniProtKB=Q700K0	SSPO	SCO-spondin;Sspo;ortholog	SCO-SPONDIN (PTHR11339:SF396)	extracellular matrix protein(PC00102)	Rattus norvegicus
ORNAN|Ensembl=ENSOANG00000006529|UniProtKB=F6YAT8	MPI	Mannose-6-phosphate isomerase;MPI;ortholog	MANNOSE-6-PHOSPHATE ISOMERASE (PTHR10309:SF0)	isomerase(PC00135)	Ornithorhynchus anatinus
FELCA|Ensembl=ENSFCAG00000027444|UniProtKB=M3X7Z9	TUBB	Tubulin beta chain;TUBB;ortholog	TUBULIN BETA CHAIN (PTHR11588:SF61)	tubulin(PC00228)	Felis catus
MOUSE|MGI=MGI=95698|UniProtKB=P47856	GFPT1	Glutamine--fructose-6-phosphate aminotransferase [isomerizing] 1;Gfpt1;ortholog	GLUTAMINE--FRUCTOSE-6-PHOSPHATE AMINOTRANSFERASE [ISOMERIZING] 1 (PTHR10937:SF12)	transaminase(PC00216)	Mus musculus
BOVIN|Ensembl=ENSBTAG00000002882|UniProtKB=A0A3Q1LNG7	LMNB1	Lamin B1;LMNB1;ortholog	LAMIN-B1 (PTHR45721:SF3)		Bos taurus
CANLF|Ensembl=ENSCAFG00000000309|UniProtKB=A0A5F4D6T1	FUCA2	Alpha-L-fucosidase;FUCA2;ortholog	PLASMA ALPHA-L-FUCOSIDASE (PTHR10030:SF45)	glycosidase(PC00110)	Canis lupus familiaris
HORSE|Ensembl=ENSECAG00000014408|UniProtKB=A0A5F5PVF7	PLS1	Plastin 1;PLS1;ortholog	PLASTIN-1 (PTHR19961:SF27)	non-motor actin binding protein(PC00165)	Equus caballus
CAEEL|WormBase=WBGene00000552|UniProtKB=O16305	CALM	Calmodulin;cmd-1;ortholog	CALCIUM-BINDING PROTEIN E63-1 (PTHR23050:SF518)	calmodulin-related(PC00061)	Caenorhabditis elegans
CHICK|Ensembl=ENSGALG00000030705|UniProtKB=A0A1D5NX84	TRABD	Uncharacterized protein;TRABD;ortholog	TRAB DOMAIN-CONTAINING PROTEIN (PTHR21530:SF7)		Gallus gallus
HELPY|EnsemblGenome=HP_0176|UniProtKB=P56109	FBPA	Fructose-bisphosphate aldolase;fba;ortholog	D-TAGATOSE-1,6-BISPHOSPHATE ALDOLASE SUBUNIT GATY-RELATED (PTHR30304:SF0)	aldolase(PC00044)	Helicobacter pylori
DICDI|dictyBase=DDB_G0279407|UniProtKB=P02599	CALM	Calmodulin;calA;ortholog	CALMODULIN (PTHR23050:SF523)	calmodulin-related(PC00061)	Dictyostelium discoideum
SCHPO|PomBase=SPBC25H2.02|UniProtKB=P87144	THS1	Threonine--tRNA ligase, cytoplasmic;trs1;ortholog	THREONYL-TRNA SYNTHETASE (PTHR11451:SF46)	aminoacyl-tRNA synthetase(PC00047)	Schizosaccharomyces pombe
PANTR|Ensembl=ENSPTRG00000007287|UniProtKB=H2Q9T4	MPI	Mannose-6-phosphate isomerase;MPI;ortholog	MANNOSE-6-PHOSPHATE ISOMERASE (PTHR10309:SF0)	isomerase(PC00135)	Pan troglodytes
SCHPO|PomBase=SPBC19C2.07|UniProtKB=P36580	FBA1,FBPA	Fructose-bisphosphate aldolase;fba1;ortholog	FRUCTOSE-BISPHOSPHATE ALDOLASE (PTHR30559:SF0)	aldolase(PC00044)	Schizosaccharomyces pombe
XENTR|Gene=wdr1|UniProtKB=Q6DIF4	AIP1	WD repeat-containing protein 1;wdr1;ortholog	WD REPEAT-CONTAINING PROTEIN 1 (PTHR19856:SF0)	non-motor actin binding protein(PC00165)	Xenopus tropicalis
FELCA|Ensembl=ENSFCAG00000026764|UniProtKB=A0A2I2UI55	Twf1	Twinfilin actin binding protein 1;TWF1;ortholog	TWINFILIN-1 (PTHR13759:SF8)	non-motor actin binding protein(PC00165)	Felis catus
CHICK|Ensembl=ENSGALG00000041760|UniProtKB=A0A1D5P650	CLTCL1	Clathrin heavy chain;CLTCL1;ortholog	CLATHRIN HEAVY CHAIN 2 (PTHR10292:SF6)	vesicle coat protein(PC00235)	Gallus gallus
PHANO|Gene_ORFName=SNOG_06790|UniProtKB=P41799	TUBB,tubA	Tubulin beta chain;tubB;ortholog	TUBULIN BETA-1 CHAIN-RELATED (PTHR11588:SF429)	tubulin(PC00228)	Phaeosphaeria nodorum
SOLTU|Gene=rps8|UniProtKB=Q2VEE5	RPS8	30S ribosomal protein S8, chloroplastic;rps8;ortholog	37S RIBOSOMAL PROTEIN S8, MITOCHONDRIAL (PTHR11758:SF4)	ribosomal protein(PC00202)	Solanum tuberosum
LEPOC|Ensembl=ENSLOCG00000014236|UniProtKB=W5NA76	HNRNPUL1	Heterogeneous nuclear ribonucleoprotein U like 1;HNRNPUL1;ortholog	HETEROGENEOUS NUCLEAR RIBONUCLEOPROTEIN U-LIKE PROTEIN 1 (PTHR12381:SF41)		lepisosteus oculatus
HUMAN|HGNC=9475|UniProtKB=P07477	PRSS1	Trypsin-1;PRSS1;ortholog	TRYPSIN-1 (PTHR24264:SF57)	serine protease(PC00203)	Homo sapiens
SOLLC|Gene=ACT3_SOLLC|UniProtKB=Q96484	act3	Actin-52 (Fragment);unassigned;ortholog	ACTIN-58 (PTHR11937:SF515)	actin and actin related protein(PC00039)	Solanum lycopersicum
BOVIN|Ensembl=ENSBTAG00000006396|UniProtKB=Q3ZBD7	GPI	Glucose-6-phosphate isomerase;GPI;ortholog	GLUCOSE-6-PHOSPHATE ISOMERASE (PTHR11469:SF1)	isomerase(PC00135)	Bos taurus
SCHPO|PomBase=SPCC24B10.21|UniProtKB=P07669	TPI	Triosephosphate isomerase;tpi1;ortholog	TRIOSEPHOSPHATE ISOMERASE (PTHR21139:SF2)	isomerase(PC00135)	Schizosaccharomyces pombe
ORYLA|Ensembl=ENSORLG00000013676|UniProtKB=P79818	ACTB	Actin, cytoplasmic 1;actb;ortholog	ACTIN, CYTOPLASMIC 1 (PTHR11937:SF533)	actin and actin related protein(PC00039)	Oryzias latipes
MOUSE|MGI=MGI=98797|UniProtKB=P17751	TPI	Triosephosphate isomerase;Tpi1;ortholog	TRIOSEPHOSPHATE ISOMERASE (PTHR21139:SF2)	isomerase(PC00135)	Mus musculus
STRPU|Gene=ATP6|UniProtKB=P15995	ATP6	ATP synthase subunit a;ATP6;ortholog	ATP SYNTHASE SUBUNIT A (PTHR11410:SF0)	ATP synthase(PC00002)	Strongylocentrotus purpuratus
RAT|RGD=1303275|UniProtKB=Q6ED65	EML5	Echinoderm microtubule-associated protein-like 5;Eml5;ortholog	ECHINODERM MICROTUBULE-ASSOCIATED PROTEIN-LIKE 5 (PTHR13720:SF16)	microtubule or microtubule-binding cytoskeletal protein(PC00157)	Rattus norvegicus
CHLRE|EnsemblGenome=CHLRE_05g248400v5|UniProtKB=P93108	CA1	Carbonic anhydrase;ca1;ortholog	CARBONIC ANHYDRASE (PTHR11002:SF76)	dehydratase(PC00091)	Chlamydomonas reinhardtii
HORSE|Ensembl=ENSECAG00000019343|UniProtKB=A0A3Q2KZJ6	ALDH1A1	Retinal dehydrogenase 1;ALDH1A1;ortholog	RETINAL DEHYDROGENASE 1 (PTHR11699:SF140)	dehydrogenase(PC00092)	Equus caballus
MONDO|Ensembl=ENSMODG00000005497|UniProtKB=F7BXL6	TRABD	TraB domain containing;TRABD;ortholog	TRAB DOMAIN-CONTAINING PROTEIN (PTHR21530:SF7)		Monodelphis domestica
RAT|RGD=621724|UniProtKB=P04182	OAT	Ornithine aminotransferase, mitochondrial;Oat;ortholog	ORNITHINE AMINOTRANSFERASE, MITOCHONDRIAL (PTHR11986:SF18)	transaminase(PC00216)	Rattus norvegicus
PIG|Ensembl=ENSSSCG00000015560|UniProtKB=B5APV0	ARPC5	Actin-related protein 2/3 complex subunit 5;ARPC5;ortholog	ACTIN-RELATED PROTEIN 2/3 COMPLEX SUBUNIT 5 (PTHR12644:SF1)	actin or actin-binding cytoskeletal protein(PC00041)	Sus scrofa
MOUSE|MGI=MGI=2136886|UniProtKB=Q99PI8	RTN4R	Reticulon-4 receptor;Rtn4r;ortholog	RETICULON-4 RECEPTOR (PTHR45836:SF6)		Mus musculus
SOLTU|EnsemblGenome=PGSC0003DMG400025120|UniProtKB=M1CCP9	ASC1	ASC1;102598384;ortholog	CERAMIDE SYNTHASE 1 LOH3 (PTHR12560:SF49)	transferase(PC00220)	Solanum tuberosum
YEAST|SGD=S000003778|UniProtKB=P22696	PIN1	Peptidyl-prolyl cis-trans isomerase ESS1;ESS1;ortholog	PEPTIDYL-PROLYL CIS-TRANS ISOMERASE-RELATED (PTHR10657:SF4)	chaperone(PC00072)	Saccharomyces cerevisiae
HUMAN|HGNC=12437|UniProtKB=Q16881	TXNRD1	Thioredoxin reductase 1, cytoplasmic;TXNRD1;ortholog	THIOREDOXIN REDUCTASE 1, CYTOPLASMIC (PTHR48105:SF7)	reductase(PC00198)	Homo sapiens
BOVIN|Ensembl=ENSBTAG00000015562|UniProtKB=Q9GL30	PLBD1	Phospholipase B-like 1;PLBD1;ortholog	PHOSPHOLIPASE B-LIKE 1 (PTHR12370:SF1)	phospholipase(PC00186)	Bos taurus
MOUSE|MGI=MGI=1921582|UniProtKB=Q9CXI3	MOXD1	DBH-like monooxygenase protein 1;Moxd1;ortholog	DBH-LIKE MONOOXYGENASE PROTEIN 1 (PTHR10157:SF28)	hydroxylase(PC00122)	Mus musculus
ANOCA|Ensembl=ENSACAG00000015491|UniProtKB=G1KR72	PRDX6	Peroxiredoxin-6;PRDX6;ortholog	PEROXIREDOXIN-6 (PTHR43503:SF4)	peroxidase(PC00180)	Anolis carolinensis
FELCA|Ensembl=ENSFCAG00000036330|UniProtKB=A0A5F5XMW3	FABP6	Fatty acid binding protein 6;FABP6;ortholog	GASTROTROPIN (PTHR11955:SF69)	transfer/carrier protein(PC00219)	Felis catus
ORNAN|Ensembl=ENSOANG00000007170|UniProtKB=F6XZ28	MVP	Major vault protein;MVP;ortholog	MAJOR VAULT PROTEIN (PTHR14165:SF3)	scaffold/adaptor protein(PC00226)	Ornithorhynchus anatinus
ANOCA|Ensembl=ENSACAG00000003382|UniProtKB=H9G7G6	PRDX2	Thioredoxin domain-containing protein;PRDX2;ortholog	PEROXIREDOXIN-1 (PTHR10681:SF111)	peroxidase(PC00180)	Anolis carolinensis
PRUPE|Gene=rps14|UniProtKB=E3W0J1	RPS14	30S ribosomal protein S14, chloroplastic;rps14;ortholog	28S RIBOSOMAL PROTEIN S14, MITOCHONDRIAL (PTHR19836:SF19)	ribosomal protein(PC00202)	Prunus persica
CHICK|Gene=ENO1|UniProtKB=P51913	ENO1	Alpha-enolase;ENO1;ortholog	ALPHA-ENOLASE (PTHR11902:SF12)	lyase(PC00144)	Gallus gallus
DICDI|dictyBase=DDB_G0272560|UniProtKB=P19198	CABP1	cAMP-binding protein 1;capA-2;ortholog	CAMP-BINDING PROTEIN 1-RELATED (PTHR32097:SF17)		Dictyostelium discoideum
RAT|RGD=3360|UniProtKB=P27657	PNLIP	Pancreatic triacylglycerol lipase;Pnlip;ortholog	PANCREATIC TRIACYLGLYCEROL LIPASE (PTHR11610:SF147)	lipase(PC00143)	Rattus norvegicus
ANOCA|Ensembl=ENSACAG00000014019|UniProtKB=G1KPF2	PDZK1	Uncharacterized protein;PDZK1;ortholog	NA(+)/H(+) EXCHANGE REGULATORY COFACTOR NHE-RF3-RELATED (PTHR14191:SF6)	scaffold/adaptor protein(PC00226)	Anolis carolinensis
FELCA|Ensembl=ENSFCAG00000022968|UniProtKB=M3WYR7	PARK7	Maillard deglycase;PARK7;ortholog	PARKINSON DISEASE PROTEIN 7 HOMOLOG (PTHR48094:SF12)		Felis catus
MACMU|Ensembl=ENSMMUG00000023072|UniProtKB=A0A5F7ZSU0	FABP6	Fatty acid binding protein 6;FABP6;ortholog	GASTROTROPIN (PTHR11955:SF69)	transfer/carrier protein(PC00219)	Macaca mulatta
DROME|FlyBase=FBgn0012036|UniProtKB=Q9VLC5	ALDH	Aldehyde dehydrogenase;Aldh;ortholog	ALDEHYDE DEHYDROGENASE (PTHR11699:SF302)	dehydrogenase(PC00092)	Drosophila melanogaster
YEAST|SGD=S000006392|UniProtKB=Q06580	MLC2	Myosin light chain 2;MLC2;ortholog	MYOSIN REGULATORY LIGHT CHAIN SQH (PTHR23049:SF34)	actin or actin-binding cytoskeletal protein(PC00041)	Saccharomyces cerevisiae
ORNAN|Ensembl=ENSOANG00000005080|UniProtKB=A0A6I8N977	NQO1	NAD(P)H quinone dehydrogenase 1;NQO1;ortholog	NAD(P)H DEHYDROGENASE [QUINONE] 1 (PTHR10204:SF1)	oxidoreductase(PC00176)	Ornithorhynchus anatinus
BOVIN|Gene=H1-0|UniProtKB=Q0IIJ2	H1-0	Histone H1.0;H1-0;ortholog	HISTONE H1.0 (PTHR11467:SF154)	chromatin/chromatin-binding, or -regulatory protein(PC00077)	Bos taurus
PANTR|Ensembl=ENSPTRG00000015484|UniProtKB=H2QNI7	PLS1	Plastin 1;PLS1;ortholog	PLASTIN-1 (PTHR19961:SF27)	non-motor actin binding protein(PC00165)	Pan troglodytes
ORYSJ|EnsemblGenome=Os01g0808400|UniProtKB=Q5VQQ5	CPK2	Calcium-dependent protein kinase 2;CPK2;ortholog	CALCIUM-DEPENDENT PROTEIN KINASE 17 (PTHR24349:SF353)	non-receptor serine/threonine protein kinase(PC00167)	Oryza sativa
HUMAN|HGNC=1491|UniProtKB=P47756	CAPZB	F-actin-capping protein subunit beta;CAPZB;ortholog	F-ACTIN-CAPPING PROTEIN SUBUNIT BETA (PTHR10619:SF0)	non-motor actin binding protein(PC00165)	Homo sapiens
ORYLA|Ensembl=ENSORLG00000025663|UniProtKB=A0A3B3HUK7	PAPLN	Uncharacterized protein;papln;ortholog	PAPILIN (PTHR13723:SF179)	metalloprotease(PC00153)	Oryzias latipes
DROME|FlyBase=FBgn0013672|UniProtKB=P00850	ATP6	ATP synthase subunit a;mt:ATPase6;ortholog	ATP SYNTHASE SUBUNIT A (PTHR11410:SF0)	ATP synthase(PC00002)	Drosophila melanogaster
ANOCA|Ensembl=ENSACAG00000023107|UniProtKB=H9GSH2	ARPC5	Actin-related protein 2/3 complex subunit 5;arpc5;ortholog	ACTIN-RELATED PROTEIN 2/3 COMPLEX SUBUNIT 5 (PTHR12644:SF1)	actin or actin-binding cytoskeletal protein(PC00041)	Anolis carolinensis
VIBCH|EnsemblGenome=VC_2770|UniProtKB=Q9KNG9	ATP6	ATP synthase subunit a;atpB;ortholog	ATP SYNTHASE SUBUNIT A, CHLOROPLASTIC (PTHR42823:SF3)	ATP synthase(PC00002)	Vibrio cholerae
PIG|Ensembl=ENSSSCG00000021408|UniProtKB=A0A5G2QNL3	TKT	Transketolase;TKT;ortholog	TRANSKETOLASE (PTHR43195:SF3)	transketolase(PC00221)	Sus scrofa
THAPS|EnsemblGenome=THAPSDRAFT_20726|UniProtKB=B8BQC2	MDH1	Malate dehydrogenase;MDH1;ortholog	MALATE DEHYDROGENASE, MITOCHONDRIAL (PTHR11540:SF16)	dehydrogenase(PC00092)	Thalassiosira pseudonana
MONDO|Ensembl=ENSMODG00000004492|UniProtKB=F6VQN3	SLIT1	Slit guidance ligand 1;SLIT1;ortholog	SLIT HOMOLOG 1 PROTEIN (PTHR45836:SF3)		Monodelphis domestica
MAIZE|Gene=H1_MAIZE|UniProtKB=P23444	H1	Histone H1;unassigned;ortholog	HISTONE H1 (PTHR11467:SF131)	chromatin/chromatin-binding, or -regulatory protein(PC00077)	Zea mays
METJA|EnsemblGenome=MJ_1346|UniProtKB=Q60182	glnA	Glutamine synthetase;glnA;ortholog	TYPE-1 GLUTAMINE SYNTHETASE 2 (PTHR43785:SF12)	ligase(PC00142)	Methanocaldococcus jannaschii
PIG|Ensembl=ENSSSCG00000014129|UniProtKB=F1RF07	ZCCHC9	Zinc finger CCHC-type containing 9;ZCCHC9;ortholog	ZINC FINGER CCHC DOMAIN-CONTAINING PROTEIN 9 (PTHR46242:SF1)		Sus scrofa
BOVIN|Ensembl=ENSBTAG00000003758|UniProtKB=A7Z014	TKT	TKT protein;TKT;ortholog	TRANSKETOLASE (PTHR43195:SF3)	transketolase(PC00221)	Bos taurus
PIG|Ensembl=ENSSSCG00000004166|UniProtKB=A0A287BPM4	AHI1	Uncharacterized protein;AHI1;ortholog	JOUBERIN (PTHR44499:SF1)		Sus scrofa
CHICK|Ensembl=ENSGALG00000015603|UniProtKB=E1BZR6	ZCCHC9	Uncharacterized protein;ZCCHC9;ortholog	ZINC FINGER CCHC DOMAIN-CONTAINING PROTEIN 9 (PTHR46242:SF1)		Gallus gallus
ORYLA|Ensembl=ENSORLG00000007547|UniProtKB=H2LTP3	Svep1	Uncharacterized protein;svep1;ortholog	SUSHI, VON WILLEBRAND FACTOR TYPE A, EGF AND PENTRAXIN DOMAIN-CONTAINING PROTEIN 1 (PTHR19325:SF43)	complement component(PC00078)	Oryzias latipes
HUMAN|HGNC=11058|UniProtKB=Q9NS82	ASC1	Asc-type amino acid transporter 1;SLC7A10;ortholog	ASC-TYPE AMINO ACID TRANSPORTER 1 (PTHR11785:SF73)	transporter(PC00227)	Homo sapiens
CHLAA|EnsemblGenome=Caur_3021|UniProtKB=A9WGQ4	Ahcy	Adenosylhomocysteinase;ahcY;ortholog	ADENOSYLHOMOCYSTEINASE (PTHR23420:SF0)	hydrolase(PC00121)	Chloroflexus aurantiacus
ORYLA|Ensembl=ENSORLG00000012901|UniProtKB=H2MC83	RPS14	Uncharacterized protein;rps14;ortholog	RIBOSOMAL PROTEIN S14 (PTHR11759:SF1)	ribosomal protein(PC00202)	Oryzias latipes
SACS2|EnsemblGenome=SSO2989|UniProtKB=Q97UL5	DMD	Diphosphomevalonate decarboxylase;SSO2989;ortholog	DIPHOSPHOMEVALONATE DECARBOXYLASE (PTHR10977:SF3)	decarboxylase(PC00089)	Sulfolobus solfataricus
CHICK|Ensembl=ENSGALG00000027501|UniProtKB=O57579	ANPEP	Aminopeptidase Ey;ANPEP;ortholog	AMINOPEPTIDASE N (PTHR11533:SF172)	metalloprotease(PC00153)	Gallus gallus
HORSE|Ensembl=ENSECAG00000024756|UniProtKB=F6SII7	DSEL	Dermatan sulfate epimerase like;DSEL;ortholog	DERMATAN-SULFATE EPIMERASE-LIKE PROTEIN (PTHR15532:SF2)		Equus caballus
ORNAN|Ensembl=ENSOANG00000011440|UniProtKB=A0A6I8MXS1	CALU	Calumenin;CALU;ortholog	CALUMENIN (PTHR10827:SF76)	calmodulin-related(PC00061)	Ornithorhynchus anatinus
CHICK|Ensembl=ENSGALG00000039354|UniProtKB=A0A1D5NUW2	VTG1	Phosvitin;VTG1;ortholog	PHOSVITIN-RELATED (PTHR23345:SF15)	storage protein(PC00210)	Gallus gallus
YEAST|SGD=S000002634|UniProtKB=P07170	ADK1	Adenylate kinase;ADK1;ortholog	ADENYLATE KINASE 2, MITOCHONDRIAL (PTHR23359:SF234)	nucleotide kinase(PC00172)	Saccharomyces cerevisiae
DICDI|dictyBase=DDB_G0292898|UniProtKB=Q54CJ3	PGLS	Probable 6-phosphogluconolactonase;pgl;ortholog	6-PHOSPHOGLUCONOLACTONASE (PTHR11054:SF0)	hydrolase(PC00121)	Dictyostelium discoideum
ANOCA|Ensembl=ENSACAG00000015148|UniProtKB=G1KQR0	TAGLN3	Transgelin;TAGLN3;ortholog	TRANSGELIN-3 (PTHR47385:SF10)		Anolis carolinensis
PIG|Ensembl=ENSSSCG00000032408|UniProtKB=A0A287AGZ2	CASP7	Caspase 7;CASP7;ortholog	CASPASE-7 (PTHR10454:SF31)	protease(PC00190)	Sus scrofa
BOVIN|Ensembl=ENSBTAG00000012558|UniProtKB=F1MXQ0	ADAMTS12	ADAM metallopeptidase with thrombospondin type 1 motif 12;ADAMTS12;ortholog	A DISINTEGRIN AND METALLOPROTEINASE WITH THROMBOSPONDIN MOTIFS 12 (PTHR13723:SF189)	metalloprotease(PC00153)	Bos taurus
XENTR|Ensembl=ENSXETG00000013304|UniProtKB=A0A6I8SP15	ALDH6A1	Aldehyde dehydrogenase 6 family member A1;aldh6a1;ortholog	METHYLMALONATE-SEMIALDEHYDE DEHYDROGENASE [ACYLATING], MITOCHONDRIAL (PTHR43866:SF3)	dehydrogenase(PC00092)	Xenopus tropicalis
DICDI|dictyBase=DDB_G0272618|UniProtKB=Q556J0	TKT	Transketolase;tkt-2;ortholog	TRANSKETOLASE (PTHR43522:SF10)	transketolase(PC00221)	Dictyostelium discoideum
MACMU|Ensembl=ENSMMUG00000009616|UniProtKB=F6ZZ73	CALU	Calumenin;CALU;ortholog	CALUMENIN (PTHR10827:SF88)	calmodulin-related(PC00061)	Macaca mulatta
GORGO|Ensembl=ENSGGOG00000016275|UniProtKB=G3RJI7	DCT	Dopachrome tautomerase;DCT;ortholog	L-DOPACHROME TAUTOMERASE (PTHR11474:SF4)	oxygenase(PC00177)	Gorilla gorilla gorilla
ORNAN|Ensembl=ENSOANG00000011016|UniProtKB=F7D6Q6	FLNA	Filamin A;FLNA;ortholog	FILAMIN-A (PTHR38537:SF5)		Ornithorhynchus anatinus
METAC|EnsemblGenome=MA_1086|UniProtKB=Q8TRT3	RPS14	30S ribosomal protein S14 type Z;rps14;ortholog	40S RIBOSOMAL PROTEIN S29 (PTHR12010:SF2)	ribosomal protein(PC00202)	Methanosarcina acetivorans
CHICK|Ensembl=ENSGALG00000014692|UniProtKB=F1NAM2	LMNB1	Lamin-B1;LMNB1;ortholog	LAMIN-B1 (PTHR45721:SF3)		Gallus gallus
RAT|RGD=69367|UniProtKB=A0A0G2JWD0	PROM1	Prominin 1;Prom1;ortholog	PROMININ-1 (PTHR22730:SF3)		Rattus norvegicus
PANTR|Ensembl=ENSPTRG00000006531|UniProtKB=K7AKS9	ALDH6A1	Aldehyde dehydrogenase 6 family member A1;ALDH6A1;ortholog	METHYLMALONATE-SEMIALDEHYDE DEHYDROGENASE [ACYLATING], MITOCHONDRIAL (PTHR43866:SF3)	dehydrogenase(PC00092)	Pan troglodytes
PANTR|Ensembl=ENSPTRG00000045199|UniProtKB=A0A2I3TF00	KCP	Kielin cysteine rich BMP regulator;KCP;ortholog	KIELIN/CHORDIN-LIKE PROTEIN (PTHR46698:SF2)		Pan troglodytes
ORNAN|Ensembl=ENSOANG00000007408|UniProtKB=F7CIG5	CTTN	Cortactin;CTTN;ortholog	SRC SUBSTRATE CORTACTIN (PTHR10829:SF15)	non-motor actin binding protein(PC00165)	Ornithorhynchus anatinus
FELCA|Ensembl=ENSFCAG00000036705|UniProtKB=A0A2I2U4B5	NME2	Nucleoside diphosphate kinase;NME2;ortholog	NUCLEOSIDE DIPHOSPHATE KINASE B (PTHR11349:SF57)	kinase(PC00137)	Felis catus
METJA|EnsemblGenome=MJ_0470|UniProtKB=P54041	RPS8	30S ribosomal protein S8;rps8;ortholog	40S RIBOSOMAL PROTEIN S15A (PTHR11758:SF16)	ribosomal protein(PC00202)	Methanocaldococcus jannaschii
POPTR|Gene_ORFName=POPTRDRAFT_907513|UniProtKB=B9IIR4	CASP3	Casparian strip membrane protein 3;POPTRDRAFT_907513;ortholog	CASPARIAN STRIP MEMBRANE PROTEIN 2-RELATED (PTHR11615:SF116)	dehydrogenase(PC00092)	Populus trichocarpa
ORYLA|Ensembl=ENSORLG00000023049|UniProtKB=A0A3B3II86	MALRD1	Uncharacterized protein;malrd1;ortholog	MAM AND LDL-RECEPTOR CLASS A DOMAIN-CONTAINING PROTEIN 1 (PTHR23282:SF140)		Oryzias latipes
PIG|Ensembl=ENSSSCG00000011680|UniProtKB=A0A287BI79	PLS1	Plastin 1;PLS1;ortholog	PLASTIN-1 (PTHR19961:SF27)	non-motor actin binding protein(PC00165)	Sus scrofa
ARATH|Gene_OrderedLocusName=AtCg00330|UniProtKB=P56804	RPS14	30S ribosomal protein S14, chloroplastic;rps14;ortholog	28S RIBOSOMAL PROTEIN S14, MITOCHONDRIAL (PTHR19836:SF19)	ribosomal protein(PC00202)	Arabidopsis thaliana
MACMU|Gene=CA1|UniProtKB=P00916	CA1	Carbonic anhydrase 1;CA1;ortholog	CARBONIC ANHYDRASE 1 (PTHR18952:SF266)	dehydratase(PC00091)	Macaca mulatta
ORYLA|Ensembl=ENSORLG00000004121|UniProtKB=H2LGR4	SSPO	Uncharacterized protein;sspo;ortholog	SCO-SPONDIN (PTHR11339:SF396)	extracellular matrix protein(PC00102)	Oryzias latipes
YEAST|SGD=S000000313|UniProtKB=P06787	CALM	Calmodulin;CMD1;ortholog	CALMODULIN (PTHR23050:SF523)	calmodulin-related(PC00061)	Saccharomyces cerevisiae
CANLF|Ensembl=ENSCAFG00000032226|UniProtKB=A0A5F4CPW0	YWHAE	14_3_3 domain-containing protein;YWHAE;ortholog	14-3-3 PROTEIN EPSILON (PTHR18860:SF151)	scaffold/adaptor protein(PC00226)	Canis lupus familiaris
DANRE|ZFIN=ZDB-GENE-041010-5|UniProtKB=Q5XJ36	PARK7	Parkinson disease protein 7 homolog;park7;ortholog	PARKINSON DISEASE PROTEIN 7 HOMOLOG (PTHR48094:SF12)		Danio rerio
LEPOC|Ensembl=ENSLOCG00000010164|UniProtKB=W5MVY1	DMD	Dystrophin;DMD;ortholog	DYSTROPHIN (PTHR12268:SF25)	ubiquitin-protein ligase(PC00234)	lepisosteus oculatus
MYCGE|EnsemblGenome=MG_111|UniProtKB=P47357	GPI	Glucose-6-phosphate isomerase;pgi;ortholog	GLUCOSE-6-PHOSPHATE ISOMERASE (PTHR11469:SF1)	isomerase(PC00135)	mycoplasma genitalium
BOVIN|Ensembl=ENSBTAG00000001179|UniProtKB=E1BB53	TEP1	Telomerase associated protein 1;TEP1;ortholog	TELOMERASE PROTEIN COMPONENT 1 (PTHR44791:SF1)	DNA metabolism protein(PC00009)	Bos taurus
SHEON|Gene_OrderedLocusName=SO_0930|UniProtKB=Q8EIB3	TKT	Transketolase;tkt;ortholog	TRANSKETOLASE 1-RELATED (PTHR43522:SF2)	transketolase(PC00221)	Shewanella oneidensis
CANLF|Ensembl=ENSCAFG00000012743|UniProtKB=F1Q2A2	OAT	Ornithine--oxo-acid aminotransferase;OAT;ortholog	ORNITHINE AMINOTRANSFERASE, MITOCHONDRIAL (PTHR11986:SF18)	transaminase(PC00216)	Canis lupus familiaris
ECOLI|EnsemblGenome=BAE78027|UniProtKB=P0A6T1	GPI	Glucose-6-phosphate isomerase;pgi;ortholog	GLUCOSE-6-PHOSPHATE ISOMERASE (PTHR11469:SF1)	isomerase(PC00135)	Escherichia coli
SCHPO|PomBase=SPBC21C3.08c|UniProtKB=Q9P7L5	OAT	Ornithine aminotransferase car2;car2;ortholog	ORNITHINE AMINOTRANSFERASE, MITOCHONDRIAL (PTHR11986:SF18)	transaminase(PC00216)	Schizosaccharomyces pombe
THAPS|Gene=rpl12|UniProtKB=A0T0Q7	RPL12	50S ribosomal protein L12, chloroplastic;rpl12;ortholog	39S RIBOSOMAL PROTEIN L12, MITOCHONDRIAL (PTHR45987:SF4)	ribosomal protein(PC00202)	Thalassiosira pseudonana
PANTR|Ensembl=ENSPTRG00000001836|UniProtKB=H2Q0W1	CSRP1	Cysteine and glycine-rich protein 1;CSRP1;ortholog	CYSTEINE AND GLYCINE-RICH PROTEIN 1 (PTHR24215:SF23)	actin or actin-binding cytoskeletal protein(PC00041)	Pan troglodytes
ORNAN|Ensembl=ENSOANG00000037571|UniProtKB=A0A6I8PII7	PIN1	Peptidyl-prolyl cis-trans isomerase;PIN1;ortholog	PEPTIDYL-PROLYL CIS-TRANS ISOMERASE-RELATED (PTHR10657:SF4)	chaperone(PC00072)	Ornithorhynchus anatinus
CHLRE|EnsemblGenome=CHLRE_02g088200v5|UniProtKB=O48949	PDI	Protein disulfide-isomerase;PDI;ortholog	PROTEIN DISULFIDE ISOMERASE-LIKE 1-4 (PTHR18929:SF246)	chaperone(PC00072)	Chlamydomonas reinhardtii
PANTR|Gene=MPI|UniProtKB=A5A6K3	MPI	Mannose-6-phosphate isomerase;MPI;ortholog	MANNOSE-6-PHOSPHATE ISOMERASE (PTHR10309:SF0)	isomerase(PC00135)	Pan troglodytes
ORNAN|Ensembl=ENSOANG00000005586|UniProtKB=A0A6I8PT07	NCAM2	Neural cell adhesion molecule 2;NCAM2;ortholog	MICROFIBRILLAR-ASSOCIATED PROTEIN 3-LIKE-RELATED (PTHR12231:SF231)	immunoglobulin superfamily cell adhesion molecule(PC00125)	Ornithorhynchus anatinus
MONDO|Ensembl=ENSMODG00000006641|UniProtKB=F7G4A4	Prkcsh	Glucosidase 2 subunit beta;PRKCSH;ortholog	GLUCOSIDASE 2 SUBUNIT BETA (PTHR12630:SF1)	protein-binding activity modulator(PC00095)	Monodelphis domestica
DICDI|dictyBase=DDB_G0283767|UniProtKB=Q9NHF6	DCT	Dynacortin;dct;ortholog			Dictyostelium discoideum
GORGO|Ensembl=ENSGGOG00000025593|UniProtKB=G3RSQ9	Fscn1	Fascin;FSCN1;ortholog	FASCIN (PTHR10551:SF23)	non-motor actin binding protein(PC00165)	Gorilla gorilla gorilla
SHEON|Gene_OrderedLocusName=SO_3509|UniProtKB=Q8CVD2	HEXB	Beta-N-acetylhexosaminidase;hexB;ortholog	N-ACETYL-BETA-GLUCOSAMINIDASE (PTHR22600:SF52)	glycosidase(PC00110)	Shewanella oneidensis
ORYSJ|EnsemblGenome=Os02g0578366|UniProtKB=Q6EP58	CASP7	Casparian strip membrane protein 7;Os02g0578366;ortholog	CASPARIAN STRIP MEMBRANE PROTEIN 5 (PTHR11615:SF329)	dehydrogenase(PC00092)	Oryza sativa
PIG|Ensembl=ENSSSCG00000002535|UniProtKB=A0A287AQK7	HSP90AA1	Heat shock protein HSP 90-alpha;HSP90AA1;ortholog	HEAT SHOCK PROTEIN HSP 90-ALPHA (PTHR11528:SF87)	Hsp90 family chaperone(PC00028)	Sus scrofa
DROME|FlyBase=FBgn0286818|UniProtKB=P54399	PDI	Protein disulfide-isomerase;Pdi;ortholog	PROTEIN DISULFIDE-ISOMERASE (PTHR18929:SF240)	chaperone(PC00072)	Drosophila melanogaster
PIG|Ensembl=ENSSSCG00000034012|UniProtKB=A0A287AZZ1	CASP3	Caspase-3;CASP3;ortholog	CASPASE-3 (PTHR10454:SF198)	protease(PC00190)	Sus scrofa
CANLF|Ensembl=ENSCAFG00000029227|UniProtKB=A0A5F4CB53	CSRP1	Cysteine and glycine rich protein 1;CSRP1;ortholog	CYSTEINE AND GLYCINE-RICH PROTEIN 1 (PTHR24215:SF23)	actin or actin-binding cytoskeletal protein(PC00041)	Canis lupus familiaris
BOVIN|Ensembl=ENSBTAG00000017958|UniProtKB=A0A3Q1MGZ5	AHI1	Abelson helper integration site 1;AHI1;ortholog	JOUBERIN (PTHR44499:SF1)		Bos taurus
MONDO|Ensembl=ENSMODG00000005926|UniProtKB=F6WWS7	TYMP	Thymidine phosphorylase;TYMP;ortholog	THYMIDINE PHOSPHORYLASE (PTHR10515:SF0)	glycosyltransferase(PC00111)	Monodelphis domestica
EMENI|EnsemblGenome=AN4501.2|UniProtKB=Q5B4M9	artA	ARTA;ANIA_04501;ortholog	PROTEIN BMH1-RELATED (PTHR18860:SF140)	scaffold/adaptor protein(PC00226)	Emericella nidulans
MOUSE|MGI=MGI=96298|UniProtKB=Q91ZJ9	Hyal1	Hyaluronidase-1;Hyal1;ortholog	HYALURONIDASE-1 (PTHR11769:SF23)	glycosidase(PC00110)	Mus musculus
HALSA|EnsemblGenome=VNG_2251G|UniProtKB=Q9HN50	Ahcy	Adenosylhomocysteinase;ahcY;ortholog	ADENOSYLHOMOCYSTEINASE (PTHR23420:SF0)	hydrolase(PC00121)	Halobacterium salinarum
MEDTR|EnsemblGenome=MTR_7g085800|UniProtKB=A2Q5W0	Atub	Tubulin alpha chain;aTUB;ortholog	TUBULIN ALPHA CHAIN (PTHR11588:SF438)	tubulin(PC00228)	Medicago truncatula
FELCA|Ensembl=ENSFCAG00000008985|UniProtKB=A0A5F5XFR8	DPYS	Dihydropyrimidinase;DPYS;ortholog	DIHYDROPYRIMIDINASE (PTHR11647:SF50)	hydrolase(PC00121)	Felis catus
RAT|RGD=1307195|UniProtKB=D3ZUV2	MIB1	RING-type E3 ubiquitin transferase;Mib1;ortholog	E3 UBIQUITIN-PROTEIN LIGASE MIB1 (PTHR24202:SF53)	ubiquitin-protein ligase(PC00234)	Rattus norvegicus
GORGO|Ensembl=ENSGGOG00000000724|UniProtKB=G3QEL7	COL4A4	Collagen type IV alpha 4 chain;COL4A4;ortholog	COLLAGEN ALPHA-4(IV) CHAIN (PTHR24023:SF714)	extracellular matrix structural protein(PC00103)	Gorilla gorilla gorilla
CHICK|Ensembl=ENSGALG00000008043|UniProtKB=A0A3Q3AYV8	CORO2B	Coronin;CORO2B;ortholog	CORONIN-2B (PTHR10856:SF17)	non-motor actin binding protein(PC00165)	Gallus gallus
MACMU|Ensembl=ENSMMUG00000020772|UniProtKB=A0A1D5RL74	CSRP1	Cysteine and glycine rich protein 1;CSRP1;ortholog	CYSTEINE AND GLYCINE-RICH PROTEIN 1 (PTHR24215:SF23)	actin or actin-binding cytoskeletal protein(PC00041)	Macaca mulatta
HELPY|EnsemblGenome=HP_0194|UniProtKB=P56076	TPI	Triosephosphate isomerase;tpiA;ortholog	TRIOSEPHOSPHATE ISOMERASE (PTHR21139:SF2)	isomerase(PC00135)	Helicobacter pylori
ORNAN|Ensembl=ENSOANG00000022684|UniProtKB=A0A6I8PQ69	GFPT1	Glutamine--fructose-6-phosphate transaminase (isomerizing);GFPT1;ortholog	GLUTAMINE--FRUCTOSE-6-PHOSPHATE AMINOTRANSFERASE [ISOMERIZING] 1 (PTHR10937:SF12)	transaminase(PC00216)	Ornithorhynchus anatinus
PANTR|Ensembl=ENSPTRG00000018588|UniProtKB=K7D0T5	LAMA2	Laminin subunit alpha 2;LAMA2;ortholog	LAMININ SUBUNIT ALPHA-2 (PTHR10574:SF291)	extracellular matrix protein(PC00102)	Pan troglodytes
DICDI|dictyBase=DDB_G0291864|UniProtKB=Q54E24	RPS8	40S ribosomal protein S8;rps8;ortholog	40S RIBOSOMAL PROTEIN S8 (PTHR10394:SF3)	ribosomal protein(PC00202)	Dictyostelium discoideum
DICDI|dictyBase=DDB_G0269196|UniProtKB=P32256	TUBB	Tubulin beta chain;tubB;ortholog	TUBULIN BETA-1 CHAIN-RELATED (PTHR11588:SF429)	tubulin(PC00228)	Dictyostelium discoideum
MONDO|Ensembl=ENSMODG00000002707|UniProtKB=F7CXV7	NQO1	Flavodoxin_2 domain-containing protein;NQO1;ortholog	NAD(P)H DEHYDROGENASE [QUINONE] 1 (PTHR10204:SF1)	oxidoreductase(PC00176)	Monodelphis domestica
MOUSE|MGI=MGI=1354175|UniProtKB=Q9JMH6	TXNRD1	Thioredoxin reductase 1, cytoplasmic;Txnrd1;ortholog	THIOREDOXIN REDUCTASE 1, CYTOPLASMIC (PTHR48105:SF7)	reductase(PC00198)	Mus musculus
HORSE|Ensembl=ENSECAG00000011068|UniProtKB=F7AJP3	CHIT1	Chitinase;CHIT1;ortholog	CHITOTRIOSIDASE-1 (PTHR11177:SF248)	glycosidase(PC00110)	Equus caballus
ANOCA|Ensembl=ENSACAG00000013721|UniProtKB=H9GK93	CORO2B	Coronin;CORO2B;ortholog	CORONIN-2B (PTHR10856:SF17)	non-motor actin binding protein(PC00165)	Anolis carolinensis
RICCO|Gene_ORFName=RCOM_ORF00035|UniProtKB=G1D756	RPS14	30S ribosomal protein S14, chloroplastic;rps14;ortholog	28S RIBOSOMAL PROTEIN S14, MITOCHONDRIAL (PTHR19836:SF19)	ribosomal protein(PC00202)	Ricinus communis
CANLF|Ensembl=ENSCAFG00000006474|UniProtKB=J9P0U7	PGGHG	Protein-glucosylgalactosylhydroxylysine glucosidase;PGGHG;ortholog	PROTEIN-GLUCOSYLGALACTOSYLHYDROXYLYSINE GLUCOSIDASE (PTHR11051:SF8)	glycosidase(PC00110)	Canis lupus familiaris
PIG|Ensembl=ENSSSCG00000024061|UniProtKB=A0A286ZI93	TNNI1	Troponin I1, slow skeletal type;TNNI1;ortholog	TROPONIN I, SLOW SKELETAL MUSCLE (PTHR13738:SF9)	non-motor actin binding protein(PC00165)	Sus scrofa
PIG|Ensembl=ENSSSCG00000031769|UniProtKB=A0A5G2QWJ7	CTTN	Cortactin;CTTN;ortholog	SRC SUBSTRATE CORTACTIN (PTHR10829:SF15)	non-motor actin binding protein(PC00165)	Sus scrofa
CANLF|Ensembl=ENSCAFG00000010274|UniProtKB=A0A5F4CYU5	CHI3L1	Chitinase-3-like protein 1;CHI3L1;ortholog	CHITINASE-3-LIKE PROTEIN 1 (PTHR11177:SF202)	glycosidase(PC00110)	Canis lupus familiaris
ANOCA|Ensembl=ENSACAG00000002978|UniProtKB=G1KBE1	Rps3a	40S ribosomal protein S3a;RPS3A;ortholog	40S RIBOSOMAL PROTEIN S3A (PTHR11830:SF0)	ribosomal protein(PC00202)	Anolis carolinensis
BOVIN|Gene=HYAL1|UniProtKB=Q5E985	Hyal1	Hyaluronidase-1;HYAL1;ortholog	HYALURONIDASE-1 (PTHR11769:SF23)	glycosidase(PC00110)	Bos taurus
FELCA|Ensembl=ENSFCAG00000009133|UniProtKB=M3WAV4	ALDH1A1	Aldehyde dehydrogenase 1 family member A1;ALDH1A1;ortholog	RETINAL DEHYDROGENASE 1 (PTHR11699:SF140)	dehydrogenase(PC00092)	Felis catus
CHICK|Ensembl=ENSGALG00000042505|UniProtKB=A0A1D5PUS3	DSEL	Uncharacterized protein;DSEL;ortholog	DERMATAN-SULFATE EPIMERASE-LIKE PROTEIN (PTHR15532:SF2)		Gallus gallus
ASHGO|EnsemblGenome=AGOS_AGL321W|UniProtKB=Q751L8	SOD1	Superoxide dismutase [Cu-Zn];SOD1;ortholog	SUPEROXIDE DISMUTASE [CU-ZN] (PTHR10003:SF71)	oxidoreductase(PC00176)	Ashbya gossypii
BOVIN|Ensembl=ENSBTAG00000020938|UniProtKB=A0A3Q1NES9	Twf1	Twinfilin-1;TWF1;ortholog	TWINFILIN-1 (PTHR13759:SF8)	non-motor actin binding protein(PC00165)	Bos taurus
EMENI|EnsemblGenome=AN2126.2|UniProtKB=Q5BBF4	CAPZA	F-actin-capping protein subunit alpha;cap1;ortholog	F-ACTIN-CAPPING PROTEIN SUBUNIT ALPHA (PTHR10653:SF0)	non-motor actin binding protein(PC00165)	Emericella nidulans
ORNAN|Ensembl=ENSOANG00000006920|UniProtKB=F7EI79	RCHY1	Ring finger and CHY zinc finger domain containing 1;RCHY1;ortholog	RING FINGER AND CHY ZINC FINGER DOMAIN-CONTAINING PROTEIN 1 (PTHR21319:SF53)	ubiquitin-protein ligase(PC00234)	Ornithorhynchus anatinus
NELNU|Gene_ORFName=CR59_P019|UniProtKB=D3WC98	RPS14	30S ribosomal protein S14, chloroplastic;rps14;ortholog	28S RIBOSOMAL PROTEIN S14, MITOCHONDRIAL (PTHR19836:SF19)	ribosomal protein(PC00202)	Nelumbo nucifera
MONDO|Ensembl=ENSMODG00000001823|UniProtKB=F6T5G5	ARPP19	Uncharacterized protein;ARPP19;ortholog	CAMP-REGULATED PHOSPHOPROTEIN 19 (PTHR10358:SF4)		Monodelphis domestica
CANLF|Ensembl=ENSCAFG00000006188|UniProtKB=J9NRV9	ADGRA2	Adhesion G protein-coupled receptor A2;ADGRA2;ortholog	ADHESION G PROTEIN-COUPLED RECEPTOR A2 (PTHR45930:SF1)	G-protein coupled receptor(PC00021)	Canis lupus familiaris
PIG|Gene=TGFBI|UniProtKB=O11780	TGFBI	Transforming growth factor-beta-induced protein ig-h3;TGFBI;ortholog	TRANSFORMING GROWTH FACTOR-BETA-INDUCED PROTEIN IG-H3 (PTHR10900:SF82)	cell adhesion molecule(PC00069)	Sus scrofa
DANRE|Ensembl=ENSDARG00000091618|UniProtKB=E7FBE5	CLTCL1	Clathrin heavy chain;cltcl1;ortholog	CLATHRIN HEAVY CHAIN 2 (PTHR10292:SF6)	vesicle coat protein(PC00235)	Danio rerio
MOUSE|MGI=MGI=97356|UniProtKB=Q01768	NME2	Nucleoside diphosphate kinase B;Nme2;ortholog	NUCLEOSIDE DIPHOSPHATE KINASE B (PTHR11349:SF57)	kinase(PC00137)	Mus musculus
SORBI|Gene=rps8|UniProtKB=A1E9W0	RPS8	30S ribosomal protein S8, chloroplastic;rps8;ortholog	37S RIBOSOMAL PROTEIN S8, MITOCHONDRIAL (PTHR11758:SF4)	ribosomal protein(PC00202)	Sorghum bicolor
PIG|Ensembl=ENSSSCG00000002888|UniProtKB=F1RM74	GAPDHS	Glyceraldehyde-3-phosphate dehydrogenase;GAPDHS;ortholog	GLYCERALDEHYDE-3-PHOSPHATE DEHYDROGENASE, TESTIS-SPECIFIC (PTHR10836:SF79)	dehydrogenase(PC00092)	Sus scrofa
CANLF|Ensembl=ENSCAFG00000013117|UniProtKB=A0A5F4D459	UAP1	UDP-N-acetylglucosamine pyrophosphorylase 1;UAP1;ortholog	UDP-N-ACETYLHEXOSAMINE PYROPHOSPHORYLASE (PTHR11952:SF4)		Canis lupus familiaris
PANTR|Ensembl=ENSPTRG00000010114|UniProtKB=G2HGZ3	CNDP2	CNDP dipeptidase 2 (Metallopeptidase M20 family);CNDP2;ortholog	CYTOSOLIC NON-SPECIFIC DIPEPTIDASE (PTHR43270:SF11)	metalloprotease(PC00153)	Pan troglodytes
MACMU|Ensembl=ENSMMUG00000002043|UniProtKB=A0A5F8A8W3	CD81	Tetraspanin;CD81;ortholog	CD81 ANTIGEN (PTHR19282:SF214)	scaffold/adaptor protein(PC00226)	Macaca mulatta
PANTR|Gene=TKT|UniProtKB=Q5R1W6	TKT	Transketolase;TKT;ortholog	TRANSKETOLASE (PTHR43195:SF3)	transketolase(PC00221)	Pan troglodytes
PIG|Ensembl=ENSSSCG00000007278|UniProtKB=A0A5G2R5W8	Ahcy	Adenosylhomocysteinase;AHCY;ortholog	ADENOSYLHOMOCYSTEINASE (PTHR23420:SF0)	hydrolase(PC00121)	Sus scrofa
MACMU|Ensembl=ENSMMUG00000022965|UniProtKB=F6U6B5	Rpsa	40S ribosomal protein SA;RPSA;ortholog	40S RIBOSOMAL PROTEIN SA (PTHR11489:SF9)	ribosomal protein(PC00202)	Macaca mulatta
PIG|Gene=RPS14|UniProtKB=Q29303	RPS14	40S ribosomal protein S14 (Fragment);RPS14;ortholog			Sus scrofa
MONDO|Ensembl=ENSMODG00000020961|UniProtKB=F6SNU6	TMPRSS2	Transmembrane serine protease 2;TMPRSS2;ortholog	TRANSMEMBRANE PROTEASE SERINE 2 (PTHR24253:SF89)	serine protease(PC00203)	Monodelphis domestica
RAT|RGD=619996|UniProtKB=Q9JKC1	Bche	Carboxylic ester hydrolase;Bche;ortholog	CHOLINESTERASE (PTHR43918:SF5)	esterase(PC00097)	Rattus norvegicus
MOUSE|MGI=MGI=1919657|UniProtKB=B1AS42	CYB5RL	NADH-cytochrome b5 reductase-like;Cyb5rl;ortholog	NADH-CYTOCHROME B5 REDUCTASE-LIKE (PTHR19370:SF184)	reductase(PC00198)	Mus musculus
THEYD|EnsemblGenome=THEYE_A0247|UniProtKB=B5YI30	Pgk	Phosphoglycerate kinase;pgk;ortholog	PHOSPHOGLYCERATE KINASE 1, CHLOROPLASTIC-RELATED (PTHR11406:SF23)	carbohydrate kinase(PC00065)	Thermodesulfovibrio yellowstonii
MONDO|Ensembl=ENSMODG00000010848|UniProtKB=A0A5F8GGC3	ADGRA2	Adhesion G protein-coupled receptor A2;ADGRA2;ortholog	ADHESION G PROTEIN-COUPLED RECEPTOR A2 (PTHR45930:SF1)	G-protein coupled receptor(PC00021)	Monodelphis domestica
BOVIN|Ensembl=ENSBTAG00000003449|UniProtKB=G3MZ24	KCP	Kielin cysteine rich BMP regulator;KCP;ortholog	KIELIN/CHORDIN-LIKE PROTEIN (PTHR46698:SF2)		Bos taurus
FELCA|Gene=CASP3|UniProtKB=Q8MJU1	CASP3	Caspase-3;CASP3;ortholog	CASPASE-3 (PTHR10454:SF198)	protease(PC00190)	Felis catus
MONDO|Ensembl=ENSMODG00000021238|UniProtKB=F6TZV1	PLS1	Plastin 1;PLS1;ortholog	PLASTIN-1 (PTHR19961:SF27)	non-motor actin binding protein(PC00165)	Monodelphis domestica
ORNAN|Ensembl=ENSOANG00000037717|UniProtKB=A0A6I8PIX1	CDA	Cytidine deaminase;CDA;ortholog	CYTIDINE DEAMINASE (PTHR11644:SF2)	deaminase(PC00088)	Ornithorhynchus anatinus
PIG|Ensembl=ENSSSCG00000036135|UniProtKB=A0A5G2QQE9	COL1A1	Collagen type I alpha 1 chain;COL1A1;ortholog	COLLAGEN ALPHA-1(I) CHAIN (PTHR24023:SF569)	extracellular matrix structural protein(PC00103)	Sus scrofa
CANLF|Ensembl=ENSCAFG00000001433|UniProtKB=F1PHS5	Plec	Plectin;PLEC;ortholog	PLECTIN (PTHR23169:SF20)	intermediate filament binding protein(PC00130)	Canis lupus familiaris
HORSE|Ensembl=ENSECAG00000039211|UniProtKB=A0A3Q2LBE4	IGFALS	Insulin like growth factor binding protein acid labile subunit;IGFALS;ortholog	INSULIN LIKE GROWTH FACTOR BINDING PROTEIN ACID LABILE SUBUNIT (PTHR24369:SF201)	cell adhesion molecule(PC00069)	Equus caballus
LEPIN|EnsemblGenome=LA_1313|UniProtKB=Q8F6J3	glnA	Glutamine synthetase;glnA;ortholog	LENGSIN (PTHR43407:SF1)	ligase(PC00142)	Leptospira interrogans
RAT|RGD=1359180|UniProtKB=Q5XIE4	RCHY1	Ring finger and CHY zinc finger domain containing 1, isoform CRA_b;Rchy1;ortholog	RING FINGER AND CHY ZINC FINGER DOMAIN-CONTAINING PROTEIN 1 (PTHR21319:SF53)	ubiquitin-protein ligase(PC00234)	Rattus norvegicus
HELAN|EnsemblGenome=HannXRQ_Chr07g0198021|UniProtKB=A0A251UCN6	AK	Aspartokinase;AK;ortholog	ASPARTOKINASE (PTHR21499:SF64)	amino acid kinase(PC00045)	Helianthus annuus
RAT|RGD=3288|UniProtKB=P20717	PDI	Protein-arginine deiminase type-2;Padi2;ortholog	PROTEIN-ARGININE DEIMINASE TYPE-2 (PTHR10837:SF12)	chromatin/chromatin-binding, or -regulatory protein(PC00077)	Rattus norvegicus
XANCP|EnsemblGenome=XCC1418|UniProtKB=Q8PAR0	GST	Glutathione S-transferase;gst;ortholog	GLUTATHIONE S-TRANSFERASE GSTA (PTHR44051:SF10)	transferase(PC00220)	Xanthomonas campestris
CHICK|Gene=VTG1|UniProtKB=P87498	VTG1	Vitellogenin-1;VTG1;ortholog	PHOSVITIN-RELATED (PTHR23345:SF15)	storage protein(PC00210)	Gallus gallus
RAT|Ensembl=ENSRNOG00000009148|UniProtKB=D3ZZ05	CYB5RL	Cytochrome-b5 reductase;Cyb5rl;ortholog	NADH-CYTOCHROME B5 REDUCTASE-LIKE (PTHR19370:SF184)	reductase(PC00198)	Rattus norvegicus
PANTR|Ensembl=ENSPTRG00000039392|UniProtKB=K7CAI7	H1-0	H1 histone family, member 0;H1-0;ortholog	HISTONE H1.0 (PTHR11467:SF154)	chromatin/chromatin-binding, or -regulatory protein(PC00077)	Pan troglodytes
HUMAN|HGNC=3013|UniProtKB=Q14117	DPYS	Dihydropyrimidinase;DPYS;ortholog	DIHYDROPYRIMIDINASE (PTHR11647:SF50)	hydrolase(PC00121)	Homo sapiens
GORGO|Ensembl=ENSGGOG00000026357|UniProtKB=G3S6S1	PRDX6	Peroxiredoxin-6;PRDX6;ortholog	PEROXIREDOXIN-6 (PTHR43503:SF11)	peroxidase(PC00180)	Gorilla gorilla gorilla
CANLF|Ensembl=ENSCAFG00000001149|UniProtKB=Q9GL24	CTSL1	Procathepsin L;CTSL;ortholog	CATHEPSIN L2 (PTHR12411:SF57)	cysteine protease(PC00081)	Canis lupus familiaris
LEPIN|EnsemblGenome=LA_2623|UniProtKB=Q8F2Y8	GST	Glutathione transferase;gst;ortholog	GLUTATHIONE S-TRANSFERASE RHO (PTHR43900:SF3)	transferase(PC00220)	Leptospira interrogans
MONDO|Ensembl=ENSMODG00000002501|UniProtKB=A0A5F8GFU0	ALDH1A1	Aldehyde dehydrogenase 1 family member A1;ALDH1A1;ortholog	RETINAL DEHYDROGENASE 1 (PTHR11699:SF140)	dehydrogenase(PC00092)	Monodelphis domestica
GORGO|Ensembl=ENSGGOG00000042521|UniProtKB=A0A2I2YMI0	SH3GLB1	Endophilin-B1;SH3GLB1;ortholog	ENDOPHILIN-B1 (PTHR14167:SF52)	scaffold/adaptor protein(PC00226)	Gorilla gorilla gorilla
BOVIN|Ensembl=ENSBTAG00000012275|UniProtKB=A0A452DJC8	ENDOU	Poly(U)-specific endoribonuclease;ENDOU;ortholog	POLY(U)-SPECIFIC ENDORIBONUCLEASE (PTHR12439:SF40)		Bos taurus
XENTR|Ensembl=ENSXETG00000015724|UniProtKB=A0A6I8S0N1	TYMP	Thymidine phosphorylase;tymp;ortholog	THYMIDINE PHOSPHORYLASE (PTHR10515:SF0)	glycosyltransferase(PC00111)	Xenopus tropicalis
HORSE|Ensembl=ENSECAG00000022211|UniProtKB=A0A3Q2I8G2	NPEPL1	Aminopeptidase like 1;NPEPL1;ortholog	AMINOPEPTIDASE NPEPL1-RELATED (PTHR11963:SF4)	metalloprotease(PC00153)	Equus caballus
PANTR|Ensembl=ENSPTRG00000018892|UniProtKB=H2QU49	Fscn1	Fascin;FSCN1;ortholog	FASCIN (PTHR10551:SF23)	non-motor actin binding protein(PC00165)	Pan troglodytes
CHICK|Ensembl=ENSGALG00000006512|UniProtKB=A0A1D5PFJ6	HSPA8	Heat shock cognate 71 kDa protein;HSPA8;ortholog	HEAT SHOCK COGNATE 71 KDA PROTEIN (PTHR19375:SF379)	Hsp70 family chaperone(PC00027)	Gallus gallus
YEAST|SGD=S000007268|UniProtKB=P00854	ATP6	ATP synthase subunit a;ATP6;ortholog	ATP SYNTHASE SUBUNIT A (PTHR11410:SF0)	ATP synthase(PC00002)	Saccharomyces cerevisiae
MACMU|Ensembl=ENSMMUG00000023698|UniProtKB=F7HCV3	GOSR1	28 kDa Golgi SNARE protein;GOSR1;ortholog	GOLGI SNAP RECEPTOR COMPLEX MEMBER 1 (PTHR21094:SF2)	SNARE protein(PC00034)	Macaca mulatta
SYNY3|Gene=gst|UniProtKB=Q55139	GST	Glutathione S-transferase;gst;ortholog	GLUTATHIONE S-TRANSFERASE RHO (PTHR43900:SF3)	transferase(PC00220)	Synechocystis
RAT|RGD=3560|UniProtKB=Q03336	Rgn	Regucalcin;Rgn;ortholog	REGUCALCIN (PTHR10907:SF54)	esterase(PC00097)	Rattus norvegicus
CANLF|Ensembl=ENSCAFG00000001106|UniProtKB=F1PEZ5	LAMA2	Laminin subunit alpha 2;LAMA2;ortholog	LAMININ SUBUNIT ALPHA-2 (PTHR10574:SF291)	extracellular matrix protein(PC00102)	Canis lupus familiaris
MONDO|Ensembl=ENSMODG00000009733|UniProtKB=H9H6B8	ENDOU	Poly(U)-specific endoribonuclease;ENDOU;ortholog	POLY(U)-SPECIFIC ENDORIBONUCLEASE (PTHR12439:SF40)		Monodelphis domestica
BOVIN|Gene=ANPEP|UniProtKB=P79098	ANPEP	Aminopeptidase N;ANPEP;ortholog	AMINOPEPTIDASE N (PTHR11533:SF172)	metalloprotease(PC00153)	Bos taurus
HELAN|EnsemblGenome=HannXRQ_Chr14g0444781|UniProtKB=A0A251SIF8	glnA	Glutamine synthetase;GLNA;ortholog	GLUTAMINE SYNTHETASE (PTHR20852:SF107)	ligase(PC00142)	Helianthus annuus
GORGO|Ensembl=ENSGGOG00000007579|UniProtKB=G3QX82	CD81	Tetraspanin;CD81;ortholog	CD81 ANTIGEN (PTHR19282:SF214)	scaffold/adaptor protein(PC00226)	Gorilla gorilla gorilla
MOUSE|MGI=MGI=1913304|UniProtKB=Q9D1A2	CNDP2	Cytosolic non-specific dipeptidase;Cndp2;ortholog	CYTOSOLIC NON-SPECIFIC DIPEPTIDASE (PTHR43270:SF11)	metalloprotease(PC00153)	Mus musculus
ARATH|TAIR=locus=2084410|UniProtKB=P0CJ47	act3	Actin-3;ACT3;ortholog	ACTIN-1-RELATED (PTHR11937:SF529)	actin and actin related protein(PC00039)	Arabidopsis thaliana
PANTR|Ensembl=ENSPTRG00000000102|UniProtKB=A0A2I3SNT8	PARK7	Maillard deglycase;PARK7;ortholog	PARKINSON DISEASE PROTEIN 7 (PTHR48094:SF16)		Pan troglodytes
MAIZE|Gene=CPK2|UniProtKB=P49101	CPK2	Calcium-dependent protein kinase 2;CPK2;ortholog	CALCIUM-DEPENDENT PROTEIN KINASE 33-RELATED (PTHR24349:SF350)	non-receptor serine/threonine protein kinase(PC00167)	Zea mays
FELCA|Ensembl=ENSFCAG00000005957|UniProtKB=A0A5F5XHA4	LAMA2	Laminin subunit alpha 2;LAMA2;ortholog	LAMININ SUBUNIT ALPHA-2 (PTHR10574:SF291)	extracellular matrix protein(PC00102)	Felis catus
ORNAN|Ensembl=ENSOANG00000040266|UniProtKB=A0A6I8N9H2	ARPP19	cAMP regulated phosphoprotein 19;ARPP19;ortholog	CAMP-REGULATED PHOSPHOPROTEIN 19 (PTHR10358:SF4)		Ornithorhynchus anatinus
ANOCA|Ensembl=ENSACAG00000003710|UniProtKB=G1KC68	CSRP1	Uncharacterized protein;CSRP1;ortholog	CYSTEINE AND GLYCINE-RICH PROTEIN 1 (PTHR24215:SF23)	actin or actin-binding cytoskeletal protein(PC00041)	Anolis carolinensis
MACMU|Ensembl=ENSMMUG00000002241|UniProtKB=F6VZ13	RDX	Radixin;RDX;ortholog	RADIXIN (PTHR23281:SF14)	actin or actin-binding cytoskeletal protein(PC00041)	Macaca mulatta
MACMU|Ensembl=ENSMMUG00000009038|UniProtKB=F7FBM0	TTN	Uncharacterized protein;TTN;ortholog	TITIN (PTHR14340:SF13)		Macaca mulatta
PIG|Ensembl=ENSSSCG00000022742|UniProtKB=Q9TSX9	PRDX6	Peroxiredoxin-6;PRDX6;ortholog	PEROXIREDOXIN-6 (PTHR43503:SF4)	peroxidase(PC00180)	Sus scrofa
FELCA|Ensembl=ENSFCAG00000032911|UniProtKB=A0A2I2U7X2	RTN4R	Reticulon 4 receptor;RTN4R;ortholog	RETICULON-4 RECEPTOR (PTHR45836:SF6)		Felis catus
PIG|Ensembl=ENSSSCG00000033010|UniProtKB=A0A287A608	AHNAK	AHNAK nucleoprotein;AHNAK;ortholog	NEUROBLAST DIFFERENTIATION-ASSOCIATED PROTEIN AHNAK (PTHR23348:SF41)		Sus scrofa
MOUSE|MGI=MGI=1915226|UniProtKB=Q99JY4	TRABD	TraB domain-containing protein;Trabd;ortholog	TRAB DOMAIN-CONTAINING PROTEIN (PTHR21530:SF7)		Mus musculus
DICDI|dictyBase=DDB_G0289327|UniProtKB=P10733	sevA	Severin;sevA;ortholog	HP DOMAIN-CONTAINING PROTEIN-RELATED (PTHR11977:SF130)	non-motor actin binding protein(PC00165)	Dictyostelium discoideum
