# Supplementary material for: Identifying Natural Bioactive Peptides from the Common Octopus (Octopus vulgaris Cuvier, 1797) Skin Mucus By-Products Using Proteogenomic Analysis
Source: Int J Mol Sci. 2023 Apr 12;24(8):7145. doi: 10.3390/ijms24087145 (PMC10138644; doi:10.3390/ijms24087145)
Supplement: Supplementary file 1 [file ijms-24-07145-s001.zip › Table S4. Bioactive peptides digestions (trypsin and pepsin) using MS-Digest software.xlsx]

## Sheet: Pepsin
Table S4: Bioactive peptides digestions (trypsin and pepsin) using MS-Digest software
Protein	m/z (mi)	m/z (av)	Start	End	Sequence	Peptide Ranker Score	Lenght
>tr|A0A6P7SER3|A0A6P7SER3_OCTVU hemocyanin 1-like OS=Octopus vulgaris OX=6645 GN=LOC115212215 PE=4 SV=2	804.432	804.886	5550	5556	NKNTTRA	0.0862989	7
>tr|A0A6P7SER3|A0A6P7SER3_OCTVU hemocyanin 1-like OS=Octopus vulgaris OX=6645 GN=LOC115212215 PE=4 SV=2	806.314	806.877	2835	2841	GGEHEMF	0.570008	7
>tr|A0A6P7SER3|A0A6P7SER3_OCTVU hemocyanin 1-like OS=Octopus vulgaris OX=6645 GN=LOC115212215 PE=4 SV=2	806.314	806.877	5757	5763	GGEHEMF	0.570008	7
>tr|A0A6P7SER3|A0A6P7SER3_OCTVU hemocyanin 1-like OS=Octopus vulgaris OX=6645 GN=LOC115212215 PE=4 SV=2	809.415	809.903	99	105	TQPVDHL	0.186904	7
>tr|A0A6P7SER3|A0A6P7SER3_OCTVU hemocyanin 1-like OS=Octopus vulgaris OX=6645 GN=LOC115212215 PE=4 SV=2	809.415	809.903	3021	3027	TQPVDHL	0.186904	7
>tr|A0A6P7SER3|A0A6P7SER3_OCTVU hemocyanin 1-like OS=Octopus vulgaris OX=6645 GN=LOC115212215 PE=4 SV=2	810.458	810.937	2311	2316	QEHRKL	0.199384	6
>tr|A0A6P7SER3|A0A6P7SER3_OCTVU hemocyanin 1-like OS=Octopus vulgaris OX=6645 GN=LOC115212215 PE=4 SV=2	810.458	810.937	5233	5238	QEHRKL	0.199384	6
>tr|A0A6P7SER3|A0A6P7SER3_OCTVU hemocyanin 1-like OS=Octopus vulgaris OX=6645 GN=LOC115212215 PE=4 SV=2	820.387	820.945	2579	2585	VKQMEDA	0.0663594	7
>tr|A0A6P7SER3|A0A6P7SER3_OCTVU hemocyanin 1-like OS=Octopus vulgaris OX=6645 GN=LOC115212215 PE=4 SV=2	820.387	820.945	5501	5507	VKQMEDA	0.0663594	7
>tr|A0A6P7SER3|A0A6P7SER3_OCTVU hemocyanin 1-like OS=Octopus vulgaris OX=6645 GN=LOC115212215 PE=4 SV=2	822.309	822.877	2835	2841	GGEHEMF	0.570008	7
>tr|A0A6P7SER3|A0A6P7SER3_OCTVU hemocyanin 1-like OS=Octopus vulgaris OX=6645 GN=LOC115212215 PE=4 SV=2	822.309	822.877	5757	5763	GGEHEMF	0.570008	7
>tr|A0A6P7SER3|A0A6P7SER3_OCTVU hemocyanin 1-like OS=Octopus vulgaris OX=6645 GN=LOC115212215 PE=4 SV=2	830.484	830.968	2510	2516	RKNVNSL	0.0883515	7
>tr|A0A6P7SER3|A0A6P7SER3_OCTVU hemocyanin 1-like OS=Octopus vulgaris OX=6645 GN=LOC115212215 PE=4 SV=2	830.484	830.968	5432	5438	RKNVNSL	0.0883515	7
>tr|A0A6P7SER3|A0A6P7SER3_OCTVU hemocyanin 1-like OS=Octopus vulgaris OX=6645 GN=LOC115212215 PE=4 SV=2	832.489	832.981	8	14	RKSVETL	0.0698136	7
>tr|A0A6P7SER3|A0A6P7SER3_OCTVU hemocyanin 1-like OS=Octopus vulgaris OX=6645 GN=LOC115212215 PE=4 SV=2	832.489	832.981	2930	2936	RKSVETL	0.0698136	7
>tr|A0A6P7SER3|A0A6P7SER3_OCTVU hemocyanin 1-like OS=Octopus vulgaris OX=6645 GN=LOC115212215 PE=4 SV=2	833.452	833.968	400	406	PRPTVTY	0.206868	7
>tr|A0A6P7SER3|A0A6P7SER3_OCTVU hemocyanin 1-like OS=Octopus vulgaris OX=6645 GN=LOC115212215 PE=4 SV=2	833.452	833.968	3322	3328	PRPTVTY	0.206868	7
>tr|A0A6P7SER3|A0A6P7SER3_OCTVU hemocyanin 1-like OS=Octopus vulgaris OX=6645 GN=LOC115212215 PE=4 SV=2	834.377	834.932	27	33	RVMQDDA	0.112104	7
>tr|A0A6P7SER3|A0A6P7SER3_OCTVU hemocyanin 1-like OS=Octopus vulgaris OX=6645 GN=LOC115212215 PE=4 SV=2	835.434	836.004	1200	1206	TKQMKEA	0.0483105	7
>tr|A0A6P7SER3|A0A6P7SER3_OCTVU hemocyanin 1-like OS=Octopus vulgaris OX=6645 GN=LOC115212215 PE=4 SV=2	835.434	836.004	4122	4128	TKQMKEA	0.0483105	7
>tr|A0A6P7SER3|A0A6P7SER3_OCTVU hemocyanin 1-like OS=Octopus vulgaris OX=6645 GN=LOC115212215 PE=4 SV=2	836.382	836.945	2579	2585	VKQMEDA	0.0663594	7
>tr|A0A6P7SER3|A0A6P7SER3_OCTVU hemocyanin 1-like OS=Octopus vulgaris OX=6645 GN=LOC115212215 PE=4 SV=2	836.382	836.945	5501	5507	VKQMEDA	0.0663594	7
>tr|A0A6P7SER3|A0A6P7SER3_OCTVU hemocyanin 1-like OS=Octopus vulgaris OX=6645 GN=LOC115212215 PE=4 SV=2	837.458	837.96	665	671	SEVHRPL	0.307476	7
>tr|A0A6P7SER3|A0A6P7SER3_OCTVU hemocyanin 1-like OS=Octopus vulgaris OX=6645 GN=LOC115212215 PE=4 SV=2	837.458	837.96	3587	3593	SEVHRPL	0.307476	7
>tr|A0A6P7SER3|A0A6P7SER3_OCTVU hemocyanin 1-like OS=Octopus vulgaris OX=6645 GN=LOC115212215 PE=4 SV=2	844.525	845.036	1630	1636	RVKTEVI	0.0304109	7
>tr|A0A6P7SER3|A0A6P7SER3_OCTVU hemocyanin 1-like OS=Octopus vulgaris OX=6645 GN=LOC115212215 PE=4 SV=2	848.429	849.002	712	719	GGMSVREL	0.331735	8
>tr|A0A6P7SER3|A0A6P7SER3_OCTVU hemocyanin 1-like OS=Octopus vulgaris OX=6645 GN=LOC115212215 PE=4 SV=2	848.429	849.002	3634	3641	GGMSVREL	0.331735	8
>tr|A0A6P7SER3|A0A6P7SER3_OCTVU hemocyanin 1-like OS=Octopus vulgaris OX=6645 GN=LOC115212215 PE=4 SV=2	850.372	850.931	27	33	RVMQDDA	0.112104	7
>tr|A0A6P7SER3|A0A6P7SER3_OCTVU hemocyanin 1-like OS=Octopus vulgaris OX=6645 GN=LOC115212215 PE=4 SV=2	851.429	852.003	1200	1206	TKQMKEA	0.0483105	7
>tr|A0A6P7SER3|A0A6P7SER3_OCTVU hemocyanin 1-like OS=Octopus vulgaris OX=6645 GN=LOC115212215 PE=4 SV=2	851.429	852.003	4122	4128	TKQMKEA	0.0483105	7
>tr|A0A6P7SER3|A0A6P7SER3_OCTVU hemocyanin 1-like OS=Octopus vulgaris OX=6645 GN=LOC115212215 PE=4 SV=2	853.376	853.975	1939	1945	SKPEDMF	0.704257	7
>tr|A0A6P7SER3|A0A6P7SER3_OCTVU hemocyanin 1-like OS=Octopus vulgaris OX=6645 GN=LOC115212215 PE=4 SV=2	853.376	853.975	4861	4867	SKPEDMF	0.704257	7
>tr|A0A6P7SER3|A0A6P7SER3_OCTVU hemocyanin 1-like OS=Octopus vulgaris OX=6645 GN=LOC115212215 PE=4 SV=2	859.474	859.966	2093	2099	RRNVDSL	0.131134	7
>tr|A0A6P7SER3|A0A6P7SER3_OCTVU hemocyanin 1-like OS=Octopus vulgaris OX=6645 GN=LOC115212215 PE=4 SV=2	859.474	859.966	5015	5021	RRNVDSL	0.131134	7
>tr|A0A6P7SER3|A0A6P7SER3_OCTVU hemocyanin 1-like OS=Octopus vulgaris OX=6645 GN=LOC115212215 PE=4 SV=2	860.445	861.06	1493	1499	NVPMRPF	0.853557	7
>tr|A0A6P7SER3|A0A6P7SER3_OCTVU hemocyanin 1-like OS=Octopus vulgaris OX=6645 GN=LOC115212215 PE=4 SV=2	860.445	861.06	4415	4421	NVPMRPF	0.853557	7
>tr|A0A6P7SER3|A0A6P7SER3_OCTVU hemocyanin 1-like OS=Octopus vulgaris OX=6645 GN=LOC115212215 PE=4 SV=2	860.472	860.989	2470	2477	ETVDGKVL	0.0771665	8
>tr|A0A6P7SER3|A0A6P7SER3_OCTVU hemocyanin 1-like OS=Octopus vulgaris OX=6645 GN=LOC115212215 PE=4 SV=2	860.472	860.989	5392	5399	ETVDGKVL	0.0771665	8
>tr|A0A6P7SER3|A0A6P7SER3_OCTVU hemocyanin 1-like OS=Octopus vulgaris OX=6645 GN=LOC115212215 PE=4 SV=2	862.46	863.076	1081	1087	RKPMSPF	0.808003	7
>tr|A0A6P7SER3|A0A6P7SER3_OCTVU hemocyanin 1-like OS=Octopus vulgaris OX=6645 GN=LOC115212215 PE=4 SV=2	862.46	863.076	4003	4009	RKPMSPF	0.808003	7
>tr|A0A6P7SER3|A0A6P7SER3_OCTVU hemocyanin 1-like OS=Octopus vulgaris OX=6645 GN=LOC115212215 PE=4 SV=2	864.356	864.958	2017	2024	GGSTEMPW	0.676037	8
>tr|A0A6P7SER3|A0A6P7SER3_OCTVU hemocyanin 1-like OS=Octopus vulgaris OX=6645 GN=LOC115212215 PE=4 SV=2	864.356	864.958	4939	4946	GGSTEMPW	0.676037	8
>tr|A0A6P7SER3|A0A6P7SER3_OCTVU hemocyanin 1-like OS=Octopus vulgaris OX=6645 GN=LOC115212215 PE=4 SV=2	864.424	865.002	712	719	GGMSVREL	0.331735	8
>tr|A0A6P7SER3|A0A6P7SER3_OCTVU hemocyanin 1-like OS=Octopus vulgaris OX=6645 GN=LOC115212215 PE=4 SV=2	864.424	865.002	3634	3641	GGMSVREL	0.331735	8
>tr|A0A6P7SER3|A0A6P7SER3_OCTVU hemocyanin 1-like OS=Octopus vulgaris OX=6645 GN=LOC115212215 PE=4 SV=2	869.371	869.974	1939	1945	SKPEDMF	0.704257	7
>tr|A0A6P7SER3|A0A6P7SER3_OCTVU hemocyanin 1-like OS=Octopus vulgaris OX=6645 GN=LOC115212215 PE=4 SV=2	869.371	869.974	4861	4867	SKPEDMF	0.704257	7
>tr|A0A6P7SER3|A0A6P7SER3_OCTVU hemocyanin 1-like OS=Octopus vulgaris OX=6645 GN=LOC115212215 PE=4 SV=2	871.377	871.996	3166	3172	HNPMEPF	0.804284	7
>tr|A0A6P7SER3|A0A6P7SER3_OCTVU hemocyanin 1-like OS=Octopus vulgaris OX=6645 GN=LOC115212215 PE=4 SV=2	872.393	872.981	115	122	MDPSSHKA	0.234593	8
>tr|A0A6P7SER3|A0A6P7SER3_OCTVU hemocyanin 1-like OS=Octopus vulgaris OX=6645 GN=LOC115212215 PE=4 SV=2	872.393	872.981	3037	3044	MDPSSHKA	0.234593	8
>tr|A0A6P7SER3|A0A6P7SER3_OCTVU hemocyanin 1-like OS=Octopus vulgaris OX=6645 GN=LOC115212215 PE=4 SV=2	876.44	877.059	1493	1499	NVPMRPF	0.853557	7
>tr|A0A6P7SER3|A0A6P7SER3_OCTVU hemocyanin 1-like OS=Octopus vulgaris OX=6645 GN=LOC115212215 PE=4 SV=2	876.44	877.059	4415	4421	NVPMRPF	0.853557	7
>tr|A0A6P7SER3|A0A6P7SER3_OCTVU hemocyanin 1-like OS=Octopus vulgaris OX=6645 GN=LOC115212215 PE=4 SV=2	877.405	877.935	5535	5541	EKENNPF	0.228715	7
>tr|A0A6P7SER3|A0A6P7SER3_OCTVU hemocyanin 1-like OS=Octopus vulgaris OX=6645 GN=LOC115212215 PE=4 SV=2	878.455	879.075	1081	1087	RKPMSPF	0.808003	7
>tr|A0A6P7SER3|A0A6P7SER3_OCTVU hemocyanin 1-like OS=Octopus vulgaris OX=6645 GN=LOC115212215 PE=4 SV=2	878.455	879.075	4003	4009	RKPMSPF	0.808003	7
>tr|A0A6P7SER3|A0A6P7SER3_OCTVU hemocyanin 1-like OS=Octopus vulgaris OX=6645 GN=LOC115212215 PE=4 SV=2	879.431	880.12	2901	2907	EEVMMKI	0.150837	7
>tr|A0A6P7SER3|A0A6P7SER3_OCTVU hemocyanin 1-like OS=Octopus vulgaris OX=6645 GN=LOC115212215 PE=4 SV=2	880.351	880.957	2017	2024	GGSTEMPW	0.676037	8
>tr|A0A6P7SER3|A0A6P7SER3_OCTVU hemocyanin 1-like OS=Octopus vulgaris OX=6645 GN=LOC115212215 PE=4 SV=2	880.351	880.957	4939	4946	GGSTEMPW	0.676037	8
>tr|A0A6P7SER3|A0A6P7SER3_OCTVU hemocyanin 1-like OS=Octopus vulgaris OX=6645 GN=LOC115212215 PE=4 SV=2	881.557	882.1	2496	2502	KKEVHKI	0.0527299	7
>tr|A0A6P7SER3|A0A6P7SER3_OCTVU hemocyanin 1-like OS=Octopus vulgaris OX=6645 GN=LOC115212215 PE=4 SV=2	881.557	882.1	5418	5424	KKEVHKI	0.0527299	7
>tr|A0A6P7SER3|A0A6P7SER3_OCTVU hemocyanin 1-like OS=Octopus vulgaris OX=6645 GN=LOC115212215 PE=4 SV=2	885.429	886.067	244	250	HKPMEPF	0.734071	7
>tr|A0A6P7SER3|A0A6P7SER3_OCTVU hemocyanin 1-like OS=Octopus vulgaris OX=6645 GN=LOC115212215 PE=4 SV=2	887.372	887.995	3166	3172	HNPMEPF	0.804284	7
>tr|A0A6P7SER3|A0A6P7SER3_OCTVU hemocyanin 1-like OS=Octopus vulgaris OX=6645 GN=LOC115212215 PE=4 SV=2	888.388	888.98	115	122	MDPSSHKA	0.234593	8
>tr|A0A6P7SER3|A0A6P7SER3_OCTVU hemocyanin 1-like OS=Octopus vulgaris OX=6645 GN=LOC115212215 PE=4 SV=2	888.388	888.98	3037	3044	MDPSSHKA	0.234593	8
>tr|A0A6P7SER3|A0A6P7SER3_OCTVU hemocyanin 1-like OS=Octopus vulgaris OX=6645 GN=LOC115212215 PE=4 SV=2	890.412	890.936	681	687	NNNKHTY	0.121699	7
>tr|A0A6P7SER3|A0A6P7SER3_OCTVU hemocyanin 1-like OS=Octopus vulgaris OX=6645 GN=LOC115212215 PE=4 SV=2	890.412	890.936	3603	3609	NNNKHTY	0.121699	7
>tr|A0A6P7SER3|A0A6P7SER3_OCTVU hemocyanin 1-like OS=Octopus vulgaris OX=6645 GN=LOC115212215 PE=4 SV=2	892.351	892.968	1597	1604	GGESEMPW	0.555253	8
>tr|A0A6P7SER3|A0A6P7SER3_OCTVU hemocyanin 1-like OS=Octopus vulgaris OX=6645 GN=LOC115212215 PE=4 SV=2	892.351	892.968	4519	4526	GGESEMPW	0.555253	8
>tr|A0A6P7SER3|A0A6P7SER3_OCTVU hemocyanin 1-like OS=Octopus vulgaris OX=6645 GN=LOC115212215 PE=4 SV=2	895.426	896.119	2901	2907	EEVMMKI	0.150837	7
>tr|A0A6P7SER3|A0A6P7SER3_OCTVU hemocyanin 1-like OS=Octopus vulgaris OX=6645 GN=LOC115212215 PE=4 SV=2	901.424	902.066	244	250	HKPMEPF	0.734071	7
>tr|A0A6P7SER3|A0A6P7SER3_OCTVU hemocyanin 1-like OS=Octopus vulgaris OX=6645 GN=LOC115212215 PE=4 SV=2	905.346	905.967	2425	2432	GGDNEMPW	0.778264	8
>tr|A0A6P7SER3|A0A6P7SER3_OCTVU hemocyanin 1-like OS=Octopus vulgaris OX=6645 GN=LOC115212215 PE=4 SV=2	905.346	905.967	5347	5354	GGDNEMPW	0.778264	8
>tr|A0A6P7SER3|A0A6P7SER3_OCTVU hemocyanin 1-like OS=Octopus vulgaris OX=6645 GN=LOC115212215 PE=4 SV=2	908.346	908.968	1597	1604	GGESEMPW	0.555253	8
>tr|A0A6P7SER3|A0A6P7SER3_OCTVU hemocyanin 1-like OS=Octopus vulgaris OX=6645 GN=LOC115212215 PE=4 SV=2	908.346	908.968	4519	4526	GGESEMPW	0.555253	8
>tr|A0A6P7SER3|A0A6P7SER3_OCTVU hemocyanin 1-like OS=Octopus vulgaris OX=6645 GN=LOC115212215 PE=4 SV=2	911.421	912.119	2901	2907	EEVMMKI	0.150837	7
>tr|A0A6P7SER3|A0A6P7SER3_OCTVU hemocyanin 1-like OS=Octopus vulgaris OX=6645 GN=LOC115212215 PE=4 SV=2	913.416	913.971	2794	2800	QHEDRVF	0.372931	7
>tr|A0A6P7SER3|A0A6P7SER3_OCTVU hemocyanin 1-like OS=Octopus vulgaris OX=6645 GN=LOC115212215 PE=4 SV=2	913.416	913.971	5716	5722	QHEDRVF	0.372931	7
>tr|A0A6P7SER3|A0A6P7SER3_OCTVU hemocyanin 1-like OS=Octopus vulgaris OX=6645 GN=LOC115212215 PE=4 SV=2	916.398	917.037	348	355	GGVHEMTW	0.479901	8
>tr|A0A6P7SER3|A0A6P7SER3_OCTVU hemocyanin 1-like OS=Octopus vulgaris OX=6645 GN=LOC115212215 PE=4 SV=2	916.398	917.037	3270	3277	GGVHEMTW	0.479901	8
>tr|A0A6P7SER3|A0A6P7SER3_OCTVU hemocyanin 1-like OS=Octopus vulgaris OX=6645 GN=LOC115212215 PE=4 SV=2	921.341	921.966	2425	2432	GGDNEMPW	0.778264	8
>tr|A0A6P7SER3|A0A6P7SER3_OCTVU hemocyanin 1-like OS=Octopus vulgaris OX=6645 GN=LOC115212215 PE=4 SV=2	921.341	921.966	5347	5354	GGDNEMPW	0.778264	8
>tr|A0A6P7SER3|A0A6P7SER3_OCTVU hemocyanin 1-like OS=Octopus vulgaris OX=6645 GN=LOC115212215 PE=4 SV=2	923.393	924.026	767	774	GGSKEMEW	0.438552	8
>tr|A0A6P7SER3|A0A6P7SER3_OCTVU hemocyanin 1-like OS=Octopus vulgaris OX=6645 GN=LOC115212215 PE=4 SV=2	923.393	924.026	3689	3696	GGSKEMEW	0.438552	8
>tr|A0A6P7SER3|A0A6P7SER3_OCTVU hemocyanin 1-like OS=Octopus vulgaris OX=6645 GN=LOC115212215 PE=4 SV=2	930.443	931.002	2794	2800	QHEDRVF	0.372931	7
>tr|A0A6P7SER3|A0A6P7SER3_OCTVU hemocyanin 1-like OS=Octopus vulgaris OX=6645 GN=LOC115212215 PE=4 SV=2	930.443	931.002	5716	5722	QHEDRVF	0.372931	7
>tr|A0A6P7SER3|A0A6P7SER3_OCTVU hemocyanin 1-like OS=Octopus vulgaris OX=6645 GN=LOC115212215 PE=4 SV=2	932.393	933.037	348	355	GGVHEMTW	0.479901	8
>tr|A0A6P7SER3|A0A6P7SER3_OCTVU hemocyanin 1-like OS=Octopus vulgaris OX=6645 GN=LOC115212215 PE=4 SV=2	932.393	933.037	3270	3277	GGVHEMTW	0.479901	8
>tr|A0A6P7SER3|A0A6P7SER3_OCTVU hemocyanin 1-like OS=Octopus vulgaris OX=6645 GN=LOC115212215 PE=4 SV=2	935.458	936.018	149	157	QSSKGGKNF	0.44303	9
>tr|A0A6P7SER3|A0A6P7SER3_OCTVU hemocyanin 1-like OS=Octopus vulgaris OX=6645 GN=LOC115212215 PE=4 SV=2	935.458	936.018	3071	3079	QSSKGGKNF	0.44303	9
>tr|A0A6P7SER3|A0A6P7SER3_OCTVU hemocyanin 1-like OS=Octopus vulgaris OX=6645 GN=LOC115212215 PE=4 SV=2	939.388	940.025	767	774	GGSKEMEW	0.438552	8
>tr|A0A6P7SER3|A0A6P7SER3_OCTVU hemocyanin 1-like OS=Octopus vulgaris OX=6645 GN=LOC115212215 PE=4 SV=2	939.388	940.025	3689	3696	GGSKEMEW	0.438552	8
>tr|A0A6P7SER3|A0A6P7SER3_OCTVU hemocyanin 1-like OS=Octopus vulgaris OX=6645 GN=LOC115212215 PE=4 SV=2	952.485	953.049	149	157	QSSKGGKNF	0.44303	9
>tr|A0A6P7SER3|A0A6P7SER3_OCTVU hemocyanin 1-like OS=Octopus vulgaris OX=6645 GN=LOC115212215 PE=4 SV=2	952.485	953.049	3071	3079	QSSKGGKNF	0.44303	9
>tr|A0A6P7SER3|A0A6P7SER3_OCTVU hemocyanin 1-like OS=Octopus vulgaris OX=6645 GN=LOC115212215 PE=4 SV=2	971.308	972	2410	2418	CNDTTCEDA	0.131899	9
>tr|A0A6P7SER3|A0A6P7SER3_OCTVU hemocyanin 1-like OS=Octopus vulgaris OX=6645 GN=LOC115212215 PE=4 SV=2	977.491	978.062	1884	1891	HHSNVDRL	0.329543	8
>tr|A0A6P7SER3|A0A6P7SER3_OCTVU hemocyanin 1-like OS=Octopus vulgaris OX=6645 GN=LOC115212215 PE=4 SV=2	977.491	978.062	4806	4813	HHSNVDRL	0.329543	8
>tr|A0A6P7SER3|A0A6P7SER3_OCTVU hemocyanin 1-like OS=Octopus vulgaris OX=6645 GN=LOC115212215 PE=4 SV=2	979.47	980.034	2705	2712	HHSNTDRI	0.233481	8
>tr|A0A6P7SER3|A0A6P7SER3_OCTVU hemocyanin 1-like OS=Octopus vulgaris OX=6645 GN=LOC115212215 PE=4 SV=2	979.47	980.034	5627	5634	HHSNTDRI	0.233481	8
>tr|A0A6P7SER3|A0A6P7SER3_OCTVU hemocyanin 1-like OS=Octopus vulgaris OX=6645 GN=LOC115212215 PE=4 SV=2	984.374	985.198	482	490	CCVHGMSTF	0.712209	9
>tr|A0A6P7SER3|A0A6P7SER3_OCTVU hemocyanin 1-like OS=Octopus vulgaris OX=6645 GN=LOC115212215 PE=4 SV=2	984.374	985.198	3404	3412	CCVHGMSTF	0.712209	9
>tr|A0A6P7SER3|A0A6P7SER3_OCTVU hemocyanin 1-like OS=Octopus vulgaris OX=6645 GN=LOC115212215 PE=4 SV=2	985.36	986.071	5332	5340	CKDTTCEDA	0.108737	9
>tr|A0A6P7SER3|A0A6P7SER3_OCTVU hemocyanin 1-like OS=Octopus vulgaris OX=6645 GN=LOC115212215 PE=4 SV=2	987.391	988.133	5741	5749	CTKDGDCVF	0.512675	9
>tr|A0A6P7SER3|A0A6P7SER3_OCTVU hemocyanin 1-like OS=Octopus vulgaris OX=6645 GN=LOC115212215 PE=4 SV=2	987.427	988.001	435	442	TTEEEHEL	0.0266805	8
>tr|A0A6P7SER3|A0A6P7SER3_OCTVU hemocyanin 1-like OS=Octopus vulgaris OX=6645 GN=LOC115212215 PE=4 SV=2	991.507	992.089	636	643	HHSQVDRL	0.282885	8
>tr|A0A6P7SER3|A0A6P7SER3_OCTVU hemocyanin 1-like OS=Octopus vulgaris OX=6645 GN=LOC115212215 PE=4 SV=2	991.507	992.089	3558	3565	HHSQVDRL	0.282885	8
>tr|A0A6P7SER3|A0A6P7SER3_OCTVU hemocyanin 1-like OS=Octopus vulgaris OX=6645 GN=LOC115212215 PE=4 SV=2	991.507	992.089	212	219	HHSNVERL	0.275042	8
>tr|A0A6P7SER3|A0A6P7SER3_OCTVU hemocyanin 1-like OS=Octopus vulgaris OX=6645 GN=LOC115212215 PE=4 SV=2	991.507	992.089	3134	3141	HHSNVERL	0.275042	8
>tr|A0A6P7SER3|A0A6P7SER3_OCTVU hemocyanin 1-like OS=Octopus vulgaris OX=6645 GN=LOC115212215 PE=4 SV=2	993.438	994.181	54	63	PDGSTVVCCL	0.659001	10
>tr|A0A6P7SER3|A0A6P7SER3_OCTVU hemocyanin 1-like OS=Octopus vulgaris OX=6645 GN=LOC115212215 PE=4 SV=2	993.438	994.181	2976	2985	PDGSTVVCCL	0.659001	10
>tr|A0A6P7SER3|A0A6P7SER3_OCTVU hemocyanin 1-like OS=Octopus vulgaris OX=6645 GN=LOC115212215 PE=4 SV=2	994.489	995.155	2296	2303	HHSMVDRL	0.457398	8
>tr|A0A6P7SER3|A0A6P7SER3_OCTVU hemocyanin 1-like OS=Octopus vulgaris OX=6645 GN=LOC115212215 PE=4 SV=2	994.489	995.155	5218	5225	HHSMVDRL	0.457398	8
>tr|A0A6P7SER3|A0A6P7SER3_OCTVU hemocyanin 1-like OS=Octopus vulgaris OX=6645 GN=LOC115212215 PE=4 SV=2	1000.37	1001.2	482	490	CCVHGMSTF	0.712209	9
>tr|A0A6P7SER3|A0A6P7SER3_OCTVU hemocyanin 1-like OS=Octopus vulgaris OX=6645 GN=LOC115212215 PE=4 SV=2	1000.37	1001.2	3404	3412	CCVHGMSTF	0.712209	9
>tr|A0A6P7SER3|A0A6P7SER3_OCTVU hemocyanin 1-like OS=Octopus vulgaris OX=6645 GN=LOC115212215 PE=4 SV=2	1010.48	1011.15	2296	2303	HHSMVDRL	0.457398	8
>tr|A0A6P7SER3|A0A6P7SER3_OCTVU hemocyanin 1-like OS=Octopus vulgaris OX=6645 GN=LOC115212215 PE=4 SV=2	1010.48	1011.15	5218	5225	HHSMVDRL	0.457398	8
>tr|A0A6P7SER3|A0A6P7SER3_OCTVU hemocyanin 1-like OS=Octopus vulgaris OX=6645 GN=LOC115212215 PE=4 SV=2	1013.62	1014.22	1675	1682	VRKNVERL	0.125128	8
>tr|A0A6P7SER3|A0A6P7SER3_OCTVU hemocyanin 1-like OS=Octopus vulgaris OX=6645 GN=LOC115212215 PE=4 SV=2	1013.62	1014.22	4597	4604	VRKNVERL	0.125128	8
>tr|A0A6P7SER3|A0A6P7SER3_OCTVU hemocyanin 1-like OS=Octopus vulgaris OX=6645 GN=LOC115212215 PE=4 SV=2	1017.46	1018.08	1512	1520	THSTPNDVF	0.22504	9
>tr|A0A6P7SER3|A0A6P7SER3_OCTVU hemocyanin 1-like OS=Octopus vulgaris OX=6645 GN=LOC115212215 PE=4 SV=2	1017.46	1018.08	4434	4442	THSTPNDVF	0.22504	9
>tr|A0A6P7SER3|A0A6P7SER3_OCTVU hemocyanin 1-like OS=Octopus vulgaris OX=6645 GN=LOC115212215 PE=4 SV=2	1024.42	1025.02	865	873	EDDKSPNGY	0.246535	9
>tr|A0A6P7SER3|A0A6P7SER3_OCTVU hemocyanin 1-like OS=Octopus vulgaris OX=6645 GN=LOC115212215 PE=4 SV=2	1024.42	1025.02	3787	3795	EDDKSPNGY	0.246535	9
>tr|A0A6P7SER3|A0A6P7SER3_OCTVU hemocyanin 1-like OS=Octopus vulgaris OX=6645 GN=LOC115212215 PE=4 SV=2	1025.4	1026.25	2563	2571	CCQHGMVTF	0.745641	9
>tr|A0A6P7SER3|A0A6P7SER3_OCTVU hemocyanin 1-like OS=Octopus vulgaris OX=6645 GN=LOC115212215 PE=4 SV=2	1025.4	1026.25	5485	5493	CCQHGMVTF	0.745641	9
>tr|A0A6P7SER3|A0A6P7SER3_OCTVU hemocyanin 1-like OS=Octopus vulgaris OX=6645 GN=LOC115212215 PE=4 SV=2	1027.48	1028.07	1666	1674	KHEESNGNL	0.114054	9
>tr|A0A6P7SER3|A0A6P7SER3_OCTVU hemocyanin 1-like OS=Octopus vulgaris OX=6645 GN=LOC115212215 PE=4 SV=2	1027.48	1028.07	4588	4596	KHEESNGNL	0.114054	9
>tr|A0A6P7SER3|A0A6P7SER3_OCTVU hemocyanin 1-like OS=Octopus vulgaris OX=6645 GN=LOC115212215 PE=4 SV=2	1041.4	1042.25	2563	2571	CCQHGMVTF	0.745641	9
>tr|A0A6P7SER3|A0A6P7SER3_OCTVU hemocyanin 1-like OS=Octopus vulgaris OX=6645 GN=LOC115212215 PE=4 SV=2	1041.4	1042.25	5485	5493	CCQHGMVTF	0.745641	9
>tr|A0A6P7SER3|A0A6P7SER3_OCTVU hemocyanin 1-like OS=Octopus vulgaris OX=6645 GN=LOC115212215 PE=4 SV=2	1059.58	1060.25	540	548	TKEVKPNPF	0.199075	9
>tr|A0A6P7SER3|A0A6P7SER3_OCTVU hemocyanin 1-like OS=Octopus vulgaris OX=6645 GN=LOC115212215 PE=4 SV=2	1059.58	1060.25	3462	3470	TKEVKPNPF	0.199075	9
>tr|A0A6P7SER3|A0A6P7SER3_OCTVU hemocyanin 1-like OS=Octopus vulgaris OX=6645 GN=LOC115212215 PE=4 SV=2	1075.6	1076.21	841	849	RSRRDVSSL	0.113563	9
>tr|A0A6P7SER3|A0A6P7SER3_OCTVU hemocyanin 1-like OS=Octopus vulgaris OX=6645 GN=LOC115212215 PE=4 SV=2	1075.6	1076.21	3763	3771	RSRRDVSSL	0.113563	9
>tr|A0A6P7SER3|A0A6P7SER3_OCTVU hemocyanin 1-like OS=Octopus vulgaris OX=6645 GN=LOC115212215 PE=4 SV=2	1077.52	1078.17	2611	2619	VTEKENNPF	0.0988407	9
>tr|A0A6P7SER3|A0A6P7SER3_OCTVU hemocyanin 1-like OS=Octopus vulgaris OX=6645 GN=LOC115212215 PE=4 SV=2	1086.49	1087.2	4204	4212	KDMTTDGRY	0.179876	9
>tr|A0A6P7SER3|A0A6P7SER3_OCTVU hemocyanin 1-like OS=Octopus vulgaris OX=6645 GN=LOC115212215 PE=4 SV=2	1102.48	1103.2	4204	4212	KDMTTDGRY	0.179876	9
>tr|A0A6P7SER3|A0A6P7SER3_OCTVU hemocyanin 1-like OS=Octopus vulgaris OX=6645 GN=LOC115212215 PE=4 SV=2	1118.58	1119.23	2625	2634	DVVNKDTTRA	0.110742	10
>tr|A0A6P7SER3|A0A6P7SER3_OCTVU hemocyanin 1-like OS=Octopus vulgaris OX=6645 GN=LOC115212215 PE=4 SV=2	1126.53	1127.27	1282	1290	KDMKNDGRY	0.25432	9
>tr|A0A6P7SER3|A0A6P7SER3_OCTVU hemocyanin 1-like OS=Octopus vulgaris OX=6645 GN=LOC115212215 PE=4 SV=2	1130.58	1131.25	3219	3227	KEHQQHPRA	0.182525	9
>tr|A0A6P7SER3|A0A6P7SER3_OCTVU hemocyanin 1-like OS=Octopus vulgaris OX=6645 GN=LOC115212215 PE=4 SV=2	1137.51	1138.18	2641	2650	DDPEKGDKSF	0.311113	10
>tr|A0A6P7SER3|A0A6P7SER3_OCTVU hemocyanin 1-like OS=Octopus vulgaris OX=6645 GN=LOC115212215 PE=4 SV=2	1137.51	1138.18	5563	5572	DDPEKGDKSF	0.311113	10
>tr|A0A6P7SER3|A0A6P7SER3_OCTVU hemocyanin 1-like OS=Octopus vulgaris OX=6645 GN=LOC115212215 PE=4 SV=2	1142.53	1143.27	1282	1290	KDMKNDGRY	0.25432	9
>tr|A0A6P7SER3|A0A6P7SER3_OCTVU hemocyanin 1-like OS=Octopus vulgaris OX=6645 GN=LOC115212215 PE=4 SV=2	1143.52	1144.26	1438	1448	GGRDPHSMSSL	0.597154	11
>tr|A0A6P7SER3|A0A6P7SER3_OCTVU hemocyanin 1-like OS=Octopus vulgaris OX=6645 GN=LOC115212215 PE=4 SV=2	1143.52	1144.26	4360	4370	GGRDPHSMSSL	0.597154	11
>tr|A0A6P7SER3|A0A6P7SER3_OCTVU hemocyanin 1-like OS=Octopus vulgaris OX=6645 GN=LOC115212215 PE=4 SV=2	1149.55	1150.25	1048	1056	HHSNVDRVW	0.324079	9
>tr|A0A6P7SER3|A0A6P7SER3_OCTVU hemocyanin 1-like OS=Octopus vulgaris OX=6645 GN=LOC115212215 PE=4 SV=2	1149.55	1150.25	3970	3978	HHSNVDRVW	0.324079	9
>tr|A0A6P7SER3|A0A6P7SER3_OCTVU hemocyanin 1-like OS=Octopus vulgaris OX=6645 GN=LOC115212215 PE=4 SV=2	1153.57	1154.28	572	581	EKPTKGHHGY	0.161443	10
>tr|A0A6P7SER3|A0A6P7SER3_OCTVU hemocyanin 1-like OS=Octopus vulgaris OX=6645 GN=LOC115212215 PE=4 SV=2	1153.57	1154.28	3494	3503	EKPTKGHHGY	0.161443	10
>tr|A0A6P7SER3|A0A6P7SER3_OCTVU hemocyanin 1-like OS=Octopus vulgaris OX=6645 GN=LOC115212215 PE=4 SV=2	1159.52	1160.26	1438	1448	GGRDPHSMSSL	0.597154	11
>tr|A0A6P7SER3|A0A6P7SER3_OCTVU hemocyanin 1-like OS=Octopus vulgaris OX=6645 GN=LOC115212215 PE=4 SV=2	1159.52	1160.26	4360	4370	GGRDPHSMSSL	0.597154	11
>tr|A0A6P7SER3|A0A6P7SER3_OCTVU hemocyanin 1-like OS=Octopus vulgaris OX=6645 GN=LOC115212215 PE=4 SV=2	1206.64	1207.38	826	836	TPGKKESDVVF	0.151918	11
>tr|A0A6P7SER3|A0A6P7SER3_OCTVU hemocyanin 1-like OS=Octopus vulgaris OX=6645 GN=LOC115212215 PE=4 SV=2	1206.64	1207.38	3748	3758	TPGKKESDVVF	0.151918	11
>tr|A0A6P7SER3|A0A6P7SER3_OCTVU hemocyanin 1-like OS=Octopus vulgaris OX=6645 GN=LOC115212215 PE=4 SV=2	1221.56	1222.37	1302	1312	QCPNKDGSKVY	0.35103	11
>tr|A0A6P7SER3|A0A6P7SER3_OCTVU hemocyanin 1-like OS=Octopus vulgaris OX=6645 GN=LOC115212215 PE=4 SV=2	1221.56	1222.37	4224	4234	QCPNKDGSKVY	0.35103	11
>tr|A0A6P7SER3|A0A6P7SER3_OCTVU hemocyanin 1-like OS=Octopus vulgaris OX=6645 GN=LOC115212215 PE=4 SV=2	1238.58	1239.4	1302	1312	QCPNKDGSKVY	0.35103	11
>tr|A0A6P7SER3|A0A6P7SER3_OCTVU hemocyanin 1-like OS=Octopus vulgaris OX=6645 GN=LOC115212215 PE=4 SV=2	1238.58	1239.4	4224	4234	QCPNKDGSKVY	0.35103	11
>tr|A0A6P7SER3|A0A6P7SER3_OCTVU hemocyanin 1-like OS=Octopus vulgaris OX=6645 GN=LOC115212215 PE=4 SV=2	1261.62	1262.44	296	305	MKEHQQHPRA	0.150983	10
>tr|A0A6P7SER3|A0A6P7SER3_OCTVU hemocyanin 1-like OS=Octopus vulgaris OX=6645 GN=LOC115212215 PE=4 SV=2	1277.62	1278.44	296	305	MKEHQQHPRA	0.150983	10
>tr|A0A6P7SER3|A0A6P7SER3_OCTVU hemocyanin 1-like OS=Octopus vulgaris OX=6645 GN=LOC115212215 PE=4 SV=2	1281.64	1282.41	2382	2391	HKHQNTDRVF	0.233295	10
>tr|A0A6P7SER3|A0A6P7SER3_OCTVU hemocyanin 1-like OS=Octopus vulgaris OX=6645 GN=LOC115212215 PE=4 SV=2	1300.69	1301.46	5304	5313	HKRQNTDRVF	0.193177	10
>tr|A0A6P7SER3|A0A6P7SER3_OCTVU hemocyanin 1-like OS=Octopus vulgaris OX=6645 GN=LOC115212215 PE=4 SV=2	1317.56	1318.48	1576	1587	CVPTSKHEENCA	0.191903	12
>tr|A0A6P7SER3|A0A6P7SER3_OCTVU hemocyanin 1-like OS=Octopus vulgaris OX=6645 GN=LOC115212215 PE=4 SV=2	1317.56	1318.48	4498	4509	CVPTSKHEENCA	0.191903	12
>tr|A0A6P7SER3|A0A6P7SER3_OCTVU hemocyanin 1-like OS=Octopus vulgaris OX=6645 GN=LOC115212215 PE=4 SV=2	1319.76	1320.62	1137	1146	NRRRMKGRVF	0.362318	10
>tr|A0A6P7SER3|A0A6P7SER3_OCTVU hemocyanin 1-like OS=Octopus vulgaris OX=6645 GN=LOC115212215 PE=4 SV=2	1319.76	1320.62	4059	4068	NRRRMKGRVF	0.362318	10
>tr|A0A6P7SER3|A0A6P7SER3_OCTVU hemocyanin 1-like OS=Octopus vulgaris OX=6645 GN=LOC115212215 PE=4 SV=2	1331.61	1332.45	2165	2176	EDSMRRHGSSVA	0.133332	12
>tr|A0A6P7SER3|A0A6P7SER3_OCTVU hemocyanin 1-like OS=Octopus vulgaris OX=6645 GN=LOC115212215 PE=4 SV=2	1331.61	1332.45	5087	5098	EDSMRRHGSSVA	0.133332	12
>tr|A0A6P7SER3|A0A6P7SER3_OCTVU hemocyanin 1-like OS=Octopus vulgaris OX=6645 GN=LOC115212215 PE=4 SV=2	1335.75	1336.62	1137	1146	NRRRMKGRVF	0.362318	10
>tr|A0A6P7SER3|A0A6P7SER3_OCTVU hemocyanin 1-like OS=Octopus vulgaris OX=6645 GN=LOC115212215 PE=4 SV=2	1335.75	1336.62	4059	4068	NRRRMKGRVF	0.362318	10
>tr|A0A6P7SER3|A0A6P7SER3_OCTVU hemocyanin 1-like OS=Octopus vulgaris OX=6645 GN=LOC115212215 PE=4 SV=2	1347.61	1348.45	2165	2176	EDSMRRHGSSVA	0.133332	12
>tr|A0A6P7SER3|A0A6P7SER3_OCTVU hemocyanin 1-like OS=Octopus vulgaris OX=6645 GN=LOC115212215 PE=4 SV=2	1347.61	1348.45	5087	5098	EDSMRRHGSSVA	0.133332	12
>tr|A0A6P7SER3|A0A6P7SER3_OCTVU hemocyanin 1-like OS=Octopus vulgaris OX=6645 GN=LOC115212215 PE=4 SV=2	1379.7	1380.52	1973	1982	RHQREHDRVF	0.172123	10
>tr|A0A6P7SER3|A0A6P7SER3_OCTVU hemocyanin 1-like OS=Octopus vulgaris OX=6645 GN=LOC115212215 PE=4 SV=2	1379.7	1380.52	4895	4904	RHQREHDRVF	0.172123	10
>tr|A0A6P7SER3|A0A6P7SER3_OCTVU hemocyanin 1-like OS=Octopus vulgaris OX=6645 GN=LOC115212215 PE=4 SV=2	1390.52	1391.49	2001	2013	CVEGGECHEGSHF	0.467392	13
>tr|A0A6P7SER3|A0A6P7SER3_OCTVU hemocyanin 1-like OS=Octopus vulgaris OX=6645 GN=LOC115212215 PE=4 SV=2	1398.7	1399.51	1389	1400	NSETNRDPQPKL	0.167464	12
>tr|A0A6P7SER3|A0A6P7SER3_OCTVU hemocyanin 1-like OS=Octopus vulgaris OX=6645 GN=LOC115212215 PE=4 SV=2	1412.75	1413.58	4311	4322	NSETKRDPQPKL	0.195449	12
>tr|A0A6P7SER3|A0A6P7SER3_OCTVU hemocyanin 1-like OS=Octopus vulgaris OX=6645 GN=LOC115212215 PE=4 SV=2	1418.7	1419.55	2112	2123	TRVKEDKSDHGF	0.116447	12
>tr|A0A6P7SER3|A0A6P7SER3_OCTVU hemocyanin 1-like OS=Octopus vulgaris OX=6645 GN=LOC115212215 PE=4 SV=2	1418.7	1419.55	5034	5045	TRVKEDKSDHGF	0.116447	12
>tr|A0A6P7SER3|A0A6P7SER3_OCTVU hemocyanin 1-like OS=Octopus vulgaris OX=6645 GN=LOC115212215 PE=4 SV=2	1426.71	1427.63	1695	1706	KRMQKDKSSDGF	0.194358	12
>tr|A0A6P7SER3|A0A6P7SER3_OCTVU hemocyanin 1-like OS=Octopus vulgaris OX=6645 GN=LOC115212215 PE=4 SV=2	1426.71	1427.63	4617	4628	KRMQKDKSSDGF	0.194358	12
>tr|A0A6P7SER3|A0A6P7SER3_OCTVU hemocyanin 1-like OS=Octopus vulgaris OX=6645 GN=LOC115212215 PE=4 SV=2	1442.71	1443.63	1695	1706	KRMQKDKSSDGF	0.194358	12
>tr|A0A6P7SER3|A0A6P7SER3_OCTVU hemocyanin 1-like OS=Octopus vulgaris OX=6645 GN=LOC115212215 PE=4 SV=2	1442.71	1443.63	4617	4628	KRMQKDKSSDGF	0.194358	12
>tr|A0A6P7SER3|A0A6P7SER3_OCTVU hemocyanin 1-like OS=Octopus vulgaris OX=6645 GN=LOC115212215 PE=4 SV=2	1462.54	1463.55	4923	4935	CVEEGECHEGSHF	0.406487	13
>tr|A0A6P7SER3|A0A6P7SER3_OCTVU hemocyanin 1-like OS=Octopus vulgaris OX=6645 GN=LOC115212215 PE=4 SV=2	1518.7	1519.69	1094	1106	NVDSMTREHSVPF	0.15307	13
>tr|A0A6P7SER3|A0A6P7SER3_OCTVU hemocyanin 1-like OS=Octopus vulgaris OX=6645 GN=LOC115212215 PE=4 SV=2	1518.7	1519.69	4016	4028	NVDSMTREHSVPF	0.15307	13
>tr|A0A6P7SER3|A0A6P7SER3_OCTVU hemocyanin 1-like OS=Octopus vulgaris OX=6645 GN=LOC115212215 PE=4 SV=2	1534.63	1535.7	2130	2143	HGSTMCPSPDDPKY	0.271473	14
>tr|A0A6P7SER3|A0A6P7SER3_OCTVU hemocyanin 1-like OS=Octopus vulgaris OX=6645 GN=LOC115212215 PE=4 SV=2	1534.63	1535.7	5052	5065	HGSTMCPSPDDPKY	0.271473	14
>tr|A0A6P7SER3|A0A6P7SER3_OCTVU hemocyanin 1-like OS=Octopus vulgaris OX=6645 GN=LOC115212215 PE=4 SV=2	1534.7	1535.69	1094	1106	NVDSMTREHSVPF	0.15307	13
>tr|A0A6P7SER3|A0A6P7SER3_OCTVU hemocyanin 1-like OS=Octopus vulgaris OX=6645 GN=LOC115212215 PE=4 SV=2	1534.7	1535.69	4016	4028	NVDSMTREHSVPF	0.15307	13
>tr|A0A6P7SER3|A0A6P7SER3_OCTVU hemocyanin 1-like OS=Octopus vulgaris OX=6645 GN=LOC115212215 PE=4 SV=2	1550.62	1551.7	2130	2143	HGSTMCPSPDDPKY	0.271473	14
>tr|A0A6P7SER3|A0A6P7SER3_OCTVU hemocyanin 1-like OS=Octopus vulgaris OX=6645 GN=LOC115212215 PE=4 SV=2	1550.62	1551.7	5052	5065	HGSTMCPSPDDPKY	0.271473	14
>tr|A0A6P7SER3|A0A6P7SER3_OCTVU hemocyanin 1-like OS=Octopus vulgaris OX=6645 GN=LOC115212215 PE=4 SV=2	1574.7	1575.7	1805	1817	SEDTMTKREVSEY	0.0452612	13
>tr|A0A6P7SER3|A0A6P7SER3_OCTVU hemocyanin 1-like OS=Octopus vulgaris OX=6645 GN=LOC115212215 PE=4 SV=2	1574.7	1575.7	4727	4739	SEDTMTKREVSEY	0.0452612	13
>tr|A0A6P7SER3|A0A6P7SER3_OCTVU hemocyanin 1-like OS=Octopus vulgaris OX=6645 GN=LOC115212215 PE=4 SV=2	1590.7	1591.7	1805	1817	SEDTMTKREVSEY	0.0452612	13
>tr|A0A6P7SER3|A0A6P7SER3_OCTVU hemocyanin 1-like OS=Octopus vulgaris OX=6645 GN=LOC115212215 PE=4 SV=2	1590.7	1591.7	4727	4739	SEDTMTKREVSEY	0.0452612	13
>tr|A0A6P7SER3|A0A6P7SER3_OCTVU hemocyanin 1-like OS=Octopus vulgaris OX=6645 GN=LOC115212215 PE=4 SV=2	2344.02	2345.55	324	344	VCVPTDDKRHSDNCNNHVGSF	0.402536	21
>tr|A0A6P7SER3|A0A6P7SER3_OCTVU hemocyanin 1-like OS=Octopus vulgaris OX=6645 GN=LOC115212215 PE=4 SV=2	2344.02	2345.55	3246	3266	VCVPTDDKRHSDNCNNHVGSF	0.402536	21
>tr|A0A6P7SDC4|A0A6P7SDC4_OCTVU hemocyanin G-type, units Oda to Odg OS=Octopus vulgaris OX=6645 GN=LOC115211670 PE=4 SV=2	805.416	805.871	2647	2653	NKDTTRA	0.0907527	7
>tr|A0A6P7SDC4|A0A6P7SDC4_OCTVU hemocyanin G-type, units Oda to Odg OS=Octopus vulgaris OX=6645 GN=LOC115211670 PE=4 SV=2	806.314	806.877	2854	2860	GGEHEMF	0.570008	7
>tr|A0A6P7SDC4|A0A6P7SDC4_OCTVU hemocyanin G-type, units Oda to Odg OS=Octopus vulgaris OX=6645 GN=LOC115211670 PE=4 SV=2	809.415	809.903	118	124	TQPVDHL	0.186904	7
>tr|A0A6P7SDC4|A0A6P7SDC4_OCTVU hemocyanin G-type, units Oda to Odg OS=Octopus vulgaris OX=6645 GN=LOC115211670 PE=4 SV=2	810.458	810.937	2330	2335	QEHRKL	0.199384	6
>tr|A0A6P7SDC4|A0A6P7SDC4_OCTVU hemocyanin G-type, units Oda to Odg OS=Octopus vulgaris OX=6645 GN=LOC115211670 PE=4 SV=2	820.387	820.945	2598	2604	VKQMEDA	0.0663594	7
>tr|A0A6P7SDC4|A0A6P7SDC4_OCTVU hemocyanin G-type, units Oda to Odg OS=Octopus vulgaris OX=6645 GN=LOC115211670 PE=4 SV=2	822.309	822.877	2854	2860	GGEHEMF	0.570008	7
>tr|A0A6P7SDC4|A0A6P7SDC4_OCTVU hemocyanin G-type, units Oda to Odg OS=Octopus vulgaris OX=6645 GN=LOC115211670 PE=4 SV=2	832.489	832.981	27	33	RKSVETL	0.0698136	7
>tr|A0A6P7SDC4|A0A6P7SDC4_OCTVU hemocyanin G-type, units Oda to Odg OS=Octopus vulgaris OX=6645 GN=LOC115211670 PE=4 SV=2	833.452	833.968	419	425	PRPTVTY	0.206868	7
>tr|A0A6P7SDC4|A0A6P7SDC4_OCTVU hemocyanin G-type, units Oda to Odg OS=Octopus vulgaris OX=6645 GN=LOC115211670 PE=4 SV=2	835.434	836.004	1219	1225	TKQMKEA	0.0483105	7
>tr|A0A6P7SDC4|A0A6P7SDC4_OCTVU hemocyanin G-type, units Oda to Odg OS=Octopus vulgaris OX=6645 GN=LOC115211670 PE=4 SV=2	836.382	836.945	2598	2604	VKQMEDA	0.0663594	7
>tr|A0A6P7SDC4|A0A6P7SDC4_OCTVU hemocyanin G-type, units Oda to Odg OS=Octopus vulgaris OX=6645 GN=LOC115211670 PE=4 SV=2	837.458	837.96	684	690	SEVHRPL	0.307476	7
>tr|A0A6P7SDC4|A0A6P7SDC4_OCTVU hemocyanin G-type, units Oda to Odg OS=Octopus vulgaris OX=6645 GN=LOC115211670 PE=4 SV=2	844.525	845.036	1649	1655	RVKTEVI	0.0304109	7
>tr|A0A6P7SDC4|A0A6P7SDC4_OCTVU hemocyanin G-type, units Oda to Odg OS=Octopus vulgaris OX=6645 GN=LOC115211670 PE=4 SV=2	848.429	849.002	731	738	GGMSVREL	0.331735	8
>tr|A0A6P7SDC4|A0A6P7SDC4_OCTVU hemocyanin G-type, units Oda to Odg OS=Octopus vulgaris OX=6645 GN=LOC115211670 PE=4 SV=2	851.429	852.003	1219	1225	TKQMKEA	0.0483105	7
>tr|A0A6P7SDC4|A0A6P7SDC4_OCTVU hemocyanin G-type, units Oda to Odg OS=Octopus vulgaris OX=6645 GN=LOC115211670 PE=4 SV=2	853.376	853.975	1958	1964	SKPEDMF	0.704257	7
>tr|A0A6P7SDC4|A0A6P7SDC4_OCTVU hemocyanin G-type, units Oda to Odg OS=Octopus vulgaris OX=6645 GN=LOC115211670 PE=4 SV=2	859.474	859.966	2112	2118	RRNVDSL	0.131134	7
>tr|A0A6P7SDC4|A0A6P7SDC4_OCTVU hemocyanin G-type, units Oda to Odg OS=Octopus vulgaris OX=6645 GN=LOC115211670 PE=4 SV=2	860.445	861.06	1512	1518	NVPMRPF	0.853557	7
>tr|A0A6P7SDC4|A0A6P7SDC4_OCTVU hemocyanin G-type, units Oda to Odg OS=Octopus vulgaris OX=6645 GN=LOC115211670 PE=4 SV=2	860.472	860.989	2489	2496	ETVDGKVL	0.0771665	8
>tr|A0A6P7SDC4|A0A6P7SDC4_OCTVU hemocyanin G-type, units Oda to Odg OS=Octopus vulgaris OX=6645 GN=LOC115211670 PE=4 SV=2	862.46	863.076	1100	1106	RKPMSPF	0.808003	7
>tr|A0A6P7SDC4|A0A6P7SDC4_OCTVU hemocyanin G-type, units Oda to Odg OS=Octopus vulgaris OX=6645 GN=LOC115211670 PE=4 SV=2	864.356	864.958	2036	2043	GGSTEMPW	0.676037	8
>tr|A0A6P7SDC4|A0A6P7SDC4_OCTVU hemocyanin G-type, units Oda to Odg OS=Octopus vulgaris OX=6645 GN=LOC115211670 PE=4 SV=2	864.424	865.002	731	738	GGMSVREL	0.331735	8
>tr|A0A6P7SDC4|A0A6P7SDC4_OCTVU hemocyanin G-type, units Oda to Odg OS=Octopus vulgaris OX=6645 GN=LOC115211670 PE=4 SV=2	869.371	869.974	1958	1964	SKPEDMF	0.704257	7
>tr|A0A6P7SDC4|A0A6P7SDC4_OCTVU hemocyanin G-type, units Oda to Odg OS=Octopus vulgaris OX=6645 GN=LOC115211670 PE=4 SV=2	872.393	872.981	134	141	MDPSSHKA	0.234593	8
>tr|A0A6P7SDC4|A0A6P7SDC4_OCTVU hemocyanin G-type, units Oda to Odg OS=Octopus vulgaris OX=6645 GN=LOC115211670 PE=4 SV=2	876.44	877.059	1512	1518	NVPMRPF	0.853557	7
>tr|A0A6P7SDC4|A0A6P7SDC4_OCTVU hemocyanin G-type, units Oda to Odg OS=Octopus vulgaris OX=6645 GN=LOC115211670 PE=4 SV=2	878.455	879.075	1100	1106	RKPMSPF	0.808003	7
>tr|A0A6P7SDC4|A0A6P7SDC4_OCTVU hemocyanin G-type, units Oda to Odg OS=Octopus vulgaris OX=6645 GN=LOC115211670 PE=4 SV=2	880.351	880.957	2036	2043	GGSTEMPW	0.676037	8
>tr|A0A6P7SDC4|A0A6P7SDC4_OCTVU hemocyanin G-type, units Oda to Odg OS=Octopus vulgaris OX=6645 GN=LOC115211670 PE=4 SV=2	885.429	886.067	263	269	HKPMEPF	0.734071	7
>tr|A0A6P7SDC4|A0A6P7SDC4_OCTVU hemocyanin G-type, units Oda to Odg OS=Octopus vulgaris OX=6645 GN=LOC115211670 PE=4 SV=2	888.388	888.98	134	141	MDPSSHKA	0.234593	8
>tr|A0A6P7SDC4|A0A6P7SDC4_OCTVU hemocyanin G-type, units Oda to Odg OS=Octopus vulgaris OX=6645 GN=LOC115211670 PE=4 SV=2	890.412	890.936	700	706	NNNKHTY	0.121699	7
>tr|A0A6P7SDC4|A0A6P7SDC4_OCTVU hemocyanin G-type, units Oda to Odg OS=Octopus vulgaris OX=6645 GN=LOC115211670 PE=4 SV=2	892.351	892.968	1616	1623	GGESEMPW	0.555253	8
>tr|A0A6P7SDC4|A0A6P7SDC4_OCTVU hemocyanin G-type, units Oda to Odg OS=Octopus vulgaris OX=6645 GN=LOC115211670 PE=4 SV=2	901.424	902.066	263	269	HKPMEPF	0.734071	7
>tr|A0A6P7SDC4|A0A6P7SDC4_OCTVU hemocyanin G-type, units Oda to Odg OS=Octopus vulgaris OX=6645 GN=LOC115211670 PE=4 SV=2	905.346	905.967	2444	2451	GGDNEMPW	0.778264	8
>tr|A0A6P7SDC4|A0A6P7SDC4_OCTVU hemocyanin G-type, units Oda to Odg OS=Octopus vulgaris OX=6645 GN=LOC115211670 PE=4 SV=2	908.346	908.968	1616	1623	GGESEMPW	0.555253	8
>tr|A0A6P7SDC4|A0A6P7SDC4_OCTVU hemocyanin G-type, units Oda to Odg OS=Octopus vulgaris OX=6645 GN=LOC115211670 PE=4 SV=2	913.416	913.971	2813	2819	QHEDRVF	0.372931	7
>tr|A0A6P7SDC4|A0A6P7SDC4_OCTVU hemocyanin G-type, units Oda to Odg OS=Octopus vulgaris OX=6645 GN=LOC115211670 PE=4 SV=2	916.398	917.037	367	374	GGVHEMTW	0.479901	8
>tr|A0A6P7SDC4|A0A6P7SDC4_OCTVU hemocyanin G-type, units Oda to Odg OS=Octopus vulgaris OX=6645 GN=LOC115211670 PE=4 SV=2	921.341	921.966	2444	2451	GGDNEMPW	0.778264	8
>tr|A0A6P7SDC4|A0A6P7SDC4_OCTVU hemocyanin G-type, units Oda to Odg OS=Octopus vulgaris OX=6645 GN=LOC115211670 PE=4 SV=2	923.393	924.026	786	793	GGSKEMEW	0.438552	8
>tr|A0A6P7SDC4|A0A6P7SDC4_OCTVU hemocyanin G-type, units Oda to Odg OS=Octopus vulgaris OX=6645 GN=LOC115211670 PE=4 SV=2	930.443	931.002	2813	2819	QHEDRVF	0.372931	7
>tr|A0A6P7SDC4|A0A6P7SDC4_OCTVU hemocyanin G-type, units Oda to Odg OS=Octopus vulgaris OX=6645 GN=LOC115211670 PE=4 SV=2	932.393	933.037	367	374	GGVHEMTW	0.479901	8
>tr|A0A6P7SDC4|A0A6P7SDC4_OCTVU hemocyanin G-type, units Oda to Odg OS=Octopus vulgaris OX=6645 GN=LOC115211670 PE=4 SV=2	935.458	936.018	168	176	QSSKGGKNF	0.44303	9
>tr|A0A6P7SDC4|A0A6P7SDC4_OCTVU hemocyanin G-type, units Oda to Odg OS=Octopus vulgaris OX=6645 GN=LOC115211670 PE=4 SV=2	939.388	940.025	786	793	GGSKEMEW	0.438552	8
>tr|A0A6P7SDC4|A0A6P7SDC4_OCTVU hemocyanin G-type, units Oda to Odg OS=Octopus vulgaris OX=6645 GN=LOC115211670 PE=4 SV=2	952.485	953.049	168	176	QSSKGGKNF	0.44303	9
>tr|A0A6P7SDC4|A0A6P7SDC4_OCTVU hemocyanin G-type, units Oda to Odg OS=Octopus vulgaris OX=6645 GN=LOC115211670 PE=4 SV=2	961.525	962.166	2528	2535	MRKNVNSL	0.12638	8
>tr|A0A6P7SDC4|A0A6P7SDC4_OCTVU hemocyanin G-type, units Oda to Odg OS=Octopus vulgaris OX=6645 GN=LOC115211670 PE=4 SV=2	977.491	978.062	1903	1910	HHSNVDRL	0.329543	8
>tr|A0A6P7SDC4|A0A6P7SDC4_OCTVU hemocyanin G-type, units Oda to Odg OS=Octopus vulgaris OX=6645 GN=LOC115211670 PE=4 SV=2	977.52	978.165	2528	2535	MRKNVNSL	0.12638	8
>tr|A0A6P7SDC4|A0A6P7SDC4_OCTVU hemocyanin G-type, units Oda to Odg OS=Octopus vulgaris OX=6645 GN=LOC115211670 PE=4 SV=2	979.47	980.034	2724	2731	HHSNTDRI	0.233481	8
>tr|A0A6P7SDC4|A0A6P7SDC4_OCTVU hemocyanin G-type, units Oda to Odg OS=Octopus vulgaris OX=6645 GN=LOC115211670 PE=4 SV=2	984.374	985.198	501	509	CCVHGMSTF	0.712209	9
>tr|A0A6P7SDC4|A0A6P7SDC4_OCTVU hemocyanin G-type, units Oda to Odg OS=Octopus vulgaris OX=6645 GN=LOC115211670 PE=4 SV=2	985.36	986.071	2429	2437	CKDTTCEDA	0.108737	9
>tr|A0A6P7SDC4|A0A6P7SDC4_OCTVU hemocyanin G-type, units Oda to Odg OS=Octopus vulgaris OX=6645 GN=LOC115211670 PE=4 SV=2	987.427	988.001	454	461	TTEEEHEL	0.0266805	8
>tr|A0A6P7SDC4|A0A6P7SDC4_OCTVU hemocyanin G-type, units Oda to Odg OS=Octopus vulgaris OX=6645 GN=LOC115211670 PE=4 SV=2	991.507	992.089	655	662	HHSQVDRL	0.282885	8
>tr|A0A6P7SDC4|A0A6P7SDC4_OCTVU hemocyanin G-type, units Oda to Odg OS=Octopus vulgaris OX=6645 GN=LOC115211670 PE=4 SV=2	991.507	992.089	231	238	HHSNVERL	0.275042	8
>tr|A0A6P7SDC4|A0A6P7SDC4_OCTVU hemocyanin G-type, units Oda to Odg OS=Octopus vulgaris OX=6645 GN=LOC115211670 PE=4 SV=2	993.438	994.181	73	82	PDGSTVVCCL	0.659001	10
>tr|A0A6P7SDC4|A0A6P7SDC4_OCTVU hemocyanin G-type, units Oda to Odg OS=Octopus vulgaris OX=6645 GN=LOC115211670 PE=4 SV=2	994.489	995.155	2315	2322	HHSMVDRL	0.457398	8
>tr|A0A6P7SDC4|A0A6P7SDC4_OCTVU hemocyanin G-type, units Oda to Odg OS=Octopus vulgaris OX=6645 GN=LOC115211670 PE=4 SV=2	1000.37	1001.2	501	509	CCVHGMSTF	0.712209	9
>tr|A0A6P7SDC4|A0A6P7SDC4_OCTVU hemocyanin G-type, units Oda to Odg OS=Octopus vulgaris OX=6645 GN=LOC115211670 PE=4 SV=2	1002.4	1003.15	2838	2846	CTKNGECTF	0.345601	9
>tr|A0A6P7SDC4|A0A6P7SDC4_OCTVU hemocyanin G-type, units Oda to Odg OS=Octopus vulgaris OX=6645 GN=LOC115211670 PE=4 SV=2	1010.48	1011.15	2315	2322	HHSMVDRL	0.457398	8
>tr|A0A6P7SDC4|A0A6P7SDC4_OCTVU hemocyanin G-type, units Oda to Odg OS=Octopus vulgaris OX=6645 GN=LOC115211670 PE=4 SV=2	1013.62	1014.22	1694	1701	VRKNVERL	0.125128	8
>tr|A0A6P7SDC4|A0A6P7SDC4_OCTVU hemocyanin G-type, units Oda to Odg OS=Octopus vulgaris OX=6645 GN=LOC115211670 PE=4 SV=2	1017.46	1018.08	1531	1539	THSTPNDVF	0.22504	9
>tr|A0A6P7SDC4|A0A6P7SDC4_OCTVU hemocyanin G-type, units Oda to Odg OS=Octopus vulgaris OX=6645 GN=LOC115211670 PE=4 SV=2	1024.42	1025.02	884	892	EDDKSPNGY	0.246535	9
>tr|A0A6P7SDC4|A0A6P7SDC4_OCTVU hemocyanin G-type, units Oda to Odg OS=Octopus vulgaris OX=6645 GN=LOC115211670 PE=4 SV=2	1025.4	1026.25	2582	2590	CCQHGMVTF	0.745641	9
>tr|A0A6P7SDC4|A0A6P7SDC4_OCTVU hemocyanin G-type, units Oda to Odg OS=Octopus vulgaris OX=6645 GN=LOC115211670 PE=4 SV=2	1027.48	1028.07	1685	1693	KHEESNGNL	0.114054	9
>tr|A0A6P7SDC4|A0A6P7SDC4_OCTVU hemocyanin G-type, units Oda to Odg OS=Octopus vulgaris OX=6645 GN=LOC115211670 PE=4 SV=2	1041.4	1042.25	2582	2590	CCQHGMVTF	0.745641	9
>tr|A0A6P7SDC4|A0A6P7SDC4_OCTVU hemocyanin G-type, units Oda to Odg OS=Octopus vulgaris OX=6645 GN=LOC115211670 PE=4 SV=2	1059.58	1060.25	559	567	TKEVKPNPF	0.199075	9
>tr|A0A6P7SDC4|A0A6P7SDC4_OCTVU hemocyanin G-type, units Oda to Odg OS=Octopus vulgaris OX=6645 GN=LOC115211670 PE=4 SV=2	1075.6	1076.21	860	868	RSRRDVSSL	0.113563	9
>tr|A0A6P7SDC4|A0A6P7SDC4_OCTVU hemocyanin G-type, units Oda to Odg OS=Octopus vulgaris OX=6645 GN=LOC115211670 PE=4 SV=2	1077.52	1078.17	2630	2638	VTEEKNNPF	0.108005	9
>tr|A0A6P7SDC4|A0A6P7SDC4_OCTVU hemocyanin G-type, units Oda to Odg OS=Octopus vulgaris OX=6645 GN=LOC115211670 PE=4 SV=2	1126.53	1127.27	1301	1309	KDMKNDGRY	0.25432	9
>tr|A0A6P7SDC4|A0A6P7SDC4_OCTVU hemocyanin G-type, units Oda to Odg OS=Octopus vulgaris OX=6645 GN=LOC115211670 PE=4 SV=2	1137.51	1138.18	2660	2669	DDPEKGDKSF	0.311113	10
>tr|A0A6P7SDC4|A0A6P7SDC4_OCTVU hemocyanin G-type, units Oda to Odg OS=Octopus vulgaris OX=6645 GN=LOC115211670 PE=4 SV=2	1142.53	1143.27	1301	1309	KDMKNDGRY	0.25432	9
>tr|A0A6P7SDC4|A0A6P7SDC4_OCTVU hemocyanin G-type, units Oda to Odg OS=Octopus vulgaris OX=6645 GN=LOC115211670 PE=4 SV=2	1143.52	1144.26	1457	1467	GGRDPHSMSSL	0.597154	11
>tr|A0A6P7SDC4|A0A6P7SDC4_OCTVU hemocyanin G-type, units Oda to Odg OS=Octopus vulgaris OX=6645 GN=LOC115211670 PE=4 SV=2	1149.55	1150.25	1067	1075	HHSNVDRVW	0.324079	9
>tr|A0A6P7SDC4|A0A6P7SDC4_OCTVU hemocyanin G-type, units Oda to Odg OS=Octopus vulgaris OX=6645 GN=LOC115211670 PE=4 SV=2	1153.57	1154.28	591	600	EKPTKGHHGY	0.161443	10
>tr|A0A6P7SDC4|A0A6P7SDC4_OCTVU hemocyanin G-type, units Oda to Odg OS=Octopus vulgaris OX=6645 GN=LOC115211670 PE=4 SV=2	1159.52	1160.26	1457	1467	GGRDPHSMSSL	0.597154	11
>tr|A0A6P7SDC4|A0A6P7SDC4_OCTVU hemocyanin G-type, units Oda to Odg OS=Octopus vulgaris OX=6645 GN=LOC115211670 PE=4 SV=2	1206.64	1207.38	845	855	TPGKKESDVVF	0.151918	11
>tr|A0A6P7SDC4|A0A6P7SDC4_OCTVU hemocyanin G-type, units Oda to Odg OS=Octopus vulgaris OX=6645 GN=LOC115211670 PE=4 SV=2	1221.56	1222.37	1321	1331	QCPNKDGSKVY	0.35103	11
>tr|A0A6P7SDC4|A0A6P7SDC4_OCTVU hemocyanin G-type, units Oda to Odg OS=Octopus vulgaris OX=6645 GN=LOC115211670 PE=4 SV=2	1238.58	1239.4	1321	1331	QCPNKDGSKVY	0.35103	11
>tr|A0A6P7SDC4|A0A6P7SDC4_OCTVU hemocyanin G-type, units Oda to Odg OS=Octopus vulgaris OX=6645 GN=LOC115211670 PE=4 SV=2	1261.62	1262.44	315	324	MKEHQQHPRA	0.150983	10
>tr|A0A6P7SDC4|A0A6P7SDC4_OCTVU hemocyanin G-type, units Oda to Odg OS=Octopus vulgaris OX=6645 GN=LOC115211670 PE=4 SV=2	1273.68	1274.43	2401	2410	HKRQSTDRVF	0.212864	10
>tr|A0A6P7SDC4|A0A6P7SDC4_OCTVU hemocyanin G-type, units Oda to Odg OS=Octopus vulgaris OX=6645 GN=LOC115211670 PE=4 SV=2	1277.62	1278.44	315	324	MKEHQQHPRA	0.150983	10
>tr|A0A6P7SDC4|A0A6P7SDC4_OCTVU hemocyanin G-type, units Oda to Odg OS=Octopus vulgaris OX=6645 GN=LOC115211670 PE=4 SV=2	1317.56	1318.48	1595	1606	CVPTSKHEENCA	0.191903	12
>tr|A0A6P7SDC4|A0A6P7SDC4_OCTVU hemocyanin G-type, units Oda to Odg OS=Octopus vulgaris OX=6645 GN=LOC115211670 PE=4 SV=2	1319.76	1320.62	1156	1165	NRRRMKGRVF	0.362318	10
>tr|A0A6P7SDC4|A0A6P7SDC4_OCTVU hemocyanin G-type, units Oda to Odg OS=Octopus vulgaris OX=6645 GN=LOC115211670 PE=4 SV=2	1331.61	1332.45	2184	2195	EDSMRRHGSSVA	0.133332	12
>tr|A0A6P7SDC4|A0A6P7SDC4_OCTVU hemocyanin G-type, units Oda to Odg OS=Octopus vulgaris OX=6645 GN=LOC115211670 PE=4 SV=2	1335.75	1336.62	1156	1165	NRRRMKGRVF	0.362318	10
>tr|A0A6P7SDC4|A0A6P7SDC4_OCTVU hemocyanin G-type, units Oda to Odg OS=Octopus vulgaris OX=6645 GN=LOC115211670 PE=4 SV=2	1347.61	1348.45	2184	2195	EDSMRRHGSSVA	0.133332	12
>tr|A0A6P7SDC4|A0A6P7SDC4_OCTVU hemocyanin G-type, units Oda to Odg OS=Octopus vulgaris OX=6645 GN=LOC115211670 PE=4 SV=2	1379.7	1380.52	1992	2001	RHQREHDRVF	0.172123	10
>tr|A0A6P7SDC4|A0A6P7SDC4_OCTVU hemocyanin G-type, units Oda to Odg OS=Octopus vulgaris OX=6645 GN=LOC115211670 PE=4 SV=2	1398.7	1399.51	1408	1419	NSETNRDPQPKL	0.167464	12
>tr|A0A6P7SDC4|A0A6P7SDC4_OCTVU hemocyanin G-type, units Oda to Odg OS=Octopus vulgaris OX=6645 GN=LOC115211670 PE=4 SV=2	1418.7	1419.55	2131	2142	TRVKEDKSDHGF	0.116447	12
>tr|A0A6P7SDC4|A0A6P7SDC4_OCTVU hemocyanin G-type, units Oda to Odg OS=Octopus vulgaris OX=6645 GN=LOC115211670 PE=4 SV=2	1426.71	1427.63	1714	1725	KRMQKDKSSDGF	0.194358	12
>tr|A0A6P7SDC4|A0A6P7SDC4_OCTVU hemocyanin G-type, units Oda to Odg OS=Octopus vulgaris OX=6645 GN=LOC115211670 PE=4 SV=2	1442.71	1443.63	1714	1725	KRMQKDKSSDGF	0.194358	12
>tr|A0A6P7SDC4|A0A6P7SDC4_OCTVU hemocyanin G-type, units Oda to Odg OS=Octopus vulgaris OX=6645 GN=LOC115211670 PE=4 SV=2	1462.54	1463.55	2020	2032	CVEEGECHEGSHF	0.406487	13
>tr|A0A6P7SDC4|A0A6P7SDC4_OCTVU hemocyanin G-type, units Oda to Odg OS=Octopus vulgaris OX=6645 GN=LOC115211670 PE=4 SV=2	1518.7	1519.69	1113	1125	NVDSMTREHSVPF	0.15307	13
>tr|A0A6P7SDC4|A0A6P7SDC4_OCTVU hemocyanin G-type, units Oda to Odg OS=Octopus vulgaris OX=6645 GN=LOC115211670 PE=4 SV=2	1534.63	1535.7	2149	2162	HGSTMCPSPDDPKY	0.271473	14
>tr|A0A6P7SDC4|A0A6P7SDC4_OCTVU hemocyanin G-type, units Oda to Odg OS=Octopus vulgaris OX=6645 GN=LOC115211670 PE=4 SV=2	1534.7	1535.69	1113	1125	NVDSMTREHSVPF	0.15307	13
>tr|A0A6P7SDC4|A0A6P7SDC4_OCTVU hemocyanin G-type, units Oda to Odg OS=Octopus vulgaris OX=6645 GN=LOC115211670 PE=4 SV=2	1544.83	1545.74	2515	2527	EEEERKQVVKGTL	0.0980367	13
>tr|A0A6P7SDC4|A0A6P7SDC4_OCTVU hemocyanin G-type, units Oda to Odg OS=Octopus vulgaris OX=6645 GN=LOC115211670 PE=4 SV=2	1550.62	1551.7	2149	2162	HGSTMCPSPDDPKY	0.271473	14
>tr|A0A6P7SDC4|A0A6P7SDC4_OCTVU hemocyanin G-type, units Oda to Odg OS=Octopus vulgaris OX=6645 GN=LOC115211670 PE=4 SV=2	1574.7	1575.7	1824	1836	SEDTMTKREVSEY	0.0452612	13
>tr|A0A6P7SDC4|A0A6P7SDC4_OCTVU hemocyanin G-type, units Oda to Odg OS=Octopus vulgaris OX=6645 GN=LOC115211670 PE=4 SV=2	1590.7	1591.7	1824	1836	SEDTMTKREVSEY	0.0452612	13
>tr|A0A6P7SDC4|A0A6P7SDC4_OCTVU hemocyanin G-type, units Oda to Odg OS=Octopus vulgaris OX=6645 GN=LOC115211670 PE=4 SV=2	2042.87	2044.14	346	363	PTDDKRHSDNCNNHVGSF	0.259699	18
>Cluster-58773.162319;orf1 len=2921 frame:3 start:24 end:8786 gi|16596797|gb|AAK28276.2| hemocyanin G-type [Enteroctopus dofleini]	805.416	805.871	2651	2657	NKDTTRA	0.0907527	7
>Cluster-58773.162319;orf1 len=2921 frame:3 start:24 end:8786 gi|16596797|gb|AAK28276.2| hemocyanin G-type [Enteroctopus dofleini]	806.314	806.877	2858	2864	GGEHEMF	0.570008	7
>Cluster-58773.162319;orf1 len=2921 frame:3 start:24 end:8786 gi|16596797|gb|AAK28276.2| hemocyanin G-type [Enteroctopus dofleini]	809.415	809.903	122	128	TQPVDHL	0.186904	7
>Cluster-58773.162319;orf1 len=2921 frame:3 start:24 end:8786 gi|16596797|gb|AAK28276.2| hemocyanin G-type [Enteroctopus dofleini]	810.458	810.937	2334	2339	QEHRKL	0.199384	6
>Cluster-58773.162319;orf1 len=2921 frame:3 start:24 end:8786 gi|16596797|gb|AAK28276.2| hemocyanin G-type [Enteroctopus dofleini]	820.387	820.945	2602	2608	VKQMEDA	0.0663594	7
>Cluster-58773.162319;orf1 len=2921 frame:3 start:24 end:8786 gi|16596797|gb|AAK28276.2| hemocyanin G-type [Enteroctopus dofleini]	822.309	822.877	2858	2864	GGEHEMF	0.570008	7
>Cluster-58773.162319;orf1 len=2921 frame:3 start:24 end:8786 gi|16596797|gb|AAK28276.2| hemocyanin G-type [Enteroctopus dofleini]	832.489	832.981	31	37	RKSVETL	0.0698136	7
>Cluster-58773.162319;orf1 len=2921 frame:3 start:24 end:8786 gi|16596797|gb|AAK28276.2| hemocyanin G-type [Enteroctopus dofleini]	833.452	833.968	423	429	PRPTVTY	0.206868	7
>Cluster-58773.162319;orf1 len=2921 frame:3 start:24 end:8786 gi|16596797|gb|AAK28276.2| hemocyanin G-type [Enteroctopus dofleini]	834.377	834.932	50	56	RVMQDDA	0.112104	7
>Cluster-58773.162319;orf1 len=2921 frame:3 start:24 end:8786 gi|16596797|gb|AAK28276.2| hemocyanin G-type [Enteroctopus dofleini]	835.434	836.004	1223	1229	TKQMKEA	0.0483105	7
>Cluster-58773.162319;orf1 len=2921 frame:3 start:24 end:8786 gi|16596797|gb|AAK28276.2| hemocyanin G-type [Enteroctopus dofleini]	836.382	836.945	2602	2608	VKQMEDA	0.0663594	7
>Cluster-58773.162319;orf1 len=2921 frame:3 start:24 end:8786 gi|16596797|gb|AAK28276.2| hemocyanin G-type [Enteroctopus dofleini]	837.458	837.96	688	694	SEVHRPL	0.307476	7
>Cluster-58773.162319;orf1 len=2921 frame:3 start:24 end:8786 gi|16596797|gb|AAK28276.2| hemocyanin G-type [Enteroctopus dofleini]	848.429	849.002	735	742	GGMSVREL	0.331735	8
>Cluster-58773.162319;orf1 len=2921 frame:3 start:24 end:8786 gi|16596797|gb|AAK28276.2| hemocyanin G-type [Enteroctopus dofleini]	850.372	850.931	50	56	RVMQDDA	0.112104	7
>Cluster-58773.162319;orf1 len=2921 frame:3 start:24 end:8786 gi|16596797|gb|AAK28276.2| hemocyanin G-type [Enteroctopus dofleini]	851.429	852.003	1223	1229	TKQMKEA	0.0483105	7
>Cluster-58773.162319;orf1 len=2921 frame:3 start:24 end:8786 gi|16596797|gb|AAK28276.2| hemocyanin G-type [Enteroctopus dofleini]	853.376	853.975	1962	1968	SKPEDMF	0.704257	7
>Cluster-58773.162319;orf1 len=2921 frame:3 start:24 end:8786 gi|16596797|gb|AAK28276.2| hemocyanin G-type [Enteroctopus dofleini]	859.474	859.966	2116	2122	RRNVDSL	0.131134	7
>Cluster-58773.162319;orf1 len=2921 frame:3 start:24 end:8786 gi|16596797|gb|AAK28276.2| hemocyanin G-type [Enteroctopus dofleini]	860.445	861.06	1516	1522	NVPMRPF	0.853557	7
>Cluster-58773.162319;orf1 len=2921 frame:3 start:24 end:8786 gi|16596797|gb|AAK28276.2| hemocyanin G-type [Enteroctopus dofleini]	860.472	860.989	2493	2500	ETVDGKVL	0.0771665	8
>Cluster-58773.162319;orf1 len=2921 frame:3 start:24 end:8786 gi|16596797|gb|AAK28276.2| hemocyanin G-type [Enteroctopus dofleini]	862.46	863.076	1104	1110	RKPMSPF	0.808003	7
>Cluster-58773.162319;orf1 len=2921 frame:3 start:24 end:8786 gi|16596797|gb|AAK28276.2| hemocyanin G-type [Enteroctopus dofleini]	864.356	864.958	2040	2047	GGSTEMPW	0.676037	8
>Cluster-58773.162319;orf1 len=2921 frame:3 start:24 end:8786 gi|16596797|gb|AAK28276.2| hemocyanin G-type [Enteroctopus dofleini]	864.424	865.002	735	742	GGMSVREL	0.331735	8
>Cluster-58773.162319;orf1 len=2921 frame:3 start:24 end:8786 gi|16596797|gb|AAK28276.2| hemocyanin G-type [Enteroctopus dofleini]	869.371	869.974	1962	1968	SKPEDMF	0.704257	7
>Cluster-58773.162319;orf1 len=2921 frame:3 start:24 end:8786 gi|16596797|gb|AAK28276.2| hemocyanin G-type [Enteroctopus dofleini]	872.393	872.981	138	145	MDPSSHKA	0.234593	8
>Cluster-58773.162319;orf1 len=2921 frame:3 start:24 end:8786 gi|16596797|gb|AAK28276.2| hemocyanin G-type [Enteroctopus dofleini]	876.44	877.059	1516	1522	NVPMRPF	0.853557	7
>Cluster-58773.162319;orf1 len=2921 frame:3 start:24 end:8786 gi|16596797|gb|AAK28276.2| hemocyanin G-type [Enteroctopus dofleini]	878.455	879.075	1104	1110	RKPMSPF	0.808003	7
>Cluster-58773.162319;orf1 len=2921 frame:3 start:24 end:8786 gi|16596797|gb|AAK28276.2| hemocyanin G-type [Enteroctopus dofleini]	880.351	880.957	2040	2047	GGSTEMPW	0.676037	8
>Cluster-58773.162319;orf1 len=2921 frame:3 start:24 end:8786 gi|16596797|gb|AAK28276.2| hemocyanin G-type [Enteroctopus dofleini]	885.429	886.067	267	273	HKPMEPF	0.734071	7
>Cluster-58773.162319;orf1 len=2921 frame:3 start:24 end:8786 gi|16596797|gb|AAK28276.2| hemocyanin G-type [Enteroctopus dofleini]	888.388	888.98	138	145	MDPSSHKA	0.234593	8
>Cluster-58773.162319;orf1 len=2921 frame:3 start:24 end:8786 gi|16596797|gb|AAK28276.2| hemocyanin G-type [Enteroctopus dofleini]	890.412	890.936	704	710	NNNKHTY	0.121699	7
>Cluster-58773.162319;orf1 len=2921 frame:3 start:24 end:8786 gi|16596797|gb|AAK28276.2| hemocyanin G-type [Enteroctopus dofleini]	892.351	892.968	1620	1627	GGESEMPW	0.555253	8
>Cluster-58773.162319;orf1 len=2921 frame:3 start:24 end:8786 gi|16596797|gb|AAK28276.2| hemocyanin G-type [Enteroctopus dofleini]	901.424	902.066	267	273	HKPMEPF	0.734071	7
>Cluster-58773.162319;orf1 len=2921 frame:3 start:24 end:8786 gi|16596797|gb|AAK28276.2| hemocyanin G-type [Enteroctopus dofleini]	905.346	905.967	2448	2455	GGDNEMPW	0.778264	8
>Cluster-58773.162319;orf1 len=2921 frame:3 start:24 end:8786 gi|16596797|gb|AAK28276.2| hemocyanin G-type [Enteroctopus dofleini]	908.346	908.968	1620	1627	GGESEMPW	0.555253	8
>Cluster-58773.162319;orf1 len=2921 frame:3 start:24 end:8786 gi|16596797|gb|AAK28276.2| hemocyanin G-type [Enteroctopus dofleini]	913.416	913.971	2817	2823	QHEDRVF	0.372931	7
>Cluster-58773.162319;orf1 len=2921 frame:3 start:24 end:8786 gi|16596797|gb|AAK28276.2| hemocyanin G-type [Enteroctopus dofleini]	916.398	917.037	371	378	GGVHEMTW	0.479901	8
>Cluster-58773.162319;orf1 len=2921 frame:3 start:24 end:8786 gi|16596797|gb|AAK28276.2| hemocyanin G-type [Enteroctopus dofleini]	921.341	921.966	2448	2455	GGDNEMPW	0.778264	8
>Cluster-58773.162319;orf1 len=2921 frame:3 start:24 end:8786 gi|16596797|gb|AAK28276.2| hemocyanin G-type [Enteroctopus dofleini]	923.393	924.026	790	797	GGSKEMEW	0.438552	8
>Cluster-58773.162319;orf1 len=2921 frame:3 start:24 end:8786 gi|16596797|gb|AAK28276.2| hemocyanin G-type [Enteroctopus dofleini]	930.443	931.002	2817	2823	QHEDRVF	0.372931	7
>Cluster-58773.162319;orf1 len=2921 frame:3 start:24 end:8786 gi|16596797|gb|AAK28276.2| hemocyanin G-type [Enteroctopus dofleini]	932.393	933.037	371	378	GGVHEMTW	0.479901	8
>Cluster-58773.162319;orf1 len=2921 frame:3 start:24 end:8786 gi|16596797|gb|AAK28276.2| hemocyanin G-type [Enteroctopus dofleini]	935.458	936.018	172	180	QSSKGGKNF	0.44303	9
>Cluster-58773.162319;orf1 len=2921 frame:3 start:24 end:8786 gi|16596797|gb|AAK28276.2| hemocyanin G-type [Enteroctopus dofleini]	939.388	940.025	790	797	GGSKEMEW	0.438552	8
>Cluster-58773.162319;orf1 len=2921 frame:3 start:24 end:8786 gi|16596797|gb|AAK28276.2| hemocyanin G-type [Enteroctopus dofleini]	952.485	953.049	172	180	QSSKGGKNF	0.44303	9
>Cluster-58773.162319;orf1 len=2921 frame:3 start:24 end:8786 gi|16596797|gb|AAK28276.2| hemocyanin G-type [Enteroctopus dofleini]	961.525	962.166	2532	2539	MRKNVNSL	0.12638	8
>Cluster-58773.162319;orf1 len=2921 frame:3 start:24 end:8786 gi|16596797|gb|AAK28276.2| hemocyanin G-type [Enteroctopus dofleini]	977.491	978.062	1907	1914	HHSNVDRL	0.329543	8
>Cluster-58773.162319;orf1 len=2921 frame:3 start:24 end:8786 gi|16596797|gb|AAK28276.2| hemocyanin G-type [Enteroctopus dofleini]	977.52	978.165	2532	2539	MRKNVNSL	0.12638	8
>Cluster-58773.162319;orf1 len=2921 frame:3 start:24 end:8786 gi|16596797|gb|AAK28276.2| hemocyanin G-type [Enteroctopus dofleini]	979.47	980.034	2728	2735	HHSNTDRI	0.233481	8
>Cluster-58773.162319;orf1 len=2921 frame:3 start:24 end:8786 gi|16596797|gb|AAK28276.2| hemocyanin G-type [Enteroctopus dofleini]	984.374	985.198	505	513	CCVHGMSTF	0.712209	9
>Cluster-58773.162319;orf1 len=2921 frame:3 start:24 end:8786 gi|16596797|gb|AAK28276.2| hemocyanin G-type [Enteroctopus dofleini]	985.36	986.071	2433	2441	CKDTTCEDA	0.108737	9
>Cluster-58773.162319;orf1 len=2921 frame:3 start:24 end:8786 gi|16596797|gb|AAK28276.2| hemocyanin G-type [Enteroctopus dofleini]	987.391	988.133	2842	2850	CTKDGDCVF	0.512675	9
>Cluster-58773.162319;orf1 len=2921 frame:3 start:24 end:8786 gi|16596797|gb|AAK28276.2| hemocyanin G-type [Enteroctopus dofleini]	987.427	988.001	458	465	TTEEEHEL	0.0266805	8
>Cluster-58773.162319;orf1 len=2921 frame:3 start:24 end:8786 gi|16596797|gb|AAK28276.2| hemocyanin G-type [Enteroctopus dofleini]	991.507	992.089	659	666	HHSQVDRL	0.282885	8
>Cluster-58773.162319;orf1 len=2921 frame:3 start:24 end:8786 gi|16596797|gb|AAK28276.2| hemocyanin G-type [Enteroctopus dofleini]	991.507	992.089	235	242	HHSNVERL	0.275042	8
>Cluster-58773.162319;orf1 len=2921 frame:3 start:24 end:8786 gi|16596797|gb|AAK28276.2| hemocyanin G-type [Enteroctopus dofleini]	993.438	994.181	77	86	PDGSTVVCCL	0.659001	10
>Cluster-58773.162319;orf1 len=2921 frame:3 start:24 end:8786 gi|16596797|gb|AAK28276.2| hemocyanin G-type [Enteroctopus dofleini]	994.489	995.155	2319	2326	HHSMVDRL	0.457398	8
>Cluster-58773.162319;orf1 len=2921 frame:3 start:24 end:8786 gi|16596797|gb|AAK28276.2| hemocyanin G-type [Enteroctopus dofleini]	1000.37	1001.2	505	513	CCVHGMSTF	0.712209	9
>Cluster-58773.162319;orf1 len=2921 frame:3 start:24 end:8786 gi|16596797|gb|AAK28276.2| hemocyanin G-type [Enteroctopus dofleini]	1010.48	1011.15	2319	2326	HHSMVDRL	0.457398	8
>Cluster-58773.162319;orf1 len=2921 frame:3 start:24 end:8786 gi|16596797|gb|AAK28276.2| hemocyanin G-type [Enteroctopus dofleini]	1013.62	1014.22	1698	1705	VRKNVERL	0.125128	8
>Cluster-58773.162319;orf1 len=2921 frame:3 start:24 end:8786 gi|16596797|gb|AAK28276.2| hemocyanin G-type [Enteroctopus dofleini]	1017.46	1018.08	1535	1543	THSTPNDVF	0.22504	9
>Cluster-58773.162319;orf1 len=2921 frame:3 start:24 end:8786 gi|16596797|gb|AAK28276.2| hemocyanin G-type [Enteroctopus dofleini]	1024.42	1025.02	888	896	EDDKSPNGY	0.246535	9
>Cluster-58773.162319;orf1 len=2921 frame:3 start:24 end:8786 gi|16596797|gb|AAK28276.2| hemocyanin G-type [Enteroctopus dofleini]	1025.4	1026.25	2586	2594	CCQHGMVTF	0.745641	9
>Cluster-58773.162319;orf1 len=2921 frame:3 start:24 end:8786 gi|16596797|gb|AAK28276.2| hemocyanin G-type [Enteroctopus dofleini]	1027.48	1028.07	1689	1697	KHEESNGNL	0.114054	9
>Cluster-58773.162319;orf1 len=2921 frame:3 start:24 end:8786 gi|16596797|gb|AAK28276.2| hemocyanin G-type [Enteroctopus dofleini]	1041.4	1042.25	2586	2594	CCQHGMVTF	0.745641	9
>Cluster-58773.162319;orf1 len=2921 frame:3 start:24 end:8786 gi|16596797|gb|AAK28276.2| hemocyanin G-type [Enteroctopus dofleini]	1059.58	1060.25	563	571	TKEVKPNPF	0.199075	9
>Cluster-58773.162319;orf1 len=2921 frame:3 start:24 end:8786 gi|16596797|gb|AAK28276.2| hemocyanin G-type [Enteroctopus dofleini]	1075.6	1076.21	864	872	RSRRDVSSL	0.113563	9
>Cluster-58773.162319;orf1 len=2921 frame:3 start:24 end:8786 gi|16596797|gb|AAK28276.2| hemocyanin G-type [Enteroctopus dofleini]	1077.52	1078.17	2634	2642	VTEEKNNPF	0.108005	9
>Cluster-58773.162319;orf1 len=2921 frame:3 start:24 end:8786 gi|16596797|gb|AAK28276.2| hemocyanin G-type [Enteroctopus dofleini]	1126.53	1127.27	1305	1313	KDMKNDGRY	0.25432	9
>Cluster-58773.162319;orf1 len=2921 frame:3 start:24 end:8786 gi|16596797|gb|AAK28276.2| hemocyanin G-type [Enteroctopus dofleini]	1137.51	1138.18	2664	2673	DDPEKGDKSF	0.311113	10
>Cluster-58773.162319;orf1 len=2921 frame:3 start:24 end:8786 gi|16596797|gb|AAK28276.2| hemocyanin G-type [Enteroctopus dofleini]	1142.53	1143.27	1305	1313	KDMKNDGRY	0.25432	9
>Cluster-58773.162319;orf1 len=2921 frame:3 start:24 end:8786 gi|16596797|gb|AAK28276.2| hemocyanin G-type [Enteroctopus dofleini]	1143.52	1144.26	1461	1471	GGRDPHSMSSL	0.597154	11
>Cluster-58773.162319;orf1 len=2921 frame:3 start:24 end:8786 gi|16596797|gb|AAK28276.2| hemocyanin G-type [Enteroctopus dofleini]	1149.55	1150.25	1071	1079	HHSNVDRVW	0.324079	9
>Cluster-58773.162319;orf1 len=2921 frame:3 start:24 end:8786 gi|16596797|gb|AAK28276.2| hemocyanin G-type [Enteroctopus dofleini]	1153.57	1154.28	595	604	EKPTKGHHGY	0.161443	10
>Cluster-58773.162319;orf1 len=2921 frame:3 start:24 end:8786 gi|16596797|gb|AAK28276.2| hemocyanin G-type [Enteroctopus dofleini]	1159.52	1160.26	1461	1471	GGRDPHSMSSL	0.597154	11
>Cluster-58773.162319;orf1 len=2921 frame:3 start:24 end:8786 gi|16596797|gb|AAK28276.2| hemocyanin G-type [Enteroctopus dofleini]	1221.56	1222.37	1325	1335	QCPNKDGSKVY	0.35103	11
>Cluster-58773.162319;orf1 len=2921 frame:3 start:24 end:8786 gi|16596797|gb|AAK28276.2| hemocyanin G-type [Enteroctopus dofleini]	1234.64	1235.39	849	859	TPGRKESDVVF	0.149495	11
>Cluster-58773.162319;orf1 len=2921 frame:3 start:24 end:8786 gi|16596797|gb|AAK28276.2| hemocyanin G-type [Enteroctopus dofleini]	1238.58	1239.4	1325	1335	QCPNKDGSKVY	0.35103	11
>Cluster-58773.162319;orf1 len=2921 frame:3 start:24 end:8786 gi|16596797|gb|AAK28276.2| hemocyanin G-type [Enteroctopus dofleini]	1261.62	1262.44	319	328	MKEHQQHPRA	0.150983	10
>Cluster-58773.162319;orf1 len=2921 frame:3 start:24 end:8786 gi|16596797|gb|AAK28276.2| hemocyanin G-type [Enteroctopus dofleini]	1277.62	1278.44	319	328	MKEHQQHPRA	0.150983	10
>Cluster-58773.162319;orf1 len=2921 frame:3 start:24 end:8786 gi|16596797|gb|AAK28276.2| hemocyanin G-type [Enteroctopus dofleini]	1300.69	1301.46	2405	2414	HKRQNTDRVF	0.193177	10
>Cluster-58773.162319;orf1 len=2921 frame:3 start:24 end:8786 gi|16596797|gb|AAK28276.2| hemocyanin G-type [Enteroctopus dofleini]	1317.56	1318.48	1599	1610	CVPTSKHEENCA	0.191903	12
>Cluster-58773.162319;orf1 len=2921 frame:3 start:24 end:8786 gi|16596797|gb|AAK28276.2| hemocyanin G-type [Enteroctopus dofleini]	1319.76	1320.62	1160	1169	NRRRMKGRVF	0.362318	10
>Cluster-58773.162319;orf1 len=2921 frame:3 start:24 end:8786 gi|16596797|gb|AAK28276.2| hemocyanin G-type [Enteroctopus dofleini]	1331.61	1332.45	2188	2199	EDSMRRHGSSVA	0.133332	12
>Cluster-58773.162319;orf1 len=2921 frame:3 start:24 end:8786 gi|16596797|gb|AAK28276.2| hemocyanin G-type [Enteroctopus dofleini]	1335.75	1336.62	1160	1169	NRRRMKGRVF	0.362318	10
>Cluster-58773.162319;orf1 len=2921 frame:3 start:24 end:8786 gi|16596797|gb|AAK28276.2| hemocyanin G-type [Enteroctopus dofleini]	1347.61	1348.45	2188	2199	EDSMRRHGSSVA	0.133332	12
>Cluster-58773.162319;orf1 len=2921 frame:3 start:24 end:8786 gi|16596797|gb|AAK28276.2| hemocyanin G-type [Enteroctopus dofleini]	1379.7	1380.52	1996	2005	RHQREHDRVF	0.172123	10
>Cluster-58773.162319;orf1 len=2921 frame:3 start:24 end:8786 gi|16596797|gb|AAK28276.2| hemocyanin G-type [Enteroctopus dofleini]	1390.52	1391.49	2024	2036	CVEGGECHEGSHF	0.467392	13
>Cluster-58773.162319;orf1 len=2921 frame:3 start:24 end:8786 gi|16596797|gb|AAK28276.2| hemocyanin G-type [Enteroctopus dofleini]	1412.75	1413.58	1412	1423	NSETKRDPQPKL	0.195449	12
>Cluster-58773.162319;orf1 len=2921 frame:3 start:24 end:8786 gi|16596797|gb|AAK28276.2| hemocyanin G-type [Enteroctopus dofleini]	1418.7	1419.55	2135	2146	TRVKEDKSDHGF	0.116447	12
>Cluster-58773.162319;orf1 len=2921 frame:3 start:24 end:8786 gi|16596797|gb|AAK28276.2| hemocyanin G-type [Enteroctopus dofleini]	1426.71	1427.63	1718	1729	KRMQKDKSSDGF	0.194358	12
>Cluster-58773.162319;orf1 len=2921 frame:3 start:24 end:8786 gi|16596797|gb|AAK28276.2| hemocyanin G-type [Enteroctopus dofleini]	1442.71	1443.63	1718	1729	KRMQKDKSSDGF	0.194358	12
>Cluster-58773.162319;orf1 len=2921 frame:3 start:24 end:8786 gi|16596797|gb|AAK28276.2| hemocyanin G-type [Enteroctopus dofleini]	1518.7	1519.69	1117	1129	NVDSMTREHSVPF	0.15307	13
>Cluster-58773.162319;orf1 len=2921 frame:3 start:24 end:8786 gi|16596797|gb|AAK28276.2| hemocyanin G-type [Enteroctopus dofleini]	1534.63	1535.7	2153	2166	HGSTMCPSPDDPKY	0.271473	14
>Cluster-58773.162319;orf1 len=2921 frame:3 start:24 end:8786 gi|16596797|gb|AAK28276.2| hemocyanin G-type [Enteroctopus dofleini]	1534.7	1535.69	1117	1129	NVDSMTREHSVPF	0.15307	13
>Cluster-58773.162319;orf1 len=2921 frame:3 start:24 end:8786 gi|16596797|gb|AAK28276.2| hemocyanin G-type [Enteroctopus dofleini]	1544.83	1545.74	2519	2531	EEEERKQVVKGTL	0.0980367	13
>Cluster-58773.162319;orf1 len=2921 frame:3 start:24 end:8786 gi|16596797|gb|AAK28276.2| hemocyanin G-type [Enteroctopus dofleini]	1550.62	1551.7	2153	2166	HGSTMCPSPDDPKY	0.271473	14
>Cluster-58773.162319;orf1 len=2921 frame:3 start:24 end:8786 gi|16596797|gb|AAK28276.2| hemocyanin G-type [Enteroctopus dofleini]	1574.7	1575.7	1828	1840	SEDTMTKREVSEY	0.0452612	13
>Cluster-58773.162319;orf1 len=2921 frame:3 start:24 end:8786 gi|16596797|gb|AAK28276.2| hemocyanin G-type [Enteroctopus dofleini]	1590.7	1591.7	1828	1840	SEDTMTKREVSEY	0.0452612	13
>Cluster-58773.162319;orf1 len=2921 frame:3 start:24 end:8786 gi|16596797|gb|AAK28276.2| hemocyanin G-type [Enteroctopus dofleini]	2344.02	2345.55	347	367	VCVPTDDKRHSDNCNNHVGSF	0.402536	21
>tr|A0A6P7SI10|A0A6P7SI10_OCTVU CD109 antigen isoform X2 OS=Octopus vulgaris OX=6645 GN=LOC115213260 PE=4 SV=1	804.4	804.886	961	967	QHKTGSF	0.264824	7
>tr|A0A6P7SI10|A0A6P7SI10_OCTVU CD109 antigen isoform X2 OS=Octopus vulgaris OX=6645 GN=LOC115213260 PE=4 SV=1	808.351	808.891	1306	1313	NETSGMGL	0.279906	8
>tr|A0A6P7SI10|A0A6P7SI10_OCTVU CD109 antigen isoform X2 OS=Octopus vulgaris OX=6645 GN=LOC115213260 PE=4 SV=1	809.445	810.015	147	152	VRMRTF	0.513287	6
>tr|A0A6P7SI10|A0A6P7SI10_OCTVU CD109 antigen isoform X2 OS=Octopus vulgaris OX=6645 GN=LOC115213260 PE=4 SV=1	814.347	815.004	663	669	PVMSSMY	0.389131	7
>tr|A0A6P7SI10|A0A6P7SI10_OCTVU CD109 antigen isoform X2 OS=Octopus vulgaris OX=6645 GN=LOC115213260 PE=4 SV=1	820.471	821.036	1177	1183	VKMRSSL	0.118541	7
>tr|A0A6P7SI10|A0A6P7SI10_OCTVU CD109 antigen isoform X2 OS=Octopus vulgaris OX=6645 GN=LOC115213260 PE=4 SV=1	824.346	824.89	1306	1313	NETSGMGL	0.279906	8
>tr|A0A6P7SI10|A0A6P7SI10_OCTVU CD109 antigen isoform X2 OS=Octopus vulgaris OX=6645 GN=LOC115213260 PE=4 SV=1	825.44	826.014	147	152	VRMRTF	0.513287	6
>tr|A0A6P7SI10|A0A6P7SI10_OCTVU CD109 antigen isoform X2 OS=Octopus vulgaris OX=6645 GN=LOC115213260 PE=4 SV=1	830.342	831.003	663	669	PVMSSMY	0.389131	7
>tr|A0A6P7SI10|A0A6P7SI10_OCTVU CD109 antigen isoform X2 OS=Octopus vulgaris OX=6645 GN=LOC115213260 PE=4 SV=1	836.466	837.035	1177	1183	VKMRSSL	0.118541	7
>tr|A0A6P7SI10|A0A6P7SI10_OCTVU CD109 antigen isoform X2 OS=Octopus vulgaris OX=6645 GN=LOC115213260 PE=4 SV=1	846.337	847.003	663	669	PVMSSMY	0.389131	7
>tr|A0A6P7SI10|A0A6P7SI10_OCTVU CD109 antigen isoform X2 OS=Octopus vulgaris OX=6645 GN=LOC115213260 PE=4 SV=1	847.416	847.905	803	809	KSNEQEL	0.0954521	7
>tr|A0A6P7SI10|A0A6P7SI10_OCTVU CD109 antigen isoform X2 OS=Octopus vulgaris OX=6645 GN=LOC115213260 PE=4 SV=1	850.415	850.906	1187	1194	DSTQSTVI	0.0764659	8
>tr|A0A6P7SI10|A0A6P7SI10_OCTVU CD109 antigen isoform X2 OS=Octopus vulgaris OX=6645 GN=LOC115213260 PE=4 SV=1	864.432	864.942	655	660	EERRQF	0.19294	6
>tr|A0A6P7SI10|A0A6P7SI10_OCTVU CD109 antigen isoform X2 OS=Octopus vulgaris OX=6645 GN=LOC115213260 PE=4 SV=1	865.489	866.014	817	824	KQVGSHPL	0.241255	8
>tr|A0A6P7SI10|A0A6P7SI10_OCTVU CD109 antigen isoform X2 OS=Octopus vulgaris OX=6645 GN=LOC115213260 PE=4 SV=1	870.395	870.899	702	709	DESGNVHI	0.106676	8
>tr|A0A6P7SI10|A0A6P7SI10_OCTVU CD109 antigen isoform X2 OS=Octopus vulgaris OX=6645 GN=LOC115213260 PE=4 SV=1	878.484	879.013	38	45	VHGKPNNI	0.173819	8
>tr|A0A6P7SI10|A0A6P7SI10_OCTVU CD109 antigen isoform X2 OS=Octopus vulgaris OX=6645 GN=LOC115213260 PE=4 SV=1	881.4	881.923	1217	1224	NVVDNTGY	0.103245	8
>tr|A0A6P7SI10|A0A6P7SI10_OCTVU CD109 antigen isoform X2 OS=Octopus vulgaris OX=6645 GN=LOC115213260 PE=4 SV=1	891.508	892.115	496	502	MKDRKTL	0.17058	7
>tr|A0A6P7SI10|A0A6P7SI10_OCTVU CD109 antigen isoform X2 OS=Octopus vulgaris OX=6645 GN=LOC115213260 PE=4 SV=1	901.474	902.001	481	488	EVNSSRPI	0.122988	8
>tr|A0A6P7SI10|A0A6P7SI10_OCTVU CD109 antigen isoform X2 OS=Octopus vulgaris OX=6645 GN=LOC115213260 PE=4 SV=1	903.366	903.995	790	796	NPEEMHF	0.522476	7
>tr|A0A6P7SI10|A0A6P7SI10_OCTVU CD109 antigen isoform X2 OS=Octopus vulgaris OX=6645 GN=LOC115213260 PE=4 SV=1	907.503	908.114	496	502	MKDRKTL	0.17058	7
>tr|A0A6P7SI10|A0A6P7SI10_OCTVU CD109 antigen isoform X2 OS=Octopus vulgaris OX=6645 GN=LOC115213260 PE=4 SV=1	910.499	911.052	473	480	KVGEEVHI	0.0447971	8
>tr|A0A6P7SI10|A0A6P7SI10_OCTVU CD109 antigen isoform X2 OS=Octopus vulgaris OX=6645 GN=LOC115213260 PE=4 SV=1	919.361	919.994	790	796	NPEEMHF	0.522476	7
>tr|A0A6P7SI10|A0A6P7SI10_OCTVU CD109 antigen isoform X2 OS=Octopus vulgaris OX=6645 GN=LOC115213260 PE=4 SV=1	923.44	924.073	1084	1091	RSVPGNMY	0.382996	8
>tr|A0A6P7SI10|A0A6P7SI10_OCTVU CD109 antigen isoform X2 OS=Octopus vulgaris OX=6645 GN=LOC115213260 PE=4 SV=1	936.452	936.997	51	58	KTTEEESI	0.0215334	8
>tr|A0A6P7SI10|A0A6P7SI10_OCTVU CD109 antigen isoform X2 OS=Octopus vulgaris OX=6645 GN=LOC115213260 PE=4 SV=1	939.435	940.072	1084	1091	RSVPGNMY	0.382996	8
>tr|A0A6P7SI10|A0A6P7SI10_OCTVU CD109 antigen isoform X2 OS=Octopus vulgaris OX=6645 GN=LOC115213260 PE=4 SV=1	942.41	943.032	1288	1295	NCTSSQRF	0.425297	8
>tr|A0A6P7SI10|A0A6P7SI10_OCTVU CD109 antigen isoform X2 OS=Octopus vulgaris OX=6645 GN=LOC115213260 PE=4 SV=1	951.405	951.971	400	407	SDNDPKEF	0.590615	8
>tr|A0A6P7SI10|A0A6P7SI10_OCTVU CD109 antigen isoform X2 OS=Octopus vulgaris OX=6645 GN=LOC115213260 PE=4 SV=1	977.513	978.206	734	741	PMKKPTEF	0.375955	8
>tr|A0A6P7SI10|A0A6P7SI10_OCTVU CD109 antigen isoform X2 OS=Octopus vulgaris OX=6645 GN=LOC115213260 PE=4 SV=1	981.507	982.194	993	1000	KKSMPEVY	0.181875	8
>tr|A0A6P7SI10|A0A6P7SI10_OCTVU CD109 antigen isoform X2 OS=Octopus vulgaris OX=6645 GN=LOC115213260 PE=4 SV=1	982.604	983.206	410	418	PVDGKVRVL	0.267558	9
>tr|A0A6P7SI10|A0A6P7SI10_OCTVU CD109 antigen isoform X2 OS=Octopus vulgaris OX=6645 GN=LOC115213260 PE=4 SV=1	992.468	993.067	197	205	SDKPTTGTW	0.442564	9
>tr|A0A6P7SI10|A0A6P7SI10_OCTVU CD109 antigen isoform X2 OS=Octopus vulgaris OX=6645 GN=LOC115213260 PE=4 SV=1	993.507	994.205	734	741	PMKKPTEF	0.375955	8
>tr|A0A6P7SI10|A0A6P7SI10_OCTVU CD109 antigen isoform X2 OS=Octopus vulgaris OX=6645 GN=LOC115213260 PE=4 SV=1	997.502	998.193	993	1000	KKSMPEVY	0.181875	8
>tr|A0A6P7SI10|A0A6P7SI10_OCTVU CD109 antigen isoform X2 OS=Octopus vulgaris OX=6645 GN=LOC115213260 PE=4 SV=1	1020.57	1021.21	843	851	VKPEGVTKY	0.0913981	9
>tr|A0A6P7SI10|A0A6P7SI10_OCTVU CD109 antigen isoform X2 OS=Octopus vulgaris OX=6645 GN=LOC115213260 PE=4 SV=1	1031.52	1032.21	159	167	TTVQQPMNI	0.0846016	9
>tr|A0A6P7SI10|A0A6P7SI10_OCTVU CD109 antigen isoform X2 OS=Octopus vulgaris OX=6645 GN=LOC115213260 PE=4 SV=1	1035.51	1036.14	1350	1357	DEVPREKY	0.0978026	8
>tr|A0A6P7SI10|A0A6P7SI10_OCTVU CD109 antigen isoform X2 OS=Octopus vulgaris OX=6645 GN=LOC115213260 PE=4 SV=1	1042.42	1043.17	1207	1216	SSCCDQSVTI	0.380641	10
>tr|A0A6P7SI10|A0A6P7SI10_OCTVU CD109 antigen isoform X2 OS=Octopus vulgaris OX=6645 GN=LOC115213260 PE=4 SV=1	1047.51	1048.21	159	167	TTVQQPMNI	0.0846016	9
>tr|A0A6P7SI10|A0A6P7SI10_OCTVU CD109 antigen isoform X2 OS=Octopus vulgaris OX=6645 GN=LOC115213260 PE=4 SV=1	1063.53	1064.14	1273	1281	KEEESKSNI	0.0437401	9
>tr|A0A6P7SI10|A0A6P7SI10_OCTVU CD109 antigen isoform X2 OS=Octopus vulgaris OX=6645 GN=LOC115213260 PE=4 SV=1	1064.55	1065.18	1015	1023	VRQSENGKF	0.284764	9
>tr|A0A6P7SI10|A0A6P7SI10_OCTVU CD109 antigen isoform X2 OS=Octopus vulgaris OX=6645 GN=LOC115213260 PE=4 SV=1	1072.61	1073.24	1162	1170	KRNEVEKGL	0.092679	9
>tr|A0A6P7SI10|A0A6P7SI10_OCTVU CD109 antigen isoform X2 OS=Octopus vulgaris OX=6645 GN=LOC115213260 PE=4 SV=1	1078.49	1079.29	857	866	MMNVTGSEPL	0.132871	10
>tr|A0A6P7SI10|A0A6P7SI10_OCTVU CD109 antigen isoform X2 OS=Octopus vulgaris OX=6645 GN=LOC115213260 PE=4 SV=1	1089.48	1090.14	507	515	VEVNDETHF	0.122835	9
>tr|A0A6P7SI10|A0A6P7SI10_OCTVU CD109 antigen isoform X2 OS=Octopus vulgaris OX=6645 GN=LOC115213260 PE=4 SV=1	1094.49	1095.29	857	866	MMNVTGSEPL	0.132871	10
>tr|A0A6P7SI10|A0A6P7SI10_OCTVU CD109 antigen isoform X2 OS=Octopus vulgaris OX=6645 GN=LOC115213260 PE=4 SV=1	1105.47	1106.2	1145	1154	VEEPDVEMSA	0.111983	10
>tr|A0A6P7SI10|A0A6P7SI10_OCTVU CD109 antigen isoform X2 OS=Octopus vulgaris OX=6645 GN=LOC115213260 PE=4 SV=1	1109.5	1110.3	338	347	TQKSMMSPEA	0.110885	10
>tr|A0A6P7SI10|A0A6P7SI10_OCTVU CD109 antigen isoform X2 OS=Octopus vulgaris OX=6645 GN=LOC115213260 PE=4 SV=1	1110.48	1111.29	857	866	MMNVTGSEPL	0.132871	10
>tr|A0A6P7SI10|A0A6P7SI10_OCTVU CD109 antigen isoform X2 OS=Octopus vulgaris OX=6645 GN=LOC115213260 PE=4 SV=1	1112.52	1113.24	387	395	TENDRMHPL	0.207191	9
>tr|A0A6P7SI10|A0A6P7SI10_OCTVU CD109 antigen isoform X2 OS=Octopus vulgaris OX=6645 GN=LOC115213260 PE=4 SV=1	1116.51	1117.16	1385	1394	DSSESTVKTY	0.109766	10
>tr|A0A6P7SI10|A0A6P7SI10_OCTVU CD109 antigen isoform X2 OS=Octopus vulgaris OX=6645 GN=LOC115213260 PE=4 SV=1	1117.57	1118.3	614	625	GGMPGSVTKVNA	0.240747	12
>tr|A0A6P7SI10|A0A6P7SI10_OCTVU CD109 antigen isoform X2 OS=Octopus vulgaris OX=6645 GN=LOC115213260 PE=4 SV=1	1119.49	1120.12	1066	1075	EPTRNSTDEA	0.0568976	10
>tr|A0A6P7SI10|A0A6P7SI10_OCTVU CD109 antigen isoform X2 OS=Octopus vulgaris OX=6645 GN=LOC115213260 PE=4 SV=1	1121.47	1122.2	1145	1154	VEEPDVEMSA	0.111983	10
>tr|A0A6P7SI10|A0A6P7SI10_OCTVU CD109 antigen isoform X2 OS=Octopus vulgaris OX=6645 GN=LOC115213260 PE=4 SV=1	1125.49	1126.3	338	347	TQKSMMSPEA	0.110885	10
>tr|A0A6P7SI10|A0A6P7SI10_OCTVU CD109 antigen isoform X2 OS=Octopus vulgaris OX=6645 GN=LOC115213260 PE=4 SV=1	1128.51	1129.24	387	395	TENDRMHPL	0.207191	9
>tr|A0A6P7SI10|A0A6P7SI10_OCTVU CD109 antigen isoform X2 OS=Octopus vulgaris OX=6645 GN=LOC115213260 PE=4 SV=1	1133.56	1134.3	614	625	GGMPGSVTKVNA	0.240747	12
>tr|A0A6P7SI10|A0A6P7SI10_OCTVU CD109 antigen isoform X2 OS=Octopus vulgaris OX=6645 GN=LOC115213260 PE=4 SV=1	1141.49	1142.3	338	347	TQKSMMSPEA	0.110885	10
>tr|A0A6P7SI10|A0A6P7SI10_OCTVU CD109 antigen isoform X2 OS=Octopus vulgaris OX=6645 GN=LOC115213260 PE=4 SV=1	1142.6	1143.26	357	366	RVSHSSSRNL	0.139742	10
>tr|A0A6P7SI10|A0A6P7SI10_OCTVU CD109 antigen isoform X2 OS=Octopus vulgaris OX=6645 GN=LOC115213260 PE=4 SV=1	1146.6	1147.28	774	783	KTDQEVNVTL	0.0572708	10
>tr|A0A6P7SI10|A0A6P7SI10_OCTVU CD109 antigen isoform X2 OS=Octopus vulgaris OX=6645 GN=LOC115213260 PE=4 SV=1	1149.66	1150.44	1130	1138	KSMKVKRSW	0.273758	9
>tr|A0A6P7SI10|A0A6P7SI10_OCTVU CD109 antigen isoform X2 OS=Octopus vulgaris OX=6645 GN=LOC115213260 PE=4 SV=1	1150.52	1151.19	971	980	GERDSRGSTW	0.353231	10
>tr|A0A6P7SI10|A0A6P7SI10_OCTVU CD109 antigen isoform X2 OS=Octopus vulgaris OX=6645 GN=LOC115213260 PE=4 SV=1	1165.65	1166.44	1130	1138	KSMKVKRSW	0.273758	9
>tr|A0A6P7SI10|A0A6P7SI10_OCTVU CD109 antigen isoform X2 OS=Octopus vulgaris OX=6645 GN=LOC115213260 PE=4 SV=1	1187.57	1188.35	420	429	DVPEKQNMNL	0.295337	10
>tr|A0A6P7SI10|A0A6P7SI10_OCTVU CD109 antigen isoform X2 OS=Octopus vulgaris OX=6645 GN=LOC115213260 PE=4 SV=1	1203.57	1204.35	420	429	DVPEKQNMNL	0.295337	10
>tr|A0A6P7SI10|A0A6P7SI10_OCTVU CD109 antigen isoform X2 OS=Octopus vulgaris OX=6645 GN=LOC115213260 PE=4 SV=1	1225.62	1226.45	1241	1251	KHVMPPDTTSI	0.157294	11
>tr|A0A6P7SI10|A0A6P7SI10_OCTVU CD109 antigen isoform X2 OS=Octopus vulgaris OX=6645 GN=LOC115213260 PE=4 SV=1	1226.58	1227.33	577	587	DVHTSPHSTVF	0.268482	11
>tr|A0A6P7SI10|A0A6P7SI10_OCTVU CD109 antigen isoform X2 OS=Octopus vulgaris OX=6645 GN=LOC115213260 PE=4 SV=1	1241.62	1242.45	1241	1251	KHVMPPDTTSI	0.157294	11
>tr|A0A6P7SI10|A0A6P7SI10_OCTVU CD109 antigen isoform X2 OS=Octopus vulgaris OX=6645 GN=LOC115213260 PE=4 SV=1	1325.57	1326.43	830	840	SSEMTDEVHKY	0.10419	11
>tr|A0A6P7SI10|A0A6P7SI10_OCTVU CD109 antigen isoform X2 OS=Octopus vulgaris OX=6645 GN=LOC115213260 PE=4 SV=1	1341.56	1342.43	830	840	SSEMTDEVHKY	0.10419	11
>tr|A0A6P7SI10|A0A6P7SI10_OCTVU CD109 antigen isoform X2 OS=Octopus vulgaris OX=6645 GN=LOC115213260 PE=4 SV=1	1397.68	1398.52	71	83	TVETTVSPDSSKF	0.0560125	13
>tr|A0A6P7SI10|A0A6P7SI10_OCTVU CD109 antigen isoform X2 OS=Octopus vulgaris OX=6645 GN=LOC115213260 PE=4 SV=1	1418.69	1419.67	908	920	VRKPSGCGEQNMI	0.359674	13
>tr|A0A6P7SI10|A0A6P7SI10_OCTVU CD109 antigen isoform X2 OS=Octopus vulgaris OX=6645 GN=LOC115213260 PE=4 SV=1	1434.68	1435.67	908	920	VRKPSGCGEQNMI	0.359674	13
>tr|A0A6P7SI10|A0A6P7SI10_OCTVU CD109 antigen isoform X2 OS=Octopus vulgaris OX=6645 GN=LOC115213260 PE=4 SV=1	1475.71	1476.6	181	194	TNEHSPSGVVSKSF	0.162613	14
>tr|A0A6P7SI10|A0A6P7SI10_OCTVU CD109 antigen isoform X2 OS=Octopus vulgaris OX=6645 GN=LOC115213260 PE=4 SV=1	1560.8	1561.7	671	686	KDNGPGGKSSGSKQTI	0.419155	16
>Cluster-58773.160860;orf1 len=1941 frame:2 start:4361 end:10183 sp|P24733|MYS_ARGIR Myosin heavy chain, striated muscle OS=Argopecten irradians PE=1 SV=1 >Cluster-58773.160883;orf1 len=1941 frame:3 start:4323 end:10145 gi|566553581|emb|CDG41623.1| myosin heavy chain isoform A [Octopus bimaculoides] >Cluster-58773.160904;orf1 len=1941 frame:2 start:4337 end:10159 gi|566553581|emb|CDG41623.1| myos…	802.394	802.864	609	615	NENVVDL	0.0816955	7
>Cluster-58773.160860;orf1 len=1941 frame:2 start:4361 end:10183 sp|P24733|MYS_ARGIR Myosin heavy chain, striated muscle OS=Argopecten irradians PE=1 SV=1 >Cluster-58773.160883;orf1 len=1941 frame:3 start:4323 end:10145 gi|566553581|emb|CDG41623.1| myosin heavy chain isoform A [Octopus bimaculoides] >Cluster-58773.160904;orf1 len=1941 frame:2 start:4337 end:10159 gi|566553581|emb|CDG41623.1| myos…	802.478	802.955	1043	1048	EREKKI	0.051509	6
>Cluster-58773.160860;orf1 len=1941 frame:2 start:4361 end:10183 sp|P24733|MYS_ARGIR Myosin heavy chain, striated muscle OS=Argopecten irradians PE=1 SV=1 >Cluster-58773.160883;orf1 len=1941 frame:3 start:4323 end:10145 gi|566553581|emb|CDG41623.1| myosin heavy chain isoform A [Octopus bimaculoides] >Cluster-58773.160904;orf1 len=1941 frame:2 start:4337 end:10159 gi|566553581|emb|CDG41623.1| myos…	803.259	803.89	541	546	EEECMF	0.464856	6
>Cluster-58773.160860;orf1 len=1941 frame:2 start:4361 end:10183 sp|P24733|MYS_ARGIR Myosin heavy chain, striated muscle OS=Argopecten irradians PE=1 SV=1 >Cluster-58773.160883;orf1 len=1941 frame:3 start:4323 end:10145 gi|566553581|emb|CDG41623.1| myosin heavy chain isoform A [Octopus bimaculoides] >Cluster-58773.160904;orf1 len=1941 frame:2 start:4337 end:10159 gi|566553581|emb|CDG41623.1| myos…	803.389	803.852	1229	1235	RGEVDDL	0.114137	7
>Cluster-58773.160860;orf1 len=1941 frame:2 start:4361 end:10183 sp|P24733|MYS_ARGIR Myosin heavy chain, striated muscle OS=Argopecten irradians PE=1 SV=1 >Cluster-58773.160883;orf1 len=1941 frame:3 start:4323 end:10145 gi|566553581|emb|CDG41623.1| myosin heavy chain isoform A [Octopus bimaculoides] >Cluster-58773.160904;orf1 len=1941 frame:2 start:4337 end:10159 gi|566553581|emb|CDG41623.1| myos…	804.396	804.843	1634	1641	DGSNRGKA	0.248123	8
>Cluster-58773.160860;orf1 len=1941 frame:2 start:4361 end:10183 sp|P24733|MYS_ARGIR Myosin heavy chain, striated muscle OS=Argopecten irradians PE=1 SV=1 >Cluster-58773.160883;orf1 len=1941 frame:3 start:4323 end:10145 gi|566553581|emb|CDG41623.1| myosin heavy chain isoform A [Octopus bimaculoides] >Cluster-58773.160904;orf1 len=1941 frame:2 start:4337 end:10159 gi|566553581|emb|CDG41623.1| myos…	816.432	816.897	373	379	KQRGEQA	0.0593347	7
>Cluster-58773.160860;orf1 len=1941 frame:2 start:4361 end:10183 sp|P24733|MYS_ARGIR Myosin heavy chain, striated muscle OS=Argopecten irradians PE=1 SV=1 >Cluster-58773.160883;orf1 len=1941 frame:3 start:4323 end:10145 gi|566553581|emb|CDG41623.1| myosin heavy chain isoform A [Octopus bimaculoides] >Cluster-58773.160904;orf1 len=1941 frame:2 start:4337 end:10159 gi|566553581|emb|CDG41623.1| myos…	819.468	819.942	1278	1284	TSQKSRL	0.141629	7
>Cluster-58773.160860;orf1 len=1941 frame:2 start:4361 end:10183 sp|P24733|MYS_ARGIR Myosin heavy chain, striated muscle OS=Argopecten irradians PE=1 SV=1 >Cluster-58773.160883;orf1 len=1941 frame:3 start:4323 end:10145 gi|566553581|emb|CDG41623.1| myosin heavy chain isoform A [Octopus bimaculoides] >Cluster-58773.160904;orf1 len=1941 frame:2 start:4337 end:10159 gi|566553581|emb|CDG41623.1| myos…	827.378	827.871	629	636	TPPETPDA	0.154009	8
>Cluster-58773.160860;orf1 len=1941 frame:2 start:4361 end:10183 sp|P24733|MYS_ARGIR Myosin heavy chain, striated muscle OS=Argopecten irradians PE=1 SV=1 >Cluster-58773.160883;orf1 len=1941 frame:3 start:4323 end:10145 gi|566553581|emb|CDG41623.1| myosin heavy chain isoform A [Octopus bimaculoides] >Cluster-58773.160904;orf1 len=1941 frame:2 start:4337 end:10159 gi|566553581|emb|CDG41623.1| myos…	829.441	829.934	602	608	DKNKDPI	0.202101	7
>Cluster-58773.160860;orf1 len=1941 frame:2 start:4361 end:10183 sp|P24733|MYS_ARGIR Myosin heavy chain, striated muscle OS=Argopecten irradians PE=1 SV=1 >Cluster-58773.160883;orf1 len=1941 frame:3 start:4323 end:10145 gi|566553581|emb|CDG41623.1| myosin heavy chain isoform A [Octopus bimaculoides] >Cluster-58773.160904;orf1 len=1941 frame:2 start:4337 end:10159 gi|566553581|emb|CDG41623.1| myos…	832.405	832.891	878	884	EEQNVTL	0.0615054	7
>Cluster-58773.160860;orf1 len=1941 frame:2 start:4361 end:10183 sp|P24733|MYS_ARGIR Myosin heavy chain, striated muscle OS=Argopecten irradians PE=1 SV=1 >Cluster-58773.160883;orf1 len=1941 frame:3 start:4323 end:10145 gi|566553581|emb|CDG41623.1| myosin heavy chain isoform A [Octopus bimaculoides] >Cluster-58773.160904;orf1 len=1941 frame:2 start:4337 end:10159 gi|566553581|emb|CDG41623.1| myos…	832.416	832.894	1714	1720	SDRVNEL	0.139167	7
>Cluster-58773.160860;orf1 len=1941 frame:2 start:4361 end:10183 sp|P24733|MYS_ARGIR Myosin heavy chain, striated muscle OS=Argopecten irradians PE=1 SV=1 >Cluster-58773.160883;orf1 len=1941 frame:3 start:4323 end:10145 gi|566553581|emb|CDG41623.1| myosin heavy chain isoform A [Octopus bimaculoides] >Cluster-58773.160904;orf1 len=1941 frame:2 start:4337 end:10159 gi|566553581|emb|CDG41623.1| myos…	832.441	832.934	1791	1797	ESQVKEL	0.0757634	7
>Cluster-58773.160860;orf1 len=1941 frame:2 start:4361 end:10183 sp|P24733|MYS_ARGIR Myosin heavy chain, striated muscle OS=Argopecten irradians PE=1 SV=1 >Cluster-58773.160883;orf1 len=1941 frame:3 start:4323 end:10145 gi|566553581|emb|CDG41623.1| myosin heavy chain isoform A [Octopus bimaculoides] >Cluster-58773.160904;orf1 len=1941 frame:2 start:4337 end:10159 gi|566553581|emb|CDG41623.1| myos…	834.487	835.063	1561	1567	KVMRSTL	0.135019	7
>Cluster-58773.160860;orf1 len=1941 frame:2 start:4361 end:10183 sp|P24733|MYS_ARGIR Myosin heavy chain, striated muscle OS=Argopecten irradians PE=1 SV=1 >Cluster-58773.160883;orf1 len=1941 frame:3 start:4323 end:10145 gi|566553581|emb|CDG41623.1| myosin heavy chain isoform A [Octopus bimaculoides] >Cluster-58773.160904;orf1 len=1941 frame:2 start:4337 end:10159 gi|566553581|emb|CDG41623.1| myos…	840.367	840.939	1461	1467	QHKCNDL	0.285088	7
>Cluster-58773.160860;orf1 len=1941 frame:2 start:4361 end:10183 sp|P24733|MYS_ARGIR Myosin heavy chain, striated muscle OS=Argopecten irradians PE=1 SV=1 >Cluster-58773.160883;orf1 len=1941 frame:3 start:4323 end:10145 gi|566553581|emb|CDG41623.1| myosin heavy chain isoform A [Octopus bimaculoides] >Cluster-58773.160904;orf1 len=1941 frame:2 start:4337 end:10159 gi|566553581|emb|CDG41623.1| myos…	841.289	842.005	87	93	EMNMDMA	0.353661	7
>Cluster-58773.160860;orf1 len=1941 frame:2 start:4361 end:10183 sp|P24733|MYS_ARGIR Myosin heavy chain, striated muscle OS=Argopecten irradians PE=1 SV=1 >Cluster-58773.160883;orf1 len=1941 frame:3 start:4323 end:10145 gi|566553581|emb|CDG41623.1| myosin heavy chain isoform A [Octopus bimaculoides] >Cluster-58773.160904;orf1 len=1941 frame:2 start:4337 end:10159 gi|566553581|emb|CDG41623.1| myos…	841.525	842.035	1215	1221	QKVKSRL	0.127683	7
>Cluster-58773.160860;orf1 len=1941 frame:2 start:4361 end:10183 sp|P24733|MYS_ARGIR Myosin heavy chain, striated muscle OS=Argopecten irradians PE=1 SV=1 >Cluster-58773.160883;orf1 len=1941 frame:3 start:4323 end:10145 gi|566553581|emb|CDG41623.1| myosin heavy chain isoform A [Octopus bimaculoides] >Cluster-58773.160904;orf1 len=1941 frame:2 start:4337 end:10159 gi|566553581|emb|CDG41623.1| myos…	846.457	846.962	955	961	KKDVEDL	0.0746204	7
>Cluster-58773.160860;orf1 len=1941 frame:2 start:4361 end:10183 sp|P24733|MYS_ARGIR Myosin heavy chain, striated muscle OS=Argopecten irradians PE=1 SV=1 >Cluster-58773.160883;orf1 len=1941 frame:3 start:4323 end:10145 gi|566553581|emb|CDG41623.1| myosin heavy chain isoform A [Octopus bimaculoides] >Cluster-58773.160904;orf1 len=1941 frame:2 start:4337 end:10159 gi|566553581|emb|CDG41623.1| myos…	846.479	846.967	1197	1203	RKKNTEA	0.0358893	7
>Cluster-58773.160860;orf1 len=1941 frame:2 start:4361 end:10183 sp|P24733|MYS_ARGIR Myosin heavy chain, striated muscle OS=Argopecten irradians PE=1 SV=1 >Cluster-58773.160883;orf1 len=1941 frame:3 start:4323 end:10145 gi|566553581|emb|CDG41623.1| myosin heavy chain isoform A [Octopus bimaculoides] >Cluster-58773.160904;orf1 len=1941 frame:2 start:4337 end:10159 gi|566553581|emb|CDG41623.1| myos…	848.458	848.94	1927	1934	KNRSSVSA	0.0704538	8
>Cluster-58773.160860;orf1 len=1941 frame:2 start:4361 end:10183 sp|P24733|MYS_ARGIR Myosin heavy chain, striated muscle OS=Argopecten irradians PE=1 SV=1 >Cluster-58773.160883;orf1 len=1941 frame:3 start:4323 end:10145 gi|566553581|emb|CDG41623.1| myosin heavy chain isoform A [Octopus bimaculoides] >Cluster-58773.160904;orf1 len=1941 frame:2 start:4337 end:10159 gi|566553581|emb|CDG41623.1| myos…	850.388	850.977	33	39	DGKKNCW	0.631084	7
>Cluster-58773.160860;orf1 len=1941 frame:2 start:4361 end:10183 sp|P24733|MYS_ARGIR Myosin heavy chain, striated muscle OS=Argopecten irradians PE=1 SV=1 >Cluster-58773.160883;orf1 len=1941 frame:3 start:4323 end:10145 gi|566553581|emb|CDG41623.1| myosin heavy chain isoform A [Octopus bimaculoides] >Cluster-58773.160904;orf1 len=1941 frame:2 start:4337 end:10159 gi|566553581|emb|CDG41623.1| myos…	850.481	851.062	1561	1567	KVMRSTL	0.135019	7
>Cluster-58773.160860;orf1 len=1941 frame:2 start:4361 end:10183 sp|P24733|MYS_ARGIR Myosin heavy chain, striated muscle OS=Argopecten irradians PE=1 SV=1 >Cluster-58773.160883;orf1 len=1941 frame:3 start:4323 end:10145 gi|566553581|emb|CDG41623.1| myosin heavy chain isoform A [Octopus bimaculoides] >Cluster-58773.160904;orf1 len=1941 frame:2 start:4337 end:10159 gi|566553581|emb|CDG41623.1| myos…	853.391	854.041	67	73	TCEMRTI	0.183544	7
>Cluster-58773.160860;orf1 len=1941 frame:2 start:4361 end:10183 sp|P24733|MYS_ARGIR Myosin heavy chain, striated muscle OS=Argopecten irradians PE=1 SV=1 >Cluster-58773.160883;orf1 len=1941 frame:3 start:4323 end:10145 gi|566553581|emb|CDG41623.1| myosin heavy chain isoform A [Octopus bimaculoides] >Cluster-58773.160904;orf1 len=1941 frame:2 start:4337 end:10159 gi|566553581|emb|CDG41623.1| myos…	857.284	858.005	87	93	EMNMDMA	0.353661	7
>Cluster-58773.160860;orf1 len=1941 frame:2 start:4361 end:10183 sp|P24733|MYS_ARGIR Myosin heavy chain, striated muscle OS=Argopecten irradians PE=1 SV=1 >Cluster-58773.160883;orf1 len=1941 frame:3 start:4323 end:10145 gi|566553581|emb|CDG41623.1| myosin heavy chain isoform A [Octopus bimaculoides] >Cluster-58773.160904;orf1 len=1941 frame:2 start:4337 end:10159 gi|566553581|emb|CDG41623.1| myos…	857.393	857.969	1461	1467	QHKCNDL	0.285088	7
>Cluster-58773.160860;orf1 len=1941 frame:2 start:4361 end:10183 sp|P24733|MYS_ARGIR Myosin heavy chain, striated muscle OS=Argopecten irradians PE=1 SV=1 >Cluster-58773.160883;orf1 len=1941 frame:3 start:4323 end:10145 gi|566553581|emb|CDG41623.1| myosin heavy chain isoform A [Octopus bimaculoides] >Cluster-58773.160904;orf1 len=1941 frame:2 start:4337 end:10159 gi|566553581|emb|CDG41623.1| myos…	858.552	859.066	1215	1221	QKVKSRL	0.127683	7
>Cluster-58773.160860;orf1 len=1941 frame:2 start:4361 end:10183 sp|P24733|MYS_ARGIR Myosin heavy chain, striated muscle OS=Argopecten irradians PE=1 SV=1 >Cluster-58773.160883;orf1 len=1941 frame:3 start:4323 end:10145 gi|566553581|emb|CDG41623.1| myosin heavy chain isoform A [Octopus bimaculoides] >Cluster-58773.160904;orf1 len=1941 frame:2 start:4337 end:10159 gi|566553581|emb|CDG41623.1| myos…	859.463	859.963	1883	1889	KRQVEEA	0.0326201	7
>Cluster-58773.160860;orf1 len=1941 frame:2 start:4361 end:10183 sp|P24733|MYS_ARGIR Myosin heavy chain, striated muscle OS=Argopecten irradians PE=1 SV=1 >Cluster-58773.160883;orf1 len=1941 frame:3 start:4323 end:10145 gi|566553581|emb|CDG41623.1| myosin heavy chain isoform A [Octopus bimaculoides] >Cluster-58773.160904;orf1 len=1941 frame:2 start:4337 end:10159 gi|566553581|emb|CDG41623.1| myos…	861.468	861.976	1222	1228	EKEKSQL	0.0492798	7
>Cluster-58773.160860;orf1 len=1941 frame:2 start:4361 end:10183 sp|P24733|MYS_ARGIR Myosin heavy chain, striated muscle OS=Argopecten irradians PE=1 SV=1 >Cluster-58773.160883;orf1 len=1941 frame:3 start:4323 end:10145 gi|566553581|emb|CDG41623.1| myosin heavy chain isoform A [Octopus bimaculoides] >Cluster-58773.160904;orf1 len=1941 frame:2 start:4337 end:10159 gi|566553581|emb|CDG41623.1| myos…	866.371	866.974	1454	1460	DKTMGEW	0.328496	7
>Cluster-58773.160860;orf1 len=1941 frame:2 start:4361 end:10183 sp|P24733|MYS_ARGIR Myosin heavy chain, striated muscle OS=Argopecten irradians PE=1 SV=1 >Cluster-58773.160883;orf1 len=1941 frame:3 start:4323 end:10145 gi|566553581|emb|CDG41623.1| myosin heavy chain isoform A [Octopus bimaculoides] >Cluster-58773.160904;orf1 len=1941 frame:2 start:4337 end:10159 gi|566553581|emb|CDG41623.1| myos…	866.473	866.998	277	283	EKSRVTF	0.153511	7
>Cluster-58773.160860;orf1 len=1941 frame:2 start:4361 end:10183 sp|P24733|MYS_ARGIR Myosin heavy chain, striated muscle OS=Argopecten irradians PE=1 SV=1 >Cluster-58773.160883;orf1 len=1941 frame:3 start:4323 end:10145 gi|566553581|emb|CDG41623.1| myosin heavy chain isoform A [Octopus bimaculoides] >Cluster-58773.160904;orf1 len=1941 frame:2 start:4337 end:10159 gi|566553581|emb|CDG41623.1| myos…	869.385	870.04	67	73	TCEMRTI	0.183544	7
>Cluster-58773.160860;orf1 len=1941 frame:2 start:4361 end:10183 sp|P24733|MYS_ARGIR Myosin heavy chain, striated muscle OS=Argopecten irradians PE=1 SV=1 >Cluster-58773.160883;orf1 len=1941 frame:3 start:4323 end:10145 gi|566553581|emb|CDG41623.1| myosin heavy chain isoform A [Octopus bimaculoides] >Cluster-58773.160904;orf1 len=1941 frame:2 start:4337 end:10159 gi|566553581|emb|CDG41623.1| myos…	873.279	874.004	87	93	EMNMDMA	0.353661	7
>Cluster-58773.160860;orf1 len=1941 frame:2 start:4361 end:10183 sp|P24733|MYS_ARGIR Myosin heavy chain, striated muscle OS=Argopecten irradians PE=1 SV=1 >Cluster-58773.160883;orf1 len=1941 frame:3 start:4323 end:10145 gi|566553581|emb|CDG41623.1| myosin heavy chain isoform A [Octopus bimaculoides] >Cluster-58773.160904;orf1 len=1941 frame:2 start:4337 end:10159 gi|566553581|emb|CDG41623.1| myos…	873.515	874.034	997	1003	NKEKKNL	0.0846635	7
>Cluster-58773.160860;orf1 len=1941 frame:2 start:4361 end:10183 sp|P24733|MYS_ARGIR Myosin heavy chain, striated muscle OS=Argopecten irradians PE=1 SV=1 >Cluster-58773.160883;orf1 len=1941 frame:3 start:4323 end:10145 gi|566553581|emb|CDG41623.1| myosin heavy chain isoform A [Octopus bimaculoides] >Cluster-58773.160904;orf1 len=1941 frame:2 start:4337 end:10159 gi|566553581|emb|CDG41623.1| myos…	882.366	882.973	1454	1460	DKTMGEW	0.328496	7
>Cluster-58773.160860;orf1 len=1941 frame:2 start:4361 end:10183 sp|P24733|MYS_ARGIR Myosin heavy chain, striated muscle OS=Argopecten irradians PE=1 SV=1 >Cluster-58773.160883;orf1 len=1941 frame:3 start:4323 end:10145 gi|566553581|emb|CDG41623.1| myosin heavy chain isoform A [Octopus bimaculoides] >Cluster-58773.160904;orf1 len=1941 frame:2 start:4337 end:10159 gi|566553581|emb|CDG41623.1| myos…	883.402	883.901	1774	1780	RQEQDHA	0.0918294	7
>Cluster-58773.160860;orf1 len=1941 frame:2 start:4361 end:10183 sp|P24733|MYS_ARGIR Myosin heavy chain, striated muscle OS=Argopecten irradians PE=1 SV=1 >Cluster-58773.160883;orf1 len=1941 frame:3 start:4323 end:10145 gi|566553581|emb|CDG41623.1| myosin heavy chain isoform A [Octopus bimaculoides] >Cluster-58773.160904;orf1 len=1941 frame:2 start:4337 end:10159 gi|566553581|emb|CDG41623.1| myos…	888.442	888.958	653	660	SSTHKESL	0.150746	8
>Cluster-58773.160860;orf1 len=1941 frame:2 start:4361 end:10183 sp|P24733|MYS_ARGIR Myosin heavy chain, striated muscle OS=Argopecten irradians PE=1 SV=1 >Cluster-58773.160883;orf1 len=1941 frame:3 start:4323 end:10145 gi|566553581|emb|CDG41623.1| myosin heavy chain isoform A [Octopus bimaculoides] >Cluster-58773.160904;orf1 len=1941 frame:2 start:4337 end:10159 gi|566553581|emb|CDG41623.1| myos…	888.446	889.002	40	47	VPDPKEGF	0.613919	8
>Cluster-58773.160860;orf1 len=1941 frame:2 start:4361 end:10183 sp|P24733|MYS_ARGIR Myosin heavy chain, striated muscle OS=Argopecten irradians PE=1 SV=1 >Cluster-58773.160883;orf1 len=1941 frame:3 start:4323 end:10145 gi|566553581|emb|CDG41623.1| myosin heavy chain isoform A [Octopus bimaculoides] >Cluster-58773.160904;orf1 len=1941 frame:2 start:4337 end:10159 gi|566553581|emb|CDG41623.1| myos…	888.49	889.005	1820	1826	ESRVREL	0.0856576	7
>Cluster-58773.160860;orf1 len=1941 frame:2 start:4361 end:10183 sp|P24733|MYS_ARGIR Myosin heavy chain, striated muscle OS=Argopecten irradians PE=1 SV=1 >Cluster-58773.160883;orf1 len=1941 frame:3 start:4323 end:10145 gi|566553581|emb|CDG41623.1| myosin heavy chain isoform A [Octopus bimaculoides] >Cluster-58773.160904;orf1 len=1941 frame:2 start:4337 end:10159 gi|566553581|emb|CDG41623.1| myos…	889.274	890.003	87	93	EMNMDMA	0.353661	7
>Cluster-58773.160860;orf1 len=1941 frame:2 start:4361 end:10183 sp|P24733|MYS_ARGIR Myosin heavy chain, striated muscle OS=Argopecten irradians PE=1 SV=1 >Cluster-58773.160883;orf1 len=1941 frame:3 start:4323 end:10145 gi|566553581|emb|CDG41623.1| myosin heavy chain isoform A [Octopus bimaculoides] >Cluster-58773.160904;orf1 len=1941 frame:2 start:4337 end:10159 gi|566553581|emb|CDG41623.1| myos…	892.5	893.04	1447	1453	EKKQRGF	0.221659	7
>Cluster-58773.160860;orf1 len=1941 frame:2 start:4361 end:10183 sp|P24733|MYS_ARGIR Myosin heavy chain, striated muscle OS=Argopecten irradians PE=1 SV=1 >Cluster-58773.160883;orf1 len=1941 frame:3 start:4323 end:10145 gi|566553581|emb|CDG41623.1| myosin heavy chain isoform A [Octopus bimaculoides] >Cluster-58773.160904;orf1 len=1941 frame:2 start:4337 end:10159 gi|566553581|emb|CDG41623.1| myos…	898.434	899.06	861	867	TKMKDEF	0.141402	7
>Cluster-58773.160860;orf1 len=1941 frame:2 start:4361 end:10183 sp|P24733|MYS_ARGIR Myosin heavy chain, striated muscle OS=Argopecten irradians PE=1 SV=1 >Cluster-58773.160883;orf1 len=1941 frame:3 start:4323 end:10145 gi|566553581|emb|CDG41623.1| myosin heavy chain isoform A [Octopus bimaculoides] >Cluster-58773.160904;orf1 len=1941 frame:2 start:4337 end:10159 gi|566553581|emb|CDG41623.1| myos…	900.526	901.06	1901	1907	RKVQQEL	0.0540471	7
>Cluster-58773.160860;orf1 len=1941 frame:2 start:4361 end:10183 sp|P24733|MYS_ARGIR Myosin heavy chain, striated muscle OS=Argopecten irradians PE=1 SV=1 >Cluster-58773.160883;orf1 len=1941 frame:3 start:4323 end:10145 gi|566553581|emb|CDG41623.1| myosin heavy chain isoform A [Octopus bimaculoides] >Cluster-58773.160904;orf1 len=1941 frame:2 start:4337 end:10159 gi|566553581|emb|CDG41623.1| myos…	914.429	915.059	861	867	TKMKDEF	0.141402	7
>Cluster-58773.160860;orf1 len=1941 frame:2 start:4361 end:10183 sp|P24733|MYS_ARGIR Myosin heavy chain, striated muscle OS=Argopecten irradians PE=1 SV=1 >Cluster-58773.160883;orf1 len=1941 frame:3 start:4323 end:10145 gi|566553581|emb|CDG41623.1| myosin heavy chain isoform A [Octopus bimaculoides] >Cluster-58773.160904;orf1 len=1941 frame:2 start:4337 end:10159 gi|566553581|emb|CDG41623.1| myos…	921.384	921.942	1581	1587	QEKEEEF	0.0633378	7
>Cluster-58773.160860;orf1 len=1941 frame:2 start:4361 end:10183 sp|P24733|MYS_ARGIR Myosin heavy chain, striated muscle OS=Argopecten irradians PE=1 SV=1 >Cluster-58773.160883;orf1 len=1941 frame:3 start:4323 end:10145 gi|566553581|emb|CDG41623.1| myosin heavy chain isoform A [Octopus bimaculoides] >Cluster-58773.160904;orf1 len=1941 frame:2 start:4337 end:10159 gi|566553581|emb|CDG41623.1| myos…	929.528	930.061	1503	1509	RRENKNL	0.14069	7
>Cluster-58773.160860;orf1 len=1941 frame:2 start:4361 end:10183 sp|P24733|MYS_ARGIR Myosin heavy chain, striated muscle OS=Argopecten irradians PE=1 SV=1 >Cluster-58773.160883;orf1 len=1941 frame:3 start:4323 end:10145 gi|566553581|emb|CDG41623.1| myosin heavy chain isoform A [Octopus bimaculoides] >Cluster-58773.160904;orf1 len=1941 frame:2 start:4337 end:10159 gi|566553581|emb|CDG41623.1| myos…	938.41	938.972	1581	1587	QEKEEEF	0.0633378	7
>Cluster-58773.160860;orf1 len=1941 frame:2 start:4361 end:10183 sp|P24733|MYS_ARGIR Myosin heavy chain, striated muscle OS=Argopecten irradians PE=1 SV=1 >Cluster-58773.160883;orf1 len=1941 frame:3 start:4323 end:10145 gi|566553581|emb|CDG41623.1| myosin heavy chain isoform A [Octopus bimaculoides] >Cluster-58773.160904;orf1 len=1941 frame:2 start:4337 end:10159 gi|566553581|emb|CDG41623.1| myos…	948.461	949.123	79	86	SQMNPPKF	0.852785	8
>Cluster-58773.160860;orf1 len=1941 frame:2 start:4361 end:10183 sp|P24733|MYS_ARGIR Myosin heavy chain, striated muscle OS=Argopecten irradians PE=1 SV=1 >Cluster-58773.160883;orf1 len=1941 frame:3 start:4323 end:10145 gi|566553581|emb|CDG41623.1| myosin heavy chain isoform A [Octopus bimaculoides] >Cluster-58773.160904;orf1 len=1941 frame:2 start:4337 end:10159 gi|566553581|emb|CDG41623.1| myos…	964.456	965.123	79	86	SQMNPPKF	0.852785	8
>Cluster-58773.160860;orf1 len=1941 frame:2 start:4361 end:10183 sp|P24733|MYS_ARGIR Myosin heavy chain, striated muscle OS=Argopecten irradians PE=1 SV=1 >Cluster-58773.160883;orf1 len=1941 frame:3 start:4323 end:10145 gi|566553581|emb|CDG41623.1| myosin heavy chain isoform A [Octopus bimaculoides] >Cluster-58773.160904;orf1 len=1941 frame:2 start:4337 end:10159 gi|566553581|emb|CDG41623.1| myos…	966.584	967.166	446	453	VKRVNHTL	0.0897271	8
>Cluster-58773.160860;orf1 len=1941 frame:2 start:4361 end:10183 sp|P24733|MYS_ARGIR Myosin heavy chain, striated muscle OS=Argopecten irradians PE=1 SV=1 >Cluster-58773.160883;orf1 len=1941 frame:3 start:4323 end:10145 gi|566553581|emb|CDG41623.1| myosin heavy chain isoform A [Octopus bimaculoides] >Cluster-58773.160904;orf1 len=1941 frame:2 start:4337 end:10159 gi|566553581|emb|CDG41623.1| myos…	983.479	984.06	1017	1024	EEDKVNHL	0.081448	8
>Cluster-58773.160860;orf1 len=1941 frame:2 start:4361 end:10183 sp|P24733|MYS_ARGIR Myosin heavy chain, striated muscle OS=Argopecten irradians PE=1 SV=1 >Cluster-58773.160883;orf1 len=1941 frame:3 start:4323 end:10145 gi|566553581|emb|CDG41623.1| myosin heavy chain isoform A [Octopus bimaculoides] >Cluster-58773.160904;orf1 len=1941 frame:2 start:4337 end:10159 gi|566553581|emb|CDG41623.1| myos…	998.476	999.037	1831	1838	DSEQRRHA	0.171618	8
>Cluster-58773.160860;orf1 len=1941 frame:2 start:4361 end:10183 sp|P24733|MYS_ARGIR Myosin heavy chain, striated muscle OS=Argopecten irradians PE=1 SV=1 >Cluster-58773.160883;orf1 len=1941 frame:3 start:4323 end:10145 gi|566553581|emb|CDG41623.1| myosin heavy chain isoform A [Octopus bimaculoides] >Cluster-58773.160904;orf1 len=1941 frame:2 start:4337 end:10159 gi|566553581|emb|CDG41623.1| myos…	1020.47	1021.08	284	291	QQTVERNY	0.070382	8
>Cluster-58773.160860;orf1 len=1941 frame:2 start:4361 end:10183 sp|P24733|MYS_ARGIR Myosin heavy chain, striated muscle OS=Argopecten irradians PE=1 SV=1 >Cluster-58773.160883;orf1 len=1941 frame:3 start:4323 end:10145 gi|566553581|emb|CDG41623.1| myosin heavy chain isoform A [Octopus bimaculoides] >Cluster-58773.160904;orf1 len=1941 frame:2 start:4337 end:10159 gi|566553581|emb|CDG41623.1| myos…	1023.56	1024.17	454	461	DTKTKRQF	0.115198	8
>Cluster-58773.160860;orf1 len=1941 frame:2 start:4361 end:10183 sp|P24733|MYS_ARGIR Myosin heavy chain, striated muscle OS=Argopecten irradians PE=1 SV=1 >Cluster-58773.160883;orf1 len=1941 frame:3 start:4323 end:10145 gi|566553581|emb|CDG41623.1| myosin heavy chain isoform A [Octopus bimaculoides] >Cluster-58773.160904;orf1 len=1941 frame:2 start:4337 end:10159 gi|566553581|emb|CDG41623.1| myos…	1031.41	1032.08	1183	1191	EEGTMQHEA	0.0528685	9
>Cluster-58773.160860;orf1 len=1941 frame:2 start:4361 end:10183 sp|P24733|MYS_ARGIR Myosin heavy chain, striated muscle OS=Argopecten irradians PE=1 SV=1 >Cluster-58773.160883;orf1 len=1941 frame:3 start:4323 end:10145 gi|566553581|emb|CDG41623.1| myosin heavy chain isoform A [Octopus bimaculoides] >Cluster-58773.160904;orf1 len=1941 frame:2 start:4337 end:10159 gi|566553581|emb|CDG41623.1| myos…	1037.5	1038.11	284	291	QQTVERNY	0.070382	8
>Cluster-58773.160860;orf1 len=1941 frame:2 start:4361 end:10183 sp|P24733|MYS_ARGIR Myosin heavy chain, striated muscle OS=Argopecten irradians PE=1 SV=1 >Cluster-58773.160883;orf1 len=1941 frame:3 start:4323 end:10145 gi|566553581|emb|CDG41623.1| myosin heavy chain isoform A [Octopus bimaculoides] >Cluster-58773.160904;orf1 len=1941 frame:2 start:4337 end:10159 gi|566553581|emb|CDG41623.1| myos…	1044.58	1045.19	1168	1175	NKKREQEL	0.0482903	8
>Cluster-58773.160860;orf1 len=1941 frame:2 start:4361 end:10183 sp|P24733|MYS_ARGIR Myosin heavy chain, striated muscle OS=Argopecten irradians PE=1 SV=1 >Cluster-58773.160883;orf1 len=1941 frame:3 start:4323 end:10145 gi|566553581|emb|CDG41623.1| myosin heavy chain isoform A [Octopus bimaculoides] >Cluster-58773.160904;orf1 len=1941 frame:2 start:4337 end:10159 gi|566553581|emb|CDG41623.1| myos…	1045.64	1046.26	1782	1790	SVEKVRKSL	0.0893862	9
>Cluster-58773.160860;orf1 len=1941 frame:2 start:4361 end:10183 sp|P24733|MYS_ARGIR Myosin heavy chain, striated muscle OS=Argopecten irradians PE=1 SV=1 >Cluster-58773.160883;orf1 len=1941 frame:3 start:4323 end:10145 gi|566553581|emb|CDG41623.1| myosin heavy chain isoform A [Octopus bimaculoides] >Cluster-58773.160904;orf1 len=1941 frame:2 start:4337 end:10159 gi|566553581|emb|CDG41623.1| myos…	1045.65	1046.27	637	647	GGGKKKKGKSA	0.297914	11
>Cluster-58773.160860;orf1 len=1941 frame:2 start:4361 end:10183 sp|P24733|MYS_ARGIR Myosin heavy chain, striated muscle OS=Argopecten irradians PE=1 SV=1 >Cluster-58773.160883;orf1 len=1941 frame:3 start:4323 end:10145 gi|566553581|emb|CDG41623.1| myosin heavy chain isoform A [Octopus bimaculoides] >Cluster-58773.160904;orf1 len=1941 frame:2 start:4337 end:10159 gi|566553581|emb|CDG41623.1| myos…	1047.4	1048.08	1183	1191	EEGTMQHEA	0.0528685	9
>Cluster-58773.160860;orf1 len=1941 frame:2 start:4361 end:10183 sp|P24733|MYS_ARGIR Myosin heavy chain, striated muscle OS=Argopecten irradians PE=1 SV=1 >Cluster-58773.160883;orf1 len=1941 frame:3 start:4323 end:10145 gi|566553581|emb|CDG41623.1| myosin heavy chain isoform A [Octopus bimaculoides] >Cluster-58773.160904;orf1 len=1941 frame:2 start:4337 end:10159 gi|566553581|emb|CDG41623.1| myos…	1063.48	1064.17	778	785	EDMRDERL	0.284445	8
>Cluster-58773.160860;orf1 len=1941 frame:2 start:4361 end:10183 sp|P24733|MYS_ARGIR Myosin heavy chain, striated muscle OS=Argopecten irradians PE=1 SV=1 >Cluster-58773.160883;orf1 len=1941 frame:3 start:4323 end:10145 gi|566553581|emb|CDG41623.1| myosin heavy chain isoform A [Octopus bimaculoides] >Cluster-58773.160904;orf1 len=1941 frame:2 start:4337 end:10159 gi|566553581|emb|CDG41623.1| myos…	1069.5	1070.11	1521	1530	GEGGRNTHEI	0.13548	10
>Cluster-58773.160860;orf1 len=1941 frame:2 start:4361 end:10183 sp|P24733|MYS_ARGIR Myosin heavy chain, striated muscle OS=Argopecten irradians PE=1 SV=1 >Cluster-58773.160883;orf1 len=1941 frame:3 start:4323 end:10145 gi|566553581|emb|CDG41623.1| myosin heavy chain isoform A [Octopus bimaculoides] >Cluster-58773.160904;orf1 len=1941 frame:2 start:4337 end:10159 gi|566553581|emb|CDG41623.1| myos…	1079.4	1080.12	8	16	DPNDPDMEF	0.725963	9
>Cluster-58773.160860;orf1 len=1941 frame:2 start:4361 end:10183 sp|P24733|MYS_ARGIR Myosin heavy chain, striated muscle OS=Argopecten irradians PE=1 SV=1 >Cluster-58773.160883;orf1 len=1941 frame:3 start:4323 end:10145 gi|566553581|emb|CDG41623.1| myosin heavy chain isoform A [Octopus bimaculoides] >Cluster-58773.160904;orf1 len=1941 frame:2 start:4337 end:10159 gi|566553581|emb|CDG41623.1| myos…	1079.48	1080.17	778	785	EDMRDERL	0.284445	8
>Cluster-58773.160860;orf1 len=1941 frame:2 start:4361 end:10183 sp|P24733|MYS_ARGIR Myosin heavy chain, striated muscle OS=Argopecten irradians PE=1 SV=1 >Cluster-58773.160883;orf1 len=1941 frame:3 start:4323 end:10145 gi|566553581|emb|CDG41623.1| myosin heavy chain isoform A [Octopus bimaculoides] >Cluster-58773.160904;orf1 len=1941 frame:2 start:4337 end:10159 gi|566553581|emb|CDG41623.1| myos…	1095.39	1096.12	8	16	DPNDPDMEF	0.725963	9
>Cluster-58773.160860;orf1 len=1941 frame:2 start:4361 end:10183 sp|P24733|MYS_ARGIR Myosin heavy chain, striated muscle OS=Argopecten irradians PE=1 SV=1 >Cluster-58773.160883;orf1 len=1941 frame:3 start:4323 end:10145 gi|566553581|emb|CDG41623.1| myosin heavy chain isoform A [Octopus bimaculoides] >Cluster-58773.160904;orf1 len=1941 frame:2 start:4337 end:10159 gi|566553581|emb|CDG41623.1| myos…	1103.48	1104.19	169	177	QDRENQSML	0.231563	9
>Cluster-58773.160860;orf1 len=1941 frame:2 start:4361 end:10183 sp|P24733|MYS_ARGIR Myosin heavy chain, striated muscle OS=Argopecten irradians PE=1 SV=1 >Cluster-58773.160883;orf1 len=1941 frame:3 start:4323 end:10145 gi|566553581|emb|CDG41623.1| myosin heavy chain isoform A [Octopus bimaculoides] >Cluster-58773.160904;orf1 len=1941 frame:2 start:4337 end:10159 gi|566553581|emb|CDG41623.1| myos…	1117.66	1118.33	185	194	GKTENTKKVI	0.067075	10
>Cluster-58773.160860;orf1 len=1941 frame:2 start:4361 end:10183 sp|P24733|MYS_ARGIR Myosin heavy chain, striated muscle OS=Argopecten irradians PE=1 SV=1 >Cluster-58773.160883;orf1 len=1941 frame:3 start:4323 end:10145 gi|566553581|emb|CDG41623.1| myosin heavy chain isoform A [Octopus bimaculoides] >Cluster-58773.160904;orf1 len=1941 frame:2 start:4337 end:10159 gi|566553581|emb|CDG41623.1| myos…	1119.47	1120.19	169	177	QDRENQSML	0.231563	9
>Cluster-58773.160860;orf1 len=1941 frame:2 start:4361 end:10183 sp|P24733|MYS_ARGIR Myosin heavy chain, striated muscle OS=Argopecten irradians PE=1 SV=1 >Cluster-58773.160883;orf1 len=1941 frame:3 start:4323 end:10145 gi|566553581|emb|CDG41623.1| myosin heavy chain isoform A [Octopus bimaculoides] >Cluster-58773.160904;orf1 len=1941 frame:2 start:4337 end:10159 gi|566553581|emb|CDG41623.1| myos…	1120.51	1121.22	169	177	QDRENQSML	0.231563	9
>Cluster-58773.160860;orf1 len=1941 frame:2 start:4361 end:10183 sp|P24733|MYS_ARGIR Myosin heavy chain, striated muscle OS=Argopecten irradians PE=1 SV=1 >Cluster-58773.160883;orf1 len=1941 frame:3 start:4323 end:10145 gi|566553581|emb|CDG41623.1| myosin heavy chain isoform A [Octopus bimaculoides] >Cluster-58773.160904;orf1 len=1941 frame:2 start:4337 end:10159 gi|566553581|emb|CDG41623.1| myos…	1130.65	1131.33	1135	1143	KVEKQRTEL	0.0497161	9
>Cluster-58773.160860;orf1 len=1941 frame:2 start:4361 end:10183 sp|P24733|MYS_ARGIR Myosin heavy chain, striated muscle OS=Argopecten irradians PE=1 SV=1 >Cluster-58773.160883;orf1 len=1941 frame:3 start:4323 end:10145 gi|566553581|emb|CDG41623.1| myosin heavy chain isoform A [Octopus bimaculoides] >Cluster-58773.160904;orf1 len=1941 frame:2 start:4337 end:10159 gi|566553581|emb|CDG41623.1| myos…	1133.45	1134.28	350	358	TDEEKMSMY	0.110423	9
>Cluster-58773.160860;orf1 len=1941 frame:2 start:4361 end:10183 sp|P24733|MYS_ARGIR Myosin heavy chain, striated muscle OS=Argopecten irradians PE=1 SV=1 >Cluster-58773.160883;orf1 len=1941 frame:3 start:4323 end:10145 gi|566553581|emb|CDG41623.1| myosin heavy chain isoform A [Octopus bimaculoides] >Cluster-58773.160904;orf1 len=1941 frame:2 start:4337 end:10159 gi|566553581|emb|CDG41623.1| myos…	1136.5	1137.22	169	177	QDRENQSML	0.231563	9
>Cluster-58773.160860;orf1 len=1941 frame:2 start:4361 end:10183 sp|P24733|MYS_ARGIR Myosin heavy chain, striated muscle OS=Argopecten irradians PE=1 SV=1 >Cluster-58773.160883;orf1 len=1941 frame:3 start:4323 end:10145 gi|566553581|emb|CDG41623.1| myosin heavy chain isoform A [Octopus bimaculoides] >Cluster-58773.160904;orf1 len=1941 frame:2 start:4337 end:10159 gi|566553581|emb|CDG41623.1| myos…	1146.59	1147.24	1320	1329	KRSGEDEGRL	0.240642	10
>Cluster-58773.160860;orf1 len=1941 frame:2 start:4361 end:10183 sp|P24733|MYS_ARGIR Myosin heavy chain, striated muscle OS=Argopecten irradians PE=1 SV=1 >Cluster-58773.160883;orf1 len=1941 frame:3 start:4323 end:10145 gi|566553581|emb|CDG41623.1| myosin heavy chain isoform A [Octopus bimaculoides] >Cluster-58773.160904;orf1 len=1941 frame:2 start:4337 end:10159 gi|566553581|emb|CDG41623.1| myos…	1148.64	1149.3	1725	1734	STSNSQKRKL	0.213873	10
>Cluster-58773.160860;orf1 len=1941 frame:2 start:4361 end:10183 sp|P24733|MYS_ARGIR Myosin heavy chain, striated muscle OS=Argopecten irradians PE=1 SV=1 >Cluster-58773.160883;orf1 len=1941 frame:3 start:4323 end:10145 gi|566553581|emb|CDG41623.1| myosin heavy chain isoform A [Octopus bimaculoides] >Cluster-58773.160904;orf1 len=1941 frame:2 start:4337 end:10159 gi|566553581|emb|CDG41623.1| myos…	1149.44	1150.28	350	358	TDEEKMSMY	0.110423	9
>Cluster-58773.160860;orf1 len=1941 frame:2 start:4361 end:10183 sp|P24733|MYS_ARGIR Myosin heavy chain, striated muscle OS=Argopecten irradians PE=1 SV=1 >Cluster-58773.160883;orf1 len=1941 frame:3 start:4323 end:10145 gi|566553581|emb|CDG41623.1| myosin heavy chain isoform A [Octopus bimaculoides] >Cluster-58773.160904;orf1 len=1941 frame:2 start:4337 end:10159 gi|566553581|emb|CDG41623.1| myos…	1149.56	1150.23	1064	1073	KSTQETVEDL	0.0448333	10
>Cluster-58773.160860;orf1 len=1941 frame:2 start:4361 end:10183 sp|P24733|MYS_ARGIR Myosin heavy chain, striated muscle OS=Argopecten irradians PE=1 SV=1 >Cluster-58773.160883;orf1 len=1941 frame:3 start:4323 end:10145 gi|566553581|emb|CDG41623.1| myosin heavy chain isoform A [Octopus bimaculoides] >Cluster-58773.160904;orf1 len=1941 frame:2 start:4337 end:10159 gi|566553581|emb|CDG41623.1| myos…	1162.6	1163.35	869	877	RCEQTRKEL	0.14745	9
>Cluster-58773.160860;orf1 len=1941 frame:2 start:4361 end:10183 sp|P24733|MYS_ARGIR Myosin heavy chain, striated muscle OS=Argopecten irradians PE=1 SV=1 >Cluster-58773.160883;orf1 len=1941 frame:3 start:4323 end:10145 gi|566553581|emb|CDG41623.1| myosin heavy chain isoform A [Octopus bimaculoides] >Cluster-58773.160904;orf1 len=1941 frame:2 start:4337 end:10159 gi|566553581|emb|CDG41623.1| myos…	1165.44	1166.28	350	358	TDEEKMSMY	0.110423	9
>Cluster-58773.160860;orf1 len=1941 frame:2 start:4361 end:10183 sp|P24733|MYS_ARGIR Myosin heavy chain, striated muscle OS=Argopecten irradians PE=1 SV=1 >Cluster-58773.160883;orf1 len=1941 frame:3 start:4323 end:10145 gi|566553581|emb|CDG41623.1| myosin heavy chain isoform A [Octopus bimaculoides] >Cluster-58773.160904;orf1 len=1941 frame:2 start:4337 end:10159 gi|566553581|emb|CDG41623.1| myos…	1193.52	1194.2	1352	1361	EEEQESKSDL	0.0543426	10
>Cluster-58773.160860;orf1 len=1941 frame:2 start:4361 end:10183 sp|P24733|MYS_ARGIR Myosin heavy chain, striated muscle OS=Argopecten irradians PE=1 SV=1 >Cluster-58773.160883;orf1 len=1941 frame:3 start:4323 end:10145 gi|566553581|emb|CDG41623.1| myosin heavy chain isoform A [Octopus bimaculoides] >Cluster-58773.160904;orf1 len=1941 frame:2 start:4337 end:10159 gi|566553581|emb|CDG41623.1| myos…	1228.58	1229.3	1658	1667	QSQVEEEQRL	0.144706	10
>Cluster-58773.160860;orf1 len=1941 frame:2 start:4361 end:10183 sp|P24733|MYS_ARGIR Myosin heavy chain, striated muscle OS=Argopecten irradians PE=1 SV=1 >Cluster-58773.160883;orf1 len=1941 frame:3 start:4323 end:10145 gi|566553581|emb|CDG41623.1| myosin heavy chain isoform A [Octopus bimaculoides] >Cluster-58773.160904;orf1 len=1941 frame:2 start:4337 end:10159 gi|566553581|emb|CDG41623.1| myos…	1245.61	1246.33	1658	1667	QSQVEEEQRL	0.144706	10
>Cluster-58773.160860;orf1 len=1941 frame:2 start:4361 end:10183 sp|P24733|MYS_ARGIR Myosin heavy chain, striated muscle OS=Argopecten irradians PE=1 SV=1 >Cluster-58773.160883;orf1 len=1941 frame:3 start:4323 end:10145 gi|566553581|emb|CDG41623.1| myosin heavy chain isoform A [Octopus bimaculoides] >Cluster-58773.160904;orf1 len=1941 frame:2 start:4337 end:10159 gi|566553581|emb|CDG41623.1| myos…	1263.71	1264.48	617	627	QNSKEHVVKVL	0.173588	11
>Cluster-58773.160860;orf1 len=1941 frame:2 start:4361 end:10183 sp|P24733|MYS_ARGIR Myosin heavy chain, striated muscle OS=Argopecten irradians PE=1 SV=1 >Cluster-58773.160883;orf1 len=1941 frame:3 start:4323 end:10145 gi|566553581|emb|CDG41623.1| myosin heavy chain isoform A [Octopus bimaculoides] >Cluster-58773.160904;orf1 len=1941 frame:2 start:4337 end:10159 gi|566553581|emb|CDG41623.1| myos…	1267.64	1268.35	1588	1597	DNTRRNHQRA	0.112391	10
>Cluster-58773.160860;orf1 len=1941 frame:2 start:4361 end:10183 sp|P24733|MYS_ARGIR Myosin heavy chain, striated muscle OS=Argopecten irradians PE=1 SV=1 >Cluster-58773.160883;orf1 len=1941 frame:3 start:4323 end:10145 gi|566553581|emb|CDG41623.1| myosin heavy chain isoform A [Octopus bimaculoides] >Cluster-58773.160904;orf1 len=1941 frame:2 start:4337 end:10159 gi|566553581|emb|CDG41623.1| myos…	1280.73	1281.51	617	627	QNSKEHVVKVL	0.173588	11
>Cluster-58773.160860;orf1 len=1941 frame:2 start:4361 end:10183 sp|P24733|MYS_ARGIR Myosin heavy chain, striated muscle OS=Argopecten irradians PE=1 SV=1 >Cluster-58773.160883;orf1 len=1941 frame:3 start:4323 end:10145 gi|566553581|emb|CDG41623.1| myosin heavy chain isoform A [Octopus bimaculoides] >Cluster-58773.160904;orf1 len=1941 frame:2 start:4337 end:10159 gi|566553581|emb|CDG41623.1| myos…	1291.54	1292.37	1491	1502	QCEEVGDTVESL	0.115088	12
>Cluster-58773.160860;orf1 len=1941 frame:2 start:4361 end:10183 sp|P24733|MYS_ARGIR Myosin heavy chain, striated muscle OS=Argopecten irradians PE=1 SV=1 >Cluster-58773.160883;orf1 len=1941 frame:3 start:4323 end:10145 gi|566553581|emb|CDG41623.1| myosin heavy chain isoform A [Octopus bimaculoides] >Cluster-58773.160904;orf1 len=1941 frame:2 start:4337 end:10159 gi|566553581|emb|CDG41623.1| myos…	1308.56	1309.4	1491	1502	QCEEVGDTVESL	0.115088	12
>Cluster-58773.160860;orf1 len=1941 frame:2 start:4361 end:10183 sp|P24733|MYS_ARGIR Myosin heavy chain, striated muscle OS=Argopecten irradians PE=1 SV=1 >Cluster-58773.160883;orf1 len=1941 frame:3 start:4323 end:10145 gi|566553581|emb|CDG41623.1| myosin heavy chain isoform A [Octopus bimaculoides] >Cluster-58773.160904;orf1 len=1941 frame:2 start:4337 end:10159 gi|566553581|emb|CDG41623.1| myos…	1320.73	1321.53	570	582	GKPKPPKPGQSEA	0.425616	13
>Cluster-58773.160860;orf1 len=1941 frame:2 start:4361 end:10183 sp|P24733|MYS_ARGIR Myosin heavy chain, striated muscle OS=Argopecten irradians PE=1 SV=1 >Cluster-58773.160883;orf1 len=1941 frame:3 start:4323 end:10145 gi|566553581|emb|CDG41623.1| myosin heavy chain isoform A [Octopus bimaculoides] >Cluster-58773.160904;orf1 len=1941 frame:2 start:4337 end:10159 gi|566553581|emb|CDG41623.1| myos…	1324.67	1325.44	242	252	KTTRNNNSSRF	0.109906	11
>Cluster-58773.160860;orf1 len=1941 frame:2 start:4361 end:10183 sp|P24733|MYS_ARGIR Myosin heavy chain, striated muscle OS=Argopecten irradians PE=1 SV=1 >Cluster-58773.160883;orf1 len=1941 frame:3 start:4323 end:10145 gi|566553581|emb|CDG41623.1| myosin heavy chain isoform A [Octopus bimaculoides] >Cluster-58773.160904;orf1 len=1941 frame:2 start:4337 end:10159 gi|566553581|emb|CDG41623.1| myos…	1351.63	1352.58	1081	1091	EDGMRKKDMEI	0.140187	11
>Cluster-58773.160860;orf1 len=1941 frame:2 start:4361 end:10183 sp|P24733|MYS_ARGIR Myosin heavy chain, striated muscle OS=Argopecten irradians PE=1 SV=1 >Cluster-58773.160883;orf1 len=1941 frame:3 start:4323 end:10145 gi|566553581|emb|CDG41623.1| myosin heavy chain isoform A [Octopus bimaculoides] >Cluster-58773.160904;orf1 len=1941 frame:2 start:4337 end:10159 gi|566553581|emb|CDG41623.1| myos…	1367.63	1368.58	1081	1091	EDGMRKKDMEI	0.140187	11
>Cluster-58773.160860;orf1 len=1941 frame:2 start:4361 end:10183 sp|P24733|MYS_ARGIR Myosin heavy chain, striated muscle OS=Argopecten irradians PE=1 SV=1 >Cluster-58773.160883;orf1 len=1941 frame:3 start:4323 end:10145 gi|566553581|emb|CDG41623.1| myosin heavy chain isoform A [Octopus bimaculoides] >Cluster-58773.160904;orf1 len=1941 frame:2 start:4337 end:10159 gi|566553581|emb|CDG41623.1| myos…	1381.63	1382.6	920	930	ESQMKEMEEKL	0.161955	11
>Cluster-58773.160860;orf1 len=1941 frame:2 start:4361 end:10183 sp|P24733|MYS_ARGIR Myosin heavy chain, striated muscle OS=Argopecten irradians PE=1 SV=1 >Cluster-58773.160883;orf1 len=1941 frame:3 start:4323 end:10145 gi|566553581|emb|CDG41623.1| myosin heavy chain isoform A [Octopus bimaculoides] >Cluster-58773.160904;orf1 len=1941 frame:2 start:4337 end:10159 gi|566553581|emb|CDG41623.1| myos…	1383.62	1384.58	1081	1091	EDGMRKKDMEI	0.140187	11
>Cluster-58773.160860;orf1 len=1941 frame:2 start:4361 end:10183 sp|P24733|MYS_ARGIR Myosin heavy chain, striated muscle OS=Argopecten irradians PE=1 SV=1 >Cluster-58773.160883;orf1 len=1941 frame:3 start:4323 end:10145 gi|566553581|emb|CDG41623.1| myosin heavy chain isoform A [Octopus bimaculoides] >Cluster-58773.160904;orf1 len=1941 frame:2 start:4337 end:10159 gi|566553581|emb|CDG41623.1| myos…	1397.63	1398.6	920	930	ESQMKEMEEKL	0.161955	11
>Cluster-58773.160860;orf1 len=1941 frame:2 start:4361 end:10183 sp|P24733|MYS_ARGIR Myosin heavy chain, striated muscle OS=Argopecten irradians PE=1 SV=1 >Cluster-58773.160883;orf1 len=1941 frame:3 start:4323 end:10145 gi|566553581|emb|CDG41623.1| myosin heavy chain isoform A [Octopus bimaculoides] >Cluster-58773.160904;orf1 len=1941 frame:2 start:4337 end:10159 gi|566553581|emb|CDG41623.1| myos…	1413.62	1414.6	920	930	ESQMKEMEEKL	0.161955	11
>Cluster-58773.160860;orf1 len=1941 frame:2 start:4361 end:10183 sp|P24733|MYS_ARGIR Myosin heavy chain, striated muscle OS=Argopecten irradians PE=1 SV=1 >Cluster-58773.160883;orf1 len=1941 frame:3 start:4323 end:10145 gi|566553581|emb|CDG41623.1| myosin heavy chain isoform A [Octopus bimaculoides] >Cluster-58773.160904;orf1 len=1941 frame:2 start:4337 end:10159 gi|566553581|emb|CDG41623.1| myos…	1463.67	1464.6	53	66	QSTKGDEVTVKCDA	0.095015	14
>Cluster-58773.160860;orf1 len=1941 frame:2 start:4361 end:10183 sp|P24733|MYS_ARGIR Myosin heavy chain, striated muscle OS=Argopecten irradians PE=1 SV=1 >Cluster-58773.160883;orf1 len=1941 frame:3 start:4323 end:10145 gi|566553581|emb|CDG41623.1| myosin heavy chain isoform A [Octopus bimaculoides] >Cluster-58773.160904;orf1 len=1941 frame:2 start:4337 end:10159 gi|566553581|emb|CDG41623.1| myos…	1480.69	1481.63	53	66	QSTKGDEVTVKCDA	0.095015	14
>Cluster-58773.160860;orf1 len=1941 frame:2 start:4361 end:10183 sp|P24733|MYS_ARGIR Myosin heavy chain, striated muscle OS=Argopecten irradians PE=1 SV=1 >Cluster-58773.160883;orf1 len=1941 frame:3 start:4323 end:10145 gi|566553581|emb|CDG41623.1| myosin heavy chain isoform A [Octopus bimaculoides] >Cluster-58773.160904;orf1 len=1941 frame:2 start:4337 end:10159 gi|566553581|emb|CDG41623.1| myos…	1548.79	1549.69	967	979	KSEQEKTTKDNQI	0.0482844	13
>Cluster-58773.160860;orf1 len=1941 frame:2 start:4361 end:10183 sp|P24733|MYS_ARGIR Myosin heavy chain, striated muscle OS=Argopecten irradians PE=1 SV=1 >Cluster-58773.160883;orf1 len=1941 frame:3 start:4323 end:10145 gi|566553581|emb|CDG41623.1| myosin heavy chain isoform A [Octopus bimaculoides] >Cluster-58773.160904;orf1 len=1941 frame:2 start:4337 end:10159 gi|566553581|emb|CDG41623.1| myos…	1588.82	1589.82	417	430	VTQGRNKNQVMNSI	0.0857632	14
>Cluster-58773.160860;orf1 len=1941 frame:2 start:4361 end:10183 sp|P24733|MYS_ARGIR Myosin heavy chain, striated muscle OS=Argopecten irradians PE=1 SV=1 >Cluster-58773.160883;orf1 len=1941 frame:3 start:4323 end:10145 gi|566553581|emb|CDG41623.1| myosin heavy chain isoform A [Octopus bimaculoides] >Cluster-58773.160904;orf1 len=1941 frame:2 start:4337 end:10159 gi|566553581|emb|CDG41623.1| myos…	1604.82	1605.82	417	430	VTQGRNKNQVMNSI	0.0857632	14
>Cluster-58773.160860;orf1 len=1941 frame:2 start:4361 end:10183 sp|P24733|MYS_ARGIR Myosin heavy chain, striated muscle OS=Argopecten irradians PE=1 SV=1 >Cluster-58773.160883;orf1 len=1941 frame:3 start:4323 end:10145 gi|566553581|emb|CDG41623.1| myosin heavy chain isoform A [Octopus bimaculoides] >Cluster-58773.160904;orf1 len=1941 frame:2 start:4337 end:10159 gi|566553581|emb|CDG41623.1| myos…	1724.79	1725.89	848	860	RQEDEMKKQQEEF	0.067451	13
>Cluster-58773.160860;orf1 len=1941 frame:2 start:4361 end:10183 sp|P24733|MYS_ARGIR Myosin heavy chain, striated muscle OS=Argopecten irradians PE=1 SV=1 >Cluster-58773.160883;orf1 len=1941 frame:3 start:4323 end:10145 gi|566553581|emb|CDG41623.1| myosin heavy chain isoform A [Octopus bimaculoides] >Cluster-58773.160904;orf1 len=1941 frame:2 start:4337 end:10159 gi|566553581|emb|CDG41623.1| myos…	1740.79	1741.89	848	860	RQEDEMKKQQEEF	0.067451	13
>Cluster-58773.160860;orf1 len=1941 frame:2 start:4361 end:10183 sp|P24733|MYS_ARGIR Myosin heavy chain, striated muscle OS=Argopecten irradians PE=1 SV=1 >Cluster-58773.160883;orf1 len=1941 frame:3 start:4323 end:10145 gi|566553581|emb|CDG41623.1| myosin heavy chain isoform A [Octopus bimaculoides] >Cluster-58773.160904;orf1 len=1941 frame:2 start:4337 end:10159 gi|566553581|emb|CDG41623.1| myos…	1786.98	1788.03	1049	1063	RGDVEKSKRKVEQDL	0.130673	15
>Cluster-58773.160860;orf1 len=1941 frame:2 start:4361 end:10183 sp|P24733|MYS_ARGIR Myosin heavy chain, striated muscle OS=Argopecten irradians PE=1 SV=1 >Cluster-58773.160883;orf1 len=1941 frame:3 start:4323 end:10145 gi|566553581|emb|CDG41623.1| myosin heavy chain isoform A [Octopus bimaculoides] >Cluster-58773.160904;orf1 len=1941 frame:2 start:4337 end:10159 gi|566553581|emb|CDG41623.1| myos…	1938.87	1940.07	1857	1871	QQDEDRKNHERMQEL	0.234049	15
>Cluster-58773.160860;orf1 len=1941 frame:2 start:4361 end:10183 sp|P24733|MYS_ARGIR Myosin heavy chain, striated muscle OS=Argopecten irradians PE=1 SV=1 >Cluster-58773.160883;orf1 len=1941 frame:3 start:4323 end:10145 gi|566553581|emb|CDG41623.1| myosin heavy chain isoform A [Octopus bimaculoides] >Cluster-58773.160904;orf1 len=1941 frame:2 start:4337 end:10159 gi|566553581|emb|CDG41623.1| myos…	1954.87	1956.07	1857	1871	QQDEDRKNHERMQEL	0.234049	15
>Cluster-58773.160860;orf1 len=1941 frame:2 start:4361 end:10183 sp|P24733|MYS_ARGIR Myosin heavy chain, striated muscle OS=Argopecten irradians PE=1 SV=1 >Cluster-58773.160883;orf1 len=1941 frame:3 start:4323 end:10145 gi|566553581|emb|CDG41623.1| myosin heavy chain isoform A [Octopus bimaculoides] >Cluster-58773.160904;orf1 len=1941 frame:2 start:4337 end:10159 gi|566553581|emb|CDG41623.1| myos…	1955.9	1957.1	1857	1871	QQDEDRKNHERMQEL	0.234049	15
>Cluster-58773.160860;orf1 len=1941 frame:2 start:4361 end:10183 sp|P24733|MYS_ARGIR Myosin heavy chain, striated muscle OS=Argopecten irradians PE=1 SV=1 >Cluster-58773.160883;orf1 len=1941 frame:3 start:4323 end:10145 gi|566553581|emb|CDG41623.1| myosin heavy chain isoform A [Octopus bimaculoides] >Cluster-58773.160904;orf1 len=1941 frame:2 start:4337 end:10159 gi|566553581|emb|CDG41623.1| myos…	1971.89	1973.1	1857	1871	QQDEDRKNHERMQEL	0.234049	15
>Cluster-58773.160860;orf1 len=1941 frame:2 start:4361 end:10183 sp|P24733|MYS_ARGIR Myosin heavy chain, striated muscle OS=Argopecten irradians PE=1 SV=1 >Cluster-58773.160883;orf1 len=1941 frame:3 start:4323 end:10145 gi|566553581|emb|CDG41623.1| myosin heavy chain isoform A [Octopus bimaculoides] >Cluster-58773.160904;orf1 len=1941 frame:2 start:4337 end:10159 gi|566553581|emb|CDG41623.1| myos…	2003.12	2004.38	1839	1854	ETQKSMRKVDRRVKEL	0.082706	16
>Cluster-58773.160860;orf1 len=1941 frame:2 start:4361 end:10183 sp|P24733|MYS_ARGIR Myosin heavy chain, striated muscle OS=Argopecten irradians PE=1 SV=1 >Cluster-58773.160883;orf1 len=1941 frame:3 start:4323 end:10145 gi|566553581|emb|CDG41623.1| myosin heavy chain isoform A [Octopus bimaculoides] >Cluster-58773.160904;orf1 len=1941 frame:2 start:4337 end:10159 gi|566553581|emb|CDG41623.1| myos…	2019.11	2020.38	1839	1854	ETQKSMRKVDRRVKEL	0.082706	16
>Cluster-58773.160860;orf1 len=1941 frame:2 start:4361 end:10183 sp|P24733|MYS_ARGIR Myosin heavy chain, striated muscle OS=Argopecten irradians PE=1 SV=1 >Cluster-58773.160883;orf1 len=1941 frame:3 start:4323 end:10145 gi|566553581|emb|CDG41623.1| myosin heavy chain isoform A [Octopus bimaculoides] >Cluster-58773.160904;orf1 len=1941 frame:2 start:4337 end:10159 gi|566553581|emb|CDG41623.1| myos…	2134.98	2136.45	1240	1258	EHVGKNRGCSDKMSKQMEA	0.3651	19
>Cluster-58773.160860;orf1 len=1941 frame:2 start:4361 end:10183 sp|P24733|MYS_ARGIR Myosin heavy chain, striated muscle OS=Argopecten irradians PE=1 SV=1 >Cluster-58773.160883;orf1 len=1941 frame:3 start:4323 end:10145 gi|566553581|emb|CDG41623.1| myosin heavy chain isoform A [Octopus bimaculoides] >Cluster-58773.160904;orf1 len=1941 frame:2 start:4337 end:10159 gi|566553581|emb|CDG41623.1| myos…	2150.97	2152.45	1240	1258	EHVGKNRGCSDKMSKQMEA	0.3651	19
>Cluster-58773.160860;orf1 len=1941 frame:2 start:4361 end:10183 sp|P24733|MYS_ARGIR Myosin heavy chain, striated muscle OS=Argopecten irradians PE=1 SV=1 >Cluster-58773.160883;orf1 len=1941 frame:3 start:4323 end:10145 gi|566553581|emb|CDG41623.1| myosin heavy chain isoform A [Octopus bimaculoides] >Cluster-58773.160904;orf1 len=1941 frame:2 start:4337 end:10159 gi|566553581|emb|CDG41623.1| myos…	2166.97	2168.45	1240	1258	EHVGKNRGCSDKMSKQMEA	0.3651	19
>Cluster-58773.160860;orf1 len=1941 frame:2 start:4361 end:10183 sp|P24733|MYS_ARGIR Myosin heavy chain, striated muscle OS=Argopecten irradians PE=1 SV=1 >Cluster-58773.160883;orf1 len=1941 frame:3 start:4323 end:10145 gi|566553581|emb|CDG41623.1| myosin heavy chain isoform A [Octopus bimaculoides] >Cluster-58773.160904;orf1 len=1941 frame:2 start:4337 end:10159 gi|566553581|emb|CDG41623.1| myos…	2347.28	2348.68	205	224	DGKKKKDDEEKKKDEKKGTL	0.39118	20
>tr|Q9BJ58|Q9BJ58_ENTDO Hemocyanin G-type (Fragment) OS=Enteroctopus dofleini OX=267067 PE=4 SV=2	802.395	802.873	2335	2340	QEHRHL	0.222317	6
>tr|Q9BJ58|Q9BJ58_ENTDO Hemocyanin G-type (Fragment) OS=Enteroctopus dofleini OX=267067 PE=4 SV=2	806.314	806.877	2859	2865	GGEHEMF	0.570008	7
>tr|Q9BJ58|Q9BJ58_ENTDO Hemocyanin G-type (Fragment) OS=Enteroctopus dofleini OX=267067 PE=4 SV=2	816.432	816.897	2534	2540	RNNVNSL	0.124615	7
>tr|Q9BJ58|Q9BJ58_ENTDO Hemocyanin G-type (Fragment) OS=Enteroctopus dofleini OX=267067 PE=4 SV=2	819.422	819.904	2335	2340	QEHRHL	0.222317	6
>tr|Q9BJ58|Q9BJ58_ENTDO Hemocyanin G-type (Fragment) OS=Enteroctopus dofleini OX=267067 PE=4 SV=2	819.436	819.941	424	430	PRPTVSY	0.189805	7
>tr|Q9BJ58|Q9BJ58_ENTDO Hemocyanin G-type (Fragment) OS=Enteroctopus dofleini OX=267067 PE=4 SV=2	822.309	822.877	2859	2865	GGEHEMF	0.570008	7
>tr|Q9BJ58|Q9BJ58_ENTDO Hemocyanin G-type (Fragment) OS=Enteroctopus dofleini OX=267067 PE=4 SV=2	822.366	822.918	2603	2609	TKQMEDA	0.0541362	7
>tr|Q9BJ58|Q9BJ58_ENTDO Hemocyanin G-type (Fragment) OS=Enteroctopus dofleini OX=267067 PE=4 SV=2	832.452	832.937	1654	1661	RGVTEVTA	0.0332172	8
>tr|Q9BJ58|Q9BJ58_ENTDO Hemocyanin G-type (Fragment) OS=Enteroctopus dofleini OX=267067 PE=4 SV=2	835.398	835.96	1224	1230	TQQMKEA	0.0603143	7
>tr|Q9BJ58|Q9BJ58_ENTDO Hemocyanin G-type (Fragment) OS=Enteroctopus dofleini OX=267067 PE=4 SV=2	837.458	837.96	689	695	SEVHRPL	0.307476	7
>tr|Q9BJ58|Q9BJ58_ENTDO Hemocyanin G-type (Fragment) OS=Enteroctopus dofleini OX=267067 PE=4 SV=2	838.361	838.917	2603	2609	TKQMEDA	0.0541362	7
>tr|Q9BJ58|Q9BJ58_ENTDO Hemocyanin G-type (Fragment) OS=Enteroctopus dofleini OX=267067 PE=4 SV=2	848.429	849.002	736	743	GGMSVREL	0.331735	8
>tr|Q9BJ58|Q9BJ58_ENTDO Hemocyanin G-type (Fragment) OS=Enteroctopus dofleini OX=267067 PE=4 SV=2	851.393	851.959	1224	1230	TQQMKEA	0.0603143	7
>tr|Q9BJ58|Q9BJ58_ENTDO Hemocyanin G-type (Fragment) OS=Enteroctopus dofleini OX=267067 PE=4 SV=2	853.376	853.975	1963	1969	SKPEDMF	0.704257	7
>tr|Q9BJ58|Q9BJ58_ENTDO Hemocyanin G-type (Fragment) OS=Enteroctopus dofleini OX=267067 PE=4 SV=2	856.416	856.916	1886	1893	GGKEEHSL	0.100101	8
>tr|Q9BJ58|Q9BJ58_ENTDO Hemocyanin G-type (Fragment) OS=Enteroctopus dofleini OX=267067 PE=4 SV=2	859.474	859.966	588	594	RNVDSRL	0.198041	7
>tr|Q9BJ58|Q9BJ58_ENTDO Hemocyanin G-type (Fragment) OS=Enteroctopus dofleini OX=267067 PE=4 SV=2	860.445	861.06	1517	1523	NVPMRPF	0.853557	7
>tr|Q9BJ58|Q9BJ58_ENTDO Hemocyanin G-type (Fragment) OS=Enteroctopus dofleini OX=267067 PE=4 SV=2	860.472	860.989	2494	2501	ETVDGKVL	0.0771665	8
>tr|Q9BJ58|Q9BJ58_ENTDO Hemocyanin G-type (Fragment) OS=Enteroctopus dofleini OX=267067 PE=4 SV=2	862.46	863.076	1105	1111	RKPMSPF	0.808003	7
>tr|Q9BJ58|Q9BJ58_ENTDO Hemocyanin G-type (Fragment) OS=Enteroctopus dofleini OX=267067 PE=4 SV=2	864.356	864.958	2041	2048	GGSTEMPW	0.676037	8
>tr|Q9BJ58|Q9BJ58_ENTDO Hemocyanin G-type (Fragment) OS=Enteroctopus dofleini OX=267067 PE=4 SV=2	864.424	865.002	736	743	GGMSVREL	0.331735	8
>tr|Q9BJ58|Q9BJ58_ENTDO Hemocyanin G-type (Fragment) OS=Enteroctopus dofleini OX=267067 PE=4 SV=2	867.34	867.912	1294	1301	TDGDMESL	0.183465	8
>tr|Q9BJ58|Q9BJ58_ENTDO Hemocyanin G-type (Fragment) OS=Enteroctopus dofleini OX=267067 PE=4 SV=2	869.371	869.974	1963	1969	SKPEDMF	0.704257	7
>tr|Q9BJ58|Q9BJ58_ENTDO Hemocyanin G-type (Fragment) OS=Enteroctopus dofleini OX=267067 PE=4 SV=2	873.49	873.993	2117	2123	RRNVESL	0.0766867	7
>tr|Q9BJ58|Q9BJ58_ENTDO Hemocyanin G-type (Fragment) OS=Enteroctopus dofleini OX=267067 PE=4 SV=2	876.44	877.059	1517	1523	NVPMRPF	0.853557	7
>tr|Q9BJ58|Q9BJ58_ENTDO Hemocyanin G-type (Fragment) OS=Enteroctopus dofleini OX=267067 PE=4 SV=2	878.455	879.075	1105	1111	RKPMSPF	0.808003	7
>tr|Q9BJ58|Q9BJ58_ENTDO Hemocyanin G-type (Fragment) OS=Enteroctopus dofleini OX=267067 PE=4 SV=2	880.351	880.957	2041	2048	GGSTEMPW	0.676037	8
>tr|Q9BJ58|Q9BJ58_ENTDO Hemocyanin G-type (Fragment) OS=Enteroctopus dofleini OX=267067 PE=4 SV=2	881.448	881.97	1680	1687	VPKQDHSA	0.111304	8
>tr|Q9BJ58|Q9BJ58_ENTDO Hemocyanin G-type (Fragment) OS=Enteroctopus dofleini OX=267067 PE=4 SV=2	883.335	883.912	1294	1301	TDGDMESL	0.183465	8
>tr|Q9BJ58|Q9BJ58_ENTDO Hemocyanin G-type (Fragment) OS=Enteroctopus dofleini OX=267067 PE=4 SV=2	885.429	886.067	268	274	HKPMEPF	0.734071	7
>tr|Q9BJ58|Q9BJ58_ENTDO Hemocyanin G-type (Fragment) OS=Enteroctopus dofleini OX=267067 PE=4 SV=2	886.42	887.011	1529	1535	NHDRMTL	0.363662	7
>tr|Q9BJ58|Q9BJ58_ENTDO Hemocyanin G-type (Fragment) OS=Enteroctopus dofleini OX=267067 PE=4 SV=2	891.403	892.027	1621	1628	GGKSEMPW	0.634589	8
>tr|Q9BJ58|Q9BJ58_ENTDO Hemocyanin G-type (Fragment) OS=Enteroctopus dofleini OX=267067 PE=4 SV=2	901.424	902.066	268	274	HKPMEPF	0.734071	7
>tr|Q9BJ58|Q9BJ58_ENTDO Hemocyanin G-type (Fragment) OS=Enteroctopus dofleini OX=267067 PE=4 SV=2	902.415	903.01	1529	1535	NHDRMTL	0.363662	7
>tr|Q9BJ58|Q9BJ58_ENTDO Hemocyanin G-type (Fragment) OS=Enteroctopus dofleini OX=267067 PE=4 SV=2	905.346	905.967	2449	2456	GGDNEMPW	0.778264	8
>tr|Q9BJ58|Q9BJ58_ENTDO Hemocyanin G-type (Fragment) OS=Enteroctopus dofleini OX=267067 PE=4 SV=2	907.398	908.027	1621	1628	GGKSEMPW	0.634589	8
>tr|Q9BJ58|Q9BJ58_ENTDO Hemocyanin G-type (Fragment) OS=Enteroctopus dofleini OX=267067 PE=4 SV=2	913.416	913.971	2818	2824	QHEDRVF	0.372931	7
>tr|Q9BJ58|Q9BJ58_ENTDO Hemocyanin G-type (Fragment) OS=Enteroctopus dofleini OX=267067 PE=4 SV=2	916.398	917.037	372	379	GGVHEMTW	0.479901	8
>tr|Q9BJ58|Q9BJ58_ENTDO Hemocyanin G-type (Fragment) OS=Enteroctopus dofleini OX=267067 PE=4 SV=2	921.341	921.966	2449	2456	GGDNEMPW	0.778264	8
>tr|Q9BJ58|Q9BJ58_ENTDO Hemocyanin G-type (Fragment) OS=Enteroctopus dofleini OX=267067 PE=4 SV=2	923.393	924.026	791	798	GGSKEMEW	0.438552	8
>tr|Q9BJ58|Q9BJ58_ENTDO Hemocyanin G-type (Fragment) OS=Enteroctopus dofleini OX=267067 PE=4 SV=2	930.443	931.002	2818	2824	QHEDRVF	0.372931	7
>tr|Q9BJ58|Q9BJ58_ENTDO Hemocyanin G-type (Fragment) OS=Enteroctopus dofleini OX=267067 PE=4 SV=2	932.393	933.037	372	379	GGVHEMTW	0.479901	8
>tr|Q9BJ58|Q9BJ58_ENTDO Hemocyanin G-type (Fragment) OS=Enteroctopus dofleini OX=267067 PE=4 SV=2	939.388	940.025	791	798	GGSKEMEW	0.438552	8
>tr|Q9BJ58|Q9BJ58_ENTDO Hemocyanin G-type (Fragment) OS=Enteroctopus dofleini OX=267067 PE=4 SV=2	955.4	955.959	1690	1697	KSEEGNEY	0.0637241	8
>tr|Q9BJ58|Q9BJ58_ENTDO Hemocyanin G-type (Fragment) OS=Enteroctopus dofleini OX=267067 PE=4 SV=2	977.491	978.062	1072	1079	HHSNVDRI	0.211871	8
>tr|Q9BJ58|Q9BJ58_ENTDO Hemocyanin G-type (Fragment) OS=Enteroctopus dofleini OX=267067 PE=4 SV=2	977.491	978.062	1908	1915	HHSNVDRL	0.329543	8
>tr|Q9BJ58|Q9BJ58_ENTDO Hemocyanin G-type (Fragment) OS=Enteroctopus dofleini OX=267067 PE=4 SV=2	979.47	980.034	2729	2736	HHSNTDRI	0.233481	8
>tr|Q9BJ58|Q9BJ58_ENTDO Hemocyanin G-type (Fragment) OS=Enteroctopus dofleini OX=267067 PE=4 SV=2	984.374	985.198	506	514	CCVHGMSTF	0.712209	9
>tr|Q9BJ58|Q9BJ58_ENTDO Hemocyanin G-type (Fragment) OS=Enteroctopus dofleini OX=267067 PE=4 SV=2	991.507	992.089	660	667	HHSQVDRL	0.282885	8
>tr|Q9BJ58|Q9BJ58_ENTDO Hemocyanin G-type (Fragment) OS=Enteroctopus dofleini OX=267067 PE=4 SV=2	991.507	992.089	236	243	HHSNVERL	0.275042	8
>tr|Q9BJ58|Q9BJ58_ENTDO Hemocyanin G-type (Fragment) OS=Enteroctopus dofleini OX=267067 PE=4 SV=2	993.438	994.181	78	87	PDGSTVVCCL	0.659001	10
>tr|Q9BJ58|Q9BJ58_ENTDO Hemocyanin G-type (Fragment) OS=Enteroctopus dofleini OX=267067 PE=4 SV=2	1000.37	1001.2	506	514	CCVHGMSTF	0.712209	9
>tr|Q9BJ58|Q9BJ58_ENTDO Hemocyanin G-type (Fragment) OS=Enteroctopus dofleini OX=267067 PE=4 SV=2	1013.36	1014.08	2434	2442	CKDETCEDA	0.108759	9
>tr|Q9BJ58|Q9BJ58_ENTDO Hemocyanin G-type (Fragment) OS=Enteroctopus dofleini OX=267067 PE=4 SV=2	1013.62	1014.22	1699	1706	VRKNVERL	0.125128	8
>tr|Q9BJ58|Q9BJ58_ENTDO Hemocyanin G-type (Fragment) OS=Enteroctopus dofleini OX=267067 PE=4 SV=2	1025.4	1026.25	2587	2595	CCQHGMVTF	0.745641	9
>tr|Q9BJ58|Q9BJ58_ENTDO Hemocyanin G-type (Fragment) OS=Enteroctopus dofleini OX=267067 PE=4 SV=2	1036.46	1037.08	2227	2235	TDNVTENPF	0.129148	9
>tr|Q9BJ58|Q9BJ58_ENTDO Hemocyanin G-type (Fragment) OS=Enteroctopus dofleini OX=267067 PE=4 SV=2	1041.4	1042.25	2587	2595	CCQHGMVTF	0.745641	9
>tr|Q9BJ58|Q9BJ58_ENTDO Hemocyanin G-type (Fragment) OS=Enteroctopus dofleini OX=267067 PE=4 SV=2	1049.46	1050.18	2159	2167	CPSPEEPKY	0.495716	9
>tr|Q9BJ58|Q9BJ58_ENTDO Hemocyanin G-type (Fragment) OS=Enteroctopus dofleini OX=267067 PE=4 SV=2	1056.6	1057.24	2247	2255	TVRDVKPEL	0.0898857	9
>tr|Q9BJ58|Q9BJ58_ENTDO Hemocyanin G-type (Fragment) OS=Enteroctopus dofleini OX=267067 PE=4 SV=2	1059.58	1060.25	564	572	TKEVKPNPF	0.199075	9
>tr|Q9BJ58|Q9BJ58_ENTDO Hemocyanin G-type (Fragment) OS=Enteroctopus dofleini OX=267067 PE=4 SV=2	1068.48	1069.12	2635	2643	VTEEKDNSF	0.0634666	9
>tr|Q9BJ58|Q9BJ58_ENTDO Hemocyanin G-type (Fragment) OS=Enteroctopus dofleini OX=267067 PE=4 SV=2	1075.6	1076.21	865	873	RSRRDVSSL	0.113563	9
>tr|Q9BJ58|Q9BJ58_ENTDO Hemocyanin G-type (Fragment) OS=Enteroctopus dofleini OX=267067 PE=4 SV=2	1076.57	1077.29	440	449	DMVVVDKTGL	0.178347	10
>tr|Q9BJ58|Q9BJ58_ENTDO Hemocyanin G-type (Fragment) OS=Enteroctopus dofleini OX=267067 PE=4 SV=2	1086.49	1087.2	1306	1314	KDMTTDGRY	0.179876	9
>tr|Q9BJ58|Q9BJ58_ENTDO Hemocyanin G-type (Fragment) OS=Enteroctopus dofleini OX=267067 PE=4 SV=2	1092.56	1093.29	440	449	DMVVVDKTGL	0.178347	10
>tr|Q9BJ58|Q9BJ58_ENTDO Hemocyanin G-type (Fragment) OS=Enteroctopus dofleini OX=267067 PE=4 SV=2	1093.56	1094.29	2319	2327	VHHSMVDRL	0.381176	9
>tr|Q9BJ58|Q9BJ58_ENTDO Hemocyanin G-type (Fragment) OS=Enteroctopus dofleini OX=267067 PE=4 SV=2	1102.48	1103.2	1306	1314	KDMTTDGRY	0.179876	9
>tr|Q9BJ58|Q9BJ58_ENTDO Hemocyanin G-type (Fragment) OS=Enteroctopus dofleini OX=267067 PE=4 SV=2	1109.55	1110.29	2319	2327	VHHSMVDRL	0.381176	9
>tr|Q9BJ58|Q9BJ58_ENTDO Hemocyanin G-type (Fragment) OS=Enteroctopus dofleini OX=267067 PE=4 SV=2	1118.55	1119.19	2652	2661	NTDTTRSPRA	0.0788184	10
>tr|Q9BJ58|Q9BJ58_ENTDO Hemocyanin G-type (Fragment) OS=Enteroctopus dofleini OX=267067 PE=4 SV=2	1134.62	1135.31	850	860	SPGKKESGVVF	0.387796	11
>tr|Q9BJ58|Q9BJ58_ENTDO Hemocyanin G-type (Fragment) OS=Enteroctopus dofleini OX=267067 PE=4 SV=2	1137.51	1138.18	2665	2674	DDPEKGDKSF	0.311113	10
>tr|Q9BJ58|Q9BJ58_ENTDO Hemocyanin G-type (Fragment) OS=Enteroctopus dofleini OX=267067 PE=4 SV=2	1143.52	1144.26	1462	1472	GGRDPHSMSSL	0.597154	11
>tr|Q9BJ58|Q9BJ58_ENTDO Hemocyanin G-type (Fragment) OS=Enteroctopus dofleini OX=267067 PE=4 SV=2	1153.57	1154.28	596	605	EKPTKGHHGY	0.161443	10
>tr|Q9BJ58|Q9BJ58_ENTDO Hemocyanin G-type (Fragment) OS=Enteroctopus dofleini OX=267067 PE=4 SV=2	1156.45	1157.2	53	62	MQDDETPTGY	0.177116	10
>tr|Q9BJ58|Q9BJ58_ENTDO Hemocyanin G-type (Fragment) OS=Enteroctopus dofleini OX=267067 PE=4 SV=2	1159.52	1160.26	1462	1472	GGRDPHSMSSL	0.597154	11
>tr|Q9BJ58|Q9BJ58_ENTDO Hemocyanin G-type (Fragment) OS=Enteroctopus dofleini OX=267067 PE=4 SV=2	1169.6	1170.28	1572	1580	EERKSHDRI	0.0833741	9
>tr|Q9BJ58|Q9BJ58_ENTDO Hemocyanin G-type (Fragment) OS=Enteroctopus dofleini OX=267067 PE=4 SV=2	1172.44	1173.2	53	62	MQDDETPTGY	0.177116	10
>tr|Q9BJ58|Q9BJ58_ENTDO Hemocyanin G-type (Fragment) OS=Enteroctopus dofleini OX=267067 PE=4 SV=2	1186.59	1187.37	105	115	EQTMVGHGSKL	0.156179	11
>tr|Q9BJ58|Q9BJ58_ENTDO Hemocyanin G-type (Fragment) OS=Enteroctopus dofleini OX=267067 PE=4 SV=2	1188.44	1189.21	2027	2037	EGGECHEGSHF	0.366796	11
>tr|Q9BJ58|Q9BJ58_ENTDO Hemocyanin G-type (Fragment) OS=Enteroctopus dofleini OX=267067 PE=4 SV=2	1202.58	1203.37	105	115	EQTMVGHGSKL	0.156179	11
>tr|Q9BJ58|Q9BJ58_ENTDO Hemocyanin G-type (Fragment) OS=Enteroctopus dofleini OX=267067 PE=4 SV=2	1217.48	1218.35	2841	2851	DVCTKDGECTF	0.303314	11
>tr|Q9BJ58|Q9BJ58_ENTDO Hemocyanin G-type (Fragment) OS=Enteroctopus dofleini OX=267067 PE=4 SV=2	1221.56	1222.37	1326	1336	QCPNKDGSKVY	0.35103	11
>tr|Q9BJ58|Q9BJ58_ENTDO Hemocyanin G-type (Fragment) OS=Enteroctopus dofleini OX=267067 PE=4 SV=2	1238.58	1239.4	1326	1336	QCPNKDGSKVY	0.35103	11
>tr|Q9BJ58|Q9BJ58_ENTDO Hemocyanin G-type (Fragment) OS=Enteroctopus dofleini OX=267067 PE=4 SV=2	1256.52	1257.27	976	986	DENGETHPNPF	0.312192	11
>tr|Q9BJ58|Q9BJ58_ENTDO Hemocyanin G-type (Fragment) OS=Enteroctopus dofleini OX=267067 PE=4 SV=2	1299.69	1300.47	2406	2415	HKQQNKDRVF	0.248269	10
>tr|Q9BJ58|Q9BJ58_ENTDO Hemocyanin G-type (Fragment) OS=Enteroctopus dofleini OX=267067 PE=4 SV=2	1309.65	1310.42	995	1006	GEHTTRSPNPTL	0.164025	12
>tr|Q9BJ58|Q9BJ58_ENTDO Hemocyanin G-type (Fragment) OS=Enteroctopus dofleini OX=267067 PE=4 SV=2	1312.69	1313.47	321	330	KERQQHPRSF	0.299487	10
>tr|Q9BJ58|Q9BJ58_ENTDO Hemocyanin G-type (Fragment) OS=Enteroctopus dofleini OX=267067 PE=4 SV=2	1315.61	1316.49	1120	1130	DPMTREHSVPF	0.274601	11
>tr|Q9BJ58|Q9BJ58_ENTDO Hemocyanin G-type (Fragment) OS=Enteroctopus dofleini OX=267067 PE=4 SV=2	1317.56	1318.48	1600	1611	CVPTSKHEENCA	0.191903	12
>tr|Q9BJ58|Q9BJ58_ENTDO Hemocyanin G-type (Fragment) OS=Enteroctopus dofleini OX=267067 PE=4 SV=2	1331.6	1332.49	1120	1130	DPMTREHSVPF	0.274601	11
>tr|Q9BJ58|Q9BJ58_ENTDO Hemocyanin G-type (Fragment) OS=Enteroctopus dofleini OX=267067 PE=4 SV=2	1331.61	1332.45	2189	2200	EDSMRRHGSSVA	0.133332	12
>tr|Q9BJ58|Q9BJ58_ENTDO Hemocyanin G-type (Fragment) OS=Enteroctopus dofleini OX=267067 PE=4 SV=2	1347.61	1348.45	2189	2200	EDSMRRHGSSVA	0.133332	12
>tr|Q9BJ58|Q9BJ58_ENTDO Hemocyanin G-type (Fragment) OS=Enteroctopus dofleini OX=267067 PE=4 SV=2	1365.69	1366.49	1997	2006	RHQRDHDRVF	0.282993	10
>tr|Q9BJ58|Q9BJ58_ENTDO Hemocyanin G-type (Fragment) OS=Enteroctopus dofleini OX=267067 PE=4 SV=2	1367.78	1368.59	2520	2531	KREVHKKTVGDA	0.0811223	12
>tr|Q9BJ58|Q9BJ58_ENTDO Hemocyanin G-type (Fragment) OS=Enteroctopus dofleini OX=267067 PE=4 SV=2	1419.65	1420.49	2136	2147	TRVKEDESDHGF	0.0883628	12
>tr|Q9BJ58|Q9BJ58_ENTDO Hemocyanin G-type (Fragment) OS=Enteroctopus dofleini OX=267067 PE=4 SV=2	1431.63	1432.45	1413	1424	NSETNRDPQEEL	0.0671973	12
>tr|Q9BJ58|Q9BJ58_ENTDO Hemocyanin G-type (Fragment) OS=Enteroctopus dofleini OX=267067 PE=4 SV=2	1482.72	1483.66	1719	1730	RRMQRDKSSDGF	0.178885	12
>tr|Q9BJ58|Q9BJ58_ENTDO Hemocyanin G-type (Fragment) OS=Enteroctopus dofleini OX=267067 PE=4 SV=2	1498.72	1499.66	1719	1730	RRMQRDKSSDGF	0.178885	12
>tr|Q9BJ58|Q9BJ58_ENTDO Hemocyanin G-type (Fragment) OS=Enteroctopus dofleini OX=267067 PE=4 SV=2	1572.7	1573.62	1829	1841	SEDTETKREVSEY	0.0372266	13
>tr|Q9BJ58|Q9BJ58_ENTDO Hemocyanin G-type (Fragment) OS=Enteroctopus dofleini OX=267067 PE=4 SV=2	1871.89	1873.01	705	720	NNNKHTHSHSVPTHVY	0.0673253	16
>tr|Q9BJ58|Q9BJ58_ENTDO Hemocyanin G-type (Fragment) OS=Enteroctopus dofleini OX=267067 PE=4 SV=2	2042.87	2044.14	351	368	PSEDKRHSDNCNNHVGSF	0.437308	18
>tr|Q5XLV2|Q5XLV2_ENTDO Hemocyanin A-type (Fragment) OS=Enteroctopus dofleini OX=267067 GN=HA PE=4 SV=1	802.395	802.873	2308	2313	QEHRHL	0.222317	6
>tr|Q5XLV2|Q5XLV2_ENTDO Hemocyanin A-type (Fragment) OS=Enteroctopus dofleini OX=267067 GN=HA PE=4 SV=1	806.314	806.877	2832	2838	GGEHEMF	0.570008	7
>tr|Q5XLV2|Q5XLV2_ENTDO Hemocyanin A-type (Fragment) OS=Enteroctopus dofleini OX=267067 GN=HA PE=4 SV=1	819.422	819.904	2308	2313	QEHRHL	0.222317	6
>tr|Q5XLV2|Q5XLV2_ENTDO Hemocyanin A-type (Fragment) OS=Enteroctopus dofleini OX=267067 GN=HA PE=4 SV=1	819.436	819.941	396	402	PRPTVSY	0.189805	7
>tr|Q5XLV2|Q5XLV2_ENTDO Hemocyanin A-type (Fragment) OS=Enteroctopus dofleini OX=267067 GN=HA PE=4 SV=1	822.309	822.877	2832	2838	GGEHEMF	0.570008	7
>tr|Q5XLV2|Q5XLV2_ENTDO Hemocyanin A-type (Fragment) OS=Enteroctopus dofleini OX=267067 GN=HA PE=4 SV=1	822.366	822.918	2576	2582	TKQMEDA	0.0541362	7
>tr|Q5XLV2|Q5XLV2_ENTDO Hemocyanin A-type (Fragment) OS=Enteroctopus dofleini OX=267067 GN=HA PE=4 SV=1	830.484	830.968	2507	2513	RKNVNSL	0.0883515	7
>tr|Q5XLV2|Q5XLV2_ENTDO Hemocyanin A-type (Fragment) OS=Enteroctopus dofleini OX=267067 GN=HA PE=4 SV=1	835.398	835.96	1196	1202	TQQMKEA	0.0603143	7
>tr|Q5XLV2|Q5XLV2_ENTDO Hemocyanin A-type (Fragment) OS=Enteroctopus dofleini OX=267067 GN=HA PE=4 SV=1	837.458	837.96	661	667	SEVHRPL	0.307476	7
>tr|Q5XLV2|Q5XLV2_ENTDO Hemocyanin A-type (Fragment) OS=Enteroctopus dofleini OX=267067 GN=HA PE=4 SV=1	838.361	838.917	2576	2582	TKQMEDA	0.0541362	7
>tr|Q5XLV2|Q5XLV2_ENTDO Hemocyanin A-type (Fragment) OS=Enteroctopus dofleini OX=267067 GN=HA PE=4 SV=1	846.457	846.962	2467	2474	ESVDGKVL	0.143689	8
>tr|Q5XLV2|Q5XLV2_ENTDO Hemocyanin A-type (Fragment) OS=Enteroctopus dofleini OX=267067 GN=HA PE=4 SV=1	847.406	847.911	967	973	GEHTTRF	0.347296	7
>tr|Q5XLV2|Q5XLV2_ENTDO Hemocyanin A-type (Fragment) OS=Enteroctopus dofleini OX=267067 GN=HA PE=4 SV=1	848.429	849.002	708	715	GGMSVREL	0.331735	8
>tr|Q5XLV2|Q5XLV2_ENTDO Hemocyanin A-type (Fragment) OS=Enteroctopus dofleini OX=267067 GN=HA PE=4 SV=1	851.393	851.959	1196	1202	TQQMKEA	0.0603143	7
>tr|Q5XLV2|Q5XLV2_ENTDO Hemocyanin A-type (Fragment) OS=Enteroctopus dofleini OX=267067 GN=HA PE=4 SV=1	853.376	853.975	1935	1941	SKPEDMF	0.704257	7
>tr|Q5XLV2|Q5XLV2_ENTDO Hemocyanin A-type (Fragment) OS=Enteroctopus dofleini OX=267067 GN=HA PE=4 SV=1	856.416	856.916	1858	1865	GGKEEHSL	0.100101	8
>tr|Q5XLV2|Q5XLV2_ENTDO Hemocyanin A-type (Fragment) OS=Enteroctopus dofleini OX=267067 GN=HA PE=4 SV=1	859.474	859.966	560	566	RNVDSRL	0.198041	7
>tr|Q5XLV2|Q5XLV2_ENTDO Hemocyanin A-type (Fragment) OS=Enteroctopus dofleini OX=267067 GN=HA PE=4 SV=1	860.445	861.06	1489	1495	NVPMRPF	0.853557	7
>tr|Q5XLV2|Q5XLV2_ENTDO Hemocyanin A-type (Fragment) OS=Enteroctopus dofleini OX=267067 GN=HA PE=4 SV=1	862.46	863.076	1077	1083	RKPMSPF	0.808003	7
>tr|Q5XLV2|Q5XLV2_ENTDO Hemocyanin A-type (Fragment) OS=Enteroctopus dofleini OX=267067 GN=HA PE=4 SV=1	864.356	864.958	2014	2021	GGSTEMPW	0.676037	8
>tr|Q5XLV2|Q5XLV2_ENTDO Hemocyanin A-type (Fragment) OS=Enteroctopus dofleini OX=267067 GN=HA PE=4 SV=1	864.424	865.002	708	715	GGMSVREL	0.331735	8
>tr|Q5XLV2|Q5XLV2_ENTDO Hemocyanin A-type (Fragment) OS=Enteroctopus dofleini OX=267067 GN=HA PE=4 SV=1	869.371	869.974	1935	1941	SKPEDMF	0.704257	7
>tr|Q5XLV2|Q5XLV2_ENTDO Hemocyanin A-type (Fragment) OS=Enteroctopus dofleini OX=267067 GN=HA PE=4 SV=1	873.49	873.993	2090	2096	RRNVESL	0.0766867	7
>tr|Q5XLV2|Q5XLV2_ENTDO Hemocyanin A-type (Fragment) OS=Enteroctopus dofleini OX=267067 GN=HA PE=4 SV=1	874.499	875.019	1626	1633	RVVTEVTA	0.0247509	8
>tr|Q5XLV2|Q5XLV2_ENTDO Hemocyanin A-type (Fragment) OS=Enteroctopus dofleini OX=267067 GN=HA PE=4 SV=1	876.44	877.059	1489	1495	NVPMRPF	0.853557	7
>tr|Q5XLV2|Q5XLV2_ENTDO Hemocyanin A-type (Fragment) OS=Enteroctopus dofleini OX=267067 GN=HA PE=4 SV=1	878.455	879.075	1077	1083	RKPMSPF	0.808003	7
>tr|Q5XLV2|Q5XLV2_ENTDO Hemocyanin A-type (Fragment) OS=Enteroctopus dofleini OX=267067 GN=HA PE=4 SV=1	880.351	880.957	2014	2021	GGSTEMPW	0.676037	8
>tr|Q5XLV2|Q5XLV2_ENTDO Hemocyanin A-type (Fragment) OS=Enteroctopus dofleini OX=267067 GN=HA PE=4 SV=1	881.356	881.939	1266	1273	TEGDMESL	0.0966949	8
>tr|Q5XLV2|Q5XLV2_ENTDO Hemocyanin A-type (Fragment) OS=Enteroctopus dofleini OX=267067 GN=HA PE=4 SV=1	885.429	886.067	240	246	HKPMEPF	0.734071	7
>tr|Q5XLV2|Q5XLV2_ENTDO Hemocyanin A-type (Fragment) OS=Enteroctopus dofleini OX=267067 GN=HA PE=4 SV=1	886.42	887.011	1501	1507	NHDRMTL	0.363662	7
>tr|Q5XLV2|Q5XLV2_ENTDO Hemocyanin A-type (Fragment) OS=Enteroctopus dofleini OX=267067 GN=HA PE=4 SV=1	891.403	892.027	1593	1600	GGKSEMPW	0.634589	8
>tr|Q5XLV2|Q5XLV2_ENTDO Hemocyanin A-type (Fragment) OS=Enteroctopus dofleini OX=267067 GN=HA PE=4 SV=1	897.351	897.939	1266	1273	TEGDMESL	0.0966949	8
>tr|Q5XLV2|Q5XLV2_ENTDO Hemocyanin A-type (Fragment) OS=Enteroctopus dofleini OX=267067 GN=HA PE=4 SV=1	901.424	902.066	240	246	HKPMEPF	0.734071	7
>tr|Q5XLV2|Q5XLV2_ENTDO Hemocyanin A-type (Fragment) OS=Enteroctopus dofleini OX=267067 GN=HA PE=4 SV=1	902.415	903.01	1501	1507	NHDRMTL	0.363662	7
>tr|Q5XLV2|Q5XLV2_ENTDO Hemocyanin A-type (Fragment) OS=Enteroctopus dofleini OX=267067 GN=HA PE=4 SV=1	905.346	905.967	2422	2429	GGDNEMPW	0.778264	8
>tr|Q5XLV2|Q5XLV2_ENTDO Hemocyanin A-type (Fragment) OS=Enteroctopus dofleini OX=267067 GN=HA PE=4 SV=1	907.398	908.027	1593	1600	GGKSEMPW	0.634589	8
>tr|Q5XLV2|Q5XLV2_ENTDO Hemocyanin A-type (Fragment) OS=Enteroctopus dofleini OX=267067 GN=HA PE=4 SV=1	909.454	909.983	1652	1659	VPRQDHSA	0.131074	8
>tr|Q5XLV2|Q5XLV2_ENTDO Hemocyanin A-type (Fragment) OS=Enteroctopus dofleini OX=267067 GN=HA PE=4 SV=1	913.416	913.971	2791	2797	QHEDRVF	0.372931	7
>tr|Q5XLV2|Q5XLV2_ENTDO Hemocyanin A-type (Fragment) OS=Enteroctopus dofleini OX=267067 GN=HA PE=4 SV=1	916.398	917.037	344	351	GGVHEMTW	0.479901	8
>tr|Q5XLV2|Q5XLV2_ENTDO Hemocyanin A-type (Fragment) OS=Enteroctopus dofleini OX=267067 GN=HA PE=4 SV=1	921.341	921.966	2422	2429	GGDNEMPW	0.778264	8
>tr|Q5XLV2|Q5XLV2_ENTDO Hemocyanin A-type (Fragment) OS=Enteroctopus dofleini OX=267067 GN=HA PE=4 SV=1	923.393	924.026	763	770	GGSKEMEW	0.438552	8
>tr|Q5XLV2|Q5XLV2_ENTDO Hemocyanin A-type (Fragment) OS=Enteroctopus dofleini OX=267067 GN=HA PE=4 SV=1	930.443	931.002	2791	2797	QHEDRVF	0.372931	7
>tr|Q5XLV2|Q5XLV2_ENTDO Hemocyanin A-type (Fragment) OS=Enteroctopus dofleini OX=267067 GN=HA PE=4 SV=1	932.393	933.037	344	351	GGVHEMTW	0.479901	8
>tr|Q5XLV2|Q5XLV2_ENTDO Hemocyanin A-type (Fragment) OS=Enteroctopus dofleini OX=267067 GN=HA PE=4 SV=1	939.388	940.025	763	770	GGSKEMEW	0.438552	8
>tr|Q5XLV2|Q5XLV2_ENTDO Hemocyanin A-type (Fragment) OS=Enteroctopus dofleini OX=267067 GN=HA PE=4 SV=1	955.4	955.959	1662	1669	KSEEGNEY	0.0637241	8
>tr|Q5XLV2|Q5XLV2_ENTDO Hemocyanin A-type (Fragment) OS=Enteroctopus dofleini OX=267067 GN=HA PE=4 SV=1	977.491	978.062	1044	1051	HHSNVDRI	0.211871	8
>tr|Q5XLV2|Q5XLV2_ENTDO Hemocyanin A-type (Fragment) OS=Enteroctopus dofleini OX=267067 GN=HA PE=4 SV=1	977.491	978.062	1880	1887	HHSNVDRL	0.329543	8
>tr|Q5XLV2|Q5XLV2_ENTDO Hemocyanin A-type (Fragment) OS=Enteroctopus dofleini OX=267067 GN=HA PE=4 SV=1	979.47	980.034	2702	2709	HHSNTDRI	0.233481	8
>tr|Q5XLV2|Q5XLV2_ENTDO Hemocyanin A-type (Fragment) OS=Enteroctopus dofleini OX=267067 GN=HA PE=4 SV=1	984.374	985.198	478	486	CCVHGMSTF	0.712209	9
>tr|Q5XLV2|Q5XLV2_ENTDO Hemocyanin A-type (Fragment) OS=Enteroctopus dofleini OX=267067 GN=HA PE=4 SV=1	991.507	992.089	632	639	HHSQVDRL	0.282885	8
>tr|Q5XLV2|Q5XLV2_ENTDO Hemocyanin A-type (Fragment) OS=Enteroctopus dofleini OX=267067 GN=HA PE=4 SV=1	991.507	992.089	208	215	HHSNVERL	0.275042	8
>tr|Q5XLV2|Q5XLV2_ENTDO Hemocyanin A-type (Fragment) OS=Enteroctopus dofleini OX=267067 GN=HA PE=4 SV=1	993.438	994.181	50	59	PDGSTVVCCL	0.659001	10
>tr|Q5XLV2|Q5XLV2_ENTDO Hemocyanin A-type (Fragment) OS=Enteroctopus dofleini OX=267067 GN=HA PE=4 SV=1	1000.37	1001.2	478	486	CCVHGMSTF	0.712209	9
>tr|Q5XLV2|Q5XLV2_ENTDO Hemocyanin A-type (Fragment) OS=Enteroctopus dofleini OX=267067 GN=HA PE=4 SV=1	1013.36	1014.08	2407	2415	CKDETCEDA	0.108759	9
>tr|Q5XLV2|Q5XLV2_ENTDO Hemocyanin A-type (Fragment) OS=Enteroctopus dofleini OX=267067 GN=HA PE=4 SV=1	1013.62	1014.22	1671	1678	VRKNVERL	0.125128	8
>tr|Q5XLV2|Q5XLV2_ENTDO Hemocyanin A-type (Fragment) OS=Enteroctopus dofleini OX=267067 GN=HA PE=4 SV=1	1016.56	1017.18	1471	1478	QRSRKVPY	0.188807	8
>tr|Q5XLV2|Q5XLV2_ENTDO Hemocyanin A-type (Fragment) OS=Enteroctopus dofleini OX=267067 GN=HA PE=4 SV=1	1025.4	1026.25	2560	2568	CCQHGMVTF	0.745641	9
>tr|Q5XLV2|Q5XLV2_ENTDO Hemocyanin A-type (Fragment) OS=Enteroctopus dofleini OX=267067 GN=HA PE=4 SV=1	1033.59	1034.21	1471	1478	QRSRKVPY	0.188807	8
>tr|Q5XLV2|Q5XLV2_ENTDO Hemocyanin A-type (Fragment) OS=Enteroctopus dofleini OX=267067 GN=HA PE=4 SV=1	1036.46	1037.08	2200	2208	TDNVTENPF	0.129148	9
>tr|Q5XLV2|Q5XLV2_ENTDO Hemocyanin A-type (Fragment) OS=Enteroctopus dofleini OX=267067 GN=HA PE=4 SV=1	1041.4	1042.25	2560	2568	CCQHGMVTF	0.745641	9
>tr|Q5XLV2|Q5XLV2_ENTDO Hemocyanin A-type (Fragment) OS=Enteroctopus dofleini OX=267067 GN=HA PE=4 SV=1	1049.46	1050.18	2132	2140	CPSPEEPKY	0.495716	9
>tr|Q5XLV2|Q5XLV2_ENTDO Hemocyanin A-type (Fragment) OS=Enteroctopus dofleini OX=267067 GN=HA PE=4 SV=1	1056.6	1057.24	2220	2228	TVRDVKPEL	0.0898857	9
>tr|Q5XLV2|Q5XLV2_ENTDO Hemocyanin A-type (Fragment) OS=Enteroctopus dofleini OX=267067 GN=HA PE=4 SV=1	1059.58	1060.25	536	544	TKEVKPNPF	0.199075	9
>tr|Q5XLV2|Q5XLV2_ENTDO Hemocyanin A-type (Fragment) OS=Enteroctopus dofleini OX=267067 GN=HA PE=4 SV=1	1068.48	1069.12	2608	2616	VTEEKDNSF	0.0634666	9
>tr|Q5XLV2|Q5XLV2_ENTDO Hemocyanin A-type (Fragment) OS=Enteroctopus dofleini OX=267067 GN=HA PE=4 SV=1	1075.6	1076.21	837	845	RSRRDVSSL	0.113563	9
>tr|Q5XLV2|Q5XLV2_ENTDO Hemocyanin A-type (Fragment) OS=Enteroctopus dofleini OX=267067 GN=HA PE=4 SV=1	1086.49	1087.2	1278	1286	KDMTTDGRY	0.179876	9
>tr|Q5XLV2|Q5XLV2_ENTDO Hemocyanin A-type (Fragment) OS=Enteroctopus dofleini OX=267067 GN=HA PE=4 SV=1	1093.56	1094.29	2292	2300	VHHSMVDRL	0.381176	9
>tr|Q5XLV2|Q5XLV2_ENTDO Hemocyanin A-type (Fragment) OS=Enteroctopus dofleini OX=267067 GN=HA PE=4 SV=1	1102.48	1103.2	1278	1286	KDMTTDGRY	0.179876	9
>tr|Q5XLV2|Q5XLV2_ENTDO Hemocyanin A-type (Fragment) OS=Enteroctopus dofleini OX=267067 GN=HA PE=4 SV=1	1109.55	1110.29	2292	2300	VHHSMVDRL	0.381176	9
>tr|Q5XLV2|Q5XLV2_ENTDO Hemocyanin A-type (Fragment) OS=Enteroctopus dofleini OX=267067 GN=HA PE=4 SV=1	1118.55	1119.19	2625	2634	NTDTTRSPRA	0.0788184	10
>tr|Q5XLV2|Q5XLV2_ENTDO Hemocyanin A-type (Fragment) OS=Enteroctopus dofleini OX=267067 GN=HA PE=4 SV=1	1137.51	1138.18	2638	2647	DDPEKGDKSF	0.311113	10
>tr|Q5XLV2|Q5XLV2_ENTDO Hemocyanin A-type (Fragment) OS=Enteroctopus dofleini OX=267067 GN=HA PE=4 SV=1	1143.52	1144.26	1434	1444	GGRDPHSMSSL	0.597154	11
>tr|Q5XLV2|Q5XLV2_ENTDO Hemocyanin A-type (Fragment) OS=Enteroctopus dofleini OX=267067 GN=HA PE=4 SV=1	1153.57	1154.28	568	577	EKPTKGHHGY	0.161443	10
>tr|Q5XLV2|Q5XLV2_ENTDO Hemocyanin A-type (Fragment) OS=Enteroctopus dofleini OX=267067 GN=HA PE=4 SV=1	1159.52	1160.26	1434	1444	GGRDPHSMSSL	0.597154	11
>tr|Q5XLV2|Q5XLV2_ENTDO Hemocyanin A-type (Fragment) OS=Enteroctopus dofleini OX=267067 GN=HA PE=4 SV=1	1169.6	1170.28	1544	1552	EERKSHDRI	0.0833741	9
>tr|Q5XLV2|Q5XLV2_ENTDO Hemocyanin A-type (Fragment) OS=Enteroctopus dofleini OX=267067 GN=HA PE=4 SV=1	1186.59	1187.37	77	87	EQTMVGHGSKL	0.156179	11
>tr|Q5XLV2|Q5XLV2_ENTDO Hemocyanin A-type (Fragment) OS=Enteroctopus dofleini OX=267067 GN=HA PE=4 SV=1	1188.44	1189.21	2000	2010	EGGECHEGSHF	0.366796	11
>tr|Q5XLV2|Q5XLV2_ENTDO Hemocyanin A-type (Fragment) OS=Enteroctopus dofleini OX=267067 GN=HA PE=4 SV=1	1192.62	1193.35	822	832	SPGKKESDVVF	0.292137	11
>tr|Q5XLV2|Q5XLV2_ENTDO Hemocyanin A-type (Fragment) OS=Enteroctopus dofleini OX=267067 GN=HA PE=4 SV=1	1202.58	1203.37	77	87	EQTMVGHGSKL	0.156179	11
>tr|Q5XLV2|Q5XLV2_ENTDO Hemocyanin A-type (Fragment) OS=Enteroctopus dofleini OX=267067 GN=HA PE=4 SV=1	1217.48	1218.35	2814	2824	DVCTKDGECTF	0.303314	11
>tr|Q5XLV2|Q5XLV2_ENTDO Hemocyanin A-type (Fragment) OS=Enteroctopus dofleini OX=267067 GN=HA PE=4 SV=1	1221.56	1222.37	1298	1308	QCPNKDGSKVY	0.35103	11
>tr|Q5XLV2|Q5XLV2_ENTDO Hemocyanin A-type (Fragment) OS=Enteroctopus dofleini OX=267067 GN=HA PE=4 SV=1	1238.58	1239.4	1298	1308	QCPNKDGSKVY	0.35103	11
>tr|Q5XLV2|Q5XLV2_ENTDO Hemocyanin A-type (Fragment) OS=Enteroctopus dofleini OX=267067 GN=HA PE=4 SV=1	1256.52	1257.27	948	958	DENGETHPNPF	0.312192	11
>tr|Q5XLV2|Q5XLV2_ENTDO Hemocyanin A-type (Fragment) OS=Enteroctopus dofleini OX=267067 GN=HA PE=4 SV=1	1272.68	1273.45	2379	2388	HKTQNKDRVF	0.151595	10
>tr|Q5XLV2|Q5XLV2_ENTDO Hemocyanin A-type (Fragment) OS=Enteroctopus dofleini OX=267067 GN=HA PE=4 SV=1	1312.69	1313.47	293	302	KERQQHPRSF	0.299487	10
>tr|Q5XLV2|Q5XLV2_ENTDO Hemocyanin A-type (Fragment) OS=Enteroctopus dofleini OX=267067 GN=HA PE=4 SV=1	1331.61	1332.45	2162	2173	EDSMRRHGSSVA	0.133332	12
>tr|Q5XLV2|Q5XLV2_ENTDO Hemocyanin A-type (Fragment) OS=Enteroctopus dofleini OX=267067 GN=HA PE=4 SV=1	1337.68	1338.48	1970	1979	RHQKDHDRVF	0.281992	10
>tr|Q5XLV2|Q5XLV2_ENTDO Hemocyanin A-type (Fragment) OS=Enteroctopus dofleini OX=267067 GN=HA PE=4 SV=1	1347.61	1348.45	2162	2173	EDSMRRHGSSVA	0.133332	12
>tr|Q5XLV2|Q5XLV2_ENTDO Hemocyanin A-type (Fragment) OS=Enteroctopus dofleini OX=267067 GN=HA PE=4 SV=1	1418.7	1419.55	2109	2120	TRVKKDESDHGF	0.103461	12
>tr|Q5XLV2|Q5XLV2_ENTDO Hemocyanin A-type (Fragment) OS=Enteroctopus dofleini OX=267067 GN=HA PE=4 SV=1	1430.69	1431.51	1385	1396	NSETNRDPQEKL	0.091689	12
>tr|Q5XLV2|Q5XLV2_ENTDO Hemocyanin A-type (Fragment) OS=Enteroctopus dofleini OX=267067 GN=HA PE=4 SV=1	1454.72	1455.65	1691	1702	RRMQKDKSSDGF	0.200892	12
>tr|Q5XLV2|Q5XLV2_ENTDO Hemocyanin A-type (Fragment) OS=Enteroctopus dofleini OX=267067 GN=HA PE=4 SV=1	1470.71	1471.64	1691	1702	RRMQKDKSSDGF	0.200892	12
>tr|Q5XLV2|Q5XLV2_ENTDO Hemocyanin A-type (Fragment) OS=Enteroctopus dofleini OX=267067 GN=HA PE=4 SV=1	1528.72	1529.72	1090	1102	NVDPMTREHSVPF	0.237107	13
>tr|Q5XLV2|Q5XLV2_ENTDO Hemocyanin A-type (Fragment) OS=Enteroctopus dofleini OX=267067 GN=HA PE=4 SV=1	1544.72	1545.72	1090	1102	NVDPMTREHSVPF	0.237107	13
>tr|Q5XLV2|Q5XLV2_ENTDO Hemocyanin A-type (Fragment) OS=Enteroctopus dofleini OX=267067 GN=HA PE=4 SV=1	1572.7	1573.62	1801	1813	SEDTETKREVSEY	0.0372266	13
>tr|Q5XLV2|Q5XLV2_ENTDO Hemocyanin A-type (Fragment) OS=Enteroctopus dofleini OX=267067 GN=HA PE=4 SV=1	1871.89	1873.01	677	692	NNNKHTHSHSVPTHVY	0.0673253	16
>tr|Q5XLV2|Q5XLV2_ENTDO Hemocyanin A-type (Fragment) OS=Enteroctopus dofleini OX=267067 GN=HA PE=4 SV=1	2042.87	2044.14	323	340	PSEDKRHSDNCNNHVGSF	0.437308	18
>Cluster-58773.163438;orf1 len=994 frame:2 start:254 end:3235 gi|410935705|gb|AFV94409.1| thioester-containing protein 1 [Euprymna scolopes]	814.347	815.004	693	699	PVMSSMY	0.389131	7
>Cluster-58773.163438;orf1 len=994 frame:2 start:254 end:3235 gi|410935705|gb|AFV94409.1| thioester-containing protein 1 [Euprymna scolopes]	830.342	831.003	693	699	PVMSSMY	0.389131	7
>Cluster-58773.163438;orf1 len=994 frame:2 start:254 end:3235 gi|410935705|gb|AFV94409.1| thioester-containing protein 1 [Euprymna scolopes]	841.468	841.994	18	24	VHVPSRF	0.485712	7
>Cluster-58773.163438;orf1 len=994 frame:2 start:254 end:3235 gi|410935705|gb|AFV94409.1| thioester-containing protein 1 [Euprymna scolopes]	846.337	847.003	693	699	PVMSSMY	0.389131	7
>Cluster-58773.163438;orf1 len=994 frame:2 start:254 end:3235 gi|410935705|gb|AFV94409.1| thioester-containing protein 1 [Euprymna scolopes]	847.416	847.905	833	839	KSNEQEL	0.0954521	7
>Cluster-58773.163438;orf1 len=994 frame:2 start:254 end:3235 gi|410935705|gb|AFV94409.1| thioester-containing protein 1 [Euprymna scolopes]	864.432	864.942	685	690	EERRQF	0.19294	6
>Cluster-58773.163438;orf1 len=994 frame:2 start:254 end:3235 gi|410935705|gb|AFV94409.1| thioester-containing protein 1 [Euprymna scolopes]	865.489	866.014	847	854	KQVGSHPL	0.241255	8
>Cluster-58773.163438;orf1 len=994 frame:2 start:254 end:3235 gi|410935705|gb|AFV94409.1| thioester-containing protein 1 [Euprymna scolopes]	870.395	870.899	732	739	DESGNVHI	0.106676	8
>Cluster-58773.163438;orf1 len=994 frame:2 start:254 end:3235 gi|410935705|gb|AFV94409.1| thioester-containing protein 1 [Euprymna scolopes]	878.484	879.013	68	75	VHGKPNNI	0.173819	8
>Cluster-58773.163438;orf1 len=994 frame:2 start:254 end:3235 gi|410935705|gb|AFV94409.1| thioester-containing protein 1 [Euprymna scolopes]	891.508	892.115	526	532	MKDRKTL	0.17058	7
>Cluster-58773.163438;orf1 len=994 frame:2 start:254 end:3235 gi|410935705|gb|AFV94409.1| thioester-containing protein 1 [Euprymna scolopes]	901.474	902.001	511	518	EVNSSRPI	0.122988	8
>Cluster-58773.163438;orf1 len=994 frame:2 start:254 end:3235 gi|410935705|gb|AFV94409.1| thioester-containing protein 1 [Euprymna scolopes]	903.366	903.995	820	826	NPEEMHF	0.522476	7
>Cluster-58773.163438;orf1 len=994 frame:2 start:254 end:3235 gi|410935705|gb|AFV94409.1| thioester-containing protein 1 [Euprymna scolopes]	907.503	908.114	526	532	MKDRKTL	0.17058	7
>Cluster-58773.163438;orf1 len=994 frame:2 start:254 end:3235 gi|410935705|gb|AFV94409.1| thioester-containing protein 1 [Euprymna scolopes]	910.499	911.052	503	510	KVGEEVHI	0.0447971	8
>Cluster-58773.163438;orf1 len=994 frame:2 start:254 end:3235 gi|410935705|gb|AFV94409.1| thioester-containing protein 1 [Euprymna scolopes]	919.361	919.994	820	826	NPEEMHF	0.522476	7
>Cluster-58773.163438;orf1 len=994 frame:2 start:254 end:3235 gi|410935705|gb|AFV94409.1| thioester-containing protein 1 [Euprymna scolopes]	936.452	936.997	81	88	KTTEEESI	0.0215334	8
>Cluster-58773.163438;orf1 len=994 frame:2 start:254 end:3235 gi|410935705|gb|AFV94409.1| thioester-containing protein 1 [Euprymna scolopes]	948.523	949.236	29	35	RNMKMRL	0.614225	7
>Cluster-58773.163438;orf1 len=994 frame:2 start:254 end:3235 gi|410935705|gb|AFV94409.1| thioester-containing protein 1 [Euprymna scolopes]	955.4	955.959	430	437	SDNDTKEF	0.372228	8
>Cluster-58773.163438;orf1 len=994 frame:2 start:254 end:3235 gi|410935705|gb|AFV94409.1| thioester-containing protein 1 [Euprymna scolopes]	964.518	965.235	29	35	RNMKMRL	0.614225	7
>Cluster-58773.163438;orf1 len=994 frame:2 start:254 end:3235 gi|410935705|gb|AFV94409.1| thioester-containing protein 1 [Euprymna scolopes]	977.513	978.206	764	771	PMKKPTEF	0.375955	8
>Cluster-58773.163438;orf1 len=994 frame:2 start:254 end:3235 gi|410935705|gb|AFV94409.1| thioester-containing protein 1 [Euprymna scolopes]	980.513	981.235	29	35	RNMKMRL	0.614225	7
>Cluster-58773.163438;orf1 len=994 frame:2 start:254 end:3235 gi|410935705|gb|AFV94409.1| thioester-containing protein 1 [Euprymna scolopes]	982.604	983.206	440	448	PVDGKVRVL	0.267558	9
>Cluster-58773.163438;orf1 len=994 frame:2 start:254 end:3235 gi|410935705|gb|AFV94409.1| thioester-containing protein 1 [Euprymna scolopes]	992.468	993.067	227	235	SDKPTTGTW	0.442564	9
>Cluster-58773.163438;orf1 len=994 frame:2 start:254 end:3235 gi|410935705|gb|AFV94409.1| thioester-containing protein 1 [Euprymna scolopes]	993.507	994.205	764	771	PMKKPTEF	0.375955	8
>Cluster-58773.163438;orf1 len=994 frame:2 start:254 end:3235 gi|410935705|gb|AFV94409.1| thioester-containing protein 1 [Euprymna scolopes]	1020.57	1021.21	873	881	VKPEGVTKY	0.0913981	9
>Cluster-58773.163438;orf1 len=994 frame:2 start:254 end:3235 gi|410935705|gb|AFV94409.1| thioester-containing protein 1 [Euprymna scolopes]	1031.52	1032.21	189	197	TTVQQPMNI	0.0846016	9
>Cluster-58773.163438;orf1 len=994 frame:2 start:254 end:3235 gi|410935705|gb|AFV94409.1| thioester-containing protein 1 [Euprymna scolopes]	1047.51	1048.21	189	197	TTVQQPMNI	0.0846016	9
>Cluster-58773.163438;orf1 len=994 frame:2 start:254 end:3235 gi|410935705|gb|AFV94409.1| thioester-containing protein 1 [Euprymna scolopes]	1078.49	1079.29	887	896	MMNVTGSEPL	0.132871	10
>Cluster-58773.163438;orf1 len=994 frame:2 start:254 end:3235 gi|410935705|gb|AFV94409.1| thioester-containing protein 1 [Euprymna scolopes]	1089.48	1090.14	537	545	VEVNDETHF	0.122835	9
>Cluster-58773.163438;orf1 len=994 frame:2 start:254 end:3235 gi|410935705|gb|AFV94409.1| thioester-containing protein 1 [Euprymna scolopes]	1094.49	1095.29	887	896	MMNVTGSEPL	0.132871	10
>Cluster-58773.163438;orf1 len=994 frame:2 start:254 end:3235 gi|410935705|gb|AFV94409.1| thioester-containing protein 1 [Euprymna scolopes]	1109.5	1110.3	368	377	TQKSMMSPEA	0.110885	10
>Cluster-58773.163438;orf1 len=994 frame:2 start:254 end:3235 gi|410935705|gb|AFV94409.1| thioester-containing protein 1 [Euprymna scolopes]	1110.48	1111.29	887	896	MMNVTGSEPL	0.132871	10
>Cluster-58773.163438;orf1 len=994 frame:2 start:254 end:3235 gi|410935705|gb|AFV94409.1| thioester-containing protein 1 [Euprymna scolopes]	1112.52	1113.24	417	425	TENDRMHPL	0.207191	9
>Cluster-58773.163438;orf1 len=994 frame:2 start:254 end:3235 gi|410935705|gb|AFV94409.1| thioester-containing protein 1 [Euprymna scolopes]	1117.57	1118.3	644	655	GGMPGSVTKVNA	0.240747	12
>Cluster-58773.163438;orf1 len=994 frame:2 start:254 end:3235 gi|410935705|gb|AFV94409.1| thioester-containing protein 1 [Euprymna scolopes]	1125.49	1126.3	368	377	TQKSMMSPEA	0.110885	10
>Cluster-58773.163438;orf1 len=994 frame:2 start:254 end:3235 gi|410935705|gb|AFV94409.1| thioester-containing protein 1 [Euprymna scolopes]	1128.51	1129.24	417	425	TENDRMHPL	0.207191	9
>Cluster-58773.163438;orf1 len=994 frame:2 start:254 end:3235 gi|410935705|gb|AFV94409.1| thioester-containing protein 1 [Euprymna scolopes]	1133.56	1134.3	644	655	GGMPGSVTKVNA	0.240747	12
>Cluster-58773.163438;orf1 len=994 frame:2 start:254 end:3235 gi|410935705|gb|AFV94409.1| thioester-containing protein 1 [Euprymna scolopes]	1141.49	1142.3	368	377	TQKSMMSPEA	0.110885	10
>Cluster-58773.163438;orf1 len=994 frame:2 start:254 end:3235 gi|410935705|gb|AFV94409.1| thioester-containing protein 1 [Euprymna scolopes]	1142.6	1143.26	387	396	RVSHSSSRNL	0.139742	10
>Cluster-58773.163438;orf1 len=994 frame:2 start:254 end:3235 gi|410935705|gb|AFV94409.1| thioester-containing protein 1 [Euprymna scolopes]	1146.6	1147.28	804	813	KTDQEVNVTL	0.0572708	10
>Cluster-58773.163438;orf1 len=994 frame:2 start:254 end:3235 gi|410935705|gb|AFV94409.1| thioester-containing protein 1 [Euprymna scolopes]	1171.61	1172.36	8	16	HCRTETRRL	0.290115	9
>Cluster-58773.163438;orf1 len=994 frame:2 start:254 end:3235 gi|410935705|gb|AFV94409.1| thioester-containing protein 1 [Euprymna scolopes]	1226.58	1227.33	607	617	DVHTSPHSTVF	0.268482	11
>Cluster-58773.163438;orf1 len=994 frame:2 start:254 end:3235 gi|410935705|gb|AFV94409.1| thioester-containing protein 1 [Euprymna scolopes]	1325.57	1326.43	860	870	SSEMTDEVHKY	0.10419	11
>Cluster-58773.163438;orf1 len=994 frame:2 start:254 end:3235 gi|410935705|gb|AFV94409.1| thioester-containing protein 1 [Euprymna scolopes]	1341.56	1342.43	860	870	SSEMTDEVHKY	0.10419	11
>Cluster-58773.163438;orf1 len=994 frame:2 start:254 end:3235 gi|410935705|gb|AFV94409.1| thioester-containing protein 1 [Euprymna scolopes]	1397.68	1398.52	101	113	TVETTVSPDSSKF	0.0560125	13
>Cluster-58773.163438;orf1 len=994 frame:2 start:254 end:3235 gi|410935705|gb|AFV94409.1| thioester-containing protein 1 [Euprymna scolopes]	1418.69	1419.67	938	950	VRKPSGCGEQNMI	0.359674	13
>Cluster-58773.163438;orf1 len=994 frame:2 start:254 end:3235 gi|410935705|gb|AFV94409.1| thioester-containing protein 1 [Euprymna scolopes]	1434.68	1435.67	938	950	VRKPSGCGEQNMI	0.359674	13
>Cluster-58773.163438;orf1 len=994 frame:2 start:254 end:3235 gi|410935705|gb|AFV94409.1| thioester-containing protein 1 [Euprymna scolopes]	1475.71	1476.6	211	224	TNEHSPSGVVSKSF	0.162613	14
>Cluster-58773.163438;orf1 len=994 frame:2 start:254 end:3235 gi|410935705|gb|AFV94409.1| thioester-containing protein 1 [Euprymna scolopes]	1560.8	1561.7	701	716	KDNGPGGKSSGSKQTI	0.419155	16
>Cluster-58773.163438;orf1 len=994 frame:2 start:254 end:3235 gi|410935705|gb|AFV94409.1| thioester-containing protein 1 [Euprymna scolopes]	1734.8	1736.05	450	463	DVPEKQNMNMRMEI	0.420451	14
>Cluster-58773.163438;orf1 len=994 frame:2 start:254 end:3235 gi|410935705|gb|AFV94409.1| thioester-containing protein 1 [Euprymna scolopes]	1750.79	1752.05	450	463	DVPEKQNMNMRMEI	0.420451	14
>Cluster-58773.163438;orf1 len=994 frame:2 start:254 end:3235 gi|410935705|gb|AFV94409.1| thioester-containing protein 1 [Euprymna scolopes]	1766.79	1768.05	450	463	DVPEKQNMNMRMEI	0.420451	14
>Cluster-58773.163438;orf1 len=994 frame:2 start:254 end:3235 gi|410935705|gb|AFV94409.1| thioester-containing protein 1 [Euprymna scolopes]	1782.78	1784.05	450	463	DVPEKQNMNMRMEI	0.420451	14
>sp|O61363|HCYG_ENTDO Hemocyanin G-type, units Oda to Odg OS=Enteroctopus dofleini OX=267067 GN=ODHCY PE=1 SV=1	802.395	802.873	2307	2312	QEHRHL	0.222317	6
>sp|O61363|HCYG_ENTDO Hemocyanin G-type, units Oda to Odg OS=Enteroctopus dofleini OX=267067 GN=ODHCY PE=1 SV=1	806.314	806.877	2831	2837	GGEHEMF	0.570008	7
>sp|O61363|HCYG_ENTDO Hemocyanin G-type, units Oda to Odg OS=Enteroctopus dofleini OX=267067 GN=ODHCY PE=1 SV=1	819.422	819.904	2307	2312	QEHRHL	0.222317	6
>sp|O61363|HCYG_ENTDO Hemocyanin G-type, units Oda to Odg OS=Enteroctopus dofleini OX=267067 GN=ODHCY PE=1 SV=1	819.436	819.941	396	402	PRPTVSY	0.189805	7
>sp|O61363|HCYG_ENTDO Hemocyanin G-type, units Oda to Odg OS=Enteroctopus dofleini OX=267067 GN=ODHCY PE=1 SV=1	822.309	822.877	2831	2837	GGEHEMF	0.570008	7
>sp|O61363|HCYG_ENTDO Hemocyanin G-type, units Oda to Odg OS=Enteroctopus dofleini OX=267067 GN=ODHCY PE=1 SV=1	822.366	822.918	2575	2581	TKQMEDA	0.0541362	7
>sp|O61363|HCYG_ENTDO Hemocyanin G-type, units Oda to Odg OS=Enteroctopus dofleini OX=267067 GN=ODHCY PE=1 SV=1	830.484	830.968	2506	2512	RKNVNSL	0.0883515	7
>sp|O61363|HCYG_ENTDO Hemocyanin G-type, units Oda to Odg OS=Enteroctopus dofleini OX=267067 GN=ODHCY PE=1 SV=1	832.452	832.937	1625	1632	RGVTEVTA	0.0332172	8
>sp|O61363|HCYG_ENTDO Hemocyanin G-type, units Oda to Odg OS=Enteroctopus dofleini OX=267067 GN=ODHCY PE=1 SV=1	835.398	835.96	1195	1201	TQQMKEA	0.0603143	7
>sp|O61363|HCYG_ENTDO Hemocyanin G-type, units Oda to Odg OS=Enteroctopus dofleini OX=267067 GN=ODHCY PE=1 SV=1	837.458	837.96	660	666	SEVHRPL	0.307476	7
>sp|O61363|HCYG_ENTDO Hemocyanin G-type, units Oda to Odg OS=Enteroctopus dofleini OX=267067 GN=ODHCY PE=1 SV=1	838.361	838.917	2575	2581	TKQMEDA	0.0541362	7
>sp|O61363|HCYG_ENTDO Hemocyanin G-type, units Oda to Odg OS=Enteroctopus dofleini OX=267067 GN=ODHCY PE=1 SV=1	848.429	849.002	707	714	GGMSVREL	0.331735	8
>sp|O61363|HCYG_ENTDO Hemocyanin G-type, units Oda to Odg OS=Enteroctopus dofleini OX=267067 GN=ODHCY PE=1 SV=1	851.393	851.959	1195	1201	TQQMKEA	0.0603143	7
>sp|O61363|HCYG_ENTDO Hemocyanin G-type, units Oda to Odg OS=Enteroctopus dofleini OX=267067 GN=ODHCY PE=1 SV=1	853.376	853.975	1934	1940	SKPEDMF	0.704257	7
>sp|O61363|HCYG_ENTDO Hemocyanin G-type, units Oda to Odg OS=Enteroctopus dofleini OX=267067 GN=ODHCY PE=1 SV=1	856.416	856.916	1857	1864	GGKEEHSL	0.100101	8
>sp|O61363|HCYG_ENTDO Hemocyanin G-type, units Oda to Odg OS=Enteroctopus dofleini OX=267067 GN=ODHCY PE=1 SV=1	859.474	859.966	559	565	RNVDSRL	0.198041	7
>sp|O61363|HCYG_ENTDO Hemocyanin G-type, units Oda to Odg OS=Enteroctopus dofleini OX=267067 GN=ODHCY PE=1 SV=1	860.445	861.06	1488	1494	NVPMRPF	0.853557	7
>sp|O61363|HCYG_ENTDO Hemocyanin G-type, units Oda to Odg OS=Enteroctopus dofleini OX=267067 GN=ODHCY PE=1 SV=1	860.472	860.989	2466	2473	ETVDGKVL	0.0771665	8
>sp|O61363|HCYG_ENTDO Hemocyanin G-type, units Oda to Odg OS=Enteroctopus dofleini OX=267067 GN=ODHCY PE=1 SV=1	862.46	863.076	1076	1082	RKPMSPF	0.808003	7
>sp|O61363|HCYG_ENTDO Hemocyanin G-type, units Oda to Odg OS=Enteroctopus dofleini OX=267067 GN=ODHCY PE=1 SV=1	864.356	864.958	2013	2020	GGSTEMPW	0.676037	8
>sp|O61363|HCYG_ENTDO Hemocyanin G-type, units Oda to Odg OS=Enteroctopus dofleini OX=267067 GN=ODHCY PE=1 SV=1	864.424	865.002	707	714	GGMSVREL	0.331735	8
>sp|O61363|HCYG_ENTDO Hemocyanin G-type, units Oda to Odg OS=Enteroctopus dofleini OX=267067 GN=ODHCY PE=1 SV=1	867.34	867.912	1265	1272	TDGDMESL	0.183465	8
>sp|O61363|HCYG_ENTDO Hemocyanin G-type, units Oda to Odg OS=Enteroctopus dofleini OX=267067 GN=ODHCY PE=1 SV=1	869.371	869.974	1934	1940	SKPEDMF	0.704257	7
>sp|O61363|HCYG_ENTDO Hemocyanin G-type, units Oda to Odg OS=Enteroctopus dofleini OX=267067 GN=ODHCY PE=1 SV=1	873.49	873.993	2089	2095	RRNVESL	0.0766867	7
>sp|O61363|HCYG_ENTDO Hemocyanin G-type, units Oda to Odg OS=Enteroctopus dofleini OX=267067 GN=ODHCY PE=1 SV=1	876.44	877.059	1488	1494	NVPMRPF	0.853557	7
>sp|O61363|HCYG_ENTDO Hemocyanin G-type, units Oda to Odg OS=Enteroctopus dofleini OX=267067 GN=ODHCY PE=1 SV=1	878.455	879.075	1076	1082	RKPMSPF	0.808003	7
>sp|O61363|HCYG_ENTDO Hemocyanin G-type, units Oda to Odg OS=Enteroctopus dofleini OX=267067 GN=ODHCY PE=1 SV=1	880.351	880.957	2013	2020	GGSTEMPW	0.676037	8
>sp|O61363|HCYG_ENTDO Hemocyanin G-type, units Oda to Odg OS=Enteroctopus dofleini OX=267067 GN=ODHCY PE=1 SV=1	881.448	881.97	1651	1658	VPKQDHSA	0.111304	8
>sp|O61363|HCYG_ENTDO Hemocyanin G-type, units Oda to Odg OS=Enteroctopus dofleini OX=267067 GN=ODHCY PE=1 SV=1	883.335	883.912	1265	1272	TDGDMESL	0.183465	8
>sp|O61363|HCYG_ENTDO Hemocyanin G-type, units Oda to Odg OS=Enteroctopus dofleini OX=267067 GN=ODHCY PE=1 SV=1	885.429	886.067	240	246	HKPMEPF	0.734071	7
>sp|O61363|HCYG_ENTDO Hemocyanin G-type, units Oda to Odg OS=Enteroctopus dofleini OX=267067 GN=ODHCY PE=1 SV=1	886.42	887.011	1500	1506	NHDRMTL	0.363662	7
>sp|O61363|HCYG_ENTDO Hemocyanin G-type, units Oda to Odg OS=Enteroctopus dofleini OX=267067 GN=ODHCY PE=1 SV=1	891.403	892.027	1592	1599	GGKSEMPW	0.634589	8
>sp|O61363|HCYG_ENTDO Hemocyanin G-type, units Oda to Odg OS=Enteroctopus dofleini OX=267067 GN=ODHCY PE=1 SV=1	901.424	902.066	240	246	HKPMEPF	0.734071	7
>sp|O61363|HCYG_ENTDO Hemocyanin G-type, units Oda to Odg OS=Enteroctopus dofleini OX=267067 GN=ODHCY PE=1 SV=1	902.415	903.01	1500	1506	NHDRMTL	0.363662	7
>sp|O61363|HCYG_ENTDO Hemocyanin G-type, units Oda to Odg OS=Enteroctopus dofleini OX=267067 GN=ODHCY PE=1 SV=1	905.346	905.967	2421	2428	GGDNEMPW	0.778264	8
>sp|O61363|HCYG_ENTDO Hemocyanin G-type, units Oda to Odg OS=Enteroctopus dofleini OX=267067 GN=ODHCY PE=1 SV=1	907.398	908.027	1592	1599	GGKSEMPW	0.634589	8
>sp|O61363|HCYG_ENTDO Hemocyanin G-type, units Oda to Odg OS=Enteroctopus dofleini OX=267067 GN=ODHCY PE=1 SV=1	913.416	913.971	2790	2796	QHEDRVF	0.372931	7
>sp|O61363|HCYG_ENTDO Hemocyanin G-type, units Oda to Odg OS=Enteroctopus dofleini OX=267067 GN=ODHCY PE=1 SV=1	916.398	917.037	344	351	GGVHEMTW	0.479901	8
>sp|O61363|HCYG_ENTDO Hemocyanin G-type, units Oda to Odg OS=Enteroctopus dofleini OX=267067 GN=ODHCY PE=1 SV=1	921.341	921.966	2421	2428	GGDNEMPW	0.778264	8
>sp|O61363|HCYG_ENTDO Hemocyanin G-type, units Oda to Odg OS=Enteroctopus dofleini OX=267067 GN=ODHCY PE=1 SV=1	923.393	924.026	762	769	GGSKEMEW	0.438552	8
>sp|O61363|HCYG_ENTDO Hemocyanin G-type, units Oda to Odg OS=Enteroctopus dofleini OX=267067 GN=ODHCY PE=1 SV=1	930.443	931.002	2790	2796	QHEDRVF	0.372931	7
>sp|O61363|HCYG_ENTDO Hemocyanin G-type, units Oda to Odg OS=Enteroctopus dofleini OX=267067 GN=ODHCY PE=1 SV=1	932.393	933.037	344	351	GGVHEMTW	0.479901	8
>sp|O61363|HCYG_ENTDO Hemocyanin G-type, units Oda to Odg OS=Enteroctopus dofleini OX=267067 GN=ODHCY PE=1 SV=1	939.388	940.025	762	769	GGSKEMEW	0.438552	8
>sp|O61363|HCYG_ENTDO Hemocyanin G-type, units Oda to Odg OS=Enteroctopus dofleini OX=267067 GN=ODHCY PE=1 SV=1	955.4	955.959	1661	1668	KSEEGNEY	0.0637241	8
>sp|O61363|HCYG_ENTDO Hemocyanin G-type, units Oda to Odg OS=Enteroctopus dofleini OX=267067 GN=ODHCY PE=1 SV=1	977.491	978.062	1043	1050	HHSNVDRI	0.211871	8
>sp|O61363|HCYG_ENTDO Hemocyanin G-type, units Oda to Odg OS=Enteroctopus dofleini OX=267067 GN=ODHCY PE=1 SV=1	977.491	978.062	1879	1886	HHSNVDRL	0.329543	8
>sp|O61363|HCYG_ENTDO Hemocyanin G-type, units Oda to Odg OS=Enteroctopus dofleini OX=267067 GN=ODHCY PE=1 SV=1	979.47	980.034	2701	2708	HHSNTDRI	0.233481	8
>sp|O61363|HCYG_ENTDO Hemocyanin G-type, units Oda to Odg OS=Enteroctopus dofleini OX=267067 GN=ODHCY PE=1 SV=1	984.374	985.198	477	485	CCVHGMSTF	0.712209	9
>sp|O61363|HCYG_ENTDO Hemocyanin G-type, units Oda to Odg OS=Enteroctopus dofleini OX=267067 GN=ODHCY PE=1 SV=1	991.507	992.089	631	638	HHSQVDRL	0.282885	8
>sp|O61363|HCYG_ENTDO Hemocyanin G-type, units Oda to Odg OS=Enteroctopus dofleini OX=267067 GN=ODHCY PE=1 SV=1	991.507	992.089	208	215	HHSNVERL	0.275042	8
>sp|O61363|HCYG_ENTDO Hemocyanin G-type, units Oda to Odg OS=Enteroctopus dofleini OX=267067 GN=ODHCY PE=1 SV=1	993.438	994.181	50	59	PDGSTVVCCL	0.659001	10
>sp|O61363|HCYG_ENTDO Hemocyanin G-type, units Oda to Odg OS=Enteroctopus dofleini OX=267067 GN=ODHCY PE=1 SV=1	1000.37	1001.2	477	485	CCVHGMSTF	0.712209	9
>sp|O61363|HCYG_ENTDO Hemocyanin G-type, units Oda to Odg OS=Enteroctopus dofleini OX=267067 GN=ODHCY PE=1 SV=1	1013.36	1014.08	2406	2414	CKDETCEDA	0.108759	9
>sp|O61363|HCYG_ENTDO Hemocyanin G-type, units Oda to Odg OS=Enteroctopus dofleini OX=267067 GN=ODHCY PE=1 SV=1	1013.62	1014.22	1670	1677	VRKNVERL	0.125128	8
>sp|O61363|HCYG_ENTDO Hemocyanin G-type, units Oda to Odg OS=Enteroctopus dofleini OX=267067 GN=ODHCY PE=1 SV=1	1025.4	1026.25	2559	2567	CCQHGMVTF	0.745641	9
>sp|O61363|HCYG_ENTDO Hemocyanin G-type, units Oda to Odg OS=Enteroctopus dofleini OX=267067 GN=ODHCY PE=1 SV=1	1036.46	1037.08	2199	2207	TDNVTENPF	0.129148	9
>sp|O61363|HCYG_ENTDO Hemocyanin G-type, units Oda to Odg OS=Enteroctopus dofleini OX=267067 GN=ODHCY PE=1 SV=1	1041.4	1042.25	2559	2567	CCQHGMVTF	0.745641	9
>sp|O61363|HCYG_ENTDO Hemocyanin G-type, units Oda to Odg OS=Enteroctopus dofleini OX=267067 GN=ODHCY PE=1 SV=1	1049.46	1050.18	2131	2139	CPSPEEPKY	0.495716	9
>sp|O61363|HCYG_ENTDO Hemocyanin G-type, units Oda to Odg OS=Enteroctopus dofleini OX=267067 GN=ODHCY PE=1 SV=1	1056.6	1057.24	2219	2227	TVRDVKPEL	0.0898857	9
>sp|O61363|HCYG_ENTDO Hemocyanin G-type, units Oda to Odg OS=Enteroctopus dofleini OX=267067 GN=ODHCY PE=1 SV=1	1059.58	1060.25	535	543	TKEVKPNPF	0.199075	9
>sp|O61363|HCYG_ENTDO Hemocyanin G-type, units Oda to Odg OS=Enteroctopus dofleini OX=267067 GN=ODHCY PE=1 SV=1	1068.48	1069.12	2607	2615	VTEEKDNSF	0.0634666	9
>sp|O61363|HCYG_ENTDO Hemocyanin G-type, units Oda to Odg OS=Enteroctopus dofleini OX=267067 GN=ODHCY PE=1 SV=1	1075.6	1076.21	836	844	RSRRDVSSL	0.113563	9
>sp|O61363|HCYG_ENTDO Hemocyanin G-type, units Oda to Odg OS=Enteroctopus dofleini OX=267067 GN=ODHCY PE=1 SV=1	1076.57	1077.29	411	420	DMVVVDKTGL	0.178347	10
>sp|O61363|HCYG_ENTDO Hemocyanin G-type, units Oda to Odg OS=Enteroctopus dofleini OX=267067 GN=ODHCY PE=1 SV=1	1086.49	1087.2	1277	1285	KDMTTDGRY	0.179876	9
>sp|O61363|HCYG_ENTDO Hemocyanin G-type, units Oda to Odg OS=Enteroctopus dofleini OX=267067 GN=ODHCY PE=1 SV=1	1092.56	1093.29	411	420	DMVVVDKTGL	0.178347	10
>sp|O61363|HCYG_ENTDO Hemocyanin G-type, units Oda to Odg OS=Enteroctopus dofleini OX=267067 GN=ODHCY PE=1 SV=1	1093.56	1094.29	2291	2299	VHHSMVDRL	0.381176	9
>sp|O61363|HCYG_ENTDO Hemocyanin G-type, units Oda to Odg OS=Enteroctopus dofleini OX=267067 GN=ODHCY PE=1 SV=1	1102.48	1103.2	1277	1285	KDMTTDGRY	0.179876	9
>sp|O61363|HCYG_ENTDO Hemocyanin G-type, units Oda to Odg OS=Enteroctopus dofleini OX=267067 GN=ODHCY PE=1 SV=1	1109.55	1110.29	2291	2299	VHHSMVDRL	0.381176	9
>sp|O61363|HCYG_ENTDO Hemocyanin G-type, units Oda to Odg OS=Enteroctopus dofleini OX=267067 GN=ODHCY PE=1 SV=1	1118.55	1119.19	2624	2633	NTDTTRSPRA	0.0788184	10
>sp|O61363|HCYG_ENTDO Hemocyanin G-type, units Oda to Odg OS=Enteroctopus dofleini OX=267067 GN=ODHCY PE=1 SV=1	1123.49	1124.16	2637	2646	DDPDKGDKSF	0.489093	10
>sp|O61363|HCYG_ENTDO Hemocyanin G-type, units Oda to Odg OS=Enteroctopus dofleini OX=267067 GN=ODHCY PE=1 SV=1	1134.62	1135.31	821	831	SPGKKESGVVF	0.387796	11
>sp|O61363|HCYG_ENTDO Hemocyanin G-type, units Oda to Odg OS=Enteroctopus dofleini OX=267067 GN=ODHCY PE=1 SV=1	1143.52	1144.26	1433	1443	GGRDPHSMSSL	0.597154	11
>sp|O61363|HCYG_ENTDO Hemocyanin G-type, units Oda to Odg OS=Enteroctopus dofleini OX=267067 GN=ODHCY PE=1 SV=1	1153.57	1154.28	567	576	EKPTKGHHGY	0.161443	10
>sp|O61363|HCYG_ENTDO Hemocyanin G-type, units Oda to Odg OS=Enteroctopus dofleini OX=267067 GN=ODHCY PE=1 SV=1	1156.45	1157.2	25	34	MQDDETPTGY	0.177116	10
>sp|O61363|HCYG_ENTDO Hemocyanin G-type, units Oda to Odg OS=Enteroctopus dofleini OX=267067 GN=ODHCY PE=1 SV=1	1159.52	1160.26	1433	1443	GGRDPHSMSSL	0.597154	11
>sp|O61363|HCYG_ENTDO Hemocyanin G-type, units Oda to Odg OS=Enteroctopus dofleini OX=267067 GN=ODHCY PE=1 SV=1	1169.6	1170.28	1543	1551	EERKSHDRI	0.0833741	9
>sp|O61363|HCYG_ENTDO Hemocyanin G-type, units Oda to Odg OS=Enteroctopus dofleini OX=267067 GN=ODHCY PE=1 SV=1	1172.44	1173.2	25	34	MQDDETPTGY	0.177116	10
>sp|O61363|HCYG_ENTDO Hemocyanin G-type, units Oda to Odg OS=Enteroctopus dofleini OX=267067 GN=ODHCY PE=1 SV=1	1188.44	1189.21	1999	2009	EGGECHEGSHF	0.366796	11
>sp|O61363|HCYG_ENTDO Hemocyanin G-type, units Oda to Odg OS=Enteroctopus dofleini OX=267067 GN=ODHCY PE=1 SV=1	1217.48	1218.35	2813	2823	DVCTKDGECTF	0.303314	11
>sp|O61363|HCYG_ENTDO Hemocyanin G-type, units Oda to Odg OS=Enteroctopus dofleini OX=267067 GN=ODHCY PE=1 SV=1	1221.56	1222.37	1297	1307	QCPNKDGSKVY	0.35103	11
>sp|O61363|HCYG_ENTDO Hemocyanin G-type, units Oda to Odg OS=Enteroctopus dofleini OX=267067 GN=ODHCY PE=1 SV=1	1238.58	1239.4	1297	1307	QCPNKDGSKVY	0.35103	11
>sp|O61363|HCYG_ENTDO Hemocyanin G-type, units Oda to Odg OS=Enteroctopus dofleini OX=267067 GN=ODHCY PE=1 SV=1	1256.52	1257.27	947	957	DENGETHPNPF	0.312192	11
>sp|O61363|HCYG_ENTDO Hemocyanin G-type, units Oda to Odg OS=Enteroctopus dofleini OX=267067 GN=ODHCY PE=1 SV=1	1299.69	1300.47	2378	2387	HKQQNKDRVF	0.248269	10
>sp|O61363|HCYG_ENTDO Hemocyanin G-type, units Oda to Odg OS=Enteroctopus dofleini OX=267067 GN=ODHCY PE=1 SV=1	1309.65	1310.42	966	977	GEHTTRSPNPTL	0.164025	12
>sp|O61363|HCYG_ENTDO Hemocyanin G-type, units Oda to Odg OS=Enteroctopus dofleini OX=267067 GN=ODHCY PE=1 SV=1	1312.69	1313.47	293	302	KERQQHPRSF	0.299487	10
>sp|O61363|HCYG_ENTDO Hemocyanin G-type, units Oda to Odg OS=Enteroctopus dofleini OX=267067 GN=ODHCY PE=1 SV=1	1315.61	1316.49	1091	1101	DPMTREHSVPF	0.274601	11
>sp|O61363|HCYG_ENTDO Hemocyanin G-type, units Oda to Odg OS=Enteroctopus dofleini OX=267067 GN=ODHCY PE=1 SV=1	1317.56	1318.48	1571	1582	CVPTSKHEENCA	0.191903	12
>sp|O61363|HCYG_ENTDO Hemocyanin G-type, units Oda to Odg OS=Enteroctopus dofleini OX=267067 GN=ODHCY PE=1 SV=1	1331.6	1332.49	1091	1101	DPMTREHSVPF	0.274601	11
>sp|O61363|HCYG_ENTDO Hemocyanin G-type, units Oda to Odg OS=Enteroctopus dofleini OX=267067 GN=ODHCY PE=1 SV=1	1331.61	1332.45	2161	2172	EDSMRRHGSSVA	0.133332	12
>sp|O61363|HCYG_ENTDO Hemocyanin G-type, units Oda to Odg OS=Enteroctopus dofleini OX=267067 GN=ODHCY PE=1 SV=1	1347.61	1348.45	2161	2172	EDSMRRHGSSVA	0.133332	12
>sp|O61363|HCYG_ENTDO Hemocyanin G-type, units Oda to Odg OS=Enteroctopus dofleini OX=267067 GN=ODHCY PE=1 SV=1	1365.69	1366.49	1969	1978	RHQRDHDRVF	0.282993	10
>sp|O61363|HCYG_ENTDO Hemocyanin G-type, units Oda to Odg OS=Enteroctopus dofleini OX=267067 GN=ODHCY PE=1 SV=1	1367.78	1368.59	2492	2503	KREVHKKTVGDA	0.0811223	12
>sp|O61363|HCYG_ENTDO Hemocyanin G-type, units Oda to Odg OS=Enteroctopus dofleini OX=267067 GN=ODHCY PE=1 SV=1	1419.65	1420.49	2108	2119	TRVKEDESDHGF	0.0883628	12
>sp|O61363|HCYG_ENTDO Hemocyanin G-type, units Oda to Odg OS=Enteroctopus dofleini OX=267067 GN=ODHCY PE=1 SV=1	1431.63	1432.45	1384	1395	NSETNRDPQEEL	0.0671973	12
>sp|O61363|HCYG_ENTDO Hemocyanin G-type, units Oda to Odg OS=Enteroctopus dofleini OX=267067 GN=ODHCY PE=1 SV=1	1482.72	1483.66	1690	1701	RRMQRDKSSDGF	0.178885	12
>sp|O61363|HCYG_ENTDO Hemocyanin G-type, units Oda to Odg OS=Enteroctopus dofleini OX=267067 GN=ODHCY PE=1 SV=1	1498.72	1499.66	1690	1701	RRMQRDKSSDGF	0.178885	12
>sp|O61363|HCYG_ENTDO Hemocyanin G-type, units Oda to Odg OS=Enteroctopus dofleini OX=267067 GN=ODHCY PE=1 SV=1	1572.7	1573.62	1800	1812	SEDTETKREVSEY	0.0372266	13
>sp|O61363|HCYG_ENTDO Hemocyanin G-type, units Oda to Odg OS=Enteroctopus dofleini OX=267067 GN=ODHCY PE=1 SV=1	1871.89	1873.01	676	691	NNNKHTHSHSVPTHVY	0.0673253	16
>sp|O61363|HCYG_ENTDO Hemocyanin G-type, units Oda to Odg OS=Enteroctopus dofleini OX=267067 GN=ODHCY PE=1 SV=1	2042.87	2044.14	323	340	PSEDKRHSDNCNNHVGSF	0.437308	18
>tr|A0A0L8GNM6|A0A0L8GNM6_OCTBM Uncharacterized protein OS=Octopus bimaculoides OX=37653 GN=OCBIM_22031096mg PE=4 SV=1	806.314	806.877	866	872	GGEHEMF	0.570008	7
>tr|A0A0L8GNM6|A0A0L8GNM6_OCTBM Uncharacterized protein OS=Octopus bimaculoides OX=37653 GN=OCBIM_22031096mg PE=4 SV=1	812.291	812.901	850	857	CTKDGDCA	0.260544	8
>tr|A0A0L8GNM6|A0A0L8GNM6_OCTBM Uncharacterized protein OS=Octopus bimaculoides OX=37653 GN=OCBIM_22031096mg PE=4 SV=1	820.387	820.945	672	678	VKQMEDA	0.0663594	7
>tr|A0A0L8GNM6|A0A0L8GNM6_OCTBM Uncharacterized protein OS=Octopus bimaculoides OX=37653 GN=OCBIM_22031096mg PE=4 SV=1	822.309	822.877	866	872	GGEHEMF	0.570008	7
>tr|A0A0L8GNM6|A0A0L8GNM6_OCTBM Uncharacterized protein OS=Octopus bimaculoides OX=37653 GN=OCBIM_22031096mg PE=4 SV=1	835.434	836.004	373	379	TKQMKEA	0.0483105	7
>tr|A0A0L8GNM6|A0A0L8GNM6_OCTBM Uncharacterized protein OS=Octopus bimaculoides OX=37653 GN=OCBIM_22031096mg PE=4 SV=1	836.382	836.945	672	678	VKQMEDA	0.0663594	7
>tr|A0A0L8GNM6|A0A0L8GNM6_OCTBM Uncharacterized protein OS=Octopus bimaculoides OX=37653 GN=OCBIM_22031096mg PE=4 SV=1	851.429	852.003	373	379	TKQMKEA	0.0483105	7
>tr|A0A0L8GNM6|A0A0L8GNM6_OCTBM Uncharacterized protein OS=Octopus bimaculoides OX=37653 GN=OCBIM_22031096mg PE=4 SV=1	862.46	863.076	254	260	RKPMSPF	0.808003	7
>tr|A0A0L8GNM6|A0A0L8GNM6_OCTBM Uncharacterized protein OS=Octopus bimaculoides OX=37653 GN=OCBIM_22031096mg PE=4 SV=1	878.437	878.966	788	795	HSTGKTTF	0.204091	8
>tr|A0A0L8GNM6|A0A0L8GNM6_OCTBM Uncharacterized protein OS=Octopus bimaculoides OX=37653 GN=OCBIM_22031096mg PE=4 SV=1	878.455	879.075	254	260	RKPMSPF	0.808003	7
>tr|A0A0L8GNM6|A0A0L8GNM6_OCTBM Uncharacterized protein OS=Octopus bimaculoides OX=37653 GN=OCBIM_22031096mg PE=4 SV=1	903.501	904.02	721	728	NKNTTRVA	0.0522821	8
>tr|A0A0L8GNM6|A0A0L8GNM6_OCTBM Uncharacterized protein OS=Octopus bimaculoides OX=37653 GN=OCBIM_22031096mg PE=4 SV=1	928.412	928.939	340	348	HGSTDQVNA	0.101964	9
>tr|A0A0L8GNM6|A0A0L8GNM6_OCTBM Uncharacterized protein OS=Octopus bimaculoides OX=37653 GN=OCBIM_22031096mg PE=4 SV=1	979.47	980.034	777	784	HHSNTDRI	0.233481	8
>tr|A0A0L8GNM6|A0A0L8GNM6_OCTBM Uncharacterized protein OS=Octopus bimaculoides OX=37653 GN=OCBIM_22031096mg PE=4 SV=1	991.507	992.089	220	227	HHSQVDRL	0.282885	8
>tr|A0A0L8GNM6|A0A0L8GNM6_OCTBM Uncharacterized protein OS=Octopus bimaculoides OX=37653 GN=OCBIM_22031096mg PE=4 SV=1	1025.4	1026.25	656	664	CCQHGMVTF	0.745641	9
>tr|A0A0L8GNM6|A0A0L8GNM6_OCTBM Uncharacterized protein OS=Octopus bimaculoides OX=37653 GN=OCBIM_22031096mg PE=4 SV=1	1041.4	1042.25	656	664	CCQHGMVTF	0.745641	9
>tr|A0A0L8GNM6|A0A0L8GNM6_OCTBM Uncharacterized protein OS=Octopus bimaculoides OX=37653 GN=OCBIM_22031096mg PE=4 SV=1	1077.52	1078.17	704	712	VTEKENNPF	0.0988407	9
>tr|A0A0L8GNM6|A0A0L8GNM6_OCTBM Uncharacterized protein OS=Octopus bimaculoides OX=37653 GN=OCBIM_22031096mg PE=4 SV=1	1087.59	1088.26	124	132	TKEVRPNPF	0.218056	9
>tr|A0A0L8GNM6|A0A0L8GNM6_OCTBM Uncharacterized protein OS=Octopus bimaculoides OX=37653 GN=OCBIM_22031096mg PE=4 SV=1	1153.57	1154.28	156	165	EKPTKGHHGY	0.161443	10
>tr|A0A0L8GNM6|A0A0L8GNM6_OCTBM Uncharacterized protein OS=Octopus bimaculoides OX=37653 GN=OCBIM_22031096mg PE=4 SV=1	1221.56	1222.37	475	485	QCPNKDGSKVY	0.35103	11
>tr|A0A0L8GNM6|A0A0L8GNM6_OCTBM Uncharacterized protein OS=Octopus bimaculoides OX=37653 GN=OCBIM_22031096mg PE=4 SV=1	1238.58	1239.4	475	485	QCPNKDGSKVY	0.35103	11
>tr|A0A0L8GNM6|A0A0L8GNM6_OCTBM Uncharacterized protein OS=Octopus bimaculoides OX=37653 GN=OCBIM_22031096mg PE=4 SV=1	1319.76	1320.62	310	319	NRRRMKGRVF	0.362318	10
>tr|A0A0L8GNM6|A0A0L8GNM6_OCTBM Uncharacterized protein OS=Octopus bimaculoides OX=37653 GN=OCBIM_22031096mg PE=4 SV=1	1335.75	1336.62	310	319	NRRRMKGRVF	0.362318	10
>tr|A0A0L8GNM6|A0A0L8GNM6_OCTBM Uncharacterized protein OS=Octopus bimaculoides OX=37653 GN=OCBIM_22031096mg PE=4 SV=1	1412.75	1413.58	562	573	NSETKRDPQPKL	0.195449	12
>tr|A0A0L8GNM6|A0A0L8GNM6_OCTBM Uncharacterized protein OS=Octopus bimaculoides OX=37653 GN=OCBIM_22031096mg PE=4 SV=1	1518.7	1519.69	267	279	NVDSMTREHSVPF	0.15307	13
>tr|A0A0L8GNM6|A0A0L8GNM6_OCTBM Uncharacterized protein OS=Octopus bimaculoides OX=37653 GN=OCBIM_22031096mg PE=4 SV=1	1534.7	1535.69	267	279	NVDSMTREHSVPF	0.15307	13
>tr|A0A7E6FK29|A0A7E6FK29_OCTVU mucin-19-like OS=Octopus vulgaris OX=6645 GN=LOC115224399 PE=4 SV=1	802.376	802.93	307	313	HMTPTSI	0.138098	7
>tr|A0A7E6FK29|A0A7E6FK29_OCTVU mucin-19-like OS=Octopus vulgaris OX=6645 GN=LOC115224399 PE=4 SV=1	806.233	806.85	5617	5623	TDDCCSY	0.322107	7
>tr|A0A7E6FK29|A0A7E6FK29_OCTVU mucin-19-like OS=Octopus vulgaris OX=6645 GN=LOC115224399 PE=4 SV=1	806.408	806.962	1060	1066	CTKNVEL	0.0896488	7
>tr|A0A7E6FK29|A0A7E6FK29_OCTVU mucin-19-like OS=Octopus vulgaris OX=6645 GN=LOC115224399 PE=4 SV=1	812.336	812.885	190	196	GDQSCRF	0.836957	7
>tr|A0A7E6FK29|A0A7E6FK29_OCTVU mucin-19-like OS=Octopus vulgaris OX=6645 GN=LOC115224399 PE=4 SV=1	813.392	813.957	197	202	KDTRMF	0.642658	6
>tr|A0A7E6FK29|A0A7E6FK29_OCTVU mucin-19-like OS=Octopus vulgaris OX=6645 GN=LOC115224399 PE=4 SV=1	817.285	817.92	172	178	ECTTCNF	0.427297	7
>tr|A0A7E6FK29|A0A7E6FK29_OCTVU mucin-19-like OS=Octopus vulgaris OX=6645 GN=LOC115224399 PE=4 SV=1	818.371	818.929	5923	5929	PKEDCNL	0.335945	7
>tr|A0A7E6FK29|A0A7E6FK29_OCTVU mucin-19-like OS=Octopus vulgaris OX=6645 GN=LOC115224399 PE=4 SV=1	820.416	820.883	1638	1645	STPTSTRA	0.118536	8
>tr|A0A7E6FK29|A0A7E6FK29_OCTVU mucin-19-like OS=Octopus vulgaris OX=6645 GN=LOC115224399 PE=4 SV=1	820.416	820.883	1781	1788	STPTSTRA	0.118536	8
>tr|A0A7E6FK29|A0A7E6FK29_OCTVU mucin-19-like OS=Octopus vulgaris OX=6645 GN=LOC115224399 PE=4 SV=1	820.416	820.883	1889	1896	STPTSTRA	0.118536	8
>tr|A0A7E6FK29|A0A7E6FK29_OCTVU mucin-19-like OS=Octopus vulgaris OX=6645 GN=LOC115224399 PE=4 SV=1	820.416	820.883	1983	1990	STPTSTRA	0.118536	8
>tr|A0A7E6FK29|A0A7E6FK29_OCTVU mucin-19-like OS=Octopus vulgaris OX=6645 GN=LOC115224399 PE=4 SV=1	820.416	820.883	2203	2210	STPTSTRA	0.118536	8
>tr|A0A7E6FK29|A0A7E6FK29_OCTVU mucin-19-like OS=Octopus vulgaris OX=6645 GN=LOC115224399 PE=4 SV=1	820.416	820.883	2310	2317	STPTSTRA	0.118536	8
>tr|A0A7E6FK29|A0A7E6FK29_OCTVU mucin-19-like OS=Octopus vulgaris OX=6645 GN=LOC115224399 PE=4 SV=1	820.416	820.883	2833	2840	STPTSTRA	0.118536	8
>tr|A0A7E6FK29|A0A7E6FK29_OCTVU mucin-19-like OS=Octopus vulgaris OX=6645 GN=LOC115224399 PE=4 SV=1	820.416	820.883	3176	3183	STPTSTRA	0.118536	8
>tr|A0A7E6FK29|A0A7E6FK29_OCTVU mucin-19-like OS=Octopus vulgaris OX=6645 GN=LOC115224399 PE=4 SV=1	820.416	820.883	3756	3763	STPTSTRA	0.118536	8
>tr|A0A7E6FK29|A0A7E6FK29_OCTVU mucin-19-like OS=Octopus vulgaris OX=6645 GN=LOC115224399 PE=4 SV=1	820.416	820.883	4175	4182	STPTSTRA	0.118536	8
>tr|A0A7E6FK29|A0A7E6FK29_OCTVU mucin-19-like OS=Octopus vulgaris OX=6645 GN=LOC115224399 PE=4 SV=1	820.416	820.883	4221	4228	STPTSTRA	0.118536	8
>tr|A0A7E6FK29|A0A7E6FK29_OCTVU mucin-19-like OS=Octopus vulgaris OX=6645 GN=LOC115224399 PE=4 SV=1	822.312	822.94	5883	5890	DCEPKCGA	0.534692	8
>tr|A0A7E6FK29|A0A7E6FK29_OCTVU mucin-19-like OS=Octopus vulgaris OX=6645 GN=LOC115224399 PE=4 SV=1	822.384	822.852	5111	5119	PTTSTSGTA	0.0625694	9
>tr|A0A7E6FK29|A0A7E6FK29_OCTVU mucin-19-like OS=Octopus vulgaris OX=6645 GN=LOC115224399 PE=4 SV=1	823.35	823.902	5860	5866	ESKECDL	0.165841	7
>tr|A0A7E6FK29|A0A7E6FK29_OCTVU mucin-19-like OS=Octopus vulgaris OX=6645 GN=LOC115224399 PE=4 SV=1	838.351	838.923	486	492	CPDGQRY	0.687574	7
>tr|A0A7E6FK29|A0A7E6FK29_OCTVU mucin-19-like OS=Octopus vulgaris OX=6645 GN=LOC115224399 PE=4 SV=1	839.375	840.014	840	847	SQCKTGCI	0.471752	8
>tr|A0A7E6FK29|A0A7E6FK29_OCTVU mucin-19-like OS=Octopus vulgaris OX=6645 GN=LOC115224399 PE=4 SV=1	848.303	848.937	1230	1237	HDSCGCNL	0.69783	8
>tr|A0A7E6FK29|A0A7E6FK29_OCTVU mucin-19-like OS=Octopus vulgaris OX=6645 GN=LOC115224399 PE=4 SV=1	848.379	848.921	1265	1271	RNNDRCA	0.328139	7
>tr|A0A7E6FK29|A0A7E6FK29_OCTVU mucin-19-like OS=Octopus vulgaris OX=6645 GN=LOC115224399 PE=4 SV=1	852.394	852.878	2077	2085	STPTTSTSA	0.0514864	9
>tr|A0A7E6FK29|A0A7E6FK29_OCTVU mucin-19-like OS=Octopus vulgaris OX=6645 GN=LOC115224399 PE=4 SV=1	852.394	852.878	2927	2935	STPTTSTSA	0.0514864	9
>tr|A0A7E6FK29|A0A7E6FK29_OCTVU mucin-19-like OS=Octopus vulgaris OX=6645 GN=LOC115224399 PE=4 SV=1	868.333	869.012	991	997	ECMNSVW	0.391956	7
>tr|A0A7E6FK29|A0A7E6FK29_OCTVU mucin-19-like OS=Octopus vulgaris OX=6645 GN=LOC115224399 PE=4 SV=1	871.5	872.018	336	343	QKRSGVTL	0.138932	8
>tr|A0A7E6FK29|A0A7E6FK29_OCTVU mucin-19-like OS=Octopus vulgaris OX=6645 GN=LOC115224399 PE=4 SV=1	873.483	874.034	1076	1083	VQGKPPTF	0.563679	8
>tr|A0A7E6FK29|A0A7E6FK29_OCTVU mucin-19-like OS=Octopus vulgaris OX=6645 GN=LOC115224399 PE=4 SV=1	875.41	875.916	882	889	ENGESVQI	0.0515856	8
>tr|A0A7E6FK29|A0A7E6FK29_OCTVU mucin-19-like OS=Octopus vulgaris OX=6645 GN=LOC115224399 PE=4 SV=1	879.34	879.923	1317	1324	VEDGEDCI	0.11598	8
>tr|A0A7E6FK29|A0A7E6FK29_OCTVU mucin-19-like OS=Octopus vulgaris OX=6645 GN=LOC115224399 PE=4 SV=1	880.389	880.889	1691	1699	SETTPSTSA	0.0558782	9
>tr|A0A7E6FK29|A0A7E6FK29_OCTVU mucin-19-like OS=Octopus vulgaris OX=6645 GN=LOC115224399 PE=4 SV=1	880.389	880.889	1942	1950	SETTPSTSA	0.0558782	9
>tr|A0A7E6FK29|A0A7E6FK29_OCTVU mucin-19-like OS=Octopus vulgaris OX=6645 GN=LOC115224399 PE=4 SV=1	880.389	880.889	2036	2044	SETTPSTSA	0.0558782	9
>tr|A0A7E6FK29|A0A7E6FK29_OCTVU mucin-19-like OS=Octopus vulgaris OX=6645 GN=LOC115224399 PE=4 SV=1	880.389	880.889	2269	2277	SETTPSTSA	0.0558782	9
>tr|A0A7E6FK29|A0A7E6FK29_OCTVU mucin-19-like OS=Octopus vulgaris OX=6645 GN=LOC115224399 PE=4 SV=1	880.389	880.889	2363	2371	SETTPSTSA	0.0558782	9
>tr|A0A7E6FK29|A0A7E6FK29_OCTVU mucin-19-like OS=Octopus vulgaris OX=6645 GN=LOC115224399 PE=4 SV=1	880.389	880.889	2675	2683	SETTPSTSA	0.0558782	9
>tr|A0A7E6FK29|A0A7E6FK29_OCTVU mucin-19-like OS=Octopus vulgaris OX=6645 GN=LOC115224399 PE=4 SV=1	880.389	880.889	2751	2759	SETTPSTSA	0.0558782	9
>tr|A0A7E6FK29|A0A7E6FK29_OCTVU mucin-19-like OS=Octopus vulgaris OX=6645 GN=LOC115224399 PE=4 SV=1	880.389	880.889	2886	2894	SETTPSTSA	0.0558782	9
>tr|A0A7E6FK29|A0A7E6FK29_OCTVU mucin-19-like OS=Octopus vulgaris OX=6645 GN=LOC115224399 PE=4 SV=1	884.328	885.011	991	997	ECMNSVW	0.391956	7
>tr|A0A7E6FK29|A0A7E6FK29_OCTVU mucin-19-like OS=Octopus vulgaris OX=6645 GN=LOC115224399 PE=4 SV=1	888.323	888.999	1363	1370	KCDCTDGF	0.724746	8
>tr|A0A7E6FK29|A0A7E6FK29_OCTVU mucin-19-like OS=Octopus vulgaris OX=6645 GN=LOC115224399 PE=4 SV=1	888.526	889.049	336	343	QKRSGVTL	0.138932	8
>tr|A0A7E6FK29|A0A7E6FK29_OCTVU mucin-19-like OS=Octopus vulgaris OX=6645 GN=LOC115224399 PE=4 SV=1	893.313	893.975	5550	5557	CHESDSCI	0.260706	8
>tr|A0A7E6FK29|A0A7E6FK29_OCTVU mucin-19-like OS=Octopus vulgaris OX=6645 GN=LOC115224399 PE=4 SV=1	896.364	897.066	5558	5566	PGCVCPTGY	0.766514	9
>tr|A0A7E6FK29|A0A7E6FK29_OCTVU mucin-19-like OS=Octopus vulgaris OX=6645 GN=LOC115224399 PE=4 SV=1	908.421	908.943	1469	1477	TTPTESTTA	0.0292332	9
>tr|A0A7E6FK29|A0A7E6FK29_OCTVU mucin-19-like OS=Octopus vulgaris OX=6645 GN=LOC115224399 PE=4 SV=1	911.356	911.971	5946	5952	DPERECY	0.287973	7
>tr|A0A7E6FK29|A0A7E6FK29_OCTVU mucin-19-like OS=Octopus vulgaris OX=6645 GN=LOC115224399 PE=4 SV=1	915.41	916.009	5915	5922	RNESGHCI	0.208817	8
>tr|A0A7E6FK29|A0A7E6FK29_OCTVU mucin-19-like OS=Octopus vulgaris OX=6645 GN=LOC115224399 PE=4 SV=1	922.436	922.97	5317	5325	ETTPSTSSL	0.062479	9
>tr|A0A7E6FK29|A0A7E6FK29_OCTVU mucin-19-like OS=Octopus vulgaris OX=6645 GN=LOC115224399 PE=4 SV=1	925.391	926.108	965	972	PSQCPCKY	0.808819	8
>tr|A0A7E6FK29|A0A7E6FK29_OCTVU mucin-19-like OS=Octopus vulgaris OX=6645 GN=LOC115224399 PE=4 SV=1	926.458	927.008	753	760	SVVRSDTY	0.0934955	8
>tr|A0A7E6FK29|A0A7E6FK29_OCTVU mucin-19-like OS=Octopus vulgaris OX=6645 GN=LOC115224399 PE=4 SV=1	928.446	929.095	604	610	NVKMHHY	0.155212	7
>tr|A0A7E6FK29|A0A7E6FK29_OCTVU mucin-19-like OS=Octopus vulgaris OX=6645 GN=LOC115224399 PE=4 SV=1	936.409	937.022	5453	5460	EQSKDCNI	0.164327	8
>tr|A0A7E6FK29|A0A7E6FK29_OCTVU mucin-19-like OS=Octopus vulgaris OX=6645 GN=LOC115224399 PE=4 SV=1	937.447	937.985	3210	3219	PTTSTGTTTA	0.0412048	10
>tr|A0A7E6FK29|A0A7E6FK29_OCTVU mucin-19-like OS=Octopus vulgaris OX=6645 GN=LOC115224399 PE=4 SV=1	937.447	937.985	3485	3494	PTTSTGTTTA	0.0412048	10
>tr|A0A7E6FK29|A0A7E6FK29_OCTVU mucin-19-like OS=Octopus vulgaris OX=6645 GN=LOC115224399 PE=4 SV=1	937.447	937.985	3790	3799	PTTSTGTTTA	0.0412048	10
>tr|A0A7E6FK29|A0A7E6FK29_OCTVU mucin-19-like OS=Octopus vulgaris OX=6645 GN=LOC115224399 PE=4 SV=1	939.388	940.025	1653	1660	GTTTMENW	0.159308	8
>tr|A0A7E6FK29|A0A7E6FK29_OCTVU mucin-19-like OS=Octopus vulgaris OX=6645 GN=LOC115224399 PE=4 SV=1	939.388	940.025	1796	1803	GTTTMENW	0.159308	8
>tr|A0A7E6FK29|A0A7E6FK29_OCTVU mucin-19-like OS=Octopus vulgaris OX=6645 GN=LOC115224399 PE=4 SV=1	939.388	940.025	1904	1911	GTTTMENW	0.159308	8
>tr|A0A7E6FK29|A0A7E6FK29_OCTVU mucin-19-like OS=Octopus vulgaris OX=6645 GN=LOC115224399 PE=4 SV=1	939.388	940.025	2217	2224	GTTTMENW	0.159308	8
>tr|A0A7E6FK29|A0A7E6FK29_OCTVU mucin-19-like OS=Octopus vulgaris OX=6645 GN=LOC115224399 PE=4 SV=1	939.388	940.025	2325	2332	GTTTMENW	0.159308	8
>tr|A0A7E6FK29|A0A7E6FK29_OCTVU mucin-19-like OS=Octopus vulgaris OX=6645 GN=LOC115224399 PE=4 SV=1	939.388	940.025	2637	2644	GTTTMENW	0.159308	8
>tr|A0A7E6FK29|A0A7E6FK29_OCTVU mucin-19-like OS=Octopus vulgaris OX=6645 GN=LOC115224399 PE=4 SV=1	939.388	940.025	2848	2855	GTTTMENW	0.159308	8
>tr|A0A7E6FK29|A0A7E6FK29_OCTVU mucin-19-like OS=Octopus vulgaris OX=6645 GN=LOC115224399 PE=4 SV=1	939.388	940.025	3191	3198	GTTTMENW	0.159308	8
>tr|A0A7E6FK29|A0A7E6FK29_OCTVU mucin-19-like OS=Octopus vulgaris OX=6645 GN=LOC115224399 PE=4 SV=1	939.388	940.025	3771	3778	GTTTMENW	0.159308	8
>tr|A0A7E6FK29|A0A7E6FK29_OCTVU mucin-19-like OS=Octopus vulgaris OX=6645 GN=LOC115224399 PE=4 SV=1	939.388	940.025	4190	4197	GTTTMENW	0.159308	8
>tr|A0A7E6FK29|A0A7E6FK29_OCTVU mucin-19-like OS=Octopus vulgaris OX=6645 GN=LOC115224399 PE=4 SV=1	939.388	940.025	4236	4243	GTTTMENW	0.159308	8
>tr|A0A7E6FK29|A0A7E6FK29_OCTVU mucin-19-like OS=Octopus vulgaris OX=6645 GN=LOC115224399 PE=4 SV=1	939.388	940.025	5202	5209	GTTTMENW	0.159308	8
>tr|A0A7E6FK29|A0A7E6FK29_OCTVU mucin-19-like OS=Octopus vulgaris OX=6645 GN=LOC115224399 PE=4 SV=1	944.441	945.094	604	610	NVKMHHY	0.155212	7
>tr|A0A7E6FK29|A0A7E6FK29_OCTVU mucin-19-like OS=Octopus vulgaris OX=6645 GN=LOC115224399 PE=4 SV=1	944.452	945.097	912	918	CRKNHTW	0.456032	7
>tr|A0A7E6FK29|A0A7E6FK29_OCTVU mucin-19-like OS=Octopus vulgaris OX=6645 GN=LOC115224399 PE=4 SV=1	949.547	950.133	638	645	VKKVTNNF	0.102708	8
>tr|A0A7E6FK29|A0A7E6FK29_OCTVU mucin-19-like OS=Octopus vulgaris OX=6645 GN=LOC115224399 PE=4 SV=1	950.447	951.027	1217	1224	PDTVVQEY	0.0706347	8
>tr|A0A7E6FK29|A0A7E6FK29_OCTVU mucin-19-like OS=Octopus vulgaris OX=6645 GN=LOC115224399 PE=4 SV=1	955.383	956.025	1653	1660	GTTTMENW	0.159308	8
>tr|A0A7E6FK29|A0A7E6FK29_OCTVU mucin-19-like OS=Octopus vulgaris OX=6645 GN=LOC115224399 PE=4 SV=1	955.383	956.025	1796	1803	GTTTMENW	0.159308	8
>tr|A0A7E6FK29|A0A7E6FK29_OCTVU mucin-19-like OS=Octopus vulgaris OX=6645 GN=LOC115224399 PE=4 SV=1	955.383	956.025	1904	1911	GTTTMENW	0.159308	8
>tr|A0A7E6FK29|A0A7E6FK29_OCTVU mucin-19-like OS=Octopus vulgaris OX=6645 GN=LOC115224399 PE=4 SV=1	955.383	956.025	2217	2224	GTTTMENW	0.159308	8
>tr|A0A7E6FK29|A0A7E6FK29_OCTVU mucin-19-like OS=Octopus vulgaris OX=6645 GN=LOC115224399 PE=4 SV=1	955.383	956.025	2325	2332	GTTTMENW	0.159308	8
>tr|A0A7E6FK29|A0A7E6FK29_OCTVU mucin-19-like OS=Octopus vulgaris OX=6645 GN=LOC115224399 PE=4 SV=1	955.383	956.025	2637	2644	GTTTMENW	0.159308	8
>tr|A0A7E6FK29|A0A7E6FK29_OCTVU mucin-19-like OS=Octopus vulgaris OX=6645 GN=LOC115224399 PE=4 SV=1	955.383	956.025	2848	2855	GTTTMENW	0.159308	8
>tr|A0A7E6FK29|A0A7E6FK29_OCTVU mucin-19-like OS=Octopus vulgaris OX=6645 GN=LOC115224399 PE=4 SV=1	955.383	956.025	3191	3198	GTTTMENW	0.159308	8
>tr|A0A7E6FK29|A0A7E6FK29_OCTVU mucin-19-like OS=Octopus vulgaris OX=6645 GN=LOC115224399 PE=4 SV=1	955.383	956.025	3771	3778	GTTTMENW	0.159308	8
>tr|A0A7E6FK29|A0A7E6FK29_OCTVU mucin-19-like OS=Octopus vulgaris OX=6645 GN=LOC115224399 PE=4 SV=1	955.383	956.025	4190	4197	GTTTMENW	0.159308	8
>tr|A0A7E6FK29|A0A7E6FK29_OCTVU mucin-19-like OS=Octopus vulgaris OX=6645 GN=LOC115224399 PE=4 SV=1	955.383	956.025	4236	4243	GTTTMENW	0.159308	8
>tr|A0A7E6FK29|A0A7E6FK29_OCTVU mucin-19-like OS=Octopus vulgaris OX=6645 GN=LOC115224399 PE=4 SV=1	955.383	956.025	5202	5209	GTTTMENW	0.159308	8
>tr|A0A7E6FK29|A0A7E6FK29_OCTVU mucin-19-like OS=Octopus vulgaris OX=6645 GN=LOC115224399 PE=4 SV=1	955.386	956.088	5632	5640	CSKTCDEGL	0.425755	9
>tr|A0A7E6FK29|A0A7E6FK29_OCTVU mucin-19-like OS=Octopus vulgaris OX=6645 GN=LOC115224399 PE=4 SV=1	964.495	965.054	4255	4264	PKTSTGTTTA	0.0524379	10
>tr|A0A7E6FK29|A0A7E6FK29_OCTVU mucin-19-like OS=Octopus vulgaris OX=6645 GN=LOC115224399 PE=4 SV=1	965.385	966.129	1325	1332	KPDDCVCW	0.874747	8
>tr|A0A7E6FK29|A0A7E6FK29_OCTVU mucin-19-like OS=Octopus vulgaris OX=6645 GN=LOC115224399 PE=4 SV=1	973.365	973.937	328	335	DHDPNNDF	0.569328	8
>tr|A0A7E6FK29|A0A7E6FK29_OCTVU mucin-19-like OS=Octopus vulgaris OX=6645 GN=LOC115224399 PE=4 SV=1	976.441	977.262	5984	5992	NPCCPVCKL	0.906944	9
>tr|A0A7E6FK29|A0A7E6FK29_OCTVU mucin-19-like OS=Octopus vulgaris OX=6645 GN=LOC115224399 PE=4 SV=1	980.381	981.098	848	857	SGCQCPDGTL	0.825775	10
>tr|A0A7E6FK29|A0A7E6FK29_OCTVU mucin-19-like OS=Octopus vulgaris OX=6645 GN=LOC115224399 PE=4 SV=1	996.448	997.009	4198	4208	STSPTTGSTSA	0.0644899	11
>tr|A0A7E6FK29|A0A7E6FK29_OCTVU mucin-19-like OS=Octopus vulgaris OX=6645 GN=LOC115224399 PE=4 SV=1	1004.47	1005.14	955	964	VTSPDGNCVL	0.263603	10
>tr|A0A7E6FK29|A0A7E6FK29_OCTVU mucin-19-like OS=Octopus vulgaris OX=6645 GN=LOC115224399 PE=4 SV=1	1010.37	1011.08	5722	5732	SNCSGSCQPGA	0.607889	11
>tr|A0A7E6FK29|A0A7E6FK29_OCTVU mucin-19-like OS=Octopus vulgaris OX=6645 GN=LOC115224399 PE=4 SV=1	1011.41	1012.09	1998	2005	ETTTMENW	0.096842	8
>tr|A0A7E6FK29|A0A7E6FK29_OCTVU mucin-19-like OS=Octopus vulgaris OX=6645 GN=LOC115224399 PE=4 SV=1	1013.39	1014.06	5895	5903	PNSSECETF	0.367238	9
>tr|A0A7E6FK29|A0A7E6FK29_OCTVU mucin-19-like OS=Octopus vulgaris OX=6645 GN=LOC115224399 PE=4 SV=1	1021.33	1022.13	6050	6058	HNNCECCQA	0.319418	9
>tr|A0A7E6FK29|A0A7E6FK29_OCTVU mucin-19-like OS=Octopus vulgaris OX=6645 GN=LOC115224399 PE=4 SV=1	1027.4	1028.09	1998	2005	ETTTMENW	0.096842	8
>tr|A0A7E6FK29|A0A7E6FK29_OCTVU mucin-19-like OS=Octopus vulgaris OX=6645 GN=LOC115224399 PE=4 SV=1	1032.37	1033.26	6085	6093	CSCECTKCR	0.721537	9
>tr|A0A7E6FK29|A0A7E6FK29_OCTVU mucin-19-like OS=Octopus vulgaris OX=6645 GN=LOC115224399 PE=4 SV=1	1034.6	1035.3	6061	6069	TKMRSVTVL	0.0694419	9
>tr|A0A7E6FK29|A0A7E6FK29_OCTVU mucin-19-like OS=Octopus vulgaris OX=6645 GN=LOC115224399 PE=4 SV=1	1035.39	1036.07	5970	5978	PECNSDEEL	0.159126	9
>tr|A0A7E6FK29|A0A7E6FK29_OCTVU mucin-19-like OS=Octopus vulgaris OX=6645 GN=LOC115224399 PE=4 SV=1	1036.42	1037.21	524	532	PCECVNSVW	0.493182	9
>tr|A0A7E6FK29|A0A7E6FK29_OCTVU mucin-19-like OS=Octopus vulgaris OX=6645 GN=LOC115224399 PE=4 SV=1	1036.48	1037.07	1661	1671	STSPTTPSTSA	0.0873555	11
>tr|A0A7E6FK29|A0A7E6FK29_OCTVU mucin-19-like OS=Octopus vulgaris OX=6645 GN=LOC115224399 PE=4 SV=1	1036.48	1037.07	1804	1814	STSPTTPSTSA	0.0873555	11
>tr|A0A7E6FK29|A0A7E6FK29_OCTVU mucin-19-like OS=Octopus vulgaris OX=6645 GN=LOC115224399 PE=4 SV=1	1036.48	1037.07	2006	2016	STSPTTPSTSA	0.0873555	11
>tr|A0A7E6FK29|A0A7E6FK29_OCTVU mucin-19-like OS=Octopus vulgaris OX=6645 GN=LOC115224399 PE=4 SV=1	1036.48	1037.07	2333	2343	STSPTTPSTSA	0.0873555	11
>tr|A0A7E6FK29|A0A7E6FK29_OCTVU mucin-19-like OS=Octopus vulgaris OX=6645 GN=LOC115224399 PE=4 SV=1	1036.48	1037.07	2645	2655	STSPTTPSTSA	0.0873555	11
>tr|A0A7E6FK29|A0A7E6FK29_OCTVU mucin-19-like OS=Octopus vulgaris OX=6645 GN=LOC115224399 PE=4 SV=1	1036.48	1037.07	2856	2866	STSPTTPSTSA	0.0873555	11
>tr|A0A7E6FK29|A0A7E6FK29_OCTVU mucin-19-like OS=Octopus vulgaris OX=6645 GN=LOC115224399 PE=4 SV=1	1036.48	1037.07	3199	3209	STSPTTPSTSA	0.0873555	11
>tr|A0A7E6FK29|A0A7E6FK29_OCTVU mucin-19-like OS=Octopus vulgaris OX=6645 GN=LOC115224399 PE=4 SV=1	1036.48	1037.07	3779	3789	STSPTTPSTSA	0.0873555	11
>tr|A0A7E6FK29|A0A7E6FK29_OCTVU mucin-19-like OS=Octopus vulgaris OX=6645 GN=LOC115224399 PE=4 SV=1	1036.48	1037.07	4244	4254	STSPTTPSTSA	0.0873555	11
>tr|A0A7E6FK29|A0A7E6FK29_OCTVU mucin-19-like OS=Octopus vulgaris OX=6645 GN=LOC115224399 PE=4 SV=1	1039.4	1040.17	946	954	EGCRCPPDY	0.583781	9
>tr|A0A7E6FK29|A0A7E6FK29_OCTVU mucin-19-like OS=Octopus vulgaris OX=6645 GN=LOC115224399 PE=4 SV=1	1048.4	1049.11	5461	5469	NPCESEPSW	0.380466	9
>tr|A0A7E6FK29|A0A7E6FK29_OCTVU mucin-19-like OS=Octopus vulgaris OX=6645 GN=LOC115224399 PE=4 SV=1	1050.6	1051.3	6061	6069	TKMRSVTVL	0.0694419	9
>tr|A0A7E6FK29|A0A7E6FK29_OCTVU mucin-19-like OS=Octopus vulgaris OX=6645 GN=LOC115224399 PE=4 SV=1	1072.4	1073.33	764	772	CMRDMCNSL	0.599519	9
>tr|A0A7E6FK29|A0A7E6FK29_OCTVU mucin-19-like OS=Octopus vulgaris OX=6645 GN=LOC115224399 PE=4 SV=1	1076.51	1077.14	1404	1414	PTETTPTGTTA	0.0536054	11
>tr|A0A7E6FK29|A0A7E6FK29_OCTVU mucin-19-like OS=Octopus vulgaris OX=6645 GN=LOC115224399 PE=4 SV=1	1077.52	1078.31	5666	5675	VRSCPSVCNI	0.366442	10
>tr|A0A7E6FK29|A0A7E6FK29_OCTVU mucin-19-like OS=Octopus vulgaris OX=6645 GN=LOC115224399 PE=4 SV=1	1083.44	1084.16	812	821	TCPEGTGQQY	0.104136	10
>tr|A0A7E6FK29|A0A7E6FK29_OCTVU mucin-19-like OS=Octopus vulgaris OX=6645 GN=LOC115224399 PE=4 SV=1	1087.47	1088.08	3076	3087	TSTSGTTSSTSA	0.0319188	12
>tr|A0A7E6FK29|A0A7E6FK29_OCTVU mucin-19-like OS=Octopus vulgaris OX=6645 GN=LOC115224399 PE=4 SV=1	1088.4	1089.33	764	772	CMRDMCNSL	0.599519	9
>tr|A0A7E6FK29|A0A7E6FK29_OCTVU mucin-19-like OS=Octopus vulgaris OX=6645 GN=LOC115224399 PE=4 SV=1	1092.57	1093.24	874	881	DKHHKKHY	0.143418	8
>tr|A0A7E6FK29|A0A7E6FK29_OCTVU mucin-19-like OS=Octopus vulgaris OX=6645 GN=LOC115224399 PE=4 SV=1	1096.48	1097.26	5828	5838	SECKGDCGKGI	0.624217	11
>tr|A0A7E6FK29|A0A7E6FK29_OCTVU mucin-19-like OS=Octopus vulgaris OX=6645 GN=LOC115224399 PE=4 SV=1	1101.39	1102.19	499	507	TEEQCPCEY	0.14786	9
>tr|A0A7E6FK29|A0A7E6FK29_OCTVU mucin-19-like OS=Octopus vulgaris OX=6645 GN=LOC115224399 PE=4 SV=1	1104.39	1105.33	764	772	CMRDMCNSL	0.599519	9
>tr|A0A7E6FK29|A0A7E6FK29_OCTVU mucin-19-like OS=Octopus vulgaris OX=6645 GN=LOC115224399 PE=4 SV=1	1108.55	1109.36	536	545	TKQCPKTCSL	0.288474	10
>tr|A0A7E6FK29|A0A7E6FK29_OCTVU mucin-19-like OS=Octopus vulgaris OX=6645 GN=LOC115224399 PE=4 SV=1	1109.34	1110.2	1347	1356	NDCHNCTCEA	0.3695	10
>tr|A0A7E6FK29|A0A7E6FK29_OCTVU mucin-19-like OS=Octopus vulgaris OX=6645 GN=LOC115224399 PE=4 SV=1	1109.5	1110.13	3229	3239	SETTQSTSPTA	0.0453776	11
>tr|A0A7E6FK29|A0A7E6FK29_OCTVU mucin-19-like OS=Octopus vulgaris OX=6645 GN=LOC115224399 PE=4 SV=1	1112.54	1113.29	1379	1388	NKTKVCDGTF	0.209678	10
>tr|A0A7E6FK29|A0A7E6FK29_OCTVU mucin-19-like OS=Octopus vulgaris OX=6645 GN=LOC115224399 PE=4 SV=1	1120.41	1121.24	5815	5824	QPCDVTCGEW	0.717199	10
>tr|A0A7E6FK29|A0A7E6FK29_OCTVU mucin-19-like OS=Octopus vulgaris OX=6645 GN=LOC115224399 PE=4 SV=1	1130.46	1131.28	5476	5486	STCTSTCGKGW	0.482508	11
>tr|A0A7E6FK29|A0A7E6FK29_OCTVU mucin-19-like OS=Octopus vulgaris OX=6645 GN=LOC115224399 PE=4 SV=1	1137.43	1138.27	5815	5824	QPCDVTCGEW	0.717199	10
>tr|A0A7E6FK29|A0A7E6FK29_OCTVU mucin-19-like OS=Octopus vulgaris OX=6645 GN=LOC115224399 PE=4 SV=1	1138.49	1139.23	902	911	ECNTTTEEVI	0.0419017	10
>tr|A0A7E6FK29|A0A7E6FK29_OCTVU mucin-19-like OS=Octopus vulgaris OX=6645 GN=LOC115224399 PE=4 SV=1	1142.43	1143.35	444	454	CPTDCPGGMVY	0.766499	11
>tr|A0A7E6FK29|A0A7E6FK29_OCTVU mucin-19-like OS=Octopus vulgaris OX=6645 GN=LOC115224399 PE=4 SV=1	1150.45	1151.27	923	932	TDCQETCHTL	0.20292	10
>tr|A0A7E6FK29|A0A7E6FK29_OCTVU mucin-19-like OS=Octopus vulgaris OX=6645 GN=LOC115224399 PE=4 SV=1	1158.43	1159.35	444	454	CPTDCPGGMVY	0.766499	11
>tr|A0A7E6FK29|A0A7E6FK29_OCTVU mucin-19-like OS=Octopus vulgaris OX=6645 GN=LOC115224399 PE=4 SV=1	1199.6	1200.41	1186	1195	CEVQPGRKPW	0.561036	10
>tr|A0A7E6FK29|A0A7E6FK29_OCTVU mucin-19-like OS=Octopus vulgaris OX=6645 GN=LOC115224399 PE=4 SV=1	1203.49	1204.27	5805	5814	TESEQQHCEI	0.0635067	10
>tr|A0A7E6FK29|A0A7E6FK29_OCTVU mucin-19-like OS=Octopus vulgaris OX=6645 GN=LOC115224399 PE=4 SV=1	1208.56	1209.26	5239	5250	VSETTQSTSPTA	0.0388621	12
>tr|A0A7E6FK29|A0A7E6FK29_OCTVU mucin-19-like OS=Octopus vulgaris OX=6645 GN=LOC115224399 PE=4 SV=1	1228.46	1229.34	72	82	VETSQTCCDGW	0.303452	11
>tr|A0A7E6FK29|A0A7E6FK29_OCTVU mucin-19-like OS=Octopus vulgaris OX=6645 GN=LOC115224399 PE=4 SV=1	1229.46	1230.39	5601	5611	CERCTCTDGEI	0.210812	11
>tr|A0A7E6FK29|A0A7E6FK29_OCTVU mucin-19-like OS=Octopus vulgaris OX=6645 GN=LOC115224399 PE=4 SV=1	1241.52	1242.32	998	1008	QQRNTPEDCPA	0.206729	11
>tr|A0A7E6FK29|A0A7E6FK29_OCTVU mucin-19-like OS=Octopus vulgaris OX=6645 GN=LOC115224399 PE=4 SV=1	1257.45	1258.4	5392	5403	TCNNCTCDDGVL	0.332871	12
>tr|A0A7E6FK29|A0A7E6FK29_OCTVU mucin-19-like OS=Octopus vulgaris OX=6645 GN=LOC115224399 PE=4 SV=1	1258.55	1259.35	998	1008	QQRNTPEDCPA	0.206729	11
>tr|A0A7E6FK29|A0A7E6FK29_OCTVU mucin-19-like OS=Octopus vulgaris OX=6645 GN=LOC115224399 PE=4 SV=1	1281.56	1282.31	363	373	HEVTTTQDSTY	0.0243799	11
>tr|A0A7E6FK29|A0A7E6FK29_OCTVU mucin-19-like OS=Octopus vulgaris OX=6645 GN=LOC115224399 PE=4 SV=1	1291.58	1292.48	5745	5757	PQCGGKECVGNSI	0.562567	13
>tr|A0A7E6FK29|A0A7E6FK29_OCTVU mucin-19-like OS=Octopus vulgaris OX=6645 GN=LOC115224399 PE=4 SV=1	1292.66	1293.42	3566	3578	TTPSTSVPTTSTI	0.0452606	13
>tr|A0A7E6FK29|A0A7E6FK29_OCTVU mucin-19-like OS=Octopus vulgaris OX=6645 GN=LOC115224399 PE=4 SV=1	1315.47	1316.44	5530	5541	SNCSNDCQQTCI	0.509509	12
>tr|A0A7E6FK29|A0A7E6FK29_OCTVU mucin-19-like OS=Octopus vulgaris OX=6645 GN=LOC115224399 PE=4 SV=1	1317.61	1318.46	257	269	STNGTHVMVDGSL	0.136515	13
>tr|A0A7E6FK29|A0A7E6FK29_OCTVU mucin-19-like OS=Octopus vulgaris OX=6645 GN=LOC115224399 PE=4 SV=1	1323.63	1324.39	1762	1775	TTPSTSVPTSSTSA	0.0415869	14
>tr|A0A7E6FK29|A0A7E6FK29_OCTVU mucin-19-like OS=Octopus vulgaris OX=6645 GN=LOC115224399 PE=4 SV=1	1323.63	1324.39	1870	1883	TTPSTSVPTSSTSA	0.0415869	14
>tr|A0A7E6FK29|A0A7E6FK29_OCTVU mucin-19-like OS=Octopus vulgaris OX=6645 GN=LOC115224399 PE=4 SV=1	1323.63	1324.39	2184	2197	TTPSTSVPTSSTSA	0.0415869	14
>tr|A0A7E6FK29|A0A7E6FK29_OCTVU mucin-19-like OS=Octopus vulgaris OX=6645 GN=LOC115224399 PE=4 SV=1	1323.63	1324.39	3969	3982	TTPSSSVPTTSTSA	0.0512235	14
>tr|A0A7E6FK29|A0A7E6FK29_OCTVU mucin-19-like OS=Octopus vulgaris OX=6645 GN=LOC115224399 PE=4 SV=1	1327.62	1328.38	5097	5110	TTSSTSVTTPSTSA	0.0292307	14
>tr|A0A7E6FK29|A0A7E6FK29_OCTVU mucin-19-like OS=Octopus vulgaris OX=6645 GN=LOC115224399 PE=4 SV=1	1331.56	1332.5	5867	5878	QKPCVCGENEEI	0.225941	12
>tr|A0A7E6FK29|A0A7E6FK29_OCTVU mucin-19-like OS=Octopus vulgaris OX=6645 GN=LOC115224399 PE=4 SV=1	1333.61	1334.46	257	269	STNGTHVMVDGSL	0.136515	13
>tr|A0A7E6FK29|A0A7E6FK29_OCTVU mucin-19-like OS=Octopus vulgaris OX=6645 GN=LOC115224399 PE=4 SV=1	1337.64	1338.42	4475	4488	TTPSTSVPTTSTSA	0.0367696	14
>tr|A0A7E6FK29|A0A7E6FK29_OCTVU mucin-19-like OS=Octopus vulgaris OX=6645 GN=LOC115224399 PE=4 SV=1	1337.64	1338.42	4698	4711	TTPSTSVPTTSTSA	0.0367696	14
>tr|A0A7E6FK29|A0A7E6FK29_OCTVU mucin-19-like OS=Octopus vulgaris OX=6645 GN=LOC115224399 PE=4 SV=1	1337.64	1338.42	5181	5194	TTPSTSVPTTSTSA	0.0367696	14
>tr|A0A7E6FK29|A0A7E6FK29_OCTVU mucin-19-like OS=Octopus vulgaris OX=6645 GN=LOC115224399 PE=4 SV=1	1338.66	1339.45	5256	5268	QTTTVTTTTTSTI	0.0183678	13
>tr|A0A7E6FK29|A0A7E6FK29_OCTVU mucin-19-like OS=Octopus vulgaris OX=6645 GN=LOC115224399 PE=4 SV=1	1339.47	1340.4	155	166	QDCCGERDTGSW	0.592684	12
>tr|A0A7E6FK29|A0A7E6FK29_OCTVU mucin-19-like OS=Octopus vulgaris OX=6645 GN=LOC115224399 PE=4 SV=1	1339.62	1340.39	5277	5290	PTTSTSSTTPSTTA	0.039336	14
>tr|A0A7E6FK29|A0A7E6FK29_OCTVU mucin-19-like OS=Octopus vulgaris OX=6645 GN=LOC115224399 PE=4 SV=1	1340.62	1341.38	3143	3156	PTTSTSGTTQSTTA	0.0294723	14
>tr|A0A7E6FK29|A0A7E6FK29_OCTVU mucin-19-like OS=Octopus vulgaris OX=6645 GN=LOC115224399 PE=4 SV=1	1343.62	1344.38	4018	4031	TTTSTSTTTPSTSA	0.0208943	14
>tr|A0A7E6FK29|A0A7E6FK29_OCTVU mucin-19-like OS=Octopus vulgaris OX=6645 GN=LOC115224399 PE=4 SV=1	1344.69	1345.54	5734	5744	RQRQRSCSNPL	0.28627	11
>tr|A0A7E6FK29|A0A7E6FK29_OCTVU mucin-19-like OS=Octopus vulgaris OX=6645 GN=LOC115224399 PE=4 SV=1	1348.59	1349.53	5867	5878	QKPCVCGENEEI	0.225941	12
>tr|A0A7E6FK29|A0A7E6FK29_OCTVU mucin-19-like OS=Octopus vulgaris OX=6645 GN=LOC115224399 PE=4 SV=1	1354.63	1355.41	1619	1632	TTPSTSVQTSSTSA	0.0303923	14
>tr|A0A7E6FK29|A0A7E6FK29_OCTVU mucin-19-like OS=Octopus vulgaris OX=6645 GN=LOC115224399 PE=4 SV=1	1354.63	1355.41	2603	2616	TTPSTSVQTSSTSA	0.0303923	14
>tr|A0A7E6FK29|A0A7E6FK29_OCTVU mucin-19-like OS=Octopus vulgaris OX=6645 GN=LOC115224399 PE=4 SV=1	1355.69	1356.48	5256	5268	QTTTVTTTTTSTI	0.0183678	13
>tr|A0A7E6FK29|A0A7E6FK29_OCTVU mucin-19-like OS=Octopus vulgaris OX=6645 GN=LOC115224399 PE=4 SV=1	1356.49	1357.43	155	166	QDCCGERDTGSW	0.592684	12
>tr|A0A7E6FK29|A0A7E6FK29_OCTVU mucin-19-like OS=Octopus vulgaris OX=6645 GN=LOC115224399 PE=4 SV=1	1358.63	1359.58	5958	5969	GGHVECQRKCEI	0.393323	12
>tr|A0A7E6FK29|A0A7E6FK29_OCTVU mucin-19-like OS=Octopus vulgaris OX=6645 GN=LOC115224399 PE=4 SV=1	1362.67	1363.47	3300	3313	TSPSTSKPTTPTSA	0.0752015	14
>tr|A0A7E6FK29|A0A7E6FK29_OCTVU mucin-19-like OS=Octopus vulgaris OX=6645 GN=LOC115224399 PE=4 SV=1	1369.65	1370.6	6016	6028	QKVRVTQCGGHCA	0.209307	13
>tr|A0A7E6FK29|A0A7E6FK29_OCTVU mucin-19-like OS=Octopus vulgaris OX=6645 GN=LOC115224399 PE=4 SV=1	1371.52	1372.38	1141	1152	CGNRDQDSTNDF	0.270642	12
>tr|A0A7E6FK29|A0A7E6FK29_OCTVU mucin-19-like OS=Octopus vulgaris OX=6645 GN=LOC115224399 PE=4 SV=1	1383.65	1384.45	3832	3845	QTTTVTTTTTSTSA	0.0181347	14
>tr|A0A7E6FK29|A0A7E6FK29_OCTVU mucin-19-like OS=Octopus vulgaris OX=6645 GN=LOC115224399 PE=4 SV=1	1386.67	1387.64	6016	6028	QKVRVTQCGGHCA	0.209307	13
>tr|A0A7E6FK29|A0A7E6FK29_OCTVU mucin-19-like OS=Octopus vulgaris OX=6645 GN=LOC115224399 PE=4 SV=1	1400.68	1401.48	3832	3845	QTTTVTTTTTSTSA	0.0181347	14
>tr|A0A7E6FK29|A0A7E6FK29_OCTVU mucin-19-like OS=Octopus vulgaris OX=6645 GN=LOC115224399 PE=4 SV=1	1407.65	1408.47	1815	1828	QTTTVTETTPSTSA	0.021364	14
>tr|A0A7E6FK29|A0A7E6FK29_OCTVU mucin-19-like OS=Octopus vulgaris OX=6645 GN=LOC115224399 PE=4 SV=1	1407.65	1408.47	1958	1971	QTTTVTETTPSTSA	0.021364	14
>tr|A0A7E6FK29|A0A7E6FK29_OCTVU mucin-19-like OS=Octopus vulgaris OX=6645 GN=LOC115224399 PE=4 SV=1	1407.65	1408.47	2052	2065	QTTTVTETTPSTSA	0.021364	14
>tr|A0A7E6FK29|A0A7E6FK29_OCTVU mucin-19-like OS=Octopus vulgaris OX=6645 GN=LOC115224399 PE=4 SV=1	1407.65	1408.47	2285	2298	QTTTVTETTPSTSA	0.021364	14
>tr|A0A7E6FK29|A0A7E6FK29_OCTVU mucin-19-like OS=Octopus vulgaris OX=6645 GN=LOC115224399 PE=4 SV=1	1407.65	1408.47	2379	2392	QTTTVTETTPSTSA	0.021364	14
>tr|A0A7E6FK29|A0A7E6FK29_OCTVU mucin-19-like OS=Octopus vulgaris OX=6645 GN=LOC115224399 PE=4 SV=1	1407.65	1408.47	2767	2780	QTTTVTETTPSTSA	0.021364	14
>tr|A0A7E6FK29|A0A7E6FK29_OCTVU mucin-19-like OS=Octopus vulgaris OX=6645 GN=LOC115224399 PE=4 SV=1	1407.65	1408.47	2902	2915	QTTTVTETTPSTSA	0.021364	14
>tr|A0A7E6FK29|A0A7E6FK29_OCTVU mucin-19-like OS=Octopus vulgaris OX=6645 GN=LOC115224399 PE=4 SV=1	1424.68	1425.5	1815	1828	QTTTVTETTPSTSA	0.021364	14
>tr|A0A7E6FK29|A0A7E6FK29_OCTVU mucin-19-like OS=Octopus vulgaris OX=6645 GN=LOC115224399 PE=4 SV=1	1424.68	1425.5	1958	1971	QTTTVTETTPSTSA	0.021364	14
>tr|A0A7E6FK29|A0A7E6FK29_OCTVU mucin-19-like OS=Octopus vulgaris OX=6645 GN=LOC115224399 PE=4 SV=1	1424.68	1425.5	2052	2065	QTTTVTETTPSTSA	0.021364	14
>tr|A0A7E6FK29|A0A7E6FK29_OCTVU mucin-19-like OS=Octopus vulgaris OX=6645 GN=LOC115224399 PE=4 SV=1	1424.68	1425.5	2285	2298	QTTTVTETTPSTSA	0.021364	14
>tr|A0A7E6FK29|A0A7E6FK29_OCTVU mucin-19-like OS=Octopus vulgaris OX=6645 GN=LOC115224399 PE=4 SV=1	1424.68	1425.5	2379	2392	QTTTVTETTPSTSA	0.021364	14
>tr|A0A7E6FK29|A0A7E6FK29_OCTVU mucin-19-like OS=Octopus vulgaris OX=6645 GN=LOC115224399 PE=4 SV=1	1424.68	1425.5	2767	2780	QTTTVTETTPSTSA	0.021364	14
>tr|A0A7E6FK29|A0A7E6FK29_OCTVU mucin-19-like OS=Octopus vulgaris OX=6645 GN=LOC115224399 PE=4 SV=1	1424.68	1425.5	2902	2915	QTTTVTETTPSTSA	0.021364	14
>tr|A0A7E6FK29|A0A7E6FK29_OCTVU mucin-19-like OS=Octopus vulgaris OX=6645 GN=LOC115224399 PE=4 SV=1	1428.55	1429.36	5364	5376	DEDNPGSSHENDI	0.140738	13
>tr|A0A7E6FK29|A0A7E6FK29_OCTVU mucin-19-like OS=Octopus vulgaris OX=6645 GN=LOC115224399 PE=4 SV=1	1431.66	1432.56	30	42	CNVTEHSTVTRNA	0.0730768	13
>tr|A0A7E6FK29|A0A7E6FK29_OCTVU mucin-19-like OS=Octopus vulgaris OX=6645 GN=LOC115224399 PE=4 SV=1	1448.69	1449.7	5516	5528	KNCTVEECPQGKI	0.289206	13
>tr|A0A7E6FK29|A0A7E6FK29_OCTVU mucin-19-like OS=Octopus vulgaris OX=6645 GN=LOC115224399 PE=4 SV=1	1452.73	1453.67	5993	6004	RSENKCQVKVDF	0.16027	12
>tr|A0A7E6FK29|A0A7E6FK29_OCTVU mucin-19-like OS=Octopus vulgaris OX=6645 GN=LOC115224399 PE=4 SV=1	1475.66	1476.61	715	727	EQVEETDVDPCVI	0.0890703	13
>tr|A0A7E6FK29|A0A7E6FK29_OCTVU mucin-19-like OS=Octopus vulgaris OX=6645 GN=LOC115224399 PE=4 SV=1	1494.72	1495.6	1154	1166	TRSNSNEKVPSEF	0.0842603	13
>tr|A0A7E6FK29|A0A7E6FK29_OCTVU mucin-19-like OS=Octopus vulgaris OX=6645 GN=LOC115224399 PE=4 SV=1	1497.74	1498.6	2622	2636	STPTSTRVTTTSTSA	0.0349605	15
>tr|A0A7E6FK29|A0A7E6FK29_OCTVU mucin-19-like OS=Octopus vulgaris OX=6645 GN=LOC115224399 PE=4 SV=1	1499.68	1500.74	6037	6049	MSTKPDVVTDEMF	0.189895	13
>tr|A0A7E6FK29|A0A7E6FK29_OCTVU mucin-19-like OS=Octopus vulgaris OX=6645 GN=LOC115224399 PE=4 SV=1	1515.67	1516.74	6037	6049	MSTKPDVVTDEMF	0.189895	13
>tr|A0A7E6FK29|A0A7E6FK29_OCTVU mucin-19-like OS=Octopus vulgaris OX=6645 GN=LOC115224399 PE=4 SV=1	1531.67	1532.74	6037	6049	MSTKPDVVTDEMF	0.189895	13
>tr|A0A7E6FK29|A0A7E6FK29_OCTVU mucin-19-like OS=Octopus vulgaris OX=6645 GN=LOC115224399 PE=4 SV=1	1573.79	1574.88	5437	5450	RTMHKGKGTEVCNL	0.13217	14
>tr|A0A7E6FK29|A0A7E6FK29_OCTVU mucin-19-like OS=Octopus vulgaris OX=6645 GN=LOC115224399 PE=4 SV=1	1584.62	1585.61	5846	5859	SDDQQNNPQCSVSY	0.234897	14
>tr|A0A7E6FK29|A0A7E6FK29_OCTVU mucin-19-like OS=Octopus vulgaris OX=6645 GN=LOC115224399 PE=4 SV=1	1589.79	1590.88	5437	5450	RTMHKGKGTEVCNL	0.13217	14
>tr|A0A7E6FK29|A0A7E6FK29_OCTVU mucin-19-like OS=Octopus vulgaris OX=6645 GN=LOC115224399 PE=4 SV=1	1594.82	1595.75	3283	3298	SSTTKSSTSVTTPPTI	0.057808	16
>tr|A0A7E6FK29|A0A7E6FK29_OCTVU mucin-19-like OS=Octopus vulgaris OX=6645 GN=LOC115224399 PE=4 SV=1	1609.78	1610.72	5291	5306	QTTTVTSTPSTSTTTL	0.0304661	16
>tr|A0A7E6FK29|A0A7E6FK29_OCTVU mucin-19-like OS=Octopus vulgaris OX=6645 GN=LOC115224399 PE=4 SV=1	1626.81	1627.75	5291	5306	QTTTVTSTPSTSTTTL	0.0304661	16
>tr|A0A7E6FK29|A0A7E6FK29_OCTVU mucin-19-like OS=Octopus vulgaris OX=6645 GN=LOC115224399 PE=4 SV=1	1660.74	1661.86	5422	5436	STCTKVCDNGQTTRF	0.323874	15
>tr|A0A7E6FK29|A0A7E6FK29_OCTVU mucin-19-like OS=Octopus vulgaris OX=6645 GN=LOC115224399 PE=4 SV=1	1698.84	1699.82	1479	1495	GTSEGTQVTTKTTSSTI	0.0344482	17
>tr|A0A7E6FK29|A0A7E6FK29_OCTVU mucin-19-like OS=Octopus vulgaris OX=6645 GN=LOC115224399 PE=4 SV=1	1766.79	1767.81	3814	3831	STSPPTTSTSPTEQSTSA	0.0407894	18
>tr|A0A7E6FK29|A0A7E6FK29_OCTVU mucin-19-like OS=Octopus vulgaris OX=6645 GN=LOC115224399 PE=4 SV=1	1981.91	1983.06	1707	1726	QTTTVTETTPSTSTPTSTSA	0.0207447	20
>tr|A0A7E6FK29|A0A7E6FK29_OCTVU mucin-19-like OS=Octopus vulgaris OX=6645 GN=LOC115224399 PE=4 SV=1	1981.91	1983.06	2691	2710	QTTTVTETTPSTSTPTSTSA	0.0207447	20
>tr|A0A7E6FK29|A0A7E6FK29_OCTVU mucin-19-like OS=Octopus vulgaris OX=6645 GN=LOC115224399 PE=4 SV=1	1995.86	1997.14	5778	5796	SSCDQSCGPGNQTRERTGL	0.669928	19
>tr|A0A7E6FK29|A0A7E6FK29_OCTVU mucin-19-like OS=Octopus vulgaris OX=6645 GN=LOC115224399 PE=4 SV=1	1998.93	2000.09	1707	1726	QTTTVTETTPSTSTPTSTSA	0.0207447	20
>tr|A0A7E6FK29|A0A7E6FK29_OCTVU mucin-19-like OS=Octopus vulgaris OX=6645 GN=LOC115224399 PE=4 SV=1	1998.93	2000.09	2691	2710	QTTTVTETTPSTSTPTSTSA	0.0207447	20
>tr|A0A7E6FK29|A0A7E6FK29_OCTVU mucin-19-like OS=Octopus vulgaris OX=6645 GN=LOC115224399 PE=4 SV=1	2022.05	2023.26	1443	1462	PTGEPSNKPNTKVTVSPPTA	0.158441	20
>tr|A0A7E6FK29|A0A7E6FK29_OCTVU mucin-19-like OS=Octopus vulgaris OX=6645 GN=LOC115224399 PE=4 SV=1	2052.98	2054.18	2801	2821	TSPSTSVPTTTVTETTPSTSA	0.0328582	21
>tr|A0A7E6FK29|A0A7E6FK29_OCTVU mucin-19-like OS=Octopus vulgaris OX=6645 GN=LOC115224399 PE=4 SV=1	2129.97	2131.37	1281	1299	KECGSSNPPTCRDKQETHL	0.310222	19
>tr|A0A7E6FK29|A0A7E6FK29_OCTVU mucin-19-like OS=Octopus vulgaris OX=6645 GN=LOC115224399 PE=4 SV=1	2205.92	2207.61	96	114	CKNEGTCVQPNKCQCMEKY	0.638711	19
>tr|A0A7E6FK29|A0A7E6FK29_OCTVU mucin-19-like OS=Octopus vulgaris OX=6645 GN=LOC115224399 PE=4 SV=1	2221.92	2223.61	96	114	CKNEGTCVQPNKCQCMEKY	0.638711	19
>tr|A0A7E6FK29|A0A7E6FK29_OCTVU mucin-19-like OS=Octopus vulgaris OX=6645 GN=LOC115224399 PE=4 SV=1	2243.04	2244.51	1507	1528	PMTSTSVTTPSTTPQMTTTTTA	0.0119324	22
>tr|A0A7E6FK29|A0A7E6FK29_OCTVU mucin-19-like OS=Octopus vulgaris OX=6645 GN=LOC115224399 PE=4 SV=1	2259.04	2260.51	1507	1528	PMTSTSVTTPSTTPQMTTTTTA	0.0119324	22
>tr|A0A7E6FK29|A0A7E6FK29_OCTVU mucin-19-like OS=Octopus vulgaris OX=6645 GN=LOC115224399 PE=4 SV=1	2275.03	2276.51	1507	1528	PMTSTSVTTPSTTPQMTTTTTA	0.0119324	22
>tr|A0A7E6FK29|A0A7E6FK29_OCTVU mucin-19-like OS=Octopus vulgaris OX=6645 GN=LOC115224399 PE=4 SV=1	2378.17	2379.7	5487	5508	QVRRRSCTNGVTESTKCDGKGL	0.207866	22
>tr|A0A7E6FK29|A0A7E6FK29_OCTVU mucin-19-like OS=Octopus vulgaris OX=6645 GN=LOC115224399 PE=4 SV=1	2395.19	2396.73	5487	5508	QVRRRSCTNGVTESTKCDGKGL	0.207866	22
>tr|A0A6P7T042|A0A6P7T042_OCTVU LOW QUALITY PROTEIN: paramyosin-like OS=Octopus vulgaris OX=6645 GN=LOC115218392 PE=4 SV=1	802.405	802.867	433	439	GERVDNL	0.14532	7
>tr|A0A6P7T042|A0A6P7T042_OCTVU LOW QUALITY PROTEIN: paramyosin-like OS=Octopus vulgaris OX=6645 GN=LOC115218392 PE=4 SV=1	812.39	812.862	604	609	EEEHRI	0.0609379	6
>tr|A0A6P7T042|A0A6P7T042_OCTVU LOW QUALITY PROTEIN: paramyosin-like OS=Octopus vulgaris OX=6645 GN=LOC115218392 PE=4 SV=1	817.482	818.038	331	336	KRRMNL	0.43683	6
>tr|A0A6P7T042|A0A6P7T042_OCTVU LOW QUALITY PROTEIN: paramyosin-like OS=Octopus vulgaris OX=6645 GN=LOC115218392 PE=4 SV=1	830.473	830.965	398	404	GKRVEEL	0.0631432	7
>tr|A0A6P7T042|A0A6P7T042_OCTVU LOW QUALITY PROTEIN: paramyosin-like OS=Octopus vulgaris OX=6645 GN=LOC115218392 PE=4 SV=1	833.477	834.037	331	336	KRRMNL	0.43683	6
>tr|A0A6P7T042|A0A6P7T042_OCTVU LOW QUALITY PROTEIN: paramyosin-like OS=Octopus vulgaris OX=6645 GN=LOC115218392 PE=4 SV=1	843.432	843.92	653	659	HETTSRL	0.0944676	7
>tr|A0A6P7T042|A0A6P7T042_OCTVU LOW QUALITY PROTEIN: paramyosin-like OS=Octopus vulgaris OX=6645 GN=LOC115218392 PE=4 SV=1	847.452	847.949	159	165	DKEKSQL	0.0710998	7
>tr|A0A6P7T042|A0A6P7T042_OCTVU LOW QUALITY PROTEIN: paramyosin-like OS=Octopus vulgaris OX=6645 GN=LOC115218392 PE=4 SV=1	849.395	849.878	486	492	RDTEESL	0.0499942	7
>tr|A0A6P7T042|A0A6P7T042_OCTVU LOW QUALITY PROTEIN: paramyosin-like OS=Octopus vulgaris OX=6645 GN=LOC115218392 PE=4 SV=1	860.47	860.954	642	648	ERSRKNA	0.0676784	7
>tr|A0A6P7T042|A0A6P7T042_OCTVU LOW QUALITY PROTEIN: paramyosin-like OS=Octopus vulgaris OX=6645 GN=LOC115218392 PE=4 SV=1	864.421	864.939	229	235	QHQVQEL	0.115931	7
>tr|A0A6P7T042|A0A6P7T042_OCTVU LOW QUALITY PROTEIN: paramyosin-like OS=Octopus vulgaris OX=6645 GN=LOC115218392 PE=4 SV=1	878.433	878.923	529	536	ESNRKSSA	0.0608178	8
>tr|A0A6P7T042|A0A6P7T042_OCTVU LOW QUALITY PROTEIN: paramyosin-like OS=Octopus vulgaris OX=6645 GN=LOC115218392 PE=4 SV=1	881.448	881.97	229	235	QHQVQEL	0.115931	7
>tr|A0A6P7T042|A0A6P7T042_OCTVU LOW QUALITY PROTEIN: paramyosin-like OS=Octopus vulgaris OX=6645 GN=LOC115218392 PE=4 SV=1	887.506	888.02	346	352	EQSRVRI	0.0993298	7
>tr|A0A6P7T042|A0A6P7T042_OCTVU LOW QUALITY PROTEIN: paramyosin-like OS=Octopus vulgaris OX=6645 GN=LOC115218392 PE=4 SV=1	887.542	888.064	152	158	TKQKNRI	0.0623334	7
>tr|A0A6P7T042|A0A6P7T042_OCTVU LOW QUALITY PROTEIN: paramyosin-like OS=Octopus vulgaris OX=6645 GN=LOC115218392 PE=4 SV=1	887.542	888.064	384	390	TKKNRQL	0.073155	7
>tr|A0A6P7T042|A0A6P7T042_OCTVU LOW QUALITY PROTEIN: paramyosin-like OS=Octopus vulgaris OX=6645 GN=LOC115218392 PE=4 SV=1	888.49	889.005	440	446	TRENKQL	0.0682502	7
>tr|A0A6P7T042|A0A6P7T042_OCTVU LOW QUALITY PROTEIN: paramyosin-like OS=Octopus vulgaris OX=6645 GN=LOC115218392 PE=4 SV=1	895.452	895.994	547	553	VEVETRY	0.0509066	7
>tr|A0A6P7T042|A0A6P7T042_OCTVU LOW QUALITY PROTEIN: paramyosin-like OS=Octopus vulgaris OX=6645 GN=LOC115218392 PE=4 SV=1	902.469	902.988	801	807	EDDRRVI	0.108586	7
>tr|A0A6P7T042|A0A6P7T042_OCTVU LOW QUALITY PROTEIN: paramyosin-like OS=Octopus vulgaris OX=6645 GN=LOC115218392 PE=4 SV=1	902.517	903.035	670	676	TNDKRRL	0.236033	7
>tr|A0A6P7T042|A0A6P7T042_OCTVU LOW QUALITY PROTEIN: paramyosin-like OS=Octopus vulgaris OX=6645 GN=LOC115218392 PE=4 SV=1	925.449	925.982	419	425	EQENHRL	0.166203	7
>tr|A0A6P7T042|A0A6P7T042_OCTVU LOW QUALITY PROTEIN: paramyosin-like OS=Octopus vulgaris OX=6645 GN=LOC115218392 PE=4 SV=1	938.421	938.975	716	722	KQEQENY	0.0553215	7
>tr|A0A6P7T042|A0A6P7T042_OCTVU LOW QUALITY PROTEIN: paramyosin-like OS=Octopus vulgaris OX=6645 GN=LOC115218392 PE=4 SV=1	962.553	963.134	787	793	RKVERQF	0.118182	7
>tr|A0A6P7T042|A0A6P7T042_OCTVU LOW QUALITY PROTEIN: paramyosin-like OS=Octopus vulgaris OX=6645 GN=LOC115218392 PE=4 SV=1	974.563	975.14	106	113	RKKDSEVI	0.0516593	8
>tr|A0A6P7T042|A0A6P7T042_OCTVU LOW QUALITY PROTEIN: paramyosin-like OS=Octopus vulgaris OX=6645 GN=LOC115218392 PE=4 SV=1	974.574	975.143	618	625	SVSERKRI	0.156556	8
>tr|A0A6P7T042|A0A6P7T042_OCTVU LOW QUALITY PROTEIN: paramyosin-like OS=Octopus vulgaris OX=6645 GN=LOC115218392 PE=4 SV=1	977.465	978.012	64	71	DSERDSRI	0.171256	8
>tr|A0A6P7T042|A0A6P7T042_OCTVU LOW QUALITY PROTEIN: paramyosin-like OS=Octopus vulgaris OX=6645 GN=LOC115218392 PE=4 SV=1	1057.56	1058.26	751	759	QREGKRMVA	0.135184	9
>tr|A0A6P7T042|A0A6P7T042_OCTVU LOW QUALITY PROTEIN: paramyosin-like OS=Octopus vulgaris OX=6645 GN=LOC115218392 PE=4 SV=1	1067.61	1068.23	134	141	RKRHQETI	0.0548675	8
>tr|A0A6P7T042|A0A6P7T042_OCTVU LOW QUALITY PROTEIN: paramyosin-like OS=Octopus vulgaris OX=6645 GN=LOC115218392 PE=4 SV=1	1073.55	1074.25	751	759	QREGKRMVA	0.135184	9
>tr|A0A6P7T042|A0A6P7T042_OCTVU LOW QUALITY PROTEIN: paramyosin-like OS=Octopus vulgaris OX=6645 GN=LOC115218392 PE=4 SV=1	1074.58	1075.29	751	759	QREGKRMVA	0.135184	9
>tr|A0A6P7T042|A0A6P7T042_OCTVU LOW QUALITY PROTEIN: paramyosin-like OS=Octopus vulgaris OX=6645 GN=LOC115218392 PE=4 SV=1	1090.58	1091.29	751	759	QREGKRMVA	0.135184	9
>tr|A0A6P7T042|A0A6P7T042_OCTVU LOW QUALITY PROTEIN: paramyosin-like OS=Octopus vulgaris OX=6645 GN=LOC115218392 PE=4 SV=1	1136.5	1137.15	289	298	EEESESNTVL	0.0655392	10
>tr|A0A6P7T042|A0A6P7T042_OCTVU LOW QUALITY PROTEIN: paramyosin-like OS=Octopus vulgaris OX=6645 GN=LOC115218392 PE=4 SV=1	1159.52	1160.19	124	133	TQHESTEQSL	0.045821	10
>tr|A0A6P7T042|A0A6P7T042_OCTVU LOW QUALITY PROTEIN: paramyosin-like OS=Octopus vulgaris OX=6645 GN=LOC115218392 PE=4 SV=1	1219.57	1220.25	261	270	DDESRQRSNL	0.142482	10
>tr|A0A6P7T042|A0A6P7T042_OCTVU LOW QUALITY PROTEIN: paramyosin-like OS=Octopus vulgaris OX=6645 GN=LOC115218392 PE=4 SV=1	1259.65	1260.36	773	782	EVEQRRSREA	0.048979	10
>tr|A0A6P7T042|A0A6P7T042_OCTVU LOW QUALITY PROTEIN: paramyosin-like OS=Octopus vulgaris OX=6645 GN=LOC115218392 PE=4 SV=1	1446.73	1447.56	20	32	RGQSPTSQSRTEI	0.101319	13
>tr|A0A6P7T042|A0A6P7T042_OCTVU LOW QUALITY PROTEIN: paramyosin-like OS=Octopus vulgaris OX=6645 GN=LOC115218392 PE=4 SV=1	1562.85	1563.83	866	878	VRRSRSMSVSREI	0.0749648	13
>tr|A0A6P7T042|A0A6P7T042_OCTVU LOW QUALITY PROTEIN: paramyosin-like OS=Octopus vulgaris OX=6645 GN=LOC115218392 PE=4 SV=1	1578.85	1579.83	866	878	VRRSRSMSVSREI	0.0749648	13
>tr|A0A6P7T042|A0A6P7T042_OCTVU LOW QUALITY PROTEIN: paramyosin-like OS=Octopus vulgaris OX=6645 GN=LOC115218392 PE=4 SV=1	1639.95	1640.94	515	528	TDRPSVRNXKXDXI	0.475073	14
>tr|A0A7E6FE51|A0A7E6FE51_OCTVU filamin-A isoform X1 OS=Octopus vulgaris OX=6645 GN=LOC115220251 PE=3 SV=1	801.447	801.923	374	381	GDPSKVKA	0.238035	8
>tr|A0A7E6FE51|A0A7E6FE51_OCTVU filamin-A isoform X1 OS=Octopus vulgaris OX=6645 GN=LOC115220251 PE=3 SV=1	802.405	802.867	1905	1912	GGEPSSRI	0.267903	8
>tr|A0A7E6FE51|A0A7E6FE51_OCTVU filamin-A isoform X1 OS=Octopus vulgaris OX=6645 GN=LOC115220251 PE=3 SV=1	803.368	803.855	1370	1376	QRPDGTF	0.697201	7
>tr|A0A7E6FE51|A0A7E6FE51_OCTVU filamin-A isoform X1 OS=Octopus vulgaris OX=6645 GN=LOC115220251 PE=3 SV=1	803.499	803.983	52	58	KTVSKQL	0.0530058	7
>tr|A0A7E6FE51|A0A7E6FE51_OCTVU filamin-A isoform X1 OS=Octopus vulgaris OX=6645 GN=LOC115220251 PE=3 SV=1	805.43	805.909	1744	1750	KVTETDI	0.0290816	7
>tr|A0A7E6FE51|A0A7E6FE51_OCTVU filamin-A isoform X1 OS=Octopus vulgaris OX=6645 GN=LOC115220251 PE=3 SV=1	807.399	807.887	2170	2176	PSRVGEY	0.20555	7
>tr|A0A7E6FE51|A0A7E6FE51_OCTVU filamin-A isoform X1 OS=Octopus vulgaris OX=6645 GN=LOC115220251 PE=3 SV=1	819.436	819.941	1157	1163	TNKPNVF	0.309626	7
>tr|A0A7E6FE51|A0A7E6FE51_OCTVU filamin-A isoform X1 OS=Octopus vulgaris OX=6645 GN=LOC115220251 PE=3 SV=1	820.395	820.885	1370	1376	QRPDGTF	0.697201	7
>tr|A0A7E6FE51|A0A7E6FE51_OCTVU filamin-A isoform X1 OS=Octopus vulgaris OX=6645 GN=LOC115220251 PE=3 SV=1	823.383	823.883	2403	2409	VQEVGEY	0.0563527	7
>tr|A0A7E6FE51|A0A7E6FE51_OCTVU filamin-A isoform X1 OS=Octopus vulgaris OX=6645 GN=LOC115220251 PE=3 SV=1	825.41	825.902	1339	1347	GPGVNDVPA	0.296367	9
>tr|A0A7E6FE51|A0A7E6FE51_OCTVU filamin-A isoform X1 OS=Octopus vulgaris OX=6645 GN=LOC115220251 PE=3 SV=1	826.464	826.939	275	281	NPNRVRA	0.246669	7
>tr|A0A7E6FE51|A0A7E6FE51_OCTVU filamin-A isoform X1 OS=Octopus vulgaris OX=6645 GN=LOC115220251 PE=3 SV=1	826.467	826.974	406	414	GEGPVGVVI	0.157321	9
>tr|A0A7E6FE51|A0A7E6FE51_OCTVU filamin-A isoform X1 OS=Octopus vulgaris OX=6645 GN=LOC115220251 PE=3 SV=1	830.473	830.965	98	104	ENVTRVL	0.0781741	7
>tr|A0A7E6FE51|A0A7E6FE51_OCTVU filamin-A isoform X1 OS=Octopus vulgaris OX=6645 GN=LOC115220251 PE=3 SV=1	845.419	845.999	241	247	EMNNPKI	0.240867	7
>tr|A0A7E6FE51|A0A7E6FE51_OCTVU filamin-A isoform X1 OS=Octopus vulgaris OX=6645 GN=LOC115220251 PE=3 SV=1	846.493	847.005	1527	1533	ETKEKVL	0.0385276	7
>tr|A0A7E6FE51|A0A7E6FE51_OCTVU filamin-A isoform X1 OS=Octopus vulgaris OX=6645 GN=LOC115220251 PE=3 SV=1	851.342	851.85	1478	1484	ENPDETF	0.280956	7
>tr|A0A7E6FE51|A0A7E6FE51_OCTVU filamin-A isoform X1 OS=Octopus vulgaris OX=6645 GN=LOC115220251 PE=3 SV=1	853.435	854.025	581	589	HGGMVGKPA	0.268127	9
>tr|A0A7E6FE51|A0A7E6FE51_OCTVU filamin-A isoform X1 OS=Octopus vulgaris OX=6645 GN=LOC115220251 PE=3 SV=1	857.52	858.035	856	863	GKVRVEGL	0.117899	8
>tr|A0A7E6FE51|A0A7E6FE51_OCTVU filamin-A isoform X1 OS=Octopus vulgaris OX=6645 GN=LOC115220251 PE=3 SV=1	859.325	859.895	641	647	HCNEEDI	0.0988776	7
>tr|A0A7E6FE51|A0A7E6FE51_OCTVU filamin-A isoform X1 OS=Octopus vulgaris OX=6645 GN=LOC115220251 PE=3 SV=1	861.413	861.998	241	247	EMNNPKI	0.240867	7
>tr|A0A7E6FE51|A0A7E6FE51_OCTVU filamin-A isoform X1 OS=Octopus vulgaris OX=6645 GN=LOC115220251 PE=3 SV=1	862.333	862.836	1382	1389	HDNGDGTF	0.53821	8
>tr|A0A7E6FE51|A0A7E6FE51_OCTVU filamin-A isoform X1 OS=Octopus vulgaris OX=6645 GN=LOC115220251 PE=3 SV=1	869.43	870.024	581	589	HGGMVGKPA	0.268127	9
>tr|A0A7E6FE51|A0A7E6FE51_OCTVU filamin-A isoform X1 OS=Octopus vulgaris OX=6645 GN=LOC115220251 PE=3 SV=1	874.427	874.931	287	295	EPTGNTKGA	0.134235	9
>tr|A0A7E6FE51|A0A7E6FE51_OCTVU filamin-A isoform X1 OS=Octopus vulgaris OX=6645 GN=LOC115220251 PE=3 SV=1	879.493	880.038	1580	1587	TPSGKKVY	0.135792	8
>tr|A0A7E6FE51|A0A7E6FE51_OCTVU filamin-A isoform X1 OS=Octopus vulgaris OX=6645 GN=LOC115220251 PE=3 SV=1	880.441	880.979	342	349	TPKVEGSY	0.0718655	8
>tr|A0A7E6FE51|A0A7E6FE51_OCTVU filamin-A isoform X1 OS=Octopus vulgaris OX=6645 GN=LOC115220251 PE=3 SV=1	889.46	890.099	1323	1330	NMPVKPGF	0.776933	8
>tr|A0A7E6FE51|A0A7E6FE51_OCTVU filamin-A isoform X1 OS=Octopus vulgaris OX=6645 GN=LOC115220251 PE=3 SV=1	889.535	890.074	846	853	KVKVESSI	0.0342147	8
>tr|A0A7E6FE51|A0A7E6FE51_OCTVU filamin-A isoform X1 OS=Octopus vulgaris OX=6645 GN=LOC115220251 PE=3 SV=1	891.457	892.005	538	545	TPKQPGTY	0.221525	8
>tr|A0A7E6FE51|A0A7E6FE51_OCTVU filamin-A isoform X1 OS=Octopus vulgaris OX=6645 GN=LOC115220251 PE=3 SV=1	892.441	892.99	1877	1884	KPTEPGTY	0.194417	8
>tr|A0A7E6FE51|A0A7E6FE51_OCTVU filamin-A isoform X1 OS=Octopus vulgaris OX=6645 GN=LOC115220251 PE=3 SV=1	895.463	895.996	2182	2189	PKENGTHL	0.213979	8
>tr|A0A7E6FE51|A0A7E6FE51_OCTVU filamin-A isoform X1 OS=Octopus vulgaris OX=6645 GN=LOC115220251 PE=3 SV=1	897.366	897.985	2077	2084	VCTEPGEY	0.139232	8
>tr|A0A7E6FE51|A0A7E6FE51_OCTVU filamin-A isoform X1 OS=Octopus vulgaris OX=6645 GN=LOC115220251 PE=3 SV=1	898.485	899.003	2227	2234	QGRTRQVA	0.0823838	8
>tr|A0A7E6FE51|A0A7E6FE51_OCTVU filamin-A isoform X1 OS=Octopus vulgaris OX=6645 GN=LOC115220251 PE=3 SV=1	903.38	903.886	415	423	TDPSGNQNA	0.104591	9
>tr|A0A7E6FE51|A0A7E6FE51_OCTVU filamin-A isoform X1 OS=Octopus vulgaris OX=6645 GN=LOC115220251 PE=3 SV=1	905.455	906.098	1323	1330	NMPVKPGF	0.776933	8
>tr|A0A7E6FE51|A0A7E6FE51_OCTVU filamin-A isoform X1 OS=Octopus vulgaris OX=6645 GN=LOC115220251 PE=3 SV=1	913.412	913.928	1465	1472	RDSNGHDI	0.217398	8
>tr|A0A7E6FE51|A0A7E6FE51_OCTVU filamin-A isoform X1 OS=Octopus vulgaris OX=6645 GN=LOC115220251 PE=3 SV=1	913.437	913.968	1646	1654	THGVVNESA	0.0430142	9
>tr|A0A7E6FE51|A0A7E6FE51_OCTVU filamin-A isoform X1 OS=Octopus vulgaris OX=6645 GN=LOC115220251 PE=3 SV=1	913.462	914.009	2337	2345	QSDPSKVVA	0.181555	9
>tr|A0A7E6FE51|A0A7E6FE51_OCTVU filamin-A isoform X1 OS=Octopus vulgaris OX=6645 GN=LOC115220251 PE=3 SV=1	915.512	916.034	2227	2234	QGRTRQVA	0.0823838	8
>tr|A0A7E6FE51|A0A7E6FE51_OCTVU filamin-A isoform X1 OS=Octopus vulgaris OX=6645 GN=LOC115220251 PE=3 SV=1	930.489	931.039	2337	2345	QSDPSKVVA	0.181555	9
>tr|A0A7E6FE51|A0A7E6FE51_OCTVU filamin-A isoform X1 OS=Octopus vulgaris OX=6645 GN=LOC115220251 PE=3 SV=1	931.437	931.981	982	991	GVSVEGPSEA	0.0908547	10
>tr|A0A7E6FE51|A0A7E6FE51_OCTVU filamin-A isoform X1 OS=Octopus vulgaris OX=6645 GN=LOC115220251 PE=3 SV=1	934.514	935.14	1456	1464	GTGKVTCRI	0.202325	9
>tr|A0A7E6FE51|A0A7E6FE51_OCTVU filamin-A isoform X1 OS=Octopus vulgaris OX=6645 GN=LOC115220251 PE=3 SV=1	935.45	936.078	505	513	GDGDMKVTI	0.311733	9
>tr|A0A7E6FE51|A0A7E6FE51_OCTVU filamin-A isoform X1 OS=Octopus vulgaris OX=6645 GN=LOC115220251 PE=3 SV=1	936.599	937.18	732	739	KNVKHVVL	0.0863774	8
>tr|A0A7E6FE51|A0A7E6FE51_OCTVU filamin-A isoform X1 OS=Octopus vulgaris OX=6645 GN=LOC115220251 PE=3 SV=1	938.483	939.059	1272	1279	EVTVTDKF	0.0890239	8
>tr|A0A7E6FE51|A0A7E6FE51_OCTVU filamin-A isoform X1 OS=Octopus vulgaris OX=6645 GN=LOC115220251 PE=3 SV=1	940.437	940.991	717	724	KDNKDGTY	0.135216	8
>tr|A0A7E6FE51|A0A7E6FE51_OCTVU filamin-A isoform X1 OS=Octopus vulgaris OX=6645 GN=LOC115220251 PE=3 SV=1	951.445	952.077	505	513	GDGDMKVTI	0.311733	9
>tr|A0A7E6FE51|A0A7E6FE51_OCTVU filamin-A isoform X1 OS=Octopus vulgaris OX=6645 GN=LOC115220251 PE=3 SV=1	951.463	952.012	1734	1743	SVGSSSEVSL	0.129738	10
>tr|A0A7E6FE51|A0A7E6FE51_OCTVU filamin-A isoform X1 OS=Octopus vulgaris OX=6645 GN=LOC115220251 PE=3 SV=1	953.553	954.124	159	167	GGPTPKQRL	0.676423	9
>tr|A0A7E6FE51|A0A7E6FE51_OCTVU filamin-A isoform X1 OS=Octopus vulgaris OX=6645 GN=LOC115220251 PE=3 SV=1	954.468	955.064	1892	1900	DVHVPGSPF	0.503674	9
>tr|A0A7E6FE51|A0A7E6FE51_OCTVU filamin-A isoform X1 OS=Octopus vulgaris OX=6645 GN=LOC115220251 PE=3 SV=1	956.505	957.078	708	716	DGNPVKVDI	0.135833	9
>tr|A0A7E6FE51|A0A7E6FE51_OCTVU filamin-A isoform X1 OS=Octopus vulgaris OX=6645 GN=LOC115220251 PE=3 SV=1	977.542	978.143	1331	1338	DPTKVRVY	0.142125	8
>tr|A0A7E6FE51|A0A7E6FE51_OCTVU filamin-A isoform X1 OS=Octopus vulgaris OX=6645 GN=LOC115220251 PE=3 SV=1	985.466	986.139	1534	1542	CPQPVVDDI	0.271376	9
>tr|A0A7E6FE51|A0A7E6FE51_OCTVU filamin-A isoform X1 OS=Octopus vulgaris OX=6645 GN=LOC115220251 PE=3 SV=1	990.525	991.139	1049	1058	GPGVEKTGVF	0.469112	10
>tr|A0A7E6FE51|A0A7E6FE51_OCTVU filamin-A isoform X1 OS=Octopus vulgaris OX=6645 GN=LOC115220251 PE=3 SV=1	995.374	996.003	615	624	DCKDNGDGTA	0.273058	10
>tr|A0A7E6FE51|A0A7E6FE51_OCTVU filamin-A isoform X1 OS=Octopus vulgaris OX=6645 GN=LOC115220251 PE=3 SV=1	999.474	1000.06	592	601	VVETHGETGA	0.0478689	10
>tr|A0A7E6FE51|A0A7E6FE51_OCTVU filamin-A isoform X1 OS=Octopus vulgaris OX=6645 GN=LOC115220251 PE=3 SV=1	1007.35	1008.18	248	255	DEMSMMTY	0.372158	8
>tr|A0A7E6FE51|A0A7E6FE51_OCTVU filamin-A isoform X1 OS=Octopus vulgaris OX=6645 GN=LOC115220251 PE=3 SV=1	1014.64	1015.25	1818	1827	GKVKVTGRGI	0.187671	10
>tr|A0A7E6FE51|A0A7E6FE51_OCTVU filamin-A isoform X1 OS=Octopus vulgaris OX=6645 GN=LOC115220251 PE=3 SV=1	1018.5	1019.11	1782	1790	TPHEVGEHL	0.118359	9
>tr|A0A7E6FE51|A0A7E6FE51_OCTVU filamin-A isoform X1 OS=Octopus vulgaris OX=6645 GN=LOC115220251 PE=3 SV=1	1023.35	1024.18	248	255	DEMSMMTY	0.372158	8
>tr|A0A7E6FE51|A0A7E6FE51_OCTVU filamin-A isoform X1 OS=Octopus vulgaris OX=6645 GN=LOC115220251 PE=3 SV=1	1036.34	1037.01	16	24	DEDDEDMPA	0.242276	9
>tr|A0A7E6FE51|A0A7E6FE51_OCTVU filamin-A isoform X1 OS=Octopus vulgaris OX=6645 GN=LOC115220251 PE=3 SV=1	1039.34	1040.18	248	255	DEMSMMTY	0.372158	8
>tr|A0A7E6FE51|A0A7E6FE51_OCTVU filamin-A isoform X1 OS=Octopus vulgaris OX=6645 GN=LOC115220251 PE=3 SV=1	1048.62	1049.27	441	450	TPKVPGVHTI	0.12015	10
>tr|A0A7E6FE51|A0A7E6FE51_OCTVU filamin-A isoform X1 OS=Octopus vulgaris OX=6645 GN=LOC115220251 PE=3 SV=1	1052.34	1053.01	16	24	DEDDEDMPA	0.242276	9
>tr|A0A7E6FE51|A0A7E6FE51_OCTVU filamin-A isoform X1 OS=Octopus vulgaris OX=6645 GN=LOC115220251 PE=3 SV=1	1053.55	1054.2	1314	1322	NQHVPKSPF	0.436151	9
>tr|A0A7E6FE51|A0A7E6FE51_OCTVU filamin-A isoform X1 OS=Octopus vulgaris OX=6645 GN=LOC115220251 PE=3 SV=1	1055.34	1056.18	248	255	DEMSMMTY	0.372158	8
>tr|A0A7E6FE51|A0A7E6FE51_OCTVU filamin-A isoform X1 OS=Octopus vulgaris OX=6645 GN=LOC115220251 PE=3 SV=1	1069.59	1070.2	1723	1731	TPSEPRRRA	0.343173	9
>tr|A0A7E6FE51|A0A7E6FE51_OCTVU filamin-A isoform X1 OS=Octopus vulgaris OX=6645 GN=LOC115220251 PE=3 SV=1	1072.5	1073.22	1299	1308	TVPEEGPCQL	0.203296	10
>tr|A0A7E6FE51|A0A7E6FE51_OCTVU filamin-A isoform X1 OS=Octopus vulgaris OX=6645 GN=LOC115220251 PE=3 SV=1	1093.59	1094.26	756	765	VQSPSSVKVY	0.15493	10
>tr|A0A7E6FE51|A0A7E6FE51_OCTVU filamin-A isoform X1 OS=Octopus vulgaris OX=6645 GN=LOC115220251 PE=3 SV=1	1099.44	1100.16	2261	2269	DCREVEEGY	0.0904459	9
>tr|A0A7E6FE51|A0A7E6FE51_OCTVU filamin-A isoform X1 OS=Octopus vulgaris OX=6645 GN=LOC115220251 PE=3 SV=1	1100.58	1101.32	1137	1147	VPGCDPSKVKA	0.499841	11
>tr|A0A7E6FE51|A0A7E6FE51_OCTVU filamin-A isoform X1 OS=Octopus vulgaris OX=6645 GN=LOC115220251 PE=3 SV=1	1156.69	1157.4	2250	2260	VTVEGPSKVKL	0.133564	11
>tr|A0A7E6FE51|A0A7E6FE51_OCTVU filamin-A isoform X1 OS=Octopus vulgaris OX=6645 GN=LOC115220251 PE=3 SV=1	1188.59	1189.38	1758	1768	KTPSGKEEPCI	0.256128	11
>tr|A0A7E6FE51|A0A7E6FE51_OCTVU filamin-A isoform X1 OS=Octopus vulgaris OX=6645 GN=LOC115220251 PE=3 SV=1	1199.66	1200.39	1544	1554	KPVKVDEVQSA	0.0567081	11
>tr|A0A7E6FE51|A0A7E6FE51_OCTVU filamin-A isoform X1 OS=Octopus vulgaris OX=6645 GN=LOC115220251 PE=3 SV=1	1202.59	1203.3	2146	2157	KVVSPSGVEDDA	0.080913	12
>tr|A0A7E6FE51|A0A7E6FE51_OCTVU filamin-A isoform X1 OS=Octopus vulgaris OX=6645 GN=LOC115220251 PE=3 SV=1	1217.69	1218.45	1249	1259	KGVKPKEPTSF	0.245099	11
>tr|A0A7E6FE51|A0A7E6FE51_OCTVU filamin-A isoform X1 OS=Octopus vulgaris OX=6645 GN=LOC115220251 PE=3 SV=1	1261.55	1262.39	2028	2038	EKGEVHSPCEF	0.254773	11
>tr|A0A7E6FE51|A0A7E6FE51_OCTVU filamin-A isoform X1 OS=Octopus vulgaris OX=6645 GN=LOC115220251 PE=3 SV=1	1284.66	1285.45	387	398	EPGNVVSVVTHF	0.207819	12
>tr|A0A7E6FE51|A0A7E6FE51_OCTVU filamin-A isoform X1 OS=Octopus vulgaris OX=6645 GN=LOC115220251 PE=3 SV=1	1315.7	1316.47	1070	1082	TPVTTNGDGKVRA	0.0710242	13
>tr|A0A7E6FE51|A0A7E6FE51_OCTVU filamin-A isoform X1 OS=Octopus vulgaris OX=6645 GN=LOC115220251 PE=3 SV=1	1342.57	1343.42	2065	2076	EDRKDGSCGVNY	0.202563	12
>tr|A0A7E6FE51|A0A7E6FE51_OCTVU filamin-A isoform X1 OS=Octopus vulgaris OX=6645 GN=LOC115220251 PE=3 SV=1	1351.66	1352.46	1591	1602	EDNKNGTVGVRY	0.0956634	12
>tr|A0A7E6FE51|A0A7E6FE51_OCTVU filamin-A isoform X1 OS=Octopus vulgaris OX=6645 GN=LOC115220251 PE=3 SV=1	1369.71	1370.56	917	928	KEPGPHKVEVSY	0.158979	12
>tr|A0A7E6FE51|A0A7E6FE51_OCTVU filamin-A isoform X1 OS=Octopus vulgaris OX=6645 GN=LOC115220251 PE=3 SV=1	1372.67	1373.65	2375	2387	VGMRGPKGPCEEL	0.465825	13
>tr|A0A7E6FE51|A0A7E6FE51_OCTVU filamin-A isoform X1 OS=Octopus vulgaris OX=6645 GN=LOC115220251 PE=3 SV=1	1388.67	1389.65	2375	2387	VGMRGPKGPCEEL	0.465825	13
>tr|A0A7E6FE51|A0A7E6FE51_OCTVU filamin-A isoform X1 OS=Octopus vulgaris OX=6645 GN=LOC115220251 PE=3 SV=1	1419.75	1420.68	864	875	EKTQEVGKEKMI	0.113351	12
>tr|A0A7E6FE51|A0A7E6FE51_OCTVU filamin-A isoform X1 OS=Octopus vulgaris OX=6645 GN=LOC115220251 PE=3 SV=1	1421.72	1422.66	425	436	KPKMTRQPDGTY	0.157946	12
>tr|A0A7E6FE51|A0A7E6FE51_OCTVU filamin-A isoform X1 OS=Octopus vulgaris OX=6645 GN=LOC115220251 PE=3 SV=1	1435.75	1436.68	864	875	EKTQEVGKEKMI	0.113351	12
>tr|A0A7E6FE51|A0A7E6FE51_OCTVU filamin-A isoform X1 OS=Octopus vulgaris OX=6645 GN=LOC115220251 PE=3 SV=1	1437.72	1438.66	425	436	KPKMTRQPDGTY	0.157946	12
>tr|A0A7E6FE51|A0A7E6FE51_OCTVU filamin-A isoform X1 OS=Octopus vulgaris OX=6645 GN=LOC115220251 PE=3 SV=1	1474.74	1475.72	317	329	NPKGQKEPCEVVF	0.454697	13
>tr|A0A7E6FE51|A0A7E6FE51_OCTVU filamin-A isoform X1 OS=Octopus vulgaris OX=6645 GN=LOC115220251 PE=3 SV=1	1478.69	1479.62	992	1005	KVNCTDNKDGTVNA	0.0880709	14
>tr|A0A7E6FE51|A0A7E6FE51_OCTVU filamin-A isoform X1 OS=Octopus vulgaris OX=6645 GN=LOC115220251 PE=3 SV=1	1492.72	1493.68	1956	1970	SVTSPSGVTEVCDVI	0.094716	15
>tr|A0A7E6FE51|A0A7E6FE51_OCTVU filamin-A isoform X1 OS=Octopus vulgaris OX=6645 GN=LOC115220251 PE=3 SV=1	1507.67	1508.66	676	688	QETGVQVQQMTEF	0.0780332	13
>tr|A0A7E6FE51|A0A7E6FE51_OCTVU filamin-A isoform X1 OS=Octopus vulgaris OX=6645 GN=LOC115220251 PE=3 SV=1	1518.62	1519.66	1681	1694	NCVDNKDGTCTVSY	0.201904	14
>tr|A0A7E6FE51|A0A7E6FE51_OCTVU filamin-A isoform X1 OS=Octopus vulgaris OX=6645 GN=LOC115220251 PE=3 SV=1	1519.57	1520.6	1863	1876	ECKDNDDGTCGVTY	0.284972	14
>tr|A0A7E6FE51|A0A7E6FE51_OCTVU filamin-A isoform X1 OS=Octopus vulgaris OX=6645 GN=LOC115220251 PE=3 SV=1	1523.67	1524.66	676	688	QETGVQVQQMTEF	0.0780332	13
>tr|A0A7E6FE51|A0A7E6FE51_OCTVU filamin-A isoform X1 OS=Octopus vulgaris OX=6645 GN=LOC115220251 PE=3 SV=1	1524.7	1525.69	676	688	QETGVQVQQMTEF	0.0780332	13
>tr|A0A7E6FE51|A0A7E6FE51_OCTVU filamin-A isoform X1 OS=Octopus vulgaris OX=6645 GN=LOC115220251 PE=3 SV=1	1540.69	1541.69	676	688	QETGVQVQQMTEF	0.0780332	13
>tr|A0A7E6FE51|A0A7E6FE51_OCTVU filamin-A isoform X1 OS=Octopus vulgaris OX=6645 GN=LOC115220251 PE=3 SV=1	1663.89	1664.92	766	781	GPGVKPGVKTNQPTHF	0.5764	16
>tr|A0A7E6FE51|A0A7E6FE51_OCTVU filamin-A isoform X1 OS=Octopus vulgaris OX=6645 GN=LOC115220251 PE=3 SV=1	1669.93	1671.02	892	907	TNPKGVKTTVPTKPMA	0.150835	16
>tr|A0A7E6FE51|A0A7E6FE51_OCTVU filamin-A isoform X1 OS=Octopus vulgaris OX=6645 GN=LOC115220251 PE=3 SV=1	1685.93	1687.02	892	907	TNPKGVKTTVPTKPMA	0.150835	16
>tr|A0A7E6FE51|A0A7E6FE51_OCTVU filamin-A isoform X1 OS=Octopus vulgaris OX=6645 GN=LOC115220251 PE=3 SV=1	1755.95	1757.01	2315	2330	SVVVETVTKTSTTTRF	0.0983213	16
>tr|A0A7E6FE51|A0A7E6FE51_OCTVU filamin-A isoform X1 OS=Octopus vulgaris OX=6645 GN=LOC115220251 PE=3 SV=1	1792.02	1793.19	1433	1448	TKGTEKTVMVKKETVI	0.0452167	16
>tr|A0A7E6FE51|A0A7E6FE51_OCTVU filamin-A isoform X1 OS=Octopus vulgaris OX=6645 GN=LOC115220251 PE=3 SV=1	1808.02	1809.19	1433	1448	TKGTEKTVMVKKETVI	0.0452167	16
>tr|A0A7E6FE51|A0A7E6FE51_OCTVU filamin-A isoform X1 OS=Octopus vulgaris OX=6645 GN=LOC115220251 PE=3 SV=1	1871.77	1873.11	1186	1201	KMTCKDNHDGTCQVEY	0.108802	16
>tr|A0A7E6FE51|A0A7E6FE51_OCTVU filamin-A isoform X1 OS=Octopus vulgaris OX=6645 GN=LOC115220251 PE=3 SV=1	1887.77	1889.1	1186	1201	KMTCKDNHDGTCQVEY	0.108802	16
>tr|A0A7E6FE51|A0A7E6FE51_OCTVU filamin-A isoform X1 OS=Octopus vulgaris OX=6645 GN=LOC115220251 PE=3 SV=1	2172.14	2173.62	1982	2000	VPKEMGVHTVSVKHKDMHI	0.231463	19
>tr|A0A7E6FE51|A0A7E6FE51_OCTVU filamin-A isoform X1 OS=Octopus vulgaris OX=6645 GN=LOC115220251 PE=3 SV=1	2188.14	2189.62	1982	2000	VPKEMGVHTVSVKHKDMHI	0.231463	19
>tr|A0A7E6FE51|A0A7E6FE51_OCTVU filamin-A isoform X1 OS=Octopus vulgaris OX=6645 GN=LOC115220251 PE=3 SV=1	2204.13	2205.62	1982	2000	VPKEMGVHTVSVKHKDMHI	0.231463	19
>tr|A0A7E6FE51|A0A7E6FE51_OCTVU filamin-A isoform X1 OS=Octopus vulgaris OX=6645 GN=LOC115220251 PE=3 SV=1	2209.97	2211.34	798	817	TDERGMDVPVNTVDNQDGTF	0.0889999	20
>tr|A0A7E6FE51|A0A7E6FE51_OCTVU filamin-A isoform X1 OS=Octopus vulgaris OX=6645 GN=LOC115220251 PE=3 SV=1	2225.96	2227.34	798	817	TDERGMDVPVNTVDNQDGTF	0.0889999	20
>tr|A0A7E6FE51|A0A7E6FE51_OCTVU filamin-A isoform X1 OS=Octopus vulgaris OX=6645 GN=LOC115220251 PE=3 SV=1	2360.19	2361.7	1226	1248	HVPVETPVDPSKVKCQGPGVDTA	0.161404	23
>Cluster-58773.164376;orf1 len=615 frame:1 start:1 end:1845 gi|762093591|ref|XP_011429255.1| PREDICTED: paramyosin-like isoform X1 [Crassostrea gigas]	802.405	802.867	167	173	GERVDNL	0.14532	7
>Cluster-58773.164376;orf1 len=615 frame:1 start:1 end:1845 gi|762093591|ref|XP_011429255.1| PREDICTED: paramyosin-like isoform X1 [Crassostrea gigas]	812.39	812.862	334	339	EEEHRI	0.0609379	6
>Cluster-58773.164376;orf1 len=615 frame:1 start:1 end:1845 gi|762093591|ref|XP_011429255.1| PREDICTED: paramyosin-like isoform X1 [Crassostrea gigas]	817.482	818.038	65	70	KRRMNL	0.43683	6
>Cluster-58773.164376;orf1 len=615 frame:1 start:1 end:1845 gi|762093591|ref|XP_011429255.1| PREDICTED: paramyosin-like isoform X1 [Crassostrea gigas]	830.473	830.965	132	138	GKRVEEL	0.0631432	7
>Cluster-58773.164376;orf1 len=615 frame:1 start:1 end:1845 gi|762093591|ref|XP_011429255.1| PREDICTED: paramyosin-like isoform X1 [Crassostrea gigas]	833.477	834.037	65	70	KRRMNL	0.43683	6
>Cluster-58773.164376;orf1 len=615 frame:1 start:1 end:1845 gi|762093591|ref|XP_011429255.1| PREDICTED: paramyosin-like isoform X1 [Crassostrea gigas]	843.432	843.92	383	389	HETTSRL	0.0944676	7
>Cluster-58773.164376;orf1 len=615 frame:1 start:1 end:1845 gi|762093591|ref|XP_011429255.1| PREDICTED: paramyosin-like isoform X1 [Crassostrea gigas]	849.395	849.878	220	226	RDTEESL	0.0499942	7
>Cluster-58773.164376;orf1 len=615 frame:1 start:1 end:1845 gi|762093591|ref|XP_011429255.1| PREDICTED: paramyosin-like isoform X1 [Crassostrea gigas]	860.47	860.954	372	378	ERSRKNA	0.0676784	7
>Cluster-58773.164376;orf1 len=615 frame:1 start:1 end:1845 gi|762093591|ref|XP_011429255.1| PREDICTED: paramyosin-like isoform X1 [Crassostrea gigas]	887.506	888.02	80	86	EQSRVRI	0.0993298	7
>Cluster-58773.164376;orf1 len=615 frame:1 start:1 end:1845 gi|762093591|ref|XP_011429255.1| PREDICTED: paramyosin-like isoform X1 [Crassostrea gigas]	887.542	888.064	118	124	TKKNRQL	0.073155	7
>Cluster-58773.164376;orf1 len=615 frame:1 start:1 end:1845 gi|762093591|ref|XP_011429255.1| PREDICTED: paramyosin-like isoform X1 [Crassostrea gigas]	888.49	889.005	174	180	TRENKQL	0.0682502	7
>Cluster-58773.164376;orf1 len=615 frame:1 start:1 end:1845 gi|762093591|ref|XP_011429255.1| PREDICTED: paramyosin-like isoform X1 [Crassostrea gigas]	895.452	895.994	277	283	VEVETRY	0.0509066	7
>Cluster-58773.164376;orf1 len=615 frame:1 start:1 end:1845 gi|762093591|ref|XP_011429255.1| PREDICTED: paramyosin-like isoform X1 [Crassostrea gigas]	902.469	902.988	531	537	EDDRRVI	0.108586	7
>Cluster-58773.164376;orf1 len=615 frame:1 start:1 end:1845 gi|762093591|ref|XP_011429255.1| PREDICTED: paramyosin-like isoform X1 [Crassostrea gigas]	902.517	903.035	400	406	TNDKRRL	0.236033	7
>Cluster-58773.164376;orf1 len=615 frame:1 start:1 end:1845 gi|762093591|ref|XP_011429255.1| PREDICTED: paramyosin-like isoform X1 [Crassostrea gigas]	903.428	903.932	306	313	DVSNRQNA	0.0832163	8
>Cluster-58773.164376;orf1 len=615 frame:1 start:1 end:1845 gi|762093591|ref|XP_011429255.1| PREDICTED: paramyosin-like isoform X1 [Crassostrea gigas]	918.453	918.985	252	258	REKDEEI	0.0348151	7
>Cluster-58773.164376;orf1 len=615 frame:1 start:1 end:1845 gi|762093591|ref|XP_011429255.1| PREDICTED: paramyosin-like isoform X1 [Crassostrea gigas]	925.449	925.982	153	159	EQENHRL	0.166203	7
>Cluster-58773.164376;orf1 len=615 frame:1 start:1 end:1845 gi|762093591|ref|XP_011429255.1| PREDICTED: paramyosin-like isoform X1 [Crassostrea gigas]	938.421	938.975	446	452	KQEQENY	0.0553215	7
>Cluster-58773.164376;orf1 len=615 frame:1 start:1 end:1845 gi|762093591|ref|XP_011429255.1| PREDICTED: paramyosin-like isoform X1 [Crassostrea gigas]	962.553	963.134	517	523	RKVERQF	0.118182	7
>Cluster-58773.164376;orf1 len=615 frame:1 start:1 end:1845 gi|762093591|ref|XP_011429255.1| PREDICTED: paramyosin-like isoform X1 [Crassostrea gigas]	974.574	975.143	348	355	SVSERKRI	0.156556	8
>Cluster-58773.164376;orf1 len=615 frame:1 start:1 end:1845 gi|762093591|ref|XP_011429255.1| PREDICTED: paramyosin-like isoform X1 [Crassostrea gigas]	1034.5	1035.17	244	251	RSEMENRL	0.259034	8
>Cluster-58773.164376;orf1 len=615 frame:1 start:1 end:1845 gi|762093591|ref|XP_011429255.1| PREDICTED: paramyosin-like isoform X1 [Crassostrea gigas]	1050.5	1051.17	244	251	RSEMENRL	0.259034	8
>Cluster-58773.164376;orf1 len=615 frame:1 start:1 end:1845 gi|762093591|ref|XP_011429255.1| PREDICTED: paramyosin-like isoform X1 [Crassostrea gigas]	1057.56	1058.26	481	489	QREGKRMVA	0.135184	9
>Cluster-58773.164376;orf1 len=615 frame:1 start:1 end:1845 gi|762093591|ref|XP_011429255.1| PREDICTED: paramyosin-like isoform X1 [Crassostrea gigas]	1073.55	1074.25	481	489	QREGKRMVA	0.135184	9
>Cluster-58773.164376;orf1 len=615 frame:1 start:1 end:1845 gi|762093591|ref|XP_011429255.1| PREDICTED: paramyosin-like isoform X1 [Crassostrea gigas]	1074.58	1075.29	481	489	QREGKRMVA	0.135184	9
>Cluster-58773.164376;orf1 len=615 frame:1 start:1 end:1845 gi|762093591|ref|XP_011429255.1| PREDICTED: paramyosin-like isoform X1 [Crassostrea gigas]	1090.58	1091.29	481	489	QREGKRMVA	0.135184	9
>Cluster-58773.164376;orf1 len=615 frame:1 start:1 end:1845 gi|762093591|ref|XP_011429255.1| PREDICTED: paramyosin-like isoform X1 [Crassostrea gigas]	1136.5	1137.15	23	32	EEESESNTVL	0.0655392	10
>Cluster-58773.164376;orf1 len=615 frame:1 start:1 end:1845 gi|762093591|ref|XP_011429255.1| PREDICTED: paramyosin-like isoform X1 [Crassostrea gigas]	1259.65	1260.36	503	512	EVEQRRSREA	0.048979	10
>Cluster-58773.164376;orf1 len=615 frame:1 start:1 end:1845 gi|762093591|ref|XP_011429255.1| PREDICTED: paramyosin-like isoform X1 [Crassostrea gigas]	1562.85	1563.83	596	608	VRRSRSMSVSREI	0.0749648	13
>Cluster-58773.164376;orf1 len=615 frame:1 start:1 end:1845 gi|762093591|ref|XP_011429255.1| PREDICTED: paramyosin-like isoform X1 [Crassostrea gigas]	1578.85	1579.83	596	608	VRRSRSMSVSREI	0.0749648	13
>Cluster-58773.163468;orf1 len=382 frame:1 start:88 end:1233 gi|410935705|gb|AFV94409.1| thioester-containing protein 1 [Euprymna scolopes]	808.351	808.891	283	290	NETSGMGL	0.279906	8
>Cluster-58773.163468;orf1 len=382 frame:1 start:88 end:1233 gi|410935705|gb|AFV94409.1| thioester-containing protein 1 [Euprymna scolopes]	820.471	821.036	154	160	VKMRSSL	0.118541	7
>Cluster-58773.163468;orf1 len=382 frame:1 start:88 end:1233 gi|410935705|gb|AFV94409.1| thioester-containing protein 1 [Euprymna scolopes]	824.346	824.89	283	290	NETSGMGL	0.279906	8
>Cluster-58773.163468;orf1 len=382 frame:1 start:88 end:1233 gi|410935705|gb|AFV94409.1| thioester-containing protein 1 [Euprymna scolopes]	836.466	837.035	154	160	VKMRSSL	0.118541	7
>Cluster-58773.163468;orf1 len=382 frame:1 start:88 end:1233 gi|410935705|gb|AFV94409.1| thioester-containing protein 1 [Euprymna scolopes]	850.415	850.906	164	171	DSTQSTVI	0.0764659	8
>Cluster-58773.163468;orf1 len=382 frame:1 start:88 end:1233 gi|410935705|gb|AFV94409.1| thioester-containing protein 1 [Euprymna scolopes]	881.4	881.923	194	201	NVVDNTGY	0.103245	8
>Cluster-58773.163468;orf1 len=382 frame:1 start:88 end:1233 gi|410935705|gb|AFV94409.1| thioester-containing protein 1 [Euprymna scolopes]	923.44	924.073	61	68	RSVPGNMY	0.382996	8
>Cluster-58773.163468;orf1 len=382 frame:1 start:88 end:1233 gi|410935705|gb|AFV94409.1| thioester-containing protein 1 [Euprymna scolopes]	939.435	940.072	61	68	RSVPGNMY	0.382996	8
>Cluster-58773.163468;orf1 len=382 frame:1 start:88 end:1233 gi|410935705|gb|AFV94409.1| thioester-containing protein 1 [Euprymna scolopes]	942.41	943.032	265	272	NCTSSQRF	0.425297	8
>Cluster-58773.163468;orf1 len=382 frame:1 start:88 end:1233 gi|410935705|gb|AFV94409.1| thioester-containing protein 1 [Euprymna scolopes]	1035.51	1036.14	327	334	DEVPREKY	0.0978026	8
>Cluster-58773.163468;orf1 len=382 frame:1 start:88 end:1233 gi|410935705|gb|AFV94409.1| thioester-containing protein 1 [Euprymna scolopes]	1042.42	1043.17	184	193	SSCCDQSVTI	0.380641	10
>Cluster-58773.163468;orf1 len=382 frame:1 start:88 end:1233 gi|410935705|gb|AFV94409.1| thioester-containing protein 1 [Euprymna scolopes]	1063.53	1064.14	250	258	KEEESKSNI	0.0437401	9
>Cluster-58773.163468;orf1 len=382 frame:1 start:88 end:1233 gi|410935705|gb|AFV94409.1| thioester-containing protein 1 [Euprymna scolopes]	1072.61	1073.24	139	147	KRNEVEKGL	0.092679	9
>Cluster-58773.163468;orf1 len=382 frame:1 start:88 end:1233 gi|410935705|gb|AFV94409.1| thioester-containing protein 1 [Euprymna scolopes]	1105.47	1106.2	122	131	VEEPDVEMSA	0.111983	10
>Cluster-58773.163468;orf1 len=382 frame:1 start:88 end:1233 gi|410935705|gb|AFV94409.1| thioester-containing protein 1 [Euprymna scolopes]	1109.47	1110.09	43	52	ESTRNSTDEA	0.0420815	10
>Cluster-58773.163468;orf1 len=382 frame:1 start:88 end:1233 gi|410935705|gb|AFV94409.1| thioester-containing protein 1 [Euprymna scolopes]	1116.51	1117.16	362	371	DSSESTVKTY	0.109766	10
>Cluster-58773.163468;orf1 len=382 frame:1 start:88 end:1233 gi|410935705|gb|AFV94409.1| thioester-containing protein 1 [Euprymna scolopes]	1121.47	1122.2	122	131	VEEPDVEMSA	0.111983	10
>Cluster-58773.163468;orf1 len=382 frame:1 start:88 end:1233 gi|410935705|gb|AFV94409.1| thioester-containing protein 1 [Euprymna scolopes]	1149.66	1150.44	107	115	KSMKVKRSW	0.273758	9
>Cluster-58773.163468;orf1 len=382 frame:1 start:88 end:1233 gi|410935705|gb|AFV94409.1| thioester-containing protein 1 [Euprymna scolopes]	1165.65	1166.44	107	115	KSMKVKRSW	0.273758	9
>Cluster-58773.163468;orf1 len=382 frame:1 start:88 end:1233 gi|410935705|gb|AFV94409.1| thioester-containing protein 1 [Euprymna scolopes]	1225.62	1226.45	218	228	KHVMPPDTTSI	0.157294	11
>Cluster-58773.163468;orf1 len=382 frame:1 start:88 end:1233 gi|410935705|gb|AFV94409.1| thioester-containing protein 1 [Euprymna scolopes]	1241.62	1242.45	218	228	KHVMPPDTTSI	0.157294	11
>tr|A0A6P7TDP2|A0A6P7TDP2_OCTVU 70 kDa neurofilament protein isoform X1 OS=Octopus vulgaris OX=6645 GN=LOC115222954 PE=3 SV=1	845.411	845.893	51	58	QSSQRSVA	0.136888	8
>tr|A0A6P7TDP2|A0A6P7TDP2_OCTVU 70 kDa neurofilament protein isoform X1 OS=Octopus vulgaris OX=6645 GN=LOC115222954 PE=3 SV=1	851.356	851.916	330	338	SDMSGQVGA	0.247222	9
>tr|A0A6P7TDP2|A0A6P7TDP2_OCTVU 70 kDa neurofilament protein isoform X1 OS=Octopus vulgaris OX=6645 GN=LOC115222954 PE=3 SV=1	862.368	862.871	144	150	EEEVEDL	0.0402779	7
>tr|A0A6P7TDP2|A0A6P7TDP2_OCTVU 70 kDa neurofilament protein isoform X1 OS=Octopus vulgaris OX=6645 GN=LOC115222954 PE=3 SV=1	862.438	862.923	51	58	QSSQRSVA	0.136888	8
>tr|A0A6P7TDP2|A0A6P7TDP2_OCTVU 70 kDa neurofilament protein isoform X1 OS=Octopus vulgaris OX=6645 GN=LOC115222954 PE=3 SV=1	867.351	867.915	330	338	SDMSGQVGA	0.247222	9
>tr|A0A6P7TDP2|A0A6P7TDP2_OCTVU 70 kDa neurofilament protein isoform X1 OS=Octopus vulgaris OX=6645 GN=LOC115222954 PE=3 SV=1	876.431	876.944	127	133	EDKDKEL	0.0872635	7
>tr|A0A6P7TDP2|A0A6P7TDP2_OCTVU 70 kDa neurofilament protein isoform X1 OS=Octopus vulgaris OX=6645 GN=LOC115222954 PE=3 SV=1	879.432	879.953	100	106	NRSQVEF	0.234599	7
>tr|A0A6P7TDP2|A0A6P7TDP2_OCTVU 70 kDa neurofilament protein isoform X1 OS=Octopus vulgaris OX=6645 GN=LOC115222954 PE=3 SV=1	904.51	905.045	136	143	VKSKNESL	0.068962	8
>tr|A0A6P7TDP2|A0A6P7TDP2_OCTVU 70 kDa neurofilament protein isoform X1 OS=Octopus vulgaris OX=6645 GN=LOC115222954 PE=3 SV=1	945.464	946.011	218	225	QSETTQRL	0.220729	8
>tr|A0A6P7TDP2|A0A6P7TDP2_OCTVU 70 kDa neurofilament protein isoform X1 OS=Octopus vulgaris OX=6645 GN=LOC115222954 PE=3 SV=1	962.49	963.041	218	225	QSETTQRL	0.220729	8
>tr|A0A6P7TDP2|A0A6P7TDP2_OCTVU 70 kDa neurofilament protein isoform X1 OS=Octopus vulgaris OX=6645 GN=LOC115222954 PE=3 SV=1	977.49	978.053	547	555	KDDKGKESA	0.0681337	9
>tr|A0A6P7TDP2|A0A6P7TDP2_OCTVU 70 kDa neurofilament protein isoform X1 OS=Octopus vulgaris OX=6645 GN=LOC115222954 PE=3 SV=1	984.486	985.051	518	528	GSKHGSGQGGI	0.354293	11
>tr|A0A6P7TDP2|A0A6P7TDP2_OCTVU 70 kDa neurofilament protein isoform X1 OS=Octopus vulgaris OX=6645 GN=LOC115222954 PE=3 SV=1	1049.56	1050.21	257	265	SKTQKVPDF	0.176437	9
>tr|A0A6P7TDP2|A0A6P7TDP2_OCTVU 70 kDa neurofilament protein isoform X1 OS=Octopus vulgaris OX=6645 GN=LOC115222954 PE=3 SV=1	1146.55	1147.24	492	501	ENGKTNVHTF	0.146926	10
>tr|A0A6P7TDP2|A0A6P7TDP2_OCTVU 70 kDa neurofilament protein isoform X1 OS=Octopus vulgaris OX=6645 GN=LOC115222954 PE=3 SV=1	1147.63	1148.42	508	517	SVGKNMVKVW	0.417623	10
>tr|A0A6P7TDP2|A0A6P7TDP2_OCTVU 70 kDa neurofilament protein isoform X1 OS=Octopus vulgaris OX=6645 GN=LOC115222954 PE=3 SV=1	1163.62	1164.42	508	517	SVGKNMVKVW	0.417623	10
>tr|A0A6P7TDP2|A0A6P7TDP2_OCTVU 70 kDa neurofilament protein isoform X1 OS=Octopus vulgaris OX=6645 GN=LOC115222954 PE=3 SV=1	1314.69	1315.44	155	164	RQVQDERDRL	0.207396	10
>tr|A0A6P7TDP2|A0A6P7TDP2_OCTVU 70 kDa neurofilament protein isoform X1 OS=Octopus vulgaris OX=6645 GN=LOC115222954 PE=3 SV=1	1436.71	1437.52	181	192	DSETSRRRTSEL	0.0854451	12
>tr|A0A6P7TDP2|A0A6P7TDP2_OCTVU 70 kDa neurofilament protein isoform X1 OS=Octopus vulgaris OX=6645 GN=LOC115222954 PE=3 SV=1	1537.8	1538.77	443	457	SKVTMSRSTTGNVGI	0.0946495	15
>tr|A0A6P7TDP2|A0A6P7TDP2_OCTVU 70 kDa neurofilament protein isoform X1 OS=Octopus vulgaris OX=6645 GN=LOC115222954 PE=3 SV=1	1553.8	1554.77	443	457	SKVTMSRSTTGNVGI	0.0946495	15
>tr|A0A6P7TDP2|A0A6P7TDP2_OCTVU 70 kDa neurofilament protein isoform X1 OS=Octopus vulgaris OX=6645 GN=LOC115222954 PE=3 SV=1	1564.8	1565.8	59	71	EMKNSSQKEKKDL	0.0924824	13
>tr|A0A6P7TDP2|A0A6P7TDP2_OCTVU 70 kDa neurofilament protein isoform X1 OS=Octopus vulgaris OX=6645 GN=LOC115222954 PE=3 SV=1	1576.66	1577.74	411	424	EGEESRVSSMMTSF	0.242602	14
>tr|A0A6P7TDP2|A0A6P7TDP2_OCTVU 70 kDa neurofilament protein isoform X1 OS=Octopus vulgaris OX=6645 GN=LOC115222954 PE=3 SV=1	1580.79	1581.8	59	71	EMKNSSQKEKKDL	0.0924824	13
>tr|A0A6P7TDP2|A0A6P7TDP2_OCTVU 70 kDa neurofilament protein isoform X1 OS=Octopus vulgaris OX=6645 GN=LOC115222954 PE=3 SV=1	1591.81	1592.79	317	329	RVSTENRRSRMEA	0.0655317	13
>tr|A0A6P7TDP2|A0A6P7TDP2_OCTVU 70 kDa neurofilament protein isoform X1 OS=Octopus vulgaris OX=6645 GN=LOC115222954 PE=3 SV=1	1592.66	1593.74	411	424	EGEESRVSSMMTSF	0.242602	14
>tr|A0A6P7TDP2|A0A6P7TDP2_OCTVU 70 kDa neurofilament protein isoform X1 OS=Octopus vulgaris OX=6645 GN=LOC115222954 PE=3 SV=1	1607.8	1608.79	317	329	RVSTENRRSRMEA	0.0655317	13
>tr|A0A6P7TDP2|A0A6P7TDP2_OCTVU 70 kDa neurofilament protein isoform X1 OS=Octopus vulgaris OX=6645 GN=LOC115222954 PE=3 SV=1	1608.65	1609.74	411	424	EGEESRVSSMMTSF	0.242602	14
>tr|A0A6P7TDP2|A0A6P7TDP2_OCTVU 70 kDa neurofilament protein isoform X1 OS=Octopus vulgaris OX=6645 GN=LOC115222954 PE=3 SV=1	2476.38	2477.81	1	23	MSQVSTKTSKTTRRSRRGPRSSI	0.385613	23
>tr|A0A6P7TDP2|A0A6P7TDP2_OCTVU 70 kDa neurofilament protein isoform X1 OS=Octopus vulgaris OX=6645 GN=LOC115222954 PE=3 SV=1	2518.39	2519.84	1	23	MSQVSTKTSKTTRRSRRGPRSSI	0.385613	23
>tr|A0A6P7TDP2|A0A6P7TDP2_OCTVU 70 kDa neurofilament protein isoform X1 OS=Octopus vulgaris OX=6645 GN=LOC115222954 PE=3 SV=1	2607.42	2609	1	23	MSQVSTKTSKTTRRSRRGPRSSI	0.385613	23
>tr|A0A6P7TDP2|A0A6P7TDP2_OCTVU 70 kDa neurofilament protein isoform X1 OS=Octopus vulgaris OX=6645 GN=LOC115222954 PE=3 SV=1	2623.42	2625	1	23	MSQVSTKTSKTTRRSRRGPRSSI	0.385613	23
>tr|A0A6P7TDP2|A0A6P7TDP2_OCTVU 70 kDa neurofilament protein isoform X1 OS=Octopus vulgaris OX=6645 GN=LOC115222954 PE=3 SV=1	2649.43	2651.04	1	23	MSQVSTKTSKTTRRSRRGPRSSI	0.385613	23
>tr|A0A6P7TDP2|A0A6P7TDP2_OCTVU 70 kDa neurofilament protein isoform X1 OS=Octopus vulgaris OX=6645 GN=LOC115222954 PE=3 SV=1	2665.43	2667.04	1	23	MSQVSTKTSKTTRRSRRGPRSSI	0.385613	23
>tr|I0JGT9|I0JGT9_SEPOF Actin I OS=Sepia officinalis OX=6610 GN=ACTI PE=2 SV=1 >tr|A0A0L8HIZ8|A0A0L8HIZ8_OCTBM Uncharacterized protein OS=Octopus bimaculoides OX=37653 GN=OCBIM_22013417mg PE=3 SV=1 >tr|A0A6P7U2X7|A0A6P7U2X7_OCTVU actin, adductor muscle OS=Octopus vulgaris OX=6645 GN=LOC115232513 PE=3 SV=1	810.264	810.882	1	7	MCDDDVA	0.266437	7
>tr|I0JGT9|I0JGT9_SEPOF Actin I OS=Sepia officinalis OX=6610 GN=ACTI PE=2 SV=1 >tr|A0A0L8HIZ8|A0A0L8HIZ8_OCTBM Uncharacterized protein OS=Octopus bimaculoides OX=37653 GN=OCBIM_22013417mg PE=3 SV=1 >tr|A0A6P7U2X7|A0A6P7U2X7_OCTVU actin, adductor muscle OS=Octopus vulgaris OX=6645 GN=LOC115232513 PE=3 SV=1	820.42	820.926	99	105	PEEHPVL	0.24514	7
>tr|I0JGT9|I0JGT9_SEPOF Actin I OS=Sepia officinalis OX=6610 GN=ACTI PE=2 SV=1 >tr|A0A0L8HIZ8|A0A0L8HIZ8_OCTBM Uncharacterized protein OS=Octopus bimaculoides OX=37653 GN=OCBIM_22013417mg PE=3 SV=1 >tr|A0A6P7U2X7|A0A6P7U2X7_OCTVU actin, adductor muscle OS=Octopus vulgaris OX=6645 GN=LOC115232513 PE=3 SV=1	823.369	824.012	284	290	MKCDVDI	0.18328	7
>tr|I0JGT9|I0JGT9_SEPOF Actin I OS=Sepia officinalis OX=6610 GN=ACTI PE=2 SV=1 >tr|A0A0L8HIZ8|A0A0L8HIZ8_OCTBM Uncharacterized protein OS=Octopus bimaculoides OX=37653 GN=OCBIM_22013417mg PE=3 SV=1 >tr|A0A6P7U2X7|A0A6P7U2X7_OCTVU actin, adductor muscle OS=Octopus vulgaris OX=6645 GN=LOC115232513 PE=3 SV=1	826.259	826.881	1	7	MCDDDVA	0.266437	7
>tr|I0JGT9|I0JGT9_SEPOF Actin I OS=Sepia officinalis OX=6610 GN=ACTI PE=2 SV=1 >tr|A0A0L8HIZ8|A0A0L8HIZ8_OCTBM Uncharacterized protein OS=Octopus bimaculoides OX=37653 GN=OCBIM_22013417mg PE=3 SV=1 >tr|A0A6P7U2X7|A0A6P7U2X7_OCTVU actin, adductor muscle OS=Octopus vulgaris OX=6645 GN=LOC115232513 PE=3 SV=1	839.364	840.011	284	290	MKCDVDI	0.18328	7
>tr|I0JGT9|I0JGT9_SEPOF Actin I OS=Sepia officinalis OX=6610 GN=ACTI PE=2 SV=1 >tr|A0A0L8HIZ8|A0A0L8HIZ8_OCTBM Uncharacterized protein OS=Octopus bimaculoides OX=37653 GN=OCBIM_22013417mg PE=3 SV=1 >tr|A0A6P7U2X7|A0A6P7U2X7_OCTVU actin, adductor muscle OS=Octopus vulgaris OX=6645 GN=LOC115232513 PE=3 SV=1	919.467	920.082	312	318	DRMQKEI	0.112689	7
>tr|I0JGT9|I0JGT9_SEPOF Actin I OS=Sepia officinalis OX=6610 GN=ACTI PE=2 SV=1 >tr|A0A0L8HIZ8|A0A0L8HIZ8_OCTBM Uncharacterized protein OS=Octopus bimaculoides OX=37653 GN=OCBIM_22013417mg PE=3 SV=1 >tr|A0A6P7U2X7|A0A6P7U2X7_OCTVU actin, adductor muscle OS=Octopus vulgaris OX=6645 GN=LOC115232513 PE=3 SV=1	935.462	936.081	312	318	DRMQKEI	0.112689	7
>tr|I0JGT9|I0JGT9_SEPOF Actin I OS=Sepia officinalis OX=6610 GN=ACTI PE=2 SV=1 >tr|A0A0L8HIZ8|A0A0L8HIZ8_OCTBM Uncharacterized protein OS=Octopus bimaculoides OX=37653 GN=OCBIM_22013417mg PE=3 SV=1 >tr|A0A6P7U2X7|A0A6P7U2X7_OCTVU actin, adductor muscle OS=Octopus vulgaris OX=6645 GN=LOC115232513 PE=3 SV=1	1019.53	1020.2	116	123	NREKMTQI	0.0748942	8
>tr|I0JGT9|I0JGT9_SEPOF Actin I OS=Sepia officinalis OX=6610 GN=ACTI PE=2 SV=1 >tr|A0A0L8HIZ8|A0A0L8HIZ8_OCTBM Uncharacterized protein OS=Octopus bimaculoides OX=37653 GN=OCBIM_22013417mg PE=3 SV=1 >tr|A0A6P7U2X7|A0A6P7U2X7_OCTVU actin, adductor muscle OS=Octopus vulgaris OX=6645 GN=LOC115232513 PE=3 SV=1	1035.53	1036.2	116	123	NREKMTQI	0.0748942	8
>tr|I0JGT9|I0JGT9_SEPOF Actin I OS=Sepia officinalis OX=6610 GN=ACTI PE=2 SV=1 >tr|A0A0L8HIZ8|A0A0L8HIZ8_OCTBM Uncharacterized protein OS=Octopus bimaculoides OX=37653 GN=OCBIM_22013417mg PE=3 SV=1 >tr|A0A6P7U2X7|A0A6P7U2X7_OCTVU actin, adductor muscle OS=Octopus vulgaris OX=6645 GN=LOC115232513 PE=3 SV=1	1080.48	1081.26	10	20	VVDNGSGMCKA	0.288108	11
>tr|I0JGT9|I0JGT9_SEPOF Actin I OS=Sepia officinalis OX=6610 GN=ACTI PE=2 SV=1 >tr|A0A0L8HIZ8|A0A0L8HIZ8_OCTBM Uncharacterized protein OS=Octopus bimaculoides OX=37653 GN=OCBIM_22013417mg PE=3 SV=1 >tr|A0A6P7U2X7|A0A6P7U2X7_OCTVU actin, adductor muscle OS=Octopus vulgaris OX=6645 GN=LOC115232513 PE=3 SV=1	1096.48	1097.26	10	20	VVDNGSGMCKA	0.288108	11
>tr|I0JGT9|I0JGT9_SEPOF Actin I OS=Sepia officinalis OX=6610 GN=ACTI PE=2 SV=1 >tr|A0A0L8HIZ8|A0A0L8HIZ8_OCTBM Uncharacterized protein OS=Octopus bimaculoides OX=37653 GN=OCBIM_22013417mg PE=3 SV=1 >tr|A0A6P7U2X7|A0A6P7U2X7_OCTVU actin, adductor muscle OS=Octopus vulgaris OX=6645 GN=LOC115232513 PE=3 SV=1	1197.57	1198.28	155	166	DSGDGVTHTVPI	0.166217	12
>tr|I0JGT9|I0JGT9_SEPOF Actin I OS=Sepia officinalis OX=6610 GN=ACTI PE=2 SV=1 >tr|A0A0L8HIZ8|A0A0L8HIZ8_OCTBM Uncharacterized protein OS=Octopus bimaculoides OX=37653 GN=OCBIM_22013417mg PE=3 SV=1 >tr|A0A6P7U2X7|A0A6P7U2X7_OCTVU actin, adductor muscle OS=Octopus vulgaris OX=6645 GN=LOC115232513 PE=3 SV=1	2102.04	2103.45	36	54	VGRPRHQGVMVGMGQKDSY	0.18713	19
>tr|I0JGT9|I0JGT9_SEPOF Actin I OS=Sepia officinalis OX=6610 GN=ACTI PE=2 SV=1 >tr|A0A0L8HIZ8|A0A0L8HIZ8_OCTBM Uncharacterized protein OS=Octopus bimaculoides OX=37653 GN=OCBIM_22013417mg PE=3 SV=1 >tr|A0A6P7U2X7|A0A6P7U2X7_OCTVU actin, adductor muscle OS=Octopus vulgaris OX=6645 GN=LOC115232513 PE=3 SV=1	2118.03	2119.45	36	54	VGRPRHQGVMVGMGQKDSY	0.18713	19
>tr|I0JGT9|I0JGT9_SEPOF Actin I OS=Sepia officinalis OX=6610 GN=ACTI PE=2 SV=1 >tr|A0A0L8HIZ8|A0A0L8HIZ8_OCTBM Uncharacterized protein OS=Octopus bimaculoides OX=37653 GN=OCBIM_22013417mg PE=3 SV=1 >tr|A0A6P7U2X7|A0A6P7U2X7_OCTVU actin, adductor muscle OS=Octopus vulgaris OX=6645 GN=LOC115232513 PE=3 SV=1	2134.03	2135.45	36	54	VGRPRHQGVMVGMGQKDSY	0.18713	19
>tr|A0A6P7SM13|A0A6P7SM13_OCTVU actin, cytoplasmic OS=Octopus vulgaris OX=6645 GN=LOC115214121 PE=3 SV=1	820.42	820.926	98	104	PEEHPVL	0.24514	7
>tr|A0A6P7SM13|A0A6P7SM13_OCTVU actin, cytoplasmic OS=Octopus vulgaris OX=6645 GN=LOC115214121 PE=3 SV=1	823.369	824.012	283	289	MKCDVDI	0.18328	7
>tr|A0A6P7SM13|A0A6P7SM13_OCTVU actin, cytoplasmic OS=Octopus vulgaris OX=6645 GN=LOC115214121 PE=3 SV=1	836.346	836.901	224	230	EQEMQTA	0.0628298	7
>tr|A0A6P7SM13|A0A6P7SM13_OCTVU actin, cytoplasmic OS=Octopus vulgaris OX=6645 GN=LOC115214121 PE=3 SV=1	839.364	840.011	283	289	MKCDVDI	0.18328	7
>tr|A0A6P7SM13|A0A6P7SM13_OCTVU actin, cytoplasmic OS=Octopus vulgaris OX=6645 GN=LOC115214121 PE=3 SV=1	852.34	852.9	224	230	EQEMQTA	0.0628298	7
>tr|A0A6P7SM13|A0A6P7SM13_OCTVU actin, cytoplasmic OS=Octopus vulgaris OX=6645 GN=LOC115214121 PE=3 SV=1	882.344	882.995	11	19	DNGSGMCKA	0.47364	9
>tr|A0A6P7SM13|A0A6P7SM13_OCTVU actin, cytoplasmic OS=Octopus vulgaris OX=6645 GN=LOC115214121 PE=3 SV=1	898.339	898.995	11	19	DNGSGMCKA	0.47364	9
>tr|A0A6P7SM13|A0A6P7SM13_OCTVU actin, cytoplasmic OS=Octopus vulgaris OX=6645 GN=LOC115214121 PE=3 SV=1	919.467	920.082	311	317	DRMQKEI	0.112689	7
>tr|A0A6P7SM13|A0A6P7SM13_OCTVU actin, cytoplasmic OS=Octopus vulgaris OX=6645 GN=LOC115214121 PE=3 SV=1	935.462	936.081	311	317	DRMQKEI	0.112689	7
>tr|A0A6P7SM13|A0A6P7SM13_OCTVU actin, cytoplasmic OS=Octopus vulgaris OX=6645 GN=LOC115214121 PE=3 SV=1	1019.53	1020.2	115	122	NREKMTQI	0.0748942	8
>tr|A0A6P7SM13|A0A6P7SM13_OCTVU actin, cytoplasmic OS=Octopus vulgaris OX=6645 GN=LOC115214121 PE=3 SV=1	1035.53	1036.2	115	122	NREKMTQI	0.0748942	8
>tr|A0A6P7SM13|A0A6P7SM13_OCTVU actin, cytoplasmic OS=Octopus vulgaris OX=6645 GN=LOC115214121 PE=3 SV=1	1427.68	1428.61	152	165	VMDSGDGVTHTVPI	0.108386	14
>tr|A0A6P7SM13|A0A6P7SM13_OCTVU actin, cytoplasmic OS=Octopus vulgaris OX=6645 GN=LOC115214121 PE=3 SV=1	1443.68	1444.61	152	165	VMDSGDGVTHTVPI	0.108386	14
>tr|A0A6P7SM13|A0A6P7SM13_OCTVU actin, cytoplasmic OS=Octopus vulgaris OX=6645 GN=LOC115214121 PE=3 SV=1	2102.04	2103.45	35	53	VGRPRHQGVMVGMGQKDSY	0.18713	19
>tr|A0A6P7SM13|A0A6P7SM13_OCTVU actin, cytoplasmic OS=Octopus vulgaris OX=6645 GN=LOC115214121 PE=3 SV=1	2118.03	2119.45	35	53	VGRPRHQGVMVGMGQKDSY	0.18713	19
>tr|A0A6P7SM13|A0A6P7SM13_OCTVU actin, cytoplasmic OS=Octopus vulgaris OX=6645 GN=LOC115214121 PE=3 SV=1	2134.03	2135.45	35	53	VGRPRHQGVMVGMGQKDSY	0.18713	19
>tr|A0A6P7SU44|A0A6P7SU44_OCTVU cartilage matrix protein-like OS=Octopus vulgaris OX=6645 GN=LOC115216517 PE=4 SV=1	803.412	803.858	324	331	KNGGRSNA	0.115114	8
>tr|A0A6P7SU44|A0A6P7SU44_OCTVU cartilage matrix protein-like OS=Octopus vulgaris OX=6645 GN=LOC115216517 PE=4 SV=1	806.327	806.768	339	346	TDGNSNQA	0.066027	8
>tr|A0A6P7SU44|A0A6P7SU44_OCTVU cartilage matrix protein-like OS=Octopus vulgaris OX=6645 GN=LOC115216517 PE=4 SV=1	846.41	846.923	575	581	SDNKHVF	0.45291	7
>tr|A0A6P7SU44|A0A6P7SU44_OCTVU cartilage matrix protein-like OS=Octopus vulgaris OX=6645 GN=LOC115216517 PE=4 SV=1	868.475	868.977	516	523	VHGSRKNA	0.106468	8
>tr|A0A6P7SU44|A0A6P7SU44_OCTVU cartilage matrix protein-like OS=Octopus vulgaris OX=6645 GN=LOC115216517 PE=4 SV=1	892.475	892.999	470	476	SNVRNRF	0.570143	7
>tr|A0A6P7SU44|A0A6P7SU44_OCTVU cartilage matrix protein-like OS=Octopus vulgaris OX=6645 GN=LOC115216517 PE=4 SV=1	945.548	946.101	107	115	SKVTQRGGI	0.143084	9
>tr|A0A6P7SU44|A0A6P7SU44_OCTVU cartilage matrix protein-like OS=Octopus vulgaris OX=6645 GN=LOC115216517 PE=4 SV=1	945.548	946.101	275	282	STKVRNQI	0.052261	8
>tr|A0A6P7SU44|A0A6P7SU44_OCTVU cartilage matrix protein-like OS=Octopus vulgaris OX=6645 GN=LOC115216517 PE=4 SV=1	984.49	985.094	84	91	STHVHKEF	0.182897	8
>tr|A0A6P7SU44|A0A6P7SU44_OCTVU cartilage matrix protein-like OS=Octopus vulgaris OX=6645 GN=LOC115216517 PE=4 SV=1	1009.44	1010.01	531	540	TDGQSDSKTA	0.079952	10
>tr|A0A6P7SU44|A0A6P7SU44_OCTVU cartilage matrix protein-like OS=Octopus vulgaris OX=6645 GN=LOC115216517 PE=4 SV=1	1052.57	1053.21	381	389	SSDKKKNVF	0.393241	9
>tr|A0A6P7SU44|A0A6P7SU44_OCTVU cartilage matrix protein-like OS=Octopus vulgaris OX=6645 GN=LOC115216517 PE=4 SV=1	1116.56	1117.21	560	570	GVGQSVDRGEL	0.235315	11
>tr|A0A6P7SU44|A0A6P7SU44_OCTVU cartilage matrix protein-like OS=Octopus vulgaris OX=6645 GN=LOC115216517 PE=4 SV=1	1494.75	1495.75	411	425	TTPPPPVCGVTPTDI	0.280886	15
>tr|A0A6P7SU44|A0A6P7SU44_OCTVU cartilage matrix protein-like OS=Octopus vulgaris OX=6645 GN=LOC115216517 PE=4 SV=1	1514.77	1515.67	66	80	VSDSVVGPDNVQVSL	0.158853	15
>tr|A0A6P7SU44|A0A6P7SU44_OCTVU cartilage matrix protein-like OS=Octopus vulgaris OX=6645 GN=LOC115216517 PE=4 SV=1	2755.27	2757.15	17	42	TVQHGSSVPTTVSVQDCGTTKVDMMF	0.0202871	26
>tr|A0A6P7SU44|A0A6P7SU44_OCTVU cartilage matrix protein-like OS=Octopus vulgaris OX=6645 GN=LOC115216517 PE=4 SV=1	2771.27	2773.15	17	42	TVQHGSSVPTTVSVQDCGTTKVDMMF	0.0202871	26
>tr|A0A6P7SU44|A0A6P7SU44_OCTVU cartilage matrix protein-like OS=Octopus vulgaris OX=6645 GN=LOC115216517 PE=4 SV=1	2787.26	2789.15	17	42	TVQHGSSVPTTVSVQDCGTTKVDMMF	0.0202871	26
>Cluster-58773.146985;orf1 len=322 frame:-1 start:1003 end:38 gi|762092086|ref|XP_011428466.1| PREDICTED: periostin-like [Crassostrea gigas]>gi|405960569|gb|EKC26483.1| Transforming growth factor-beta-induced protein ig-h3 [Crassostrea gigas]	808.385	808.88	1	6	PDHHRF	0.813791	6
>Cluster-58773.146985;orf1 len=322 frame:-1 start:1003 end:38 gi|762092086|ref|XP_011428466.1| PREDICTED: periostin-like [Crassostrea gigas]>gi|405960569|gb|EKC26483.1| Transforming growth factor-beta-induced protein ig-h3 [Crassostrea gigas]	809.353	809.985	66	72	MQGPMTL	0.662238	7
>Cluster-58773.146985;orf1 len=322 frame:-1 start:1003 end:38 gi|762092086|ref|XP_011428466.1| PREDICTED: periostin-like [Crassostrea gigas]>gi|405960569|gb|EKC26483.1| Transforming growth factor-beta-induced protein ig-h3 [Crassostrea gigas]	824.462	824.961	151	157	NVVKHDI	0.055122	7
>Cluster-58773.146985;orf1 len=322 frame:-1 start:1003 end:38 gi|762092086|ref|XP_011428466.1| PREDICTED: periostin-like [Crassostrea gigas]>gi|405960569|gb|EKC26483.1| Transforming growth factor-beta-induced protein ig-h3 [Crassostrea gigas]	832.416	832.894	260	267	KSSHSSSI	0.101596	8
>Cluster-58773.146985;orf1 len=322 frame:-1 start:1003 end:38 gi|762092086|ref|XP_011428466.1| PREDICTED: periostin-like [Crassostrea gigas]>gi|405960569|gb|EKC26483.1| Transforming growth factor-beta-induced protein ig-h3 [Crassostrea gigas]	848.429	849.002	225	231	RMDQSVL	0.177817	7
>Cluster-58773.146985;orf1 len=322 frame:-1 start:1003 end:38 gi|762092086|ref|XP_011428466.1| PREDICTED: periostin-like [Crassostrea gigas]>gi|405960569|gb|EKC26483.1| Transforming growth factor-beta-induced protein ig-h3 [Crassostrea gigas]	850.395	850.917	1	6	PDHHRF	0.813791	6
>Cluster-58773.146985;orf1 len=322 frame:-1 start:1003 end:38 gi|762092086|ref|XP_011428466.1| PREDICTED: periostin-like [Crassostrea gigas]>gi|405960569|gb|EKC26483.1| Transforming growth factor-beta-induced protein ig-h3 [Crassostrea gigas]	863.485	864.001	210	216	GRRQTVF	0.380683	7
>Cluster-58773.146985;orf1 len=322 frame:-1 start:1003 end:38 gi|762092086|ref|XP_011428466.1| PREDICTED: periostin-like [Crassostrea gigas]>gi|405960569|gb|EKC26483.1| Transforming growth factor-beta-induced protein ig-h3 [Crassostrea gigas]	864.424	865.002	225	231	RMDQSVL	0.177817	7
>Cluster-58773.146985;orf1 len=322 frame:-1 start:1003 end:38 gi|762092086|ref|XP_011428466.1| PREDICTED: periostin-like [Crassostrea gigas]>gi|405960569|gb|EKC26483.1| Transforming growth factor-beta-induced protein ig-h3 [Crassostrea gigas]	905.469	905.989	279	287	STSGGEVRL	0.154605	9
>Cluster-58773.146985;orf1 len=322 frame:-1 start:1003 end:38 gi|762092086|ref|XP_011428466.1| PREDICTED: periostin-like [Crassostrea gigas]>gi|405960569|gb|EKC26483.1| Transforming growth factor-beta-induced protein ig-h3 [Crassostrea gigas]	1017.41	1018.16	299	307	ECDNGMVHI	0.308138	9
>Cluster-58773.146985;orf1 len=322 frame:-1 start:1003 end:38 gi|762092086|ref|XP_011428466.1| PREDICTED: periostin-like [Crassostrea gigas]>gi|405960569|gb|EKC26483.1| Transforming growth factor-beta-induced protein ig-h3 [Crassostrea gigas]	1033.41	1034.16	299	307	ECDNGMVHI	0.308138	9
>Cluster-58773.146985;orf1 len=322 frame:-1 start:1003 end:38 gi|762092086|ref|XP_011428466.1| PREDICTED: periostin-like [Crassostrea gigas]>gi|405960569|gb|EKC26483.1| Transforming growth factor-beta-induced protein ig-h3 [Crassostrea gigas]	1185.6	1186.31	172	182	NVPEGTVEEVL	0.0763927	11
>Cluster-58773.146985;orf1 len=322 frame:-1 start:1003 end:38 gi|762092086|ref|XP_011428466.1| PREDICTED: periostin-like [Crassostrea gigas]>gi|405960569|gb|EKC26483.1| Transforming growth factor-beta-induced protein ig-h3 [Crassostrea gigas]	1365.66	1366.61	7	18	CPRNTTTNSKML	0.425004	12
>Cluster-58773.146985;orf1 len=322 frame:-1 start:1003 end:38 gi|762092086|ref|XP_011428466.1| PREDICTED: periostin-like [Crassostrea gigas]>gi|405960569|gb|EKC26483.1| Transforming growth factor-beta-induced protein ig-h3 [Crassostrea gigas]	1381.66	1382.61	7	18	CPRNTTTNSKML	0.425004	12
>tr|A0A0L8FFZ3|A0A0L8FFZ3_OCTBM Tyrosinase_Cu-bd domain-containing protein (Fragment) OS=Octopus bimaculoides OX=37653 GN=OCBIM_22022789mg PE=4 SV=1	805.435	805.98	313	318	KRMQKD	0.113242	6
>tr|A0A0L8FFZ3|A0A0L8FFZ3_OCTBM Tyrosinase_Cu-bd domain-containing protein (Fragment) OS=Octopus bimaculoides OX=37653 GN=OCBIM_22022789mg PE=4 SV=1	821.43	821.98	313	318	KRMQKD	0.113242	6
>tr|A0A0L8FFZ3|A0A0L8FFZ3_OCTBM Tyrosinase_Cu-bd domain-containing protein (Fragment) OS=Octopus bimaculoides OX=37653 GN=OCBIM_22022789mg PE=4 SV=1	823.442	823.933	274	281	VPKQGHSA	0.133085	8
>tr|A0A0L8FFZ3|A0A0L8FFZ3_OCTBM Tyrosinase_Cu-bd domain-containing protein (Fragment) OS=Octopus bimaculoides OX=37653 GN=OCBIM_22022789mg PE=4 SV=1	860.445	861.06	111	117	NVPMRPF	0.853557	7
>tr|A0A0L8FFZ3|A0A0L8FFZ3_OCTBM Tyrosinase_Cu-bd domain-containing protein (Fragment) OS=Octopus bimaculoides OX=37653 GN=OCBIM_22022789mg PE=4 SV=1	876.44	877.059	111	117	NVPMRPF	0.853557	7
>tr|A0A0L8FFZ3|A0A0L8FFZ3_OCTBM Tyrosinase_Cu-bd domain-containing protein (Fragment) OS=Octopus bimaculoides OX=37653 GN=OCBIM_22022789mg PE=4 SV=1	886.42	887.011	123	129	NHDRMTL	0.363662	7
>tr|A0A0L8FFZ3|A0A0L8FFZ3_OCTBM Tyrosinase_Cu-bd domain-containing protein (Fragment) OS=Octopus bimaculoides OX=37653 GN=OCBIM_22022789mg PE=4 SV=1	892.351	892.968	215	222	GGESEMPW	0.555253	8
>tr|A0A0L8FFZ3|A0A0L8FFZ3_OCTBM Tyrosinase_Cu-bd domain-containing protein (Fragment) OS=Octopus bimaculoides OX=37653 GN=OCBIM_22022789mg PE=4 SV=1	902.415	903.01	123	129	NHDRMTL	0.363662	7
>tr|A0A0L8FFZ3|A0A0L8FFZ3_OCTBM Tyrosinase_Cu-bd domain-containing protein (Fragment) OS=Octopus bimaculoides OX=37653 GN=OCBIM_22022789mg PE=4 SV=1	903.526	904.06	248	255	RVKTEVTA	0.0254603	8
>tr|A0A0L8FFZ3|A0A0L8FFZ3_OCTBM Tyrosinase_Cu-bd domain-containing protein (Fragment) OS=Octopus bimaculoides OX=37653 GN=OCBIM_22022789mg PE=4 SV=1	908.346	908.968	215	222	GGESEMPW	0.555253	8
>tr|A0A0L8FFZ3|A0A0L8FFZ3_OCTBM Tyrosinase_Cu-bd domain-containing protein (Fragment) OS=Octopus bimaculoides OX=37653 GN=OCBIM_22022789mg PE=4 SV=1	977.491	978.062	78	85	HHSNVDRI	0.211871	8
>tr|A0A0L8FFZ3|A0A0L8FFZ3_OCTBM Tyrosinase_Cu-bd domain-containing protein (Fragment) OS=Octopus bimaculoides OX=37653 GN=OCBIM_22022789mg PE=4 SV=1	997.47	998.046	284	292	KHEEGNGNL	0.132827	9
>tr|A0A0L8FFZ3|A0A0L8FFZ3_OCTBM Tyrosinase_Cu-bd domain-containing protein (Fragment) OS=Octopus bimaculoides OX=37653 GN=OCBIM_22022789mg PE=4 SV=1	1013.62	1014.22	293	300	VRKNVERL	0.125128	8
>tr|A0A0L8FFZ3|A0A0L8FFZ3_OCTBM Tyrosinase_Cu-bd domain-containing protein (Fragment) OS=Octopus bimaculoides OX=37653 GN=OCBIM_22022789mg PE=4 SV=1	1017.46	1018.08	130	138	THSTPNDVF	0.22504	9
>tr|A0A0L8FFZ3|A0A0L8FFZ3_OCTBM Tyrosinase_Cu-bd domain-containing protein (Fragment) OS=Octopus bimaculoides OX=37653 GN=OCBIM_22022789mg PE=4 SV=1	1143.52	1144.26	56	66	GGRDPHSMSSL	0.597154	11
>tr|A0A0L8FFZ3|A0A0L8FFZ3_OCTBM Tyrosinase_Cu-bd domain-containing protein (Fragment) OS=Octopus bimaculoides OX=37653 GN=OCBIM_22022789mg PE=4 SV=1	1159.52	1160.26	56	66	GGRDPHSMSSL	0.597154	11
>tr|A0A0L8FFZ3|A0A0L8FFZ3_OCTBM Tyrosinase_Cu-bd domain-containing protein (Fragment) OS=Octopus bimaculoides OX=37653 GN=OCBIM_22022789mg PE=4 SV=1	1412.75	1413.58	7	18	NSETKRDPQPKL	0.195449	12
>Cluster-123723.0;orf1 len=1033 frame:2 start:2 end:3100 gi|762085926|ref|XP_011425282.1| PREDICTED: mucin-17-like [Crassostrea gigas] >Cluster-123723.3;orf1 len=1033 frame:2 start:2 end:3100 gi|762085926|ref|XP_011425282.1| PREDICTED: mucin-17-like [Crassostrea gigas] >Cluster-123723.1;orf2 len=1033 frame:2 start:2 end:3100 gi|762085926|ref|XP_011425282.1| PREDICTED: mucin-17-like [Crassostrea g…	802.376	802.93	335	341	HMTPTSI	0.138098	7
>Cluster-123723.0;orf1 len=1033 frame:2 start:2 end:3100 gi|762085926|ref|XP_011425282.1| PREDICTED: mucin-17-like [Crassostrea gigas] >Cluster-123723.3;orf1 len=1033 frame:2 start:2 end:3100 gi|762085926|ref|XP_011425282.1| PREDICTED: mucin-17-like [Crassostrea gigas] >Cluster-123723.1;orf2 len=1033 frame:2 start:2 end:3100 gi|762085926|ref|XP_011425282.1| PREDICTED: mucin-17-like [Crassostrea g…	812.336	812.885	218	224	GDQSCRF	0.836957	7
>Cluster-123723.0;orf1 len=1033 frame:2 start:2 end:3100 gi|762085926|ref|XP_011425282.1| PREDICTED: mucin-17-like [Crassostrea gigas] >Cluster-123723.3;orf1 len=1033 frame:2 start:2 end:3100 gi|762085926|ref|XP_011425282.1| PREDICTED: mucin-17-like [Crassostrea gigas] >Cluster-123723.1;orf2 len=1033 frame:2 start:2 end:3100 gi|762085926|ref|XP_011425282.1| PREDICTED: mucin-17-like [Crassostrea g…	813.392	813.957	225	230	KDTRMF	0.642658	6
>Cluster-123723.0;orf1 len=1033 frame:2 start:2 end:3100 gi|762085926|ref|XP_011425282.1| PREDICTED: mucin-17-like [Crassostrea gigas] >Cluster-123723.3;orf1 len=1033 frame:2 start:2 end:3100 gi|762085926|ref|XP_011425282.1| PREDICTED: mucin-17-like [Crassostrea gigas] >Cluster-123723.1;orf2 len=1033 frame:2 start:2 end:3100 gi|762085926|ref|XP_011425282.1| PREDICTED: mucin-17-like [Crassostrea g…	817.285	817.92	200	206	ECTTCNF	0.427297	7
>Cluster-123723.0;orf1 len=1033 frame:2 start:2 end:3100 gi|762085926|ref|XP_011425282.1| PREDICTED: mucin-17-like [Crassostrea gigas] >Cluster-123723.3;orf1 len=1033 frame:2 start:2 end:3100 gi|762085926|ref|XP_011425282.1| PREDICTED: mucin-17-like [Crassostrea gigas] >Cluster-123723.1;orf2 len=1033 frame:2 start:2 end:3100 gi|762085926|ref|XP_011425282.1| PREDICTED: mucin-17-like [Crassostrea g…	838.351	838.923	514	520	CPDGQRY	0.687574	7
>Cluster-123723.0;orf1 len=1033 frame:2 start:2 end:3100 gi|762085926|ref|XP_011425282.1| PREDICTED: mucin-17-like [Crassostrea gigas] >Cluster-123723.3;orf1 len=1033 frame:2 start:2 end:3100 gi|762085926|ref|XP_011425282.1| PREDICTED: mucin-17-like [Crassostrea gigas] >Cluster-123723.1;orf2 len=1033 frame:2 start:2 end:3100 gi|762085926|ref|XP_011425282.1| PREDICTED: mucin-17-like [Crassostrea g…	839.375	840.014	868	875	SQCKTGCI	0.471752	8
>Cluster-123723.0;orf1 len=1033 frame:2 start:2 end:3100 gi|762085926|ref|XP_011425282.1| PREDICTED: mucin-17-like [Crassostrea gigas] >Cluster-123723.3;orf1 len=1033 frame:2 start:2 end:3100 gi|762085926|ref|XP_011425282.1| PREDICTED: mucin-17-like [Crassostrea gigas] >Cluster-123723.1;orf2 len=1033 frame:2 start:2 end:3100 gi|762085926|ref|XP_011425282.1| PREDICTED: mucin-17-like [Crassostrea g…	871.5	872.018	364	371	QKRSGVTL	0.138932	8
>Cluster-123723.0;orf1 len=1033 frame:2 start:2 end:3100 gi|762085926|ref|XP_011425282.1| PREDICTED: mucin-17-like [Crassostrea gigas] >Cluster-123723.3;orf1 len=1033 frame:2 start:2 end:3100 gi|762085926|ref|XP_011425282.1| PREDICTED: mucin-17-like [Crassostrea gigas] >Cluster-123723.1;orf2 len=1033 frame:2 start:2 end:3100 gi|762085926|ref|XP_011425282.1| PREDICTED: mucin-17-like [Crassostrea g…	875.41	875.916	910	917	ENGESVQI	0.0515856	8
>Cluster-123723.0;orf1 len=1033 frame:2 start:2 end:3100 gi|762085926|ref|XP_011425282.1| PREDICTED: mucin-17-like [Crassostrea gigas] >Cluster-123723.3;orf1 len=1033 frame:2 start:2 end:3100 gi|762085926|ref|XP_011425282.1| PREDICTED: mucin-17-like [Crassostrea gigas] >Cluster-123723.1;orf2 len=1033 frame:2 start:2 end:3100 gi|762085926|ref|XP_011425282.1| PREDICTED: mucin-17-like [Crassostrea g…	888.526	889.049	364	371	QKRSGVTL	0.138932	8
>Cluster-123723.0;orf1 len=1033 frame:2 start:2 end:3100 gi|762085926|ref|XP_011425282.1| PREDICTED: mucin-17-like [Crassostrea gigas] >Cluster-123723.3;orf1 len=1033 frame:2 start:2 end:3100 gi|762085926|ref|XP_011425282.1| PREDICTED: mucin-17-like [Crassostrea gigas] >Cluster-123723.1;orf2 len=1033 frame:2 start:2 end:3100 gi|762085926|ref|XP_011425282.1| PREDICTED: mucin-17-like [Crassostrea g…	899.367	900.13	417	424	CTECTVML	0.374734	8
>Cluster-123723.0;orf1 len=1033 frame:2 start:2 end:3100 gi|762085926|ref|XP_011425282.1| PREDICTED: mucin-17-like [Crassostrea gigas] >Cluster-123723.3;orf1 len=1033 frame:2 start:2 end:3100 gi|762085926|ref|XP_011425282.1| PREDICTED: mucin-17-like [Crassostrea gigas] >Cluster-123723.1;orf2 len=1033 frame:2 start:2 end:3100 gi|762085926|ref|XP_011425282.1| PREDICTED: mucin-17-like [Crassostrea g…	915.362	916.129	417	424	CTECTVML	0.374734	8
>Cluster-123723.0;orf1 len=1033 frame:2 start:2 end:3100 gi|762085926|ref|XP_011425282.1| PREDICTED: mucin-17-like [Crassostrea gigas] >Cluster-123723.3;orf1 len=1033 frame:2 start:2 end:3100 gi|762085926|ref|XP_011425282.1| PREDICTED: mucin-17-like [Crassostrea gigas] >Cluster-123723.1;orf2 len=1033 frame:2 start:2 end:3100 gi|762085926|ref|XP_011425282.1| PREDICTED: mucin-17-like [Crassostrea g…	925.391	926.108	993	1000	PSQCPCKY	0.808819	8
>Cluster-123723.0;orf1 len=1033 frame:2 start:2 end:3100 gi|762085926|ref|XP_011425282.1| PREDICTED: mucin-17-like [Crassostrea gigas] >Cluster-123723.3;orf1 len=1033 frame:2 start:2 end:3100 gi|762085926|ref|XP_011425282.1| PREDICTED: mucin-17-like [Crassostrea gigas] >Cluster-123723.1;orf2 len=1033 frame:2 start:2 end:3100 gi|762085926|ref|XP_011425282.1| PREDICTED: mucin-17-like [Crassostrea g…	926.458	927.008	781	788	SVVRSDTY	0.0934955	8
>Cluster-123723.0;orf1 len=1033 frame:2 start:2 end:3100 gi|762085926|ref|XP_011425282.1| PREDICTED: mucin-17-like [Crassostrea gigas] >Cluster-123723.3;orf1 len=1033 frame:2 start:2 end:3100 gi|762085926|ref|XP_011425282.1| PREDICTED: mucin-17-like [Crassostrea gigas] >Cluster-123723.1;orf2 len=1033 frame:2 start:2 end:3100 gi|762085926|ref|XP_011425282.1| PREDICTED: mucin-17-like [Crassostrea g…	928.446	929.095	632	638	NVKMHHY	0.155212	7
>Cluster-123723.0;orf1 len=1033 frame:2 start:2 end:3100 gi|762085926|ref|XP_011425282.1| PREDICTED: mucin-17-like [Crassostrea gigas] >Cluster-123723.3;orf1 len=1033 frame:2 start:2 end:3100 gi|762085926|ref|XP_011425282.1| PREDICTED: mucin-17-like [Crassostrea gigas] >Cluster-123723.1;orf2 len=1033 frame:2 start:2 end:3100 gi|762085926|ref|XP_011425282.1| PREDICTED: mucin-17-like [Crassostrea g…	929.385	929.921	394	401	TTSQDNTY	0.0563551	8
>Cluster-123723.0;orf1 len=1033 frame:2 start:2 end:3100 gi|762085926|ref|XP_011425282.1| PREDICTED: mucin-17-like [Crassostrea gigas] >Cluster-123723.3;orf1 len=1033 frame:2 start:2 end:3100 gi|762085926|ref|XP_011425282.1| PREDICTED: mucin-17-like [Crassostrea gigas] >Cluster-123723.1;orf2 len=1033 frame:2 start:2 end:3100 gi|762085926|ref|XP_011425282.1| PREDICTED: mucin-17-like [Crassostrea g…	944.441	945.094	632	638	NVKMHHY	0.155212	7
>Cluster-123723.0;orf1 len=1033 frame:2 start:2 end:3100 gi|762085926|ref|XP_011425282.1| PREDICTED: mucin-17-like [Crassostrea gigas] >Cluster-123723.3;orf1 len=1033 frame:2 start:2 end:3100 gi|762085926|ref|XP_011425282.1| PREDICTED: mucin-17-like [Crassostrea gigas] >Cluster-123723.1;orf2 len=1033 frame:2 start:2 end:3100 gi|762085926|ref|XP_011425282.1| PREDICTED: mucin-17-like [Crassostrea g…	944.452	945.097	940	946	CRKNHTW	0.456032	7
>Cluster-123723.0;orf1 len=1033 frame:2 start:2 end:3100 gi|762085926|ref|XP_011425282.1| PREDICTED: mucin-17-like [Crassostrea gigas] >Cluster-123723.3;orf1 len=1033 frame:2 start:2 end:3100 gi|762085926|ref|XP_011425282.1| PREDICTED: mucin-17-like [Crassostrea gigas] >Cluster-123723.1;orf2 len=1033 frame:2 start:2 end:3100 gi|762085926|ref|XP_011425282.1| PREDICTED: mucin-17-like [Crassostrea g…	949.547	950.133	666	673	VKKVTNNF	0.102708	8
>Cluster-123723.0;orf1 len=1033 frame:2 start:2 end:3100 gi|762085926|ref|XP_011425282.1| PREDICTED: mucin-17-like [Crassostrea gigas] >Cluster-123723.3;orf1 len=1033 frame:2 start:2 end:3100 gi|762085926|ref|XP_011425282.1| PREDICTED: mucin-17-like [Crassostrea gigas] >Cluster-123723.1;orf2 len=1033 frame:2 start:2 end:3100 gi|762085926|ref|XP_011425282.1| PREDICTED: mucin-17-like [Crassostrea g…	958.539	959.203	270	277	QCKKKVEI	0.0858815	8
>Cluster-123723.0;orf1 len=1033 frame:2 start:2 end:3100 gi|762085926|ref|XP_011425282.1| PREDICTED: mucin-17-like [Crassostrea gigas] >Cluster-123723.3;orf1 len=1033 frame:2 start:2 end:3100 gi|762085926|ref|XP_011425282.1| PREDICTED: mucin-17-like [Crassostrea gigas] >Cluster-123723.1;orf2 len=1033 frame:2 start:2 end:3100 gi|762085926|ref|XP_011425282.1| PREDICTED: mucin-17-like [Crassostrea g…	975.566	976.234	270	277	QCKKKVEI	0.0858815	8
>Cluster-123723.0;orf1 len=1033 frame:2 start:2 end:3100 gi|762085926|ref|XP_011425282.1| PREDICTED: mucin-17-like [Crassostrea gigas] >Cluster-123723.3;orf1 len=1033 frame:2 start:2 end:3100 gi|762085926|ref|XP_011425282.1| PREDICTED: mucin-17-like [Crassostrea gigas] >Cluster-123723.1;orf2 len=1033 frame:2 start:2 end:3100 gi|762085926|ref|XP_011425282.1| PREDICTED: mucin-17-like [Crassostrea g…	980.381	981.098	876	885	SGCQCPDGTL	0.825775	10
>Cluster-123723.0;orf1 len=1033 frame:2 start:2 end:3100 gi|762085926|ref|XP_011425282.1| PREDICTED: mucin-17-like [Crassostrea gigas] >Cluster-123723.3;orf1 len=1033 frame:2 start:2 end:3100 gi|762085926|ref|XP_011425282.1| PREDICTED: mucin-17-like [Crassostrea gigas] >Cluster-123723.1;orf2 len=1033 frame:2 start:2 end:3100 gi|762085926|ref|XP_011425282.1| PREDICTED: mucin-17-like [Crassostrea g…	996.381	996.974	356	363	DHDPHNDF	0.592713	8
>Cluster-123723.0;orf1 len=1033 frame:2 start:2 end:3100 gi|762085926|ref|XP_011425282.1| PREDICTED: mucin-17-like [Crassostrea gigas] >Cluster-123723.3;orf1 len=1033 frame:2 start:2 end:3100 gi|762085926|ref|XP_011425282.1| PREDICTED: mucin-17-like [Crassostrea gigas] >Cluster-123723.1;orf2 len=1033 frame:2 start:2 end:3100 gi|762085926|ref|XP_011425282.1| PREDICTED: mucin-17-like [Crassostrea g…	1004.47	1005.14	983	992	VTSPDGNCVL	0.263603	10
>Cluster-123723.0;orf1 len=1033 frame:2 start:2 end:3100 gi|762085926|ref|XP_011425282.1| PREDICTED: mucin-17-like [Crassostrea gigas] >Cluster-123723.3;orf1 len=1033 frame:2 start:2 end:3100 gi|762085926|ref|XP_011425282.1| PREDICTED: mucin-17-like [Crassostrea gigas] >Cluster-123723.1;orf2 len=1033 frame:2 start:2 end:3100 gi|762085926|ref|XP_011425282.1| PREDICTED: mucin-17-like [Crassostrea g…	1036.42	1037.21	552	560	PCECVNSVW	0.493182	9
>Cluster-123723.0;orf1 len=1033 frame:2 start:2 end:3100 gi|762085926|ref|XP_011425282.1| PREDICTED: mucin-17-like [Crassostrea gigas] >Cluster-123723.3;orf1 len=1033 frame:2 start:2 end:3100 gi|762085926|ref|XP_011425282.1| PREDICTED: mucin-17-like [Crassostrea gigas] >Cluster-123723.1;orf2 len=1033 frame:2 start:2 end:3100 gi|762085926|ref|XP_011425282.1| PREDICTED: mucin-17-like [Crassostrea g…	1039.4	1040.17	974	982	EGCRCPPDY	0.583781	9
>Cluster-123723.0;orf1 len=1033 frame:2 start:2 end:3100 gi|762085926|ref|XP_011425282.1| PREDICTED: mucin-17-like [Crassostrea gigas] >Cluster-123723.3;orf1 len=1033 frame:2 start:2 end:3100 gi|762085926|ref|XP_011425282.1| PREDICTED: mucin-17-like [Crassostrea gigas] >Cluster-123723.1;orf2 len=1033 frame:2 start:2 end:3100 gi|762085926|ref|XP_011425282.1| PREDICTED: mucin-17-like [Crassostrea g…	1072.4	1073.33	792	800	CMRDMCNSL	0.599519	9
>Cluster-123723.0;orf1 len=1033 frame:2 start:2 end:3100 gi|762085926|ref|XP_011425282.1| PREDICTED: mucin-17-like [Crassostrea gigas] >Cluster-123723.3;orf1 len=1033 frame:2 start:2 end:3100 gi|762085926|ref|XP_011425282.1| PREDICTED: mucin-17-like [Crassostrea gigas] >Cluster-123723.1;orf2 len=1033 frame:2 start:2 end:3100 gi|762085926|ref|XP_011425282.1| PREDICTED: mucin-17-like [Crassostrea g…	1083.44	1084.16	840	849	TCPEGTGQQY	0.104136	10
>Cluster-123723.0;orf1 len=1033 frame:2 start:2 end:3100 gi|762085926|ref|XP_011425282.1| PREDICTED: mucin-17-like [Crassostrea gigas] >Cluster-123723.3;orf1 len=1033 frame:2 start:2 end:3100 gi|762085926|ref|XP_011425282.1| PREDICTED: mucin-17-like [Crassostrea gigas] >Cluster-123723.1;orf2 len=1033 frame:2 start:2 end:3100 gi|762085926|ref|XP_011425282.1| PREDICTED: mucin-17-like [Crassostrea g…	1088.4	1089.33	792	800	CMRDMCNSL	0.599519	9
>Cluster-123723.0;orf1 len=1033 frame:2 start:2 end:3100 gi|762085926|ref|XP_011425282.1| PREDICTED: mucin-17-like [Crassostrea gigas] >Cluster-123723.3;orf1 len=1033 frame:2 start:2 end:3100 gi|762085926|ref|XP_011425282.1| PREDICTED: mucin-17-like [Crassostrea gigas] >Cluster-123723.1;orf2 len=1033 frame:2 start:2 end:3100 gi|762085926|ref|XP_011425282.1| PREDICTED: mucin-17-like [Crassostrea g…	1092.57	1093.24	902	909	DKHHKKHY	0.143418	8
>Cluster-123723.0;orf1 len=1033 frame:2 start:2 end:3100 gi|762085926|ref|XP_011425282.1| PREDICTED: mucin-17-like [Crassostrea gigas] >Cluster-123723.3;orf1 len=1033 frame:2 start:2 end:3100 gi|762085926|ref|XP_011425282.1| PREDICTED: mucin-17-like [Crassostrea gigas] >Cluster-123723.1;orf2 len=1033 frame:2 start:2 end:3100 gi|762085926|ref|XP_011425282.1| PREDICTED: mucin-17-like [Crassostrea g…	1101.39	1102.19	527	535	TEEQCPCEY	0.14786	9
>Cluster-123723.0;orf1 len=1033 frame:2 start:2 end:3100 gi|762085926|ref|XP_011425282.1| PREDICTED: mucin-17-like [Crassostrea gigas] >Cluster-123723.3;orf1 len=1033 frame:2 start:2 end:3100 gi|762085926|ref|XP_011425282.1| PREDICTED: mucin-17-like [Crassostrea gigas] >Cluster-123723.1;orf2 len=1033 frame:2 start:2 end:3100 gi|762085926|ref|XP_011425282.1| PREDICTED: mucin-17-like [Crassostrea g…	1104.39	1105.33	792	800	CMRDMCNSL	0.599519	9
>Cluster-123723.0;orf1 len=1033 frame:2 start:2 end:3100 gi|762085926|ref|XP_011425282.1| PREDICTED: mucin-17-like [Crassostrea gigas] >Cluster-123723.3;orf1 len=1033 frame:2 start:2 end:3100 gi|762085926|ref|XP_011425282.1| PREDICTED: mucin-17-like [Crassostrea gigas] >Cluster-123723.1;orf2 len=1033 frame:2 start:2 end:3100 gi|762085926|ref|XP_011425282.1| PREDICTED: mucin-17-like [Crassostrea g…	1108.55	1109.36	564	573	TKQCPKTCSL	0.288474	10
>Cluster-123723.0;orf1 len=1033 frame:2 start:2 end:3100 gi|762085926|ref|XP_011425282.1| PREDICTED: mucin-17-like [Crassostrea gigas] >Cluster-123723.3;orf1 len=1033 frame:2 start:2 end:3100 gi|762085926|ref|XP_011425282.1| PREDICTED: mucin-17-like [Crassostrea gigas] >Cluster-123723.1;orf2 len=1033 frame:2 start:2 end:3100 gi|762085926|ref|XP_011425282.1| PREDICTED: mucin-17-like [Crassostrea g…	1142.43	1143.35	472	482	CPTDCPGGMVY	0.766499	11
>Cluster-123723.0;orf1 len=1033 frame:2 start:2 end:3100 gi|762085926|ref|XP_011425282.1| PREDICTED: mucin-17-like [Crassostrea gigas] >Cluster-123723.3;orf1 len=1033 frame:2 start:2 end:3100 gi|762085926|ref|XP_011425282.1| PREDICTED: mucin-17-like [Crassostrea gigas] >Cluster-123723.1;orf2 len=1033 frame:2 start:2 end:3100 gi|762085926|ref|XP_011425282.1| PREDICTED: mucin-17-like [Crassostrea g…	1150.45	1151.27	951	960	TDCQETCHTL	0.20292	10
>Cluster-123723.0;orf1 len=1033 frame:2 start:2 end:3100 gi|762085926|ref|XP_011425282.1| PREDICTED: mucin-17-like [Crassostrea gigas] >Cluster-123723.3;orf1 len=1033 frame:2 start:2 end:3100 gi|762085926|ref|XP_011425282.1| PREDICTED: mucin-17-like [Crassostrea gigas] >Cluster-123723.1;orf2 len=1033 frame:2 start:2 end:3100 gi|762085926|ref|XP_011425282.1| PREDICTED: mucin-17-like [Crassostrea g…	1158.43	1159.35	472	482	CPTDCPGGMVY	0.766499	11
>Cluster-123723.0;orf1 len=1033 frame:2 start:2 end:3100 gi|762085926|ref|XP_011425282.1| PREDICTED: mucin-17-like [Crassostrea gigas] >Cluster-123723.3;orf1 len=1033 frame:2 start:2 end:3100 gi|762085926|ref|XP_011425282.1| PREDICTED: mucin-17-like [Crassostrea gigas] >Cluster-123723.1;orf2 len=1033 frame:2 start:2 end:3100 gi|762085926|ref|XP_011425282.1| PREDICTED: mucin-17-like [Crassostrea g…	1228.46	1229.34	100	110	VETSQTCCDGW	0.303452	11
>Cluster-123723.0;orf1 len=1033 frame:2 start:2 end:3100 gi|762085926|ref|XP_011425282.1| PREDICTED: mucin-17-like [Crassostrea gigas] >Cluster-123723.3;orf1 len=1033 frame:2 start:2 end:3100 gi|762085926|ref|XP_011425282.1| PREDICTED: mucin-17-like [Crassostrea gigas] >Cluster-123723.1;orf2 len=1033 frame:2 start:2 end:3100 gi|762085926|ref|XP_011425282.1| PREDICTED: mucin-17-like [Crassostrea g…	1317.61	1318.46	285	297	STNGTHVMVDGSL	0.136515	13
>Cluster-123723.0;orf1 len=1033 frame:2 start:2 end:3100 gi|762085926|ref|XP_011425282.1| PREDICTED: mucin-17-like [Crassostrea gigas] >Cluster-123723.3;orf1 len=1033 frame:2 start:2 end:3100 gi|762085926|ref|XP_011425282.1| PREDICTED: mucin-17-like [Crassostrea gigas] >Cluster-123723.1;orf2 len=1033 frame:2 start:2 end:3100 gi|762085926|ref|XP_011425282.1| PREDICTED: mucin-17-like [Crassostrea g…	1333.61	1334.46	285	297	STNGTHVMVDGSL	0.136515	13
>Cluster-123723.0;orf1 len=1033 frame:2 start:2 end:3100 gi|762085926|ref|XP_011425282.1| PREDICTED: mucin-17-like [Crassostrea gigas] >Cluster-123723.3;orf1 len=1033 frame:2 start:2 end:3100 gi|762085926|ref|XP_011425282.1| PREDICTED: mucin-17-like [Crassostrea gigas] >Cluster-123723.1;orf2 len=1033 frame:2 start:2 end:3100 gi|762085926|ref|XP_011425282.1| PREDICTED: mucin-17-like [Crassostrea g…	1339.47	1340.4	183	194	QDCCGERDTGSW	0.592684	12
>Cluster-123723.0;orf1 len=1033 frame:2 start:2 end:3100 gi|762085926|ref|XP_011425282.1| PREDICTED: mucin-17-like [Crassostrea gigas] >Cluster-123723.3;orf1 len=1033 frame:2 start:2 end:3100 gi|762085926|ref|XP_011425282.1| PREDICTED: mucin-17-like [Crassostrea gigas] >Cluster-123723.1;orf2 len=1033 frame:2 start:2 end:3100 gi|762085926|ref|XP_011425282.1| PREDICTED: mucin-17-like [Crassostrea g…	1356.49	1357.43	183	194	QDCCGERDTGSW	0.592684	12
>Cluster-123723.0;orf1 len=1033 frame:2 start:2 end:3100 gi|762085926|ref|XP_011425282.1| PREDICTED: mucin-17-like [Crassostrea gigas] >Cluster-123723.3;orf1 len=1033 frame:2 start:2 end:3100 gi|762085926|ref|XP_011425282.1| PREDICTED: mucin-17-like [Crassostrea gigas] >Cluster-123723.1;orf2 len=1033 frame:2 start:2 end:3100 gi|762085926|ref|XP_011425282.1| PREDICTED: mucin-17-like [Crassostrea g…	1431.66	1432.56	58	70	CNVTEHSTVTRNA	0.0730768	13
>Cluster-123723.0;orf1 len=1033 frame:2 start:2 end:3100 gi|762085926|ref|XP_011425282.1| PREDICTED: mucin-17-like [Crassostrea gigas] >Cluster-123723.3;orf1 len=1033 frame:2 start:2 end:3100 gi|762085926|ref|XP_011425282.1| PREDICTED: mucin-17-like [Crassostrea gigas] >Cluster-123723.1;orf2 len=1033 frame:2 start:2 end:3100 gi|762085926|ref|XP_011425282.1| PREDICTED: mucin-17-like [Crassostrea g…	1475.66	1476.61	743	755	EQVEETDVDPCVI	0.0890703	13
>Cluster-123723.0;orf1 len=1033 frame:2 start:2 end:3100 gi|762085926|ref|XP_011425282.1| PREDICTED: mucin-17-like [Crassostrea gigas] >Cluster-123723.3;orf1 len=1033 frame:2 start:2 end:3100 gi|762085926|ref|XP_011425282.1| PREDICTED: mucin-17-like [Crassostrea gigas] >Cluster-123723.1;orf2 len=1033 frame:2 start:2 end:3100 gi|762085926|ref|XP_011425282.1| PREDICTED: mucin-17-like [Crassostrea g…	2175.93	2177.52	124	142	CKNEGTCVQPNKCQCTEKY	0.419983	19
>Cluster-58773.115194;orf1 len=740 frame:1 start:1 end:2220 gi|676478548|ref|XP_009061463.1| hypothetical protein LOTGIDRAFT_234865 [Lottia gigantea]>gi|556099207|gb|ESO87859.1| hypothetical protein LOTGIDRAFT_234865 [Lottia gigantea]	807.384	807.84	669	676	SSSDGKNL	0.345565	8
>Cluster-58773.115194;orf1 len=740 frame:1 start:1 end:2220 gi|676478548|ref|XP_009061463.1| hypothetical protein LOTGIDRAFT_234865 [Lottia gigantea]>gi|556099207|gb|ESO87859.1| hypothetical protein LOTGIDRAFT_234865 [Lottia gigantea]	821.415	821.914	301	307	TRPSDVF	0.350937	7
>Cluster-58773.115194;orf1 len=740 frame:1 start:1 end:2220 gi|676478548|ref|XP_009061463.1| hypothetical protein LOTGIDRAFT_234865 [Lottia gigantea]>gi|556099207|gb|ESO87859.1| hypothetical protein LOTGIDRAFT_234865 [Lottia gigantea]	821.419	821.977	404	411	KCVKGTDA	0.0993981	8
>Cluster-58773.115194;orf1 len=740 frame:1 start:1 end:2220 gi|676478548|ref|XP_009061463.1| hypothetical protein LOTGIDRAFT_234865 [Lottia gigantea]>gi|556099207|gb|ESO87859.1| hypothetical protein LOTGIDRAFT_234865 [Lottia gigantea]	831.366	831.928	368	374	HTCKDDL	0.216485	7
>Cluster-58773.115194;orf1 len=740 frame:1 start:1 end:2220 gi|676478548|ref|XP_009061463.1| hypothetical protein LOTGIDRAFT_234865 [Lottia gigantea]>gi|556099207|gb|ESO87859.1| hypothetical protein LOTGIDRAFT_234865 [Lottia gigantea]	836.4	836.879	659	666	GSSETKDL	0.200465	8
>Cluster-58773.115194;orf1 len=740 frame:1 start:1 end:2220 gi|676478548|ref|XP_009061463.1| hypothetical protein LOTGIDRAFT_234865 [Lottia gigantea]>gi|556099207|gb|ESO87859.1| hypothetical protein LOTGIDRAFT_234865 [Lottia gigantea]	870.384	870.896	346	352	KETSENY	0.0418098	7
>Cluster-58773.115194;orf1 len=740 frame:1 start:1 end:2220 gi|676478548|ref|XP_009061463.1| hypothetical protein LOTGIDRAFT_234865 [Lottia gigantea]>gi|556099207|gb|ESO87859.1| hypothetical protein LOTGIDRAFT_234865 [Lottia gigantea]	916.583	917.143	468	475	VVKKDSKL	0.0722565	8
>Cluster-58773.115194;orf1 len=740 frame:1 start:1 end:2220 gi|676478548|ref|XP_009061463.1| hypothetical protein LOTGIDRAFT_234865 [Lottia gigantea]>gi|556099207|gb|ESO87859.1| hypothetical protein LOTGIDRAFT_234865 [Lottia gigantea]	945.584	946.144	416	423	RKVTDKKA	0.0560335	8
>Cluster-58773.115194;orf1 len=740 frame:1 start:1 end:2220 gi|676478548|ref|XP_009061463.1| hypothetical protein LOTGIDRAFT_234865 [Lottia gigantea]>gi|556099207|gb|ESO87859.1| hypothetical protein LOTGIDRAFT_234865 [Lottia gigantea]	949.404	950.021	76	84	GKGNECDNL	0.273924	9
>Cluster-58773.115194;orf1 len=740 frame:1 start:1 end:2220 gi|676478548|ref|XP_009061463.1| hypothetical protein LOTGIDRAFT_234865 [Lottia gigantea]>gi|556099207|gb|ESO87859.1| hypothetical protein LOTGIDRAFT_234865 [Lottia gigantea]	963.493	964.135	437	444	KNDDKCKI	0.284942	8
>Cluster-58773.115194;orf1 len=740 frame:1 start:1 end:2220 gi|676478548|ref|XP_009061463.1| hypothetical protein LOTGIDRAFT_234865 [Lottia gigantea]>gi|556099207|gb|ESO87859.1| hypothetical protein LOTGIDRAFT_234865 [Lottia gigantea]	1023.39	1024.12	549	558	CPNDGKECSA	0.354229	10
>Cluster-58773.115194;orf1 len=740 frame:1 start:1 end:2220 gi|676478548|ref|XP_009061463.1| hypothetical protein LOTGIDRAFT_234865 [Lottia gigantea]>gi|556099207|gb|ESO87859.1| hypothetical protein LOTGIDRAFT_234865 [Lottia gigantea]	1051.37	1052.13	238	247	CTDCSTTSSF	0.224019	10
>Cluster-58773.115194;orf1 len=740 frame:1 start:1 end:2220 gi|676478548|ref|XP_009061463.1| hypothetical protein LOTGIDRAFT_234865 [Lottia gigantea]>gi|556099207|gb|ESO87859.1| hypothetical protein LOTGIDRAFT_234865 [Lottia gigantea]	1062.51	1063.12	534	543	KNNPNHGNPA	0.248937	10
>Cluster-58773.115194;orf1 len=740 frame:1 start:1 end:2220 gi|676478548|ref|XP_009061463.1| hypothetical protein LOTGIDRAFT_234865 [Lottia gigantea]>gi|556099207|gb|ESO87859.1| hypothetical protein LOTGIDRAFT_234865 [Lottia gigantea]	1074.54	1075.24	167	176	KDKKSCHTGA	0.244223	10
>Cluster-58773.115194;orf1 len=740 frame:1 start:1 end:2220 gi|676478548|ref|XP_009061463.1| hypothetical protein LOTGIDRAFT_234865 [Lottia gigantea]>gi|556099207|gb|ESO87859.1| hypothetical protein LOTGIDRAFT_234865 [Lottia gigantea]	1204.59	1205.38	308	318	VTSPEMENGKL	0.25483	11
>Cluster-58773.115194;orf1 len=740 frame:1 start:1 end:2220 gi|676478548|ref|XP_009061463.1| hypothetical protein LOTGIDRAFT_234865 [Lottia gigantea]>gi|556099207|gb|ESO87859.1| hypothetical protein LOTGIDRAFT_234865 [Lottia gigantea]	1220.58	1221.38	308	318	VTSPEMENGKL	0.25483	11
>Cluster-58773.115194;orf1 len=740 frame:1 start:1 end:2220 gi|676478548|ref|XP_009061463.1| hypothetical protein LOTGIDRAFT_234865 [Lottia gigantea]>gi|556099207|gb|ESO87859.1| hypothetical protein LOTGIDRAFT_234865 [Lottia gigantea]	1265.56	1266.31	591	601	ESTDGKGKEEW	0.113087	11
>Cluster-58773.115194;orf1 len=740 frame:1 start:1 end:2220 gi|676478548|ref|XP_009061463.1| hypothetical protein LOTGIDRAFT_234865 [Lottia gigantea]>gi|556099207|gb|ESO87859.1| hypothetical protein LOTGIDRAFT_234865 [Lottia gigantea]	1326.56	1327.42	283	294	CPDGSVKNQSEY	0.145671	12
>Cluster-58773.115194;orf1 len=740 frame:1 start:1 end:2220 gi|676478548|ref|XP_009061463.1| hypothetical protein LOTGIDRAFT_234865 [Lottia gigantea]>gi|556099207|gb|ESO87859.1| hypothetical protein LOTGIDRAFT_234865 [Lottia gigantea]	1367.56	1368.43	614	625	CSDGSRESVQNW	0.344	12
>Cluster-58773.115194;orf1 len=740 frame:1 start:1 end:2220 gi|676478548|ref|XP_009061463.1| hypothetical protein LOTGIDRAFT_234865 [Lottia gigantea]>gi|556099207|gb|ESO87859.1| hypothetical protein LOTGIDRAFT_234865 [Lottia gigantea]	1587.67	1588.83	377	390	CTVSDEEMKKCSDL	0.257001	14
>Cluster-58773.115194;orf1 len=740 frame:1 start:1 end:2220 gi|676478548|ref|XP_009061463.1| hypothetical protein LOTGIDRAFT_234865 [Lottia gigantea]>gi|556099207|gb|ESO87859.1| hypothetical protein LOTGIDRAFT_234865 [Lottia gigantea]	1603.66	1604.83	377	390	CTVSDEEMKKCSDL	0.257001	14
>Cluster-58773.115194;orf1 len=740 frame:1 start:1 end:2220 gi|676478548|ref|XP_009061463.1| hypothetical protein LOTGIDRAFT_234865 [Lottia gigantea]>gi|556099207|gb|ESO87859.1| hypothetical protein LOTGIDRAFT_234865 [Lottia gigantea]	2295.08	2296.66	103	123	RCMQMVKNGEVDVVGVSDTDL	0.339515	21
>Cluster-58773.115194;orf1 len=740 frame:1 start:1 end:2220 gi|676478548|ref|XP_009061463.1| hypothetical protein LOTGIDRAFT_234865 [Lottia gigantea]>gi|556099207|gb|ESO87859.1| hypothetical protein LOTGIDRAFT_234865 [Lottia gigantea]	2311.07	2312.66	103	123	RCMQMVKNGEVDVVGVSDTDL	0.339515	21
>Cluster-58773.115194;orf1 len=740 frame:1 start:1 end:2220 gi|676478548|ref|XP_009061463.1| hypothetical protein LOTGIDRAFT_234865 [Lottia gigantea]>gi|556099207|gb|ESO87859.1| hypothetical protein LOTGIDRAFT_234865 [Lottia gigantea]	2327.07	2328.66	103	123	RCMQMVKNGEVDVVGVSDTDL	0.339515	21
>Cluster-58773.181383;orf1 len=2076 frame:2 start:398 end:6625 gi|762115637|ref|XP_011440628.1| PREDICTED: uncharacterized protein LOC105337560 isoform X1 [Crassostrea gigas]	818.4	818.867	1876	1882	NRDDVSI	0.102037	7
>Cluster-58773.181383;orf1 len=2076 frame:2 start:398 end:6625 gi|762115637|ref|XP_011440628.1| PREDICTED: uncharacterized protein LOC105337560 isoform X1 [Crassostrea gigas]	824.426	824.917	148	154	KQNKGSY	0.109075	7
>Cluster-58773.181383;orf1 len=2076 frame:2 start:398 end:6625 gi|762115637|ref|XP_011440628.1| PREDICTED: uncharacterized protein LOC105337560 isoform X1 [Crassostrea gigas]	825.447	825.946	963	969	QKDKPNL	0.305069	7
>Cluster-58773.181383;orf1 len=2076 frame:2 start:398 end:6625 gi|762115637|ref|XP_011440628.1| PREDICTED: uncharacterized protein LOC105337560 isoform X1 [Crassostrea gigas]	828.385	829.037	159	164	RQMCKY	0.489757	6
>Cluster-58773.181383;orf1 len=2076 frame:2 start:398 end:6625 gi|762115637|ref|XP_011440628.1| PREDICTED: uncharacterized protein LOC105337560 isoform X1 [Crassostrea gigas]	834.348	834.819	1830	1836	TDNQEDI	0.0555589	7
>Cluster-58773.181383;orf1 len=2076 frame:2 start:398 end:6625 gi|762115637|ref|XP_011440628.1| PREDICTED: uncharacterized protein LOC105337560 isoform X1 [Crassostrea gigas]	837.381	837.976	723	729	EEGKPMF	0.535047	7
>Cluster-58773.181383;orf1 len=2076 frame:2 start:398 end:6625 gi|762115637|ref|XP_011440628.1| PREDICTED: uncharacterized protein LOC105337560 isoform X1 [Crassostrea gigas]	839.521	840.022	437	443	THKRGKI	0.100316	7
>Cluster-58773.181383;orf1 len=2076 frame:2 start:398 end:6625 gi|762115637|ref|XP_011440628.1| PREDICTED: uncharacterized protein LOC105337560 isoform X1 [Crassostrea gigas]	842.473	842.976	963	969	QKDKPNL	0.305069	7
>Cluster-58773.181383;orf1 len=2076 frame:2 start:398 end:6625 gi|762115637|ref|XP_011440628.1| PREDICTED: uncharacterized protein LOC105337560 isoform X1 [Crassostrea gigas]	844.38	845.036	159	164	RQMCKY	0.489757	6
>Cluster-58773.181383;orf1 len=2076 frame:2 start:398 end:6625 gi|762115637|ref|XP_011440628.1| PREDICTED: uncharacterized protein LOC105337560 isoform X1 [Crassostrea gigas]	847.379	847.862	228	236	DDGTGSKPA	0.143929	9
>Cluster-58773.181383;orf1 len=2076 frame:2 start:398 end:6625 gi|762115637|ref|XP_011440628.1| PREDICTED: uncharacterized protein LOC105337560 isoform X1 [Crassostrea gigas]	853.376	853.975	723	729	EEGKPMF	0.535047	7
>Cluster-58773.181383;orf1 len=2076 frame:2 start:398 end:6625 gi|762115637|ref|XP_011440628.1| PREDICTED: uncharacterized protein LOC105337560 isoform X1 [Crassostrea gigas]	857.448	857.947	52	59	PRDDKGGI	0.388875	8
>Cluster-58773.181383;orf1 len=2076 frame:2 start:398 end:6625 gi|762115637|ref|XP_011440628.1| PREDICTED: uncharacterized protein LOC105337560 isoform X1 [Crassostrea gigas]	864.41	864.936	1766	1773	SPEQVGTF	0.479088	8
>Cluster-58773.181383;orf1 len=2076 frame:2 start:398 end:6625 gi|762115637|ref|XP_011440628.1| PREDICTED: uncharacterized protein LOC105337560 isoform X1 [Crassostrea gigas]	865.525	866.057	1783	1789	HKDKPKL	0.298874	7
>Cluster-58773.181383;orf1 len=2076 frame:2 start:398 end:6625 gi|762115637|ref|XP_011440628.1| PREDICTED: uncharacterized protein LOC105337560 isoform X1 [Crassostrea gigas]	887.345	887.946	1034	1041	DVCETTGY	0.131177	8
>Cluster-58773.181383;orf1 len=2076 frame:2 start:398 end:6625 gi|762115637|ref|XP_011440628.1| PREDICTED: uncharacterized protein LOC105337560 isoform X1 [Crassostrea gigas]	904.46	904.964	1757	1765	DGGGRSRSL	0.30681	9
>Cluster-58773.181383;orf1 len=2076 frame:2 start:398 end:6625 gi|762115637|ref|XP_011440628.1| PREDICTED: uncharacterized protein LOC105337560 isoform X1 [Crassostrea gigas]	904.5	905.051	492	499	RVPGKGQY	0.177406	8
>Cluster-58773.181383;orf1 len=2076 frame:2 start:398 end:6625 gi|762115637|ref|XP_011440628.1| PREDICTED: uncharacterized protein LOC105337560 isoform X1 [Crassostrea gigas]	921.452	921.985	467	474	TTEDNKTL	0.0514009	8
>Cluster-58773.181383;orf1 len=2076 frame:2 start:398 end:6625 gi|762115637|ref|XP_011440628.1| PREDICTED: uncharacterized protein LOC105337560 isoform X1 [Crassostrea gigas]	935.483	936.059	680	687	PSKDKVDF	0.3654	8
>Cluster-58773.181383;orf1 len=2076 frame:2 start:398 end:6625 gi|762115637|ref|XP_011440628.1| PREDICTED: uncharacterized protein LOC105337560 isoform X1 [Crassostrea gigas]	941.494	942.063	29	36	EKEPTPQL	0.143454	8
>Cluster-58773.181383;orf1 len=2076 frame:2 start:398 end:6625 gi|762115637|ref|XP_011440628.1| PREDICTED: uncharacterized protein LOC105337560 isoform X1 [Crassostrea gigas]	943.423	943.954	1915	1922	ERHSESQA	0.0519527	8
>Cluster-58773.181383;orf1 len=2076 frame:2 start:398 end:6625 gi|762115637|ref|XP_011440628.1| PREDICTED: uncharacterized protein LOC105337560 isoform X1 [Crassostrea gigas]	947.448	948.054	1580	1588	DQMRGGRGA	0.355681	9
>Cluster-58773.181383;orf1 len=2076 frame:2 start:398 end:6625 gi|762115637|ref|XP_011440628.1| PREDICTED: uncharacterized protein LOC105337560 isoform X1 [Crassostrea gigas]	963.442	964.054	1580	1588	DQMRGGRGA	0.355681	9
>Cluster-58773.181383;orf1 len=2076 frame:2 start:398 end:6625 gi|762115637|ref|XP_011440628.1| PREDICTED: uncharacterized protein LOC105337560 isoform X1 [Crassostrea gigas]	971.6	972.183	904	911	KQKNKVNL	0.114507	8
>Cluster-58773.181383;orf1 len=2076 frame:2 start:398 end:6625 gi|762115637|ref|XP_011440628.1| PREDICTED: uncharacterized protein LOC105337560 isoform X1 [Crassostrea gigas]	975.526	976.127	708	715	KKDKDGVW	0.298129	8
>Cluster-58773.181383;orf1 len=2076 frame:2 start:398 end:6625 gi|762115637|ref|XP_011440628.1| PREDICTED: uncharacterized protein LOC105337560 isoform X1 [Crassostrea gigas]	979.476	980.132	751	758	SKEKMDEI	0.0810346	8
>Cluster-58773.181383;orf1 len=2076 frame:2 start:398 end:6625 gi|762115637|ref|XP_011440628.1| PREDICTED: uncharacterized protein LOC105337560 isoform X1 [Crassostrea gigas]	995.471	996.131	751	758	SKEKMDEI	0.0810346	8
>Cluster-58773.181383;orf1 len=2076 frame:2 start:398 end:6625 gi|762115637|ref|XP_011440628.1| PREDICTED: uncharacterized protein LOC105337560 isoform X1 [Crassostrea gigas]	1002.58	1003.16	1021	1028	TRQKDKRA	0.079353	8
>Cluster-58773.181383;orf1 len=2076 frame:2 start:398 end:6625 gi|762115637|ref|XP_011440628.1| PREDICTED: uncharacterized protein LOC105337560 isoform X1 [Crassostrea gigas]	1013.42	1014	1999	2009	NGTTGGGESSF	0.10942	11
>Cluster-58773.181383;orf1 len=2076 frame:2 start:398 end:6625 gi|762115637|ref|XP_011440628.1| PREDICTED: uncharacterized protein LOC105337560 isoform X1 [Crassostrea gigas]	1013.59	1014.18	1255	1262	TKERNRPL	0.115167	8
>Cluster-58773.181383;orf1 len=2076 frame:2 start:398 end:6625 gi|762115637|ref|XP_011440628.1| PREDICTED: uncharacterized protein LOC105337560 isoform X1 [Crassostrea gigas]	1017.53	1018.12	788	795	EEKRKQEA	0.0316266	8
>Cluster-58773.181383;orf1 len=2076 frame:2 start:398 end:6625 gi|762115637|ref|XP_011440628.1| PREDICTED: uncharacterized protein LOC105337560 isoform X1 [Crassostrea gigas]	1027.53	1028.12	865	873	QKRDSRSPA	0.13835	9
>Cluster-58773.181383;orf1 len=2076 frame:2 start:398 end:6625 gi|762115637|ref|XP_011440628.1| PREDICTED: uncharacterized protein LOC105337560 isoform X1 [Crassostrea gigas]	1029.44	1030.04	237	245	KSEDSDVSY	0.0879156	9
>Cluster-58773.181383;orf1 len=2076 frame:2 start:398 end:6625 gi|762115637|ref|XP_011440628.1| PREDICTED: uncharacterized protein LOC105337560 isoform X1 [Crassostrea gigas]	1031.61	1032.23	63	71	PTTKSKKEI	0.0469979	9
>Cluster-58773.181383;orf1 len=2076 frame:2 start:398 end:6625 gi|762115637|ref|XP_011440628.1| PREDICTED: uncharacterized protein LOC105337560 isoform X1 [Crassostrea gigas]	1033.55	1034.23	1429	1437	MREGDKGKL	0.214362	9
>Cluster-58773.181383;orf1 len=2076 frame:2 start:398 end:6625 gi|762115637|ref|XP_011440628.1| PREDICTED: uncharacterized protein LOC105337560 isoform X1 [Crassostrea gigas]	1036.44	1037.14	346	354	QGNVDMDKF	0.530507	9
>Cluster-58773.181383;orf1 len=2076 frame:2 start:398 end:6625 gi|762115637|ref|XP_011440628.1| PREDICTED: uncharacterized protein LOC105337560 isoform X1 [Crassostrea gigas]	1039.52	1040.13	1196	1204	VQHGDKDQL	0.170989	9
>Cluster-58773.181383;orf1 len=2076 frame:2 start:398 end:6625 gi|762115637|ref|XP_011440628.1| PREDICTED: uncharacterized protein LOC105337560 isoform X1 [Crassostrea gigas]	1041.4	1042.01	506	514	KEDDEEGGY	0.115272	9
>Cluster-58773.181383;orf1 len=2076 frame:2 start:398 end:6625 gi|762115637|ref|XP_011440628.1| PREDICTED: uncharacterized protein LOC105337560 isoform X1 [Crassostrea gigas]	1044.55	1045.15	865	873	QKRDSRSPA	0.13835	9
>Cluster-58773.181383;orf1 len=2076 frame:2 start:398 end:6625 gi|762115637|ref|XP_011440628.1| PREDICTED: uncharacterized protein LOC105337560 isoform X1 [Crassostrea gigas]	1047.6	1048.23	1313	1321	VKTKDKSEL	0.0513776	9
>Cluster-58773.181383;orf1 len=2076 frame:2 start:398 end:6625 gi|762115637|ref|XP_011440628.1| PREDICTED: uncharacterized protein LOC105337560 isoform X1 [Crassostrea gigas]	1049.54	1050.23	1429	1437	MREGDKGKL	0.214362	9
>Cluster-58773.181383;orf1 len=2076 frame:2 start:398 end:6625 gi|762115637|ref|XP_011440628.1| PREDICTED: uncharacterized protein LOC105337560 isoform X1 [Crassostrea gigas]	1052.44	1053.14	346	354	QGNVDMDKF	0.530507	9
>Cluster-58773.181383;orf1 len=2076 frame:2 start:398 end:6625 gi|762115637|ref|XP_011440628.1| PREDICTED: uncharacterized protein LOC105337560 isoform X1 [Crassostrea gigas]	1053.47	1054.17	346	354	QGNVDMDKF	0.530507	9
>Cluster-58773.181383;orf1 len=2076 frame:2 start:398 end:6625 gi|762115637|ref|XP_011440628.1| PREDICTED: uncharacterized protein LOC105337560 isoform X1 [Crassostrea gigas]	1054.54	1055.19	415	422	PQNPRKEW	0.508385	8
>Cluster-58773.181383;orf1 len=2076 frame:2 start:398 end:6625 gi|762115637|ref|XP_011440628.1| PREDICTED: uncharacterized protein LOC105337560 isoform X1 [Crassostrea gigas]	1063.56	1064.26	39	47	EVQRKCSTL	0.110388	9
>Cluster-58773.181383;orf1 len=2076 frame:2 start:398 end:6625 gi|762115637|ref|XP_011440628.1| PREDICTED: uncharacterized protein LOC105337560 isoform X1 [Crassostrea gigas]	1069.46	1070.17	346	354	QGNVDMDKF	0.530507	9
>Cluster-58773.181383;orf1 len=2076 frame:2 start:398 end:6625 gi|762115637|ref|XP_011440628.1| PREDICTED: uncharacterized protein LOC105337560 isoform X1 [Crassostrea gigas]	1073.45	1074.23	1973	1981	MNRSGQMSY	0.210602	9
>Cluster-58773.181383;orf1 len=2076 frame:2 start:398 end:6625 gi|762115637|ref|XP_011440628.1| PREDICTED: uncharacterized protein LOC105337560 isoform X1 [Crassostrea gigas]	1075.47	1076.29	299	307	SMTVMSHPW	0.392963	9
>Cluster-58773.181383;orf1 len=2076 frame:2 start:398 end:6625 gi|762115637|ref|XP_011440628.1| PREDICTED: uncharacterized protein LOC105337560 isoform X1 [Crassostrea gigas]	1077.52	1078.24	807	815	MEDGEKKQI	0.0675254	9
>Cluster-58773.181383;orf1 len=2076 frame:2 start:398 end:6625 gi|762115637|ref|XP_011440628.1| PREDICTED: uncharacterized protein LOC105337560 isoform X1 [Crassostrea gigas]	1084.57	1085.32	6	14	KMVVTKSEY	0.0433117	9
>Cluster-58773.181383;orf1 len=2076 frame:2 start:398 end:6625 gi|762115637|ref|XP_011440628.1| PREDICTED: uncharacterized protein LOC105337560 isoform X1 [Crassostrea gigas]	1087.55	1088.17	1641	1652	GGGRGGSKSPDI	0.299449	12
>Cluster-58773.181383;orf1 len=2076 frame:2 start:398 end:6625 gi|762115637|ref|XP_011440628.1| PREDICTED: uncharacterized protein LOC105337560 isoform X1 [Crassostrea gigas]	1089.45	1090.23	1973	1981	MNRSGQMSY	0.210602	9
>Cluster-58773.181383;orf1 len=2076 frame:2 start:398 end:6625 gi|762115637|ref|XP_011440628.1| PREDICTED: uncharacterized protein LOC105337560 isoform X1 [Crassostrea gigas]	1091.46	1092.29	299	307	SMTVMSHPW	0.392963	9
>Cluster-58773.181383;orf1 len=2076 frame:2 start:398 end:6625 gi|762115637|ref|XP_011440628.1| PREDICTED: uncharacterized protein LOC105337560 isoform X1 [Crassostrea gigas]	1091.58	1092.31	562	571	MVTVDKTGQL	0.0807318	10
>Cluster-58773.181383;orf1 len=2076 frame:2 start:398 end:6625 gi|762115637|ref|XP_011440628.1| PREDICTED: uncharacterized protein LOC105337560 isoform X1 [Crassostrea gigas]	1093.52	1094.24	807	815	MEDGEKKQI	0.0675254	9
>Cluster-58773.181383;orf1 len=2076 frame:2 start:398 end:6625 gi|762115637|ref|XP_011440628.1| PREDICTED: uncharacterized protein LOC105337560 isoform X1 [Crassostrea gigas]	1100.57	1101.31	6	14	KMVVTKSEY	0.0433117	9
>Cluster-58773.181383;orf1 len=2076 frame:2 start:398 end:6625 gi|762115637|ref|XP_011440628.1| PREDICTED: uncharacterized protein LOC105337560 isoform X1 [Crassostrea gigas]	1105.44	1106.23	1973	1981	MNRSGQMSY	0.210602	9
>Cluster-58773.181383;orf1 len=2076 frame:2 start:398 end:6625 gi|762115637|ref|XP_011440628.1| PREDICTED: uncharacterized protein LOC105337560 isoform X1 [Crassostrea gigas]	1107.46	1108.29	299	307	SMTVMSHPW	0.392963	9
>Cluster-58773.181383;orf1 len=2076 frame:2 start:398 end:6625 gi|762115637|ref|XP_011440628.1| PREDICTED: uncharacterized protein LOC105337560 isoform X1 [Crassostrea gigas]	1107.57	1108.31	562	571	MVTVDKTGQL	0.0807318	10
>Cluster-58773.181383;orf1 len=2076 frame:2 start:398 end:6625 gi|762115637|ref|XP_011440628.1| PREDICTED: uncharacterized protein LOC105337560 isoform X1 [Crassostrea gigas]	1117.63	1118.35	797	804	EKRRRMEL	0.138032	8
>Cluster-58773.181383;orf1 len=2076 frame:2 start:398 end:6625 gi|762115637|ref|XP_011440628.1| PREDICTED: uncharacterized protein LOC105337560 isoform X1 [Crassostrea gigas]	1133.62	1134.35	797	804	EKRRRMEL	0.138032	8
>Cluster-58773.181383;orf1 len=2076 frame:2 start:398 end:6625 gi|762115637|ref|XP_011440628.1| PREDICTED: uncharacterized protein LOC105337560 isoform X1 [Crassostrea gigas]	1134.59	1135.34	1079	1087	MTEKDKRNL	0.106692	9
>Cluster-58773.181383;orf1 len=2076 frame:2 start:398 end:6625 gi|762115637|ref|XP_011440628.1| PREDICTED: uncharacterized protein LOC105337560 isoform X1 [Crassostrea gigas]	1146.55	1147.2	1175	1187	GGGSRGGSKSPEA	0.223934	13
>Cluster-58773.181383;orf1 len=2076 frame:2 start:398 end:6625 gi|762115637|ref|XP_011440628.1| PREDICTED: uncharacterized protein LOC105337560 isoform X1 [Crassostrea gigas]	1150.59	1151.33	1079	1087	MTEKDKRNL	0.106692	9
>Cluster-58773.181383;orf1 len=2076 frame:2 start:398 end:6625 gi|762115637|ref|XP_011440628.1| PREDICTED: uncharacterized protein LOC105337560 isoform X1 [Crassostrea gigas]	1155.48	1156.15	592	601	DGNVEDKSEY	0.0693514	10
>Cluster-58773.181383;orf1 len=2076 frame:2 start:398 end:6625 gi|762115637|ref|XP_011440628.1| PREDICTED: uncharacterized protein LOC105337560 isoform X1 [Crassostrea gigas]	1160.54	1161.22	1351	1363	GGGSGDVVPSDTL	0.277121	13
>Cluster-58773.181383;orf1 len=2076 frame:2 start:398 end:6625 gi|762115637|ref|XP_011440628.1| PREDICTED: uncharacterized protein LOC105337560 isoform X1 [Crassostrea gigas]	1176.59	1177.26	1963	1972	TRNTTDEVQL	0.0324756	10
>Cluster-58773.181383;orf1 len=2076 frame:2 start:398 end:6625 gi|762115637|ref|XP_011440628.1| PREDICTED: uncharacterized protein LOC105337560 isoform X1 [Crassostrea gigas]	1177.59	1178.25	1933	1943	SNSDGSSRRVL	0.456692	11
>Cluster-58773.181383;orf1 len=2076 frame:2 start:398 end:6625 gi|762115637|ref|XP_011440628.1| PREDICTED: uncharacterized protein LOC105337560 isoform X1 [Crassostrea gigas]	1182.53	1183.29	1464	1474	EDMKQSSTGSI	0.107621	11
>Cluster-58773.181383;orf1 len=2076 frame:2 start:398 end:6625 gi|762115637|ref|XP_011440628.1| PREDICTED: uncharacterized protein LOC105337560 isoform X1 [Crassostrea gigas]	1182.53	1183.3	1883	1892	DSRTSSRMGW	0.541169	10
>Cluster-58773.181383;orf1 len=2076 frame:2 start:398 end:6625 gi|762115637|ref|XP_011440628.1| PREDICTED: uncharacterized protein LOC105337560 isoform X1 [Crassostrea gigas]	1188.6	1189.28	1409	1421	GGGRGGSKTPDSL	0.328955	13
>Cluster-58773.181383;orf1 len=2076 frame:2 start:398 end:6625 gi|762115637|ref|XP_011440628.1| PREDICTED: uncharacterized protein LOC105337560 isoform X1 [Crassostrea gigas]	1190.62	1191.3	881	892	GRPSSTRGSKSA	0.17198	12
>Cluster-58773.181383;orf1 len=2076 frame:2 start:398 end:6625 gi|762115637|ref|XP_011440628.1| PREDICTED: uncharacterized protein LOC105337560 isoform X1 [Crassostrea gigas]	1198.53	1199.29	1464	1474	EDMKQSSTGSI	0.107621	11
>Cluster-58773.181383;orf1 len=2076 frame:2 start:398 end:6625 gi|762115637|ref|XP_011440628.1| PREDICTED: uncharacterized protein LOC105337560 isoform X1 [Crassostrea gigas]	1198.53	1199.3	1883	1892	DSRTSSRMGW	0.541169	10
>Cluster-58773.181383;orf1 len=2076 frame:2 start:398 end:6625 gi|762115637|ref|XP_011440628.1| PREDICTED: uncharacterized protein LOC105337560 isoform X1 [Crassostrea gigas]	1220.58	1221.27	384	394	GRDTNETDTVL	0.0845198	11
>Cluster-58773.181383;orf1 len=2076 frame:2 start:398 end:6625 gi|762115637|ref|XP_011440628.1| PREDICTED: uncharacterized protein LOC105337560 isoform X1 [Crassostrea gigas]	1225.7	1226.43	336	345	RSTKVEHKQI	0.0457109	10
>Cluster-58773.181383;orf1 len=2076 frame:2 start:398 end:6625 gi|762115637|ref|XP_011440628.1| PREDICTED: uncharacterized protein LOC105337560 isoform X1 [Crassostrea gigas]	1250.59	1251.34	444	454	NVDDGEVEVKF	0.12213	11
>Cluster-58773.181383;orf1 len=2076 frame:2 start:398 end:6625 gi|762115637|ref|XP_011440628.1| PREDICTED: uncharacterized protein LOC105337560 isoform X1 [Crassostrea gigas]	1261.6	1262.5	404	414	CETPKTNCRPL	0.634313	11
>Cluster-58773.181383;orf1 len=2076 frame:2 start:398 end:6625 gi|762115637|ref|XP_011440628.1| PREDICTED: uncharacterized protein LOC105337560 isoform X1 [Crassostrea gigas]	1272.67	1273.51	774	783	HERTKMKETL	0.0857774	10
>Cluster-58773.181383;orf1 len=2076 frame:2 start:398 end:6625 gi|762115637|ref|XP_011440628.1| PREDICTED: uncharacterized protein LOC105337560 isoform X1 [Crassostrea gigas]	1288.67	1289.51	774	783	HERTKMKETL	0.0857774	10
>Cluster-58773.181383;orf1 len=2076 frame:2 start:398 end:6625 gi|762115637|ref|XP_011440628.1| PREDICTED: uncharacterized protein LOC105337560 isoform X1 [Crassostrea gigas]	1352.57	1353.31	2032	2044	SRESSQGSDNTNA	0.100772	13
>Cluster-58773.181383;orf1 len=2076 frame:2 start:398 end:6625 gi|762115637|ref|XP_011440628.1| PREDICTED: uncharacterized protein LOC105337560 isoform X1 [Crassostrea gigas]	1432.72	1433.57	213	224	SRQVVTQDKGEW	0.131191	12
>Cluster-58773.181383;orf1 len=2076 frame:2 start:398 end:6625 gi|762115637|ref|XP_011440628.1| PREDICTED: uncharacterized protein LOC105337560 isoform X1 [Crassostrea gigas]	1605.89	1606.84	1234	1247	REKHRPGSRSPVSL	0.205477	14
>Cluster-58773.181383;orf1 len=2076 frame:2 start:398 end:6625 gi|762115637|ref|XP_011440628.1| PREDICTED: uncharacterized protein LOC105337560 isoform X1 [Crassostrea gigas]	1888.78	1890.03	2010	2026	GETHSMSQMSGTSRTEY	0.0589611	17
>Cluster-58773.181383;orf1 len=2076 frame:2 start:398 end:6625 gi|762115637|ref|XP_011440628.1| PREDICTED: uncharacterized protein LOC105337560 isoform X1 [Crassostrea gigas]	1904.77	1906.03	2010	2026	GETHSMSQMSGTSRTEY	0.0589611	17
>Cluster-58773.181383;orf1 len=2076 frame:2 start:398 end:6625 gi|762115637|ref|XP_011440628.1| PREDICTED: uncharacterized protein LOC105337560 isoform X1 [Crassostrea gigas]	1920.77	1922.03	2010	2026	GETHSMSQMSGTSRTEY	0.0589611	17
>Cluster-58773.181383;orf1 len=2076 frame:2 start:398 end:6625 gi|762115637|ref|XP_011440628.1| PREDICTED: uncharacterized protein LOC105337560 isoform X1 [Crassostrea gigas]	2029.02	2030.18	2049	2067	TERHSTTSSVRSVNRSGPA	0.0494881	19
>Cluster-58773.181383;orf1 len=2076 frame:2 start:398 end:6625 gi|762115637|ref|XP_011440628.1| PREDICTED: uncharacterized protein LOC105337560 isoform X1 [Crassostrea gigas]	2373.28	2374.68	839	856	EEERKKREEDRKKKDEKI	0.0987802	18
>tr|A0A7E6FLI0|A0A7E6FLI0_OCTVU intermediate filament protein ifa-4-like OS=Octopus vulgaris OX=6645 GN=LOC118767372 PE=4 SV=1	845.411	845.893	41	48	QSSQRSVA	0.136888	8
>tr|A0A7E6FLI0|A0A7E6FLI0_OCTVU intermediate filament protein ifa-4-like OS=Octopus vulgaris OX=6645 GN=LOC118767372 PE=4 SV=1	862.368	862.871	134	140	EEEVEDL	0.0402779	7
>tr|A0A7E6FLI0|A0A7E6FLI0_OCTVU intermediate filament protein ifa-4-like OS=Octopus vulgaris OX=6645 GN=LOC118767372 PE=4 SV=1	862.438	862.923	41	48	QSSQRSVA	0.136888	8
>tr|A0A7E6FLI0|A0A7E6FLI0_OCTVU intermediate filament protein ifa-4-like OS=Octopus vulgaris OX=6645 GN=LOC118767372 PE=4 SV=1	875.44	876.028	19	26	PGQSRMSI	0.361738	8
>tr|A0A7E6FLI0|A0A7E6FLI0_OCTVU intermediate filament protein ifa-4-like OS=Octopus vulgaris OX=6645 GN=LOC118767372 PE=4 SV=1	876.431	876.944	117	123	EDKDKEL	0.0872635	7
>tr|A0A7E6FLI0|A0A7E6FLI0_OCTVU intermediate filament protein ifa-4-like OS=Octopus vulgaris OX=6645 GN=LOC118767372 PE=4 SV=1	879.432	879.953	90	96	NRSQVEF	0.234599	7
>tr|A0A7E6FLI0|A0A7E6FLI0_OCTVU intermediate filament protein ifa-4-like OS=Octopus vulgaris OX=6645 GN=LOC118767372 PE=4 SV=1	891.435	892.028	19	26	PGQSRMSI	0.361738	8
>tr|A0A7E6FLI0|A0A7E6FLI0_OCTVU intermediate filament protein ifa-4-like OS=Octopus vulgaris OX=6645 GN=LOC118767372 PE=4 SV=1	904.51	905.045	126	133	VKSKNESL	0.068962	8
>tr|A0A7E6FLI0|A0A7E6FLI0_OCTVU intermediate filament protein ifa-4-like OS=Octopus vulgaris OX=6645 GN=LOC118767372 PE=4 SV=1	962.52	963.154	204	211	RTVRCNTL	0.106673	8
>tr|A0A7E6FLI0|A0A7E6FLI0_OCTVU intermediate filament protein ifa-4-like OS=Octopus vulgaris OX=6645 GN=LOC118767372 PE=4 SV=1	1314.69	1315.44	145	154	RQVQDERDRL	0.207396	10
>tr|A0A7E6FLI0|A0A7E6FLI0_OCTVU intermediate filament protein ifa-4-like OS=Octopus vulgaris OX=6645 GN=LOC118767372 PE=4 SV=1	1436.71	1437.52	171	182	DSETSRRRTSEL	0.0854451	12
>tr|A0A7E6FLI0|A0A7E6FLI0_OCTVU intermediate filament protein ifa-4-like OS=Octopus vulgaris OX=6645 GN=LOC118767372 PE=4 SV=1	1564.8	1565.8	49	61	EMKNSSQKEKKDL	0.0924824	13
>tr|A0A7E6FLI0|A0A7E6FLI0_OCTVU intermediate filament protein ifa-4-like OS=Octopus vulgaris OX=6645 GN=LOC118767372 PE=4 SV=1	1580.79	1581.8	49	61	EMKNSSQKEKKDL	0.0924824	13
>tr|A0A7E6FLI0|A0A7E6FLI0_OCTVU intermediate filament protein ifa-4-like OS=Octopus vulgaris OX=6645 GN=LOC118767372 PE=4 SV=1	1755.04	1756.04	6	18	RRRNRRTSVRREI	0.0525465	13
>Cluster-58773.164160;orf1 len=408 frame:3 start:3 end:1226 gi|405966888|gb|EKC32120.1| Collagen alpha-3(VI) chain [Crassostrea gigas]	806.269	806.894	39	45	DCSTSMY	0.406618	7
>Cluster-58773.164160;orf1 len=408 frame:3 start:3 end:1226 gi|405966888|gb|EKC32120.1| Collagen alpha-3(VI) chain [Crassostrea gigas]	814.395	814.884	107	113	GGRTHTW	0.436727	7
>Cluster-58773.164160;orf1 len=408 frame:3 start:3 end:1226 gi|405966888|gb|EKC32120.1| Collagen alpha-3(VI) chain [Crassostrea gigas]	822.264	822.893	39	45	DCSTSMY	0.406618	7
>Cluster-58773.164160;orf1 len=408 frame:3 start:3 end:1226 gi|405966888|gb|EKC32120.1| Collagen alpha-3(VI) chain [Crassostrea gigas]	833.411	833.881	125	132	TTDNGGRI	0.106043	8
>Cluster-58773.164160;orf1 len=408 frame:3 start:3 end:1226 gi|405966888|gb|EKC32120.1| Collagen alpha-3(VI) chain [Crassostrea gigas]	912.431	912.978	78	85	STTVQTEF	0.0901766	8
>Cluster-58773.164160;orf1 len=408 frame:3 start:3 end:1226 gi|405966888|gb|EKC32120.1| Collagen alpha-3(VI) chain [Crassostrea gigas]	932.421	932.965	172	180	GPSVDTDEL	0.212753	9
>Cluster-58773.164160;orf1 len=408 frame:3 start:3 end:1226 gi|405966888|gb|EKC32120.1| Collagen alpha-3(VI) chain [Crassostrea gigas]	1021.52	1022.12	316	325	NGGRDGVPHI	0.275868	10
>Cluster-58773.164160;orf1 len=408 frame:3 start:3 end:1226 gi|405966888|gb|EKC32120.1| Collagen alpha-3(VI) chain [Crassostrea gigas]	1046.6	1047.31	396	404	TKVCRVEVI	0.0468976	9
>Cluster-58773.164160;orf1 len=408 frame:3 start:3 end:1226 gi|405966888|gb|EKC32120.1| Collagen alpha-3(VI) chain [Crassostrea gigas]	1054.54	1055.25	213	222	KVCGVHPSDI	0.164542	10
>Cluster-58773.164160;orf1 len=408 frame:3 start:3 end:1226 gi|405966888|gb|EKC32120.1| Collagen alpha-3(VI) chain [Crassostrea gigas]	1271.54	1272.24	292	303	NRNHGDTNTGDA	0.0760476	12
>Cluster-58773.164160;orf1 len=408 frame:3 start:3 end:1226 gi|405966888|gb|EKC32120.1| Collagen alpha-3(VI) chain [Crassostrea gigas]	1277.67	1278.41	142	153	TDGGSNEKKKTI	0.0974076	12
>tr|A0A6P7TER7|A0A6P7TER7_OCTVU myosin heavy chain, non-muscle isoform X3 OS=Octopus vulgaris OX=6645 GN=LOC115222368 PE=3 SV=1	806.371	806.918	90	96	NKVEDMA	0.0876422	7
>tr|A0A6P7TER7|A0A6P7TER7_OCTVU myosin heavy chain, non-muscle isoform X3 OS=Octopus vulgaris OX=6645 GN=LOC115222368 PE=3 SV=1	806.425	806.896	1391	1397	KKTTEEA	0.0213319	7
>tr|A0A6P7TER7|A0A6P7TER7_OCTVU myosin heavy chain, non-muscle isoform X3 OS=Octopus vulgaris OX=6645 GN=LOC115222368 PE=3 SV=1	815.485	815.956	1183	1188	RNKREL	0.119562	6
>tr|A0A6P7TER7|A0A6P7TER7_OCTVU myosin heavy chain, non-muscle isoform X3 OS=Octopus vulgaris OX=6645 GN=LOC115222368 PE=3 SV=1	816.373	816.848	356	363	SPDDVNGI	0.469473	8
>tr|A0A6P7TER7|A0A6P7TER7_OCTVU myosin heavy chain, non-muscle isoform X3 OS=Octopus vulgaris OX=6645 GN=LOC115222368 PE=3 SV=1	819.421	819.895	1651	1657	TKQKEDA	0.0318104	7
>tr|A0A6P7TER7|A0A6P7TER7_OCTVU myosin heavy chain, non-muscle isoform X3 OS=Octopus vulgaris OX=6645 GN=LOC115222368 PE=3 SV=1	819.457	819.939	1493	1499	NEKSTKI	0.0602341	7
>tr|A0A6P7TER7|A0A6P7TER7_OCTVU myosin heavy chain, non-muscle isoform X3 OS=Octopus vulgaris OX=6645 GN=LOC115222368 PE=3 SV=1	822.366	822.918	90	96	NKVEDMA	0.0876422	7
>tr|A0A6P7TER7|A0A6P7TER7_OCTVU myosin heavy chain, non-muscle isoform X3 OS=Octopus vulgaris OX=6645 GN=LOC115222368 PE=3 SV=1	823.383	823.883	1030	1036	VGEEDKF	0.148812	7
>tr|A0A6P7TER7|A0A6P7TER7_OCTVU myosin heavy chain, non-muscle isoform X3 OS=Octopus vulgaris OX=6645 GN=LOC115222368 PE=3 SV=1	830.484	830.968	1321	1327	NRKVSNL	0.106984	7
>tr|A0A6P7TER7|A0A6P7TER7_OCTVU myosin heavy chain, non-muscle isoform X3 OS=Octopus vulgaris OX=6645 GN=LOC115222368 PE=3 SV=1	834.395	834.866	939	945	NDTESRL	0.128849	7
>tr|A0A6P7TER7|A0A6P7TER7_OCTVU myosin heavy chain, non-muscle isoform X3 OS=Octopus vulgaris OX=6645 GN=LOC115222368 PE=3 SV=1	834.432	834.91	1286	1292	DRSKTDL	0.164293	7
>tr|A0A6P7TER7|A0A6P7TER7_OCTVU myosin heavy chain, non-muscle isoform X3 OS=Octopus vulgaris OX=6645 GN=LOC115222368 PE=3 SV=1	835.379	835.851	1356	1362	TDERDSI	0.0540233	7
>tr|A0A6P7TER7|A0A6P7TER7_OCTVU myosin heavy chain, non-muscle isoform X3 OS=Octopus vulgaris OX=6645 GN=LOC115222368 PE=3 SV=1	836.411	836.882	1953	1960	STVRSSEA	0.0387183	8
>tr|A0A6P7TER7|A0A6P7TER7_OCTVU myosin heavy chain, non-muscle isoform X3 OS=Octopus vulgaris OX=6645 GN=LOC115222368 PE=3 SV=1	844.525	845.036	1770	1776	VDKNKKL	0.131604	7
>tr|A0A6P7TER7|A0A6P7TER7_OCTVU myosin heavy chain, non-muscle isoform X3 OS=Octopus vulgaris OX=6645 GN=LOC115222368 PE=3 SV=1	845.509	846.02	1812	1818	KTKVQEL	0.0404767	7
>tr|A0A6P7TER7|A0A6P7TER7_OCTVU myosin heavy chain, non-muscle isoform X3 OS=Octopus vulgaris OX=6645 GN=LOC115222368 PE=3 SV=1	846.403	846.984	1276	1282	QEQSMKL	0.271729	7
>tr|A0A6P7TER7|A0A6P7TER7_OCTVU myosin heavy chain, non-muscle isoform X3 OS=Octopus vulgaris OX=6645 GN=LOC115222368 PE=3 SV=1	846.468	846.965	1521	1527	KKSQNEL	0.0789841	7
>tr|A0A6P7TER7|A0A6P7TER7_OCTVU myosin heavy chain, non-muscle isoform X3 OS=Octopus vulgaris OX=6645 GN=LOC115222368 PE=3 SV=1	848.4	849.065	611	617	MKNMDPL	0.603578	7
>tr|A0A6P7TER7|A0A6P7TER7_OCTVU myosin heavy chain, non-muscle isoform X3 OS=Octopus vulgaris OX=6645 GN=LOC115222368 PE=3 SV=1	850.434	851.015	1237	1243	DKMKESL	0.104853	7
>tr|A0A6P7TER7|A0A6P7TER7_OCTVU myosin heavy chain, non-muscle isoform X3 OS=Octopus vulgaris OX=6645 GN=LOC115222368 PE=3 SV=1	851.447	851.937	1733	1741	SGSVSKSSL	0.173409	9
>tr|A0A6P7TER7|A0A6P7TER7_OCTVU myosin heavy chain, non-muscle isoform X3 OS=Octopus vulgaris OX=6645 GN=LOC115222368 PE=3 SV=1	852.413	852.988	1004	1011	TSDMTGKL	0.249449	8
>tr|A0A6P7TER7|A0A6P7TER7_OCTVU myosin heavy chain, non-muscle isoform X3 OS=Octopus vulgaris OX=6645 GN=LOC115222368 PE=3 SV=1	859.525	860.048	1862	1868	DKKVKEL	0.0677019	7
>tr|A0A6P7TER7|A0A6P7TER7_OCTVU myosin heavy chain, non-muscle isoform X3 OS=Octopus vulgaris OX=6645 GN=LOC115222368 PE=3 SV=1	862.398	862.983	1276	1282	QEQSMKL	0.271729	7
>tr|A0A6P7TER7|A0A6P7TER7_OCTVU myosin heavy chain, non-muscle isoform X3 OS=Octopus vulgaris OX=6645 GN=LOC115222368 PE=3 SV=1	862.417	862.926	683	689	RNTNPNF	0.502108	7
>tr|A0A6P7TER7|A0A6P7TER7_OCTVU myosin heavy chain, non-muscle isoform X3 OS=Octopus vulgaris OX=6645 GN=LOC115222368 PE=3 SV=1	863.429	864.014	1276	1282	QEQSMKL	0.271729	7
>tr|A0A6P7TER7|A0A6P7TER7_OCTVU myosin heavy chain, non-muscle isoform X3 OS=Octopus vulgaris OX=6645 GN=LOC115222368 PE=3 SV=1	864.395	865.064	611	617	MKNMDPL	0.603578	7
>tr|A0A6P7TER7|A0A6P7TER7_OCTVU myosin heavy chain, non-muscle isoform X3 OS=Octopus vulgaris OX=6645 GN=LOC115222368 PE=3 SV=1	866.429	867.015	1237	1243	DKMKESL	0.104853	7
>tr|A0A6P7TER7|A0A6P7TER7_OCTVU myosin heavy chain, non-muscle isoform X3 OS=Octopus vulgaris OX=6645 GN=LOC115222368 PE=3 SV=1	868.408	868.987	1004	1011	TSDMTGKL	0.249449	8
>tr|A0A6P7TER7|A0A6P7TER7_OCTVU myosin heavy chain, non-muscle isoform X3 OS=Octopus vulgaris OX=6645 GN=LOC115222368 PE=3 SV=1	873.49	873.993	20	26	TVDRNRL	0.133443	7
>tr|A0A6P7TER7|A0A6P7TER7_OCTVU myosin heavy chain, non-muscle isoform X3 OS=Octopus vulgaris OX=6645 GN=LOC115222368 PE=3 SV=1	879.424	880.014	1276	1282	QEQSMKL	0.271729	7
>tr|A0A6P7TER7|A0A6P7TER7_OCTVU myosin heavy chain, non-muscle isoform X3 OS=Octopus vulgaris OX=6645 GN=LOC115222368 PE=3 SV=1	880.39	881.064	611	617	MKNMDPL	0.603578	7
>tr|A0A6P7TER7|A0A6P7TER7_OCTVU myosin heavy chain, non-muscle isoform X3 OS=Octopus vulgaris OX=6645 GN=LOC115222368 PE=3 SV=1	883.317	883.977	1311	1318	EECDGSML	0.411715	8
>tr|A0A6P7TER7|A0A6P7TER7_OCTVU myosin heavy chain, non-muscle isoform X3 OS=Octopus vulgaris OX=6645 GN=LOC115222368 PE=3 SV=1	888.49	889.005	1124	1130	TKQQRDL	0.113333	7
>tr|A0A6P7TER7|A0A6P7TER7_OCTVU myosin heavy chain, non-muscle isoform X3 OS=Octopus vulgaris OX=6645 GN=LOC115222368 PE=3 SV=1	890.531	891.062	1227	1234	DTVKKTKA	0.0406392	8
>tr|A0A6P7TER7|A0A6P7TER7_OCTVU myosin heavy chain, non-muscle isoform X3 OS=Octopus vulgaris OX=6645 GN=LOC115222368 PE=3 SV=1	891.472	892.071	928	934	TNRKMEL	0.134384	7
>tr|A0A6P7TER7|A0A6P7TER7_OCTVU myosin heavy chain, non-muscle isoform X3 OS=Octopus vulgaris OX=6645 GN=LOC115222368 PE=3 SV=1	895.406	895.956	43	50	VPHDSHGF	0.594371	8
>tr|A0A6P7TER7|A0A6P7TER7_OCTVU myosin heavy chain, non-muscle isoform X3 OS=Octopus vulgaris OX=6645 GN=LOC115222368 PE=3 SV=1	899.312	899.977	1311	1318	EECDGSML	0.411715	8
>tr|A0A6P7TER7|A0A6P7TER7_OCTVU myosin heavy chain, non-muscle isoform X3 OS=Octopus vulgaris OX=6645 GN=LOC115222368 PE=3 SV=1	902.469	902.988	1805	1811	ERQNKDL	0.0918434	7
>tr|A0A6P7TER7|A0A6P7TER7_OCTVU myosin heavy chain, non-muscle isoform X3 OS=Octopus vulgaris OX=6645 GN=LOC115222368 PE=3 SV=1	903.501	904.02	1742	1748	SDEKRRL	0.377959	7
>tr|A0A6P7TER7|A0A6P7TER7_OCTVU myosin heavy chain, non-muscle isoform X3 OS=Octopus vulgaris OX=6645 GN=LOC115222368 PE=3 SV=1	907.467	908.071	928	934	TNRKMEL	0.134384	7
>tr|A0A6P7TER7|A0A6P7TER7_OCTVU myosin heavy chain, non-muscle isoform X3 OS=Octopus vulgaris OX=6645 GN=LOC115222368 PE=3 SV=1	909.398	909.996	344	351	NQTSESML	0.15535	8
>tr|A0A6P7TER7|A0A6P7TER7_OCTVU myosin heavy chain, non-muscle isoform X3 OS=Octopus vulgaris OX=6645 GN=LOC115222368 PE=3 SV=1	915.548	916.077	1911	1917	NTQRRKL	0.150865	7
>tr|A0A6P7TER7|A0A6P7TER7_OCTVU myosin heavy chain, non-muscle isoform X3 OS=Octopus vulgaris OX=6645 GN=LOC115222368 PE=3 SV=1	916.521	917.059	1152	1158	EKQKRDL	0.0903234	7
>tr|A0A6P7TER7|A0A6P7TER7_OCTVU myosin heavy chain, non-muscle isoform X3 OS=Octopus vulgaris OX=6645 GN=LOC115222368 PE=3 SV=1	918.464	918.988	1100	1106	SRREEEL	0.081042	7
>tr|A0A6P7TER7|A0A6P7TER7_OCTVU myosin heavy chain, non-muscle isoform X3 OS=Octopus vulgaris OX=6645 GN=LOC115222368 PE=3 SV=1	925.393	925.996	344	351	NQTSESML	0.15535	8
>tr|A0A6P7TER7|A0A6P7TER7_OCTVU myosin heavy chain, non-muscle isoform X3 OS=Octopus vulgaris OX=6645 GN=LOC115222368 PE=3 SV=1	926.444	926.97	1873	1879	EEERRHA	0.0537547	7
>tr|A0A6P7TER7|A0A6P7TER7_OCTVU myosin heavy chain, non-muscle isoform X3 OS=Octopus vulgaris OX=6645 GN=LOC115222368 PE=3 SV=1	929.469	930.011	1790	1797	EKSTSQHL	0.08922	8
>tr|A0A6P7TER7|A0A6P7TER7_OCTVU myosin heavy chain, non-muscle isoform X3 OS=Octopus vulgaris OX=6645 GN=LOC115222368 PE=3 SV=1	931.507	932.033	462	469	DRTKRQGA	0.0854417	8
>tr|A0A6P7TER7|A0A6P7TER7_OCTVU myosin heavy chain, non-muscle isoform X3 OS=Octopus vulgaris OX=6645 GN=LOC115222368 PE=3 SV=1	934.532	935.074	1623	1630	RTQKTTSI	0.0347471	8
>tr|A0A6P7TER7|A0A6P7TER7_OCTVU myosin heavy chain, non-muscle isoform X3 OS=Octopus vulgaris OX=6645 GN=LOC115222368 PE=3 SV=1	950.396	951.112	1570	1577	QTMEDCKL	0.266619	8
>tr|A0A6P7TER7|A0A6P7TER7_OCTVU myosin heavy chain, non-muscle isoform X3 OS=Octopus vulgaris OX=6645 GN=LOC115222368 PE=3 SV=1	957.609	958.196	990	997	VDQKVKKL	0.148255	8
>tr|A0A6P7TER7|A0A6P7TER7_OCTVU myosin heavy chain, non-muscle isoform X3 OS=Octopus vulgaris OX=6645 GN=LOC115222368 PE=3 SV=1	966.391	967.111	1570	1577	QTMEDCKL	0.266619	8
>tr|A0A6P7TER7|A0A6P7TER7_OCTVU myosin heavy chain, non-muscle isoform X3 OS=Octopus vulgaris OX=6645 GN=LOC115222368 PE=3 SV=1	967.422	968.143	1570	1577	QTMEDCKL	0.266619	8
>tr|A0A6P7TER7|A0A6P7TER7_OCTVU myosin heavy chain, non-muscle isoform X3 OS=Octopus vulgaris OX=6645 GN=LOC115222368 PE=3 SV=1	967.459	968.02	252	259	KNDNSSRF	0.313822	8
>tr|A0A6P7TER7|A0A6P7TER7_OCTVU myosin heavy chain, non-muscle isoform X3 OS=Octopus vulgaris OX=6645 GN=LOC115222368 PE=3 SV=1	968.432	969.001	1507	1513	EEERDKY	0.0609338	7
>tr|A0A6P7TER7|A0A6P7TER7_OCTVU myosin heavy chain, non-muscle isoform X3 OS=Octopus vulgaris OX=6645 GN=LOC115222368 PE=3 SV=1	973.422	973.977	172	179	QDREDQSI	0.0793203	8
>tr|A0A6P7TER7|A0A6P7TER7_OCTVU myosin heavy chain, non-muscle isoform X3 OS=Octopus vulgaris OX=6645 GN=LOC115222368 PE=3 SV=1	983.417	984.142	1570	1577	QTMEDCKL	0.266619	8
>tr|A0A6P7TER7|A0A6P7TER7_OCTVU myosin heavy chain, non-muscle isoform X3 OS=Octopus vulgaris OX=6645 GN=LOC115222368 PE=3 SV=1	990.449	991.008	172	179	QDREDQSI	0.0793203	8
>tr|A0A6P7TER7|A0A6P7TER7_OCTVU myosin heavy chain, non-muscle isoform X3 OS=Octopus vulgaris OX=6645 GN=LOC115222368 PE=3 SV=1	991.473	992.08	429	436	QTKEQVEF	0.0634682	8
>tr|A0A6P7TER7|A0A6P7TER7_OCTVU myosin heavy chain, non-muscle isoform X3 OS=Octopus vulgaris OX=6645 GN=LOC115222368 PE=3 SV=1	993.438	994.181	1050	1057	MNEMEVQL	0.0897298	8
>tr|A0A6P7TER7|A0A6P7TER7_OCTVU myosin heavy chain, non-muscle isoform X3 OS=Octopus vulgaris OX=6645 GN=LOC115222368 PE=3 SV=1	997.565	998.139	1942	1950	RPPGRTSRA	0.346628	9
>tr|A0A6P7TER7|A0A6P7TER7_OCTVU myosin heavy chain, non-muscle isoform X3 OS=Octopus vulgaris OX=6645 GN=LOC115222368 PE=3 SV=1	1008.5	1009.11	429	436	QTKEQVEF	0.0634682	8
>tr|A0A6P7TER7|A0A6P7TER7_OCTVU myosin heavy chain, non-muscle isoform X3 OS=Octopus vulgaris OX=6645 GN=LOC115222368 PE=3 SV=1	1009.43	1010.18	1050	1057	MNEMEVQL	0.0897298	8
>tr|A0A6P7TER7|A0A6P7TER7_OCTVU myosin heavy chain, non-muscle isoform X3 OS=Octopus vulgaris OX=6645 GN=LOC115222368 PE=3 SV=1	1023.48	1024.14	1883	1891	KEQMDKSSA	0.0679081	9
>tr|A0A6P7TER7|A0A6P7TER7_OCTVU myosin heavy chain, non-muscle isoform X3 OS=Octopus vulgaris OX=6645 GN=LOC115222368 PE=3 SV=1	1025.43	1026.18	1050	1057	MNEMEVQL	0.0897298	8
>tr|A0A6P7TER7|A0A6P7TER7_OCTVU myosin heavy chain, non-muscle isoform X3 OS=Octopus vulgaris OX=6645 GN=LOC115222368 PE=3 SV=1	1039.47	1040.14	1883	1891	KEQMDKSSA	0.0679081	9
>tr|A0A6P7TER7|A0A6P7TER7_OCTVU myosin heavy chain, non-muscle isoform X3 OS=Octopus vulgaris OX=6645 GN=LOC115222368 PE=3 SV=1	1039.55	1040.24	656	664	GSRTRKGMF	0.678199	9
>tr|A0A6P7TER7|A0A6P7TER7_OCTVU myosin heavy chain, non-muscle isoform X3 OS=Octopus vulgaris OX=6645 GN=LOC115222368 PE=3 SV=1	1047.42	1048.01	1760	1768	DEEQNNGEI	0.0768448	9
>tr|A0A6P7TER7|A0A6P7TER7_OCTVU myosin heavy chain, non-muscle isoform X3 OS=Octopus vulgaris OX=6645 GN=LOC115222368 PE=3 SV=1	1047.53	1048.14	860	868	SVTNQEEKL	0.0765626	9
>tr|A0A6P7TER7|A0A6P7TER7_OCTVU myosin heavy chain, non-muscle isoform X3 OS=Octopus vulgaris OX=6645 GN=LOC115222368 PE=3 SV=1	1049.53	1050.17	574	582	GHHVTHSKF	0.295921	9
>tr|A0A6P7TER7|A0A6P7TER7_OCTVU myosin heavy chain, non-muscle isoform X3 OS=Octopus vulgaris OX=6645 GN=LOC115222368 PE=3 SV=1	1055.54	1056.24	656	664	GSRTRKGMF	0.678199	9
>tr|A0A6P7TER7|A0A6P7TER7_OCTVU myosin heavy chain, non-muscle isoform X3 OS=Octopus vulgaris OX=6645 GN=LOC115222368 PE=3 SV=1	1056.45	1057.14	211	219	NNRSSMSNF	0.429612	9
>tr|A0A6P7TER7|A0A6P7TER7_OCTVU myosin heavy chain, non-muscle isoform X3 OS=Octopus vulgaris OX=6645 GN=LOC115222368 PE=3 SV=1	1060.59	1061.19	284	292	EKSRSVRQA	0.0700844	9
>tr|A0A6P7TER7|A0A6P7TER7_OCTVU myosin heavy chain, non-muscle isoform X3 OS=Octopus vulgaris OX=6645 GN=LOC115222368 PE=3 SV=1	1072.45	1073.14	211	219	NNRSSMSNF	0.429612	9
>tr|A0A6P7TER7|A0A6P7TER7_OCTVU myosin heavy chain, non-muscle isoform X3 OS=Octopus vulgaris OX=6645 GN=LOC115222368 PE=3 SV=1	1075.51	1076.12	379	387	KQERNSDQA	0.0499699	9
>tr|A0A6P7TER7|A0A6P7TER7_OCTVU myosin heavy chain, non-muscle isoform X3 OS=Octopus vulgaris OX=6645 GN=LOC115222368 PE=3 SV=1	1117.66	1118.33	188	197	GKTENTKKVI	0.067075	10
>tr|A0A6P7TER7|A0A6P7TER7_OCTVU myosin heavy chain, non-muscle isoform X3 OS=Octopus vulgaris OX=6645 GN=LOC115222368 PE=3 SV=1	1123.63	1124.3	419	428	KVGRDHVNKA	0.121354	10
>tr|A0A6P7TER7|A0A6P7TER7_OCTVU myosin heavy chain, non-muscle isoform X3 OS=Octopus vulgaris OX=6645 GN=LOC115222368 PE=3 SV=1	1127.52	1128.26	484	493	KNSDGKMNSF	0.400084	10
>tr|A0A6P7TER7|A0A6P7TER7_OCTVU myosin heavy chain, non-muscle isoform X3 OS=Octopus vulgaris OX=6645 GN=LOC115222368 PE=3 SV=1	1134.47	1135.2	1922	1930	DEQMEQNQL	0.106963	9
>tr|A0A6P7TER7|A0A6P7TER7_OCTVU myosin heavy chain, non-muscle isoform X3 OS=Octopus vulgaris OX=6645 GN=LOC115222368 PE=3 SV=1	1143.51	1144.26	484	493	KNSDGKMNSF	0.400084	10
>tr|A0A6P7TER7|A0A6P7TER7_OCTVU myosin heavy chain, non-muscle isoform X3 OS=Octopus vulgaris OX=6645 GN=LOC115222368 PE=3 SV=1	1148.52	1149.17	1845	1854	DQDNKEKNSA	0.0720269	10
>tr|A0A6P7TER7|A0A6P7TER7_OCTVU myosin heavy chain, non-muscle isoform X3 OS=Octopus vulgaris OX=6645 GN=LOC115222368 PE=3 SV=1	1150.47	1151.2	1922	1930	DEQMEQNQL	0.106963	9
>tr|A0A6P7TER7|A0A6P7TER7_OCTVU myosin heavy chain, non-muscle isoform X3 OS=Octopus vulgaris OX=6645 GN=LOC115222368 PE=3 SV=1	1161.5	1162.16	1367	1375	EEEEENRNL	0.0656078	9
>tr|A0A6P7TER7|A0A6P7TER7_OCTVU myosin heavy chain, non-muscle isoform X3 OS=Octopus vulgaris OX=6645 GN=LOC115222368 PE=3 SV=1	1161.65	1162.35	695	704	PNHDKRPGKI	0.441553	10
>tr|A0A6P7TER7|A0A6P7TER7_OCTVU myosin heavy chain, non-muscle isoform X3 OS=Octopus vulgaris OX=6645 GN=LOC115222368 PE=3 SV=1	1178.57	1179.34	1381	1390	EKNQSTMVEL	0.0888147	10
>tr|A0A6P7TER7|A0A6P7TER7_OCTVU myosin heavy chain, non-muscle isoform X3 OS=Octopus vulgaris OX=6645 GN=LOC115222368 PE=3 SV=1	1179.58	1180.33	1142	1151	DSEKQSRMKA	0.160814	10
>tr|A0A6P7TER7|A0A6P7TER7_OCTVU myosin heavy chain, non-muscle isoform X3 OS=Octopus vulgaris OX=6645 GN=LOC115222368 PE=3 SV=1	1194.57	1195.34	1381	1390	EKNQSTMVEL	0.0888147	10
>tr|A0A6P7TER7|A0A6P7TER7_OCTVU myosin heavy chain, non-muscle isoform X3 OS=Octopus vulgaris OX=6645 GN=LOC115222368 PE=3 SV=1	1195.51	1196.28	946	955	EEEMKNSESL	0.0672465	10
>tr|A0A6P7TER7|A0A6P7TER7_OCTVU myosin heavy chain, non-muscle isoform X3 OS=Octopus vulgaris OX=6645 GN=LOC115222368 PE=3 SV=1	1195.57	1196.33	1142	1151	DSEKQSRMKA	0.160814	10
>tr|A0A6P7TER7|A0A6P7TER7_OCTVU myosin heavy chain, non-muscle isoform X3 OS=Octopus vulgaris OX=6645 GN=LOC115222368 PE=3 SV=1	1204.74	1205.56	1690	1699	KDMKKKVKSL	0.154021	10
>tr|A0A6P7TER7|A0A6P7TER7_OCTVU myosin heavy chain, non-muscle isoform X3 OS=Octopus vulgaris OX=6645 GN=LOC115222368 PE=3 SV=1	1211.51	1212.28	946	955	EEEMKNSESL	0.0672465	10
>tr|A0A6P7TER7|A0A6P7TER7_OCTVU myosin heavy chain, non-muscle isoform X3 OS=Octopus vulgaris OX=6645 GN=LOC115222368 PE=3 SV=1	1218.56	1219.26	1111	1121	QKSEDESVSRA	0.0960454	11
>tr|A0A6P7TER7|A0A6P7TER7_OCTVU myosin heavy chain, non-muscle isoform X3 OS=Octopus vulgaris OX=6645 GN=LOC115222368 PE=3 SV=1	1220.74	1221.56	1690	1699	KDMKKKVKSL	0.154021	10
>tr|A0A6P7TER7|A0A6P7TER7_OCTVU myosin heavy chain, non-muscle isoform X3 OS=Octopus vulgaris OX=6645 GN=LOC115222368 PE=3 SV=1	1235.59	1236.29	1111	1121	QKSEDESVSRA	0.0960454	11
>tr|A0A6P7TER7|A0A6P7TER7_OCTVU myosin heavy chain, non-muscle isoform X3 OS=Octopus vulgaris OX=6645 GN=LOC115222368 PE=3 SV=1	1245.59	1246.39	1058	1067	QKETQCRQEL	0.105691	10
>tr|A0A6P7TER7|A0A6P7TER7_OCTVU myosin heavy chain, non-muscle isoform X3 OS=Octopus vulgaris OX=6645 GN=LOC115222368 PE=3 SV=1	1262.62	1263.42	1058	1067	QKETQCRQEL	0.105691	10
>tr|A0A6P7TER7|A0A6P7TER7_OCTVU myosin heavy chain, non-muscle isoform X3 OS=Octopus vulgaris OX=6645 GN=LOC115222368 PE=3 SV=1	1306.58	1307.32	1440	1450	SEENEDSRVEL	0.0858218	11
>tr|A0A6P7TER7|A0A6P7TER7_OCTVU myosin heavy chain, non-muscle isoform X3 OS=Octopus vulgaris OX=6645 GN=LOC115222368 PE=3 SV=1	1318.7	1319.47	1531	1542	VSSVDSDKRNVL	0.18055	12
>tr|A0A6P7TER7|A0A6P7TER7_OCTVU myosin heavy chain, non-muscle isoform X3 OS=Octopus vulgaris OX=6645 GN=LOC115222368 PE=3 SV=1	1384.62	1385.5	328	341	SHGSMPVNGVDDVA	0.154043	14
>tr|A0A6P7TER7|A0A6P7TER7_OCTVU myosin heavy chain, non-muscle isoform X3 OS=Octopus vulgaris OX=6645 GN=LOC115222368 PE=3 SV=1	1400.61	1401.5	328	341	SHGSMPVNGVDDVA	0.154043	14
>tr|A0A6P7TER7|A0A6P7TER7_OCTVU myosin heavy chain, non-muscle isoform X3 OS=Octopus vulgaris OX=6645 GN=LOC115222368 PE=3 SV=1	1429.82	1430.66	1261	1271	KQESERKRKQI	0.0923831	11
>tr|A0A6P7TER7|A0A6P7TER7_OCTVU myosin heavy chain, non-muscle isoform X3 OS=Octopus vulgaris OX=6645 GN=LOC115222368 PE=3 SV=1	1478.61	1479.46	1961	1973	GEKEESDEEVEQA	0.062499	13
>tr|A0A6P7TER7|A0A6P7TER7_OCTVU myosin heavy chain, non-muscle isoform X3 OS=Octopus vulgaris OX=6645 GN=LOC115222368 PE=3 SV=1	1586.9	1587.88	148	160	RGKKRHEVPPHVF	0.261771	13
>tr|A0A6P7TER7|A0A6P7TER7_OCTVU myosin heavy chain, non-muscle isoform X3 OS=Octopus vulgaris OX=6645 GN=LOC115222368 PE=3 SV=1	1659.83	1660.79	1086	1099	NEKRSQVEDVQSQL	0.0473022	14
>tr|A0A6P7TER7|A0A6P7TER7_OCTVU myosin heavy chain, non-muscle isoform X3 OS=Octopus vulgaris OX=6645 GN=LOC115222368 PE=3 SV=1	1830.86	1832.02	1201	1215	QKGSDQQMHDVRQKY	0.144749	15
>tr|A0A6P7TER7|A0A6P7TER7_OCTVU myosin heavy chain, non-muscle isoform X3 OS=Octopus vulgaris OX=6645 GN=LOC115222368 PE=3 SV=1	1846.85	1848.02	1201	1215	QKGSDQQMHDVRQKY	0.144749	15
>tr|A0A6P7TER7|A0A6P7TER7_OCTVU myosin heavy chain, non-muscle isoform X3 OS=Octopus vulgaris OX=6645 GN=LOC115222368 PE=3 SV=1	1847.88	1849.05	1201	1215	QKGSDQQMHDVRQKY	0.144749	15
>tr|A0A6P7TER7|A0A6P7TER7_OCTVU myosin heavy chain, non-muscle isoform X3 OS=Octopus vulgaris OX=6645 GN=LOC115222368 PE=3 SV=1	1863.88	1865.05	1201	1215	QKGSDQQMHDVRQKY	0.144749	15
>tr|A0A6P7TER7|A0A6P7TER7_OCTVU myosin heavy chain, non-muscle isoform X3 OS=Octopus vulgaris OX=6645 GN=LOC115222368 PE=3 SV=1	2639.29	2640.94	53	76	GCVVEEKGDEVVVEVEETGKRTTF	0.0123168	24
>Cluster-58773.194446;orf1 len=2057 frame:1 start:397 end:6567 gi|762092217|ref|XP_011428535.1| PREDICTED: uncharacterized protein LOC105329078 isoform X2 [Crassostrea gigas]	803.437	803.899	290	297	GNSTVRVA	0.132143	8
>Cluster-58773.194446;orf1 len=2057 frame:1 start:397 end:6567 gi|762092217|ref|XP_011428535.1| PREDICTED: uncharacterized protein LOC105329078 isoform X2 [Crassostrea gigas]	824.415	824.914	302	309	SGGTVEKF	0.300038	8
>Cluster-58773.194446;orf1 len=2057 frame:1 start:397 end:6567 gi|762092217|ref|XP_011428535.1| PREDICTED: uncharacterized protein LOC105329078 isoform X2 [Crassostrea gigas]	835.39	835.854	861	869	DSSGSVGRA	0.326632	9
>Cluster-58773.194446;orf1 len=2057 frame:1 start:397 end:6567 gi|762092217|ref|XP_011428535.1| PREDICTED: uncharacterized protein LOC105329078 isoform X2 [Crassostrea gigas]	835.467	835.984	1007	1013	SKPTKQF	0.37643	7
>Cluster-58773.194446;orf1 len=2057 frame:1 start:397 end:6567 gi|762092217|ref|XP_011428535.1| PREDICTED: uncharacterized protein LOC105329078 isoform X2 [Crassostrea gigas]	836.328	836.967	249	256	PDCNVSMA	0.416267	8
>Cluster-58773.194446;orf1 len=2057 frame:1 start:397 end:6567 gi|762092217|ref|XP_011428535.1| PREDICTED: uncharacterized protein LOC105329078 isoform X2 [Crassostrea gigas]	836.342	836.838	667	673	SVDEHSY	0.0912828	7
>Cluster-58773.194446;orf1 len=2057 frame:1 start:397 end:6567 gi|762092217|ref|XP_011428535.1| PREDICTED: uncharacterized protein LOC105329078 isoform X2 [Crassostrea gigas]	852.323	852.966	249	256	PDCNVSMA	0.416267	8
>Cluster-58773.194446;orf1 len=2057 frame:1 start:397 end:6567 gi|762092217|ref|XP_011428535.1| PREDICTED: uncharacterized protein LOC105329078 isoform X2 [Crassostrea gigas]	864.399	864.961	1031	1038	SRQSCNVA	0.192742	8
>Cluster-58773.194446;orf1 len=2057 frame:1 start:397 end:6567 gi|762092217|ref|XP_011428535.1| PREDICTED: uncharacterized protein LOC105329078 isoform X2 [Crassostrea gigas]	865.39	865.877	60	68	DSSGSVSNL	0.252389	9
>Cluster-58773.194446;orf1 len=2057 frame:1 start:397 end:6567 gi|762092217|ref|XP_011428535.1| PREDICTED: uncharacterized protein LOC105329078 isoform X2 [Crassostrea gigas]	884.509	885.054	1491	1498	VDKVDPVI	0.109217	8
>Cluster-58773.194446;orf1 len=2057 frame:1 start:397 end:6567 gi|762092217|ref|XP_011428535.1| PREDICTED: uncharacterized protein LOC105329078 isoform X2 [Crassostrea gigas]	889.481	890.096	1499	1506	PSKCVDKI	0.288915	8
>Cluster-58773.194446;orf1 len=2057 frame:1 start:397 end:6567 gi|762092217|ref|XP_011428535.1| PREDICTED: uncharacterized protein LOC105329078 isoform X2 [Crassostrea gigas]	893.477	894.093	2041	2047	VVNCRRF	0.606688	7
>Cluster-58773.194446;orf1 len=2057 frame:1 start:397 end:6567 gi|762092217|ref|XP_011428535.1| PREDICTED: uncharacterized protein LOC105329078 isoform X2 [Crassostrea gigas]	896.472	897.022	878	885	VETVSKSF	0.0711858	8
>Cluster-58773.194446;orf1 len=2057 frame:1 start:397 end:6567 gi|762092217|ref|XP_011428535.1| PREDICTED: uncharacterized protein LOC105329078 isoform X2 [Crassostrea gigas]	898.39	898.91	900	907	DSGSRTEF	0.32789	8
>Cluster-58773.194446;orf1 len=2057 frame:1 start:397 end:6567 gi|762092217|ref|XP_011428535.1| PREDICTED: uncharacterized protein LOC105329078 isoform X2 [Crassostrea gigas]	902.437	902.988	206	214	TGPGTSHVF	0.234855	9
>Cluster-58773.194446;orf1 len=2057 frame:1 start:397 end:6567 gi|762092217|ref|XP_011428535.1| PREDICTED: uncharacterized protein LOC105329078 isoform X2 [Crassostrea gigas]	908.466	909.102	477	484	VKNMVNGF	0.378318	8
>Cluster-58773.194446;orf1 len=2057 frame:1 start:397 end:6567 gi|762092217|ref|XP_011428535.1| PREDICTED: uncharacterized protein LOC105329078 isoform X2 [Crassostrea gigas]	909.446	910.043	942	949	RETSMSKA	0.0792314	8
>Cluster-58773.194446;orf1 len=2057 frame:1 start:397 end:6567 gi|762092217|ref|XP_011428535.1| PREDICTED: uncharacterized protein LOC105329078 isoform X2 [Crassostrea gigas]	914.356	914.972	1291	1298	GTENCVEY	0.0834394	8
>Cluster-58773.194446;orf1 len=2057 frame:1 start:397 end:6567 gi|762092217|ref|XP_011428535.1| PREDICTED: uncharacterized protein LOC105329078 isoform X2 [Crassostrea gigas]	921.507	922.138	1225	1232	VKTTCKEI	0.0465389	8
>Cluster-58773.194446;orf1 len=2057 frame:1 start:397 end:6567 gi|762092217|ref|XP_011428535.1| PREDICTED: uncharacterized protein LOC105329078 isoform X2 [Crassostrea gigas]	924.461	925.101	477	484	VKNMVNGF	0.378318	8
>Cluster-58773.194446;orf1 len=2057 frame:1 start:397 end:6567 gi|762092217|ref|XP_011428535.1| PREDICTED: uncharacterized protein LOC105329078 isoform X2 [Crassostrea gigas]	925.441	926.042	942	949	RETSMSKA	0.0792314	8
>Cluster-58773.194446;orf1 len=2057 frame:1 start:397 end:6567 gi|762092217|ref|XP_011428535.1| PREDICTED: uncharacterized protein LOC105329078 isoform X2 [Crassostrea gigas]	932.396	932.925	366	374	TDGNSDNPI	0.158001	9
>Cluster-58773.194446;orf1 len=2057 frame:1 start:397 end:6567 gi|762092217|ref|XP_011428535.1| PREDICTED: uncharacterized protein LOC105329078 isoform X2 [Crassostrea gigas]	937.518	938.184	77	84	VKEMVKGF	0.271765	8
>Cluster-58773.194446;orf1 len=2057 frame:1 start:397 end:6567 gi|762092217|ref|XP_011428535.1| PREDICTED: uncharacterized protein LOC105329078 isoform X2 [Crassostrea gigas]	937.518	938.184	280	287	VKEMVKGF	0.271765	8
>Cluster-58773.194446;orf1 len=2057 frame:1 start:397 end:6567 gi|762092217|ref|XP_011428535.1| PREDICTED: uncharacterized protein LOC105329078 isoform X2 [Crassostrea gigas]	940.419	941.057	1942	1949	PSNCQKTY	0.366989	8
>Cluster-58773.194446;orf1 len=2057 frame:1 start:397 end:6567 gi|762092217|ref|XP_011428535.1| PREDICTED: uncharacterized protein LOC105329078 isoform X2 [Crassostrea gigas]	941.334	942.017	1427	1435	SDGCQSECI	0.364993	9
>Cluster-58773.194446;orf1 len=2057 frame:1 start:397 end:6567 gi|762092217|ref|XP_011428535.1| PREDICTED: uncharacterized protein LOC105329078 isoform X2 [Crassostrea gigas]	944.408	945.114	1992	1999	NCRKTCGY	0.375554	8
>Cluster-58773.194446;orf1 len=2057 frame:1 start:397 end:6567 gi|762092217|ref|XP_011428535.1| PREDICTED: uncharacterized protein LOC105329078 isoform X2 [Crassostrea gigas]	946.411	946.952	563	571	TDGQSNDPL	0.219129	9
>Cluster-58773.194446;orf1 len=2057 frame:1 start:397 end:6567 gi|762092217|ref|XP_011428535.1| PREDICTED: uncharacterized protein LOC105329078 isoform X2 [Crassostrea gigas]	953.513	954.183	77	84	VKEMVKGF	0.271765	8
>Cluster-58773.194446;orf1 len=2057 frame:1 start:397 end:6567 gi|762092217|ref|XP_011428535.1| PREDICTED: uncharacterized protein LOC105329078 isoform X2 [Crassostrea gigas]	953.513	954.183	280	287	VKEMVKGF	0.271765	8
>Cluster-58773.194446;orf1 len=2057 frame:1 start:397 end:6567 gi|762092217|ref|XP_011428535.1| PREDICTED: uncharacterized protein LOC105329078 isoform X2 [Crassostrea gigas]	956.458	957.04	499	506	SNQPVQHF	0.468331	8
>Cluster-58773.194446;orf1 len=2057 frame:1 start:397 end:6567 gi|762092217|ref|XP_011428535.1| PREDICTED: uncharacterized protein LOC105329078 isoform X2 [Crassostrea gigas]	958.532	959.097	690	698	GKDDVRVGL	0.35187	9
>Cluster-58773.194446;orf1 len=2057 frame:1 start:397 end:6567 gi|762092217|ref|XP_011428535.1| PREDICTED: uncharacterized protein LOC105329078 isoform X2 [Crassostrea gigas]	959.378	960.013	1276	1284	DPPNCVDEA	0.32583	9
>Cluster-58773.194446;orf1 len=2057 frame:1 start:397 end:6567 gi|762092217|ref|XP_011428535.1| PREDICTED: uncharacterized protein LOC105329078 isoform X2 [Crassostrea gigas]	966.449	967.161	1756	1763	CKERCTNL	0.285422	8
>Cluster-58773.194446;orf1 len=2057 frame:1 start:397 end:6567 gi|762092217|ref|XP_011428535.1| PREDICTED: uncharacterized protein LOC105329078 isoform X2 [Crassostrea gigas]	982.448	983.203	1525	1532	VQKNCPMY	0.514927	8
>Cluster-58773.194446;orf1 len=2057 frame:1 start:397 end:6567 gi|762092217|ref|XP_011428535.1| PREDICTED: uncharacterized protein LOC105329078 isoform X2 [Crassostrea gigas]	985.517	986.082	964	972	TDGRPNGRL	0.453239	9
>Cluster-58773.194446;orf1 len=2057 frame:1 start:397 end:6567 gi|762092217|ref|XP_011428535.1| PREDICTED: uncharacterized protein LOC105329078 isoform X2 [Crassostrea gigas]	993.496	994.055	328	337	SRVTGSTNTA	0.0487127	10
>Cluster-58773.194446;orf1 len=2057 frame:1 start:397 end:6567 gi|762092217|ref|XP_011428535.1| PREDICTED: uncharacterized protein LOC105329078 isoform X2 [Crassostrea gigas]	995.392	996.112	2000	2011	CGGSGGGPMTTA	0.581154	12
>Cluster-58773.194446;orf1 len=2057 frame:1 start:397 end:6567 gi|762092217|ref|XP_011428535.1| PREDICTED: uncharacterized protein LOC105329078 isoform X2 [Crassostrea gigas]	998.443	999.203	1525	1532	VQKNCPMY	0.514927	8
>Cluster-58773.194446;orf1 len=2057 frame:1 start:397 end:6567 gi|762092217|ref|XP_011428535.1| PREDICTED: uncharacterized protein LOC105329078 isoform X2 [Crassostrea gigas]	1000.5	1001.16	951	959	GMRSNVSHI	0.170057	9
>Cluster-58773.194446;orf1 len=2057 frame:1 start:397 end:6567 gi|762092217|ref|XP_011428535.1| PREDICTED: uncharacterized protein LOC105329078 isoform X2 [Crassostrea gigas]	1002.56	1003.15	485	493	DVGKDTVRI	0.135719	9
>Cluster-58773.194446;orf1 len=2057 frame:1 start:397 end:6567 gi|762092217|ref|XP_011428535.1| PREDICTED: uncharacterized protein LOC105329078 isoform X2 [Crassostrea gigas]	1003.51	1004.21	680	687	VHRMVQSF	0.227171	8
>Cluster-58773.194446;orf1 len=2057 frame:1 start:397 end:6567 gi|762092217|ref|XP_011428535.1| PREDICTED: uncharacterized protein LOC105329078 isoform X2 [Crassostrea gigas]	1004.45	1005.04	349	358	QPPHGDRSGA	0.481977	10
>Cluster-58773.194446;orf1 len=2057 frame:1 start:397 end:6567 gi|762092217|ref|XP_011428535.1| PREDICTED: uncharacterized protein LOC105329078 isoform X2 [Crassostrea gigas]	1009.52	1010.1	750	758	PQNGNRPNI	0.39975	9
>Cluster-58773.194446;orf1 len=2057 frame:1 start:397 end:6567 gi|762092217|ref|XP_011428535.1| PREDICTED: uncharacterized protein LOC105329078 isoform X2 [Crassostrea gigas]	1011.39	1012.11	2000	2011	CGGSGGGPMTTA	0.581154	12
>Cluster-58773.194446;orf1 len=2057 frame:1 start:397 end:6567 gi|762092217|ref|XP_011428535.1| PREDICTED: uncharacterized protein LOC105329078 isoform X2 [Crassostrea gigas]	1012.52	1013.21	1591	1599	PPNCQKVNL	0.508649	9
>Cluster-58773.194446;orf1 len=2057 frame:1 start:397 end:6567 gi|762092217|ref|XP_011428535.1| PREDICTED: uncharacterized protein LOC105329078 isoform X2 [Crassostrea gigas]	1016.49	1017.16	951	959	GMRSNVSHI	0.170057	9
>Cluster-58773.194446;orf1 len=2057 frame:1 start:397 end:6567 gi|762092217|ref|XP_011428535.1| PREDICTED: uncharacterized protein LOC105329078 isoform X2 [Crassostrea gigas]	1019.51	1020.21	680	687	VHRMVQSF	0.227171	8
>Cluster-58773.194446;orf1 len=2057 frame:1 start:397 end:6567 gi|762092217|ref|XP_011428535.1| PREDICTED: uncharacterized protein LOC105329078 isoform X2 [Crassostrea gigas]	1021.48	1022.07	349	358	QPPHGDRSGA	0.481977	10
>Cluster-58773.194446;orf1 len=2057 frame:1 start:397 end:6567 gi|762092217|ref|XP_011428535.1| PREDICTED: uncharacterized protein LOC105329078 isoform X2 [Crassostrea gigas]	1055.46	1056.26	1445	1453	VCQSKCPQY	0.325565	9
>Cluster-58773.194446;orf1 len=2057 frame:1 start:397 end:6567 gi|762092217|ref|XP_011428535.1| PREDICTED: uncharacterized protein LOC105329078 isoform X2 [Crassostrea gigas]	1059.47	1060.11	606	614	SDPDKDHVF	0.565887	9
>Cluster-58773.194446;orf1 len=2057 frame:1 start:397 end:6567 gi|762092217|ref|XP_011428535.1| PREDICTED: uncharacterized protein LOC105329078 isoform X2 [Crassostrea gigas]	1060.56	1061.19	591	601	GVGSGVNTKEL	0.171552	11
>Cluster-58773.194446;orf1 len=2057 frame:1 start:397 end:6567 gi|762092217|ref|XP_011428535.1| PREDICTED: uncharacterized protein LOC105329078 isoform X2 [Crassostrea gigas]	1067.46	1068.22	1744	1753	CECSDGKRGI	0.624904	10
>Cluster-58773.194446;orf1 len=2057 frame:1 start:397 end:6567 gi|762092217|ref|XP_011428535.1| PREDICTED: uncharacterized protein LOC105329078 isoform X2 [Crassostrea gigas]	1082.61	1083.24	1106	1114	NKHNNKKSL	0.164026	9
>Cluster-58773.194446;orf1 len=2057 frame:1 start:397 end:6567 gi|762092217|ref|XP_011428535.1| PREDICTED: uncharacterized protein LOC105329078 isoform X2 [Crassostrea gigas]	1085.44	1086.24	1664	1672	ECTERCPTF	0.383723	9
>Cluster-58773.194446;orf1 len=2057 frame:1 start:397 end:6567 gi|762092217|ref|XP_011428535.1| PREDICTED: uncharacterized protein LOC105329078 isoform X2 [Crassostrea gigas]	1086.58	1087.23	764	774	VVTDGKSNVPA	0.0700456	11
>Cluster-58773.194446;orf1 len=2057 frame:1 start:397 end:6567 gi|762092217|ref|XP_011428535.1| PREDICTED: uncharacterized protein LOC105329078 isoform X2 [Crassostrea gigas]	1103.68	1104.34	979	988	KKVKDSGTKL	0.120637	10
>Cluster-58773.194446;orf1 len=2057 frame:1 start:397 end:6567 gi|762092217|ref|XP_011428535.1| PREDICTED: uncharacterized protein LOC105329078 isoform X2 [Crassostrea gigas]	1120.47	1121.11	1057	1067	DSSGSVGNHNF	0.364246	11
>Cluster-58773.194446;orf1 len=2057 frame:1 start:397 end:6567 gi|762092217|ref|XP_011428535.1| PREDICTED: uncharacterized protein LOC105329078 isoform X2 [Crassostrea gigas]	1130.47	1131.28	1930	1938	KCQSRCNEY	0.220384	9
>Cluster-58773.194446;orf1 len=2057 frame:1 start:397 end:6567 gi|762092217|ref|XP_011428535.1| PREDICTED: uncharacterized protein LOC105329078 isoform X2 [Crassostrea gigas]	1145.59	1146.25	394	404	GVGSNVRQSEL	0.117373	11
>Cluster-58773.194446;orf1 len=2057 frame:1 start:397 end:6567 gi|762092217|ref|XP_011428535.1| PREDICTED: uncharacterized protein LOC105329078 isoform X2 [Crassostrea gigas]	1166.63	1167.32	148	158	GNGDRPKVPNI	0.403266	11
>Cluster-58773.194446;orf1 len=2057 frame:1 start:397 end:6567 gi|762092217|ref|XP_011428535.1| PREDICTED: uncharacterized protein LOC105329078 isoform X2 [Crassostrea gigas]	1177.59	1178.36	1039	1049	PKEKNVTCTSA	0.099412	11
>Cluster-58773.194446;orf1 len=2057 frame:1 start:397 end:6567 gi|762092217|ref|XP_011428535.1| PREDICTED: uncharacterized protein LOC105329078 isoform X2 [Crassostrea gigas]	1263.46	1264.34	1824	1834	RCTCEDDTTGY	0.144737	11
>Cluster-58773.194446;orf1 len=2057 frame:1 start:397 end:6567 gi|762092217|ref|XP_011428535.1| PREDICTED: uncharacterized protein LOC105329078 isoform X2 [Crassostrea gigas]	1301.57	1302.48	926	937	PTRNGMTHMGEA	0.130562	12
>Cluster-58773.194446;orf1 len=2057 frame:1 start:397 end:6567 gi|762092217|ref|XP_011428535.1| PREDICTED: uncharacterized protein LOC105329078 isoform X2 [Crassostrea gigas]	1317.57	1318.48	926	937	PTRNGMTHMGEA	0.130562	12
>Cluster-58773.194446;orf1 len=2057 frame:1 start:397 end:6567 gi|762092217|ref|XP_011428535.1| PREDICTED: uncharacterized protein LOC105329078 isoform X2 [Crassostrea gigas]	1333.56	1334.48	926	937	PTRNGMTHMGEA	0.130562	12
>Cluster-58773.194446;orf1 len=2057 frame:1 start:397 end:6567 gi|762092217|ref|XP_011428535.1| PREDICTED: uncharacterized protein LOC105329078 isoform X2 [Crassostrea gigas]	1333.6	1334.35	1616	1629	DSGGSSNKSTGHSI	0.251117	14
>Cluster-58773.194446;orf1 len=2057 frame:1 start:397 end:6567 gi|762092217|ref|XP_011428535.1| PREDICTED: uncharacterized protein LOC105329078 isoform X2 [Crassostrea gigas]	1356.67	1357.54	908	918	KMNQHKDQQSL	0.102409	11
>Cluster-58773.194446;orf1 len=2057 frame:1 start:397 end:6567 gi|762092217|ref|XP_011428535.1| PREDICTED: uncharacterized protein LOC105329078 isoform X2 [Crassostrea gigas]	1372.66	1373.54	908	918	KMNQHKDQQSL	0.102409	11
>Cluster-58773.194446;orf1 len=2057 frame:1 start:397 end:6567 gi|762092217|ref|XP_011428535.1| PREDICTED: uncharacterized protein LOC105329078 isoform X2 [Crassostrea gigas]	1388.46	1389.55	1912	1924	NVGCEMECDCTNA	0.305716	13
>Cluster-58773.194446;orf1 len=2057 frame:1 start:397 end:6567 gi|762092217|ref|XP_011428535.1| PREDICTED: uncharacterized protein LOC105329078 isoform X2 [Crassostrea gigas]	1397.59	1398.57	1533	1546	CHSCPTPSVPQNGA	0.516836	14
>Cluster-58773.194446;orf1 len=2057 frame:1 start:397 end:6567 gi|762092217|ref|XP_011428535.1| PREDICTED: uncharacterized protein LOC105329078 isoform X2 [Crassostrea gigas]	1404.45	1405.55	1912	1924	NVGCEMECDCTNA	0.305716	13
>Cluster-58773.194446;orf1 len=2057 frame:1 start:397 end:6567 gi|762092217|ref|XP_011428535.1| PREDICTED: uncharacterized protein LOC105329078 isoform X2 [Crassostrea gigas]	1487.52	1488.68	1561	1574	QESCSMTCVCEDGL	0.439245	14
>Cluster-58773.194446;orf1 len=2057 frame:1 start:397 end:6567 gi|762092217|ref|XP_011428535.1| PREDICTED: uncharacterized protein LOC105329078 isoform X2 [Crassostrea gigas]	1500.77	1501.82	643	656	PPTKSPVVCNRTMA	0.598706	14
>Cluster-58773.194446;orf1 len=2057 frame:1 start:397 end:6567 gi|762092217|ref|XP_011428535.1| PREDICTED: uncharacterized protein LOC105329078 isoform X2 [Crassostrea gigas]	1503.51	1504.68	1561	1574	QESCSMTCVCEDGL	0.439245	14
>Cluster-58773.194446;orf1 len=2057 frame:1 start:397 end:6567 gi|762092217|ref|XP_011428535.1| PREDICTED: uncharacterized protein LOC105329078 isoform X2 [Crassostrea gigas]	1504.54	1505.71	1561	1574	QESCSMTCVCEDGL	0.439245	14
>Cluster-58773.194446;orf1 len=2057 frame:1 start:397 end:6567 gi|762092217|ref|XP_011428535.1| PREDICTED: uncharacterized protein LOC105329078 isoform X2 [Crassostrea gigas]	1516.76	1517.82	643	656	PPTKSPVVCNRTMA	0.598706	14
>Cluster-58773.194446;orf1 len=2057 frame:1 start:397 end:6567 gi|762092217|ref|XP_011428535.1| PREDICTED: uncharacterized protein LOC105329078 isoform X2 [Crassostrea gigas]	1520.54	1521.71	1561	1574	QESCSMTCVCEDGL	0.439245	14
>Cluster-58773.194446;orf1 len=2057 frame:1 start:397 end:6567 gi|762092217|ref|XP_011428535.1| PREDICTED: uncharacterized protein LOC105329078 isoform X2 [Crassostrea gigas]	1637.85	1638.9	1885	1899	GRSPRPVPSQQNVCL	0.516651	15
>Cluster-58773.194446;orf1 len=2057 frame:1 start:397 end:6567 gi|762092217|ref|XP_011428535.1| PREDICTED: uncharacterized protein LOC105329078 isoform X2 [Crassostrea gigas]	1644.82	1645.79	1393	1408	GGKSTTSTGHHKGSRF	0.274528	16
>Cluster-58773.194446;orf1 len=2057 frame:1 start:397 end:6567 gi|762092217|ref|XP_011428535.1| PREDICTED: uncharacterized protein LOC105329078 isoform X2 [Crassostrea gigas]	1702.88	1703.97	833	847	VRTCEVGKNKTEPEI	0.063194	15
>Cluster-58773.194446;orf1 len=2057 frame:1 start:397 end:6567 gi|762092217|ref|XP_011428535.1| PREDICTED: uncharacterized protein LOC105329078 isoform X2 [Crassostrea gigas]	1703.71	1704.95	1463	1477	EKKDGECCGEVKCEF	0.632935	15
>Cluster-58773.194446;orf1 len=2057 frame:1 start:397 end:6567 gi|762092217|ref|XP_011428535.1| PREDICTED: uncharacterized protein LOC105329078 isoform X2 [Crassostrea gigas]	1863.72	1865.11	1774	1789	NDPHDDCCRQMVCTNI	0.696614	16
>Cluster-58773.194446;orf1 len=2057 frame:1 start:397 end:6567 gi|762092217|ref|XP_011428535.1| PREDICTED: uncharacterized protein LOC105329078 isoform X2 [Crassostrea gigas]	1879.72	1881.11	1774	1789	NDPHDDCCRQMVCTNI	0.696614	16
>Cluster-58773.194446;orf1 len=2057 frame:1 start:397 end:6567 gi|762092217|ref|XP_011428535.1| PREDICTED: uncharacterized protein LOC105329078 isoform X2 [Crassostrea gigas]	1901.91	1903.37	1372	1389	PPQCTMVNVPGSCCKKPI	0.830953	18
>Cluster-58773.194446;orf1 len=2057 frame:1 start:397 end:6567 gi|762092217|ref|XP_011428535.1| PREDICTED: uncharacterized protein LOC105329078 isoform X2 [Crassostrea gigas]	1917.91	1919.37	1372	1389	PPQCTMVNVPGSCCKKPI	0.830953	18
>Cluster-58773.194446;orf1 len=2057 frame:1 start:397 end:6567 gi|762092217|ref|XP_011428535.1| PREDICTED: uncharacterized protein LOC105329078 isoform X2 [Crassostrea gigas]	2137.91	2139.47	1950	1969	VNNSCCPQVQCSSNPVCKDL	0.685506	20
>Cluster-58773.194446;orf1 len=2057 frame:1 start:397 end:6567 gi|762092217|ref|XP_011428535.1| PREDICTED: uncharacterized protein LOC105329078 isoform X2 [Crassostrea gigas]	2335.09	2336.79	1854	1874	KPDPKDPKCCKMPDCQSSSKL	0.590648	21
>Cluster-58773.194446;orf1 len=2057 frame:1 start:397 end:6567 gi|762092217|ref|XP_011428535.1| PREDICTED: uncharacterized protein LOC105329078 isoform X2 [Crassostrea gigas]	2351.09	2352.79	1854	1874	KPDPKDPKCCKMPDCQSSSKL	0.590648	21
>Cluster-58773.194446;orf1 len=2057 frame:1 start:397 end:6567 gi|762092217|ref|XP_011428535.1| PREDICTED: uncharacterized protein LOC105329078 isoform X2 [Crassostrea gigas]	2694.08	2696.13	1676	1700	PSDCQMVDVPGDTCCQMPVCNTTHI	0.526665	25
>Cluster-58773.194446;orf1 len=2057 frame:1 start:397 end:6567 gi|762092217|ref|XP_011428535.1| PREDICTED: uncharacterized protein LOC105329078 isoform X2 [Crassostrea gigas]	2710.07	2712.13	1676	1700	PSDCQMVDVPGDTCCQMPVCNTTHI	0.526665	25
>Cluster-58773.194446;orf1 len=2057 frame:1 start:397 end:6567 gi|762092217|ref|XP_011428535.1| PREDICTED: uncharacterized protein LOC105329078 isoform X2 [Crassostrea gigas]	2726.07	2728.13	1676	1700	PSDCQMVDVPGDTCCQMPVCNTTHI	0.526665	25
>Cluster-58773.176632;orf1 len=807 frame:1 start:1 end:2421 gi|657741131|ref|XP_008305640.1| PREDICTED: LOW QUALITY PROTEIN: SCO-spondin [Cynoglossus semilaevis]	806.233	806.85	330	336	TDDCCSY	0.322107	7
>Cluster-58773.176632;orf1 len=807 frame:1 start:1 end:2421 gi|657741131|ref|XP_008305640.1| PREDICTED: LOW QUALITY PROTEIN: SCO-spondin [Cynoglossus semilaevis]	818.371	818.929	636	642	PKEDCNL	0.335945	7
>Cluster-58773.176632;orf1 len=807 frame:1 start:1 end:2421 gi|657741131|ref|XP_008305640.1| PREDICTED: LOW QUALITY PROTEIN: SCO-spondin [Cynoglossus semilaevis]	822.312	822.94	596	603	DCEPKCGA	0.534692	8
>Cluster-58773.176632;orf1 len=807 frame:1 start:1 end:2421 gi|657741131|ref|XP_008305640.1| PREDICTED: LOW QUALITY PROTEIN: SCO-spondin [Cynoglossus semilaevis]	837.366	837.929	573	579	ETKECDL	0.0763627	7
>Cluster-58773.176632;orf1 len=807 frame:1 start:1 end:2421 gi|657741131|ref|XP_008305640.1| PREDICTED: LOW QUALITY PROTEIN: SCO-spondin [Cynoglossus semilaevis]	893.313	893.975	263	270	CHESDSCI	0.260706	8
>Cluster-58773.176632;orf1 len=807 frame:1 start:1 end:2421 gi|657741131|ref|XP_008305640.1| PREDICTED: LOW QUALITY PROTEIN: SCO-spondin [Cynoglossus semilaevis]	896.364	897.066	271	279	PGCVCPTGY	0.766514	9
>Cluster-58773.176632;orf1 len=807 frame:1 start:1 end:2421 gi|657741131|ref|XP_008305640.1| PREDICTED: LOW QUALITY PROTEIN: SCO-spondin [Cynoglossus semilaevis]	911.356	911.971	659	665	DPERECY	0.287973	7
>Cluster-58773.176632;orf1 len=807 frame:1 start:1 end:2421 gi|657741131|ref|XP_008305640.1| PREDICTED: LOW QUALITY PROTEIN: SCO-spondin [Cynoglossus semilaevis]	915.41	916.009	628	635	RNESGHCI	0.208817	8
>Cluster-58773.176632;orf1 len=807 frame:1 start:1 end:2421 gi|657741131|ref|XP_008305640.1| PREDICTED: LOW QUALITY PROTEIN: SCO-spondin [Cynoglossus semilaevis]	922.436	922.97	30	38	ETTPSTSSL	0.062479	9
>Cluster-58773.176632;orf1 len=807 frame:1 start:1 end:2421 gi|657741131|ref|XP_008305640.1| PREDICTED: LOW QUALITY PROTEIN: SCO-spondin [Cynoglossus semilaevis]	936.409	937.022	166	173	EQSKDCNI	0.164327	8
>Cluster-58773.176632;orf1 len=807 frame:1 start:1 end:2421 gi|657741131|ref|XP_008305640.1| PREDICTED: LOW QUALITY PROTEIN: SCO-spondin [Cynoglossus semilaevis]	955.386	956.088	345	353	CSKTCDEGL	0.425755	9
>Cluster-58773.176632;orf1 len=807 frame:1 start:1 end:2421 gi|657741131|ref|XP_008305640.1| PREDICTED: LOW QUALITY PROTEIN: SCO-spondin [Cynoglossus semilaevis]	976.441	977.262	697	705	NPCCPVCKL	0.906944	9
>Cluster-58773.176632;orf1 len=807 frame:1 start:1 end:2421 gi|657741131|ref|XP_008305640.1| PREDICTED: LOW QUALITY PROTEIN: SCO-spondin [Cynoglossus semilaevis]	1013.39	1014.06	608	616	PNSSECETF	0.367238	9
>Cluster-58773.176632;orf1 len=807 frame:1 start:1 end:2421 gi|657741131|ref|XP_008305640.1| PREDICTED: LOW QUALITY PROTEIN: SCO-spondin [Cynoglossus semilaevis]	1021.33	1022.13	763	771	HNNCECCQA	0.319418	9
>Cluster-58773.176632;orf1 len=807 frame:1 start:1 end:2421 gi|657741131|ref|XP_008305640.1| PREDICTED: LOW QUALITY PROTEIN: SCO-spondin [Cynoglossus semilaevis]	1032.37	1033.26	798	806	CSCECTKCR	0.721537	9
>Cluster-58773.176632;orf1 len=807 frame:1 start:1 end:2421 gi|657741131|ref|XP_008305640.1| PREDICTED: LOW QUALITY PROTEIN: SCO-spondin [Cynoglossus semilaevis]	1035.39	1036.07	683	691	PECNSDEEL	0.159126	9
>Cluster-58773.176632;orf1 len=807 frame:1 start:1 end:2421 gi|657741131|ref|XP_008305640.1| PREDICTED: LOW QUALITY PROTEIN: SCO-spondin [Cynoglossus semilaevis]	1048.4	1049.11	174	182	NPCESEPSW	0.380466	9
>Cluster-58773.176632;orf1 len=807 frame:1 start:1 end:2421 gi|657741131|ref|XP_008305640.1| PREDICTED: LOW QUALITY PROTEIN: SCO-spondin [Cynoglossus semilaevis]	1068.37	1069.12	435	445	SNCSDSCQPGA	0.605944	11
>Cluster-58773.176632;orf1 len=807 frame:1 start:1 end:2421 gi|657741131|ref|XP_008305640.1| PREDICTED: LOW QUALITY PROTEIN: SCO-spondin [Cynoglossus semilaevis]	1096.48	1097.26	541	551	SECKGDCGKGI	0.624217	11
>Cluster-58773.176632;orf1 len=807 frame:1 start:1 end:2421 gi|657741131|ref|XP_008305640.1| PREDICTED: LOW QUALITY PROTEIN: SCO-spondin [Cynoglossus semilaevis]	1120.41	1121.24	528	537	QPCDVTCGEW	0.717199	10
>Cluster-58773.176632;orf1 len=807 frame:1 start:1 end:2421 gi|657741131|ref|XP_008305640.1| PREDICTED: LOW QUALITY PROTEIN: SCO-spondin [Cynoglossus semilaevis]	1130.46	1131.28	189	199	STCTSTCGKGW	0.482508	11
>Cluster-58773.176632;orf1 len=807 frame:1 start:1 end:2421 gi|657741131|ref|XP_008305640.1| PREDICTED: LOW QUALITY PROTEIN: SCO-spondin [Cynoglossus semilaevis]	1137.43	1138.27	528	537	QPCDVTCGEW	0.717199	10
>Cluster-58773.176632;orf1 len=807 frame:1 start:1 end:2421 gi|657741131|ref|XP_008305640.1| PREDICTED: LOW QUALITY PROTEIN: SCO-spondin [Cynoglossus semilaevis]	1197.58	1198.28	8	19	TSTTPSTSTTTL	0.0476813	12
>Cluster-58773.176632;orf1 len=807 frame:1 start:1 end:2421 gi|657741131|ref|XP_008305640.1| PREDICTED: LOW QUALITY PROTEIN: SCO-spondin [Cynoglossus semilaevis]	1203.49	1204.27	518	527	TESEQQHCEI	0.0635067	10
>Cluster-58773.176632;orf1 len=807 frame:1 start:1 end:2421 gi|657741131|ref|XP_008305640.1| PREDICTED: LOW QUALITY PROTEIN: SCO-spondin [Cynoglossus semilaevis]	1229.46	1230.39	314	324	CERCTCTDGEI	0.210812	11
>Cluster-58773.176632;orf1 len=807 frame:1 start:1 end:2421 gi|657741131|ref|XP_008305640.1| PREDICTED: LOW QUALITY PROTEIN: SCO-spondin [Cynoglossus semilaevis]	1236.53	1237.3	361	371	EDGNTNCTRNI	0.23953	11
>Cluster-58773.176632;orf1 len=807 frame:1 start:1 end:2421 gi|657741131|ref|XP_008305640.1| PREDICTED: LOW QUALITY PROTEIN: SCO-spondin [Cynoglossus semilaevis]	1257.45	1258.4	105	116	TCNNCTCDDGVL	0.332871	12
>Cluster-58773.176632;orf1 len=807 frame:1 start:1 end:2421 gi|657741131|ref|XP_008305640.1| PREDICTED: LOW QUALITY PROTEIN: SCO-spondin [Cynoglossus semilaevis]	1291.58	1292.48	458	470	PQCGGKECVGNSI	0.562567	13
>Cluster-58773.176632;orf1 len=807 frame:1 start:1 end:2421 gi|657741131|ref|XP_008305640.1| PREDICTED: LOW QUALITY PROTEIN: SCO-spondin [Cynoglossus semilaevis]	1315.47	1316.44	243	254	SNCSNDCQQTCI	0.509509	12
>Cluster-58773.176632;orf1 len=807 frame:1 start:1 end:2421 gi|657741131|ref|XP_008305640.1| PREDICTED: LOW QUALITY PROTEIN: SCO-spondin [Cynoglossus semilaevis]	1331.56	1332.5	580	591	QKPCVCGENEEI	0.225941	12
>Cluster-58773.176632;orf1 len=807 frame:1 start:1 end:2421 gi|657741131|ref|XP_008305640.1| PREDICTED: LOW QUALITY PROTEIN: SCO-spondin [Cynoglossus semilaevis]	1344.69	1345.54	447	457	RQRQRSCSNPL	0.28627	11
>Cluster-58773.176632;orf1 len=807 frame:1 start:1 end:2421 gi|657741131|ref|XP_008305640.1| PREDICTED: LOW QUALITY PROTEIN: SCO-spondin [Cynoglossus semilaevis]	1348.59	1349.53	580	591	QKPCVCGENEEI	0.225941	12
>Cluster-58773.176632;orf1 len=807 frame:1 start:1 end:2421 gi|657741131|ref|XP_008305640.1| PREDICTED: LOW QUALITY PROTEIN: SCO-spondin [Cynoglossus semilaevis]	1358.63	1359.58	671	682	GGHVECQRKCEI	0.393323	12
>Cluster-58773.176632;orf1 len=807 frame:1 start:1 end:2421 gi|657741131|ref|XP_008305640.1| PREDICTED: LOW QUALITY PROTEIN: SCO-spondin [Cynoglossus semilaevis]	1369.65	1370.6	729	741	QKVRVTQCGGHCA	0.209307	13
>Cluster-58773.176632;orf1 len=807 frame:1 start:1 end:2421 gi|657741131|ref|XP_008305640.1| PREDICTED: LOW QUALITY PROTEIN: SCO-spondin [Cynoglossus semilaevis]	1386.67	1387.64	729	741	QKVRVTQCGGHCA	0.209307	13
>Cluster-58773.176632;orf1 len=807 frame:1 start:1 end:2421 gi|657741131|ref|XP_008305640.1| PREDICTED: LOW QUALITY PROTEIN: SCO-spondin [Cynoglossus semilaevis]	1448.69	1449.7	229	241	KNCTVEECPQGKI	0.289206	13
>Cluster-58773.176632;orf1 len=807 frame:1 start:1 end:2421 gi|657741131|ref|XP_008305640.1| PREDICTED: LOW QUALITY PROTEIN: SCO-spondin [Cynoglossus semilaevis]	1450.58	1451.41	77	89	DEDNPGSSHENHI	0.196911	13
>Cluster-58773.176632;orf1 len=807 frame:1 start:1 end:2421 gi|657741131|ref|XP_008305640.1| PREDICTED: LOW QUALITY PROTEIN: SCO-spondin [Cynoglossus semilaevis]	1452.73	1453.67	706	717	RSENKCQVKVDF	0.16027	12
>Cluster-58773.176632;orf1 len=807 frame:1 start:1 end:2421 gi|657741131|ref|XP_008305640.1| PREDICTED: LOW QUALITY PROTEIN: SCO-spondin [Cynoglossus semilaevis]	1499.68	1500.74	750	762	MSTKPDVVTDEMF	0.189895	13
>Cluster-58773.176632;orf1 len=807 frame:1 start:1 end:2421 gi|657741131|ref|XP_008305640.1| PREDICTED: LOW QUALITY PROTEIN: SCO-spondin [Cynoglossus semilaevis]	1515.67	1516.74	750	762	MSTKPDVVTDEMF	0.189895	13
>Cluster-58773.176632;orf1 len=807 frame:1 start:1 end:2421 gi|657741131|ref|XP_008305640.1| PREDICTED: LOW QUALITY PROTEIN: SCO-spondin [Cynoglossus semilaevis]	1531.67	1532.74	750	762	MSTKPDVVTDEMF	0.189895	13
>Cluster-58773.176632;orf1 len=807 frame:1 start:1 end:2421 gi|657741131|ref|XP_008305640.1| PREDICTED: LOW QUALITY PROTEIN: SCO-spondin [Cynoglossus semilaevis]	1573.79	1574.88	150	163	RTMHKGKGTEVCNL	0.13217	14
>Cluster-58773.176632;orf1 len=807 frame:1 start:1 end:2421 gi|657741131|ref|XP_008305640.1| PREDICTED: LOW QUALITY PROTEIN: SCO-spondin [Cynoglossus semilaevis]	1584.62	1585.61	559	572	SDDQQNNPQCSVSY	0.234897	14
>Cluster-58773.176632;orf1 len=807 frame:1 start:1 end:2421 gi|657741131|ref|XP_008305640.1| PREDICTED: LOW QUALITY PROTEIN: SCO-spondin [Cynoglossus semilaevis]	1589.79	1590.88	150	163	RTMHKGKGTEVCNL	0.13217	14
>Cluster-58773.176632;orf1 len=807 frame:1 start:1 end:2421 gi|657741131|ref|XP_008305640.1| PREDICTED: LOW QUALITY PROTEIN: SCO-spondin [Cynoglossus semilaevis]	1660.74	1661.86	135	149	STCTKVCDNGQTTRF	0.323874	15
>Cluster-58773.176632;orf1 len=807 frame:1 start:1 end:2421 gi|657741131|ref|XP_008305640.1| PREDICTED: LOW QUALITY PROTEIN: SCO-spondin [Cynoglossus semilaevis]	1995.86	1997.14	491	509	SSCDQSCGPGNQTRERTGL	0.669928	19
>Cluster-58773.176632;orf1 len=807 frame:1 start:1 end:2421 gi|657741131|ref|XP_008305640.1| PREDICTED: LOW QUALITY PROTEIN: SCO-spondin [Cynoglossus semilaevis]	2378.17	2379.7	200	221	QVRRRSCTNGVTESTKCDGKGL	0.207866	22
>Cluster-58773.176632;orf1 len=807 frame:1 start:1 end:2421 gi|657741131|ref|XP_008305640.1| PREDICTED: LOW QUALITY PROTEIN: SCO-spondin [Cynoglossus semilaevis]	2395.19	2396.73	200	221	QVRRRSCTNGVTESTKCDGKGL	0.207866	22
>tr|A0A7E6F4M5|A0A7E6F4M5_OCTVU cartilage matrix protein-like OS=Octopus vulgaris OX=6645 GN=LOC115216199 PE=4 SV=1	812.397	812.969	441	446	KKQMDF	0.506951	6
>tr|A0A7E6F4M5|A0A7E6F4M5_OCTVU cartilage matrix protein-like OS=Octopus vulgaris OX=6645 GN=LOC115216199 PE=4 SV=1	815.335	815.885	576	582	GDSSRMF	0.803931	7
>tr|A0A7E6F4M5|A0A7E6F4M5_OCTVU cartilage matrix protein-like OS=Octopus vulgaris OX=6645 GN=LOC115216199 PE=4 SV=1	911.469	911.999	139	147	TDHGGRVGI	0.14252	9
>tr|A0A7E6F4M5|A0A7E6F4M5_OCTVU cartilage matrix protein-like OS=Octopus vulgaris OX=6645 GN=LOC115216199 PE=4 SV=1	911.469	911.999	329	337	TDHGGRVGI	0.14252	9
>tr|A0A7E6F4M5|A0A7E6F4M5_OCTVU cartilage matrix protein-like OS=Octopus vulgaris OX=6645 GN=LOC115216199 PE=4 SV=1	935.422	935.975	495	502	KQSHGDTY	0.181602	8
>tr|A0A7E6F4M5|A0A7E6F4M5_OCTVU cartilage matrix protein-like OS=Octopus vulgaris OX=6645 GN=LOC115216199 PE=4 SV=1	939.442	940.003	91	98	SDNVKTEF	0.284384	8
>tr|A0A7E6F4M5|A0A7E6F4M5_OCTVU cartilage matrix protein-like OS=Octopus vulgaris OX=6645 GN=LOC115216199 PE=4 SV=1	939.442	940.003	281	288	SDNVKTEF	0.284384	8
>tr|A0A7E6F4M5|A0A7E6F4M5_OCTVU cartilage matrix protein-like OS=Octopus vulgaris OX=6645 GN=LOC115216199 PE=4 SV=1	948.511	949.058	157	166	GGSNGKSKTL	0.311327	10
>tr|A0A7E6F4M5|A0A7E6F4M5_OCTVU cartilage matrix protein-like OS=Octopus vulgaris OX=6645 GN=LOC115216199 PE=4 SV=1	978.521	979.084	347	356	SGSNGKSKTL	0.305762	10
>tr|A0A7E6F4M5|A0A7E6F4M5_OCTVU cartilage matrix protein-like OS=Octopus vulgaris OX=6645 GN=LOC115216199 PE=4 SV=1	1010.46	1011.15	216	223	EDKVMQNF	0.299183	8
>tr|A0A7E6F4M5|A0A7E6F4M5_OCTVU cartilage matrix protein-like OS=Octopus vulgaris OX=6645 GN=LOC115216199 PE=4 SV=1	1015.47	1016.07	118	126	HRGGSTNTW	0.24562	9
>tr|A0A7E6F4M5|A0A7E6F4M5_OCTVU cartilage matrix protein-like OS=Octopus vulgaris OX=6645 GN=LOC115216199 PE=4 SV=1	1015.47	1016.07	308	316	HRGGSTNTW	0.24562	9
>tr|A0A7E6F4M5|A0A7E6F4M5_OCTVU cartilage matrix protein-like OS=Octopus vulgaris OX=6645 GN=LOC115216199 PE=4 SV=1	1026.46	1027.15	216	223	EDKVMQNF	0.299183	8
>tr|A0A7E6F4M5|A0A7E6F4M5_OCTVU cartilage matrix protein-like OS=Octopus vulgaris OX=6645 GN=LOC115216199 PE=4 SV=1	1103.52	1104.17	184	193	VGNKVDDDEL	0.0754796	10
>tr|A0A7E6F4M5|A0A7E6F4M5_OCTVU cartilage matrix protein-like OS=Octopus vulgaris OX=6645 GN=LOC115216199 PE=4 SV=1	1103.52	1104.17	374	383	VGNKVDDDEL	0.0754796	10
>tr|A0A7E6F4M5|A0A7E6F4M5_OCTVU cartilage matrix protein-like OS=Octopus vulgaris OX=6645 GN=LOC115216199 PE=4 SV=1	1242.56	1243.28	52	62	DSSRSVTQTDF	0.171471	11
>tr|A0A7E6F4M5|A0A7E6F4M5_OCTVU cartilage matrix protein-like OS=Octopus vulgaris OX=6645 GN=LOC115216199 PE=4 SV=1	1242.56	1243.28	242	252	DSSRSVTQTDF	0.171471	11
>tr|A0A7E6F4M5|A0A7E6F4M5_OCTVU cartilage matrix protein-like OS=Octopus vulgaris OX=6645 GN=LOC115216199 PE=4 SV=1	1245.63	1246.38	517	528	PSNGGRPDVPHI	0.407326	12
>tr|A0A7E6F4M5|A0A7E6F4M5_OCTVU cartilage matrix protein-like OS=Octopus vulgaris OX=6645 GN=LOC115216199 PE=4 SV=1	1291.61	1292.35	533	544	TDGQSTTPRDTL	0.109757	12
>tr|A0A7E6F4M5|A0A7E6F4M5_OCTVU cartilage matrix protein-like OS=Octopus vulgaris OX=6645 GN=LOC115216199 PE=4 SV=1	1443.79	1444.64	451	463	VKDTVVGRNNTQI	0.0581478	13
>tr|A0A7E6F4M5|A0A7E6F4M5_OCTVU cartilage matrix protein-like OS=Octopus vulgaris OX=6645 GN=LOC115216199 PE=4 SV=1	1759.01	1760.23	410	425	KKKVCKRVCGVVPSDI	0.273506	16
>tr|A0A6P7TXP9|A0A6P7TXP9_OCTVU uncharacterized protein LOC115231284 OS=Octopus vulgaris OX=6645 GN=LOC115231284 PE=4 SV=1	864.497	865.089	7	14	GTCKKSKL	0.219828	8
>tr|A0A6P7TXP9|A0A6P7TXP9_OCTVU uncharacterized protein LOC115231284 OS=Octopus vulgaris OX=6645 GN=LOC115231284 PE=4 SV=1	865.394	865.92	103	110	SVDDPSVF	0.478804	8
>tr|A0A6P7TXP9|A0A6P7TXP9_OCTVU uncharacterized protein LOC115231284 OS=Octopus vulgaris OX=6645 GN=LOC115231284 PE=4 SV=1	945.574	946.15	56	63	VKHGVRHL	0.166341	8
>tr|A0A6P7TXP9|A0A6P7TXP9_OCTVU uncharacterized protein LOC115231284 OS=Octopus vulgaris OX=6645 GN=LOC115231284 PE=4 SV=1	1523.73	1524.59	80	94	RDSSVSDKSTGNGTI	0.125936	15
>tr|A0A6P7TG59|A0A6P7TG59_OCTVU 70 kDa neurofilament protein OS=Octopus vulgaris OX=6645 GN=LOC115222955 PE=3 SV=1	845.411	845.893	51	58	QSSQRSVA	0.136888	8
>tr|A0A6P7TG59|A0A6P7TG59_OCTVU 70 kDa neurofilament protein OS=Octopus vulgaris OX=6645 GN=LOC115222955 PE=3 SV=1	849.395	849.878	548	555	DDKGKESA	0.0648164	8
>tr|A0A6P7TG59|A0A6P7TG59_OCTVU 70 kDa neurofilament protein OS=Octopus vulgaris OX=6645 GN=LOC115222955 PE=3 SV=1	851.356	851.916	330	338	SDMSGQVGA	0.247222	9
>tr|A0A6P7TG59|A0A6P7TG59_OCTVU 70 kDa neurofilament protein OS=Octopus vulgaris OX=6645 GN=LOC115222955 PE=3 SV=1	862.368	862.871	144	150	EEEVEDL	0.0402779	7
>tr|A0A6P7TG59|A0A6P7TG59_OCTVU 70 kDa neurofilament protein OS=Octopus vulgaris OX=6645 GN=LOC115222955 PE=3 SV=1	862.438	862.923	51	58	QSSQRSVA	0.136888	8
>tr|A0A6P7TG59|A0A6P7TG59_OCTVU 70 kDa neurofilament protein OS=Octopus vulgaris OX=6645 GN=LOC115222955 PE=3 SV=1	867.351	867.915	330	338	SDMSGQVGA	0.247222	9
>tr|A0A6P7TG59|A0A6P7TG59_OCTVU 70 kDa neurofilament protein OS=Octopus vulgaris OX=6645 GN=LOC115222955 PE=3 SV=1	879.432	879.953	100	106	NRSQVEF	0.234599	7
>tr|A0A6P7TG59|A0A6P7TG59_OCTVU 70 kDa neurofilament protein OS=Octopus vulgaris OX=6645 GN=LOC115222955 PE=3 SV=1	904.437	904.958	127	133	EDRDKEL	0.103637	7
>tr|A0A6P7TG59|A0A6P7TG59_OCTVU 70 kDa neurofilament protein OS=Octopus vulgaris OX=6645 GN=LOC115222955 PE=3 SV=1	904.51	905.045	136	143	VKSKNESL	0.068962	8
>tr|A0A6P7TG59|A0A6P7TG59_OCTVU 70 kDa neurofilament protein OS=Octopus vulgaris OX=6645 GN=LOC115222955 PE=3 SV=1	945.464	946.011	218	225	QSETTQRL	0.220729	8
>tr|A0A6P7TG59|A0A6P7TG59_OCTVU 70 kDa neurofilament protein OS=Octopus vulgaris OX=6645 GN=LOC115222955 PE=3 SV=1	962.49	963.041	218	225	QSETTQRL	0.220729	8
>tr|A0A6P7TG59|A0A6P7TG59_OCTVU 70 kDa neurofilament protein OS=Octopus vulgaris OX=6645 GN=LOC115222955 PE=3 SV=1	1007.44	1008.04	489	497	QSQDNGKTF	0.428834	9
>tr|A0A6P7TG59|A0A6P7TG59_OCTVU 70 kDa neurofilament protein OS=Octopus vulgaris OX=6645 GN=LOC115222955 PE=3 SV=1	1007.55	1008.13	448	457	SRSKSGSVSI	0.116739	10
>tr|A0A6P7TG59|A0A6P7TG59_OCTVU 70 kDa neurofilament protein OS=Octopus vulgaris OX=6645 GN=LOC115222955 PE=3 SV=1	1024.47	1025.07	489	497	QSQDNGKTF	0.428834	9
>tr|A0A6P7TG59|A0A6P7TG59_OCTVU 70 kDa neurofilament protein OS=Octopus vulgaris OX=6645 GN=LOC115222955 PE=3 SV=1	1049.56	1050.21	257	265	SKTQKVPDF	0.176437	9
>tr|A0A6P7TG59|A0A6P7TG59_OCTVU 70 kDa neurofilament protein OS=Octopus vulgaris OX=6645 GN=LOC115222955 PE=3 SV=1	1314.69	1315.44	155	164	RQVQDERDRL	0.207396	10
>tr|A0A6P7TG59|A0A6P7TG59_OCTVU 70 kDa neurofilament protein OS=Octopus vulgaris OX=6645 GN=LOC115222955 PE=3 SV=1	1322.59	1323.37	523	535	GQGGVTSSDVTEW	0.162955	13
>tr|A0A6P7TG59|A0A6P7TG59_OCTVU 70 kDa neurofilament protein OS=Octopus vulgaris OX=6645 GN=LOC115222955 PE=3 SV=1	1436.71	1437.52	181	192	DSETSRRRTSEL	0.0854451	12
>tr|A0A6P7TG59|A0A6P7TG59_OCTVU 70 kDa neurofilament protein OS=Octopus vulgaris OX=6645 GN=LOC115222955 PE=3 SV=1	1546.65	1547.71	411	424	EGEEGRVSSMMTSF	0.316673	14
>tr|A0A6P7TG59|A0A6P7TG59_OCTVU 70 kDa neurofilament protein OS=Octopus vulgaris OX=6645 GN=LOC115222955 PE=3 SV=1	1562.65	1563.71	411	424	EGEEGRVSSMMTSF	0.316673	14
>tr|A0A6P7TG59|A0A6P7TG59_OCTVU 70 kDa neurofilament protein OS=Octopus vulgaris OX=6645 GN=LOC115222955 PE=3 SV=1	1564.8	1565.8	59	71	EMKNSSQKEKKDL	0.0924824	13
>tr|A0A6P7TG59|A0A6P7TG59_OCTVU 70 kDa neurofilament protein OS=Octopus vulgaris OX=6645 GN=LOC115222955 PE=3 SV=1	1578.64	1579.71	411	424	EGEEGRVSSMMTSF	0.316673	14
>tr|A0A6P7TG59|A0A6P7TG59_OCTVU 70 kDa neurofilament protein OS=Octopus vulgaris OX=6645 GN=LOC115222955 PE=3 SV=1	1580.79	1581.8	59	71	EMKNSSQKEKKDL	0.0924824	13
>tr|A0A6P7TG59|A0A6P7TG59_OCTVU 70 kDa neurofilament protein OS=Octopus vulgaris OX=6645 GN=LOC115222955 PE=3 SV=1	1591.81	1592.79	317	329	RVSTENRRSRMEA	0.0655317	13
>tr|A0A6P7TG59|A0A6P7TG59_OCTVU 70 kDa neurofilament protein OS=Octopus vulgaris OX=6645 GN=LOC115222955 PE=3 SV=1	1607.8	1608.79	317	329	RVSTENRRSRMEA	0.0655317	13
>tr|A0A6P7TG59|A0A6P7TG59_OCTVU 70 kDa neurofilament protein OS=Octopus vulgaris OX=6645 GN=LOC115222955 PE=3 SV=1	1974.14	1975.28	7	23	KTSKTTRRSRRGPRSSI	0.06319	17
>Cluster-58773.141566;orf1 len=422 frame:2 start:2 end:1267 gi|405964948|gb|EKC30386.1| Fructose-bisphosphate aldolase [Crassostrea gigas]	865.372	865.943	179	186	NECTTQGL	0.179684	8
>Cluster-58773.141566;orf1 len=422 frame:2 start:2 end:1267 gi|405964948|gb|EKC30386.1| Fructose-bisphosphate aldolase [Crassostrea gigas]	879.333	879.817	330	338	SGGQSEEDA	0.0811661	9
>Cluster-58773.141566;orf1 len=422 frame:2 start:2 end:1267 gi|405964948|gb|EKC30386.1| Fructose-bisphosphate aldolase [Crassostrea gigas]	903.451	904.085	295	302	GHSCPKKF	0.867784	8
>Cluster-58773.141566;orf1 len=422 frame:2 start:2 end:1267 gi|405964948|gb|EKC30386.1| Fructose-bisphosphate aldolase [Crassostrea gigas]	954.598	955.193	166	174	KVDKGVVPL	0.163139	9
>Cluster-58773.141566;orf1 len=422 frame:2 start:2 end:1267 gi|405964948|gb|EKC30386.1| Fructose-bisphosphate aldolase [Crassostrea gigas]	972.427	972.99	373	381	QGKDENVEA	0.0627644	9
>Cluster-58773.141566;orf1 len=422 frame:2 start:2 end:1267 gi|405964948|gb|EKC30386.1| Fructose-bisphosphate aldolase [Crassostrea gigas]	989.453	990.02	373	381	QGKDENVEA	0.0627644	9
>Cluster-58773.141566;orf1 len=422 frame:2 start:2 end:1267 gi|405964948|gb|EKC30386.1| Fructose-bisphosphate aldolase [Crassostrea gigas]	1040.49	1041.11	40	49	VDPDQPTTPA	0.232323	10
>Cluster-58773.141566;orf1 len=422 frame:2 start:2 end:1267 gi|405964948|gb|EKC30386.1| Fructose-bisphosphate aldolase [Crassostrea gigas]	1180.56	1181.32	92	102	DESTGSMGKRL	0.400373	11
>Cluster-58773.141566;orf1 len=422 frame:2 start:2 end:1267 gi|405964948|gb|EKC30386.1| Fructose-bisphosphate aldolase [Crassostrea gigas]	1196.56	1197.32	92	102	DESTGSMGKRL	0.400373	11
>Cluster-58773.141566;orf1 len=422 frame:2 start:2 end:1267 gi|405964948|gb|EKC30386.1| Fructose-bisphosphate aldolase [Crassostrea gigas]	1232.67	1233.41	258	268	ETSQKVTEVVL	0.0513312	11
>Cluster-58773.141566;orf1 len=422 frame:2 start:2 end:1267 gi|405964948|gb|EKC30386.1| Fructose-bisphosphate aldolase [Crassostrea gigas]	1579.76	1580.67	106	117	NVENTEENRRRY	0.07907	12
>tr|A0A7E6FIV6|A0A7E6FIV6_OCTVU short-chain collagen C4-like OS=Octopus vulgaris OX=6645 GN=LOC118767023 PE=4 SV=1	902.411	903.114	250	257	TCVVCSKY	0.13266	8
>tr|A0A7E6FIV6|A0A7E6FIV6_OCTVU short-chain collagen C4-like OS=Octopus vulgaris OX=6645 GN=LOC118767023 PE=4 SV=1	914.542	915.087	46	53	PSKTNRVI	0.140824	8
>tr|A0A7E6FIV6|A0A7E6FIV6_OCTVU short-chain collagen C4-like OS=Octopus vulgaris OX=6645 GN=LOC118767023 PE=4 SV=1	931.467	932.093	36	43	CRPETVNI	0.155133	8
>tr|A0A7E6FIV6|A0A7E6FIV6_OCTVU short-chain collagen C4-like OS=Octopus vulgaris OX=6645 GN=LOC118767023 PE=4 SV=1	1027.49	1028.11	121	129	TTEVEKTGY	0.0292212	9
>tr|A0A7E6FIV6|A0A7E6FIV6_OCTVU short-chain collagen C4-like OS=Octopus vulgaris OX=6645 GN=LOC118767023 PE=4 SV=1	1041.49	1042.11	199	206	DHKGRHEY	0.112963	8
>tr|A0A7E6FIV6|A0A7E6FIV6_OCTVU short-chain collagen C4-like OS=Octopus vulgaris OX=6645 GN=LOC118767023 PE=4 SV=1	1136.54	1137.26	78	88	GRTTCPTNSSL	0.179634	11
>tr|A0A7E6FIV6|A0A7E6FIV6_OCTVU short-chain collagen C4-like OS=Octopus vulgaris OX=6645 GN=LOC118767023 PE=4 SV=1	1538.73	1539.65	59	73	DDKPDDTPKPGPGSL	0.568217	15
>Cluster-58773.60962;orf1 len=390 frame:3 start:534 end:1703 gi|762116501|ref|XP_011441088.1| PREDICTED: collagen alpha-4(VI) chain-like [Crassostrea gigas]	803.412	803.858	112	119	KNGGRSNA	0.115114	8
>Cluster-58773.60962;orf1 len=390 frame:3 start:534 end:1703 gi|762116501|ref|XP_011441088.1| PREDICTED: collagen alpha-4(VI) chain-like [Crassostrea gigas]	806.327	806.768	127	134	TDGNSNQA	0.066027	8
>Cluster-58773.60962;orf1 len=390 frame:3 start:534 end:1703 gi|762116501|ref|XP_011441088.1| PREDICTED: collagen alpha-4(VI) chain-like [Crassostrea gigas]	846.41	846.923	363	369	SDNKHVF	0.45291	7
>Cluster-58773.60962;orf1 len=390 frame:3 start:534 end:1703 gi|762116501|ref|XP_011441088.1| PREDICTED: collagen alpha-4(VI) chain-like [Crassostrea gigas]	868.475	868.977	304	311	VHGSRKNA	0.106468	8
>Cluster-58773.60962;orf1 len=390 frame:3 start:534 end:1703 gi|762116501|ref|XP_011441088.1| PREDICTED: collagen alpha-4(VI) chain-like [Crassostrea gigas]	892.475	892.999	258	264	SNVRNRF	0.570143	7
>Cluster-58773.60962;orf1 len=390 frame:3 start:534 end:1703 gi|762116501|ref|XP_011441088.1| PREDICTED: collagen alpha-4(VI) chain-like [Crassostrea gigas]	943.521	944.082	136	143	QTVRESKL	0.0590612	8
>Cluster-58773.60962;orf1 len=390 frame:3 start:534 end:1703 gi|762116501|ref|XP_011441088.1| PREDICTED: collagen alpha-4(VI) chain-like [Crassostrea gigas]	945.548	946.101	63	70	STKVRNQI	0.052261	8
>Cluster-58773.60962;orf1 len=390 frame:3 start:534 end:1703 gi|762116501|ref|XP_011441088.1| PREDICTED: collagen alpha-4(VI) chain-like [Crassostrea gigas]	960.547	961.113	136	143	QTVRESKL	0.0590612	8
>Cluster-58773.60962;orf1 len=390 frame:3 start:534 end:1703 gi|762116501|ref|XP_011441088.1| PREDICTED: collagen alpha-4(VI) chain-like [Crassostrea gigas]	1009.44	1010.01	319	328	TDGQSDSKTA	0.079952	10
>Cluster-58773.60962;orf1 len=390 frame:3 start:534 end:1703 gi|762116501|ref|XP_011441088.1| PREDICTED: collagen alpha-4(VI) chain-like [Crassostrea gigas]	1052.57	1053.21	169	177	SSDKKKNVF	0.393241	9
>Cluster-58773.60962;orf1 len=390 frame:3 start:534 end:1703 gi|762116501|ref|XP_011441088.1| PREDICTED: collagen alpha-4(VI) chain-like [Crassostrea gigas]	1116.56	1117.21	348	358	GVGQSVDRGEL	0.235315	11
>Cluster-58773.60962;orf1 len=390 frame:3 start:534 end:1703 gi|762116501|ref|XP_011441088.1| PREDICTED: collagen alpha-4(VI) chain-like [Crassostrea gigas]	1494.75	1495.75	199	213	TTPPPPVCGVTPTDI	0.280886	15
>tr|A0A6P7T9Q3|A0A6P7T9Q3_OCTVU short-chain collagen C4-like isoform X1 OS=Octopus vulgaris OX=6645 GN=LOC115221572 PE=4 SV=2	848.375	848.85	144	152	NETGGGSNL	0.107048	9
>tr|A0A6P7T9Q3|A0A6P7T9Q3_OCTVU short-chain collagen C4-like isoform X1 OS=Octopus vulgaris OX=6645 GN=LOC115221572 PE=4 SV=2	892.373	892.974	198	205	HDHNVPCA	0.474871	8
>tr|A0A6P7T9Q3|A0A6P7T9Q3_OCTVU short-chain collagen C4-like isoform X1 OS=Octopus vulgaris OX=6645 GN=LOC115221572 PE=4 SV=2	902.411	903.114	293	300	TCVVCSKY	0.13266	8
>tr|A0A6P7T9Q3|A0A6P7T9Q3_OCTVU short-chain collagen C4-like isoform X1 OS=Octopus vulgaris OX=6645 GN=LOC115221572 PE=4 SV=2	1193.62	1194.34	62	72	VHTPTSQDPVL	0.115384	11
>tr|A0A6P7T9Q3|A0A6P7T9Q3_OCTVU short-chain collagen C4-like isoform X1 OS=Octopus vulgaris OX=6645 GN=LOC115221572 PE=4 SV=2	1218.64	1219.42	122	132	GRTKCPRNSSL	0.34841	11
>tr|A0A6P7T9Q3|A0A6P7T9Q3_OCTVU short-chain collagen C4-like isoform X1 OS=Octopus vulgaris OX=6645 GN=LOC115221572 PE=4 SV=2	1427.59	1428.66	73	86	GPCMPGGMQQDVHA	0.334595	14
>tr|A0A6P7T9Q3|A0A6P7T9Q3_OCTVU short-chain collagen C4-like isoform X1 OS=Octopus vulgaris OX=6645 GN=LOC115221572 PE=4 SV=2	1443.58	1444.66	73	86	GPCMPGGMQQDVHA	0.334595	14
[truncated: 13,359 more rows]

## Sheet: Trypsin
Protein	m/z (mi)	m/z (av)	Start	End	Sequence	Peptide Ranker Score	Lenght
>tr|A0A6P7SER3|A0A6P7SER3_OCTVU hemocyanin 1-like OS=Octopus vulgaris OX=6645 GN=LOC115212215 PE=4 SV=2	811.325	811.851	4205	4211	DMTTDGR	0.194292	7
>tr|A0A6P7SER3|A0A6P7SER3_OCTVU hemocyanin 1-like OS=Octopus vulgaris OX=6645 GN=LOC115212215 PE=4 SV=2	859.5	860.007	1	8	SISGNLIR	0.401288	8
>tr|A0A6P7SER3|A0A6P7SER3_OCTVU hemocyanin 1-like OS=Octopus vulgaris OX=6645 GN=LOC115212215 PE=4 SV=2	862.503	863.051	570	576	LFEKPTK	0.239295	7
>tr|A0A6P7SER3|A0A6P7SER3_OCTVU hemocyanin 1-like OS=Octopus vulgaris OX=6645 GN=LOC115212215 PE=4 SV=2	862.503	863.051	3492	3498	LFEKPTK	0.239295	7
>tr|A0A6P7SER3|A0A6P7SER3_OCTVU hemocyanin 1-like OS=Octopus vulgaris OX=6645 GN=LOC115212215 PE=4 SV=2	870.468	870.987	2401	2408	TSADVHLK	0.131057	8
>tr|A0A6P7SER3|A0A6P7SER3_OCTVU hemocyanin 1-like OS=Octopus vulgaris OX=6645 GN=LOC115212215 PE=4 SV=2	870.468	870.987	5323	5330	TSADVHLK	0.131057	8
>tr|A0A6P7SER3|A0A6P7SER3_OCTVU hemocyanin 1-like OS=Octopus vulgaris OX=6645 GN=LOC115212215 PE=4 SV=2	898.442	899	1659	1666	QGHLADFK	0.500382	8
>tr|A0A6P7SER3|A0A6P7SER3_OCTVU hemocyanin 1-like OS=Octopus vulgaris OX=6645 GN=LOC115212215 PE=4 SV=2	898.442	899	4581	4588	QGHLADFK	0.500382	8
>tr|A0A6P7SER3|A0A6P7SER3_OCTVU hemocyanin 1-like OS=Octopus vulgaris OX=6645 GN=LOC115212215 PE=4 SV=2	901.51	902.044	1	8	SISGNLIR	0.401288	8
>tr|A0A6P7SER3|A0A6P7SER3_OCTVU hemocyanin 1-like OS=Octopus vulgaris OX=6645 GN=LOC115212215 PE=4 SV=2	913.547	914.099	2502	2510	IAAEGAIIR	0.255735	9
>tr|A0A6P7SER3|A0A6P7SER3_OCTVU hemocyanin 1-like OS=Octopus vulgaris OX=6645 GN=LOC115212215 PE=4 SV=2	913.547	914.099	5424	5432	IAAEGAIIR	0.255735	9
>tr|A0A6P7SER3|A0A6P7SER3_OCTVU hemocyanin 1-like OS=Octopus vulgaris OX=6645 GN=LOC115212215 PE=4 SV=2	915.468	916.03	1659	1666	QGHLADFK	0.500382	8
>tr|A0A6P7SER3|A0A6P7SER3_OCTVU hemocyanin 1-like OS=Octopus vulgaris OX=6645 GN=LOC115212215 PE=4 SV=2	915.468	916.03	4581	4588	QGHLADFK	0.500382	8
>tr|A0A6P7SER3|A0A6P7SER3_OCTVU hemocyanin 1-like OS=Octopus vulgaris OX=6645 GN=LOC115212215 PE=4 SV=2	922.551	923.153	2799	2806	VFAGFLLR	0.873199	8
>tr|A0A6P7SER3|A0A6P7SER3_OCTVU hemocyanin 1-like OS=Octopus vulgaris OX=6645 GN=LOC115212215 PE=4 SV=2	922.551	923.153	5721	5728	VFAGFLLR	0.873199	8
>tr|A0A6P7SER3|A0A6P7SER3_OCTVU hemocyanin 1-like OS=Octopus vulgaris OX=6645 GN=LOC115212215 PE=4 SV=2	926.433	926.967	2792	2798	EIQHEDR	0.0708055	7
>tr|A0A6P7SER3|A0A6P7SER3_OCTVU hemocyanin 1-like OS=Octopus vulgaris OX=6645 GN=LOC115212215 PE=4 SV=2	926.433	926.967	5714	5720	EIQHEDR	0.0708055	7
>tr|A0A6P7SER3|A0A6P7SER3_OCTVU hemocyanin 1-like OS=Octopus vulgaris OX=6645 GN=LOC115212215 PE=4 SV=2	926.469	927.011	1166	1174	AHGATDQVK	0.121467	9
>tr|A0A6P7SER3|A0A6P7SER3_OCTVU hemocyanin 1-like OS=Octopus vulgaris OX=6645 GN=LOC115212215 PE=4 SV=2	926.469	927.011	4088	4096	AHGATDQVK	0.121467	9
>tr|A0A6P7SER3|A0A6P7SER3_OCTVU hemocyanin 1-like OS=Octopus vulgaris OX=6645 GN=LOC115212215 PE=4 SV=2	926.483	927.048	5772	5779	YDITSSLK	0.129729	8
>tr|A0A6P7SER3|A0A6P7SER3_OCTVU hemocyanin 1-like OS=Octopus vulgaris OX=6645 GN=LOC115212215 PE=4 SV=2	931.449	931.992	298	304	EHQQHPR	0.208421	7
>tr|A0A6P7SER3|A0A6P7SER3_OCTVU hemocyanin 1-like OS=Octopus vulgaris OX=6645 GN=LOC115212215 PE=4 SV=2	931.449	931.992	3220	3226	EHQQHPR	0.208421	7
>tr|A0A6P7SER3|A0A6P7SER3_OCTVU hemocyanin 1-like OS=Octopus vulgaris OX=6645 GN=LOC115212215 PE=4 SV=2	940.499	941.075	2850	2857	YDITTSLK	0.105251	8
>tr|A0A6P7SER3|A0A6P7SER3_OCTVU hemocyanin 1-like OS=Octopus vulgaris OX=6645 GN=LOC115212215 PE=4 SV=2	947.443	947.983	2095	2102	NVDSLDER	0.148285	8
>tr|A0A6P7SER3|A0A6P7SER3_OCTVU hemocyanin 1-like OS=Octopus vulgaris OX=6645 GN=LOC115212215 PE=4 SV=2	947.443	947.983	5017	5024	NVDSLDER	0.148285	8
>tr|A0A6P7SER3|A0A6P7SER3_OCTVU hemocyanin 1-like OS=Octopus vulgaris OX=6645 GN=LOC115212215 PE=4 SV=2	961.429	962.073	414	422	DADMAPVDK	0.244536	9
>tr|A0A6P7SER3|A0A6P7SER3_OCTVU hemocyanin 1-like OS=Octopus vulgaris OX=6645 GN=LOC115212215 PE=4 SV=2	977.424	978.072	414	422	DADMAPVDK	0.244536	9
>tr|A0A6P7SER3|A0A6P7SER3_OCTVU hemocyanin 1-like OS=Octopus vulgaris OX=6645 GN=LOC115212215 PE=4 SV=2	988.531	989.12	253	261	DTNPISLTK	0.148554	9
>tr|A0A6P7SER3|A0A6P7SER3_OCTVU hemocyanin 1-like OS=Octopus vulgaris OX=6645 GN=LOC115212215 PE=4 SV=2	988.531	989.12	3175	3183	DTNPISLTK	0.148554	9
>tr|A0A6P7SER3|A0A6P7SER3_OCTVU hemocyanin 1-like OS=Octopus vulgaris OX=6645 GN=LOC115212215 PE=4 SV=2	989.436	990.086	3336	3344	DADMAPVDR	0.379712	9
>tr|A0A6P7SER3|A0A6P7SER3_OCTVU hemocyanin 1-like OS=Octopus vulgaris OX=6645 GN=LOC115212215 PE=4 SV=2	1005.43	1006.09	3336	3344	DADMAPVDR	0.379712	9
>tr|A0A6P7SER3|A0A6P7SER3_OCTVU hemocyanin 1-like OS=Octopus vulgaris OX=6645 GN=LOC115212215 PE=4 SV=2	1009.52	1010.14	1612	1619	YEITDQLK	0.0884679	8
>tr|A0A6P7SER3|A0A6P7SER3_OCTVU hemocyanin 1-like OS=Octopus vulgaris OX=6645 GN=LOC115212215 PE=4 SV=2	1009.52	1010.14	4534	4541	YEITDQLK	0.0884679	8
>tr|A0A6P7SER3|A0A6P7SER3_OCTVU hemocyanin 1-like OS=Octopus vulgaris OX=6645 GN=LOC115212215 PE=4 SV=2	1014.47	1015.14	471	479	CPEPDAINR	0.581859	9
>tr|A0A6P7SER3|A0A6P7SER3_OCTVU hemocyanin 1-like OS=Octopus vulgaris OX=6645 GN=LOC115212215 PE=4 SV=2	1014.47	1015.14	3393	3401	CPEPDAINR	0.581859	9
>tr|A0A6P7SER3|A0A6P7SER3_OCTVU hemocyanin 1-like OS=Octopus vulgaris OX=6645 GN=LOC115212215 PE=4 SV=2	1038.55	1039.18	4307	4315	ISFLNSETK	0.143635	9
>tr|A0A6P7SER3|A0A6P7SER3_OCTVU hemocyanin 1-like OS=Octopus vulgaris OX=6645 GN=LOC115212215 PE=4 SV=2	1046.52	1047.22	322	331	VAVCVPTDDK	0.121497	10
>tr|A0A6P7SER3|A0A6P7SER3_OCTVU hemocyanin 1-like OS=Octopus vulgaris OX=6645 GN=LOC115212215 PE=4 SV=2	1046.52	1047.22	3244	3253	VAVCVPTDDK	0.121497	10
>tr|A0A6P7SER3|A0A6P7SER3_OCTVU hemocyanin 1-like OS=Octopus vulgaris OX=6645 GN=LOC115212215 PE=4 SV=2	1052.49	1053.12	860	868	ALQAYEDDK	0.130294	9
>tr|A0A6P7SER3|A0A6P7SER3_OCTVU hemocyanin 1-like OS=Octopus vulgaris OX=6645 GN=LOC115212215 PE=4 SV=2	1052.49	1053.12	3782	3790	ALQAYEDDK	0.130294	9
>tr|A0A6P7SER3|A0A6P7SER3_OCTVU hemocyanin 1-like OS=Octopus vulgaris OX=6645 GN=LOC115212215 PE=4 SV=2	1062.51	1063.16	2637	2645	AQLFDDPEK	0.357011	9
>tr|A0A6P7SER3|A0A6P7SER3_OCTVU hemocyanin 1-like OS=Octopus vulgaris OX=6645 GN=LOC115212215 PE=4 SV=2	1062.51	1063.16	5559	5567	AQLFDDPEK	0.357011	9
>tr|A0A6P7SER3|A0A6P7SER3_OCTVU hemocyanin 1-like OS=Octopus vulgaris OX=6645 GN=LOC115212215 PE=4 SV=2	1073.51	1074.31	2898	2906	GHLEEVMMK	0.304724	9
>tr|A0A6P7SER3|A0A6P7SER3_OCTVU hemocyanin 1-like OS=Octopus vulgaris OX=6645 GN=LOC115212215 PE=4 SV=2	1089.51	1090.31	2898	2906	GHLEEVMMK	0.304724	9
>tr|A0A6P7SER3|A0A6P7SER3_OCTVU hemocyanin 1-like OS=Octopus vulgaris OX=6645 GN=LOC115212215 PE=4 SV=2	1093.58	1094.33	2440	2448	MDITHVIHK	0.123338	9
>tr|A0A6P7SER3|A0A6P7SER3_OCTVU hemocyanin 1-like OS=Octopus vulgaris OX=6645 GN=LOC115212215 PE=4 SV=2	1093.58	1094.33	5362	5370	MDITHVIHK	0.123338	9
>tr|A0A6P7SER3|A0A6P7SER3_OCTVU hemocyanin 1-like OS=Octopus vulgaris OX=6645 GN=LOC115212215 PE=4 SV=2	1105.5	1106.31	2898	2906	GHLEEVMMK	0.304724	9
>tr|A0A6P7SER3|A0A6P7SER3_OCTVU hemocyanin 1-like OS=Octopus vulgaris OX=6645 GN=LOC115212215 PE=4 SV=2	1109.58	1110.33	2440	2448	MDITHVIHK	0.123338	9
>tr|A0A6P7SER3|A0A6P7SER3_OCTVU hemocyanin 1-like OS=Octopus vulgaris OX=6645 GN=LOC115212215 PE=4 SV=2	1109.58	1110.33	5362	5370	MDITHVIHK	0.123338	9
>tr|A0A6P7SER3|A0A6P7SER3_OCTVU hemocyanin 1-like OS=Octopus vulgaris OX=6645 GN=LOC115212215 PE=4 SV=2	1122.56	1123.32	1938	1946	LSKPEDMFR	0.681946	9
>tr|A0A6P7SER3|A0A6P7SER3_OCTVU hemocyanin 1-like OS=Octopus vulgaris OX=6645 GN=LOC115212215 PE=4 SV=2	1122.56	1123.32	4860	4868	LSKPEDMFR	0.681946	9
>tr|A0A6P7SER3|A0A6P7SER3_OCTVU hemocyanin 1-like OS=Octopus vulgaris OX=6645 GN=LOC115212215 PE=4 SV=2	1138.56	1139.32	1938	1946	LSKPEDMFR	0.681946	9
>tr|A0A6P7SER3|A0A6P7SER3_OCTVU hemocyanin 1-like OS=Octopus vulgaris OX=6645 GN=LOC115212215 PE=4 SV=2	1138.56	1139.32	4860	4868	LSKPEDMFR	0.681946	9
>tr|A0A6P7SER3|A0A6P7SER3_OCTVU hemocyanin 1-like OS=Octopus vulgaris OX=6645 GN=LOC115212215 PE=4 SV=2	1154.55	1155.22	1667	1676	HEESNGNLVR	0.167621	10
>tr|A0A6P7SER3|A0A6P7SER3_OCTVU hemocyanin 1-like OS=Octopus vulgaris OX=6645 GN=LOC115212215 PE=4 SV=2	1154.55	1155.22	4589	4598	HEESNGNLVR	0.167621	10
>tr|A0A6P7SER3|A0A6P7SER3_OCTVU hemocyanin 1-like OS=Octopus vulgaris OX=6645 GN=LOC115212215 PE=4 SV=2	1180.6	1181.3	1385	1394	ISFLNSETNR	0.177854	10
>tr|A0A6P7SER3|A0A6P7SER3_OCTVU hemocyanin 1-like OS=Octopus vulgaris OX=6645 GN=LOC115212215 PE=4 SV=2	1188.55	1189.27	2861	2870	LDAHDDFDIK	0.484096	10
[truncated: 23,938 more rows]
