# Supplementary material for: Identifying Natural Bioactive Peptides from the Common Octopus (Octopus vulgaris Cuvier, 1797) Skin Mucus By-Products Using Proteogenomic Analysis
Source: Int J Mol Sci. 2023 Apr 12;24(8):7145. doi: 10.3390/ijms24087145 (PMC10138644; doi:10.3390/ijms24087145)
Supplement: Supplementary file 1 [file ijms-24-07145-s001.zip › Table S5. Selected potential bioactive peptides of O. vulgaris skin mucus proteome predicted by in-silico digestions with pepsin and trypsin.xlsx]

## Sheet: Pepsin
Proteins	Peptides	PeptideRanker Score	Anti-Microbial Peptide (AMP)	Discriminant Score for AMP
Uncharacterized protein OS=Octopus vulgaris	ECSNGGKCVDGKCVCPKNKKGMDCSI	0.997209	AMP	0.985
Progranulin OS=Octopus vulgaris	PCCCCCCCRCCY	0.99494	AMP	1
Uncharacterized protein OS=Octopus vulgaris	CTDDCNGNGECVKGECVCNGDY	0.993997	AMP	0.878
TLS OS=Sepia pharaonis	GPGGPPGGPGGF	0.975403	NAMP	0.491
Metalloendopeptidase OS=Octopus vulgaris	HCKKSCKKCGDGGGGGGGGGGGGKGCVDENKL	0.969794	AMP	0.989
Titin OS=Octopus vulgaris	PPPPSHPPPF	0.959345	AMP	0.99
SCO-spondin OS=Octopus vulgaris	DQCGCPEGKVMSHNGGCVEKDDCPCKY	0.953436	NAMP	0.393
Ganglioside GM2 activator OS=Octopus vulgaris	PQCPQPF	0.947135	AMP	0.517
Neuroblast differentiation-associated protein AHNAK isoform X37 OS=Octopus vulgaris	MCPMRNPF	0.947113	NAMP	0.047
Prominin-1 OS=Octopus vulgaris	CCCRNCNKCGGKRI	0.945806	AMP	0.972
Metalloendopeptidase OS=Octopus vulgaris	KCKKSCKQCQKCDDKNSHCSY	0.943102	AMP	0.996
MAM and LDL-receptor class A domain-containing protein 2-like OS=Octopus vulgaris	SRCNCCCGGMVCA	0.942452	AMP	0.674
Uncharacterized protein OS=Sepia pharaonis	SDPMRPF	0.938433	AMP	0.879
Choline transporter-like protein OS=Octopus vulgaris	KCMKCCF	0.934387	AMP	0.989
Probable chitinase 10 OS=Octopus vulgaris	CDPDPNF	0.93268	AMP	0.717
Uncharacterized protein OS=Sepia pharaonis	KKPMMPF	0.932566	AMP	0.978
NADH-cytochrome b5 reductase OS=Octopus vulgaris	MCGPPPMI	0.930352	NAMP	0.002
Heat shock cognate 71 kDa protein OS=Octopus vulgaris	GGMPGGMPGGMPGGMPNF	0.92432	AMP	0.504
Papilin isoform X2 OS=Octopus vulgaris	TDGVCSRTCGGGVMKSTRTCEDRSNKGCL	0.919668	NAMP	0.153
Uncharacterized protein OS=Octopus vulgaris	CSCMDGQEMCF	0.916491	NAMP	0.039
Collagen alpha-4(IV) chain OS=Octopus vulgaris	PPGPPGVPGL	0.914549	NAMP	0.009
Heterogeneous nuclear ribonucleoprotein U-like protein 1 isoform X3 OS=Octopus vulgaris	PPPSKRF	0.911736	AMP	0.983
Uncharacterized protein LOC115214454 OS=Octopus vulgaris	MQMPPKF	0.911166	AMP	0.977
Mucin-19-like OS=Octopus vulgaris	NPCCPVCKL	0.906944	AMP	0.556
Uncharacterized protein OS=Octopus vulgaris	CPNDCSGF	0.905014	NAMP	0.027
Sushi, von Willebrand factor type A, EGF and pentraxin domain-containing protein 1 isoform X1 OS=Octopus vulgaris	CSPSPKCEPKQCL	0.903625	NAMP	0.456
Hemocyanin G-type, units Oda to Odg-like OS=Octopus vulgaris	NQPMRPF	0.902663	AMP	0.97

## Sheet: Trypsin
	Table S5: Selected potential bioactive peptides of O. vulgaris skin mucus proteome predicted by in-silico digestions with pepsin and trypsin.
Protein	Sequence	PeptideRanker Score	Anti-Microbial Peptide (AMP)	Discriminant Score for AMP
Uncharacterized protein OS=Octopus vulgaris	MQNFLAICLILSLGIVFCNSACICGDKPFCR	0.99974	AMP	0.743
Uncharacterized protein OS=Octopus vulgaris	MYTQSFFIVCCLSSLLCFISAGDPPSCTHK	0.999512	NAMP	0.007
Prominin-1 OS=Octopus vulgaris	NIGFVVAIAVGILFIIIFTLVGMCFCCCR	0.999292	NAMP	0.3
Progranulin isoform X1 OS=Octopus vulgaris	VATCTNGTCCLIGPNEYACCIYK	0.999155	AMP	0.955
Monocarboxylate transporter 9-like OS=Octopus vulgaris	MYIFSMLVLTICVIMVPHCDK	0.999155	NAMP	0.002
Choline transporter-like protein OS=Octopus vulgaris	WVAGIMVWFGVIAFLVLFAAGCGVSAWK	0.999117	AMP	0.652
Metalloendopeptidase OS=Octopus vulgaris	MSGTLIFLTISLAICCAPILGTDPNGFDER	0.999097	NAMP	0.009
Choline transporter-like protein OS=Octopus vulgaris	SCTDIICCIIFIIFLVAFAGVSIFAYVK	0.998954	NAMP	0.407
Adhesion G protein-coupled receptor A2-like isoform X2 OS=Octopus vulgaris	NNTLTCNELTSGSTCVACCIGNLCNK	0.998946	AMP	0.958
Uncharacterized protein LOC115222714 OS=Octopus vulgaris	GTLLFGLLVLCSVLSISFSTCTHK	0.998668	AMP	0.99
LOW QUALITY PROTEIN: uncharacterized protein OS=Crassostrea gigas	NMSFNSLFLVWLGILGCAFGSTR	0.998493	NAMP	0.157
Collagen alpha-1(XII) chain-like OS=Octopus vulgaris	MHSLYWFALLLCGGSLAAKPDLMDCK	0.998096	NAMP	0.012
Cysteine proteases inhibitor OS=Haliotis discus hannai	SVTMLLSSFTPLLALVCAAVAATTAPAVDK	0.99779	NAMP	0.037
Protein-glucosylgalactosylhydroxylysine glucosidase isoform X2 OS=Octopus vulgaris	MLLVVCLLLLTCLTGQVSATSDSYSSTR	0.99758	NAMP	0.021
SCO-spondin-like OS=Octopus vulgaris	VDCTDGSDELYCNILCNASQFTCNNGQCINK	0.997103	AMP	0.931
Uncharacterized protein OS=Octopus vulgaris	TPCGAIQCYNGGTCNSNMCSCTNGYSGEFCQK	0.996807	AMP	0.849
Uncharacterized protein OS=Octopus vulgaris	LLLCLALSVLLYNIGQVSASCAPCK	0.996756	AMP	0.957
Monocarboxylate transporter 9-like OS=Octopus vulgaris	GTLLLISGLLLNFIVYGSLCRPLPSTYTDAK	0.996707	NAMP	0.305
Carbonic anhydrase OS=Octopus vulgaris	MTSTTYITLICLAFVGAATAGSDWSYK	0.996289	NAMP	0.018
Uncharacterized protein OS=Octopus vulgaris	CQSHGTCVNGTCICSEGYAGVDCSENIK	0.995774	AMP	0.939
Mucin-like protein OS=Octopus vulgaris	TAAIVIGVVLGILCLLLIGVIVYIIR	0.995575	NAMP	0.001
Hypothetical protein OS=Lottia gigantea	LFLGFLLLCVTCLSAFALENSYLIK	0.99555	AMP	0.62
40S ribosomal protein S27 OS=Octopus bimaculoides	ITTVFSHAQTVVLCVGCSTVLCQPTGGK	0.995545	AMP	0.87
Neuroglian-like isoform X4 OS=Crassostrea gigas	WIALIVALVLFFIIFILLLCILFNR	0.995036	NAMP	0
Hypothetical protein OS=Lottia gigantea	TAAFCLLLSVGLVGAAYEAYCR	0.994965	NAMP	0.346
Mucin-like protein OS=Octopus vulgaris	GDNCSIDINECLLSSSVCDLNTTTCENVFGSYYCK	0.994957	AMP	0.677
RING-type E3 ubiquitin transferase OS=Octopus vulgaris	QATVLFQPCCHVLICEVCNER	0.994947	AMP	0.543
Insulin-like growth factor-binding protein complex acid labile subunit isoform X1 OS=Octopus vulgaris	LTFALILSMSFCLESNAASDICSTCSCR	0.994916	AMP	0.588
Uncharacterized protein OS=Octopus vulgaris	NFIIFIAVIAVLVCILIITIILFYASNR	0.994583	NAMP	0.043
Nucleolin isoform X3 OS=Octopus vulgaris	LSHDSGCCNGFPGLCASWCQPGLTTTPTNR	0.994454	NAMP	0.22
Hyaluronidase OS=Octopus vulgaris	MFSLNLVWILCVIFISPGTSLSEK	0.994141	NAMP	0.017
Mucin-19-like OS=Octopus vulgaris	EIVETSQTCCDGWTGQYCNIPICTIACK	0.993863	AMP	0.956
Chitinase OS=Octopus vulgaris	MLLSLIICLSAVMAIQAIDIPNNAR	0.99382	NAMP	0.105
Hemocyanin G-type OS=Enteroctopus dofleini	IPCLFAIVFAFWLCGHIAEGNLIR	0.993578	AMP	0.59
SCO-spondin-like OS=Octopus vulgaris	TYLGLLAWICCGYIAFVATSDGDLR	0.993515	NAMP	0.375
Calumenin-like isoform X2 OS=Aplysia californica	YYSFFLTIFLFATTLCSTIPKPK	0.993298	NAMP	0.06
Neprilysin isoform X2 OS=Octopus vulgaris	WLTVILVILIICILGLIIAVIVLAIPK	0.993137	NAMP	0
Chymotrypsin-1 isoform X3 OS=Octopus vulgaris	MLSLCCLLVTVASVFAAPETQIVGGSK	0.993	NAMP	0.084
Hypothetical protein OS=Lottia gigantea	QSCIGLILGTGCNVCYIENVK	0.992983	AMP	0.699
Uncharacterized protein OS=Octopus vulgaris	ILCGCIFAVTIFLWIPSSYGK	0.99227	AMP	0.787
Mucin-like protein OS=Octopus vulgaris	VSCLYHGDDMCIINQNVCSVNAICSSLNENYTCTCK	0.991951	AMP	0.724
Transketolase OS=Octopus vulgaris	FIECYIAEQNLVGVGIGCACR	0.991698	AMP	0.929
Peroxidase-like protein, partial OS=Euprymna scolopes	TTMIRPSLILLLAILPCIVLCLTPLQDK	0.990735	NAMP	0.018
Uncharacterized protein OS=Octopus vulgaris	LVLVGIILLLLALAAGLITTIILLTK	0.989329	NAMP	0.037
Uncharacterized protein OS=Octopus vulgaris	MAISVILLPCIFFAMAVGFSK	0.98921	NAMP	0.098
Hemocyanin G-type, units Oda to Odg-like OS=Octopus vulgaris	SPWLLGATILCIISIFVPVITNGK	0.989103	AMP	0.813
Short-chain collagen C4-like isoform X1 OS=Octopus vulgaris	DENGALLYFVGAVCGSLPCPPYVYGR	0.988907	NAMP	0.281
Mucin-17-like OS=Crassostrea gigas	IASFGICTECTVMLNYCYGVVR	0.988637	NAMP	0.297
Full=Hephaestin-like protein SO=Acropora millepora	NMSHSLWTSFFLCMLGIVSQVK	0.987807	NAMP	0.139
Uncharacterized protein OS=Octopus bimaculoides	LALVLLVLLPLALSASLGESESETAK	0.987554	AMP	0.558
Uncharacterized protein OS=Octopus vulgaris	MGLLQVFLLSALVAAGQAGPIK	0.987388	AMP	0.866
Lysozyme OS=Octopus vulgaris	MLYFSVYNYFLAVVLYLITTK	0.987175	NAMP	0.054
Uncharacterized protein OS=Octopus vulgaris	IGCFEFNCFCNTDGSWECLAEGIAYICDR	0.987086	AMP	0.911
Hypothetical protein OS=Lottia gigantea	YIFLIALSVVAASALTCPPNACK	0.986806	AMP	0.915
Uncharacterized protein OS=Octopus vulgaris	MTLATLPWSCFILWLLLVSSQALLISNTNGFLR	0.986593	NAMP	0.016
Choline transporter-like protein OS=Octopus vulgaris	DVMTSWWIILVALIIAMFVSLLWIFLMR	0.986066	NAMP	0.016
Uncharacterized protein OS=Octopus vulgaris	DFFPFLR	0.985801	NAMP	0.013
Uncharacterized protein OS=Octopus vulgaris	LGDVHCNCTEGFAGVGCELSVDYCK	0.985134	AMP	0.808
Uncharacterized protein OS=Strongylocentrotus purpuratus	NMSFGIVLLFVTVVSSLVTAAPLNK	0.985055	AMP	0.544
Uncharacterized protein OS=Octopus vulgaris	QHTFWLSLILLHVLFIIPSYSQESCTETGDYK	0.984953	NAMP	0.003
Short-chain collagen C4-like isoform X1 OS=Octopus vulgaris	FSVSSFITFGLCLVLTITILHFDAR	0.984894	NAMP	0.03
Tetraspanin OS=Octopus vulgaris	IAAAGLALAFIQVIGIVFACCLAQAIR	0.984503	AMP	0.744
LRRCT domain-containing protein OS=Octopus bimaculoides	QFVVFLCYHMLLILTIEVPVFVSYR	0.984108	NAMP	0.002
Mucin-19-like OS=Octopus vulgaris	CCIFDTWSFWSSCDQSCGPGNQTR	0.983652	AMP	0.83
Hyaluronidase OS=Octopus vulgaris	WGFYGFPR	0.983465	NAMP	0.049
Hypothetical protein OS=Lottia gigantea	YIFLIALSVVAASAIVCPPDACK	0.982641	AMP	0.822
Uncharacterized protein OS=Octopus vulgaris	SFLFFR	0.982441	NAMP	0.198
Uncharacterized protein OS=Octopus bimaculoides	DENGALLYFVQGVCGSLPCPPYVNGQELSCVVCSK	0.982031	AMP	0.554
SCO-spondin-like OS=Octopus vulgaris	TFYDDCVQDACGCDTGGDCECLCAAISNFADMCSR	0.981856	AMP	0.818
Hypothetical protein LOTGIDRAFT_233460 OS=Lottia gigantea	HNHINMNYTFVVIFLVCLIGCDAQVYTEQDLVK	0.980787	NAMP	0.003
Short-chain collagen C4-like isoform X1 OS=Octopus vulgaris	NEGGALLYFVEGVCGSLPCPPYVYGR	0.980449	NAMP	0.267
Hypothetical protein OS=Lottia gigantea	LVLFSLPLLILSVLSPGCAGR	0.979985	AMP	0.858
Uncharacterized protein LOC115222051 isoform X1 OS=Octopus vulgaris	FIEGCYEYLCNCYCDGSWTCPDNLSVNTCK	0.979387	AMP	0.89
Short-chain collagen C4-like OS=Octopus vulgaris	DDGGAVLYFVQSVCGSLPCPPYVK	0.978133	NAMP	0.429
Astacin-like metalloprotease OS=Sepiella maindroni	INMQGTILWTVSLWLGLVGAIPIVLK	0.97807	AMP	0.91
Hemocyanin G-type (Fragment) OS=Enteroctopus dofleini	ILCLFAFVFAFWLSGQSAEGNLIR	0.977782	AMP	0.551
Lysozyme OS=Octopus vulgaris	CLQCLCDIETSCKPADCYGGDGPITCGYFHISK	0.976987	AMP	0.978
Ecdysteroid-regulated 16 kDa protein-like OS=Octopus vulgaris	MNNSLHFIPLFLFAFAVVVGASPYQACQSELGTVSDVR	0.976544	NAMP	0
Uncharacterized protein OS=Octopus vulgaris	FGIGYSDDGIGCACMVTGTCPDK	0.975629	AMP	0.692
26S proteasome non-ATPase regulatory subunit 2 OS=Octopus vulgaris	SLMSPVAVAGLLSVLISCLDVK	0.975381	NAMP	0.054
SCO-spondin-like OS=Octopus vulgaris	CDGHDDCGDASDEIGCTCTCK	0.973336	AMP	0.733
myosin heavy chain, non-muscle isoform X3 OS=Octopus vulgaris	NWQWWR	0.973264	AMP	0.959
DNAH OS=Sepia pharaonis	CYLCLMGALQLDLGGAPAGPAGTGK	0.971438	AMP	0.693
Uncharacterized protein OS=Octopus vulgaris	MIFLSSLGLLACFVAASQAIAPPQLLDYEIGFGNISHGR	0.970085	NAMP	0.007
Tetraspanin OS=Octopus vulgaris	EHNVCTMVFAVLLALIFILQLAGGIAAFVMR	0.969205	NAMP	0.082
Uncharacterized protein OS=Octopus vulgaris	NLSFIAAVAVIATLCLGIAGNPSPTMPPPLK	0.968952	NAMP	0.154
Uncharacterized protein OS=Octopus vulgaris	NENGALLYLVEGICGSLPCPPYVYGR	0.967829	NAMP	0.464
Probable methylmalonate-semialdehyde dehydrogenase [acylating], mitochondrial OS=Octopus vulgaris	GLQVVETCCSLSATCLGETLTGIAK	0.967224	AMP	0.937
Mucin-19-like OS=Octopus vulgaris	CTCTDGEIVCTNITDDCCSYSEWSSWGACSK	0.967164	AMP	0.925
Vitellogenin-like OS=Octopus vulgaris	MDYFAVIVVVAAVVTGGQAGTIK	0.966977	NAMP	0.477
Plastin-1 isoform X1 OS=Octopus vulgaris	MLLTIFACLMALDIELNSKPIEEE	0.966575	NAMP	0.016
RING-type domain-containing protein OS=Octopus bimaculoides	LVATHCVENFWCVDVLSYACYILYSIQR	0.966503	NAMP	0.187
H(+)-transporting two-sector ATPase OS=Octopus vulgaris	FCPFYK	0.966449	NAMP	0.328
MAM and LDL-receptor class A domain-containing protein 2-like OS=Octopus vulgaris	FDPDMWR	0.966424	NAMP	0.002
A disintegrin and metalloproteinase with thrombospondin motifs 12-like OS=Octopus vulgaris	MLPLIFLLSTVLLVAPVQPKPIHNLNEPHLK	0.966116	NAMP	0.006
Prominin-1 OS=Octopus vulgaris	IYVLLLLVTMILLSTGLACTLASISQMER	0.965185	NAMP	0.026
Lysosomal alpha-glucosidase-like OS=Octopus vulgaris	TFFVGVGILFSIFAITSAFLLIILPCYR	0.964911	NAMP	0.109
Metalloendopeptidase OS=Octopus vulgaris	HGSGCNSQLGMVGGVQAVNLDANGCR	0.964546	NAMP	0.142
TraB domain-containing protein-like, partial OS=Pantholops hodgsonii	SSCTNASASSWWACSVALAASMAAGWTPCR	0.963709	AMP	0.887
Leucine-rich repeat and immunoglobulin-like domain-containing nogo receptor-interacting protein 1-B isoform X4 OS=Octopus vulgaris	LTFLLILSMSFCLESHAASDICTTCR	0.963189	NAMP	0.131
Uncharacterized protein OS=Octopus vulgaris	YNCMCFR	0.963145	NAMP	0.039
MAM and LDL-receptor class A domain-containing protein 2-like OS=Octopus vulgaris	QISVCLTLLIFVALTSGYATYNGDVALEYSGLVK	0.961165	NAMP	0.325
MAM and LDL-receptor class A domain-containing protein 2-like OS=Octopus vulgaris	GCPGPFDCDFQNGICK	0.959452	AMP	0.856
Dystrophin isoform X4 OS=Octopus vulgaris	CIIMYIMCLFQVLQNSSNNSSNETNTK	0.95929	NAMP	0.052
Sushi, von Willebrand factor type A, EGF and pentraxin domain-containing protein 1 isoform X1 OS=Octopus vulgaris	CSPGFLLDGTSSLFCNFGK	0.958435	NAMP	0.477
Uncharacterized protein OS=Octopus vulgaris	VLLVISSLLFCYVAVTSVHGEEEDHSK	0.958364	NAMP	0.134
Hypothetical protein OS=Lottia gigantea	VFVICHCLHEAILTVINCSLSNTK	0.957557	AMP	0.922
TLS OS=Sepia pharaonis	QGDWTCPNPACGNNNFGWR	0.9572	NAMP	0.286
Uncharacterized protein OS=Octopus vulgaris	ASSTQTGLSLTQSILGCCPNTFEGWCSAK	0.956771	AMP	0.622
Myosin heavy chain, striated muscle OS=Argopecten irradians	YQSGFIYTYSGLFCVAINPYR	0.956725	NAMP	0.023
Beta-hexosaminidase OS=Octopus vulgaris	MASGYVSLSRPFFFLLLSTFCIALNSNIR	0.955179	NAMP	0.022
Uncharacterized protein OS=Octopus vulgaris	WWLPLAIPFK	0.953261	AMP	0.927
Malate dehydrogenase OS=Octopus vulgaris	DDLFNTNASIVGNLADACAQFCPK	0.953131	NAMP	0.461
Uncharacterized protein isoform X1 OS=Crassostrea gigas	MGWYMR	0.952753	NAMP	0.002
Uncharacterized protein OS=Octopus bimaculoides	NENGALLYFVQAVCGSLPCPPYVNGQELTCVVCSK	0.95255	AMP	0.649
H(+)-transporting two-sector ATPase OS=Octopus vulgaris	VLDALFPCVQGGTTAIPGAFGCGK	0.952067	AMP	0.958
Myosin heavy chain, striated muscle OS=Argopecten irradians	NWEWWR	0.951523	NAMP	0.478
PDZ and LIM domain protein Zasp isoform X3 OS=Octopus vulgaris	SWCPAHFVCANPNCGVK	0.95145	AMP	0.835
Collagen alpha-4(IV) chain OS=Octopus vulgaris	FSPIPFLFCTISGTCNFATR	0.95134	AMP	0.505
Uncharacterized protein OS=Octopus vulgaris	CNCDGSWNCPAENAEYICGASTGNCQQCDAK	0.95119	AMP	0.978
Uncharacterized protein OS=Octopus vulgaris	NMWSMFMK	0.949874	NAMP	0.015
Uncharacterized protein OS=Octopus vulgaris	CQCNCDGGWNCPK	0.949702	AMP	0.934
Uncharacterized protein OS=Octopus vulgaris	APFGIFLHSPWLMNNLNPLK	0.949521	NAMP	0.108
MAM and LDL-receptor class A domain-containing protein 2-like OS=Octopus vulgaris	HFSFFK	0.949414	NAMP	0.229
MAM and LDL-receptor class A domain-containing protein 2-like OS=Octopus vulgaris	FDYDMWR	0.949171	NAMP	0
Heme-binding protein 2-like OS=Stegastes partitus	DWFYMTGFK	0.949111	NAMP	0.001
Filamin-A isoform X1 OS=Octopus vulgaris	AIGALVDACGPGLCPDWADWAPK	0.948884	AMP	0.869
Uncharacterized protein OS=Octopus vulgaris	NFPSDYDNGAFCMWR	0.947478	NAMP	0.001
Hypothetical protein OS=Lottia gigantea	WPWNRPAPR	0.947424	AMP	0.682
Chitotriosidase-1-like OS=Octopus vulgaris	MLTYSGILLLVLSGISLVAGK	0.947256	NAMP	0.46
Uncharacterized protein OS=Octopus vulgaris	DDNVYSYWPGAMGVDGMCGCGILK	0.945488	NAMP	0.228
Uncharacterized protein OS=Octopus vulgaris	NLQCQTCSGIICNEVTSCPGTEPVCR	0.945099	AMP	0.619
Thioredoxin-like OS=Amphimedon queenslandica	LIIIDFFATWCGPCK	0.944114	NAMP	0.467
Uncharacterized protein OS=Octopus vulgaris	MNDNCDPNPCEGGTCTNLINDYQCNCFSGYEGK	0.943603	NAMP	0.014
Neurotrypsin OS=Octopus vulgaris	DYLQLFAYLLIFTSCCGMLK	0.943471	NAMP	0.159
Apolipophorin OS=Hyriopsis cumingii	ALWAWR	0.94317	AMP	0.785
Glyoxylate reductase/hydroxypyruvate reductase OS=Octopus vulgaris	NGNWGLWKPMWILGSSFANR	0.942087	AMP	0.645
Uncharacterized protein OS=Octopus vulgaris	QQLSWCFTPLASILFR	0.941177	NAMP	0.048
Mucin-19-like OS=Octopus vulgaris	TGCISGCQCPDGTLMNDIGICVK	0.941086	AMP	0.826
Uncharacterized protein OS=Octopus vulgaris	FACYFVYPR	0.940743	NAMP	0.044
Uncharacterized protein OS=Octopus vulgaris	SSNLLLCSLFLLMCVR	0.940376	NAMP	0.215
SCO-spondin-like OS=Octopus vulgaris	CIPAIECPCYMNGLR	0.940261	NAMP	0.172
Myosin heavy chain, non-muscle isoform X3 OS=Octopus vulgaris	YYSGLIYTYSGLFCVVVNPYK	0.939159	NAMP	0.061
Hypothetical protein OS=Branchiostoma floridae	FAIVLCLASVAYGCCAPEYFTAHTLIR	0.939147	AMP	0.615
Complement factor H-like OS=Octopus vulgaris	GESVLTCLSDGSWNFPAPVCTLNCFVPEIAGR	0.938016	NAMP	0.194
MAM and LDL-receptor class A domain-containing protein 2-like OS=Octopus vulgaris	CNCCCGGMVCAAK	0.937967	AMP	0.977
Uncharacterized protein OS=Octopus vulgaris	LPFYGSFFIR	0.937912	NAMP	0.093
Twinfilin-1 OS=Octopus vulgaris	YHFFIFK	0.937249	NAMP	0.419
Uncharacterized protein OS=Octopus vulgaris	LWMFWSK	0.93387	AMP	0.813
Uncharacterized protein OS=Octopus vulgaris	GMNGSCSFPLLYLLYHVQTYSK	0.933045	NAMP	0.056
Collagen alpha-1(I) chain isoform X1 OS=Octopus vulgaris	GSNGPPGPPGPQGYLGPR	0.932538	NAMP	0.105
SCO-spondin-like OS=Octopus vulgaris	CIEGCFCAPGFIR	0.932068	AMP	0.811
Unconventional myosin-VI isoform X4 OS=Octopus vulgaris	QGWWYAHFDGR	0.931747	NAMP	0.002
Spectrin alpha chain isoform X2 OS=Octopus vulgaris	EFSMMFR	0.931708	NAMP	0.001
Complement factor H-like OS=Octopus vulgaris	FSCLSGYFLR	0.93163	NAMP	0.095
Aminopeptidase OS=Octopus vulgaris	DHWQFFCER	0.93076	NAMP	0
Choline transporter-like protein OS=Octopus vulgaris	CCFWCLEK	0.928987	NAMP	0.101
PDZ and LIM domain protein Zasp isoform X3 OS=Octopus vulgaris	LDPNTPWGFR	0.928943	NAMP	0.006
Hypothetical protein OS=Lottia gigantea	AISCLLLFAIITAVNSDIFCQSPR	0.9281	AMP	0.884
Lysosomal alpha-glucosidase-like OS=Octopus vulgaris	GCCWRPTMDR	0.927804	NAMP	0.029
Metalloendopeptidase OS=Octopus vulgaris	CGDGGGGGGGGGGGGK	0.927201	NAMP	0.034
Uncharacterized protein OS=Octopus vulgaris	LFCPLMYR	0.927026	NAMP	0.047
Uncharacterized protein OS=Octopus vulgaris	QTGPTSCEDIDECAEGTHQCDENANCFNTIGSYFCR	0.926559	NAMP	0.034
Short-chain collagen C4-like OS=Octopus vulgaris	DENGALLYFVQAACGSLPCPPYVNGR	0.926119	NAMP	0.335
Uncharacterized protein OS=Octopus vulgaris	QLLCDGTDDCGDSTDEVSCDQQCQYYSSGLSGLIK	0.926119	NAMP	0.015
Heme-binding protein 2-like OS=Stegastes partitus	LWFDKPPHFR	0.925721	NAMP	0.009
Uncharacterized protein OS=Octopus vulgaris	CDAPSSDQQTMMIVGIVIGVALFVLTVVLIAFFIK	0.925686	NAMP	0.011
Apolipophorin OS=Hyriopsis cumingii	MVVPTCVGLPLNLSFAATSSVK	0.925106	NAMP	0.111
Uncharacterized protein OS=Octopus vulgaris	YDCICNCDGGWR	0.923301	NAMP	0.038
Metalloendopeptidase OS=Octopus vulgaris	DHPFMPLK	0.922327	NAMP	0.072
Threonine--tRNA ligase, cytoplasmic-like, partial OS=Pantholops hodgsonii	GAFLLPGR	0.922296	AMP	0.706
Protein-glucosylgalactosylhydroxylysine glucosidase isoform X2 OS=Octopus vulgaris	QADVILLGFPLMMNMPK	0.922173	NAMP	0.03
60S ribosomal protein L4-A OS=Octopus vulgaris	SGQGAFGNMCR	0.921423	NAMP	0.064
Uncharacterized protein OS=Octopus vulgaris	CQCQPGFR	0.92139	NAMP	0.471
Metalloendopeptidase OS=Octopus vulgaris	FLFGFFYPVVLR	0.921305	NAMP	0.142
Uncharacterized protein OS=Octopus vulgaris	NWVPPFK	0.92129	NAMP	0.016
Astacin-like squid metalloprotease type III (Fragment) OS=Sepioteuthis lessoniana	YCLSFWYHMHGR	0.920967	NAMP	0.002
Uncharacterized protein OS=Octopus vulgaris	QFPYPCHMK	0.920242	NAMP	0.048
MAM and LDL-receptor class A domain-containing protein 2-like OS=Octopus vulgaris	YFSCDFEDMYMCGFK	0.92021	NAMP	0.007
Uncharacterized protein OS=Octopus vulgaris	GSNQHSWNAVYIYGHWCLIDCHWAAR	0.919768	NAMP	0.319
Clathrin heavy chain OS=Sepia pharaonis	QQWLLLIGISAQVNAEISAVTPPTQQNR	0.919551	NAMP	0.221
Hypothetical protein OS=Sepia pharaonis	IYLFLFR	0.919391	AMP	0.966
Protein flp-like OS=Octopus vulgaris	ELFVFCCFCVIIFSDSIQCR	0.919232	AMP	0.665
Uncharacterized protein OS=Octopus vulgaris	YGIPKPWYFPFYPK	0.919045	NAMP	0.317
Dystrophin isoform X4 OS=Octopus vulgaris	CFNFDVCQNCFFSGR	0.918754	AMP	0.614
Uncharacterized protein OS=Octopus vulgaris	CVSFFNLR	0.918666	NAMP	0.107
Inter-alpha-trypsin inhibitor heavy chain H4-like OS=Octopus vulgaris	LLFVMLGAVFYLGMTANGEPR	0.918111	NAMP	0.026
Lysozyme OS=Octopus vulgaris	CFEPNCLNFAR	0.917923	NAMP	0.093
Uncharacterized protein OS=Octopus vulgaris	CQCFLDGSWNCPAATTEDICR	0.917519	AMP	0.728
Hypothetical protein OS=Helobdella robusta	NFFIQCDMSGNYFVRPCAPGTQWSQSAYTCV	0.917355	NAMP	0.236
CTSL OS=Sepia pharaonis	DCGNLGCNGGLMDQAFTCIK	0.917293	AMP	0.817
Prominin-1 OS=Octopus vulgaris	WFADMK	0.917097	NAMP	0.001
MAM and LDL-receptor class A domain-containing protein 2-like OS=Octopus vulgaris	MNWYPR	0.917045	NAMP	0.105
Uncharacterized protein OS=Octopus vulgaris	SHCHLHQFGGLFR	0.916746	NAMP	0.013
Uncharacterized protein OS=Aplysia californica	QTIMWLTNVILITLAISTLGNAAILK	0.916707	AMP	0.824
Uncharacterized protein OS=Octopus vulgaris	QPYPFPK	0.916656	AMP	0.895
Uncharacterized protein OS=Octopus vulgaris	WHYFLTLFK	0.916574	NAMP	0.081
PDZ and LIM domain protein Zasp isoform X3 OS=Octopus vulgaris	CNQVIIGECVNAMNTTFHPNCFLCAQCR	0.916529	AMP	0.903
Aminopeptidase OS=Octopus vulgaris	AFPCWDEPSFK	0.91609	NAMP	0.003
Uncharacterized protein OS=Strongylocentrotus purpuratus	FSGPWYTIWK	0.915775	NAMP	0.341
Peptidyl-prolyl cis-trans isomerase OS=Octopus vulgaris	GYDFMR	0.915124	NAMP	0.001
Uncharacterized protein OS=Crassostrea gigas	SVWNDGCQLQCTCQNATSGMYECHQR	0.915042	NAMP	0.04
Apolipophorin OS=Hyriopsis cumingii	QSPFFPLTGPMVLK	0.914487	NAMP	0.017
Uncharacterized protein OS=Octopus vulgaris	NEDGALLYFVQAACGSLPCPPYVNGR	0.91398	NAMP	0.323
DNAH OS=Sepia pharaonis	IPVFANFWK	0.913394	NAMP	0.277
Uncharacterized protein OS=Octopus vulgaris	DVPPDVSSYWLQCMNASLCYIYIR	0.913075	NAMP	0.155
Epididymal secretory protein E1-like OS=Ciona intestinalis	YPPFCLIYLLSVLYKPYR	0.912874	NAMP	0.081
Prominin-1 OS=Octopus vulgaris	NQLLHFADYLLGIWNNFVSNILR	0.912816	AMP	0.852
Astacin-like metalloprotease OS=Sepiella maindroni	HCLQFWYHMYGK	0.912213	NAMP	0.004
Argininosuccinate synthase OS=Octopus vulgaris	GFWFSPECEFTR	0.911442	NAMP	0.001
Neural cell adhesion molecule 2 isoform X3 OS=Octopus vulgaris	EVPITAASTGISSGGVAGLIIALILIILIILDLICYFK	0.911123	NAMP	0.089
Mucin-19-like OS=Octopus vulgaris	YSNGTSTYMDCYPCECVNSVWQCATK	0.910514	NAMP	0.123
Inter-alpha-trypsin inhibitor heavy chain H3 OS=Crassostrea gigas	DTLPNIPGIFIKPFSCSNNLCLR	0.910355	AMP	0.782
Short-chain collagen C4-like isoform X1 OS=Octopus vulgaris	FSVSSFITFGLFLVLTIAILHFDAR	0.909489	NAMP	0.057
Uncharacterized protein OS=Octopus vulgaris	SKPDPFSLSWR	0.909034	NAMP	0.022
Mucin-like protein OS=Octopus vulgaris	CSGFGEYCFNVPGSFQCK	0.909029	AMP	0.826
Protein flp-like OS=Octopus vulgaris	GIGEMCFMR	0.909029	NAMP	0.002
Uncharacterized protein OS=Octopus vulgaris	CVCYNGFR	0.908587	NAMP	0.174
Uncharacterized protein OS=Octopus bimaculoides	IFAGFLLR	0.907967	AMP	0.922
Uncharacterized protein OS=Octopus vulgaris	FIDALFEWLQIFIR	0.90713	NAMP	0.081
Cathepsin L1 OS=Octopus vulgaris	NSWGGSWGMK	0.904726	NAMP	0.095
Uncharacterized protein OS=Octopus vulgaris	SEINAILCQLINTLNLENCANK	0.903586	AMP	0.825
Lysosomal alpha-glucosidase-like OS=Octopus vulgaris	AFSYWYK	0.903417	NAMP	0.029
SCO-spondin-like OS=Octopus vulgaris	NMHYDSDGNCVSLADCSCYDK	0.903351	NAMP	0.032
Hemocyanin G-type, units Oda to Odg-like OS=Octopus vulgaris	MFAGFLLK	0.902865	AMP	0.512
Uncharacterized protein OS=Octopus vulgaris	QESECILPSDCGCVYNDVYYAIGDQIVISNCSK	0.902826	AMP	0.59
Hemocyanin 1-like OS=Octopus vulgaris	YACCLHGMPVFPHWHR	0.90265	NAMP	0.012
Hypothetical protein OS=Lottia gigantea	HGSTQLFSLVSSILSLIICAVLLEQR	0.901133	NAMP	0.209
Collagen alpha-4(VI) chain-like OS=Crassostrea gigas	ATTTATMALSIVAVYLSVCLAIFTGNALGR	0.900627	NAMP	0.345
Neuroblast differentiation-associated protein AHNAK isoform X37 OS=Octopus vulgaris	FYPPDPSLLR	0.900308	NAMP	0.007
